# Supplementary material
Source: ML conference proceedings conference paper supplement (https://openaccess.thecvf.com/content/WACV2023/html/Plack_Fast_Differentiable_Transient_WACV_2023_paper.html)
Supplement: Supplementary file 2 [file Plack_Fast_Differentiable_Transient_WACV_2023_supplemental.zip]

Archive with 145 entries (116 files):
- code/
- code/setup.py
- code/README.md
- code/LICENSE
- code/Dockerfile
- code/docker-compose.yml
- code/CMakeLists.txt
- code/samples/
- code/totri/
- code/totri/__init__.py
- code/totri/types.py
- code/src/
- code/src/totri.cpp
- code/cmake/
- code/cmake/FindOptiX.cmake
- code/cmake/configure_optix.cmake
- code/extern/
- code/samples/wacv/
- code/totri/util/
- code/totri/util/__init__.py
- code/totri/util/video.py
- code/totri/util/render.py
- code/totri/util/rbf2volume.py
- code/totri/util/optim.py
- code/totri/util/log.py
- code/totri/util/format.py
- code/totri/util/depthmap.py
- code/totri/render/
- code/totri/render/__init__.py
- code/totri/render/volume.py
- code/totri/render/mesh.py
- code/totri/reconstruct/
- code/totri/reconstruct/__init__.py
- code/totri/reconstruct/fk_migration.py
- code/totri/reconstruct/backprojection.py
- code/totri/fitting/
- code/totri/fitting/__init__.py
- code/totri/fitting/rbf_backup.py
- code/totri/fitting/rbf.py
- code/totri/fitting/pose.py
- code/totri/fitting/depth_map.py
- code/totri/fitting/background.py
- code/totri/data/
- code/totri/data/__init__.py
- code/totri/data/zaragoza.py
- code/totri/data/veltennc2012.py
- code/totri/data/util.py
- code/totri/data/pfm.py
- code/totri/data/otooleconfocal2018.py
- code/totri/data/mesh.py
- code/totri/data/lindellfk2019.py
- code/src/util/
- code/src/util/rbf2volume_cuda.h
- code/src/util/rbf2volume_cuda.cu
- code/src/util/rbf2volume.h
- code/src/util/rbf2volume.cpp
- code/src/render/
- code/src/render/volume_cuda.h
- code/src/render/volume_cuda.cu
- code/src/render/volume.h
- code/src/render/volume.cpp
- code/src/render/mesh_cuda.h
- code/src/render/mesh_cuda.cu
- code/src/render/mesh.h
- code/src/render/mesh.cpp
- code/src/reconstruct/
- code/src/reconstruct/backprojection_cuda.h
- code/src/reconstruct/backprojection_cuda.cu
- code/src/reconstruct/backprojection.h
- code/src/reconstruct/backprojection.cpp
- code/src/common/
- code/src/common/triangle.h
- code/src/common/optix.h
- code/src/common/optix.cu
- code/src/common/math.h
- code/src/common/context_manager.h
- code/src/common/const.h
- code/src/common/buffer.h
- code/extern/tomcubes/
- code/extern/tomcubes/setup.py
- code/extern/tomcubes/README.md
- code/extern/tomcubes/LICENSE
- code/extern/tomcubes/Dockerfile
- code/extern/tomcubes/docker-compose.yml
- code/samples/wacv/tracking/
- code/samples/wacv/tracking/bunny.py
- code/samples/wacv/tracking/armadillos.py
- code/samples/wacv/statue/
- code/samples/wacv/statue/statue_512.py
- code/samples/wacv/statue/statue_128.py
- code/samples/wacv/statue/statue_64.py
- code/samples/wacv/statue/statue_32.py
- code/samples/wacv/self_supervised/
- code/samples/wacv/self_supervised/w.obj
- code/samples/wacv/self_supervised/v.obj
- code/samples/wacv/self_supervised/a.obj
- code/samples/wacv/self_supervised/self_supervised.py
- code/samples/wacv/self_supervised/c.obj
- code/samples/wacv/mannequin/
- code/samples/wacv/mannequin/mannequin_synthetic.py
- code/samples/wacv/mannequin/mannequin_setup.py
- code/samples/wacv/mannequin/mannequin_measurement_nobg.py
- code/samples/wacv/mannequin/mannequin_measurement.py
- code/samples/wacv/diffuse_s/
- code/samples/wacv/diffuse_s/diffuse_s_raw.py
- code/samples/wacv/diffuse_s/diffuse_s_flatfield.py
- code/samples/wacv/color/
- code/samples/wacv/color/spot.py
- code/samples/wacv/bunny/
- code/samples/wacv/bunny/bunny.py
- code/samples/wacv/bunny_zaragoza/
- code/samples/wacv/bunny_zaragoza/bunny_zaragoza_sinogram_rbf.py
- code/samples/wacv/bunny_zaragoza/bunny_zaragoza_rbf.py
- code/samples/wacv/bunny_zaragoza/bunny_zaragoza_fk.py
- code/samples/wacv/bunny_zaragoza/bunny_zaragoza_depth_map.py
- code/samples/wacv/bunny_zaragoza/bunny_reference.py
- code/src/render/program/
- code/src/render/program/mesh_program.h
- code/src/render/program/mesh_program.cu
- code/src/render/program/mesh_exhaustive_grad_verts_optix.cu
- code/src/render/program/mesh_exhaustive_grad_verts.h
- code/src/render/program/mesh_exhaustive_grad_verts.cu
- code/src/render/program/mesh_exhaustive_forward_optix.cu
- code/src/render/program/mesh_exhaustive_forward.h
- code/src/render/program/mesh_exhaustive_forward.cu
- code/src/render/program/mesh_confocal_grad_verts_optix.cu
- code/src/render/program/mesh_confocal_grad_verts.h
- code/src/render/program/mesh_confocal_grad_verts.cu
- code/src/render/program/mesh_confocal_forward_optix.cu
- code/src/render/program/mesh_confocal_forward.h
- code/src/render/program/mesh_confocal_forward.cu
- code/src/render/program/mesh_common.h
- code/extern/tomcubes/tomcubes/
- code/extern/tomcubes/tomcubes/__init__.py
- code/extern/tomcubes/tomcubes/tomcubes.py
- code/extern/tomcubes/src/
- code/extern/tomcubes/src/tomcubes_kernel.h
- code/extern/tomcubes/src/tomcubes_kernel.cu
- code/extern/tomcubes/src/tomcubes_cuda.cpp
- code/extern/tomcubes/src/tables.h
- code/extern/tomcubes/src/defines.h
- code/extern/tomcubes/sample/
- code/extern/tomcubes/sample/util.py
- code/extern/tomcubes/sample/ball.py
- Supplementary_Material.pdf
