# Supplementary material
Source: ML conference proceedings conference paper supplement (https://openaccess.thecvf.com/content/WACV2023/html/Plack_Fast_Differentiable_Transient_WACV_2023_paper.html)
Supplement: Supplementary file 2 [file Plack_Fast_Differentiable_Transient_WACV_2023_supplemental.zip › code/cmake/configure_optix.cmake]

# ======================================================================== #
# Copyright 2018 Ingo Wald                                                 #
#                                                                          #
# Licensed under the Apache License, Version 2.0 (the "License");          #
# you may not use this file except in compliance with the License.         #
# You may obtain a copy of the License at                                  #
#                                                                          #
#     http://www.apache.org/licenses/LICENSE-2.0                           #
#                                                                          #
# Unless required by applicable law or agreed to in writing, software      #
# distributed under the License is distributed on an "AS IS" BASIS,        #
# WITHOUT WARRANTIES OR CONDITIONS OF ANY KIND, either express or implied. #
# See the License for the specific language governing permissions and      #
# limitations under the License.                                           #
# ======================================================================== #

find_package(CUDA REQUIRED)
find_package(OptiX REQUIRED)

if (CUDA_TOOLKIT_ROOT_DIR)
	include_directories(${CUDA_TOOLKIT_ROOT_DIR}/include)
endif()
include_directories(${OptiX_INCLUDE})

if (WIN32)
  add_definitions(-DNOMINMAX)
endif()

find_program(BIN2C bin2c
  DOC "Path to the cuda-sdk bin2c executable.")

# this macro defines cmake rules that execute the following four steps:
# 1) compile the given cuda file ${cuda_file} to an intermediary PTX file
# 2) use the 'bin2c' tool (that comes with CUDA) to
#    create a second intermediary (.c-)file which defines a const string variable
#    (named '${c_var_name}') whose (constant) value is the PTX output
#    from the previous step.
# 3) compile the given .c file to an intermediary object file (why thus has
#    that PTX string 'embedded' as a global constant.
# 4) assign the name of the intermediary .o file to the cmake variable
#    'output_var', which can then be added to cmake targets.
macro(cuda_compile_and_embed output_var cuda_file includes)
  set(c_var_name ${output_var})
  if ("${includes}" STREQUAL "")
    set(INCLUDE_OPTIONS "")
  else()
    set(INCLUDE_OPTIONS "-I=${includes}")
  endif()
  cuda_compile_ptx(ptx_files ${cuda_file} OPTIONS --generate-line-info -use_fast_math --keep --std=c++14 ${INCLUDE_OPTIONS})
  list(GET ptx_files 0 ptx_file)
  set(embedded_file ${ptx_file}_embedded.cpp)
  message("adding rule to compile and embed ${cuda_file} to \"const char ${c_var_name}[];\"")
  add_custom_command(
    OUTPUT ${embedded_file}
    COMMAND ${BIN2C} --padd 0 --type char --name ${c_var_name} ${ptx_file} > ${embedded_file}
    DEPENDS ${ptx_file}
    COMMENT "compiling (and embedding ptx from) ${cuda_file} to ${embedded_file}"
    )
  set(${output_var} ${embedded_file})
endmacro()

add_definitions(-D__CUDA_INCLUDE_COMPILER_INTERNAL_HEADERS__=1)
