# Supplementary material
Source: ML conference proceedings conference paper supplement (https://openaccess.thecvf.com/content/WACV2023/html/Plack_Fast_Differentiable_Transient_WACV_2023_paper.html)
Supplement: Supplementary file 2 [file Plack_Fast_Differentiable_Transient_WACV_2023_supplemental.zip › code/docker-compose.yml]

version: "3.8"
services:
  totrilib-dev:
    container_name: totrilib-dev
    build:
      context: .
      dockerfile: Dockerfile
      target: dev
    image: totrilib:dev
    network_mode: "host"
    shm_size: '8gb'
    volumes:
      - .:/workspace/totrilib
      - totrilib-dev-vscode:/root/.vscode-server
    environment:
      - NVIDIA_DRIVER_CAPABILITIES=utility,compute,graphics
      - CMAKE_EXPORT_COMPILE_COMMANDS=ON
      - CMAKE_BUILD_PARALLEL_LEVEL=16
    deploy:
      resources:
        reservations:
          devices:
            - capabilities: [gpu]
    command: "/bin/bash --init-file /workspace/totrilib/.vscode/setup.sh"
    stdin_open: true
    tty: true
volumes:
  totrilib-dev-vscode:
