# Supplementary material
Source: ML conference proceedings conference paper supplement (https://openaccess.thecvf.com/content/WACV2023/html/Plack_Fast_Differentiable_Transient_WACV_2023_paper.html)
Supplement: Supplementary file 2 [file Plack_Fast_Differentiable_Transient_WACV_2023_supplemental.zip › code/extern/tomcubes/sample/util.py]

import torch
import meshplot as mp

def plot_mesh(verts):
    faces = torch.arange(0, verts.shape[0]).view(-1,3)
    mp.plot(verts.cpu().numpy(), faces.numpy())
