# Supplementary material
Source: ML conference proceedings conference paper supplement (https://openaccess.thecvf.com/content/WACV2023/html/Plack_Fast_Differentiable_Transient_WACV_2023_paper.html)
Supplement: Supplementary file 2 [file Plack_Fast_Differentiable_Transient_WACV_2023_supplemental.zip › code/extern/tomcubes/setup.py]

"""ToMCubes"""
from setuptools import setup
from torch.utils import cpp_extension

setup(
    name="tomcubes",
    ext_modules=[
        cpp_extension.CUDAExtension(
            "tomcubes_cuda",
            ["src/tomcubes_cuda.cpp", "src/tomcubes_kernel.cu"],
        ),
    ],
    cmdclass={"build_ext": cpp_extension.BuildExtension},
    install_requires=[
        "torch",
    ],
    packages=["tomcubes"],
)
