# Supplementary material
Source: ML conference proceedings conference paper supplement (https://openaccess.thecvf.com/content/WACV2023/html/Plack_Fast_Differentiable_Transient_WACV_2023_paper.html)
Supplement: Supplementary file 2 [file Plack_Fast_Differentiable_Transient_WACV_2023_supplemental.zip › code/extern/tomcubes/src/tables.h]

/* Copyright (c) 2022, NVIDIA CORPORATION. All rights reserved.
 *
 * Redistribution and use in source and binary forms, with or without
 * modification, are permitted provided that the following conditions
 * are met:
 *  * Redistributions of source code must retain the above copyright
 *    notice, this list of conditions and the following disclaimer.
 *  * Redistributions in binary form must reproduce the above copyright
 *    notice, this list of conditions and the following disclaimer in the
 *    documentation and/or other materials provided with the distribution.
 *  * Neither the name of NVIDIA CORPORATION nor the names of its
 *    contributors may be used to endorse or promote products derived
 *    from this software without specific prior written permission.
 *
 * THIS SOFTWARE IS PROVIDED BY THE COPYRIGHT HOLDERS ``AS IS'' AND ANY
 * EXPRESS OR IMPLIED WARRANTIES, INCLUDING, BUT NOT LIMITED TO, THE
 * IMPLIED WARRANTIES OF MERCHANTABILITY AND FITNESS FOR A PARTICULAR
 * PURPOSE ARE DISCLAIMED.  IN NO EVENT SHALL THE COPYRIGHT OWNER OR
 * CONTRIBUTORS BE LIABLE FOR ANY DIRECT, INDIRECT, INCIDENTAL, SPECIAL,
 * EXEMPLARY, OR CONSEQUENTIAL DAMAGES (INCLUDING, BUT NOT LIMITED TO,
 * PROCUREMENT OF SUBSTITUTE GOODS OR SERVICES; LOSS OF USE, DATA, OR
 * PROFITS; OR BUSINESS INTERRUPTION) HOWEVER CAUSED AND ON ANY THEORY
 * OF LIABILITY, WHETHER IN CONTRACT, STRICT LIABILITY, OR TORT
 * (INCLUDING NEGLIGENCE OR OTHERWISE) ARISING IN ANY WAY OUT OF THE USE
 * OF THIS SOFTWARE, EVEN IF ADVISED OF THE POSSIBILITY OF SUCH DAMAGE.
 */

/*
  Tables for Marching Cubes
  http://local.wasp.uwa.edu.au/~pbourke/geometry/polygonise/
*/

// triangle table maps same cube vertex index to a list of up to 5 triangles
// which are built from the interpolated edge vertices
#define X 255
uint triTable[256][16] = {{X, X, X, X, X, X, X, X, X, X, X, X, X, X, X, X},
                          {0, 8, 3, X, X, X, X, X, X, X, X, X, X, X, X, X},
                          {0, 1, 9, X, X, X, X, X, X, X, X, X, X, X, X, X},
                          {1, 8, 3, 9, 8, 1, X, X, X, X, X, X, X, X, X, X},
                          {1, 2, 10, X, X, X, X, X, X, X, X, X, X, X, X, X},
                          {0, 8, 3, 1, 2, 10, X, X, X, X, X, X, X, X, X, X},
                          {9, 2, 10, 0, 2, 9, X, X, X, X, X, X, X, X, X, X},
                          {2, 8, 3, 2, 10, 8, 10, 9, 8, X, X, X, X, X, X, X},
                          {3, 11, 2, X, X, X, X, X, X, X, X, X, X, X, X, X},
                          {0, 11, 2, 8, 11, 0, X, X, X, X, X, X, X, X, X, X},
                          {1, 9, 0, 2, 3, 11, X, X, X, X, X, X, X, X, X, X},
                          {1, 11, 2, 1, 9, 11, 9, 8, 11, X, X, X, X, X, X, X},
                          {3, 10, 1, 11, 10, 3, X, X, X, X, X, X, X, X, X, X},
                          {0, 10, 1, 0, 8, 10, 8, 11, 10, X, X, X, X, X, X, X},
                          {3, 9, 0, 3, 11, 9, 11, 10, 9, X, X, X, X, X, X, X},
                          {9, 8, 10, 10, 8, 11, X, X, X, X, X, X, X, X, X, X},
                          {4, 7, 8, X, X, X, X, X, X, X, X, X, X, X, X, X},
                          {4, 3, 0, 7, 3, 4, X, X, X, X, X, X, X, X, X, X},
                          {0, 1, 9, 8, 4, 7, X, X, X, X, X, X, X, X, X, X},
                          {4, 1, 9, 4, 7, 1, 7, 3, 1, X, X, X, X, X, X, X},
                          {1, 2, 10, 8, 4, 7, X, X, X, X, X, X, X, X, X, X},
                          {3, 4, 7, 3, 0, 4, 1, 2, 10, X, X, X, X, X, X, X},
                          {9, 2, 10, 9, 0, 2, 8, 4, 7, X, X, X, X, X, X, X},
                          {2, 10, 9, 2, 9, 7, 2, 7, 3, 7, 9, 4, X, X, X, X},
                          {8, 4, 7, 3, 11, 2, X, X, X, X, X, X, X, X, X, X},
                          {11, 4, 7, 11, 2, 4, 2, 0, 4, X, X, X, X, X, X, X},
                          {9, 0, 1, 8, 4, 7, 2, 3, 11, X, X, X, X, X, X, X},
                          {4, 7, 11, 9, 4, 11, 9, 11, 2, 9, 2, 1, X, X, X, X},
                          {3, 10, 1, 3, 11, 10, 7, 8, 4, X, X, X, X, X, X, X},
                          {1, 11, 10, 1, 4, 11, 1, 0, 4, 7, 11, 4, X, X, X, X},
                          {4, 7, 8, 9, 0, 11, 9, 11, 10, 11, 0, 3, X, X, X, X},
                          {4, 7, 11, 4, 11, 9, 9, 11, 10, X, X, X, X, X, X, X},
                          {9, 5, 4, X, X, X, X, X, X, X, X, X, X, X, X, X},
                          {9, 5, 4, 0, 8, 3, X, X, X, X, X, X, X, X, X, X},
                          {0, 5, 4, 1, 5, 0, X, X, X, X, X, X, X, X, X, X},
                          {8, 5, 4, 8, 3, 5, 3, 1, 5, X, X, X, X, X, X, X},
                          {1, 2, 10, 9, 5, 4, X, X, X, X, X, X, X, X, X, X},
                          {3, 0, 8, 1, 2, 10, 4, 9, 5, X, X, X, X, X, X, X},
                          {5, 2, 10, 5, 4, 2, 4, 0, 2, X, X, X, X, X, X, X},
                          {2, 10, 5, 3, 2, 5, 3, 5, 4, 3, 4, 8, X, X, X, X},
                          {9, 5, 4, 2, 3, 11, X, X, X, X, X, X, X, X, X, X},
                          {0, 11, 2, 0, 8, 11, 4, 9, 5, X, X, X, X, X, X, X},
                          {0, 5, 4, 0, 1, 5, 2, 3, 11, X, X, X, X, X, X, X},
                          {2, 1, 5, 2, 5, 8, 2, 8, 11, 4, 8, 5, X, X, X, X},
                          {10, 3, 11, 10, 1, 3, 9, 5, 4, X, X, X, X, X, X, X},
                          {4, 9, 5, 0, 8, 1, 8, 10, 1, 8, 11, 10, X, X, X, X},
                          {5, 4, 0, 5, 0, 11, 5, 11, 10, 11, 0, 3, X, X, X, X},
                          {5, 4, 8, 5, 8, 10, 10, 8, 11, X, X, X, X, X, X, X},
                          {9, 7, 8, 5, 7, 9, X, X, X, X, X, X, X, X, X, X},
                          {9, 3, 0, 9, 5, 3, 5, 7, 3, X, X, X, X, X, X, X},
                          {0, 7, 8, 0, 1, 7, 1, 5, 7, X, X, X, X, X, X, X},
                          {1, 5, 3, 3, 5, 7, X, X, X, X, X, X, X, X, X, X},
                          {9, 7, 8, 9, 5, 7, 10, 1, 2, X, X, X, X, X, X, X},
                          {10, 1, 2, 9, 5, 0, 5, 3, 0, 5, 7, 3, X, X, X, X},
                          {8, 0, 2, 8, 2, 5, 8, 5, 7, 10, 5, 2, X, X, X, X},
                          {2, 10, 5, 2, 5, 3, 3, 5, 7, X, X, X, X, X, X, X},
                          {7, 9, 5, 7, 8, 9, 3, 11, 2, X, X, X, X, X, X, X},
                          {9, 5, 7, 9, 7, 2, 9, 2, 0, 2, 7, 11, X, X, X, X},
                          {2, 3, 11, 0, 1, 8, 1, 7, 8, 1, 5, 7, X, X, X, X},
                          {11, 2, 1, 11, 1, 7, 7, 1, 5, X, X, X, X, X, X, X},
                          {9, 5, 8, 8, 5, 7, 10, 1, 3, 10, 3, 11, X, X, X, X},
                          {5, 7, 0, 5, 0, 9, 7, 11, 0, 1, 0, 10, 11, 10, 0, X},
                          {11, 10, 0, 11, 0, 3, 10, 5, 0, 8, 0, 7, 5, 7, 0, X},
                          {11, 10, 5, 7, 11, 5, X, X, X, X, X, X, X, X, X, X},
                          {10, 6, 5, X, X, X, X, X, X, X, X, X, X, X, X, X},
                          {0, 8, 3, 5, 10, 6, X, X, X, X, X, X, X, X, X, X},
                          {9, 0, 1, 5, 10, 6, X, X, X, X, X, X, X, X, X, X},
                          {1, 8, 3, 1, 9, 8, 5, 10, 6, X, X, X, X, X, X, X},
                          {1, 6, 5, 2, 6, 1, X, X, X, X, X, X, X, X, X, X},
                          {1, 6, 5, 1, 2, 6, 3, 0, 8, X, X, X, X, X, X, X},
                          {9, 6, 5, 9, 0, 6, 0, 2, 6, X, X, X, X, X, X, X},
                          {5, 9, 8, 5, 8, 2, 5, 2, 6, 3, 2, 8, X, X, X, X},
                          {2, 3, 11, 10, 6, 5, X, X, X, X, X, X, X, X, X, X},
                          {11, 0, 8, 11, 2, 0, 10, 6, 5, X, X, X, X, X, X, X},
                          {0, 1, 9, 2, 3, 11, 5, 10, 6, X, X, X, X, X, X, X},
                          {5, 10, 6, 1, 9, 2, 9, 11, 2, 9, 8, 11, X, X, X, X},
                          {6, 3, 11, 6, 5, 3, 5, 1, 3, X, X, X, X, X, X, X},
                          {0, 8, 11, 0, 11, 5, 0, 5, 1, 5, 11, 6, X, X, X, X},
                          {3, 11, 6, 0, 3, 6, 0, 6, 5, 0, 5, 9, X, X, X, X},
                          {6, 5, 9, 6, 9, 11, 11, 9, 8, X, X, X, X, X, X, X},
                          {5, 10, 6, 4, 7, 8, X, X, X, X, X, X, X, X, X, X},
                          {4, 3, 0, 4, 7, 3, 6, 5, 10, X, X, X, X, X, X, X},
                          {1, 9, 0, 5, 10, 6, 8, 4, 7, X, X, X, X, X, X, X},
                          {10, 6, 5, 1, 9, 7, 1, 7, 3, 7, 9, 4, X, X, X, X},
                          {6, 1, 2, 6, 5, 1, 4, 7, 8, X, X, X, X, X, X, X},
                          {1, 2, 5, 5, 2, 6, 3, 0, 4, 3, 4, 7, X, X, X, X},
                          {8, 4, 7, 9, 0, 5, 0, 6, 5, 0, 2, 6, X, X, X, X},
                          {7, 3, 9, 7, 9, 4, 3, 2, 9, 5, 9, 6, 2, 6, 9, X},
                          {3, 11, 2, 7, 8, 4, 10, 6, 5, X, X, X, X, X, X, X},
                          {5, 10, 6, 4, 7, 2, 4, 2, 0, 2, 7, 11, X, X, X, X},
                          {0, 1, 9, 4, 7, 8, 2, 3, 11, 5, 10, 6, X, X, X, X},
                          {9, 2, 1, 9, 11, 2, 9, 4, 11, 7, 11, 4, 5, 10, 6, X},
                          {8, 4, 7, 3, 11, 5, 3, 5, 1, 5, 11, 6, X, X, X, X},
                          {5, 1, 11, 5, 11, 6, 1, 0, 11, 7, 11, 4, 0, 4, 11, X},
                          {0, 5, 9, 0, 6, 5, 0, 3, 6, 11, 6, 3, 8, 4, 7, X},
                          {6, 5, 9, 6, 9, 11, 4, 7, 9, 7, 11, 9, X, X, X, X},
                          {10, 4, 9, 6, 4, 10, X, X, X, X, X, X, X, X, X, X},
                          {4, 10, 6, 4, 9, 10, 0, 8, 3, X, X, X, X, X, X, X},
                          {10, 0, 1, 10, 6, 0, 6, 4, 0, X, X, X, X, X, X, X},
                          {8, 3, 1, 8, 1, 6, 8, 6, 4, 6, 1, 10, X, X, X, X},
                          {1, 4, 9, 1, 2, 4, 2, 6, 4, X, X, X, X, X, X, X},
                          {3, 0, 8, 1, 2, 9, 2, 4, 9, 2, 6, 4, X, X, X, X},
                          {0, 2, 4, 4, 2, 6, X, X, X, X, X, X, X, X, X, X},
                          {8, 3, 2, 8, 2, 4, 4, 2, 6, X, X, X, X, X, X, X},
                          {10, 4, 9, 10, 6, 4, 11, 2, 3, X, X, X, X, X, X, X},
                          {0, 8, 2, 2, 8, 11, 4, 9, 10, 4, 10, 6, X, X, X, X},
                          {3, 11, 2, 0, 1, 6, 0, 6, 4, 6, 1, 10, X, X, X, X},
                          {6, 4, 1, 6, 1, 10, 4, 8, 1, 2, 1, 11, 8, 11, 1, X},
                          {9, 6, 4, 9, 3, 6, 9, 1, 3, 11, 6, 3, X, X, X, X},
                          {8, 11, 1, 8, 1, 0, 11, 6, 1, 9, 1, 4, 6, 4, 1, X},
                          {3, 11, 6, 3, 6, 0, 0, 6, 4, X, X, X, X, X, X, X},
                          {6, 4, 8, 11, 6, 8, X, X, X, X, X, X, X, X, X, X},
                          {7, 10, 6, 7, 8, 10, 8, 9, 10, X, X, X, X, X, X, X},
                          {0, 7, 3, 0, 10, 7, 0, 9, 10, 6, 7, 10, X, X, X, X},
                          {10, 6, 7, 1, 10, 7, 1, 7, 8, 1, 8, 0, X, X, X, X},
                          {10, 6, 7, 10, 7, 1, 1, 7, 3, X, X, X, X, X, X, X},
                          {1, 2, 6, 1, 6, 8, 1, 8, 9, 8, 6, 7, X, X, X, X},
                          {2, 6, 9, 2, 9, 1, 6, 7, 9, 0, 9, 3, 7, 3, 9, X},
                          {7, 8, 0, 7, 0, 6, 6, 0, 2, X, X, X, X, X, X, X},
                          {7, 3, 2, 6, 7, 2, X, X, X, X, X, X, X, X, X, X},
                          {2, 3, 11, 10, 6, 8, 10, 8, 9, 8, 6, 7, X, X, X, X},
                          {2, 0, 7, 2, 7, 11, 0, 9, 7, 6, 7, 10, 9, 10, 7, X},
                          {1, 8, 0, 1, 7, 8, 1, 10, 7, 6, 7, 10, 2, 3, 11, X},
                          {11, 2, 1, 11, 1, 7, 10, 6, 1, 6, 7, 1, X, X, X, X},
                          {8, 9, 6, 8, 6, 7, 9, 1, 6, 11, 6, 3, 1, 3, 6, X},
                          {0, 9, 1, 11, 6, 7, X, X, X, X, X, X, X, X, X, X},
                          {7, 8, 0, 7, 0, 6, 3, 11, 0, 11, 6, 0, X, X, X, X},
                          {7, 11, 6, X, X, X, X, X, X, X, X, X, X, X, X, X},
                          {7, 6, 11, X, X, X, X, X, X, X, X, X, X, X, X, X},
                          {3, 0, 8, 11, 7, 6, X, X, X, X, X, X, X, X, X, X},
                          {0, 1, 9, 11, 7, 6, X, X, X, X, X, X, X, X, X, X},
                          {8, 1, 9, 8, 3, 1, 11, 7, 6, X, X, X, X, X, X, X},
                          {10, 1, 2, 6, 11, 7, X, X, X, X, X, X, X, X, X, X},
                          {1, 2, 10, 3, 0, 8, 6, 11, 7, X, X, X, X, X, X, X},
                          {2, 9, 0, 2, 10, 9, 6, 11, 7, X, X, X, X, X, X, X},
                          {6, 11, 7, 2, 10, 3, 10, 8, 3, 10, 9, 8, X, X, X, X},
                          {7, 2, 3, 6, 2, 7, X, X, X, X, X, X, X, X, X, X},
                          {7, 0, 8, 7, 6, 0, 6, 2, 0, X, X, X, X, X, X, X},
                          {2, 7, 6, 2, 3, 7, 0, 1, 9, X, X, X, X, X, X, X},
                          {1, 6, 2, 1, 8, 6, 1, 9, 8, 8, 7, 6, X, X, X, X},
                          {10, 7, 6, 10, 1, 7, 1, 3, 7, X, X, X, X, X, X, X},
                          {10, 7, 6, 1, 7, 10, 1, 8, 7, 1, 0, 8, X, X, X, X},
                          {0, 3, 7, 0, 7, 10, 0, 10, 9, 6, 10, 7, X, X, X, X},
                          {7, 6, 10, 7, 10, 8, 8, 10, 9, X, X, X, X, X, X, X},
                          {6, 8, 4, 11, 8, 6, X, X, X, X, X, X, X, X, X, X},
                          {3, 6, 11, 3, 0, 6, 0, 4, 6, X, X, X, X, X, X, X},
                          {8, 6, 11, 8, 4, 6, 9, 0, 1, X, X, X, X, X, X, X},
                          {9, 4, 6, 9, 6, 3, 9, 3, 1, 11, 3, 6, X, X, X, X},
                          {6, 8, 4, 6, 11, 8, 2, 10, 1, X, X, X, X, X, X, X},
                          {1, 2, 10, 3, 0, 11, 0, 6, 11, 0, 4, 6, X, X, X, X},
                          {4, 11, 8, 4, 6, 11, 0, 2, 9, 2, 10, 9, X, X, X, X},
                          {10, 9, 3, 10, 3, 2, 9, 4, 3, 11, 3, 6, 4, 6, 3, X},
                          {8, 2, 3, 8, 4, 2, 4, 6, 2, X, X, X, X, X, X, X},
                          {0, 4, 2, 4, 6, 2, X, X, X, X, X, X, X, X, X, X},
                          {1, 9, 0, 2, 3, 4, 2, 4, 6, 4, 3, 8, X, X, X, X},
                          {1, 9, 4, 1, 4, 2, 2, 4, 6, X, X, X, X, X, X, X},
                          {8, 1, 3, 8, 6, 1, 8, 4, 6, 6, 10, 1, X, X, X, X},
                          {10, 1, 0, 10, 0, 6, 6, 0, 4, X, X, X, X, X, X, X},
                          {4, 6, 3, 4, 3, 8, 6, 10, 3, 0, 3, 9, 10, 9, 3, X},
                          {10, 9, 4, 6, 10, 4, X, X, X, X, X, X, X, X, X, X},
                          {4, 9, 5, 7, 6, 11, X, X, X, X, X, X, X, X, X, X},
                          {0, 8, 3, 4, 9, 5, 11, 7, 6, X, X, X, X, X, X, X},
                          {5, 0, 1, 5, 4, 0, 7, 6, 11, X, X, X, X, X, X, X},
                          {11, 7, 6, 8, 3, 4, 3, 5, 4, 3, 1, 5, X, X, X, X},
                          {9, 5, 4, 10, 1, 2, 7, 6, 11, X, X, X, X, X, X, X},
                          {6, 11, 7, 1, 2, 10, 0, 8, 3, 4, 9, 5, X, X, X, X},
                          {7, 6, 11, 5, 4, 10, 4, 2, 10, 4, 0, 2, X, X, X, X},
                          {3, 4, 8, 3, 5, 4, 3, 2, 5, 10, 5, 2, 11, 7, 6, X},
                          {7, 2, 3, 7, 6, 2, 5, 4, 9, X, X, X, X, X, X, X},
                          {9, 5, 4, 0, 8, 6, 0, 6, 2, 6, 8, 7, X, X, X, X},
                          {3, 6, 2, 3, 7, 6, 1, 5, 0, 5, 4, 0, X, X, X, X},
                          {6, 2, 8, 6, 8, 7, 2, 1, 8, 4, 8, 5, 1, 5, 8, X},
                          {9, 5, 4, 10, 1, 6, 1, 7, 6, 1, 3, 7, X, X, X, X},
                          {1, 6, 10, 1, 7, 6, 1, 0, 7, 8, 7, 0, 9, 5, 4, X},
                          {4, 0, 10, 4, 10, 5, 0, 3, 10, 6, 10, 7, 3, 7, 10, X},
                          {7, 6, 10, 7, 10, 8, 5, 4, 10, 4, 8, 10, X, X, X, X},
                          {6, 9, 5, 6, 11, 9, 11, 8, 9, X, X, X, X, X, X, X},
                          {3, 6, 11, 0, 6, 3, 0, 5, 6, 0, 9, 5, X, X, X, X},
                          {0, 11, 8, 0, 5, 11, 0, 1, 5, 5, 6, 11, X, X, X, X},
                          {6, 11, 3, 6, 3, 5, 5, 3, 1, X, X, X, X, X, X, X},
                          {1, 2, 10, 9, 5, 11, 9, 11, 8, 11, 5, 6, X, X, X, X},
                          {0, 11, 3, 0, 6, 11, 0, 9, 6, 5, 6, 9, 1, 2, 10, X},
                          {11, 8, 5, 11, 5, 6, 8, 0, 5, 10, 5, 2, 0, 2, 5, X},
                          {6, 11, 3, 6, 3, 5, 2, 10, 3, 10, 5, 3, X, X, X, X},
                          {5, 8, 9, 5, 2, 8, 5, 6, 2, 3, 8, 2, X, X, X, X},
                          {9, 5, 6, 9, 6, 0, 0, 6, 2, X, X, X, X, X, X, X},
                          {1, 5, 8, 1, 8, 0, 5, 6, 8, 3, 8, 2, 6, 2, 8, X},
                          {1, 5, 6, 2, 1, 6, X, X, X, X, X, X, X, X, X, X},
                          {1, 3, 6, 1, 6, 10, 3, 8, 6, 5, 6, 9, 8, 9, 6, X},
                          {10, 1, 0, 10, 0, 6, 9, 5, 0, 5, 6, 0, X, X, X, X},
                          {0, 3, 8, 5, 6, 10, X, X, X, X, X, X, X, X, X, X},
                          {10, 5, 6, X, X, X, X, X, X, X, X, X, X, X, X, X},
                          {11, 5, 10, 7, 5, 11, X, X, X, X, X, X, X, X, X, X},
                          {11, 5, 10, 11, 7, 5, 8, 3, 0, X, X, X, X, X, X, X},
                          {5, 11, 7, 5, 10, 11, 1, 9, 0, X, X, X, X, X, X, X},
                          {10, 7, 5, 10, 11, 7, 9, 8, 1, 8, 3, 1, X, X, X, X},
                          {11, 1, 2, 11, 7, 1, 7, 5, 1, X, X, X, X, X, X, X},
                          {0, 8, 3, 1, 2, 7, 1, 7, 5, 7, 2, 11, X, X, X, X},
                          {9, 7, 5, 9, 2, 7, 9, 0, 2, 2, 11, 7, X, X, X, X},
                          {7, 5, 2, 7, 2, 11, 5, 9, 2, 3, 2, 8, 9, 8, 2, X},
                          {2, 5, 10, 2, 3, 5, 3, 7, 5, X, X, X, X, X, X, X},
                          {8, 2, 0, 8, 5, 2, 8, 7, 5, 10, 2, 5, X, X, X, X},
                          {9, 0, 1, 5, 10, 3, 5, 3, 7, 3, 10, 2, X, X, X, X},
                          {9, 8, 2, 9, 2, 1, 8, 7, 2, 10, 2, 5, 7, 5, 2, X},
                          {1, 3, 5, 3, 7, 5, X, X, X, X, X, X, X, X, X, X},
                          {0, 8, 7, 0, 7, 1, 1, 7, 5, X, X, X, X, X, X, X},
                          {9, 0, 3, 9, 3, 5, 5, 3, 7, X, X, X, X, X, X, X},
                          {9, 8, 7, 5, 9, 7, X, X, X, X, X, X, X, X, X, X},
                          {5, 8, 4, 5, 10, 8, 10, 11, 8, X, X, X, X, X, X, X},
                          {5, 0, 4, 5, 11, 0, 5, 10, 11, 11, 3, 0, X, X, X, X},
                          {0, 1, 9, 8, 4, 10, 8, 10, 11, 10, 4, 5, X, X, X, X},
                          {10, 11, 4, 10, 4, 5, 11, 3, 4, 9, 4, 1, 3, 1, 4, X},
                          {2, 5, 1, 2, 8, 5, 2, 11, 8, 4, 5, 8, X, X, X, X},
                          {0, 4, 11, 0, 11, 3, 4, 5, 11, 2, 11, 1, 5, 1, 11, X},
                          {0, 2, 5, 0, 5, 9, 2, 11, 5, 4, 5, 8, 11, 8, 5, X},
                          {9, 4, 5, 2, 11, 3, X, X, X, X, X, X, X, X, X, X},
                          {2, 5, 10, 3, 5, 2, 3, 4, 5, 3, 8, 4, X, X, X, X},
                          {5, 10, 2, 5, 2, 4, 4, 2, 0, X, X, X, X, X, X, X},
                          {3, 10, 2, 3, 5, 10, 3, 8, 5, 4, 5, 8, 0, 1, 9, X},
                          {5, 10, 2, 5, 2, 4, 1, 9, 2, 9, 4, 2, X, X, X, X},
                          {8, 4, 5, 8, 5, 3, 3, 5, 1, X, X, X, X, X, X, X},
                          {0, 4, 5, 1, 0, 5, X, X, X, X, X, X, X, X, X, X},
                          {8, 4, 5, 8, 5, 3, 9, 0, 5, 0, 3, 5, X, X, X, X},
                          {9, 4, 5, X, X, X, X, X, X, X, X, X, X, X, X, X},
                          {4, 11, 7, 4, 9, 11, 9, 10, 11, X, X, X, X, X, X, X},
                          {0, 8, 3, 4, 9, 7, 9, 11, 7, 9, 10, 11, X, X, X, X},
                          {1, 10, 11, 1, 11, 4, 1, 4, 0, 7, 4, 11, X, X, X, X},
                          {3, 1, 4, 3, 4, 8, 1, 10, 4, 7, 4, 11, 10, 11, 4, X},
                          {4, 11, 7, 9, 11, 4, 9, 2, 11, 9, 1, 2, X, X, X, X},
                          {9, 7, 4, 9, 11, 7, 9, 1, 11, 2, 11, 1, 0, 8, 3, X},
                          {11, 7, 4, 11, 4, 2, 2, 4, 0, X, X, X, X, X, X, X},
                          {11, 7, 4, 11, 4, 2, 8, 3, 4, 3, 2, 4, X, X, X, X},
                          {2, 9, 10, 2, 7, 9, 2, 3, 7, 7, 4, 9, X, X, X, X},
                          {9, 10, 7, 9, 7, 4, 10, 2, 7, 8, 7, 0, 2, 0, 7, X},
                          {3, 7, 10, 3, 10, 2, 7, 4, 10, 1, 10, 0, 4, 0, 10, X},
                          {1, 10, 2, 8, 7, 4, X, X, X, X, X, X, X, X, X, X},
                          {4, 9, 1, 4, 1, 7, 7, 1, 3, X, X, X, X, X, X, X},
                          {4, 9, 1, 4, 1, 7, 0, 8, 1, 8, 7, 1, X, X, X, X},
                          {4, 0, 3, 7, 4, 3, X, X, X, X, X, X, X, X, X, X},
                          {4, 8, 7, X, X, X, X, X, X, X, X, X, X, X, X, X},
                          {9, 10, 8, 10, 11, 8, X, X, X, X, X, X, X, X, X, X},
                          {3, 0, 9, 3, 9, 11, 11, 9, 10, X, X, X, X, X, X, X},
                          {0, 1, 10, 0, 10, 8, 8, 10, 11, X, X, X, X, X, X, X},
                          {3, 1, 10, 11, 3, 10, X, X, X, X, X, X, X, X, X, X},
                          {1, 2, 11, 1, 11, 9, 9, 11, 8, X, X, X, X, X, X, X},
                          {3, 0, 9, 3, 9, 11, 1, 2, 9, 2, 11, 9, X, X, X, X},
                          {0, 2, 11, 8, 0, 11, X, X, X, X, X, X, X, X, X, X},
                          {3, 2, 11, X, X, X, X, X, X, X, X, X, X, X, X, X},
                          {2, 3, 8, 2, 8, 10, 10, 8, 9, X, X, X, X, X, X, X},
                          {9, 10, 2, 0, 9, 2, X, X, X, X, X, X, X, X, X, X},
                          {2, 3, 8, 2, 8, 10, 0, 1, 8, 1, 10, 8, X, X, X, X},
                          {1, 10, 2, X, X, X, X, X, X, X, X, X, X, X, X, X},
                          {1, 3, 8, 9, 1, 8, X, X, X, X, X, X, X, X, X, X},
                          {0, 9, 1, X, X, X, X, X, X, X, X, X, X, X, X, X},
                          {0, 3, 8, X, X, X, X, X, X, X, X, X, X, X, X, X},
                          {X, X, X, X, X, X, X, X, X, X, X, X, X, X, X, X}};
#undef X

// number of vertices for each case above
uint numVertsTable[256] = {
    0,  3,  3,  6,  3,  6,  6,  9,  3,  6,  6,  9,  6,  9,  9,  6,  3,  6,  6,
    9,  6,  9,  9,  12, 6,  9,  9,  12, 9,  12, 12, 9,  3,  6,  6,  9,  6,  9,
    9,  12, 6,  9,  9,  12, 9,  12, 12, 9,  6,  9,  9,  6,  9,  12, 12, 9,  9,
    12, 12, 9,  12, 15, 15, 6,  3,  6,  6,  9,  6,  9,  9,  12, 6,  9,  9,  12,
    9,  12, 12, 9,  6,  9,  9,  12, 9,  12, 12, 15, 9,  12, 12, 15, 12, 15, 15,
    12, 6,  9,  9,  12, 9,  12, 6,  9,  9,  12, 12, 15, 12, 15, 9,  6,  9,  12,
    12, 9,  12, 15, 9,  6,  12, 15, 15, 12, 15, 6,  12, 3,  3,  6,  6,  9,  6,
    9,  9,  12, 6,  9,  9,  12, 9,  12, 12, 9,  6,  9,  9,  12, 9,  12, 12, 15,
    9,  6,  12, 9,  12, 9,  15, 6,  6,  9,  9,  12, 9,  12, 12, 15, 9,  12, 12,
    15, 12, 15, 15, 12, 9,  12, 12, 9,  12, 15, 15, 12, 12, 9,  15, 6,  15, 12,
    6,  3,  6,  9,  9,  12, 9,  12, 12, 15, 9,  12, 12, 15, 6,  9,  9,  6,  9,
    12, 12, 15, 12, 15, 15, 6,  12, 9,  15, 12, 9,  6,  12, 3,  9,  12, 12, 15,
    12, 15, 9,  12, 12, 15, 15, 6,  9,  12, 6,  3,  6,  9,  9,  6,  9,  12, 6,
    3,  9,  6,  12, 3,  6,  3,  3,  0,
};
