# Supplementary material
Source: ML conference proceedings conference paper supplement (https://openaccess.thecvf.com/content/WACV2023/html/Plack_Fast_Differentiable_Transient_WACV_2023_paper.html)
Supplement: Supplementary file 2 [file Plack_Fast_Differentiable_Transient_WACV_2023_supplemental.zip › code/samples/wacv/mannequin/mannequin_synthetic.py]

"""Optimize Rbf for a synthetic mannequin"""
import time
import torch
from totri.types import VolumeDef
from torchvision.utils import save_image
from totri.data import VeltenNc2012, repo_path, load_sample_mesh
from totri.util import datetime_str
from totri.fitting.rbf import GaussianRbfBase, RbfFitting
from totri.fitting.background import TransientBackgroundExhaustive
from totri.render import MeshRenderExhaustive
from totri.util.render import UnitCubeMeshRender

def make_data():
    file_name = repo_path('data/veltennc2012/gandalf/dataset_Gandalf.mat')
    ds = VeltenNc2012(file_name, device='cuda')

    # Crop measurement
    scan_start = 40
    scan_end = scan_start + 224
    ds.transient   = ds.transient[:,:,scan_start:scan_end,:]
    ds.scan_points = ds.scan_points[:,scan_start:scan_end,:]

    ds.volume_def.start = (-0.75, 0.0, 1.25)
    ds.volume_def.end   = ( 0.75, 3.0, 2.75)
    ds.volume_def.resolution = (32, 64, 32)

    # Render synthetic
    verts_gt, faces_gt = load_sample_mesh('mannequin', 'cuda')
    transient = MeshRenderExhaustive.apply(
        verts_gt, faces_gt,
        ds.scan_points,
        ds.laser_points,
        ds.bin_def,
        None,
        ds.scan_origin,
        ds.laser_origin)

    # Optimize
    print('Start fitting')
    tic = time.perf_counter()
    base = RbfFitting(
        ds.bin_def,
        ds.scan_points[0],
        ds.laser_points[0],
        ds.scan_origin,
        ds.laser_origin,
        optimize_check_delete=True,
        delete_Factor=1.002,
        tensorboard=False,
        video=False,
        log_dir=repo_path(f'samples/wacv/mannequin/synthetic/{datetime_str()}')
    ).fit(
        GaussianRbfBase(
            ds.volume_def,
            has_color=False,
            sigma_init=0.1,
            sigma_min=0.01),
        transient[0],
        verts_input=verts_gt[0],
        faces_input=faces_gt[0],
        subdivide_at=[53],
        num_iter=60,
    )
    toc = time.perf_counter()
    verts = base.make_verts()

    torch.save({
        'verts': verts.detach().cpu(),
        'verts_gt': verts_gt.detach().cpu(),
        'faces_gt': faces_gt.detach().cpu(),
        'time_s': toc - tic,
        }, repo_path(f'samples/wacv/mannequin/synthetic/data.pth'))

def make_figures():
    data = torch.load(repo_path(f'samples/wacv/mannequin/synthetic/data.pth'))
    verts = data['verts'].cuda()
    verts_gt = data['verts_gt'].cuda()
    faces_gt = data['faces_gt'].cuda()
    time_s = data['time_s']

    print(f'Runtime: {time_s}s')

    volume_def = VolumeDef(
        (-0.75, 0.0, 1.25),
        ( 0.75, 3.0, 2.75),
        (24, 48, 24),)
    img = UnitCubeMeshRender(4096, distance=0.07, specular=0).apply(verts, volume_def=volume_def)
    img = img[:,600:-400,500:-500]
    save_image(img, repo_path(f'samples/wacv/mannequin/synthetic/mannequinf_synthetic_rbf.jpg'))
    img = UnitCubeMeshRender(4096, distance=0.07, specular=0).apply(verts_gt[0], faces_gt[0], volume_def=volume_def)
    img = img[:,600:-400,500:-500]
    save_image(img, repo_path(f'samples/wacv/mannequin/synthetic/mannequin_synthetic_gt.jpg'))

make_data()
make_figures()
