# Supplementary material
Source: ML conference proceedings conference paper supplement (https://openaccess.thecvf.com/content/WACV2023/html/Plack_Fast_Differentiable_Transient_WACV_2023_paper.html)
Supplement: Supplementary file 2 [file Plack_Fast_Differentiable_Transient_WACV_2023_supplemental.zip › code/samples/wacv/self_supervised/a.obj]

# Blender v3.2.1 OBJ File: 'untitled.blend'
# www.blender.org
v 0.268790 -0.279648 0.348940
v 0.273025 -0.282400 0.340394
v 0.260651 -0.279877 0.349283
v 0.260651 -0.283545 0.341705
v 0.275496 -0.284407 0.328602
v 0.275674 -0.284733 0.315500
v 0.260651 -0.287016 0.328602
v 0.260651 -0.287504 0.315500
v 0.247549 -0.279877 0.349283
v 0.247549 -0.283545 0.341705
v 0.234446 -0.279877 0.349283
v 0.234446 -0.283545 0.341705
v 0.247549 -0.287016 0.328602
v 0.247549 -0.287504 0.315500
v 0.234446 -0.287016 0.328602
v 0.234446 -0.287504 0.315500
v 0.268790 -0.275472 0.348940
v 0.271535 -0.271719 0.342786
v 0.268629 -0.259537 0.338208
v 0.261795 -0.271719 0.350746
v 0.266925 -0.266737 0.347874
v 0.258836 -0.259537 0.351651
v 0.265387 -0.259537 0.344759
v 0.276184 -0.272639 0.328602
v 0.276716 -0.272639 0.315500
v 0.270588 -0.259537 0.328602
v 0.271120 -0.259537 0.315500
v 0.267221 -0.252942 0.335240
v 0.256038 -0.246435 0.349936
v 0.262404 -0.247718 0.340446
v 0.254459 -0.239042 0.348751
v 0.256221 -0.234138 0.341771
v 0.267496 -0.252297 0.328602
v 0.267762 -0.251675 0.315500
v 0.264698 -0.245746 0.328602
v 0.264964 -0.245124 0.315500
v 0.259396 -0.233332 0.328602
v 0.259928 -0.233332 0.315500
v 0.247549 -0.272639 0.353614
v 0.247549 -0.259537 0.356326
v 0.234446 -0.272639 0.353773
v 0.234446 -0.259537 0.357767
v 0.247549 -0.246435 0.354540
v 0.247955 -0.234138 0.351574
v 0.252594 -0.230307 0.346182
v 0.234446 -0.246435 0.358043
v 0.234446 -0.233332 0.357141
v 0.254755 -0.225246 0.337448
v 0.255349 -0.223857 0.328602
v 0.255615 -0.223234 0.315500
v 0.243890 -0.220230 0.350602
v 0.250447 -0.220619 0.341771
v 0.241993 -0.211347 0.349247
v 0.244265 -0.207039 0.342297
v 0.234446 -0.220230 0.355380
v 0.235235 -0.207039 0.352176
v 0.240128 -0.202612 0.347059
v 0.252551 -0.217306 0.328602
v 0.252817 -0.216683 0.315500
v 0.248204 -0.207128 0.328602
v 0.248735 -0.207128 0.315500
v 0.242289 -0.197551 0.338324
v 0.231743 -0.194025 0.351188
v 0.238491 -0.193520 0.342297
v 0.229528 -0.183652 0.349638
v 0.232309 -0.179939 0.342823
v 0.243202 -0.195416 0.328602
v 0.243467 -0.194794 0.315500
v 0.240403 -0.188865 0.328602
v 0.240669 -0.188242 0.315500
v 0.237011 -0.180923 0.328602
v 0.237543 -0.180923 0.315500
v 0.229389 -0.167821 0.338408
v 0.227959 -0.161121 0.335446
v 0.231415 -0.167821 0.328602
v 0.231947 -0.167821 0.315500
v 0.228256 -0.160424 0.328602
v 0.228522 -0.159802 0.315500
v 0.221344 -0.279877 0.349283
v 0.221344 -0.283545 0.341705
v 0.208242 -0.279877 0.349283
v 0.208242 -0.283545 0.341705
v 0.221344 -0.287016 0.328602
v 0.221344 -0.287504 0.315500
v 0.208242 -0.287016 0.328602
v 0.208242 -0.287504 0.315500
v 0.195139 -0.279877 0.349283
v 0.195139 -0.283545 0.341705
v 0.182037 -0.279877 0.349283
v 0.182037 -0.283545 0.341705
v 0.195139 -0.287016 0.328602
v 0.195139 -0.287504 0.315500
v 0.182037 -0.287016 0.328602
v 0.182037 -0.287504 0.315500
v 0.221344 -0.272639 0.353773
v 0.221344 -0.259537 0.357930
v 0.208242 -0.272639 0.353773
v 0.208242 -0.259537 0.357930
v 0.221344 -0.246435 0.358623
v 0.221344 -0.233332 0.358548
v 0.208242 -0.246435 0.358623
v 0.208242 -0.233332 0.358623
v 0.195139 -0.272639 0.353773
v 0.195139 -0.259537 0.357930
v 0.182037 -0.272639 0.353773
v 0.182037 -0.259537 0.357930
v 0.195139 -0.246435 0.358623
v 0.195139 -0.233332 0.358623
v 0.182037 -0.246435 0.358623
v 0.182037 -0.233332 0.358623
v 0.168935 -0.279877 0.349283
v 0.168935 -0.283545 0.341705
v 0.159716 -0.279648 0.348940
v 0.155542 -0.281581 0.341611
v 0.168935 -0.287016 0.328602
v 0.168935 -0.287504 0.315500
v 0.155832 -0.285345 0.328602
v 0.155832 -0.286211 0.315500
v 0.148819 -0.280271 0.337182
v 0.148322 -0.281433 0.328602
v 0.148056 -0.282054 0.315500
v 0.168935 -0.272639 0.353675
v 0.168935 -0.259537 0.357644
v 0.155542 -0.271565 0.350524
v 0.150981 -0.275217 0.345916
v 0.155832 -0.259537 0.354204
v 0.168935 -0.246435 0.358435
v 0.168935 -0.233332 0.358623
v 0.155832 -0.246435 0.356535
v 0.155832 -0.233332 0.357818
v 0.149112 -0.266482 0.348488
v 0.147504 -0.271565 0.341611
v 0.147627 -0.259537 0.349652
v 0.142729 -0.259537 0.341705
v 0.144559 -0.272639 0.328602
v 0.144028 -0.272639 0.315500
v 0.138510 -0.258489 0.329447
v 0.138702 -0.260191 0.315500
v 0.135992 -0.253422 0.325643
v 0.135899 -0.253640 0.315500
v 0.144824 -0.246435 0.351539
v 0.137954 -0.247510 0.342634
v 0.141697 -0.233995 0.352504
v 0.136640 -0.238805 0.347621
v 0.134478 -0.243859 0.338886
v 0.134772 -0.230070 0.349499
v 0.132172 -0.233995 0.342634
v 0.136347 -0.252594 0.334378
v 0.133813 -0.247510 0.329447
v 0.132816 -0.246435 0.315500
v 0.127741 -0.233332 0.328602
v 0.127210 -0.233332 0.315500
v 0.221344 -0.220230 0.358218
v 0.221344 -0.207128 0.357597
v 0.208242 -0.220230 0.358623
v 0.208242 -0.207128 0.358623
v 0.221344 -0.194025 0.356128
v 0.222515 -0.179939 0.352638
v 0.227662 -0.174917 0.347935
v 0.208242 -0.194025 0.358380
v 0.208242 -0.180923 0.357880
v 0.195139 -0.220230 0.358623
v 0.195139 -0.207128 0.358623
v 0.182037 -0.220230 0.358623
v 0.182037 -0.207128 0.358623
v 0.195139 -0.194025 0.358623
v 0.195139 -0.180923 0.358623
v 0.182037 -0.194025 0.358623
v 0.182037 -0.180923 0.358623
v 0.219596 -0.167821 0.351678
v 0.226147 -0.167821 0.344960
v 0.216798 -0.154718 0.350003
v 0.223177 -0.155939 0.340570
v 0.208242 -0.167821 0.356706
v 0.208242 -0.154718 0.354618
v 0.225458 -0.153873 0.328602
v 0.225724 -0.153251 0.315500
v 0.215197 -0.147221 0.348812
v 0.216995 -0.142358 0.341808
v 0.215493 -0.133426 0.337509
v 0.208675 -0.142358 0.351632
v 0.213331 -0.138487 0.346244
v 0.204650 -0.128514 0.350643
v 0.211221 -0.128840 0.341808
v 0.220223 -0.141616 0.328602
v 0.220754 -0.141616 0.315500
v 0.216109 -0.131984 0.328602
v 0.216375 -0.131361 0.315500
v 0.213311 -0.125432 0.328602
v 0.213577 -0.124810 0.315500
v 0.195139 -0.167821 0.358467
v 0.195139 -0.154718 0.358055
v 0.182037 -0.167821 0.358623
v 0.182037 -0.154718 0.358623
v 0.195139 -0.141616 0.357174
v 0.195139 -0.128514 0.355433
v 0.182037 -0.141616 0.358555
v 0.182037 -0.128514 0.358230
v 0.168935 -0.220230 0.358623
v 0.168935 -0.207128 0.358623
v 0.155832 -0.220230 0.358331
v 0.155832 -0.207128 0.358605
v 0.168935 -0.194025 0.358623
v 0.168935 -0.180923 0.358623
v 0.155832 -0.194025 0.358623
v 0.155832 -0.180923 0.358623
v 0.142730 -0.220230 0.355873
v 0.142730 -0.207128 0.357446
v 0.132666 -0.220230 0.350982
v 0.125986 -0.220421 0.342114
v 0.128972 -0.206907 0.351989
v 0.124168 -0.211127 0.346754
v 0.124008 -0.224605 0.328602
v 0.123742 -0.225226 0.315500
v 0.142730 -0.194025 0.358158
v 0.142730 -0.180923 0.358519
v 0.129628 -0.194025 0.355119
v 0.129628 -0.180923 0.356982
v 0.168935 -0.167821 0.358623
v 0.168935 -0.154718 0.358623
v 0.155832 -0.167821 0.358623
v 0.155832 -0.154718 0.358623
v 0.168935 -0.141616 0.358623
v 0.168935 -0.128514 0.358623
v 0.155832 -0.141616 0.358623
v 0.155832 -0.128514 0.358623
v 0.142730 -0.167821 0.358623
v 0.142730 -0.154718 0.358623
v 0.129628 -0.167821 0.357985
v 0.129628 -0.154718 0.358432
v 0.142730 -0.141616 0.358623
v 0.142730 -0.128514 0.358623
v 0.129628 -0.141616 0.358623
v 0.129628 -0.128514 0.358623
v 0.202731 -0.119526 0.349274
v 0.205038 -0.115260 0.342334
v 0.203027 -0.105730 0.338385
v 0.209030 -0.115411 0.328602
v 0.209562 -0.115411 0.315500
v 0.203961 -0.103543 0.328602
v 0.204227 -0.102920 0.315500
v 0.195955 -0.115260 0.352214
v 0.200866 -0.110791 0.347120
v 0.192503 -0.102309 0.351229
v 0.199264 -0.101741 0.342334
v 0.182037 -0.115411 0.357623
v 0.182037 -0.102309 0.356176
v 0.201163 -0.096992 0.328602
v 0.201429 -0.096369 0.315500
v 0.190265 -0.091831 0.349665
v 0.193082 -0.088161 0.342859
v 0.190149 -0.076104 0.338609
v 0.183234 -0.088161 0.352664
v 0.188400 -0.083096 0.347997
v 0.180356 -0.076104 0.351705
v 0.186907 -0.076104 0.345160
v 0.197838 -0.089206 0.328602
v 0.198370 -0.089206 0.315500
v 0.192242 -0.076104 0.328602
v 0.192774 -0.076104 0.315500
v 0.188696 -0.069300 0.335653
v 0.177558 -0.063002 0.350069
v 0.183950 -0.064160 0.340694
v 0.175934 -0.055401 0.348873
v 0.177768 -0.050580 0.341844
v 0.189016 -0.068551 0.328602
v 0.189282 -0.067929 0.315500
v 0.186218 -0.062000 0.328602
v 0.186484 -0.061378 0.315500
v 0.181050 -0.049899 0.328602
v 0.181581 -0.049899 0.315500
v 0.176230 -0.041605 0.337570
v 0.176869 -0.040111 0.328602
v 0.177134 -0.039488 0.315500
v 0.168935 -0.115411 0.358623
v 0.168935 -0.102309 0.358386
v 0.155832 -0.115411 0.358623
v 0.155832 -0.102309 0.358623
v 0.168935 -0.089206 0.357893
v 0.168935 -0.076104 0.356739
v 0.155832 -0.089206 0.358623
v 0.155832 -0.076104 0.358473
v 0.142730 -0.115411 0.358623
v 0.142730 -0.102309 0.358623
v 0.129628 -0.115411 0.358623
v 0.129628 -0.102309 0.358623
v 0.142730 -0.089206 0.358623
v 0.142730 -0.076104 0.358623
v 0.129628 -0.089206 0.358623
v 0.129628 -0.076104 0.358623
v 0.168935 -0.063002 0.354697
v 0.169395 -0.050580 0.351690
v 0.174069 -0.046666 0.346305
v 0.155832 -0.063002 0.358067
v 0.155832 -0.049899 0.357207
v 0.165410 -0.036797 0.350684
v 0.171994 -0.037061 0.341844
v 0.163469 -0.027705 0.349302
v 0.165812 -0.023481 0.342370
v 0.155832 -0.036797 0.355487
v 0.156674 -0.023481 0.352251
v 0.161603 -0.018970 0.347182
v 0.174071 -0.033559 0.328602
v 0.174336 -0.032937 0.315500
v 0.169857 -0.023695 0.328602
v 0.170389 -0.023695 0.315500
v 0.142730 -0.063002 0.358623
v 0.142730 -0.049899 0.358561
v 0.129628 -0.063002 0.358623
v 0.129628 -0.049899 0.358623
v 0.142730 -0.036797 0.358242
v 0.142730 -0.023695 0.357650
v 0.129628 -0.036797 0.358623
v 0.129628 -0.023695 0.358623
v 0.122006 -0.216181 0.338019
v 0.122299 -0.202392 0.349112
v 0.120204 -0.206907 0.342114
v 0.121204 -0.218054 0.328602
v 0.120939 -0.218675 0.315500
v 0.116529 -0.207128 0.328602
v 0.115998 -0.207128 0.315500
v 0.120509 -0.194025 0.350401
v 0.114018 -0.193333 0.341593
v 0.116248 -0.179819 0.351295
v 0.111696 -0.183450 0.345887
v 0.109533 -0.188504 0.337152
v 0.109827 -0.174715 0.348458
v 0.108236 -0.179819 0.341593
v 0.111850 -0.196191 0.328602
v 0.111584 -0.196813 0.315500
v 0.109047 -0.189640 0.328602
v 0.108781 -0.190262 0.315500
v 0.105317 -0.180923 0.328602
v 0.104786 -0.180923 0.315500
v 0.116525 -0.167821 0.354165
v 0.116525 -0.154718 0.356519
v 0.108352 -0.167821 0.349620
v 0.103487 -0.167821 0.341705
v 0.105549 -0.154718 0.351526
v 0.098686 -0.155763 0.342616
v 0.099242 -0.166742 0.329387
v 0.099427 -0.168399 0.315500
v 0.097061 -0.160827 0.334278
v 0.116525 -0.141616 0.357812
v 0.116525 -0.128514 0.358325
v 0.102402 -0.142249 0.352492
v 0.097355 -0.147038 0.347591
v 0.103423 -0.128514 0.356383
v 0.095192 -0.152092 0.338856
v 0.096707 -0.161655 0.325543
v 0.096624 -0.161848 0.315500
v 0.094545 -0.155763 0.329387
v 0.093573 -0.154718 0.315500
v 0.090321 -0.138210 0.349941
v 0.090623 -0.144588 0.342616
v 0.090321 -0.128514 0.354580
v 0.077218 -0.136498 0.349782
v 0.077218 -0.140913 0.341705
v 0.077218 -0.128514 0.354421
v 0.087536 -0.146275 0.328602
v 0.087270 -0.146520 0.315500
v 0.077218 -0.144384 0.328602
v 0.077218 -0.144872 0.315500
v 0.064116 -0.136498 0.349782
v 0.064116 -0.140913 0.341705
v 0.064116 -0.128514 0.354421
v 0.051013 -0.136498 0.349782
v 0.051013 -0.140913 0.341705
v 0.051013 -0.128514 0.354421
v 0.064116 -0.144384 0.328602
v 0.064116 -0.144872 0.315500
v 0.051013 -0.144384 0.328602
v 0.051013 -0.144872 0.315500
v 0.037911 -0.136498 0.349782
v 0.037911 -0.140913 0.341705
v 0.037911 -0.128514 0.354421
v 0.024809 -0.136498 0.349782
v 0.024809 -0.140913 0.341705
v 0.024809 -0.128514 0.354421
v 0.037911 -0.144384 0.328602
v 0.037911 -0.144872 0.315500
v 0.024809 -0.144384 0.328602
v 0.024809 -0.144872 0.315500
v 0.116525 -0.115411 0.358602
v 0.116525 -0.102309 0.358623
v 0.103423 -0.115411 0.358330
v 0.103423 -0.102309 0.358623
v 0.116525 -0.089206 0.358623
v 0.116525 -0.076104 0.358623
v 0.103423 -0.089206 0.358623
v 0.103423 -0.076104 0.358623
v 0.090321 -0.115411 0.358078
v 0.090321 -0.102309 0.358623
v 0.077218 -0.115411 0.358078
v 0.077218 -0.102309 0.358623
v 0.090321 -0.089206 0.358623
v 0.090321 -0.076104 0.358623
v 0.077218 -0.089206 0.358623
v 0.077218 -0.076104 0.358623
v 0.116525 -0.063002 0.358623
v 0.116525 -0.049899 0.358623
v 0.103423 -0.063002 0.358623
v 0.103423 -0.049899 0.358623
v 0.116525 -0.036797 0.358623
v 0.116525 -0.023695 0.358623
v 0.103423 -0.036797 0.358623
v 0.103423 -0.023695 0.358623
v 0.090321 -0.063002 0.358623
v 0.090321 -0.049899 0.358623
v 0.077218 -0.063002 0.358623
v 0.077218 -0.049899 0.358345
v 0.090321 -0.036797 0.358623
v 0.090321 -0.023695 0.358623
v 0.077218 -0.036797 0.358316
v 0.077218 -0.023695 0.358594
v 0.064116 -0.115411 0.358078
v 0.064116 -0.102309 0.358623
v 0.051013 -0.115411 0.358078
v 0.051013 -0.102309 0.358623
v 0.064116 -0.089206 0.358623
v 0.064116 -0.076104 0.358623
v 0.051013 -0.089206 0.358623
v 0.051013 -0.076104 0.358623
v 0.037911 -0.115411 0.358078
v 0.037911 -0.102309 0.358623
v 0.024809 -0.115411 0.358078
v 0.024809 -0.102309 0.358623
v 0.037911 -0.089206 0.358623
v 0.037911 -0.076104 0.358623
v 0.024809 -0.089206 0.358623
v 0.024809 -0.076104 0.358623
v 0.064116 -0.063002 0.358623
v 0.064116 -0.049899 0.357813
v 0.051013 -0.063002 0.358623
v 0.051013 -0.049899 0.357559
v 0.064116 -0.036797 0.356938
v 0.064116 -0.023695 0.357365
v 0.050431 -0.035958 0.352947
v 0.045675 -0.031031 0.347081
v 0.050431 -0.023244 0.351866
v 0.045675 -0.027310 0.347081
v 0.037911 -0.063002 0.358623
v 0.037911 -0.049899 0.357559
v 0.024809 -0.063002 0.358623
v 0.024809 -0.049899 0.357559
v 0.037911 -0.037975 0.352375
v 0.037911 -0.031423 0.346493
v 0.043871 -0.018576 0.349000
v 0.038428 -0.023809 0.342713
v 0.024809 -0.037975 0.352375
v 0.024809 -0.031423 0.346493
v 0.024809 -0.028442 0.339942
v 0.033534 -0.021646 0.328602
v 0.033269 -0.021401 0.315500
v 0.024809 -0.026148 0.328602
v 0.024809 -0.025659 0.315500
v -0.137760 -0.268763 0.338196
v -0.137965 -0.255206 0.349247
v -0.135728 -0.259559 0.342220
v -0.136886 -0.270692 0.328602
v -0.136618 -0.271285 0.315500
v -0.131836 -0.259537 0.328602
v -0.131299 -0.259537 0.315500
v -0.125070 -0.241646 0.337633
v -0.125276 -0.228090 0.348995
v -0.123369 -0.232807 0.341882
v -0.135980 -0.246435 0.350645
v -0.129424 -0.246182 0.341882
v -0.131940 -0.232807 0.351776
v -0.127253 -0.236824 0.346368
v -0.124403 -0.243119 0.328602
v -0.124135 -0.243711 0.315500
v -0.119972 -0.233332 0.328602
v -0.119436 -0.233332 0.315500
v -0.127369 -0.249670 0.328602
v -0.127101 -0.250263 0.315500
v -0.150655 -0.279648 0.348940
v -0.148309 -0.281368 0.341705
v -0.158624 -0.279877 0.349283
v -0.158624 -0.283545 0.341705
v -0.146403 -0.283103 0.328602
v -0.146135 -0.283347 0.315500
v -0.158624 -0.287016 0.328602
v -0.158624 -0.287504 0.315500
v -0.171726 -0.279877 0.349283
v -0.171726 -0.283545 0.341705
v -0.184829 -0.279877 0.349283
v -0.184829 -0.283545 0.341705
v -0.171726 -0.287016 0.328602
v -0.171726 -0.287504 0.315500
v -0.184829 -0.287016 0.328602
v -0.184829 -0.287504 0.315500
v -0.148463 -0.272639 0.350604
v -0.141783 -0.272934 0.342220
v -0.144795 -0.259559 0.352122
v -0.139943 -0.263941 0.346931
v -0.158624 -0.272639 0.353362
v -0.158624 -0.259537 0.357182
v -0.139852 -0.277243 0.328602
v -0.139584 -0.277836 0.315500
v -0.145522 -0.246435 0.355424
v -0.145522 -0.233332 0.357217
v -0.158624 -0.246435 0.358219
v -0.158624 -0.233332 0.358556
v -0.171726 -0.272639 0.353773
v -0.171726 -0.259537 0.357930
v -0.184829 -0.272639 0.353773
v -0.184829 -0.259537 0.357930
v -0.171726 -0.246435 0.358623
v -0.171726 -0.233332 0.358623
v -0.184829 -0.246435 0.358623
v -0.184829 -0.233332 0.358623
v 0.011706 -0.136498 0.349782
v 0.011706 -0.140913 0.341705
v 0.011706 -0.128514 0.354421
v -0.001396 -0.136498 0.349782
v -0.001396 -0.140913 0.341705
v -0.001396 -0.128514 0.354421
v 0.011706 -0.144384 0.328602
v 0.011706 -0.144872 0.315500
v -0.001396 -0.144384 0.328602
v -0.001396 -0.144872 0.315500
v -0.014498 -0.136498 0.349782
v -0.014498 -0.140913 0.341705
v -0.014498 -0.128514 0.354421
v -0.027601 -0.136498 0.349782
v -0.027601 -0.140913 0.341705
v -0.027601 -0.128514 0.354421
v -0.014498 -0.144384 0.328602
v -0.014498 -0.144872 0.315500
v -0.027601 -0.144384 0.328602
v -0.027601 -0.144872 0.315500
v -0.040703 -0.136498 0.349782
v -0.040703 -0.140913 0.341705
v -0.040703 -0.128514 0.354421
v -0.053805 -0.136498 0.349782
v -0.053805 -0.140913 0.341705
v -0.053805 -0.128514 0.354421
v -0.040703 -0.144384 0.328602
v -0.040703 -0.144872 0.315500
v -0.053805 -0.144384 0.328602
v -0.053805 -0.144872 0.315500
v -0.085025 -0.151560 0.338640
v -0.083989 -0.153849 0.328602
v -0.083721 -0.154441 0.315500
v -0.066908 -0.136498 0.349782
v -0.066908 -0.140913 0.341705
v -0.066908 -0.128514 0.354421
v -0.080010 -0.137986 0.349911
v -0.080399 -0.144409 0.342487
v -0.080010 -0.128514 0.354550
v -0.066908 -0.144384 0.328602
v -0.066908 -0.144872 0.315500
v -0.077438 -0.146275 0.328602
v -0.077170 -0.146520 0.315500
v 0.011706 -0.115411 0.358078
v 0.011706 -0.102309 0.358623
v -0.001396 -0.115411 0.358078
v -0.001396 -0.102309 0.358623
v 0.011706 -0.089206 0.358623
v 0.011706 -0.076104 0.358623
v -0.001396 -0.089206 0.358623
v -0.001396 -0.076104 0.358623
v -0.014498 -0.115411 0.358079
v -0.014498 -0.102309 0.358623
v -0.027601 -0.115411 0.358079
v -0.027601 -0.102309 0.358623
v -0.014498 -0.089206 0.358623
v -0.014498 -0.076104 0.358623
v -0.027601 -0.089206 0.358623
v -0.027601 -0.076104 0.358623
v 0.011706 -0.063002 0.358623
v 0.011706 -0.049899 0.357559
v -0.001396 -0.063002 0.358623
v -0.001396 -0.049899 0.357559
v 0.011706 -0.037975 0.352375
v 0.011706 -0.031423 0.346493
v 0.011706 -0.028442 0.339942
v -0.001396 -0.037975 0.352375
v -0.001396 -0.031423 0.346493
v -0.001396 -0.028442 0.339942
v 0.011706 -0.026148 0.328602
v 0.011706 -0.025659 0.315500
v -0.001396 -0.026148 0.328602
v -0.001396 -0.025659 0.315500
v -0.014498 -0.063002 0.358623
v -0.014498 -0.049899 0.357559
v -0.027601 -0.063002 0.358623
v -0.027601 -0.049899 0.357559
v -0.014498 -0.037975 0.352375
v -0.014498 -0.031423 0.346493
v -0.014498 -0.028442 0.339942
v -0.027601 -0.037975 0.352375
v -0.027601 -0.031423 0.347003
v -0.032569 -0.020698 0.349601
v -0.027114 -0.024870 0.343053
v -0.014498 -0.026148 0.328602
v -0.014498 -0.025659 0.315500
v -0.021695 -0.021646 0.328602
v -0.021428 -0.021401 0.315500
v -0.040703 -0.115411 0.358079
v -0.040703 -0.102309 0.358623
v -0.053805 -0.115411 0.358079
v -0.053805 -0.102309 0.358623
v -0.040703 -0.089206 0.358623
v -0.040703 -0.076104 0.358623
v -0.053805 -0.089206 0.358623
v -0.053805 -0.076104 0.358623
v -0.066908 -0.115411 0.358079
v -0.066908 -0.102309 0.358623
v -0.080010 -0.115411 0.358079
v -0.080010 -0.102309 0.358623
v -0.066908 -0.089206 0.358623
v -0.066908 -0.076104 0.358623
v -0.080010 -0.089206 0.358623
v -0.080010 -0.076104 0.358623
v -0.040703 -0.063002 0.358623
v -0.040703 -0.049899 0.357559
v -0.053805 -0.063002 0.358623
v -0.053805 -0.049899 0.357900
v -0.039610 -0.035958 0.353208
v -0.034514 -0.031031 0.347761
v -0.039610 -0.024517 0.352588
v -0.034514 -0.029433 0.347761
v -0.053805 -0.036797 0.357379
v -0.053805 -0.023695 0.357847
v -0.066908 -0.063002 0.358623
v -0.066908 -0.049899 0.358433
v -0.080010 -0.063002 0.358623
v -0.080010 -0.049899 0.358623
v -0.066908 -0.036797 0.358433
v -0.066908 -0.023695 0.358623
v -0.080010 -0.036797 0.358623
v -0.080010 -0.023695 0.358623
v -0.112381 -0.214529 0.336917
v -0.112586 -0.200973 0.348501
v -0.111010 -0.206055 0.341452
v -0.111920 -0.215546 0.328602
v -0.111652 -0.216138 0.315500
v -0.108109 -0.207128 0.328602
v -0.107573 -0.207128 0.315500
v -0.097714 -0.178677 0.339203
v -0.111013 -0.194025 0.349708
v -0.105987 -0.194025 0.341705
v -0.108048 -0.180923 0.351611
v -0.101147 -0.182196 0.342824
v -0.099334 -0.188201 0.326290
v -0.099169 -0.188565 0.315500
v -0.096913 -0.182196 0.329836
v -0.095710 -0.180923 0.315500
v -0.101872 -0.193151 0.329836
v -0.102135 -0.195116 0.315500
v -0.099692 -0.187412 0.335025
v -0.123497 -0.220230 0.350268
v -0.117065 -0.219430 0.341452
v -0.119085 -0.206055 0.351283
v -0.114563 -0.209708 0.345651
v -0.132419 -0.220230 0.354935
v -0.132419 -0.207128 0.356916
v -0.114886 -0.222097 0.328602
v -0.114618 -0.222689 0.315500
v -0.119317 -0.194025 0.354263
v -0.119317 -0.180923 0.356615
v -0.132419 -0.194025 0.357995
v -0.132419 -0.180923 0.358444
v -0.097919 -0.165122 0.349696
v -0.095092 -0.168822 0.342824
v -0.095564 -0.154718 0.351319
v -0.088787 -0.155444 0.342487
v -0.105044 -0.168822 0.352674
v -0.099897 -0.173856 0.347938
v -0.106215 -0.154718 0.356267
v -0.090314 -0.167821 0.328602
v -0.089778 -0.167821 0.315500
v -0.086955 -0.160400 0.328602
v -0.086687 -0.160992 0.315500
v -0.092190 -0.142070 0.352395
v -0.087207 -0.146740 0.347375
v -0.093112 -0.128514 0.356336
v -0.106215 -0.141616 0.357722
v -0.106215 -0.128514 0.358308
v -0.119317 -0.167821 0.357883
v -0.119317 -0.154718 0.358387
v -0.132419 -0.167821 0.358623
v -0.132419 -0.154718 0.358623
v -0.119317 -0.141616 0.358623
v -0.119317 -0.128514 0.358623
v -0.132419 -0.141616 0.358623
v -0.132419 -0.128514 0.358623
v -0.145522 -0.220230 0.358107
v -0.145522 -0.207128 0.358500
v -0.158624 -0.220230 0.358623
v -0.158624 -0.207128 0.358623
v -0.145522 -0.194025 0.358623
v -0.145522 -0.180923 0.358623
v -0.158624 -0.194025 0.358623
v -0.158624 -0.180923 0.358623
v -0.171726 -0.220230 0.358623
v -0.171726 -0.207128 0.358623
v -0.184829 -0.220230 0.358623
v -0.184829 -0.207128 0.358623
v -0.171726 -0.194025 0.358623
v -0.171726 -0.180923 0.358623
v -0.184829 -0.194025 0.358623
v -0.184829 -0.180923 0.358623
v -0.145522 -0.167821 0.358623
v -0.145522 -0.154718 0.358623
v -0.158624 -0.167821 0.358623
v -0.158624 -0.154718 0.358623
v -0.145522 -0.141616 0.358623
v -0.145522 -0.128514 0.358623
v -0.158624 -0.141616 0.358623
v -0.158624 -0.128514 0.358623
v -0.171726 -0.167821 0.358623
v -0.171726 -0.154718 0.358623
v -0.184829 -0.167821 0.358548
v -0.184829 -0.154718 0.358208
v -0.171726 -0.141616 0.358614
v -0.171726 -0.128514 0.358340
v -0.184829 -0.141616 0.357517
v -0.184829 -0.128514 0.355937
v -0.093112 -0.115411 0.358328
v -0.093112 -0.102309 0.358623
v -0.106215 -0.115411 0.358600
v -0.106215 -0.102309 0.358623
v -0.093112 -0.089206 0.358623
v -0.093112 -0.076104 0.358623
v -0.106215 -0.089206 0.358623
v -0.106215 -0.076104 0.358623
v -0.119317 -0.115411 0.358623
v -0.119317 -0.102309 0.358623
v -0.132419 -0.115411 0.358623
v -0.132419 -0.102309 0.358623
v -0.119317 -0.089206 0.358623
v -0.119317 -0.076104 0.358623
v -0.132419 -0.089206 0.358623
v -0.132419 -0.076104 0.358623
v -0.093112 -0.063002 0.358623
v -0.093112 -0.049899 0.358623
v -0.106215 -0.063002 0.358623
v -0.106215 -0.049899 0.358623
v -0.093112 -0.036797 0.358623
v -0.093112 -0.023695 0.358623
v -0.106215 -0.036797 0.358623
v -0.106215 -0.023695 0.358623
v -0.119317 -0.063002 0.358623
v -0.119317 -0.049899 0.358623
v -0.132419 -0.063002 0.358623
v -0.132419 -0.049899 0.358547
v -0.119317 -0.036797 0.358623
v -0.119317 -0.023695 0.358613
v -0.132419 -0.036797 0.358206
v -0.132419 -0.023695 0.357512
v -0.145522 -0.115411 0.358623
v -0.145522 -0.102309 0.358623
v -0.158624 -0.115411 0.358623
v -0.158624 -0.102309 0.358415
v -0.145522 -0.089206 0.358623
v -0.145522 -0.076104 0.358481
v -0.158624 -0.089206 0.357942
v -0.158624 -0.076104 0.356805
v -0.171726 -0.115411 0.357810
v -0.171726 -0.102309 0.356452
v -0.185841 -0.114771 0.352509
v -0.190883 -0.109977 0.347576
v -0.182627 -0.102309 0.351476
v -0.189461 -0.101354 0.342607
v -0.191117 -0.096350 0.333946
v -0.173029 -0.087914 0.352792
v -0.178264 -0.082684 0.348238
v -0.170251 -0.076104 0.351764
v -0.176802 -0.076104 0.345726
v -0.180206 -0.091419 0.349813
v -0.183195 -0.087914 0.343004
v -0.180065 -0.076104 0.339175
v -0.188790 -0.090390 0.329188
v -0.188608 -0.088890 0.315500
v -0.182387 -0.076104 0.328602
v -0.182923 -0.076104 0.315500
v -0.145522 -0.063002 0.358074
v -0.145522 -0.049899 0.357159
v -0.158624 -0.063002 0.354763
v -0.159052 -0.050574 0.351679
v -0.163704 -0.046657 0.346244
v -0.145522 -0.036797 0.355355
v -0.146240 -0.023717 0.352099
v -0.151086 -0.019364 0.346905
v -0.154961 -0.036797 0.350588
v -0.161503 -0.037157 0.341808
v -0.153028 -0.028098 0.349218
v -0.155237 -0.023717 0.342205
v -0.163587 -0.033818 0.328602
v -0.163855 -0.033216 0.315500
v -0.159086 -0.023695 0.328602
v -0.159621 -0.023695 0.315500
v -0.167338 -0.063002 0.350128
v -0.173734 -0.064014 0.341002
v -0.165646 -0.055392 0.348900
v -0.167468 -0.050574 0.341808
v -0.178498 -0.069057 0.336166
v -0.175963 -0.061655 0.328602
v -0.176231 -0.061053 0.315500
v -0.170737 -0.049899 0.328602
v -0.171272 -0.049899 0.315500
v -0.178876 -0.068206 0.328602
v -0.179144 -0.067604 0.315500
v -0.165879 -0.041764 0.337509
v -0.166499 -0.040369 0.328602
v -0.166767 -0.039767 0.315500
v 0.275674 -0.284733 0.302398
v 0.275496 -0.284407 0.289295
v 0.260651 -0.287504 0.302398
v 0.260651 -0.287015 0.289295
v 0.273025 -0.282399 0.277503
v 0.268789 -0.279647 0.268958
v 0.260651 -0.283544 0.276193
v 0.260651 -0.279876 0.268616
v 0.247549 -0.287504 0.302398
v 0.247549 -0.287015 0.289295
v 0.234446 -0.287504 0.302398
v 0.234446 -0.287015 0.289295
v 0.247549 -0.283544 0.276193
v 0.247549 -0.279876 0.268617
v 0.234446 -0.283544 0.276193
v 0.234446 -0.279876 0.268617
v 0.276716 -0.272639 0.302398
v 0.276184 -0.272639 0.289295
v 0.271120 -0.259537 0.302398
v 0.270588 -0.259537 0.289295
v 0.271535 -0.271720 0.275112
v 0.268789 -0.275474 0.268958
v 0.268629 -0.259537 0.279691
v 0.266924 -0.266739 0.270025
v 0.261794 -0.271720 0.267153
v 0.265386 -0.259537 0.273140
v 0.258835 -0.259537 0.266248
v 0.267762 -0.251675 0.302398
v 0.267496 -0.252298 0.289295
v 0.264964 -0.245124 0.302398
v 0.264698 -0.245747 0.289295
v 0.259928 -0.233332 0.302398
v 0.259396 -0.233332 0.289295
v 0.267221 -0.252942 0.282658
v 0.262403 -0.247719 0.277452
v 0.256037 -0.246435 0.267963
v 0.256221 -0.234139 0.276127
v 0.254458 -0.239044 0.269148
v 0.247549 -0.272639 0.264287
v 0.247549 -0.259537 0.261575
v 0.234446 -0.272639 0.264128
v 0.234446 -0.259537 0.260133
v 0.247549 -0.246435 0.263361
v 0.252593 -0.230309 0.271716
v 0.247955 -0.234139 0.266326
v 0.234446 -0.246435 0.259858
v 0.234446 -0.233332 0.260760
v 0.255615 -0.223234 0.302398
v 0.255349 -0.223857 0.289295
v 0.254755 -0.225247 0.280451
v 0.252817 -0.216683 0.302398
v 0.252551 -0.217306 0.289295
v 0.248735 -0.207128 0.302398
v 0.248203 -0.207128 0.289295
v 0.250446 -0.220620 0.276127
v 0.243889 -0.220230 0.267298
v 0.244264 -0.207040 0.275602
v 0.241993 -0.211349 0.268652
v 0.234446 -0.220230 0.262521
v 0.240127 -0.202614 0.270840
v 0.235234 -0.207040 0.265724
v 0.243467 -0.194794 0.302398
v 0.243201 -0.195417 0.289295
v 0.240669 -0.188242 0.302398
v 0.240403 -0.188865 0.289295
v 0.237543 -0.180923 0.302398
v 0.237011 -0.180923 0.289295
v 0.242289 -0.197552 0.279575
v 0.238490 -0.193520 0.275602
v 0.231742 -0.194025 0.266711
v 0.232308 -0.179941 0.275076
v 0.229527 -0.183653 0.268261
v 0.231947 -0.167821 0.302398
v 0.231415 -0.167821 0.289295
v 0.228522 -0.159802 0.302398
v 0.228256 -0.160425 0.289295
v 0.229389 -0.167821 0.279490
v 0.227958 -0.161121 0.282452
v 0.221344 -0.287504 0.302398
v 0.221344 -0.287015 0.289295
v 0.208242 -0.287504 0.302398
v 0.208242 -0.287015 0.289295
v 0.221344 -0.283544 0.276193
v 0.221344 -0.279876 0.268617
v 0.208242 -0.283544 0.276193
v 0.208242 -0.279876 0.268617
v 0.195139 -0.287504 0.302398
v 0.195139 -0.287015 0.289295
v 0.182037 -0.287504 0.302398
v 0.182037 -0.287015 0.289295
v 0.195139 -0.283544 0.276193
v 0.195139 -0.279876 0.268617
v 0.182037 -0.283544 0.276193
v 0.182037 -0.279876 0.268617
v 0.221344 -0.272639 0.264128
v 0.221344 -0.259537 0.259971
v 0.208242 -0.272639 0.264128
v 0.208242 -0.259537 0.259971
v 0.221344 -0.246435 0.259278
v 0.221344 -0.233332 0.259352
v 0.208242 -0.246435 0.259278
v 0.208242 -0.233332 0.259278
v 0.195139 -0.272639 0.264128
v 0.195139 -0.259537 0.259971
v 0.182037 -0.272639 0.264128
v 0.182037 -0.259537 0.259971
v 0.195139 -0.246435 0.259278
v 0.195139 -0.233332 0.259278
v 0.182037 -0.246435 0.259278
v 0.182037 -0.233332 0.259278
v 0.168935 -0.287504 0.302398
v 0.168935 -0.287015 0.289295
v 0.155832 -0.286211 0.302398
v 0.155832 -0.285345 0.289295
v 0.168935 -0.283544 0.276193
v 0.168935 -0.279876 0.268617
v 0.155543 -0.281580 0.276287
v 0.159717 -0.279647 0.268958
v 0.148056 -0.282054 0.302398
v 0.148322 -0.281432 0.289295
v 0.148819 -0.280270 0.280717
v 0.168935 -0.272639 0.264226
v 0.168935 -0.259537 0.260257
v 0.150982 -0.275215 0.271982
v 0.155543 -0.271564 0.267376
v 0.155832 -0.259537 0.263697
v 0.168935 -0.246435 0.259466
v 0.168935 -0.233332 0.259278
v 0.155832 -0.246435 0.261366
v 0.155832 -0.233332 0.260083
v 0.144028 -0.272639 0.302398
v 0.144560 -0.272639 0.289295
v 0.138702 -0.260191 0.302398
v 0.138511 -0.258489 0.288451
v 0.135899 -0.253640 0.302398
v 0.135992 -0.253422 0.292255
v 0.147505 -0.271564 0.276287
v 0.149113 -0.266480 0.269411
v 0.142730 -0.259537 0.276193
v 0.147628 -0.259537 0.268247
v 0.136347 -0.252593 0.283520
v 0.132816 -0.246435 0.302398
v 0.133813 -0.247509 0.288451
v 0.127210 -0.233332 0.302398
v 0.127742 -0.233332 0.289295
v 0.137956 -0.247509 0.275264
v 0.144825 -0.246435 0.266360
v 0.136641 -0.238803 0.270278
v 0.141697 -0.233994 0.265395
v 0.134478 -0.243858 0.279013
v 0.132173 -0.233994 0.275264
v 0.134772 -0.230068 0.268400
v 0.221344 -0.220230 0.259683
v 0.221344 -0.207128 0.260304
v 0.208242 -0.220230 0.259278
v 0.208242 -0.207128 0.259278
v 0.221344 -0.194025 0.261772
v 0.227662 -0.174918 0.269963
v 0.222514 -0.179941 0.265262
v 0.208242 -0.194025 0.259521
v 0.208242 -0.180923 0.260020
v 0.195139 -0.220230 0.259278
v 0.195139 -0.207128 0.259278
v 0.182037 -0.220230 0.259278
v 0.182037 -0.207128 0.259278
v 0.195139 -0.194025 0.259278
v 0.195139 -0.180923 0.259278
v 0.182037 -0.194025 0.259278
v 0.182037 -0.180923 0.259278
v 0.225724 -0.153251 0.302398
v 0.225458 -0.153873 0.289295
v 0.226146 -0.167821 0.272939
v 0.219595 -0.167821 0.266221
v 0.223176 -0.155940 0.277328
v 0.216797 -0.154718 0.267896
v 0.208242 -0.167821 0.261195
v 0.208242 -0.154718 0.263282
v 0.220754 -0.141616 0.302398
v 0.220223 -0.141616 0.289295
v 0.216375 -0.131361 0.302398
v 0.216109 -0.131984 0.289295
v 0.213577 -0.124810 0.302398
v 0.213311 -0.125433 0.289295
v 0.216994 -0.142360 0.276091
v 0.215196 -0.147223 0.269087
v 0.215493 -0.133426 0.280390
v 0.213331 -0.138488 0.271655
v 0.208674 -0.142360 0.266268
v 0.211219 -0.128841 0.276091
v 0.204649 -0.128514 0.267256
v 0.195139 -0.167821 0.259434
v 0.195139 -0.154718 0.259846
v 0.182037 -0.167821 0.259278
v 0.182037 -0.154718 0.259278
v 0.195139 -0.141616 0.260727
v 0.195139 -0.128514 0.262468
v 0.182037 -0.141616 0.259346
v 0.182037 -0.128514 0.259671
v 0.168935 -0.220230 0.259278
v 0.168935 -0.207128 0.259278
v 0.155832 -0.220230 0.259570
v 0.155832 -0.207128 0.259296
v 0.168935 -0.194025 0.259278
v 0.168935 -0.180923 0.259278
v 0.155832 -0.194025 0.259278
v 0.155832 -0.180923 0.259278
v 0.123742 -0.225226 0.302398
v 0.124008 -0.224605 0.289295
v 0.142730 -0.220230 0.262028
v 0.142730 -0.207128 0.260455
v 0.125987 -0.220421 0.275785
v 0.132668 -0.220230 0.266918
v 0.124169 -0.211126 0.271145
v 0.128973 -0.206906 0.265911
v 0.142730 -0.194025 0.259743
v 0.142730 -0.180923 0.259382
v 0.129628 -0.194025 0.262782
v 0.129628 -0.180923 0.260919
v 0.168935 -0.167821 0.259278
v 0.168935 -0.154718 0.259278
v 0.155832 -0.167821 0.259278
v 0.155832 -0.154718 0.259278
v 0.168935 -0.141616 0.259278
v 0.168935 -0.128514 0.259278
v 0.155832 -0.141616 0.259278
v 0.155832 -0.128514 0.259278
v 0.142730 -0.167821 0.259278
v 0.142730 -0.154718 0.259278
v 0.129628 -0.167821 0.259916
v 0.129628 -0.154718 0.259469
v 0.142730 -0.141616 0.259278
v 0.142730 -0.128514 0.259278
v 0.129628 -0.141616 0.259278
v 0.129628 -0.128514 0.259278
v 0.209562 -0.115411 0.302398
v 0.209030 -0.115411 0.289295
v 0.204227 -0.102920 0.302398
v 0.203961 -0.103543 0.289295
v 0.205037 -0.115261 0.275565
v 0.202730 -0.119528 0.268624
v 0.203027 -0.105731 0.279513
v 0.201429 -0.096369 0.302398
v 0.201163 -0.096992 0.289295
v 0.200865 -0.110793 0.270778
v 0.195954 -0.115261 0.265686
v 0.199263 -0.101741 0.275565
v 0.192502 -0.102309 0.266670
v 0.182037 -0.115411 0.260278
v 0.182037 -0.102309 0.261725
v 0.198370 -0.089206 0.302398
v 0.197838 -0.089206 0.289295
v 0.192774 -0.076104 0.302398
v 0.192242 -0.076104 0.289295
v 0.193081 -0.088161 0.275039
v 0.190265 -0.091832 0.268234
v 0.190149 -0.076104 0.279290
v 0.188399 -0.083097 0.269902
v 0.183234 -0.088161 0.265236
v 0.186906 -0.076104 0.272739
v 0.180355 -0.076104 0.266195
v 0.189282 -0.067929 0.302398
v 0.189016 -0.068551 0.289295
v 0.186484 -0.061378 0.302398
v 0.186218 -0.062000 0.289295
v 0.181581 -0.049899 0.302398
v 0.181049 -0.049899 0.289295
v 0.188696 -0.069301 0.282246
v 0.183949 -0.064161 0.277204
v 0.177556 -0.063002 0.267830
v 0.177767 -0.050581 0.276054
v 0.175934 -0.055402 0.269025
v 0.177134 -0.039488 0.302398
v 0.176868 -0.040111 0.289295
v 0.176230 -0.041605 0.280328
v 0.168935 -0.115411 0.259278
v 0.168935 -0.102309 0.259515
v 0.155832 -0.115411 0.259278
v 0.155832 -0.102309 0.259278
v 0.168935 -0.089206 0.260008
v 0.168935 -0.076104 0.261162
v 0.155832 -0.089206 0.259278
v 0.155832 -0.076104 0.259428
v 0.142730 -0.115411 0.259278
v 0.142730 -0.102309 0.259278
v 0.129628 -0.115411 0.259278
v 0.129628 -0.102309 0.259278
v 0.142730 -0.089206 0.259278
v 0.142730 -0.076104 0.259278
v 0.129628 -0.089206 0.259278
v 0.129628 -0.076104 0.259278
v 0.168935 -0.063002 0.263204
v 0.174068 -0.046667 0.271593
v 0.169394 -0.050581 0.266209
v 0.155832 -0.063002 0.259833
v 0.155832 -0.049899 0.260694
v 0.174336 -0.032937 0.302398
v 0.174070 -0.033560 0.289295
v 0.170389 -0.023695 0.302398
v 0.169857 -0.023695 0.289295
v 0.171993 -0.037062 0.276054
v 0.165409 -0.036797 0.267216
v 0.165811 -0.023482 0.275528
v 0.163468 -0.027707 0.268597
v 0.155832 -0.036797 0.262414
v 0.161602 -0.018972 0.270717
v 0.156674 -0.023482 0.265648
v 0.142730 -0.063002 0.259278
v 0.142730 -0.049899 0.259340
v 0.129628 -0.063002 0.259278
v 0.129628 -0.049899 0.259278
v 0.142730 -0.036797 0.259659
v 0.142730 -0.023695 0.260251
v 0.129628 -0.036797 0.259278
v 0.129628 -0.023695 0.259278
v 0.120939 -0.218675 0.302398
v 0.121205 -0.218053 0.289295
v 0.115998 -0.207128 0.302398
v 0.116530 -0.207128 0.289295
v 0.122006 -0.216181 0.279880
v 0.120205 -0.206906 0.275785
v 0.122300 -0.202391 0.268787
v 0.111584 -0.196813 0.302398
v 0.111850 -0.196191 0.289295
v 0.108781 -0.190262 0.302398
v 0.109047 -0.189640 0.289295
v 0.104786 -0.180923 0.302398
v 0.105318 -0.180923 0.289295
v 0.114019 -0.193333 0.276305
v 0.120510 -0.194025 0.267498
v 0.111697 -0.183448 0.272012
v 0.116249 -0.179817 0.266605
v 0.109534 -0.188503 0.280747
v 0.108237 -0.179817 0.276305
v 0.109828 -0.174713 0.269441
v 0.099427 -0.168399 0.302398
v 0.099243 -0.166742 0.288511
v 0.097061 -0.160826 0.283621
v 0.116525 -0.167821 0.263736
v 0.116525 -0.154718 0.261382
v 0.103488 -0.167821 0.276193
v 0.108353 -0.167821 0.268279
v 0.098688 -0.155762 0.275282
v 0.105550 -0.154718 0.266373
v 0.116525 -0.141616 0.260089
v 0.116525 -0.128514 0.259576
v 0.097356 -0.147036 0.270308
v 0.102403 -0.142247 0.265408
v 0.103423 -0.128514 0.261518
v 0.096624 -0.161848 0.302398
v 0.096707 -0.161655 0.292356
v 0.093573 -0.154718 0.302398
v 0.094545 -0.155762 0.288511
v 0.095193 -0.152091 0.279042
v 0.087270 -0.146520 0.302398
v 0.087536 -0.146275 0.289295
v 0.077218 -0.144872 0.302398
v 0.077218 -0.144383 0.289295
v 0.090623 -0.144586 0.275282
v 0.090321 -0.138208 0.267958
v 0.090321 -0.128514 0.263321
v 0.077218 -0.140912 0.276193
v 0.077218 -0.136497 0.268118
v 0.077218 -0.128514 0.263480
v 0.064116 -0.144872 0.302398
v 0.064116 -0.144383 0.289295
v 0.051013 -0.144872 0.302398
v 0.051013 -0.144383 0.289295
v 0.064116 -0.140912 0.276193
v 0.064116 -0.136497 0.268118
v 0.064116 -0.128514 0.263480
v 0.051013 -0.140912 0.276193
v 0.051013 -0.136497 0.268118
v 0.051013 -0.128514 0.263480
v 0.037911 -0.144872 0.302398
v 0.037911 -0.144383 0.289295
v 0.024809 -0.144872 0.302398
v 0.024809 -0.144383 0.289295
v 0.037911 -0.140912 0.276193
v 0.037911 -0.136497 0.268118
v 0.037911 -0.128514 0.263480
v 0.024809 -0.140912 0.276193
v 0.024809 -0.136497 0.268118
v 0.024809 -0.128514 0.263480
v 0.116525 -0.115411 0.259299
v 0.116525 -0.102309 0.259278
v 0.103423 -0.115411 0.259571
v 0.103423 -0.102309 0.259278
v 0.116525 -0.089206 0.259278
v 0.116525 -0.076104 0.259278
v 0.103423 -0.089206 0.259278
v 0.103423 -0.076104 0.259278
v 0.090321 -0.115411 0.259822
v 0.090321 -0.102309 0.259278
v 0.077218 -0.115411 0.259822
v 0.077218 -0.102309 0.259278
v 0.090321 -0.089206 0.259278
v 0.090321 -0.076104 0.259278
v 0.077218 -0.089206 0.259278
v 0.077218 -0.076104 0.259278
v 0.116525 -0.063002 0.259278
v 0.116525 -0.049899 0.259278
v 0.103423 -0.063002 0.259278
v 0.103423 -0.049899 0.259278
v 0.116525 -0.036797 0.259278
v 0.116525 -0.023695 0.259278
v 0.103423 -0.036797 0.259278
v 0.103423 -0.023695 0.259278
v 0.090321 -0.063002 0.259278
v 0.090321 -0.049899 0.259278
v 0.077218 -0.063002 0.259278
v 0.077218 -0.049899 0.259556
v 0.090321 -0.036797 0.259278
v 0.090321 -0.023695 0.259278
v 0.077218 -0.036797 0.259585
v 0.077218 -0.023695 0.259307
v 0.064116 -0.115411 0.259822
v 0.064116 -0.102309 0.259278
v 0.051013 -0.115411 0.259822
v 0.051013 -0.102309 0.259278
v 0.064116 -0.089206 0.259278
v 0.064116 -0.076104 0.259278
v 0.051013 -0.089206 0.259278
v 0.051013 -0.076104 0.259278
v 0.037911 -0.115411 0.259822
v 0.037911 -0.102309 0.259278
v 0.024809 -0.115411 0.259822
v 0.024809 -0.102309 0.259278
v 0.037911 -0.089206 0.259278
v 0.037911 -0.076104 0.259278
v 0.024809 -0.089206 0.259278
v 0.024809 -0.076104 0.259278
v 0.064116 -0.063002 0.259278
v 0.064116 -0.049899 0.260088
v 0.051013 -0.063002 0.259278
v 0.051013 -0.049899 0.260342
v 0.064116 -0.036797 0.260963
v 0.064116 -0.023695 0.260536
v 0.045675 -0.031032 0.270818
v 0.050431 -0.035958 0.264952
v 0.045675 -0.027308 0.270818
v 0.050431 -0.023242 0.266033
v 0.037911 -0.063002 0.259278
v 0.037911 -0.049899 0.260342
v 0.024809 -0.063002 0.259278
v 0.024809 -0.049899 0.260342
v 0.033269 -0.021401 0.302398
v 0.033534 -0.021646 0.289295
v 0.024809 -0.025659 0.302398
v 0.024809 -0.026148 0.289295
v 0.037911 -0.031424 0.271406
v 0.037911 -0.037976 0.265524
v 0.038429 -0.023808 0.275186
v 0.043872 -0.018574 0.268899
v 0.024809 -0.031424 0.271406
v 0.024809 -0.037976 0.265524
v 0.024809 -0.028442 0.277958
v -0.136618 -0.271285 0.302398
v -0.136886 -0.270692 0.289295
v -0.131299 -0.259537 0.302398
v -0.131836 -0.259537 0.289295
v -0.137760 -0.268762 0.279703
v -0.135729 -0.259558 0.275679
v -0.137966 -0.255204 0.268652
v -0.124135 -0.243711 0.302398
v -0.124404 -0.243118 0.289295
v -0.119436 -0.233332 0.302398
v -0.119973 -0.233332 0.289295
v -0.127101 -0.250263 0.302398
v -0.127369 -0.249670 0.289295
v -0.125071 -0.241645 0.280266
v -0.123370 -0.232806 0.276016
v -0.125276 -0.228088 0.268904
v -0.129425 -0.246181 0.276016
v -0.135981 -0.246435 0.267255
v -0.127254 -0.236823 0.271531
v -0.131940 -0.232806 0.266124
v -0.146135 -0.283347 0.302398
v -0.146403 -0.283103 0.289295
v -0.158624 -0.287504 0.302398
v -0.158624 -0.287015 0.289295
v -0.148309 -0.281367 0.276193
v -0.150655 -0.279647 0.268958
v -0.158624 -0.283544 0.276193
v -0.158624 -0.279876 0.268617
v -0.171726 -0.287504 0.302398
v -0.171726 -0.287015 0.289295
v -0.184829 -0.287504 0.302398
v -0.184829 -0.287015 0.289295
v -0.171726 -0.283544 0.276193
v -0.171726 -0.279876 0.268617
v -0.184829 -0.283544 0.276193
v -0.184829 -0.279876 0.268617
v -0.139584 -0.277836 0.302398
v -0.139852 -0.277243 0.289295
v -0.141784 -0.272933 0.275679
v -0.148464 -0.272639 0.267296
v -0.139943 -0.263939 0.270968
v -0.144795 -0.259558 0.265778
v -0.158624 -0.272639 0.264539
v -0.158624 -0.259537 0.260719
v -0.145522 -0.246435 0.262476
v -0.145522 -0.233332 0.260684
v -0.158624 -0.246435 0.259682
v -0.158624 -0.233332 0.259345
v -0.171726 -0.272639 0.264128
v -0.171726 -0.259537 0.259972
v -0.184829 -0.272639 0.264128
v -0.184829 -0.259537 0.259972
v -0.171726 -0.246435 0.259278
v -0.171726 -0.233332 0.259278
v -0.184829 -0.246435 0.259278
v -0.184829 -0.233332 0.259278
v 0.011706 -0.144872 0.302398
v 0.011706 -0.144383 0.289295
v -0.001396 -0.144872 0.302398
v -0.001396 -0.144383 0.289295
v 0.011706 -0.140912 0.276193
v 0.011706 -0.136497 0.268118
v 0.011706 -0.128514 0.263480
v -0.001396 -0.140912 0.276193
v -0.001396 -0.136497 0.268118
v -0.001396 -0.128514 0.263480
v -0.014498 -0.144872 0.302398
v -0.014498 -0.144383 0.289295
v -0.027601 -0.144872 0.302398
v -0.027601 -0.144383 0.289295
v -0.014498 -0.140912 0.276193
v -0.014498 -0.136497 0.268118
v -0.014498 -0.128514 0.263480
v -0.027601 -0.140912 0.276193
v -0.027601 -0.136497 0.268118
v -0.027601 -0.128514 0.263480
v -0.040703 -0.144872 0.302398
v -0.040703 -0.144383 0.289295
v -0.053805 -0.144872 0.302398
v -0.053805 -0.144383 0.289295
v -0.040703 -0.140912 0.276193
v -0.040703 -0.136497 0.268118
v -0.040703 -0.128514 0.263480
v -0.053805 -0.140912 0.276193
v -0.053805 -0.136497 0.268118
v -0.053805 -0.128514 0.263480
v -0.083721 -0.154441 0.302398
v -0.083989 -0.153848 0.289295
v -0.085025 -0.151559 0.279259
v -0.066908 -0.144872 0.302398
v -0.066908 -0.144383 0.289295
v -0.077170 -0.146520 0.302398
v -0.077438 -0.146275 0.289295
v -0.066908 -0.140912 0.276193
v -0.066908 -0.136497 0.268118
v -0.066908 -0.128514 0.263480
v -0.080399 -0.144407 0.275412
v -0.080010 -0.137985 0.267989
v -0.080010 -0.128514 0.263351
v 0.011706 -0.115411 0.259822
v 0.011706 -0.102309 0.259278
v -0.001396 -0.115411 0.259822
v -0.001396 -0.102309 0.259278
v 0.011706 -0.089206 0.259278
v 0.011706 -0.076104 0.259278
v -0.001396 -0.089206 0.259278
v -0.001396 -0.076104 0.259278
v -0.014498 -0.115411 0.259822
v -0.014498 -0.102309 0.259278
v -0.027601 -0.115411 0.259822
v -0.027601 -0.102309 0.259278
v -0.014498 -0.089206 0.259278
v -0.014498 -0.076104 0.259278
v -0.027601 -0.089206 0.259278
v -0.027601 -0.076104 0.259278
v 0.011706 -0.063002 0.259278
v 0.011706 -0.049899 0.260342
v -0.001396 -0.063002 0.259278
v -0.001396 -0.049899 0.260342
v 0.011706 -0.025659 0.302398
v 0.011706 -0.026148 0.289295
v -0.001396 -0.025659 0.302398
v -0.001396 -0.026148 0.289295
v 0.011706 -0.031424 0.271406
v 0.011706 -0.037976 0.265524
v 0.011706 -0.028442 0.277958
v -0.001396 -0.031424 0.271406
v -0.001396 -0.037976 0.265524
v -0.001396 -0.028442 0.277958
v -0.014498 -0.063002 0.259278
v -0.014498 -0.049899 0.260342
v -0.027601 -0.063002 0.259278
v -0.027601 -0.049899 0.260342
v -0.014498 -0.025659 0.302398
v -0.014498 -0.026148 0.289295
v -0.021428 -0.021401 0.302398
v -0.021695 -0.021646 0.289295
v -0.014498 -0.031424 0.271406
v -0.014498 -0.037976 0.265524
v -0.014498 -0.028442 0.277958
v -0.027601 -0.031424 0.270896
v -0.027601 -0.037976 0.265524
v -0.027114 -0.024869 0.274846
v -0.032570 -0.020696 0.268298
v -0.040703 -0.115411 0.259822
v -0.040703 -0.102309 0.259278
v -0.053805 -0.115411 0.259822
v -0.053805 -0.102309 0.259278
v -0.040703 -0.089206 0.259278
v -0.040703 -0.076104 0.259278
v -0.053805 -0.089206 0.259278
v -0.053805 -0.076104 0.259278
v -0.066908 -0.115411 0.259822
v -0.066908 -0.102309 0.259278
v -0.080010 -0.115411 0.259822
v -0.080010 -0.102309 0.259278
v -0.066908 -0.089206 0.259278
v -0.066908 -0.076104 0.259278
v -0.080010 -0.089206 0.259278
v -0.080010 -0.076104 0.259278
v -0.040703 -0.063002 0.259278
v -0.040703 -0.049899 0.260342
v -0.053805 -0.063002 0.259278
v -0.053805 -0.049899 0.260001
v -0.034515 -0.031032 0.270138
v -0.039610 -0.035958 0.264692
v -0.034515 -0.029431 0.270138
v -0.039610 -0.024516 0.265311
v -0.053805 -0.036797 0.260521
v -0.053805 -0.023695 0.260054
v -0.066908 -0.063002 0.259278
v -0.066908 -0.049899 0.259468
v -0.080010 -0.063002 0.259278
v -0.080010 -0.049899 0.259278
v -0.066908 -0.036797 0.259468
v -0.066908 -0.023695 0.259278
v -0.080010 -0.036797 0.259278
v -0.080010 -0.023695 0.259278
v -0.111652 -0.216138 0.302398
v -0.111921 -0.215545 0.289295
v -0.107573 -0.207128 0.302398
v -0.108110 -0.207128 0.289295
v -0.112382 -0.214528 0.280983
v -0.111011 -0.206054 0.276446
v -0.112587 -0.200971 0.269398
v -0.099169 -0.188565 0.302398
v -0.099334 -0.188201 0.291610
v -0.095710 -0.180923 0.302398
v -0.096913 -0.182195 0.288064
v -0.102135 -0.195116 0.302398
v -0.101873 -0.193151 0.288064
v -0.099692 -0.187411 0.282875
v -0.097715 -0.178676 0.278696
v -0.105989 -0.194025 0.276193
v -0.111015 -0.194025 0.268191
v -0.101148 -0.182195 0.275074
v -0.108049 -0.180923 0.266288
v -0.114618 -0.222689 0.302398
v -0.114887 -0.222096 0.289295
v -0.117066 -0.219429 0.276446
v -0.123498 -0.220230 0.267632
v -0.114564 -0.209706 0.272248
v -0.119086 -0.206054 0.266617
v -0.132419 -0.220230 0.262966
v -0.132419 -0.207128 0.260985
v -0.119317 -0.194025 0.263638
v -0.119317 -0.180923 0.261285
v -0.132419 -0.194025 0.259906
v -0.132419 -0.180923 0.259457
v -0.089778 -0.167821 0.302398
v -0.090315 -0.167821 0.289295
v -0.086687 -0.160992 0.302398
v -0.086955 -0.160399 0.289295
v -0.095093 -0.168820 0.275074
v -0.097920 -0.165120 0.268203
v -0.088789 -0.155443 0.275412
v -0.095566 -0.154718 0.266581
v -0.099897 -0.173855 0.269961
v -0.105045 -0.168820 0.265225
v -0.106215 -0.154718 0.261634
v -0.087208 -0.146738 0.270524
v -0.092190 -0.142069 0.265504
v -0.093112 -0.128514 0.261565
v -0.106215 -0.141616 0.260179
v -0.106215 -0.128514 0.259593
v -0.119317 -0.167821 0.260019
v -0.119317 -0.154718 0.259514
v -0.132419 -0.167821 0.259278
v -0.132419 -0.154718 0.259278
v -0.119317 -0.141616 0.259278
v -0.119317 -0.128514 0.259278
v -0.132419 -0.141616 0.259278
v -0.132419 -0.128514 0.259278
v -0.145522 -0.220230 0.259794
v -0.145522 -0.207128 0.259401
v -0.158624 -0.220230 0.259278
v -0.158624 -0.207128 0.259278
v -0.145522 -0.194025 0.259278
v -0.145522 -0.180923 0.259278
v -0.158624 -0.194025 0.259278
v -0.158624 -0.180923 0.259278
v -0.171726 -0.220230 0.259278
v -0.171726 -0.207128 0.259278
v -0.184829 -0.220230 0.259278
v -0.184829 -0.207128 0.259278
v -0.171726 -0.194025 0.259278
v -0.171726 -0.180923 0.259278
v -0.184829 -0.194025 0.259278
v -0.184829 -0.180923 0.259278
v -0.145522 -0.167821 0.259278
v -0.145522 -0.154718 0.259278
v -0.158624 -0.167821 0.259278
v -0.158624 -0.154718 0.259278
v -0.145522 -0.141616 0.259278
v -0.145522 -0.128514 0.259278
v -0.158624 -0.141616 0.259278
v -0.158624 -0.128514 0.259278
v -0.171726 -0.167821 0.259278
v -0.171726 -0.154718 0.259278
v -0.184829 -0.167821 0.259353
v -0.184829 -0.154718 0.259693
v -0.171726 -0.141616 0.259287
v -0.171726 -0.128514 0.259561
v -0.184829 -0.141616 0.260384
v -0.184829 -0.128514 0.261964
v -0.093112 -0.115411 0.259573
v -0.093112 -0.102309 0.259278
v -0.106215 -0.115411 0.259301
v -0.106215 -0.102309 0.259278
v -0.093112 -0.089206 0.259278
v -0.093112 -0.076104 0.259278
v -0.106215 -0.089206 0.259278
v -0.106215 -0.076104 0.259278
v -0.119317 -0.115411 0.259278
v -0.119317 -0.102309 0.259278
v -0.132419 -0.115411 0.259278
v -0.132419 -0.102309 0.259278
v -0.119317 -0.089206 0.259278
v -0.119317 -0.076104 0.259278
v -0.132419 -0.089206 0.259278
v -0.132419 -0.076104 0.259278
v -0.093112 -0.063002 0.259278
v -0.093112 -0.049899 0.259278
v -0.106215 -0.063002 0.259278
v -0.106215 -0.049899 0.259278
v -0.093112 -0.036797 0.259278
v -0.093112 -0.023695 0.259278
v -0.106215 -0.036797 0.259278
v -0.106215 -0.023695 0.259278
v -0.119317 -0.063002 0.259278
v -0.119317 -0.049899 0.259278
v -0.132419 -0.063002 0.259278
v -0.132419 -0.049899 0.259354
v -0.119317 -0.036797 0.259278
v -0.119317 -0.023695 0.259288
v -0.132419 -0.036797 0.259695
v -0.132419 -0.023695 0.260389
v -0.145522 -0.115411 0.259278
v -0.145522 -0.102309 0.259278
v -0.158624 -0.115411 0.259278
v -0.158624 -0.102309 0.259486
v -0.145522 -0.089206 0.259278
v -0.145522 -0.076104 0.259420
v -0.158624 -0.089206 0.259959
v -0.158624 -0.076104 0.261096
v -0.191116 -0.096350 0.283953
v -0.171726 -0.115411 0.260091
v -0.171726 -0.102309 0.261449
v -0.190882 -0.109979 0.270323
v -0.185840 -0.114772 0.265391
v -0.189460 -0.101354 0.275291
v -0.182626 -0.102309 0.266424
v -0.188608 -0.088890 0.302398
v -0.188790 -0.090390 0.288710
v -0.182923 -0.076104 0.302398
v -0.182387 -0.076104 0.289295
v -0.178264 -0.082686 0.269661
v -0.173028 -0.087915 0.265108
v -0.176801 -0.076104 0.272173
v -0.170249 -0.076104 0.266136
v -0.183194 -0.087915 0.274894
v -0.180206 -0.091421 0.268087
v -0.180065 -0.076104 0.278724
v -0.145522 -0.063002 0.259827
v -0.145522 -0.049899 0.260742
v -0.158624 -0.063002 0.263138
v -0.163704 -0.046658 0.271655
v -0.159051 -0.050575 0.266221
v -0.163855 -0.033216 0.302398
v -0.163587 -0.033818 0.289295
v -0.159621 -0.023695 0.302398
v -0.159086 -0.023695 0.289295
v -0.145522 -0.036797 0.262547
v -0.151085 -0.019365 0.270993
v -0.146239 -0.023717 0.265801
v -0.161502 -0.037157 0.276091
v -0.154960 -0.036797 0.267312
v -0.155236 -0.023717 0.275694
v -0.153027 -0.028100 0.268681
v -0.176231 -0.061053 0.302398
v -0.175963 -0.061656 0.289295
v -0.171272 -0.049899 0.302398
v -0.170736 -0.049899 0.289295
v -0.179144 -0.067604 0.302398
v -0.178876 -0.068207 0.289295
v -0.173733 -0.064014 0.276896
v -0.167337 -0.063002 0.267771
v -0.167468 -0.050575 0.276091
v -0.165645 -0.055393 0.268999
v -0.178498 -0.069057 0.281732
v -0.166767 -0.039767 0.302398
v -0.166499 -0.040370 0.289295
v -0.165879 -0.041764 0.280390
v 0.163765 -0.013909 0.338447
v 0.153263 -0.010592 0.351270
v 0.160038 -0.009962 0.342370
v 0.151003 -0.000010 0.349693
v 0.153855 0.003619 0.342896
v 0.164721 -0.011670 0.328602
v 0.164987 -0.011047 0.315500
v 0.161923 -0.005119 0.328602
v 0.162189 -0.004496 0.315500
v 0.158665 0.002510 0.328602
v 0.159197 0.002510 0.315500
v 0.150909 0.015612 0.338810
v 0.149434 0.022521 0.335859
v 0.153069 0.015612 0.328602
v 0.153601 0.015612 0.315500
v 0.149776 0.023322 0.328602
v 0.150042 0.023944 0.315500
v 0.142730 -0.010592 0.356223
v 0.143954 0.003619 0.352690
v 0.149137 0.008725 0.348058
v 0.129628 -0.010592 0.358392
v 0.129628 0.002510 0.357905
v 0.141116 0.015612 0.351731
v 0.147667 0.015612 0.345361
v 0.138317 0.028715 0.350136
v 0.144724 0.027619 0.340818
v 0.129628 0.015612 0.356771
v 0.129628 0.028715 0.354776
v 0.146978 0.029873 0.328602
v 0.147244 0.030496 0.315500
v 0.136672 0.036420 0.348935
v 0.138541 0.041199 0.341881
v 0.136968 0.050216 0.337632
v 0.130114 0.041199 0.351748
v 0.134807 0.045155 0.346367
v 0.126170 0.054919 0.350725
v 0.132767 0.054718 0.341881
v 0.141876 0.041817 0.328602
v 0.142408 0.041817 0.315500
v 0.137628 0.051763 0.328602
v 0.137894 0.052385 0.315500
v 0.134830 0.058314 0.328602
v 0.135096 0.058936 0.315500
v 0.124206 0.064116 0.349329
v 0.126585 0.068299 0.342407
v 0.124502 0.077912 0.338508
v 0.130684 0.068022 0.328602
v 0.131216 0.068022 0.315500
v 0.125481 0.080203 0.328602
v 0.125747 0.080826 0.315500
v 0.116525 -0.010592 0.358623
v 0.116525 0.002510 0.358623
v 0.103423 -0.010592 0.358623
v 0.103423 0.002510 0.358623
v 0.116525 0.015612 0.358480
v 0.116525 0.028715 0.358080
v 0.103423 0.015612 0.358623
v 0.103423 0.028715 0.358623
v 0.090321 -0.010592 0.358623
v 0.090321 0.002510 0.358623
v 0.077218 -0.010592 0.358623
v 0.077218 0.002510 0.358623
v 0.090321 0.015612 0.358623
v 0.090321 0.028715 0.358623
v 0.077218 0.015612 0.358623
v 0.077218 0.028715 0.358623
v 0.116525 0.041817 0.357239
v 0.116525 0.054919 0.355540
v 0.103423 0.041817 0.358567
v 0.103423 0.054919 0.358255
v 0.117394 0.068299 0.352289
v 0.122341 0.072850 0.347243
v 0.114023 0.081124 0.351311
v 0.120811 0.081817 0.342407
v 0.103423 0.068022 0.357676
v 0.103423 0.081124 0.356270
v 0.122683 0.086755 0.328602
v 0.122949 0.087377 0.315500
v 0.090321 0.041817 0.358623
v 0.090321 0.054919 0.358623
v 0.077218 0.041817 0.358623
v 0.077218 0.054919 0.358623
v 0.090321 0.068022 0.358623
v 0.090321 0.081124 0.358398
v 0.077218 0.068022 0.358623
v 0.077218 0.081124 0.358623
v 0.064116 -0.010592 0.358106
v 0.064116 0.002510 0.358489
v 0.051013 -0.010592 0.354874
v 0.051013 0.002510 0.356803
v 0.064116 0.015612 0.358623
v 0.064116 0.028715 0.358623
v 0.051013 0.015612 0.357896
v 0.051013 0.028715 0.358384
v 0.042222 -0.010592 0.350207
v 0.035784 -0.009541 0.340891
v 0.039517 0.002510 0.351753
v 0.032966 0.002510 0.345426
v 0.031182 -0.004472 0.335981
v 0.029740 0.002510 0.338874
v 0.033534 -0.011880 0.328602
v 0.033269 -0.012520 0.315500
v 0.030828 -0.005328 0.328602
v 0.030564 -0.005969 0.315500
v 0.027591 0.002510 0.328602
v 0.027063 0.002510 0.315500
v 0.036702 0.014547 0.352654
v 0.031529 0.009470 0.348022
v 0.037911 0.028715 0.356118
v 0.029725 0.018205 0.349644
v 0.026919 0.014547 0.342875
v 0.027555 0.028715 0.351173
v 0.020804 0.028250 0.342244
v 0.022181 0.015612 0.328602
v 0.021652 0.015612 0.315500
v 0.018867 0.023638 0.328602
v 0.018602 0.022998 0.315500
v 0.064116 0.041817 0.358623
v 0.064116 0.054919 0.358623
v 0.051013 0.041817 0.358623
v 0.051013 0.054919 0.358623
v 0.064116 0.068022 0.358623
v 0.064116 0.081124 0.358623
v 0.051013 0.068022 0.358623
v 0.051013 0.081124 0.358623
v 0.037911 0.041817 0.357564
v 0.037911 0.054919 0.358185
v 0.024056 0.041857 0.352107
v 0.019187 0.037516 0.346970
v 0.024809 0.054919 0.355214
v 0.037911 0.068022 0.358528
v 0.037911 0.081124 0.358623
v 0.024809 0.068022 0.357012
v 0.024809 0.081124 0.357975
v 0.111741 0.091811 0.349720
v 0.114628 0.095397 0.342933
v 0.111669 0.107329 0.339011
v 0.104674 0.095397 0.352716
v 0.109875 0.100546 0.348120
v 0.101875 0.107329 0.351758
v 0.108427 0.107329 0.345562
v 0.119492 0.094226 0.328602
v 0.120023 0.094226 0.315500
v 0.113896 0.107329 0.328602
v 0.114427 0.107329 0.315500
v 0.110171 0.114342 0.336065
v 0.099077 0.120431 0.350179
v 0.105497 0.119398 0.340941
v 0.097409 0.128241 0.348965
v 0.099314 0.132978 0.341918
v 0.110536 0.115195 0.328602
v 0.110802 0.115818 0.315500
v 0.107738 0.121746 0.328602
v 0.108004 0.122369 0.315500
v 0.102703 0.133533 0.328602
v 0.103235 0.133533 0.315500
v 0.090321 0.094226 0.357917
v 0.090321 0.107329 0.356804
v 0.077218 0.094226 0.358623
v 0.077218 0.107329 0.358486
v 0.090321 0.120431 0.354832
v 0.090834 0.132978 0.351788
v 0.095544 0.136976 0.346428
v 0.077218 0.120431 0.358092
v 0.077218 0.133533 0.357272
v 0.097706 0.142037 0.337693
v 0.098388 0.143636 0.328602
v 0.098654 0.144258 0.315500
v 0.086930 0.146636 0.350766
v 0.093541 0.146497 0.341918
v 0.084944 0.155936 0.349356
v 0.087358 0.160078 0.342444
v 0.077218 0.146636 0.355593
v 0.078114 0.160078 0.352327
v 0.083078 0.164671 0.347305
v 0.095590 0.150187 0.328602
v 0.095856 0.150809 0.315500
v 0.091511 0.159738 0.328602
v 0.092043 0.159738 0.315500
v 0.085240 0.169732 0.338570
v 0.074783 0.172840 0.351353
v 0.081584 0.173596 0.342444
v 0.072478 0.183632 0.349747
v 0.075402 0.187177 0.342970
v 0.086241 0.172076 0.328602
v 0.086507 0.172699 0.315500
v 0.083443 0.178628 0.328602
v 0.083709 0.179250 0.315500
v 0.080319 0.185943 0.328602
v 0.080850 0.185943 0.315500
v 0.064116 0.094226 0.358623
v 0.064116 0.107329 0.358623
v 0.051013 0.094226 0.358623
v 0.051013 0.107329 0.358623
v 0.064116 0.120431 0.358623
v 0.064116 0.133533 0.358573
v 0.051013 0.120431 0.358623
v 0.051013 0.133533 0.358623
v 0.037911 0.094226 0.358623
v 0.037911 0.107329 0.358623
v 0.024809 0.094226 0.358423
v 0.024809 0.107329 0.358623
v 0.037911 0.120431 0.358623
v 0.037911 0.133533 0.358623
v 0.024809 0.120431 0.358623
v 0.024809 0.133533 0.358623
v 0.064116 0.146636 0.358267
v 0.064116 0.159738 0.357703
v 0.051013 0.146636 0.358623
v 0.051013 0.159738 0.358623
v 0.064116 0.172840 0.356317
v 0.065393 0.187177 0.352743
v 0.070613 0.192367 0.348181
v 0.051013 0.172840 0.358404
v 0.051013 0.185943 0.357929
v 0.037911 0.146636 0.358623
v 0.037911 0.159738 0.358623
v 0.024809 0.146636 0.358623
v 0.024809 0.159738 0.358623
v 0.037911 0.172840 0.358623
v 0.037911 0.185943 0.358623
v 0.024809 0.172840 0.358623
v 0.024809 0.185943 0.358623
v 0.072429 0.199045 0.339211
v 0.070909 0.206163 0.336271
v 0.074722 0.199045 0.328602
v 0.075254 0.199045 0.315500
v 0.071296 0.207068 0.328602
v 0.071562 0.207691 0.315500
v 0.062635 0.199045 0.351785
v 0.069186 0.199045 0.345762
v 0.059837 0.212147 0.350220
v 0.066270 0.211177 0.341065
v 0.051013 0.199045 0.356837
v 0.051013 0.212147 0.354885
v 0.068498 0.213619 0.328602
v 0.068763 0.214242 0.315500
v 0.058147 0.220062 0.348993
v 0.060088 0.224758 0.341955
v 0.058443 0.233858 0.337755
v 0.051554 0.224758 0.351825
v 0.056282 0.228797 0.346490
v 0.047690 0.238352 0.350807
v 0.054314 0.238276 0.341955
v 0.063530 0.225250 0.328602
v 0.064062 0.225250 0.315500
v 0.059148 0.235509 0.328602
v 0.059414 0.236131 0.315500
v 0.056350 0.242060 0.328602
v 0.056616 0.242682 0.315500
v 0.037911 0.199045 0.358492
v 0.037911 0.212147 0.358104
v 0.024809 0.199045 0.358623
v 0.024809 0.212147 0.358623
v 0.037911 0.225250 0.357144
v 0.037911 0.238352 0.354180
v 0.024809 0.225250 0.358212
v 0.024809 0.238352 0.355003
v 0.045681 0.246306 0.349384
v 0.047912 0.248499 0.341705
v 0.049799 0.250234 0.328602
v 0.050065 0.250479 0.315500
v 0.037911 0.247008 0.350089
v 0.037911 0.252094 0.341705
v 0.024809 0.247008 0.350230
v 0.024809 0.252094 0.341705
v 0.037911 0.255565 0.328602
v 0.037911 0.256054 0.315500
v 0.024809 0.255565 0.328602
v 0.024809 0.256054 0.315500
v 0.017036 0.032308 0.338235
v -0.007088 0.020235 0.337720
v -0.007319 0.033856 0.349018
v -0.005373 0.029179 0.341934
v 0.016161 0.030189 0.328602
v 0.015897 0.029549 0.315500
v -0.006391 0.018670 0.328602
v -0.006124 0.018069 0.315500
v -0.001918 0.028715 0.328602
v -0.001382 0.028715 0.315500
v -0.019713 -0.007042 0.338373
v -0.019944 0.006579 0.349310
v -0.017616 0.002331 0.342326
v -0.030319 -0.010592 0.351163
v -0.023589 -0.011082 0.342326
v -0.026794 0.002331 0.352224
v -0.021889 -0.002156 0.347108
v -0.018777 -0.009143 0.328602
v -0.018510 -0.009743 0.315500
v -0.013588 0.002510 0.328602
v -0.013053 0.002510 0.315500
v -0.021695 -0.015694 0.328602
v -0.021428 -0.016294 0.315500
v -0.017933 0.015612 0.350726
v -0.011346 0.015765 0.341934
v -0.013978 0.029179 0.351822
v -0.009264 0.025121 0.346455
v -0.027601 0.015612 0.355534
v -0.027601 0.028715 0.357270
v -0.009309 0.012119 0.328602
v -0.009041 0.011518 0.315500
v 0.017383 0.046251 0.349175
v 0.011908 0.043350 0.340968
v 0.011345 0.056934 0.349834
v 0.007570 0.053407 0.344065
v -0.005547 0.041817 0.350289
v 0.000897 0.042613 0.341445
v -0.001162 0.056027 0.351261
v 0.003361 0.052398 0.345639
v 0.008685 0.042743 0.328602
v 0.008687 0.042343 0.315500
v 0.003078 0.039931 0.328602
v 0.003345 0.039330 0.315500
v 0.010486 0.066711 0.352308
v 0.011706 0.081124 0.356110
v -0.001396 0.068022 0.354200
v -0.001396 0.081124 0.356573
v -0.014498 0.041817 0.354967
v -0.014498 0.054919 0.356922
v -0.027601 0.041817 0.358117
v -0.027601 0.054919 0.358503
v -0.014498 0.068022 0.357986
v -0.014498 0.081124 0.358438
v -0.027601 0.068022 0.358623
v -0.027601 0.081124 0.358623
v -0.040703 -0.010592 0.356091
v -0.040703 0.002510 0.357609
v -0.053805 -0.010592 0.358367
v -0.053805 0.002510 0.358623
v -0.040703 0.015612 0.358247
v -0.040703 0.028715 0.358568
v -0.053805 0.015612 0.358623
v -0.053805 0.028715 0.358623
v -0.066908 -0.010592 0.358623
v -0.066908 0.002510 0.358623
v -0.080010 -0.010592 0.358623
v -0.080010 0.002510 0.358623
v -0.066908 0.015612 0.358623
v -0.066908 0.028715 0.358623
v -0.080010 0.015612 0.358623
v -0.080010 0.028715 0.358623
v -0.040703 0.041817 0.358623
v -0.040703 0.054919 0.358623
v -0.053805 0.041817 0.358623
v -0.053805 0.054919 0.358623
v -0.040703 0.068022 0.358623
v -0.040703 0.081124 0.358623
v -0.053805 0.068022 0.358623
v -0.053805 0.081124 0.358623
v -0.066908 0.041817 0.358623
v -0.066908 0.054919 0.358623
v -0.080010 0.041817 0.358623
v -0.080010 0.054919 0.358623
v -0.066908 0.068022 0.358623
v -0.066908 0.081124 0.358623
v -0.080010 0.068022 0.358546
v -0.080010 0.081124 0.358204
v 0.011706 0.094226 0.357657
v 0.011706 0.107329 0.358372
v -0.001396 0.094226 0.357856
v -0.001396 0.107329 0.358372
v 0.011706 0.120431 0.358623
v 0.011706 0.133533 0.358623
v -0.001396 0.120431 0.358623
v -0.001396 0.133533 0.358623
v -0.014498 0.094226 0.358623
v -0.014498 0.107329 0.358623
v -0.027601 0.094226 0.358623
v -0.027601 0.107329 0.358623
v -0.014498 0.120431 0.358623
v -0.014498 0.133533 0.358623
v -0.027601 0.120431 0.358623
v -0.027601 0.133533 0.358623
v 0.011706 0.146636 0.358623
v 0.011706 0.159738 0.358623
v -0.001396 0.146636 0.358623
v -0.001396 0.159738 0.358623
v 0.011706 0.172840 0.358623
v 0.011706 0.185943 0.358623
v -0.001396 0.172840 0.358623
v -0.001396 0.185943 0.358623
v -0.014498 0.146636 0.358623
v -0.014498 0.159738 0.358623
v -0.027601 0.146636 0.358623
v -0.027601 0.159738 0.358623
v -0.014498 0.172840 0.358623
v -0.014498 0.185943 0.358623
v -0.027601 0.172840 0.358623
v -0.027601 0.185943 0.358545
v -0.040703 0.094226 0.358623
v -0.040703 0.107329 0.358623
v -0.053805 0.094226 0.358623
v -0.053805 0.107329 0.358623
v -0.040703 0.120431 0.358623
v -0.040703 0.133533 0.358623
v -0.053805 0.120431 0.358623
v -0.053805 0.133533 0.358413
v -0.066908 0.094226 0.358612
v -0.066908 0.107329 0.358337
v -0.080010 0.094226 0.357508
v -0.080010 0.107329 0.355922
v -0.066908 0.120431 0.357806
v -0.066908 0.133533 0.356442
v -0.081015 0.121054 0.352501
v -0.086052 0.125837 0.347559
v -0.077790 0.133533 0.351468
v -0.084619 0.134471 0.342597
v -0.086285 0.139464 0.333887
v -0.040703 0.146636 0.358623
v -0.040703 0.159738 0.358479
v -0.053805 0.146636 0.357939
v -0.053805 0.159738 0.356796
v -0.040703 0.172840 0.358071
v -0.040703 0.185943 0.357149
v -0.053805 0.172840 0.354741
v -0.054225 0.185251 0.351662
v -0.058873 0.189158 0.346226
v -0.068203 0.147912 0.352784
v -0.073433 0.153130 0.348221
v -0.065413 0.159738 0.351756
v -0.071964 0.159738 0.345670
v -0.075375 0.144395 0.349805
v -0.078353 0.147912 0.342994
v -0.075227 0.159738 0.339119
v -0.083948 0.145435 0.329153
v -0.083770 0.146908 0.315500
v -0.077530 0.159738 0.328602
v -0.078066 0.159738 0.315500
v -0.062501 0.172840 0.350109
v -0.068893 0.171811 0.340967
v -0.060815 0.180423 0.348883
v -0.062627 0.185251 0.341797
v -0.073667 0.166757 0.336108
v -0.071125 0.174143 0.328602
v -0.071393 0.174745 0.315500
v -0.065879 0.185943 0.328602
v -0.066415 0.185943 0.315500
v -0.074038 0.167592 0.328602
v -0.074306 0.168194 0.315500
v -0.093112 -0.010592 0.358623
v -0.093112 0.002510 0.358623
v -0.106215 -0.010592 0.358623
v -0.106215 0.002510 0.358623
v -0.093112 0.015612 0.358623
v -0.093112 0.028715 0.358623
v -0.106215 0.015612 0.358414
v -0.106215 0.028715 0.357940
v -0.119317 -0.010592 0.358338
v -0.119317 0.002510 0.357808
v -0.132419 -0.010592 0.355929
v -0.133428 0.003141 0.352505
v -0.138467 0.007930 0.347568
v -0.119317 0.015612 0.356447
v -0.120616 0.029999 0.352788
v -0.125849 0.035223 0.348230
v -0.130208 0.015612 0.351472
v -0.137040 0.016559 0.342602
v -0.127791 0.026488 0.349809
v -0.130774 0.029999 0.342999
v -0.138701 0.021557 0.333916
v -0.136369 0.027522 0.329170
v -0.136189 0.029009 0.315500
v -0.093112 0.041817 0.358480
v -0.093112 0.054919 0.358072
v -0.106215 0.041817 0.356801
v -0.106215 0.054919 0.354752
v -0.093112 0.068022 0.357154
v -0.093112 0.081124 0.355347
v -0.106639 0.067338 0.351670
v -0.111289 0.071251 0.346235
v -0.102543 0.081124 0.350582
v -0.109082 0.080756 0.341802
v -0.111168 0.084081 0.328602
v -0.111436 0.084683 0.315500
v -0.117832 0.041817 0.351760
v -0.124383 0.041817 0.345698
v -0.114919 0.054919 0.350119
v -0.121313 0.053898 0.340985
v -0.127646 0.041817 0.339147
v -0.126082 0.048850 0.336137
v -0.123544 0.056244 0.328602
v -0.123812 0.056846 0.315500
v -0.129959 0.041817 0.328602
v -0.130494 0.041817 0.315500
v -0.126457 0.049693 0.328602
v -0.126725 0.050295 0.315500
v -0.113230 0.062516 0.348892
v -0.115047 0.067338 0.341802
v -0.113464 0.076143 0.337500
v -0.118308 0.068022 0.328602
v -0.118843 0.068022 0.315500
v -0.114081 0.077530 0.328602
v -0.114348 0.078132 0.315500
v -0.142585 -0.010592 0.351031
v -0.149271 -0.010299 0.342205
v -0.140409 -0.000805 0.349513
v -0.143005 0.003141 0.342602
v -0.153261 -0.014471 0.338171
v -0.151210 -0.005981 0.328602
v -0.151478 -0.005379 0.315500
v -0.147435 0.002510 0.328602
v -0.147970 0.002510 0.315500
v -0.154123 -0.012532 0.328602
v -0.154391 -0.011930 0.315500
v -0.140643 0.012822 0.338833
v -0.141244 0.016559 0.329170
v -0.142145 0.015612 0.315500
v -0.139058 0.022360 0.325181
v -0.139101 0.022458 0.315500
v -0.093827 0.094196 0.352094
v -0.098670 0.098544 0.346897
v -0.090166 0.107329 0.351025
v -0.096851 0.107613 0.342199
v -0.100612 0.089809 0.349214
v -0.102816 0.094196 0.342200
v -0.100845 0.103436 0.338162
v -0.098791 0.111918 0.328602
v -0.099059 0.112520 0.315500
v -0.106657 0.094226 0.328602
v -0.107193 0.094226 0.315500
v -0.101704 0.105367 0.328602
v -0.101972 0.105969 0.315500
v -0.087994 0.117102 0.349510
v -0.090585 0.121054 0.342597
v -0.088227 0.130729 0.338824
v -0.095006 0.120431 0.328602
v -0.095542 0.120431 0.315500
v -0.088823 0.134471 0.329153
v -0.089716 0.133533 0.315500
v -0.086642 0.140266 0.325152
v -0.086682 0.140357 0.315500
v 0.011706 0.199045 0.358623
v 0.011706 0.212147 0.358623
v -0.001396 0.199045 0.358623
v -0.001396 0.212147 0.358623
v 0.011706 0.225250 0.358212
v 0.011706 0.238352 0.355003
v -0.001396 0.225250 0.358212
v -0.001396 0.238352 0.355003
v -0.014498 0.199045 0.358623
v -0.014498 0.212147 0.358611
v -0.027601 0.199045 0.358203
v -0.027601 0.212147 0.357503
v -0.014498 0.225250 0.358129
v -0.014498 0.238352 0.354932
v -0.027601 0.225250 0.355914
v -0.028602 0.238967 0.351648
v -0.033636 0.243744 0.347551
v 0.011706 0.247008 0.350230
v 0.011706 0.252094 0.341705
v -0.001396 0.247008 0.350230
v -0.001396 0.252094 0.341705
v 0.011706 0.255565 0.328602
v 0.011706 0.256054 0.315500
v -0.001396 0.255565 0.328602
v -0.001396 0.256054 0.315500
v -0.014498 0.247008 0.350230
v -0.014498 0.252094 0.341705
v -0.024901 0.246306 0.349572
v -0.028602 0.249814 0.342592
v -0.014498 0.255565 0.328602
v -0.014498 0.256054 0.315500
v -0.027601 0.255565 0.328602
v -0.027601 0.256054 0.315500
v -0.040703 0.199045 0.355339
v -0.041414 0.212109 0.352089
v -0.046255 0.216451 0.346888
v -0.050124 0.199045 0.350576
v -0.056661 0.198668 0.341797
v -0.048196 0.207716 0.349210
v -0.050395 0.212109 0.342194
v -0.058749 0.201981 0.328602
v -0.059016 0.202583 0.315500
v -0.054229 0.212147 0.328602
v -0.054764 0.212147 0.315500
v -0.037748 0.225250 0.351019
v -0.044430 0.225526 0.342194
v -0.035578 0.235009 0.349505
v -0.038164 0.238967 0.342592
v -0.048430 0.221343 0.338154
v -0.046372 0.229818 0.328602
v -0.046640 0.230420 0.315500
v -0.042578 0.238352 0.328602
v -0.043113 0.238352 0.315500
v -0.049285 0.223267 0.328602
v -0.049553 0.223868 0.315500
v -0.061048 0.194050 0.337491
v -0.061661 0.195430 0.328602
v -0.061929 0.196031 0.315500
v -0.035811 0.248294 0.338816
v -0.036909 0.250234 0.328602
v -0.037176 0.250479 0.315500
v 0.164987 -0.011047 0.302398
v 0.164721 -0.011670 0.289295
v 0.162189 -0.004496 0.302398
v 0.161923 -0.005119 0.289295
v 0.159197 0.002510 0.302398
v 0.158665 0.002510 0.289295
v 0.163765 -0.013910 0.279452
v 0.160036 -0.009962 0.275528
v 0.153262 -0.010592 0.266629
v 0.153854 0.003617 0.275002
v 0.151002 -0.000012 0.268206
v 0.153601 0.015612 0.302398
v 0.153068 0.015612 0.289295
v 0.150042 0.023944 0.302398
v 0.149776 0.023322 0.289295
v 0.150909 0.015612 0.279089
v 0.149434 0.022520 0.282040
v 0.142730 -0.010592 0.261678
v 0.149137 0.008723 0.269840
v 0.143953 0.003617 0.265209
v 0.129628 -0.010592 0.259509
v 0.129628 0.002510 0.259996
v 0.147244 0.030496 0.302398
v 0.146978 0.029873 0.289295
v 0.147666 0.015612 0.272538
v 0.141114 0.015612 0.266168
v 0.144722 0.027619 0.277081
v 0.138316 0.028715 0.267763
v 0.129628 0.015612 0.261129
v 0.129628 0.028715 0.263125
v 0.142408 0.041817 0.302398
v 0.141876 0.041817 0.289295
v 0.137894 0.052385 0.302398
v 0.137628 0.051762 0.289295
v 0.135096 0.058936 0.302398
v 0.134830 0.058314 0.289295
v 0.138540 0.041198 0.276017
v 0.136671 0.036418 0.268964
v 0.136968 0.050216 0.280267
v 0.134806 0.045153 0.271532
v 0.130114 0.041198 0.266152
v 0.132766 0.054718 0.276017
v 0.126169 0.054919 0.267174
v 0.131216 0.068022 0.302398
v 0.130684 0.068022 0.289295
v 0.125747 0.080826 0.302398
v 0.125481 0.080203 0.289295
v 0.126584 0.068297 0.275491
v 0.124205 0.064114 0.268569
v 0.124502 0.077911 0.279390
v 0.116525 -0.010592 0.259278
v 0.116525 0.002510 0.259278
v 0.103423 -0.010592 0.259278
v 0.103423 0.002510 0.259278
v 0.116525 0.015612 0.259421
v 0.116525 0.028715 0.259821
v 0.103423 0.015612 0.259278
v 0.103423 0.028715 0.259278
v 0.090321 -0.010592 0.259278
v 0.090321 0.002510 0.259278
v 0.077218 -0.010592 0.259278
v 0.077218 0.002510 0.259278
v 0.090321 0.015612 0.259278
v 0.090321 0.028715 0.259278
v 0.077218 0.015612 0.259278
v 0.077218 0.028715 0.259278
v 0.116525 0.041817 0.260662
v 0.116525 0.054919 0.262361
v 0.103423 0.041817 0.259334
v 0.103423 0.054919 0.259646
v 0.122949 0.087377 0.302398
v 0.122683 0.086754 0.289295
v 0.122340 0.072849 0.270656
v 0.117394 0.068297 0.265610
v 0.120810 0.081817 0.275491
v 0.114022 0.081124 0.266588
v 0.103423 0.068022 0.260225
v 0.103423 0.081124 0.261631
v 0.090321 0.041817 0.259278
v 0.090321 0.054919 0.259278
v 0.077218 0.041817 0.259278
v 0.077218 0.054919 0.259278
v 0.090321 0.068022 0.259278
v 0.090321 0.081124 0.259502
v 0.077218 0.068022 0.259278
v 0.077218 0.081124 0.259278
v 0.064116 -0.010592 0.259795
v 0.064116 0.002510 0.259412
v 0.051013 -0.010592 0.263027
v 0.051013 0.002510 0.261098
v 0.064116 0.015612 0.259278
v 0.064116 0.028715 0.259278
v 0.051013 0.015612 0.260004
v 0.051013 0.028715 0.259516
v 0.033269 -0.012520 0.302398
v 0.033534 -0.011880 0.289295
v 0.030564 -0.005969 0.302398
v 0.030828 -0.005328 0.289295
v 0.027063 0.002510 0.302398
v 0.027591 0.002510 0.289295
v 0.035786 -0.009541 0.277007
v 0.042224 -0.010592 0.267692
v 0.032967 0.002510 0.272474
v 0.039519 0.002510 0.266146
v 0.031182 -0.004472 0.281917
v 0.029740 0.002510 0.279025
v 0.021652 0.015612 0.302398
v 0.022181 0.015612 0.289295
v 0.018602 0.022998 0.302398
v 0.018867 0.023638 0.289295
v 0.031530 0.009472 0.269877
v 0.036703 0.014549 0.265245
v 0.037911 0.028715 0.261783
v 0.026920 0.014549 0.275024
v 0.029726 0.018207 0.268255
v 0.020805 0.028250 0.275655
v 0.027557 0.028715 0.266726
v 0.064116 0.041817 0.259278
v 0.064116 0.054919 0.259278
v 0.051013 0.041817 0.259278
v 0.051013 0.054919 0.259278
v 0.064116 0.068022 0.259278
v 0.064116 0.081124 0.259278
v 0.051013 0.068022 0.259278
v 0.051013 0.081124 0.259278
v 0.037911 0.041817 0.260337
v 0.037911 0.054919 0.259716
v 0.019188 0.037519 0.270928
v 0.024057 0.041858 0.265793
v 0.024809 0.054919 0.262687
v 0.037911 0.068022 0.259372
v 0.037911 0.081124 0.259278
v 0.024809 0.068022 0.260889
v 0.024809 0.081124 0.259926
v 0.120023 0.094226 0.302398
v 0.119492 0.094226 0.289295
v 0.114427 0.107329 0.302398
v 0.113895 0.107329 0.289295
v 0.114628 0.095396 0.274965
v 0.111740 0.091809 0.268179
v 0.111669 0.107329 0.278889
v 0.109874 0.100544 0.269779
v 0.104673 0.095396 0.265183
v 0.108425 0.107329 0.272338
v 0.101874 0.107329 0.266141
v 0.110802 0.115818 0.302398
v 0.110536 0.115195 0.289295
v 0.108004 0.122369 0.302398
v 0.107738 0.121746 0.289295
v 0.103235 0.133533 0.302398
v 0.102703 0.133533 0.289295
v 0.110171 0.114341 0.281834
v 0.105496 0.119398 0.276957
v 0.099076 0.120431 0.267720
v 0.099313 0.132977 0.275980
v 0.097409 0.128239 0.268933
v 0.090321 0.094226 0.259984
v 0.090321 0.107329 0.261097
v 0.077218 0.094226 0.259278
v 0.077218 0.107329 0.259415
v 0.090321 0.120431 0.263069
v 0.095543 0.136974 0.271470
v 0.090834 0.132977 0.266112
v 0.077218 0.120431 0.259809
v 0.077218 0.133533 0.260629
v 0.098654 0.144258 0.302398
v 0.098388 0.143635 0.289295
v 0.097705 0.142036 0.280205
v 0.095856 0.150809 0.302398
v 0.095590 0.150186 0.289295
v 0.092043 0.159738 0.302398
v 0.091511 0.159738 0.289295
v 0.093539 0.146497 0.275980
v 0.086929 0.146636 0.267133
v 0.087357 0.160077 0.275454
v 0.084943 0.155935 0.268542
v 0.077218 0.146636 0.262308
v 0.083078 0.164670 0.270594
v 0.078113 0.160077 0.265572
v 0.086507 0.172699 0.302398
v 0.086241 0.172076 0.289295
v 0.083709 0.179250 0.302398
v 0.083443 0.178627 0.289295
v 0.080850 0.185943 0.302398
v 0.080318 0.185943 0.289295
v 0.085240 0.169732 0.279329
v 0.081583 0.173596 0.275454
v 0.074781 0.172840 0.266547
v 0.075401 0.187176 0.274928
v 0.072477 0.183630 0.268151
v 0.064116 0.094226 0.259278
v 0.064116 0.107329 0.259278
v 0.051013 0.094226 0.259278
v 0.051013 0.107329 0.259278
v 0.064116 0.120431 0.259278
v 0.064116 0.133533 0.259328
v 0.051013 0.120431 0.259278
v 0.051013 0.133533 0.259278
v 0.037911 0.094226 0.259278
v 0.037911 0.107329 0.259278
v 0.024809 0.094226 0.259477
v 0.024809 0.107329 0.259278
v 0.037911 0.120431 0.259278
v 0.037911 0.133533 0.259278
v 0.024809 0.120431 0.259278
v 0.024809 0.133533 0.259278
v 0.064116 0.146636 0.259634
v 0.064116 0.159738 0.260198
v 0.051013 0.146636 0.259278
v 0.051013 0.159738 0.259278
v 0.064116 0.172840 0.261584
v 0.070612 0.192365 0.269718
v 0.065393 0.187176 0.265157
v 0.051013 0.172840 0.259497
v 0.051013 0.185943 0.259972
v 0.037911 0.146636 0.259278
v 0.037911 0.159738 0.259278
v 0.024809 0.146636 0.259278
v 0.024809 0.159738 0.259278
v 0.037911 0.172840 0.259278
v 0.037911 0.185943 0.259278
v 0.024809 0.172840 0.259278
v 0.024809 0.185943 0.259278
v 0.075254 0.199045 0.302398
v 0.074722 0.199045 0.289295
v 0.071562 0.207691 0.302398
v 0.071295 0.207068 0.289295
v 0.072429 0.199045 0.278688
v 0.070909 0.206162 0.281628
v 0.068763 0.214242 0.302398
v 0.068498 0.213619 0.289295
v 0.069185 0.199045 0.272137
v 0.062634 0.199045 0.266115
v 0.066269 0.211177 0.276833
v 0.059836 0.212147 0.267679
v 0.051013 0.199045 0.261064
v 0.051013 0.212147 0.263016
v 0.064062 0.225250 0.302398
v 0.063530 0.225250 0.289295
v 0.059414 0.236131 0.302398
v 0.059148 0.235508 0.289295
v 0.056616 0.242682 0.302398
v 0.056350 0.242060 0.289295
v 0.060087 0.224757 0.275943
v 0.058146 0.220060 0.268906
v 0.058443 0.233857 0.280144
v 0.056281 0.228795 0.271409
v 0.051553 0.224757 0.266074
v 0.054312 0.238276 0.275943
v 0.047689 0.238352 0.267092
v 0.037911 0.199045 0.259409
v 0.037911 0.212147 0.259797
v 0.024809 0.199045 0.259278
v 0.024809 0.212147 0.259278
v 0.037911 0.225250 0.260757
v 0.037911 0.238352 0.263720
v 0.024809 0.225250 0.259689
v 0.024809 0.238352 0.262898
v 0.050065 0.250479 0.302398
v 0.049799 0.250234 0.289295
v 0.047911 0.248498 0.276193
v 0.045681 0.246306 0.268515
v 0.037911 0.256054 0.302398
v 0.037911 0.255565 0.289295
v 0.024809 0.256054 0.302398
v 0.024809 0.255565 0.289295
v 0.037911 0.252093 0.276193
v 0.037911 0.247007 0.267810
v 0.024809 0.252093 0.276193
v 0.024809 0.247007 0.267669
v 0.015897 0.029549 0.302398
v 0.016161 0.030190 0.289295
v -0.006124 0.018069 0.302398
v -0.006391 0.018670 0.289295
v -0.001382 0.028715 0.302398
v -0.001918 0.028715 0.289295
v 0.017036 0.032309 0.279664
v -0.007088 0.020235 0.280179
v -0.005373 0.029180 0.275964
v -0.007320 0.033858 0.268881
v -0.018510 -0.009743 0.302398
v -0.018777 -0.009143 0.289295
v -0.013053 0.002510 0.302398
v -0.013588 0.002510 0.289295
v -0.021428 -0.016294 0.302398
v -0.021695 -0.015694 0.289295
v -0.019713 -0.007042 0.279526
v -0.017616 0.002332 0.275572
v -0.019945 0.006581 0.268589
v -0.023590 -0.011082 0.275572
v -0.030320 -0.010592 0.266736
v -0.021890 -0.002154 0.270791
v -0.026795 0.002332 0.265676
v -0.009041 0.011518 0.302398
v -0.009309 0.012119 0.289295
v -0.011347 0.015765 0.275964
v -0.017934 0.015612 0.267173
v -0.009265 0.025123 0.271444
v -0.013979 0.029180 0.266077
v -0.027601 0.015612 0.262367
v -0.027601 0.028715 0.260631
v 0.008687 0.042343 0.302398
v 0.008685 0.042744 0.289295
v 0.003345 0.039330 0.302398
v 0.003078 0.039931 0.289295
v 0.011908 0.043351 0.276931
v 0.017384 0.046253 0.268724
v 0.007570 0.053408 0.273833
v 0.011345 0.056935 0.268065
v 0.000895 0.042613 0.276453
v -0.005548 0.041817 0.267610
v 0.003360 0.052400 0.272259
v -0.001163 0.056028 0.266638
v 0.010486 0.066711 0.265593
v 0.011706 0.081124 0.261791
v -0.001396 0.068022 0.263701
v -0.001396 0.081124 0.261328
v -0.014498 0.041817 0.262935
v -0.014498 0.054919 0.260979
v -0.027601 0.041817 0.259784
v -0.027601 0.054919 0.259398
v -0.014498 0.068022 0.259914
v -0.014498 0.081124 0.259463
v -0.027601 0.068022 0.259278
v -0.027601 0.081124 0.259278
v -0.040703 -0.010592 0.261810
v -0.040703 0.002510 0.260292
v -0.053805 -0.010592 0.259533
v -0.053805 0.002510 0.259278
v -0.040703 0.015612 0.259654
v -0.040703 0.028715 0.259333
v -0.053805 0.015612 0.259278
v -0.053805 0.028715 0.259278
v -0.066908 -0.010592 0.259278
v -0.066908 0.002510 0.259278
v -0.080010 -0.010592 0.259278
v -0.080010 0.002510 0.259278
v -0.066908 0.015612 0.259278
v -0.066908 0.028715 0.259278
v -0.080010 0.015612 0.259278
v -0.080010 0.028715 0.259278
v -0.040703 0.041817 0.259278
v -0.040703 0.054919 0.259278
v -0.053805 0.041817 0.259278
v -0.053805 0.054919 0.259278
v -0.040703 0.068022 0.259278
v -0.040703 0.081124 0.259278
v -0.053805 0.068022 0.259278
v -0.053805 0.081124 0.259278
v -0.066908 0.041817 0.259278
v -0.066908 0.054919 0.259278
v -0.080010 0.041817 0.259278
v -0.080010 0.054919 0.259278
v -0.066908 0.068022 0.259278
v -0.066908 0.081124 0.259278
v -0.080010 0.068022 0.259355
v -0.080010 0.081124 0.259697
v 0.011706 0.094226 0.260244
v 0.011706 0.107329 0.259529
v -0.001396 0.094226 0.260045
v -0.001396 0.107329 0.259529
v 0.011706 0.120431 0.259278
v 0.011706 0.133533 0.259278
v -0.001396 0.120431 0.259278
v -0.001396 0.133533 0.259278
v -0.014498 0.094226 0.259278
v -0.014498 0.107329 0.259278
v -0.027601 0.094226 0.259278
v -0.027601 0.107329 0.259278
v -0.014498 0.120431 0.259278
v -0.014498 0.133533 0.259278
v -0.027601 0.120431 0.259278
v -0.027601 0.133533 0.259278
v 0.011706 0.146636 0.259278
v 0.011706 0.159738 0.259278
v -0.001396 0.146636 0.259278
v -0.001396 0.159738 0.259278
v 0.011706 0.172840 0.259278
v 0.011706 0.185943 0.259278
v -0.001396 0.172840 0.259278
v -0.001396 0.185943 0.259278
v -0.014498 0.146636 0.259278
v -0.014498 0.159738 0.259278
v -0.027601 0.146636 0.259278
v -0.027601 0.159738 0.259278
v -0.014498 0.172840 0.259278
v -0.014498 0.185943 0.259278
v -0.027601 0.172840 0.259278
v -0.027601 0.185943 0.259355
v -0.040703 0.094226 0.259278
v -0.040703 0.107329 0.259278
v -0.053805 0.094226 0.259278
v -0.053805 0.107329 0.259278
v -0.040703 0.120431 0.259278
v -0.040703 0.133533 0.259278
v -0.053805 0.120431 0.259278
v -0.053805 0.133533 0.259488
v -0.066908 0.094226 0.259289
v -0.066908 0.107329 0.259565
v -0.080010 0.094226 0.260393
v -0.080010 0.107329 0.261979
v -0.086285 0.139463 0.284012
v -0.066908 0.120431 0.260095
v -0.066908 0.133533 0.261459
v -0.086051 0.125835 0.270340
v -0.081014 0.121053 0.265399
v -0.084618 0.134471 0.275302
v -0.077789 0.133533 0.266431
v -0.040703 0.146636 0.259278
v -0.040703 0.159738 0.259421
v -0.053805 0.146636 0.259962
v -0.053805 0.159738 0.261105
v -0.040703 0.172840 0.259830
v -0.040703 0.185943 0.260752
v -0.053805 0.172840 0.263160
v -0.058872 0.189156 0.271673
v -0.054225 0.185250 0.266237
v -0.083770 0.146908 0.302398
v -0.083948 0.145435 0.288746
v -0.078066 0.159738 0.302398
v -0.077530 0.159738 0.289295
v -0.073433 0.153128 0.269678
v -0.068202 0.147911 0.265115
v -0.071963 0.159738 0.272229
v -0.065412 0.159738 0.266143
v -0.078353 0.147911 0.274904
v -0.075374 0.144393 0.268094
v -0.075227 0.159738 0.278780
v -0.071393 0.174745 0.302398
v -0.071125 0.174143 0.289295
v -0.066415 0.185943 0.302398
v -0.065879 0.185943 0.289295
v -0.074306 0.168194 0.302398
v -0.074038 0.167592 0.289295
v -0.068892 0.171810 0.276931
v -0.062499 0.172840 0.267790
v -0.062626 0.185250 0.276101
v -0.060814 0.180421 0.269016
v -0.073666 0.166756 0.281791
v -0.093112 -0.010592 0.259278
v -0.093112 0.002510 0.259278
v -0.106215 -0.010592 0.259278
v -0.106215 0.002510 0.259278
v -0.093112 0.015612 0.259278
v -0.093112 0.028715 0.259278
v -0.106215 0.015612 0.259487
v -0.106215 0.028715 0.259961
v -0.119317 -0.010592 0.259563
v -0.119317 0.002510 0.260093
v -0.132419 -0.010592 0.261971
v -0.138467 0.007928 0.270331
v -0.133427 0.003140 0.265395
v -0.138701 0.021557 0.283982
v -0.136189 0.029009 0.302398
v -0.136369 0.027522 0.288728
v -0.119317 0.015612 0.261454
v -0.125848 0.035221 0.269669
v -0.120615 0.029998 0.265112
v -0.137039 0.016559 0.275296
v -0.130207 0.015612 0.266427
v -0.130773 0.029998 0.274899
v -0.127790 0.026486 0.268090
v -0.093112 0.041817 0.259421
v -0.093112 0.054919 0.259829
v -0.106215 0.041817 0.261101
v -0.106215 0.054919 0.263149
v -0.111436 0.084683 0.302398
v -0.111168 0.084081 0.289295
v -0.093112 0.068022 0.260747
v -0.093112 0.081124 0.262554
v -0.111288 0.071249 0.271664
v -0.106638 0.067338 0.266229
v -0.109081 0.080756 0.276096
v -0.102542 0.081124 0.267317
v -0.123812 0.056846 0.302398
v -0.123544 0.056244 0.289295
v -0.130494 0.041817 0.302398
v -0.129959 0.041817 0.289295
v -0.126725 0.050295 0.302398
v -0.126457 0.049693 0.289295
v -0.124382 0.041817 0.272201
v -0.117831 0.041817 0.266140
v -0.121313 0.053898 0.276914
v -0.114918 0.054919 0.267781
v -0.127646 0.041817 0.278752
v -0.126082 0.048850 0.281762
v -0.118843 0.068022 0.302398
v -0.118308 0.068022 0.289295
v -0.114348 0.078132 0.302398
v -0.114081 0.077530 0.289295
v -0.115047 0.067338 0.276096
v -0.113230 0.062514 0.269007
v -0.113464 0.076143 0.280399
v -0.151478 -0.005379 0.302398
v -0.151210 -0.005981 0.289295
v -0.147970 0.002510 0.302398
v -0.147435 0.002510 0.289295
v -0.154391 -0.011930 0.302398
v -0.154123 -0.012532 0.289295
v -0.149270 -0.010299 0.275694
v -0.142584 -0.010592 0.266868
v -0.143005 0.003140 0.275296
v -0.140409 -0.000807 0.268386
v -0.153261 -0.014471 0.279728
v -0.142145 0.015612 0.302398
v -0.141244 0.016559 0.288728
v -0.139101 0.022458 0.302398
v -0.139058 0.022360 0.292717
v -0.140643 0.012822 0.279066
v -0.099059 0.112520 0.302398
v -0.098791 0.111918 0.289295
v -0.107193 0.094226 0.302398
v -0.106657 0.094226 0.289295
v -0.101972 0.105969 0.302398
v -0.101704 0.105367 0.289295
v -0.098670 0.098542 0.271002
v -0.093826 0.094195 0.265806
v -0.096850 0.107613 0.275699
v -0.090165 0.107329 0.266875
v -0.102816 0.094195 0.275699
v -0.100611 0.089807 0.268685
v -0.100845 0.103436 0.279737
v -0.095542 0.120431 0.302398
v -0.095006 0.120431 0.289295
v -0.089716 0.133533 0.302398
v -0.088823 0.134471 0.288746
v -0.090584 0.121053 0.275302
v -0.087993 0.117100 0.268390
v -0.088227 0.130729 0.279074
v -0.086682 0.140357 0.302398
v -0.086642 0.140266 0.292747
v 0.011706 0.199045 0.259278
v 0.011706 0.212147 0.259278
v -0.001396 0.199045 0.259278
v -0.001396 0.212147 0.259278
v 0.011706 0.225250 0.259689
v 0.011706 0.238352 0.262898
v -0.001396 0.225250 0.259689
v -0.001396 0.238352 0.262898
v -0.014498 0.199045 0.259278
v -0.014498 0.212147 0.259290
v -0.027601 0.199045 0.259698
v -0.027601 0.212147 0.260398
v -0.014498 0.225250 0.259772
v -0.014498 0.238352 0.262969
v -0.027601 0.225250 0.261987
v -0.033635 0.243742 0.270348
v -0.028601 0.238966 0.266252
v 0.011706 0.256054 0.302398
v 0.011706 0.255565 0.289295
v -0.001396 0.256054 0.302398
v -0.001396 0.255565 0.289295
v 0.011706 0.252093 0.276193
v 0.011706 0.247007 0.267669
v -0.001396 0.252093 0.276193
v -0.001396 0.247007 0.267669
v -0.014498 0.256054 0.302398
v -0.014498 0.255565 0.289295
v -0.027601 0.256054 0.302398
v -0.027601 0.255565 0.289295
v -0.014498 0.252093 0.276193
v -0.014498 0.247007 0.267669
v -0.028601 0.249813 0.275307
v -0.024900 0.246306 0.268327
v -0.059016 0.202583 0.302398
v -0.058749 0.201980 0.289295
v -0.054764 0.212147 0.302398
v -0.054228 0.212147 0.289295
v -0.040703 0.199045 0.262562
v -0.046254 0.216449 0.271010
v -0.041413 0.212108 0.265811
v -0.056660 0.198668 0.276101
v -0.050123 0.199045 0.267323
v -0.050395 0.212108 0.275704
v -0.048196 0.207714 0.268689
v -0.046640 0.230420 0.302398
v -0.046372 0.229817 0.289295
v -0.043113 0.238352 0.302398
v -0.042578 0.238352 0.289295
v -0.049553 0.223868 0.302398
v -0.049285 0.223266 0.289295
v -0.044429 0.225526 0.275704
v -0.037746 0.225250 0.266880
v -0.038163 0.238966 0.275307
v -0.035577 0.235007 0.268393
v -0.048429 0.221342 0.279745
v -0.061929 0.196031 0.302398
v -0.061661 0.195429 0.289295
v -0.061048 0.194049 0.280407
v -0.037176 0.250479 0.302398
v -0.036908 0.250234 0.289295
v -0.035811 0.248294 0.279083
v -0.197931 -0.279877 0.349283
v -0.197931 -0.283545 0.341705
v -0.211033 -0.279877 0.349283
v -0.211033 -0.283545 0.341705
v -0.197931 -0.287016 0.328602
v -0.197931 -0.287504 0.315500
v -0.211033 -0.287016 0.328602
v -0.211033 -0.287504 0.315500
v -0.224136 -0.279877 0.349283
v -0.224136 -0.283545 0.341705
v -0.237238 -0.279877 0.349283
v -0.237238 -0.283545 0.341705
v -0.224136 -0.287016 0.328602
v -0.224136 -0.287504 0.315500
v -0.237238 -0.287016 0.328602
v -0.237238 -0.287504 0.315500
v -0.197931 -0.272639 0.353773
v -0.197931 -0.259537 0.357930
v -0.211033 -0.272639 0.353773
v -0.211033 -0.259537 0.357930
v -0.197931 -0.246435 0.358623
v -0.197931 -0.233332 0.358623
v -0.211033 -0.246435 0.358623
v -0.211033 -0.233332 0.358623
v -0.224136 -0.272639 0.353773
v -0.224136 -0.259537 0.357921
v -0.237238 -0.272639 0.353773
v -0.237238 -0.259537 0.357167
v -0.224136 -0.246435 0.358342
v -0.224136 -0.233332 0.357812
v -0.237238 -0.246435 0.355945
v -0.238254 -0.232684 0.352513
v -0.243299 -0.227884 0.347585
v -0.250340 -0.279877 0.349283
v -0.250340 -0.283545 0.341705
v -0.259801 -0.279648 0.348940
v -0.263878 -0.282400 0.341818
v -0.250340 -0.287016 0.328602
v -0.250340 -0.287504 0.315500
v -0.263443 -0.287016 0.328602
v -0.263443 -0.287504 0.315500
v -0.270711 -0.281636 0.337526
v -0.271337 -0.283103 0.328602
v -0.271605 -0.283347 0.315500
v -0.250340 -0.272639 0.352255
v -0.251066 -0.259542 0.352104
v -0.255917 -0.255177 0.346923
v -0.259799 -0.272639 0.349497
v -0.266344 -0.272981 0.341818
v -0.257859 -0.263912 0.349226
v -0.260078 -0.259542 0.342215
v -0.268425 -0.269617 0.328602
v -0.268692 -0.269015 0.315500
v -0.263943 -0.259537 0.328602
v -0.264478 -0.259537 0.315500
v -0.247422 -0.246435 0.351043
v -0.254113 -0.246124 0.342215
v -0.245240 -0.236619 0.349521
v -0.247847 -0.232684 0.342612
v -0.258093 -0.250284 0.338188
v -0.256048 -0.241780 0.328602
v -0.256316 -0.241178 0.315500
v -0.252292 -0.233332 0.328602
v -0.252828 -0.233332 0.315500
v -0.258961 -0.248331 0.328602
v -0.259229 -0.247729 0.315500
v -0.270711 -0.277577 0.337526
v -0.271337 -0.276168 0.328602
v -0.271605 -0.275566 0.315500
v -0.197931 -0.220230 0.358623
v -0.197931 -0.207128 0.358623
v -0.211033 -0.220230 0.358416
v -0.211033 -0.207128 0.357944
v -0.197931 -0.194025 0.358482
v -0.197931 -0.180923 0.358076
v -0.211033 -0.194025 0.356810
v -0.211033 -0.180923 0.354774
v -0.224136 -0.220230 0.356456
v -0.225442 -0.205826 0.352796
v -0.230680 -0.200592 0.348247
v -0.235046 -0.220230 0.351480
v -0.241881 -0.219266 0.342612
v -0.232622 -0.209326 0.349817
v -0.235616 -0.205826 0.343009
v -0.243532 -0.214256 0.333975
v -0.241211 -0.208303 0.329206
v -0.241027 -0.206790 0.315500
v -0.222669 -0.194025 0.351768
v -0.229220 -0.194025 0.345755
v -0.219756 -0.180923 0.350137
v -0.226155 -0.181927 0.341020
v -0.232484 -0.194025 0.339204
v -0.230914 -0.186963 0.336195
v -0.228383 -0.179555 0.328602
v -0.228650 -0.178953 0.315500
v -0.234816 -0.194025 0.328602
v -0.235352 -0.194025 0.315500
v -0.231295 -0.186106 0.328602
v -0.231563 -0.185504 0.315500
v -0.197931 -0.167821 0.357163
v -0.197931 -0.154718 0.355362
v -0.211465 -0.168487 0.351687
v -0.216120 -0.164564 0.346252
v -0.207380 -0.154718 0.350594
v -0.213923 -0.155069 0.341813
v -0.216006 -0.151718 0.328602
v -0.216273 -0.151116 0.315500
v -0.198653 -0.141629 0.352105
v -0.203501 -0.137271 0.346914
v -0.195004 -0.128514 0.351037
v -0.201692 -0.128212 0.342210
v -0.205443 -0.146006 0.349222
v -0.207657 -0.141629 0.342210
v -0.205677 -0.132377 0.338179
v -0.203629 -0.123881 0.328602
v -0.203897 -0.123279 0.315500
v -0.211514 -0.141616 0.328602
v -0.212050 -0.141616 0.315500
v -0.206542 -0.130432 0.328602
v -0.206810 -0.129830 0.315500
v -0.218062 -0.173299 0.348909
v -0.219889 -0.168487 0.341813
v -0.218296 -0.159670 0.337517
v -0.223165 -0.167821 0.328602
v -0.223701 -0.167821 0.315500
v -0.218918 -0.158269 0.328602
v -0.219186 -0.157667 0.315500
v -0.245474 -0.222991 0.338850
v -0.246085 -0.219266 0.329206
v -0.247002 -0.220230 0.315500
v -0.243889 -0.213453 0.325240
v -0.243939 -0.213341 0.315500
v -0.192825 -0.118712 0.349517
v -0.195426 -0.114771 0.342607
v -0.193058 -0.105085 0.338841
v -0.199864 -0.115411 0.328602
v -0.200399 -0.115411 0.315500
v -0.193664 -0.101354 0.329188
v -0.194574 -0.102309 0.315500
v -0.191474 -0.095547 0.325211
v -0.191520 -0.095442 0.315500
v -0.197931 -0.287504 0.302398
v -0.197931 -0.287015 0.289295
v -0.211033 -0.287504 0.302398
v -0.211033 -0.287015 0.289295
v -0.197931 -0.283544 0.276193
v -0.197931 -0.279876 0.268617
v -0.211033 -0.283544 0.276193
v -0.211033 -0.279876 0.268617
v -0.224136 -0.287504 0.302398
v -0.224136 -0.287015 0.289295
v -0.237238 -0.287504 0.302398
v -0.237238 -0.287015 0.289295
v -0.224136 -0.283544 0.276193
v -0.224136 -0.279876 0.268617
v -0.237238 -0.283544 0.276193
v -0.237238 -0.279876 0.268617
v -0.197931 -0.272639 0.264128
v -0.197931 -0.259537 0.259972
v -0.211033 -0.272639 0.264128
v -0.211033 -0.259537 0.259972
v -0.197931 -0.246435 0.259278
v -0.197931 -0.233332 0.259278
v -0.211033 -0.246435 0.259278
v -0.211033 -0.233332 0.259278
v -0.224136 -0.272639 0.264128
v -0.224136 -0.259537 0.259980
v -0.237238 -0.272639 0.264128
v -0.237238 -0.259537 0.260734
v -0.224136 -0.246435 0.259559
v -0.224136 -0.233332 0.260089
v -0.237238 -0.246435 0.261957
v -0.243298 -0.227886 0.270314
v -0.238253 -0.232685 0.265387
v -0.250340 -0.287504 0.302398
v -0.250340 -0.287015 0.289295
v -0.263443 -0.287504 0.302398
v -0.263443 -0.287015 0.289295
v -0.250340 -0.283544 0.276193
v -0.250340 -0.279876 0.268617
v -0.263877 -0.282399 0.276081
v -0.259800 -0.279647 0.268958
v -0.271605 -0.283347 0.302398
v -0.271337 -0.283103 0.289295
v -0.270711 -0.281636 0.280373
v -0.268692 -0.269015 0.302398
v -0.268425 -0.269617 0.289295
v -0.264478 -0.259537 0.302398
v -0.263943 -0.259537 0.289295
v -0.250340 -0.272639 0.265646
v -0.255916 -0.255179 0.270976
v -0.251065 -0.259543 0.265796
v -0.266343 -0.272982 0.276081
v -0.259798 -0.272639 0.268403
v -0.260078 -0.259543 0.275683
v -0.257858 -0.263914 0.268674
v -0.256316 -0.241178 0.302398
v -0.256048 -0.241781 0.289295
v -0.252828 -0.233332 0.302398
v -0.252292 -0.233332 0.289295
v -0.259229 -0.247729 0.302398
v -0.258961 -0.248332 0.289295
v -0.254112 -0.246124 0.275683
v -0.247421 -0.246435 0.266857
v -0.247846 -0.232685 0.275286
v -0.245240 -0.236621 0.268378
v -0.258093 -0.250285 0.279711
v -0.271605 -0.275566 0.302398
v -0.271337 -0.276169 0.289295
v -0.270711 -0.277577 0.280373
v -0.197931 -0.220230 0.259278
v -0.197931 -0.207128 0.259278
v -0.211033 -0.220230 0.259485
v -0.211033 -0.207128 0.259957
v -0.197931 -0.194025 0.259419
v -0.197931 -0.180923 0.259825
v -0.211033 -0.194025 0.261091
v -0.211033 -0.180923 0.263128
v -0.243532 -0.214257 0.283924
v -0.241027 -0.206790 0.302398
v -0.241211 -0.208303 0.288693
v -0.224136 -0.220230 0.261445
v -0.230679 -0.200593 0.269652
v -0.225441 -0.205827 0.265104
v -0.241881 -0.219266 0.275286
v -0.235045 -0.220230 0.266420
v -0.235615 -0.205827 0.274889
v -0.232621 -0.209328 0.268083
v -0.228650 -0.178953 0.302398
v -0.228382 -0.179555 0.289295
v -0.235352 -0.194025 0.302398
v -0.234816 -0.194025 0.289295
v -0.231563 -0.185504 0.302398
v -0.231295 -0.186106 0.289295
v -0.229219 -0.194025 0.272144
v -0.222668 -0.194025 0.266132
v -0.226154 -0.181927 0.276879
v -0.219756 -0.180923 0.267762
v -0.232483 -0.194025 0.278696
v -0.230914 -0.186964 0.281703
v -0.216273 -0.151116 0.302398
v -0.216006 -0.151718 0.289295
v -0.197931 -0.167821 0.260738
v -0.197931 -0.154718 0.262539
v -0.216119 -0.164565 0.271647
v -0.211464 -0.168488 0.266213
v -0.213923 -0.155069 0.276086
v -0.207379 -0.154718 0.267306
v -0.203897 -0.123279 0.302398
v -0.203629 -0.123881 0.289295
v -0.212050 -0.141616 0.302398
v -0.211514 -0.141616 0.289295
v -0.206810 -0.129830 0.302398
v -0.206542 -0.130432 0.289295
v -0.203501 -0.137272 0.270984
v -0.198652 -0.141630 0.265795
v -0.201691 -0.128212 0.275688
v -0.195003 -0.128514 0.266863
v -0.207657 -0.141630 0.275688
v -0.205443 -0.146007 0.268677
v -0.205677 -0.132378 0.279719
v -0.223701 -0.167821 0.302398
v -0.223165 -0.167821 0.289295
v -0.219186 -0.157667 0.302398
v -0.218918 -0.158269 0.289295
v -0.219888 -0.168488 0.276086
v -0.218061 -0.173300 0.268990
v -0.218295 -0.159671 0.280381
v -0.247002 -0.220230 0.302398
v -0.246085 -0.219266 0.288693
v -0.243939 -0.213341 0.302398
v -0.243889 -0.213453 0.292658
v -0.245474 -0.222992 0.279049
v -0.200399 -0.115411 0.302398
v -0.199864 -0.115411 0.289295
v -0.194574 -0.102309 0.302398
v -0.193664 -0.101354 0.288710
v -0.195426 -0.114772 0.275291
v -0.192824 -0.118714 0.268382
v -0.193058 -0.105085 0.279057
v -0.191520 -0.095442 0.302398
v -0.191474 -0.095547 0.292688
vn 0.4758 -0.4756 0.7399
vn 0.0865 -0.6448 0.7594
vn 0.0587 -0.9419 0.3307
vn 0.6999 -0.5964 0.3930
vn 0.7418 -0.6489 0.1694
vn 0.0806 -0.9871 0.1383
vn 0.0899 -0.9958 0.0173
vn 0.7406 -0.6717 0.0187
vn 0.0303 -0.7101 0.7035
vn 0.0013 -0.7417 0.6707
vn 0.0000 -0.9377 0.3475
vn 0.0000 -0.9891 0.1476
vn 0.0000 -0.9998 0.0186
vn 0.3446 -0.0471 0.9376
vn 0.6886 0.2737 0.6715
vn 0.7698 0.3222 0.5510
vn 0.5224 0.1438 0.8405
vn 0.8826 0.1948 0.4280
vn 0.6007 0.0360 0.7986
vn 0.8822 0.3537 0.3109
vn 0.9754 0.1675 0.1436
vn 0.9868 0.1610 0.0167
vn 0.9195 0.3927 0.0187
vn 0.9225 0.3683 0.1153
vn 0.6436 0.2545 0.7218
vn 0.8448 0.3667 0.3897
vn 0.8530 0.3467 0.3901
vn 0.6911 0.2831 0.6650
vn 0.9027 0.4113 0.1260
vn 0.9195 0.3927 0.0186
vn 0.9185 0.3747 0.1267
vn 0.9103 0.4013 0.1016
vn 0.1162 -0.3134 0.9425
vn 0.2394 -0.0345 0.9703
vn 0.0706 -0.1324 0.9887
vn 0.0177 -0.4018 0.9156
vn 0.3551 0.1419 0.9240
vn 0.5322 0.2329 0.8140
vn 0.2445 0.1024 0.9642
vn 0.1538 0.0487 0.9869
vn 0.7551 0.3413 0.5598
vn 0.8850 0.3953 0.2458
vn 0.6056 0.2505 0.7553
vn 0.8289 0.3729 0.4170
vn 0.8438 0.3477 0.4088
vn 0.6646 0.2760 0.6944
vn 0.7367 0.3347 0.5875
vn 0.5010 0.2200 0.8370
vn 0.3312 0.1404 0.9330
vn 0.9021 0.4103 0.1333
vn 0.9142 0.3816 0.1362
vn 0.5793 0.2437 0.7778
vn 0.8206 0.3685 0.4369
vn 0.8373 0.3399 0.4282
vn 0.6437 0.2621 0.7190
vn 0.9026 0.4055 0.1443
vn 0.9121 0.3835 0.1452
vn 0.9072 0.3991 0.1331
vn 0.9095 0.3985 0.1185
vn 0.8767 0.3850 0.2885
vn 0.8828 0.3856 0.2682
vn 0.9224 0.3683 0.1162
vn 0.9102 0.4014 0.1024
vn 0.8819 0.3528 0.3127
vn 0.8846 0.3950 0.2479
vn 0.0000 -0.7430 0.6692
vn -0.0008 -0.7422 0.6701
vn 0.0015 -0.4167 0.9090
vn 0.0086 -0.1737 0.9848
vn 0.0000 -0.1791 0.9838
vn 0.0000 -0.4180 0.9084
vn 0.0267 -0.0125 0.9996
vn 0.0642 0.0328 0.9974
vn 0.0053 0.0039 1.0000
vn 0.0007 -0.0257 0.9997
vn -0.0081 -0.1782 0.9840
vn -0.0043 -0.4153 0.9097
vn 0.0000 -0.0264 0.9997
vn 0.0000 0.0000 1.0000
vn -0.0018 -0.0018 1.0000
vn -0.0063 -0.0292 0.9996
vn -0.0695 -0.7277 0.6824
vn -0.2575 -0.6826 0.6840
vn -0.3823 -0.8242 0.4178
vn -0.0575 -0.9411 0.3332
vn -0.0612 -0.9864 0.1525
vn -0.2780 -0.9494 0.1463
vn -0.2914 -0.9562 0.0269
vn -0.0527 -0.9984 0.0221
vn -0.7268 -0.6747 0.1284
vn -0.7345 -0.6782 0.0244
vn -0.7160 -0.6339 0.2924
vn -0.1059 -0.3780 0.9197
vn -0.1181 -0.1881 0.9750
vn -0.3372 -0.2102 0.9177
vn -0.4289 -0.3795 0.8198
vn -0.0817 -0.0590 0.9949
vn -0.0379 -0.0206 0.9991
vn -0.1972 -0.0831 0.9768
vn -0.2797 -0.1224 0.9522
vn -0.6469 -0.2665 0.7145
vn -0.8430 -0.3555 0.4037
vn -0.8237 -0.3900 0.4115
vn -0.6779 -0.2983 0.6719
vn -0.9042 -0.4022 0.1439
vn -0.9176 -0.3971 0.0164
vn -0.9191 -0.3935 0.0184
vn -0.9196 -0.3722 0.1259
vn -0.9183 -0.3935 0.0432
vn -0.9191 -0.3937 0.0143
vn -0.4808 -0.2115 0.8509
vn -0.7231 -0.3297 0.6069
vn -0.8117 -0.3522 0.4660
vn -0.5658 -0.2387 0.7892
vn -0.6517 -0.2674 0.7097
vn -0.8388 -0.3432 0.4227
vn -0.8843 -0.3481 0.3111
vn -0.9126 -0.3834 0.1420
vn -0.9193 -0.3931 0.0184
vn -0.9207 -0.3898 0.0163
vn -0.9188 -0.3722 0.1318
vn -0.6403 -0.4872 0.5938
vn -0.8859 -0.3955 0.2424
vn 0.1312 0.0614 0.9895
vn 0.2153 0.0895 0.9724
vn 0.0470 0.0244 0.9986
vn 0.0182 0.0091 0.9998
vn 0.3020 0.1323 0.9441
vn 0.4638 0.1999 0.8631
vn 0.1889 0.0806 0.9787
vn 0.1076 0.0559 0.9926
vn 0.0023 0.0023 1.0000
vn 0.0117 0.0071 0.9999
vn 0.0347 0.0189 0.9992
vn 0.0015 0.0015 1.0000
vn 0.5492 0.2282 0.8040
vn 0.7718 0.3352 0.5404
vn 0.8434 0.3671 0.3923
vn 0.6431 0.2567 0.7215
vn 0.3585 0.1530 0.9209
vn 0.2728 0.1099 0.9558
vn 0.5297 0.2326 0.8157
vn 0.7539 0.3414 0.5613
vn 0.8283 0.3727 0.4183
vn 0.6038 0.2502 0.7569
vn 0.8524 0.3473 0.3910
vn 0.6891 0.2832 0.6671
vn 0.8824 0.3856 0.2697
vn 0.9181 0.3753 0.1273
vn 0.9093 0.3986 0.1196
vn 0.9022 0.4099 0.1342
vn 0.0808 0.0414 0.9959
vn 0.1546 0.0709 0.9854
vn 0.0261 0.0136 0.9996
vn 0.0084 0.0054 1.0000
vn 0.2421 0.1017 0.9649
vn 0.3291 0.1398 0.9339
vn 0.1295 0.0608 0.9897
vn 0.0629 0.0322 0.9975
vn 0.9027 0.4114 0.1263
vn -0.0134 -0.0075 0.9999
vn -0.0031 -0.0028 1.0000
vn -0.0528 -0.0272 0.9982
vn -0.1154 -0.0571 0.9917
vn -0.0002 -0.0002 1.0000
vn -0.0064 -0.0044 1.0000
vn -0.0211 -0.0106 0.9997
vn -0.5113 -0.2255 0.8293
vn -0.7432 -0.3383 0.5773
vn -0.8232 -0.3706 0.4301
vn -0.5888 -0.2464 0.7698
vn -0.3125 -0.1347 0.9403
vn -0.2250 -0.0942 0.9698
vn -0.1394 -0.0646 0.9881
vn -0.0701 -0.0359 0.9969
vn -0.2564 -0.1064 0.9607
vn -0.3416 -0.1438 0.9288
vn 0.0007 0.0007 1.0000
vn -0.0010 -0.0010 1.0000
vn 0.0051 0.0038 1.0000
vn 0.0177 0.0089 0.9998
vn -0.0296 -0.0158 0.9994
vn -0.0097 -0.0061 0.9999
vn -0.0889 -0.0463 0.9950
vn -0.1676 -0.0762 0.9829
vn -0.0136 -0.0075 0.9999
vn -0.0382 -0.0208 0.9991
vn 0.7141 0.3121 0.6266
vn 0.9140 0.3819 0.1370
vn 0.9071 0.3990 0.1341
vn 0.4988 0.2190 0.8386
vn 0.7354 0.3341 0.5896
vn 0.8200 0.3682 0.4382
vn 0.5773 0.2432 0.7795
vn 0.2998 0.1317 0.9449
vn 0.2132 0.0887 0.9730
vn 0.4608 0.1982 0.8651
vn 0.7121 0.3087 0.6306
vn 0.7689 0.3331 0.5457
vn 0.5454 0.2260 0.8071
vn 0.8370 0.3387 0.4297
vn 0.6420 0.2611 0.7208
vn 0.8817 0.3519 0.3144
vn 0.9120 0.3835 0.1457
vn 0.9223 0.3683 0.1171
vn 0.8433 0.3473 0.4102
vn 0.6632 0.2750 0.6960
vn 0.8763 0.3849 0.2898
vn 0.9027 0.4052 0.1450
vn 0.6401 0.2558 0.7244
vn 0.8420 0.3676 0.3949
vn 0.8517 0.3479 0.3919
vn 0.6870 0.2834 0.6691
vn 0.9026 0.4115 0.1267
vn 0.9178 0.3759 0.1280
vn 0.9100 0.4015 0.1032
vn 0.9091 0.3987 0.1208
vn 0.8842 0.3946 0.2498
vn 0.8819 0.3856 0.2713
vn 0.0459 0.0240 0.9987
vn 0.1061 0.0555 0.9928
vn 0.0115 0.0070 0.9999
vn 0.1873 0.0801 0.9790
vn 0.2708 0.1082 0.9565
vn 0.0793 0.0406 0.9960
vn 0.0341 0.0185 0.9992
vn -0.0032 -0.0028 1.0000
vn 0.0014 0.0014 1.0000
vn 0.0082 0.0053 1.0000
vn 0.3557 0.1515 0.9222
vn 0.5271 0.2322 0.8175
vn 0.2396 0.1009 0.9656
vn 0.1524 0.0700 0.9858
vn 0.6019 0.2499 0.7584
vn 0.8278 0.3724 0.4197
vn 0.8428 0.3470 0.4115
vn 0.6619 0.2740 0.6977
vn 0.7340 0.3335 0.5916
vn 0.4967 0.2180 0.8401
vn 0.3270 0.1392 0.9347
vn 0.9022 0.4096 0.1350
vn 0.9138 0.3821 0.1377
vn 0.0255 0.0133 0.9996
vn 0.0617 0.0316 0.9976
vn 0.0048 0.0036 1.0000
vn 0.0006 0.0006 1.0000
vn 0.1277 0.0603 0.9900
vn 0.2112 0.0879 0.9735
vn 0.0449 0.0235 0.9987
vn 0.0171 0.0087 0.9998
vn 0.7527 0.3416 0.5628
vn -0.9152 -0.3806 0.1325
vn -0.9192 -0.3933 0.0186
vn -0.9076 -0.3997 0.1284
vn -0.5443 -0.2350 0.8053
vn -0.7605 -0.3409 0.5527
vn -0.8315 -0.3747 0.4101
vn -0.6143 -0.2525 0.7475
vn -0.6980 -0.2845 0.6572
vn -0.8549 -0.3461 0.3864
vn -0.8851 -0.3859 0.2602
vn -0.9197 -0.3720 0.1255
vn -0.9191 -0.3936 0.0183
vn -0.9103 -0.3983 0.1129
vn -0.9017 -0.4127 0.1291
vn -0.8461 -0.3501 0.4019
vn -0.6711 -0.2810 0.6860
vn -0.8784 -0.3859 0.2820
vn -0.5668 -0.2392 0.7884
vn -0.7884 -0.3862 0.4788
vn -0.8434 -0.3554 0.4029
vn -0.6542 -0.2582 0.7109
vn -0.3741 -0.1618 0.9131
vn -0.2839 -0.1198 0.9513
vn -0.1931 -0.0885 0.9772
vn -0.0980 -0.0658 0.9930
vn -0.1578 -0.1889 0.9692
vn -0.3860 -0.2910 0.8754
vn -0.8711 -0.4727 0.1333
vn -0.8642 -0.5031 0.0115
vn -0.9191 -0.3937 0.0138
vn -0.9183 -0.3935 0.0424
vn -0.2346 -0.5589 0.7954
vn -0.0577 -0.6829 0.7283
vn -0.1072 -0.9165 0.3855
vn -0.4902 -0.7327 0.4720
vn -0.0857 -0.3174 0.9444
vn -0.0119 -0.3776 0.9259
vn -0.5225 -0.8416 0.1365
vn -0.1025 -0.9856 0.1345
vn -0.0836 -0.9964 0.0167
vn -0.5168 -0.8560 0.0130
vn -0.9042 -0.4023 0.1434
vn -0.9175 -0.3973 0.0161
vn -0.8862 -0.3957 0.2412
vn -0.6065 -0.4671 0.6435
vn -0.8041 -0.4875 0.3401
vn 0.0000 -0.7163 0.6978
vn 0.0000 -0.9288 0.3706
vn 0.0000 -0.3888 0.9213
vn -0.0268 -0.0269 0.9993
vn -0.0028 -0.0032 1.0000
vn -0.0050 -0.0110 0.9999
vn -0.0453 -0.0830 0.9955
vn -0.0232 -0.1358 0.9905
vn -0.0024 -0.0184 0.9998
vn 0.0000 -0.0208 0.9998
vn -0.0015 -0.1549 0.9879
vn 0.0022 0.0022 1.0000
vn -0.0027 0.0027 1.0000
vn -0.0082 0.0029 1.0000
vn -0.0315 0.0219 0.9993
vn -0.0077 0.0130 0.9999
vn -0.0088 -0.0024 1.0000
vn -0.0035 -0.0029 1.0000
vn -0.0449 -0.0170 0.9988
vn -0.0518 -0.0005 0.9987
vn 0.0000 -0.1563 0.9877
vn -0.0075 0.0282 0.9996
vn -0.0628 0.0855 0.9944
vn -0.0527 0.1752 0.9831
vn -0.0024 0.0381 0.9993
vn -0.4789 -0.1081 0.8712
vn -0.5577 0.0154 0.8299
vn -0.4147 0.3841 0.8249
vn -0.2672 0.2632 0.9270
vn -0.1615 0.0588 0.9851
vn -0.2024 -0.0406 0.9785
vn 0.0000 0.0405 0.9992
vn -0.0123 0.2311 0.9729
vn 0.0000 0.2431 0.9700
vn -0.1402 0.6060 0.7830
vn -0.0489 0.7477 0.6622
vn 0.0000 0.5403 0.8415
vn -0.0425 0.5297 0.8471
vn -0.6456 0.2964 0.7038
vn -0.1568 0.9048 0.3960
vn -0.8524 0.5227 0.0146
vn -0.2329 0.9724 0.0172
vn -0.2198 0.9669 0.1296
vn -0.8390 0.5166 0.1709
vn -0.6143 -0.2066 0.7616
vn -0.9022 -0.4076 0.1407
vn 0.8990 -0.4179 0.1310
vn 0.9108 -0.4123 0.0186
vn 0.9108 -0.4124 0.0186
vn 0.9065 -0.3997 0.1356
vn 0.5977 -0.2622 0.7577
vn 0.8204 -0.3886 0.4195
vn 0.7447 -0.3561 0.5645
vn 0.5186 -0.2417 0.8201
vn 0.6722 -0.2976 0.6779
vn 0.8420 -0.3672 0.3951
vn 0.8731 -0.4040 0.2729
vn 0.9004 -0.4177 0.1217
vn 0.9090 -0.3964 0.1286
vn 0.8938 -0.4277 0.1347
vn 0.6588 -0.2897 0.6943
vn 0.8370 -0.3646 0.4080
vn 0.8692 -0.4035 0.2859
vn 0.3768 -0.6653 0.6446
vn 0.0802 -0.7255 0.6835
vn 0.0978 -0.9439 0.3154
vn 0.4972 -0.7982 0.3403
vn 0.5033 -0.8536 0.1346
vn 0.1425 -0.9808 0.1333
vn 0.1583 -0.9873 0.0169
vn 0.4910 -0.8710 0.0171
vn 0.0035 -0.7396 0.6731
vn 0.4870 -0.3759 0.7884
vn 0.7676 -0.4816 0.4228
vn 0.7272 -0.3545 0.5878
vn 0.4744 -0.2551 0.8425
vn 0.1661 -0.1859 0.9684
vn 0.1322 -0.3583 0.9242
vn 0.3236 -0.1503 0.9342
vn 0.2356 -0.1055 0.9661
vn 0.0617 -0.0330 0.9975
vn 0.1239 -0.0773 0.9893
vn 0.0141 -0.4102 0.9119
vn 0.0216 -0.1790 0.9836
vn 0.0154 -0.0329 0.9993
vn 0.0051 -0.0039 1.0000
vn 0.7955 -0.5895 0.1399
vn 0.7983 -0.6019 0.0191
vn 0.0523 -0.6850 0.7266
vn 0.2250 -0.5669 0.7924
vn 0.4705 -0.7499 0.4650
vn 0.1003 -0.9167 0.3867
vn 0.0101 -0.3791 0.9253
vn 0.0832 -0.3217 0.9432
vn 0.0989 -0.9858 0.1358
vn 0.4953 -0.8577 0.1380
vn 0.4952 -0.8686 0.0175
vn 0.0819 -0.9965 0.0167
vn 0.8296 -0.5405 0.1402
vn 0.8473 -0.5308 0.0186
vn 0.7747 -0.5465 0.3180
vn 0.0000 0.8062 0.5917
vn 0.0000 0.9513 0.3082
vn 0.0000 0.9998 0.0187
vn 0.0000 0.9930 0.1182
vn 0.0148 0.2286 0.9734
vn 0.0541 0.7519 0.6570
vn 0.1440 0.6124 0.7773
vn 0.0543 0.5120 0.8573
vn 0.0037 0.5357 0.8444
vn 0.1600 0.9055 0.3930
vn 0.6469 0.2912 0.7048
vn 0.2738 0.9616 0.0173
vn 0.8737 0.4863 0.0142
vn 0.8649 0.4676 0.1826
vn 0.2421 0.9599 0.1417
vn 0.0012 -0.1551 0.9879
vn 0.0024 -0.0184 0.9998
vn 0.0227 -0.1368 0.9903
vn 0.0033 0.0373 0.9993
vn 0.0586 0.1646 0.9846
vn 0.0626 0.0732 0.9954
vn 0.0083 0.0257 0.9996
vn 0.2670 0.2366 0.9342
vn 0.3961 0.3910 0.8308
vn 0.5411 0.0574 0.8390
vn 0.4477 -0.1168 0.8865
vn 0.1720 -0.0446 0.9841
vn 0.1504 0.0445 0.9876
vn 0.0069 0.0105 0.9999
vn 0.0256 0.0155 0.9996
vn 0.0055 0.0018 1.0000
vn 0.0018 0.0018 1.0000
vn 0.0380 -0.0031 0.9993
vn 0.0291 -0.0130 0.9995
vn 0.0018 -0.0018 1.0000
vn 0.0055 -0.0018 1.0000
vn 0.5880 -0.2352 0.7739
vn 0.9023 -0.4163 0.1122
vn 0.9110 -0.4121 0.0189
vn 0.9121 -0.3903 0.1254
vn 0.6460 -0.2683 0.7147
vn 0.8332 -0.3727 0.4084
vn 0.8020 -0.3646 0.4731
vn 0.5532 -0.2467 0.7957
vn 0.9097 -0.4124 0.0482
vn 0.9107 -0.4128 0.0177
vn 0.9116 -0.4106 0.0185
vn 0.9104 -0.3902 0.1377
vn 0.8956 -0.4199 0.1466
vn 0.9099 -0.4144 0.0186
vn 0.8763 -0.4110 0.2512
vn 0.6166 -0.2655 0.7412
vn 0.8272 -0.3898 0.4047
vn 0.7576 -0.3588 0.5453
vn 0.5428 -0.2482 0.8024
vn 0.2572 -0.1130 0.9597
vn 0.3457 -0.1534 0.9257
vn 0.3683 -0.1666 0.9147
vn 0.2764 -0.1205 0.9535
vn 0.0856 -0.0458 0.9953
vn 0.1651 -0.0790 0.9831
vn 0.6913 -0.3011 0.6569
vn 0.8471 -0.3655 0.3857
vn 0.8776 -0.4034 0.2589
vn 0.8935 -0.4307 0.1275
vn 0.8760 -0.3624 0.3182
vn 0.6353 -0.2735 0.7222
vn 0.8285 -0.3564 0.4320
vn 0.7874 -0.4166 0.4544
vn 0.5675 -0.2529 0.7835
vn 0.4631 -0.2162 0.8595
vn 0.7075 -0.3403 0.6194
vn 0.2938 -0.1356 0.9462
vn 0.9036 -0.4028 0.1461
vn 0.9107 -0.4126 0.0189
vn 0.8944 -0.4225 0.1466
vn 0.3875 -0.3027 0.8707
vn 0.1580 -0.1937 0.9682
vn 0.1001 -0.0687 0.9926
vn 0.1988 -0.0957 0.9754
vn 0.1874 -0.0848 0.9786
vn 0.1035 -0.0567 0.9930
vn 0.0116 -0.0071 0.9999
vn 0.0354 -0.0203 0.9992
vn 0.0425 -0.0239 0.9988
vn 0.0148 -0.0084 0.9999
vn 0.0023 -0.0023 1.0000
vn 0.6020 -0.4843 0.6349
vn 0.1455 -0.0711 0.9868
vn 0.0729 -0.0386 0.9966
vn 0.0073 -0.0049 1.0000
vn 0.0244 -0.0135 0.9996
vn 0.0299 -0.0169 0.9994
vn 0.0094 -0.0060 0.9999
vn 0.0012 -0.0012 1.0000
vn 0.0006 -0.0006 1.0000
vn -0.0013 0.0013 1.0000
vn -0.0007 0.0007 1.0000
vn -0.0257 0.0140 0.9996
vn -0.0079 0.0052 1.0000
vn 0.0017 -0.0017 1.0000
vn -0.0001 0.0001 1.0000
vn -0.0132 0.0077 0.9999
vn -0.0029 0.0027 1.0000
vn -0.0054 0.0040 1.0000
vn -0.0192 0.0100 0.9998
vn -0.1321 0.0640 0.9892
vn -0.0636 0.0335 0.9974
vn -0.0504 0.0269 0.9984
vn -0.1136 0.0581 0.9918
vn -0.3090 0.1376 0.9411
vn -0.2190 0.0951 0.9711
vn 0.0453 -0.0843 0.9954
vn 0.0050 -0.0111 0.9999
vn 0.0028 -0.0033 1.0000
vn 0.0273 -0.0277 0.9992
vn 0.0035 -0.0030 1.0000
vn 0.0002 -0.0002 1.0000
vn -0.0014 0.0014 1.0000
vn -0.0638 0.0336 0.9974
vn -0.0258 0.0140 0.9996
vn -0.0193 0.0101 0.9998
vn -0.0505 0.0270 0.9984
vn -0.2193 0.0953 0.9710
vn -0.1323 0.0641 0.9891
vn -0.0020 0.0020 1.0000
vn -0.0105 0.0065 0.9999
vn -0.0977 0.0548 0.9937
vn -0.0388 0.0219 0.9990
vn -0.0322 0.0180 0.9993
vn -0.0770 0.0403 0.9962
vn -0.2657 0.1087 0.9579
vn -0.1801 0.0808 0.9803
vn -0.5615 0.2477 0.7896
vn -0.8078 0.3662 0.4619
vn -0.7204 0.3391 0.6050
vn -0.4793 0.2181 0.8501
vn -0.1974 0.0865 0.9765
vn -0.2859 0.1317 0.9492
vn -0.5315 0.2282 0.8157
vn -0.7557 0.3381 0.5609
vn -0.7001 0.3083 0.6441
vn -0.4464 0.1982 0.8726
vn -0.8199 0.3563 0.4480
vn -0.6299 0.2647 0.7302
vn -0.8738 0.3641 0.3225
vn -0.9152 0.3846 0.1204
vn -0.9134 0.4067 0.0180
vn -0.9115 0.4111 0.0149
vn -0.8995 0.4126 0.1436
vn -0.8811 0.4085 0.2383
vn -0.1507 0.0720 0.9860
vn -0.2402 0.1057 0.9649
vn -0.5250 0.2403 0.8165
vn -0.3518 0.1550 0.9232
vn -0.6621 0.2865 0.6925
vn -0.8397 0.3597 0.4067
vn -0.8238 0.3840 0.4170
vn -0.6021 0.2593 0.7552
vn -0.7355 0.3460 0.5825
vn -0.5024 0.2292 0.8337
vn -0.3301 0.1457 0.9326
vn -0.9093 0.3937 0.1350
vn -0.9136 0.4062 0.0187
vn -0.8964 0.4226 0.1334
vn -0.6807 0.2937 0.6711
vn -0.8464 0.3606 0.3918
vn -0.8334 0.3803 0.4011
vn -0.6302 0.2638 0.7303
vn -0.9124 0.3890 0.1274
vn -0.8965 0.4244 0.1268
vn -0.9040 0.4144 0.1054
vn -0.7494 0.3524 0.5605
vn -0.9035 0.4116 0.1196
vn -0.8777 0.4056 0.2550
vn -0.8767 0.3982 0.2698
vn 0.7406 -0.6717 -0.0187
vn 0.0899 -0.9958 -0.0173
vn 0.0806 -0.9871 -0.1384
vn 0.7418 -0.6489 -0.1694
vn 0.6999 -0.5964 -0.3931
vn 0.0587 -0.9419 -0.3307
vn 0.0865 -0.6448 -0.7595
vn 0.4758 -0.4756 -0.7399
vn 0.0000 -0.9998 -0.0186
vn -0.0000 -0.9890 -0.1476
vn -0.0000 -0.9377 -0.3475
vn 0.0013 -0.7417 -0.6708
vn 0.0303 -0.7100 -0.7035
vn 0.9868 0.1610 -0.0167
vn 0.9754 0.1675 -0.1436
vn 0.9225 0.3683 -0.1153
vn 0.9195 0.3927 -0.0187
vn 0.6886 0.2736 -0.6715
vn 0.3446 -0.0470 -0.9376
vn 0.5224 0.1438 -0.8405
vn 0.7698 0.3222 -0.5510
vn 0.6007 0.0360 -0.7987
vn 0.8825 0.1948 -0.4280
vn 0.8822 0.3537 -0.3110
vn 0.9027 0.4113 -0.1260
vn 0.9184 0.3747 -0.1267
vn 0.9103 0.4013 -0.1016
vn 0.8448 0.3667 -0.3898
vn 0.6435 0.2545 -0.7219
vn 0.6911 0.2831 -0.6651
vn 0.8530 0.3467 -0.3902
vn 0.0177 -0.4018 -0.9156
vn 0.0706 -0.1324 -0.9887
vn 0.2394 -0.0345 -0.9703
vn 0.1161 -0.3133 -0.9425
vn 0.1538 0.0487 -0.9869
vn 0.2445 0.1024 -0.9642
vn 0.5321 0.2329 -0.8140
vn 0.3551 0.1419 -0.9240
vn 0.7551 0.3412 -0.5599
vn 0.8850 0.3953 -0.2459
vn 0.9021 0.4103 -0.1334
vn 0.9142 0.3816 -0.1363
vn 0.8289 0.3729 -0.4170
vn 0.6055 0.2505 -0.7554
vn 0.6645 0.2760 -0.6944
vn 0.8438 0.3477 -0.4088
vn 0.5010 0.2200 -0.8371
vn 0.7367 0.3347 -0.5876
vn 0.3312 0.1404 -0.9331
vn 0.9026 0.4055 -0.1443
vn 0.9121 0.3835 -0.1452
vn 0.9072 0.3991 -0.1332
vn 0.8206 0.3685 -0.4369
vn 0.5793 0.2436 -0.7779
vn 0.6436 0.2621 -0.7190
vn 0.8373 0.3399 -0.4283
vn 0.9095 0.3985 -0.1186
vn 0.8767 0.3850 -0.2886
vn 0.8828 0.3856 -0.2682
vn 0.9224 0.3683 -0.1162
vn 0.9102 0.4014 -0.1025
vn 0.8819 0.3528 -0.3127
vn 0.8846 0.3950 -0.2479
vn 0.0000 -0.7430 -0.6693
vn -0.0008 -0.7422 -0.6702
vn 0.0000 -0.4180 -0.9085
vn 0.0000 -0.1791 -0.9838
vn 0.0086 -0.1737 -0.9848
vn 0.0015 -0.4167 -0.9091
vn 0.0007 -0.0257 -0.9997
vn 0.0053 0.0039 -1.0000
vn 0.0641 0.0328 -0.9974
vn 0.0267 -0.0125 -0.9996
vn -0.0043 -0.4152 -0.9097
vn -0.0081 -0.1782 -0.9840
vn -0.0063 -0.0292 -0.9996
vn -0.0018 -0.0018 -1.0000
vn 0.0000 0.0000 -1.0000
vn 0.0000 -0.0264 -0.9997
vn -0.0527 -0.9984 -0.0222
vn -0.2914 -0.9562 -0.0269
vn -0.2780 -0.9494 -0.1463
vn -0.0612 -0.9864 -0.1526
vn -0.0575 -0.9411 -0.3332
vn -0.3823 -0.8242 -0.4178
vn -0.2574 -0.6825 -0.6840
vn -0.0695 -0.7276 -0.6824
vn -0.7345 -0.6782 -0.0244
vn -0.7268 -0.6747 -0.1284
vn -0.7160 -0.6339 -0.2924
vn -0.4289 -0.3794 -0.8198
vn -0.3371 -0.2102 -0.9177
vn -0.1181 -0.1881 -0.9750
vn -0.1059 -0.3780 -0.9197
vn -0.2797 -0.1224 -0.9523
vn -0.1972 -0.0830 -0.9768
vn -0.0379 -0.0206 -0.9991
vn -0.0817 -0.0590 -0.9949
vn -0.9176 -0.3971 -0.0165
vn -0.9041 -0.4022 -0.1439
vn -0.9196 -0.3722 -0.1259
vn -0.9191 -0.3935 -0.0184
vn -0.9191 -0.3937 -0.0143
vn -0.9183 -0.3935 -0.0433
vn -0.8430 -0.3555 -0.4038
vn -0.6469 -0.2665 -0.7145
vn -0.6779 -0.2983 -0.6720
vn -0.8237 -0.3900 -0.4116
vn -0.9193 -0.3931 -0.0184
vn -0.9126 -0.3834 -0.1421
vn -0.9187 -0.3722 -0.1319
vn -0.9207 -0.3898 -0.0163
vn -0.7231 -0.3297 -0.6070
vn -0.4808 -0.2115 -0.8510
vn -0.5658 -0.2387 -0.7893
vn -0.8116 -0.3522 -0.4660
vn -0.8387 -0.3432 -0.4227
vn -0.6517 -0.2674 -0.7098
vn -0.8843 -0.3481 -0.3111
vn -0.6403 -0.4872 -0.5939
vn -0.8859 -0.3955 -0.2424
vn 0.0182 0.0091 -0.9998
vn 0.0470 0.0244 -0.9986
vn 0.2153 0.0895 -0.9724
vn 0.1312 0.0613 -0.9895
vn 0.1075 0.0559 -0.9926
vn 0.1888 0.0806 -0.9787
vn 0.4638 0.1999 -0.8631
vn 0.3019 0.1322 -0.9441
vn 0.0023 0.0023 -1.0000
vn 0.0015 0.0015 -1.0000
vn 0.0347 0.0189 -0.9992
vn 0.0117 0.0071 -0.9999
vn 0.7717 0.3352 -0.5404
vn 0.5491 0.2282 -0.8040
vn 0.6430 0.2567 -0.7216
vn 0.8434 0.3671 -0.3923
vn 0.2727 0.1099 -0.9558
vn 0.3584 0.1530 -0.9209
vn 0.9181 0.3753 -0.1274
vn 0.9093 0.3986 -0.1197
vn 0.9022 0.4099 -0.1342
vn 0.7539 0.3414 -0.5613
vn 0.5296 0.2325 -0.8157
vn 0.6037 0.2502 -0.7569
vn 0.8283 0.3726 -0.4184
vn 0.6890 0.2832 -0.6671
vn 0.8523 0.3473 -0.3911
vn 0.8823 0.3856 -0.2698
vn 0.0084 0.0054 -1.0000
vn 0.0261 0.0136 -0.9996
vn 0.1546 0.0709 -0.9854
vn 0.0808 0.0414 -0.9959
vn 0.0629 0.0322 -0.9975
vn 0.1294 0.0608 -0.9897
vn 0.3290 0.1398 -0.9339
vn 0.2420 0.1017 -0.9649
vn 0.9027 0.4114 -0.1264
vn -0.1154 -0.0571 -0.9917
vn -0.0528 -0.0272 -0.9982
vn -0.0031 -0.0028 -1.0000
vn -0.0134 -0.0075 -0.9999
vn -0.0211 -0.0106 -0.9997
vn -0.0064 -0.0044 -1.0000
vn -0.0002 -0.0002 -1.0000
vn -0.7431 -0.3383 -0.5773
vn -0.5112 -0.2254 -0.8294
vn -0.5887 -0.2464 -0.7699
vn -0.8232 -0.3705 -0.4301
vn -0.2250 -0.0941 -0.9698
vn -0.3125 -0.1347 -0.9403
vn -0.3415 -0.1437 -0.9288
vn -0.2564 -0.1064 -0.9607
vn -0.0701 -0.0359 -0.9969
vn -0.1394 -0.0646 -0.9881
vn -0.0010 -0.0010 -1.0000
vn 0.0007 0.0007 -1.0000
vn 0.0177 0.0089 -0.9998
vn 0.0051 0.0038 -1.0000
vn -0.1676 -0.0762 -0.9829
vn -0.0889 -0.0462 -0.9950
vn -0.0097 -0.0061 -0.9999
vn -0.0296 -0.0158 -0.9994
vn -0.0382 -0.0208 -0.9991
vn -0.0136 -0.0075 -0.9999
vn 0.7141 0.3120 -0.6266
vn 0.9140 0.3818 -0.1370
vn 0.9071 0.3990 -0.1341
vn 0.7353 0.3341 -0.5896
vn 0.4988 0.2190 -0.8386
vn 0.5773 0.2432 -0.7795
vn 0.8200 0.3682 -0.4382
vn 0.2132 0.0887 -0.9730
vn 0.2998 0.1317 -0.9449
vn 0.9120 0.3835 -0.1458
vn 0.9223 0.3683 -0.1172
vn 0.7121 0.3087 -0.6306
vn 0.4608 0.1981 -0.8651
vn 0.5454 0.2260 -0.8071
vn 0.7689 0.3331 -0.5458
vn 0.6420 0.2611 -0.7209
vn 0.8370 0.3387 -0.4298
vn 0.8816 0.3519 -0.3145
vn 0.9027 0.4052 -0.1450
vn 0.6632 0.2750 -0.6961
vn 0.8433 0.3473 -0.4102
vn 0.8763 0.3849 -0.2898
vn 0.9026 0.4115 -0.1267
vn 0.9178 0.3759 -0.1280
vn 0.9100 0.4015 -0.1033
vn 0.8420 0.3676 -0.3949
vn 0.6401 0.2558 -0.7245
vn 0.6870 0.2834 -0.6691
vn 0.8517 0.3478 -0.3920
vn 0.9091 0.3987 -0.1208
vn 0.8842 0.3946 -0.2499
vn 0.8819 0.3856 -0.2714
vn 0.0115 0.0070 -0.9999
vn 0.1061 0.0555 -0.9928
vn 0.0459 0.0240 -0.9987
vn 0.0341 0.0185 -0.9992
vn 0.0793 0.0406 -0.9960
vn 0.2708 0.1082 -0.9565
vn 0.1872 0.0801 -0.9790
vn -0.0032 -0.0028 -1.0000
vn 0.0082 0.0053 -1.0000
vn 0.0014 0.0014 -1.0000
vn 0.1524 0.0700 -0.9858
vn 0.2396 0.1009 -0.9656
vn 0.5271 0.2322 -0.8175
vn 0.3557 0.1515 -0.9222
vn 0.9022 0.4096 -0.1350
vn 0.9138 0.3821 -0.1377
vn 0.8277 0.3724 -0.4198
vn 0.6019 0.2499 -0.7585
vn 0.6619 0.2740 -0.6978
vn 0.8427 0.3469 -0.4116
vn 0.4966 0.2179 -0.8401
vn 0.7340 0.3335 -0.5917
vn 0.3269 0.1392 -0.9347
vn 0.0006 0.0006 -1.0000
vn 0.0048 0.0036 -1.0000
vn 0.0617 0.0316 -0.9976
vn 0.0255 0.0132 -0.9996
vn 0.0171 0.0087 -0.9998
vn 0.0449 0.0235 -0.9987
vn 0.2112 0.0879 -0.9735
vn 0.1277 0.0603 -0.9900
vn 0.7527 0.3416 -0.5628
vn -0.9192 -0.3933 -0.0187
vn -0.9152 -0.3806 -0.1326
vn -0.9076 -0.3997 -0.1284
vn -0.9191 -0.3936 -0.0183
vn -0.9197 -0.3720 -0.1255
vn -0.9103 -0.3983 -0.1129
vn -0.9017 -0.4127 -0.1291
vn -0.7605 -0.3409 -0.5527
vn -0.5442 -0.2350 -0.8053
vn -0.6143 -0.2525 -0.7476
vn -0.8315 -0.3746 -0.4101
vn -0.8549 -0.3461 -0.3865
vn -0.6979 -0.2844 -0.6573
vn -0.8851 -0.3859 -0.2603
vn -0.6711 -0.2810 -0.6861
vn -0.8461 -0.3501 -0.4020
vn -0.8784 -0.3859 -0.2820
vn -0.7884 -0.3862 -0.4788
vn -0.5667 -0.2392 -0.7884
vn -0.6541 -0.2582 -0.7110
vn -0.8434 -0.3554 -0.4030
vn -0.2839 -0.1198 -0.9513
vn -0.3741 -0.1618 -0.9132
vn -0.3860 -0.2910 -0.8754
vn -0.1578 -0.1888 -0.9693
vn -0.0980 -0.0658 -0.9930
vn -0.1931 -0.0885 -0.9772
vn -0.8642 -0.5031 -0.0115
vn -0.8711 -0.4727 -0.1333
vn -0.9183 -0.3935 -0.0424
vn -0.9191 -0.3937 -0.0138
vn -0.5168 -0.8560 -0.0130
vn -0.0836 -0.9964 -0.0167
vn -0.1025 -0.9856 -0.1346
vn -0.5225 -0.8416 -0.1366
vn -0.4902 -0.7327 -0.4720
vn -0.1072 -0.9164 -0.3855
vn -0.0577 -0.6828 -0.7283
vn -0.2346 -0.5588 -0.7954
vn -0.0119 -0.3776 -0.9259
vn -0.0857 -0.3174 -0.9444
vn -0.9175 -0.3973 -0.0161
vn -0.9042 -0.4023 -0.1435
vn -0.8861 -0.3957 -0.2412
vn -0.6064 -0.4671 -0.6435
vn -0.8041 -0.4875 -0.3402
vn -0.0000 -0.9288 -0.3706
vn 0.0000 -0.7162 -0.6979
vn 0.0000 -0.3887 -0.9214
vn -0.0453 -0.0830 -0.9955
vn -0.0050 -0.0110 -0.9999
vn -0.0028 -0.0032 -1.0000
vn -0.0268 -0.0269 -0.9993
vn -0.0015 -0.1549 -0.9879
vn 0.0000 -0.0208 -0.9998
vn -0.0024 -0.0184 -0.9998
vn -0.0232 -0.1358 -0.9905
vn 0.0022 0.0022 -1.0000
vn -0.0077 0.0130 -0.9999
vn -0.0315 0.0219 -0.9993
vn -0.0082 0.0029 -1.0000
vn -0.0027 0.0027 -1.0000
vn -0.0518 -0.0005 -0.9987
vn -0.0449 -0.0170 -0.9988
vn -0.0035 -0.0029 -1.0000
vn -0.0088 -0.0024 -1.0000
vn -0.0000 -0.1563 -0.9877
vn -0.0024 0.0381 -0.9993
vn -0.0527 0.1752 -0.9831
vn -0.0628 0.0855 -0.9944
vn -0.0075 0.0282 -0.9996
vn -0.5577 0.0153 -0.8299
vn -0.4788 -0.1081 -0.8712
vn -0.2672 0.2632 -0.9270
vn -0.4147 0.3840 -0.8249
vn -0.2023 -0.0406 -0.9785
vn -0.1615 0.0588 -0.9851
vn 0.0000 0.0405 -0.9992
vn 0.0000 0.2431 -0.9700
vn -0.0123 0.2311 -0.9729
vn -0.8390 0.5166 -0.1710
vn -0.2198 0.9669 -0.1296
vn -0.2329 0.9724 -0.0172
vn -0.8524 0.5227 -0.0146
vn -0.0425 0.5296 -0.8472
vn 0.0000 0.5403 -0.8415
vn -0.0489 0.7477 -0.6623
vn -0.1402 0.6059 -0.7831
vn -0.1568 0.9047 -0.3961
vn -0.6456 0.2963 -0.7038
vn -0.6142 -0.2066 -0.7616
vn -0.9022 -0.4076 -0.1407
vn 0.9108 -0.4123 -0.0187
vn 0.8990 -0.4179 -0.1310
vn 0.9065 -0.3997 -0.1356
vn 0.9108 -0.4124 -0.0187
vn 0.9004 -0.4176 -0.1217
vn 0.9090 -0.3964 -0.1287
vn 0.8938 -0.4277 -0.1348
vn 0.8204 -0.3885 -0.4195
vn 0.5976 -0.2622 -0.7577
vn 0.5186 -0.2417 -0.8202
vn 0.7447 -0.3560 -0.5645
vn 0.8420 -0.3672 -0.3952
vn 0.6722 -0.2976 -0.6779
vn 0.8731 -0.4040 -0.2730
vn 0.8370 -0.3646 -0.4080
vn 0.6588 -0.2897 -0.6943
vn 0.8692 -0.4035 -0.2859
vn 0.4910 -0.8710 -0.0171
vn 0.1583 -0.9873 -0.0170
vn 0.1425 -0.9808 -0.1333
vn 0.5033 -0.8536 -0.1347
vn 0.4972 -0.7981 -0.3403
vn 0.0978 -0.9439 -0.3154
vn 0.0802 -0.7255 -0.6836
vn 0.3767 -0.6652 -0.6446
vn 0.0035 -0.7395 -0.6731
vn 0.7676 -0.4816 -0.4228
vn 0.4870 -0.3758 -0.7884
vn 0.4744 -0.2550 -0.8426
vn 0.7272 -0.3545 -0.5878
vn 0.1322 -0.3582 -0.9242
vn 0.1661 -0.1859 -0.9684
vn 0.1239 -0.0773 -0.9893
vn 0.0617 -0.0330 -0.9975
vn 0.2355 -0.1055 -0.9661
vn 0.3236 -0.1502 -0.9342
vn 0.0216 -0.1790 -0.9836
vn 0.0141 -0.4101 -0.9119
vn 0.0051 -0.0039 -1.0000
vn 0.0154 -0.0329 -0.9993
vn 0.7983 -0.6019 -0.0191
vn 0.7955 -0.5895 -0.1399
vn 0.0819 -0.9965 -0.0167
vn 0.4952 -0.8686 -0.0175
vn 0.4953 -0.8577 -0.1380
vn 0.0989 -0.9858 -0.1359
vn 0.1003 -0.9167 -0.3868
vn 0.4704 -0.7499 -0.4651
vn 0.2250 -0.5669 -0.7925
vn 0.0523 -0.6850 -0.7267
vn 0.0832 -0.3217 -0.9432
vn 0.0101 -0.3790 -0.9253
vn 0.8473 -0.5308 -0.0186
vn 0.8296 -0.5405 -0.1402
vn 0.7747 -0.5465 -0.3181
vn -0.0000 0.9930 -0.1182
vn -0.0000 0.9998 -0.0187
vn -0.0000 0.8061 -0.5917
vn 0.0000 0.9513 -0.3083
vn 0.0148 0.2286 -0.9734
vn 0.2421 0.9599 -0.1417
vn 0.8649 0.4676 -0.1826
vn 0.8737 0.4863 -0.0143
vn 0.2738 0.9616 -0.0173
vn 0.0037 0.5357 -0.8444
vn 0.0543 0.5119 -0.8573
vn 0.1441 0.6123 -0.7774
vn 0.0541 0.7519 -0.6571
vn 0.6469 0.2911 -0.7048
vn 0.1600 0.9055 -0.3930
vn 0.0227 -0.1368 -0.9903
vn 0.0024 -0.0184 -0.9998
vn 0.0012 -0.1551 -0.9879
vn 0.0083 0.0257 -0.9996
vn 0.0625 0.0732 -0.9954
vn 0.0586 0.1646 -0.9846
vn 0.0033 0.0373 -0.9993
vn 0.3962 0.3909 -0.8308
vn 0.2670 0.2366 -0.9342
vn 0.4477 -0.1168 -0.8865
vn 0.5411 0.0573 -0.8390
vn 0.1504 0.0445 -0.9876
vn 0.1720 -0.0446 -0.9841
vn 0.0018 0.0018 -1.0000
vn 0.0055 0.0018 -1.0000
vn 0.0256 0.0155 -0.9996
vn 0.0069 0.0105 -0.9999
vn 0.0055 -0.0018 -1.0000
vn 0.0018 -0.0018 -1.0000
vn 0.0291 -0.0130 -0.9995
vn 0.0380 -0.0031 -0.9993
vn 0.5880 -0.2352 -0.7739
vn 0.9023 -0.4163 -0.1122
vn 0.9121 -0.3903 -0.1254
vn 0.9110 -0.4121 -0.0190
vn 0.9107 -0.4128 -0.0177
vn 0.9097 -0.4124 -0.0483
vn 0.9104 -0.3902 -0.1377
vn 0.9116 -0.4106 -0.0185
vn 0.9099 -0.4144 -0.0186
vn 0.8956 -0.4199 -0.1467
vn 0.8763 -0.4110 -0.2513
vn 0.8332 -0.3727 -0.4084
vn 0.6459 -0.2683 -0.7147
vn 0.5532 -0.2467 -0.7957
vn 0.8020 -0.3646 -0.4732
vn 0.8272 -0.3898 -0.4047
vn 0.6165 -0.2655 -0.7412
vn 0.5428 -0.2482 -0.8024
vn 0.7576 -0.3588 -0.5453
vn 0.3457 -0.1534 -0.9257
vn 0.2572 -0.1130 -0.9597
vn 0.1650 -0.0789 -0.9831
vn 0.0856 -0.0458 -0.9953
vn 0.2764 -0.1204 -0.9535
vn 0.3682 -0.1666 -0.9147
vn 0.8935 -0.4307 -0.1275
vn 0.8471 -0.3655 -0.3857
vn 0.6913 -0.3011 -0.6569
vn 0.8776 -0.4034 -0.2590
vn 0.8760 -0.3624 -0.3183
vn 0.9107 -0.4126 -0.0190
vn 0.9035 -0.4028 -0.1461
vn 0.8944 -0.4225 -0.1467
vn 0.9108 -0.4124 -0.0186
vn 0.8284 -0.3564 -0.4320
vn 0.6352 -0.2735 -0.7223
vn 0.5675 -0.2529 -0.7836
vn 0.7874 -0.4166 -0.4544
vn 0.7075 -0.3403 -0.6194
vn 0.4631 -0.2162 -0.8596
vn 0.2938 -0.1356 -0.9462
vn 0.1988 -0.0957 -0.9754
vn 0.1001 -0.0687 -0.9926
vn 0.1580 -0.1937 -0.9682
vn 0.3875 -0.3027 -0.8708
vn 0.0354 -0.0203 -0.9992
vn 0.0116 -0.0071 -0.9999
vn 0.1035 -0.0567 -0.9930
vn 0.1874 -0.0848 -0.9786
vn 0.0022 -0.0022 -1.0000
vn 0.0148 -0.0084 -0.9999
vn 0.0425 -0.0239 -0.9988
vn 0.6020 -0.4843 -0.6349
vn 0.0244 -0.0135 -0.9996
vn 0.0073 -0.0049 -1.0000
vn 0.0729 -0.0386 -0.9966
vn 0.1455 -0.0711 -0.9868
vn 0.0012 -0.0012 -1.0000
vn 0.0094 -0.0060 -0.9999
vn 0.0299 -0.0169 -0.9994
vn -0.0013 0.0013 -1.0000
vn 0.0006 -0.0006 -1.0000
vn -0.0079 0.0052 -1.0000
vn -0.0257 0.0140 -0.9996
vn -0.0007 0.0007 -1.0000
vn -0.0001 0.0001 -1.0000
vn 0.0017 -0.0017 -1.0000
vn -0.0029 0.0027 -1.0000
vn -0.0132 0.0077 -0.9999
vn -0.0636 0.0335 -0.9974
vn -0.1321 0.0640 -0.9892
vn -0.0192 0.0100 -0.9998
vn -0.0054 0.0040 -1.0000
vn -0.2190 0.0951 -0.9711
vn -0.3089 0.1376 -0.9411
vn -0.1136 0.0581 -0.9918
vn -0.0504 0.0269 -0.9984
vn 0.0273 -0.0277 -0.9992
vn 0.0028 -0.0033 -1.0000
vn 0.0050 -0.0111 -0.9999
vn 0.0453 -0.0843 -0.9954
vn 0.0002 -0.0002 -1.0000
vn 0.0034 -0.0030 -1.0000
vn -0.0014 0.0014 -1.0000
vn -0.0258 0.0140 -0.9996
vn -0.0638 0.0336 -0.9974
vn -0.1323 0.0641 -0.9891
vn -0.2192 0.0953 -0.9710
vn -0.0505 0.0270 -0.9984
vn -0.0193 0.0101 -0.9998
vn -0.0388 0.0219 -0.9990
vn -0.0977 0.0548 -0.9937
vn -0.0105 0.0065 -0.9999
vn -0.0020 0.0020 -1.0000
vn -0.1800 0.0808 -0.9803
vn -0.2657 0.1087 -0.9579
vn -0.0770 0.0403 -0.9962
vn -0.0322 0.0180 -0.9993
vn -0.8078 0.3662 -0.4619
vn -0.5614 0.2477 -0.7896
vn -0.4793 0.2181 -0.8501
vn -0.7204 0.3391 -0.6050
vn -0.2859 0.1317 -0.9492
vn -0.1973 0.0864 -0.9765
vn -0.9134 0.4067 -0.0180
vn -0.9152 0.3846 -0.1204
vn -0.8995 0.4126 -0.1436
vn -0.9115 0.4111 -0.0149
vn -0.7556 0.3381 -0.5610
vn -0.5315 0.2282 -0.8158
vn -0.4463 0.1982 -0.8727
vn -0.7000 0.3082 -0.6442
vn -0.6299 0.2646 -0.7302
vn -0.8199 0.3563 -0.4481
vn -0.8737 0.3641 -0.3225
vn -0.8811 0.4085 -0.2384
vn -0.3517 0.1549 -0.9232
vn -0.5250 0.2403 -0.8165
vn -0.2402 0.1056 -0.9649
vn -0.1507 0.0720 -0.9860
vn -0.9136 0.4062 -0.0187
vn -0.9093 0.3937 -0.1350
vn -0.8964 0.4226 -0.1335
vn -0.8397 0.3597 -0.4068
vn -0.6621 0.2864 -0.6926
vn -0.6020 0.2593 -0.7552
vn -0.8238 0.3840 -0.4170
vn -0.5024 0.2292 -0.8337
vn -0.7355 0.3459 -0.5826
vn -0.3301 0.1456 -0.9327
vn -0.9124 0.3890 -0.1274
vn -0.8965 0.4244 -0.1268
vn -0.9040 0.4144 -0.1055
vn -0.8464 0.3606 -0.3919
vn -0.6806 0.2937 -0.6712
vn -0.6301 0.2637 -0.7303
vn -0.8333 0.3803 -0.4012
vn -0.7494 0.3524 -0.5606
vn -0.9035 0.4116 -0.1196
vn -0.8777 0.4056 -0.2551
vn -0.8767 0.3982 -0.2698
vn 0.5753 0.2427 0.7811
vn 0.8195 0.3679 0.4395
vn 0.8367 0.3376 0.4312
vn 0.6404 0.2601 0.7227
vn 0.9027 0.4049 0.1456
vn 0.9119 0.3835 0.1463
vn 0.9070 0.3990 0.1350
vn 0.9222 0.3683 0.1180
vn 0.9099 0.4016 0.1040
vn 0.2976 0.1312 0.9456
vn 0.4578 0.1964 0.8671
vn 0.1857 0.0795 0.9794
vn 0.1046 0.0552 0.9930
vn 0.5417 0.2238 0.8102
vn 0.7660 0.3309 0.5512
vn 0.8406 0.3680 0.3975
vn 0.6371 0.2550 0.7273
vn 0.3530 0.1500 0.9235
vn 0.2689 0.1065 0.9573
vn 0.7100 0.3053 0.6345
vn 0.8814 0.3509 0.3162
vn 0.8838 0.3943 0.2517
vn 0.9025 0.4115 0.1270
vn 0.8759 0.3848 0.2910
vn 0.5246 0.2318 0.8192
vn 0.7515 0.3418 0.5642
vn 0.8272 0.3722 0.4211
vn 0.6001 0.2496 0.7600
vn 0.8511 0.3484 0.3928
vn 0.6850 0.2835 0.6711
vn 0.8814 0.3856 0.2728
vn 0.9174 0.3765 0.1286
vn 0.9089 0.3988 0.1218
vn 0.9023 0.4092 0.1358
vn 0.9136 0.3824 0.1384
vn 0.9069 0.3989 0.1359
vn 0.8423 0.3466 0.4129
vn 0.6606 0.2730 0.6994
vn 0.8756 0.3846 0.2923
vn 0.0113 0.0068 0.9999
vn 0.0335 0.0181 0.9993
vn 0.0779 0.0398 0.9962
vn 0.1501 0.0691 0.9863
vn 0.0249 0.0129 0.9996
vn 0.0079 0.0052 1.0000
vn -0.0003 -0.0003 1.0000
vn -0.0075 -0.0049 1.0000
vn -0.0231 -0.0113 0.9997
vn 0.0005 0.0005 1.0000
vn -0.0013 -0.0013 1.0000
vn 0.2371 0.1001 0.9663
vn 0.3248 0.1386 0.9356
vn 0.1260 0.0597 0.9902
vn 0.0605 0.0310 0.9977
vn 0.4946 0.2169 0.8416
vn 0.7326 0.3329 0.5937
vn 0.8189 0.3676 0.4408
vn 0.5733 0.2422 0.7827
vn 0.2955 0.1306 0.9464
vn 0.2092 0.0871 0.9740
vn 0.0046 0.0035 1.0000
vn 0.0166 0.0085 0.9998
vn 0.0438 0.0231 0.9988
vn 0.1032 0.0549 0.9931
vn 0.0110 0.0067 0.9999
vn 0.0021 0.0021 1.0000
vn -0.1469 -0.0655 0.9870
vn -0.0765 -0.0383 0.9963
vn -0.2684 -0.1029 0.9578
vn -0.3507 -0.1446 0.9252
vn -0.0334 -0.0176 0.9993
vn -0.0115 -0.0069 0.9999
vn -0.1077 -0.0549 0.9927
vn -0.1874 -0.0775 0.9792
vn -0.5424 -0.2171 0.8116
vn -0.7685 -0.3211 0.5535
vn -0.8606 -0.2576 0.4393
vn -0.6177 -0.2011 0.7603
vn -0.8857 -0.3402 0.3159
vn -0.8880 -0.3844 0.2524
vn -0.9265 -0.3574 0.1175
vn -0.9241 -0.3816 0.0186
vn -0.9144 -0.3912 0.1042
vn -0.9632 -0.2334 0.1336
vn -0.9813 -0.1918 0.0146
vn -0.5830 -0.2377 0.7769
vn -0.8145 -0.3752 0.4425
vn -0.8414 -0.3283 0.4293
vn -0.6459 -0.2543 0.7198
vn -0.4617 -0.1915 0.8661
vn -0.7144 -0.2964 0.6339
vn -0.3035 -0.1296 0.9440
vn -0.9071 -0.3955 0.1438
vn -0.9164 -0.3728 0.1454
vn -0.0023 -0.0023 1.0000
vn -0.0194 -0.0092 0.9998
vn -0.0480 -0.0241 0.9986
vn -0.0009 -0.0009 1.0000
vn -0.0060 -0.0042 1.0000
vn -0.2190 -0.0878 0.9718
vn -0.1362 -0.0612 0.9888
vn -0.3116 -0.1571 0.9371
vn -0.4904 -0.2231 0.8424
vn -0.0687 -0.0344 0.9970
vn -0.0296 -0.0152 0.9994
vn -0.1096 -0.0725 0.9913
vn -0.2021 -0.1156 0.9725
vn -0.7103 -0.3523 0.6093
vn 0.4547 0.1946 0.8691
vn 0.7080 0.3018 0.6385
vn 0.7628 0.3288 0.5568
vn 0.5376 0.2220 0.8135
vn 0.8364 0.3364 0.4326
vn 0.6387 0.2590 0.7245
vn 0.8812 0.3499 0.3180
vn 0.9118 0.3835 0.1468
vn 0.9221 0.3683 0.1188
vn 0.6338 0.2547 0.7304
vn 0.8389 0.3686 0.4005
vn 0.8503 0.3486 0.3942
vn 0.6828 0.2832 0.6735
vn 0.9024 0.4116 0.1273
vn 0.9171 0.3771 0.1293
vn 0.9098 0.4016 0.1048
vn 0.1841 0.0790 0.9797
vn 0.2671 0.1053 0.9579
vn 0.0767 0.0391 0.9963
vn 0.0329 0.0178 0.9993
vn 0.3510 0.1491 0.9244
vn 0.5225 0.2308 0.8208
vn 0.2352 0.0992 0.9669
vn 0.1484 0.0684 0.9866
vn 0.7503 0.3413 0.5663
vn 0.8834 0.3940 0.2536
vn 0.5983 0.2490 0.7616
vn 0.8266 0.3718 0.4225
vn 0.8417 0.3462 0.4143
vn 0.6592 0.2721 0.7010
vn 0.7312 0.3323 0.5958
vn 0.4924 0.2159 0.8431
vn 0.3229 0.1379 0.9363
vn 0.9023 0.4089 0.1366
vn 0.9134 0.3826 0.1391
vn 0.5713 0.2418 0.7843
vn 0.8183 0.3673 0.4420
vn 0.8362 0.3353 0.4341
vn 0.6371 0.2580 0.7263
vn 0.9027 0.4043 0.1470
vn 0.9117 0.3835 0.1473
vn 0.9067 0.3989 0.1368
vn 0.9087 0.3989 0.1229
vn 0.8752 0.3845 0.2935
vn 0.8809 0.3856 0.2743
vn 0.0013 0.0013 1.0000
vn 0.0077 0.0051 1.0000
vn 0.0243 0.0125 0.9996
vn 0.0593 0.0304 0.9978
vn 0.0044 0.0034 1.0000
vn -0.0100 -0.0062 0.9999
vn -0.0019 -0.0019 1.0000
vn -0.0140 -0.0130 0.9998
vn -0.0446 -0.0338 0.9984
vn -0.0024 -0.0024 1.0000
vn 0.1243 0.0592 0.9905
vn 0.2071 0.0863 0.9745
vn 0.0427 0.0227 0.9988
vn 0.0160 0.0083 0.9998
vn 0.2933 0.1300 0.9471
vn 0.4517 0.1927 0.8711
vn 0.1825 0.0785 0.9801
vn 0.1017 0.0546 0.9933
vn 0.0108 0.0066 0.9999
vn 0.0323 0.0174 0.9993
vn 0.7059 0.2981 0.6425
vn 0.9027 0.4046 0.1463
vn 0.9220 0.3683 0.1196
vn 0.9097 0.4017 0.1054
vn 0.8809 0.3489 0.3198
vn 0.8830 0.3937 0.2554
vn 0.5334 0.2202 0.8167
vn 0.7595 0.3266 0.5626
vn 0.8371 0.3693 0.4035
vn 0.6304 0.2545 0.7334
vn 0.3476 0.1499 0.9256
vn 0.2654 0.1042 0.9585
vn 0.5079 0.2398 0.8274
vn 0.7490 0.3406 0.5683
vn 0.8038 0.4328 0.4081
vn 0.5366 0.3240 0.7792
vn 0.8496 0.3488 0.3956
vn 0.6807 0.2827 0.6758
vn 0.8805 0.3856 0.2758
vn 0.9168 0.3777 0.1299
vn 0.9085 0.3990 0.1240
vn 0.8526 0.5223 0.0186
vn 0.8445 0.5191 0.1318
vn 0.0755 0.0385 0.9964
vn 0.1433 0.0742 0.9869
vn 0.0213 0.0246 0.9995
vn 0.0075 0.0050 1.0000
vn 0.1955 0.1540 0.9685
vn 0.1713 0.3038 0.9372
vn 0.0260 0.3534 0.9351
vn 0.0327 0.1380 0.9899
vn 0.9023 0.4117 0.1276
vn 0.1544 0.9220 0.3551
vn 0.0007 0.9213 0.3888
vn 0.0092 0.6883 0.7254
vn 0.1289 0.6710 0.7302
vn 0.2118 0.9772 0.0171
vn 0.0000 0.9890 0.1476
vn 0.1983 0.9709 0.1343
vn 0.5834 0.7334 0.3490
vn 0.4563 0.5917 0.6646
vn 0.6077 0.7940 0.0170
vn 0.6115 0.7804 0.1303
vn 0.9026 -0.4124 0.1233
vn 0.9133 -0.4068 0.0187
vn 0.9110 -0.3916 0.1295
vn 0.5631 -0.2230 0.7957
vn 0.8307 -0.3068 0.4646
vn 0.7309 -0.3442 0.5893
vn 0.4954 -0.2261 0.8387
vn 0.6574 -0.2836 0.6981
vn 0.8379 -0.3589 0.4113
vn 0.8705 -0.3980 0.2895
vn 0.9011 -0.4125 0.1337
vn 0.9133 -0.4068 0.0186
vn 0.9083 -0.3952 0.1374
vn 0.9567 -0.2533 0.1430
vn 0.9786 -0.2053 0.0147
vn 0.5959 -0.2577 0.7606
vn 0.8216 -0.3834 0.4220
vn 0.7449 -0.3511 0.5673
vn 0.5174 -0.2374 0.8222
vn 0.2333 -0.1026 0.9670
vn 0.3234 -0.1433 0.9353
vn 0.6728 -0.2930 0.6793
vn 0.8436 -0.3622 0.3965
vn 0.8749 -0.3987 0.2750
vn 0.8963 -0.4220 0.1362
vn -0.2441 -0.4008 0.8831
vn -0.1281 -0.6017 0.7884
vn -0.4966 -0.6295 0.5975
vn -0.5746 -0.3161 0.7549
vn 0.6175 -0.2617 0.7418
vn 0.6439 -0.5418 0.5403
vn 0.3933 -0.5548 0.7331
vn 0.3801 -0.3234 0.8665
vn -0.3026 -0.9441 0.1310
vn 0.6770 -0.7259 0.1213
vn 0.7368 -0.6758 0.0201
vn -0.2736 -0.9616 0.0237
vn -0.0824 -0.2059 0.9751
vn -0.0595 -0.1411 0.9882
vn 0.1045 -0.1228 0.9869
vn 0.1912 -0.1770 0.9655
vn 0.3454 -0.1508 0.9262
vn 0.2580 -0.1114 0.9597
vn 0.0726 -0.0381 0.9966
vn 0.1445 -0.0695 0.9871
vn 0.1668 -0.0785 0.9829
vn 0.0872 -0.0463 0.9951
vn 0.0096 -0.0061 0.9999
vn 0.0301 -0.0167 0.9994
vn 0.3024 -0.1363 0.9434
vn 0.2128 -0.0925 0.9727
vn 0.0468 -0.0253 0.9986
vn 0.1089 -0.0574 0.9924
vn 0.1266 -0.0621 0.9900
vn 0.0596 -0.0316 0.9977
vn 0.0046 -0.0036 1.0000
vn 0.0174 -0.0091 0.9998
vn 0.0123 -0.0074 0.9999
vn 0.0024 -0.0024 1.0000
vn 0.0237 -0.0128 0.9996
vn 0.0071 -0.0048 1.0000
vn 0.0005 -0.0005 1.0000
vn -0.0258 0.0141 0.9996
vn -0.0080 0.0053 1.0000
vn -0.0055 0.0040 1.0000
vn -0.1326 0.0642 0.9891
vn -0.0639 0.0337 0.9974
vn -0.8983 -0.4391 0.0166
vn -0.8817 -0.4533 0.1306
vn -0.8385 -0.4504 0.3068
vn -0.0265 -0.0663 0.9974
vn -0.0102 -0.0277 0.9996
vn 0.0140 -0.0238 0.9996
vn 0.0429 -0.0575 0.9974
vn -0.0024 -0.0072 1.0000
vn 0.0024 -0.0072 1.0000
vn 0.0364 -0.0206 0.9991
vn 0.0121 -0.0073 0.9999
vn -0.0641 0.0338 0.9974
vn -0.0259 0.0141 0.9996
vn -0.0134 0.0077 0.9999
vn -0.0981 0.0549 0.9937
vn -0.0390 0.0220 0.9990
vn -0.0507 0.0271 0.9983
vn -0.1141 0.0582 0.9918
vn -0.3095 0.1377 0.9409
vn -0.2195 0.0954 0.9709
vn -0.5621 0.2479 0.7891
vn -0.8080 0.3665 0.4613
vn -0.7209 0.3393 0.6043
vn -0.4800 0.2183 0.8497
vn -0.1978 0.0866 0.9764
vn -0.2864 0.1320 0.9490
vn -0.0324 0.0181 0.9993
vn -0.0774 0.0406 0.9962
vn -0.2663 0.1092 0.9577
vn -0.1805 0.0810 0.9802
vn -0.1513 0.0723 0.9858
vn -0.2409 0.1059 0.9647
vn -0.5257 0.2404 0.8160
vn -0.3525 0.1554 0.9228
vn -0.5326 0.2288 0.8148
vn -0.7566 0.3388 0.5593
vn -0.7006 0.3093 0.6430
vn -0.4472 0.1988 0.8721
vn -0.8201 0.3566 0.4475
vn -0.6304 0.2651 0.7296
vn -0.8738 0.3644 0.3220
vn -0.9152 0.3846 0.1202
vn -0.9134 0.4068 0.0180
vn -0.9114 0.4112 0.0146
vn -0.8996 0.4126 0.1432
vn -0.6812 0.2937 0.6706
vn -0.8466 0.3605 0.3915
vn -0.8338 0.3801 0.4004
vn -0.6311 0.2640 0.7294
vn -0.9125 0.3888 0.1271
vn -0.8966 0.4244 0.1267
vn -0.9040 0.4143 0.1052
vn -0.7497 0.3524 0.5601
vn -0.8778 0.4057 0.2545
vn -0.8812 0.4086 0.2376
vn -0.0389 0.0219 0.9990
vn -0.0133 0.0077 0.9999
vn -0.0323 0.0181 0.9993
vn -0.1803 0.0809 0.9803
vn -0.0979 0.0549 0.9937
vn -0.1138 0.0581 0.9918
vn -0.1976 0.0865 0.9765
vn -0.4797 0.2182 0.8499
vn -0.3092 0.1376 0.9410
vn -0.6302 0.2649 0.7299
vn -0.8200 0.3564 0.4478
vn -0.8079 0.3663 0.4616
vn -0.5618 0.2478 0.7893
vn -0.7004 0.3088 0.6435
vn -0.4468 0.1985 0.8723
vn -0.2862 0.1319 0.9491
vn -0.7207 0.3392 0.6046
vn -0.8995 0.4126 0.1434
vn -0.8812 0.4085 0.2380
vn -0.0772 0.0404 0.9962
vn -0.1510 0.0721 0.9859
vn -0.3522 0.1552 0.9230
vn -0.2660 0.1089 0.9578
vn -0.6023 0.2593 0.7549
vn -0.8239 0.3841 0.4168
vn -0.7496 0.3524 0.5603
vn -0.5254 0.2404 0.8162
vn -0.2406 0.1058 0.9648
vn -0.3304 0.1458 0.9325
vn -0.6306 0.2639 0.7298
vn -0.8336 0.3802 0.4008
vn -0.7561 0.3385 0.5601
vn -0.5321 0.2285 0.8153
vn -0.8778 0.4057 0.2548
vn -0.8738 0.3642 0.3222
vn -0.9040 0.4143 0.1053
vn -0.9152 0.3846 0.1203
vn -0.9035 0.4115 0.1194
vn -0.9125 0.3889 0.1273
vn -0.8465 0.3606 0.3917
vn -0.6810 0.2937 0.6709
vn -0.8768 0.3982 0.2695
vn -0.8964 0.4227 0.1333
vn -0.6478 0.2758 0.7101
vn -0.8343 0.3544 0.4224
vn -0.8175 0.3805 0.4324
vn -0.5831 0.2529 0.7721
vn -0.9076 0.3952 0.1420
vn -0.9138 0.4057 0.0180
vn -0.8969 0.4190 0.1418
vn -0.9018 0.4120 0.1306
vn -0.9129 0.4063 0.0393
vn -0.9136 0.4065 0.0117
vn -0.9158 0.4014 0.0147
vn -0.9137 0.3851 0.1297
vn -0.8720 0.3978 0.2853
vn -0.8793 0.3621 0.3095
vn -0.9115 0.4111 0.0148
vn -0.5833 0.2530 0.7718
vn -0.8175 0.3806 0.4322
vn -0.7357 0.3460 0.5822
vn -0.5027 0.2294 0.8335
vn -0.8398 0.3598 0.4065
vn -0.6623 0.2866 0.6923
vn -0.8721 0.3978 0.2850
vn -0.9018 0.4120 0.1305
vn -0.9093 0.3937 0.1349
vn -0.8969 0.4190 0.1417
vn -0.9137 0.3851 0.1295
vn -0.9158 0.4014 0.0145
vn -0.9139 0.4056 0.0180
vn -0.9076 0.3951 0.1419
vn -0.6480 0.2759 0.7099
vn -0.8343 0.3545 0.4222
vn -0.8793 0.3623 0.3093
vn -0.9129 0.4063 0.0391
vn -0.9136 0.4065 0.0115
vn 0.0000 0.0157 0.9999
vn -0.0010 0.0165 0.9999
vn 0.0000 0.1354 0.9908
vn 0.0000 0.3635 0.9316
vn -0.0020 0.3626 0.9319
vn -0.0023 0.1359 0.9907
vn -0.0194 0.0102 0.9998
vn -0.0470 0.0350 0.9983
vn -0.2179 0.0976 0.9711
vn -0.1328 0.0643 0.9891
vn -0.0802 0.1522 0.9851
vn -0.0859 0.3477 0.9337
vn -0.3541 0.3697 0.8590
vn -0.2781 0.1815 0.9432
vn 0.0000 0.9217 0.3880
vn -0.0006 0.6944 0.7196
vn 0.0000 0.6950 0.7190
vn -0.0417 0.9169 0.3969
vn -0.3270 0.8202 0.4693
vn -0.2012 0.6484 0.7342
vn -0.0643 0.6828 0.7278
vn -0.2590 0.9657 0.0172
vn -0.2480 0.9541 0.1681
vn -0.0174 0.9863 0.1639
vn -0.6625 0.2867 0.6920
vn -0.8399 0.3598 0.4063
vn -0.8240 0.3841 0.4166
vn -0.6026 0.2594 0.7547
vn -0.7359 0.3461 0.5819
vn -0.5030 0.2295 0.8333
vn -0.3307 0.1458 0.9324
vn -0.9093 0.3937 0.1348
vn -0.8964 0.4228 0.1332
vn -0.6263 0.2874 0.7247
vn -0.8036 0.4019 0.4390
vn -0.8176 0.3806 0.4320
vn -0.5765 0.2609 0.7743
vn -0.9025 0.4077 0.1390
vn -0.9065 0.4218 0.0172
vn -0.8969 0.4191 0.1416
vn -0.9018 0.4120 0.1303
vn -0.9036 0.4115 0.1192
vn -0.8721 0.3978 0.2848
vn -0.8769 0.3982 0.2693
vn -0.5699 0.5105 0.6439
vn -0.7323 0.6808 0.0159
vn -0.7173 0.6810 0.1472
vn -0.6928 0.6407 0.3311
vn 0.9027 0.4049 -0.1457
vn 0.9119 0.3835 -0.1463
vn 0.9070 0.3990 -0.1350
vn 0.8194 0.3679 -0.4395
vn 0.5753 0.2427 -0.7811
vn 0.6403 0.2600 -0.7228
vn 0.8367 0.3376 -0.4312
vn 0.9222 0.3683 -0.1180
vn 0.9099 0.4016 -0.1040
vn 0.1046 0.0552 -0.9930
vn 0.1857 0.0795 -0.9794
vn 0.4577 0.1963 -0.8671
vn 0.2976 0.1311 -0.9456
vn 0.7660 0.3309 -0.5512
vn 0.5416 0.2238 -0.8103
vn 0.6371 0.2550 -0.7274
vn 0.8405 0.3680 -0.3975
vn 0.2689 0.1065 -0.9573
vn 0.3530 0.1500 -0.9235
vn 0.7100 0.3053 -0.6346
vn 0.9025 0.4115 -0.1270
vn 0.8838 0.3943 -0.2518
vn 0.8814 0.3509 -0.3163
vn 0.8759 0.3847 -0.2911
vn 0.9174 0.3765 -0.1287
vn 0.9089 0.3988 -0.1219
vn 0.9023 0.4092 -0.1359
vn 0.7515 0.3418 -0.5643
vn 0.5246 0.2318 -0.8192
vn 0.6001 0.2496 -0.7600
vn 0.8271 0.3721 -0.4211
vn 0.6849 0.2835 -0.6712
vn 0.8511 0.3484 -0.3928
vn 0.8814 0.3856 -0.2729
vn 0.9136 0.3824 -0.1384
vn 0.9068 0.3990 -0.1359
vn 0.6605 0.2730 -0.6994
vn 0.8422 0.3465 -0.4130
vn 0.8756 0.3846 -0.2923
vn 0.0335 0.0181 -0.9993
vn 0.0113 0.0069 -0.9999
vn 0.0079 0.0052 -1.0000
vn 0.0249 0.0129 -0.9996
vn 0.1501 0.0691 -0.9863
vn 0.0779 0.0397 -0.9962
vn -0.0231 -0.0113 -0.9997
vn -0.0075 -0.0049 -1.0000
vn -0.0003 -0.0003 -1.0000
vn -0.0013 -0.0013 -1.0000
vn 0.0005 0.0005 -1.0000
vn 0.0605 0.0310 -0.9977
vn 0.1260 0.0597 -0.9902
vn 0.3248 0.1386 -0.9356
vn 0.2371 0.1001 -0.9663
vn 0.7326 0.3329 -0.5937
vn 0.4945 0.2169 -0.8417
vn 0.5733 0.2422 -0.7827
vn 0.8189 0.3676 -0.4408
vn 0.2091 0.0871 -0.9740
vn 0.2954 0.1306 -0.9464
vn 0.0166 0.0085 -0.9998
vn 0.0046 0.0035 -1.0000
vn 0.0021 0.0021 -1.0000
vn 0.0110 0.0067 -0.9999
vn 0.1032 0.0549 -0.9931
vn 0.0438 0.0231 -0.9988
vn -0.3507 -0.1446 -0.9253
vn -0.2683 -0.1029 -0.9578
vn -0.0765 -0.0383 -0.9963
vn -0.1468 -0.0655 -0.9870
vn -0.1874 -0.0775 -0.9792
vn -0.1077 -0.0549 -0.9927
vn -0.0115 -0.0069 -0.9999
vn -0.0334 -0.0176 -0.9993
vn -0.9241 -0.3816 -0.0186
vn -0.9265 -0.3574 -0.1176
vn -0.9144 -0.3912 -0.1042
vn -0.9813 -0.1918 -0.0146
vn -0.9632 -0.2334 -0.1336
vn -0.7684 -0.3211 -0.5536
vn -0.5424 -0.2171 -0.8116
vn -0.6176 -0.2011 -0.7603
vn -0.8606 -0.2576 -0.4394
vn -0.8880 -0.3844 -0.2524
vn -0.8857 -0.3402 -0.3160
vn -0.9071 -0.3955 -0.1439
vn -0.9164 -0.3728 -0.1455
vn -0.8144 -0.3752 -0.4426
vn -0.5830 -0.2377 -0.7769
vn -0.6459 -0.2542 -0.7199
vn -0.8413 -0.3283 -0.4294
vn -0.7144 -0.2964 -0.6339
vn -0.4617 -0.1914 -0.8661
vn -0.3034 -0.1296 -0.9440
vn -0.0480 -0.0241 -0.9986
vn -0.0194 -0.0092 -0.9998
vn -0.0023 -0.0023 -1.0000
vn -0.0060 -0.0042 -1.0000
vn -0.0009 -0.0009 -1.0000
vn -0.4904 -0.2231 -0.8425
vn -0.3115 -0.1571 -0.9372
vn -0.1362 -0.0612 -0.9888
vn -0.2189 -0.0878 -0.9718
vn -0.2021 -0.1156 -0.9725
vn -0.1095 -0.0725 -0.9913
vn -0.0296 -0.0152 -0.9994
vn -0.0688 -0.0344 -0.9970
vn -0.7103 -0.3523 -0.6094
vn 0.9118 0.3835 -0.1468
vn 0.9221 0.3683 -0.1189
vn 0.7079 0.3018 -0.6386
vn 0.4547 0.1945 -0.8691
vn 0.5376 0.2220 -0.8135
vn 0.7628 0.3288 -0.5569
vn 0.6387 0.2590 -0.7246
vn 0.8364 0.3364 -0.4327
vn 0.8811 0.3499 -0.3180
vn 0.9024 0.4116 -0.1274
vn 0.9171 0.3771 -0.1293
vn 0.9098 0.4016 -0.1048
vn 0.8389 0.3686 -0.4005
vn 0.6338 0.2547 -0.7304
vn 0.6828 0.2831 -0.6735
vn 0.8503 0.3486 -0.3942
vn 0.0329 0.0178 -0.9993
vn 0.0767 0.0391 -0.9963
vn 0.2671 0.1053 -0.9579
vn 0.1841 0.0790 -0.9797
vn 0.1484 0.0684 -0.9866
vn 0.2351 0.0992 -0.9669
vn 0.5224 0.2308 -0.8209
vn 0.3509 0.1491 -0.9245
vn 0.7502 0.3413 -0.5663
vn 0.8834 0.3940 -0.2537
vn 0.9023 0.4089 -0.1367
vn 0.9134 0.3826 -0.1391
vn 0.8265 0.3718 -0.4226
vn 0.5983 0.2490 -0.7616
vn 0.6592 0.2720 -0.7010
vn 0.8417 0.3461 -0.4143
vn 0.4924 0.2159 -0.8432
vn 0.7312 0.3322 -0.5958
vn 0.3228 0.1379 -0.9364
vn 0.9027 0.4043 -0.1470
vn 0.9117 0.3835 -0.1474
vn 0.9067 0.3989 -0.1368
vn 0.8183 0.3673 -0.4421
vn 0.5713 0.2417 -0.7843
vn 0.6370 0.2579 -0.7264
vn 0.8361 0.3352 -0.4342
vn 0.9087 0.3989 -0.1230
vn 0.8752 0.3845 -0.2935
vn 0.8809 0.3856 -0.2744
vn 0.0077 0.0051 -1.0000
vn 0.0013 0.0013 -1.0000
vn 0.0044 0.0034 -1.0000
vn 0.0593 0.0304 -0.9978
vn 0.0243 0.0125 -0.9996
vn -0.0446 -0.0338 -0.9984
vn -0.0140 -0.0130 -0.9998
vn -0.0019 -0.0019 -1.0000
vn -0.0100 -0.0062 -0.9999
vn -0.0024 -0.0024 -1.0000
vn 0.0160 0.0083 -0.9998
vn 0.0427 0.0227 -0.9988
vn 0.2071 0.0863 -0.9745
vn 0.1243 0.0592 -0.9905
vn 0.1017 0.0546 -0.9933
vn 0.1825 0.0785 -0.9801
vn 0.4517 0.1927 -0.8711
vn 0.2933 0.1300 -0.9471
vn 0.0323 0.0174 -0.9993
vn 0.0108 0.0066 -0.9999
vn 0.7059 0.2981 -0.6425
vn 0.9027 0.4046 -0.1464
vn 0.9220 0.3683 -0.1197
vn 0.9097 0.4017 -0.1055
vn 0.8809 0.3489 -0.3198
vn 0.8830 0.3937 -0.2555
vn 0.7595 0.3266 -0.5626
vn 0.5334 0.2201 -0.8167
vn 0.6303 0.2544 -0.7335
vn 0.8371 0.3693 -0.4036
vn 0.2653 0.1042 -0.9585
vn 0.3476 0.1499 -0.9256
vn 0.9168 0.3777 -0.1299
vn 0.9085 0.3990 -0.1240
vn 0.8445 0.5191 -0.1319
vn 0.8526 0.5223 -0.0187
vn 0.7489 0.3406 -0.5684
vn 0.5078 0.2398 -0.8274
vn 0.5365 0.3240 -0.7792
vn 0.8038 0.4328 -0.4082
vn 0.6806 0.2827 -0.6759
vn 0.8496 0.3488 -0.3957
vn 0.8805 0.3856 -0.2759
vn 0.0075 0.0050 -1.0000
vn 0.0213 0.0246 -0.9995
vn 0.1433 0.0742 -0.9869
vn 0.0755 0.0385 -0.9964
vn 0.0327 0.1380 -0.9899
vn 0.0260 0.3534 -0.9351
vn 0.1713 0.3038 -0.9372
vn 0.1954 0.1540 -0.9686
vn 0.9023 0.4117 -0.1277
vn 0.1982 0.9709 -0.1344
vn -0.0000 0.9890 -0.1477
vn 0.2118 0.9772 -0.0171
vn 0.1288 0.6709 -0.7302
vn 0.0092 0.6883 -0.7254
vn 0.0007 0.9213 -0.3889
vn 0.1544 0.9220 -0.3552
vn 0.6115 0.7804 -0.1304
vn 0.6077 0.7940 -0.0170
vn 0.4563 0.5916 -0.6647
vn 0.5834 0.7333 -0.3491
vn 0.9133 -0.4068 -0.0186
vn 0.9026 -0.4124 -0.1233
vn 0.9110 -0.3916 -0.1296
vn 0.9133 -0.4068 -0.0187
vn 0.9011 -0.4125 -0.1337
vn 0.9083 -0.3952 -0.1375
vn 0.9786 -0.2053 -0.0147
vn 0.9567 -0.2534 -0.1431
vn 0.8307 -0.3068 -0.4646
vn 0.5631 -0.2230 -0.7957
vn 0.4954 -0.2260 -0.8388
vn 0.7309 -0.3442 -0.5894
vn 0.8378 -0.3589 -0.4114
vn 0.6574 -0.2836 -0.6982
vn 0.8705 -0.3980 -0.2896
vn 0.8215 -0.3834 -0.4221
vn 0.5958 -0.2577 -0.7606
vn 0.5173 -0.2373 -0.8222
vn 0.7449 -0.3511 -0.5674
vn 0.3234 -0.1433 -0.9354
vn 0.2332 -0.1026 -0.9670
vn 0.8963 -0.4220 -0.1362
vn 0.8436 -0.3621 -0.3966
vn 0.6728 -0.2930 -0.6794
vn 0.8749 -0.3987 -0.2751
vn -0.2736 -0.9616 -0.0237
vn 0.7368 -0.6758 -0.0201
vn 0.6770 -0.7259 -0.1213
vn -0.3026 -0.9441 -0.1310
vn -0.1281 -0.6016 -0.7884
vn -0.2441 -0.4007 -0.8831
vn -0.5746 -0.3161 -0.7550
vn -0.4966 -0.6295 -0.5976
vn 0.6439 -0.5417 -0.5403
vn 0.6175 -0.2616 -0.7418
vn 0.3801 -0.3234 -0.8666
vn 0.3933 -0.5548 -0.7332
vn 0.1911 -0.1770 -0.9655
vn 0.1045 -0.1228 -0.9869
vn -0.0595 -0.1411 -0.9882
vn -0.0824 -0.2059 -0.9751
vn 0.1445 -0.0695 -0.9871
vn 0.0726 -0.0381 -0.9966
vn 0.2580 -0.1114 -0.9597
vn 0.3454 -0.1508 -0.9263
vn 0.0301 -0.0167 -0.9994
vn 0.0096 -0.0061 -0.9999
vn 0.0872 -0.0463 -0.9951
vn 0.1668 -0.0785 -0.9829
vn 0.1089 -0.0574 -0.9924
vn 0.0468 -0.0253 -0.9986
vn 0.2127 -0.0925 -0.9727
vn 0.3024 -0.1362 -0.9434
vn 0.0174 -0.0091 -0.9998
vn 0.0047 -0.0036 -1.0000
vn 0.0596 -0.0316 -0.9977
vn 0.1266 -0.0621 -0.9900
vn 0.0024 -0.0024 -1.0000
vn 0.0123 -0.0074 -0.9999
vn 0.0005 -0.0005 -1.0000
vn 0.0071 -0.0048 -1.0000
vn 0.0237 -0.0128 -0.9996
vn -0.0080 0.0053 -1.0000
vn -0.0258 0.0141 -0.9996
vn -0.0639 0.0337 -0.9974
vn -0.1326 0.0642 -0.9891
vn -0.0055 0.0040 -1.0000
vn -0.8817 -0.4533 -0.1306
vn -0.8983 -0.4391 -0.0166
vn -0.8384 -0.4504 -0.3068
vn 0.0429 -0.0575 -0.9974
vn 0.0140 -0.0238 -0.9996
vn -0.0102 -0.0277 -0.9996
vn -0.0265 -0.0663 -0.9974
vn 0.0024 -0.0072 -1.0000
vn -0.0024 -0.0072 -1.0000
vn 0.0121 -0.0073 -0.9999
vn 0.0364 -0.0206 -0.9991
vn -0.0259 0.0141 -0.9996
vn -0.0641 0.0338 -0.9974
vn -0.0134 0.0077 -0.9999
vn -0.0390 0.0220 -0.9990
vn -0.0981 0.0549 -0.9937
vn -0.2195 0.0954 -0.9709
vn -0.3095 0.1377 -0.9409
vn -0.1141 0.0582 -0.9918
vn -0.0507 0.0271 -0.9983
vn -0.8080 0.3665 -0.4614
vn -0.5620 0.2478 -0.7891
vn -0.4800 0.2183 -0.8497
vn -0.7209 0.3392 -0.6044
vn -0.2864 0.1320 -0.9490
vn -0.1978 0.0866 -0.9764
vn -0.1805 0.0810 -0.9802
vn -0.2662 0.1092 -0.9577
vn -0.0774 0.0406 -0.9962
vn -0.0324 0.0181 -0.9993
vn -0.3525 0.1554 -0.9228
vn -0.5257 0.2404 -0.8160
vn -0.2409 0.1059 -0.9648
vn -0.1513 0.0723 -0.9858
vn -0.9134 0.4068 -0.0180
vn -0.9152 0.3846 -0.1202
vn -0.8996 0.4126 -0.1433
vn -0.9114 0.4112 -0.0147
vn -0.7565 0.3388 -0.5594
vn -0.5326 0.2288 -0.8149
vn -0.4471 0.1988 -0.8721
vn -0.7006 0.3093 -0.6430
vn -0.6303 0.2650 -0.7297
vn -0.8201 0.3566 -0.4475
vn -0.8738 0.3643 -0.3220
vn -0.9125 0.3888 -0.1272
vn -0.8966 0.4244 -0.1267
vn -0.9040 0.4143 -0.1053
vn -0.8466 0.3605 -0.3916
vn -0.6812 0.2937 -0.6706
vn -0.6310 0.2640 -0.7295
vn -0.8338 0.3801 -0.4004
vn -0.7497 0.3524 -0.5601
vn -0.8778 0.4057 -0.2545
vn -0.8812 0.4086 -0.2376
vn -0.0133 0.0077 -0.9999
vn -0.0389 0.0219 -0.9990
vn -0.0979 0.0549 -0.9937
vn -0.1802 0.0809 -0.9803
vn -0.0323 0.0181 -0.9993
vn -0.3092 0.1376 -0.9410
vn -0.4796 0.2182 -0.8499
vn -0.1976 0.0865 -0.9765
vn -0.1138 0.0581 -0.9918
vn -0.8200 0.3564 -0.4478
vn -0.6301 0.2648 -0.7300
vn -0.5617 0.2477 -0.7894
vn -0.8079 0.3663 -0.4617
vn -0.4467 0.1985 -0.8724
vn -0.7003 0.3088 -0.6436
vn -0.2861 0.1318 -0.9491
vn -0.7206 0.3392 -0.6047
vn -0.8995 0.4126 -0.1435
vn -0.8812 0.4086 -0.2380
vn -0.2660 0.1089 -0.9578
vn -0.3521 0.1551 -0.9230
vn -0.1510 0.0721 -0.9859
vn -0.0772 0.0404 -0.9962
vn -0.8239 0.3841 -0.4168
vn -0.6023 0.2593 -0.7550
vn -0.5253 0.2403 -0.8163
vn -0.7495 0.3524 -0.5604
vn -0.3303 0.1457 -0.9325
vn -0.2406 0.1058 -0.9649
vn -0.9040 0.4143 -0.1054
vn -0.9152 0.3846 -0.1203
vn -0.8336 0.3802 -0.4008
vn -0.6306 0.2638 -0.7299
vn -0.5320 0.2285 -0.8153
vn -0.7561 0.3385 -0.5602
vn -0.8738 0.3642 -0.3223
vn -0.8778 0.4057 -0.2548
vn -0.9035 0.4115 -0.1194
vn -0.9125 0.3889 -0.1273
vn -0.8964 0.4227 -0.1333
vn -0.6809 0.2937 -0.6709
vn -0.8465 0.3606 -0.3917
vn -0.8768 0.3982 -0.2696
vn -0.9138 0.4057 -0.0180
vn -0.9076 0.3952 -0.1420
vn -0.8969 0.4190 -0.1418
vn -0.9018 0.4120 -0.1307
vn -0.8342 0.3544 -0.4225
vn -0.6477 0.2757 -0.7102
vn -0.5830 0.2529 -0.7721
vn -0.8174 0.3805 -0.4325
vn -0.9136 0.4065 -0.0117
vn -0.9129 0.4063 -0.0394
vn -0.9137 0.3851 -0.1297
vn -0.9158 0.4014 -0.0147
vn -0.8720 0.3978 -0.2853
vn -0.8792 0.3621 -0.3095
vn -0.9114 0.4111 -0.0148
vn -0.9018 0.4120 -0.1305
vn -0.9093 0.3937 -0.1349
vn -0.8969 0.4190 -0.1417
vn -0.8175 0.3806 -0.4322
vn -0.5833 0.2530 -0.7719
vn -0.5027 0.2293 -0.8335
vn -0.7357 0.3460 -0.5823
vn -0.6623 0.2865 -0.6923
vn -0.8398 0.3598 -0.4066
vn -0.8721 0.3978 -0.2851
vn -0.9158 0.4014 -0.0145
vn -0.9137 0.3851 -0.1295
vn -0.9076 0.3951 -0.1419
vn -0.9139 0.4056 -0.0180
vn -0.8343 0.3544 -0.4222
vn -0.6480 0.2759 -0.7100
vn -0.8793 0.3623 -0.3093
vn -0.9136 0.4065 -0.0115
vn -0.9129 0.4063 -0.0391
vn -0.0010 0.0165 -0.9999
vn -0.0000 0.0157 -0.9999
vn -0.0023 0.1359 -0.9907
vn -0.0020 0.3626 -0.9320
vn 0.0000 0.3635 -0.9316
vn 0.0000 0.1354 -0.9908
vn -0.1328 0.0643 -0.9891
vn -0.2178 0.0975 -0.9711
vn -0.0470 0.0350 -0.9983
vn -0.0194 0.0102 -0.9998
vn -0.2781 0.1815 -0.9433
vn -0.3541 0.3697 -0.8591
vn -0.0859 0.3476 -0.9337
vn -0.0802 0.1522 -0.9851
vn -0.0000 0.6949 -0.7191
vn -0.0006 0.6944 -0.7196
vn -0.0000 0.9216 -0.3880
vn -0.0173 0.9863 -0.1640
vn -0.2479 0.9541 -0.1682
vn -0.2590 0.9657 -0.0172
vn -0.0643 0.6828 -0.7278
vn -0.2012 0.6484 -0.7343
vn -0.3270 0.8202 -0.4694
vn -0.0417 0.9169 -0.3969
vn -0.9093 0.3936 -0.1348
vn -0.8964 0.4228 -0.1332
vn -0.8399 0.3598 -0.4064
vn -0.6624 0.2867 -0.6921
vn -0.6025 0.2594 -0.7548
vn -0.8240 0.3841 -0.4166
vn -0.5030 0.2295 -0.8333
vn -0.7359 0.3461 -0.5820
vn -0.3306 0.1458 -0.9324
vn -0.9065 0.4218 -0.0173
vn -0.9025 0.4077 -0.1390
vn -0.8969 0.4191 -0.1416
vn -0.9018 0.4120 -0.1304
vn -0.8036 0.4018 -0.4391
vn -0.6262 0.2874 -0.7247
vn -0.5765 0.2608 -0.7744
vn -0.8176 0.3806 -0.4320
vn -0.9036 0.4115 -0.1193
vn -0.8721 0.3978 -0.2849
vn -0.8769 0.3982 -0.2693
vn -0.5699 0.5105 -0.6439
vn -0.7173 0.6810 -0.1473
vn -0.7323 0.6808 -0.0159
vn -0.6927 0.6407 -0.3311
vn -0.0135 -0.7297 0.6836
vn -0.0029 -0.1765 0.9843
vn -0.0001 -0.4179 0.9085
vn -0.0387 0.0218 0.9990
vn -0.0132 -0.0188 0.9997
vn -0.0070 -0.4118 0.9112
vn -0.0401 -0.1490 0.9880
vn -0.1927 -0.0617 0.9793
vn -0.0811 -0.3511 0.9328
vn -0.1103 0.0348 0.9933
vn -0.1971 0.0864 0.9766
vn -0.4790 0.2180 0.8503
vn -0.3029 0.1242 0.9449
vn -0.0730 -0.6783 0.7311
vn -0.4033 -0.5325 0.7441
vn -0.4367 -0.7027 0.5617
vn -0.0245 -0.9364 0.3500
vn -0.0100 -0.9875 0.1570
vn -0.2133 -0.9647 0.1544
vn -0.2314 -0.9727 0.0171
vn -0.8281 -0.5495 0.1112
vn -0.8514 -0.5244 0.0146
vn -0.7650 -0.4686 0.4418
vn -0.6206 0.2142 0.7543
vn -0.8390 0.3543 0.4130
vn -0.8383 0.1906 0.5108
vn -0.5720 -0.0065 0.8202
vn -0.7351 0.3457 0.5832
vn -0.4708 0.1325 0.8723
vn -0.1989 -0.2031 0.9587
vn -0.9092 0.3938 0.1352
vn -0.8964 0.4225 0.1337
vn -0.6473 0.2755 0.7107
vn -0.8341 0.3542 0.4229
vn -0.8173 0.3804 0.4328
vn -0.5802 0.2491 0.7754
vn -0.9075 0.3953 0.1422
vn -0.9138 0.4057 0.0181
vn -0.8969 0.4189 0.1420
vn -0.9017 0.4120 0.1309
vn -0.9775 0.2102 0.0148
vn -0.9678 0.2356 0.0889
vn -0.8719 0.3977 0.2857
vn -0.8897 0.1417 0.4341
vn -0.7202 0.3390 0.6053
vn -0.0104 0.0065 0.9999
vn -0.0321 0.0180 0.9993
vn -0.1799 0.0807 0.9804
vn -0.0976 0.0547 0.9937
vn -0.0768 0.0402 0.9962
vn -0.1504 0.0719 0.9860
vn -0.3514 0.1548 0.9233
vn -0.2655 0.1085 0.9580
vn -0.6297 0.2644 0.7305
vn -0.8199 0.3562 0.4483
vn -0.8077 0.3661 0.4621
vn -0.5611 0.2476 0.7898
vn -0.6998 0.3077 0.6447
vn -0.4459 0.1979 0.8729
vn -0.2857 0.1316 0.9492
vn -0.6298 0.2636 0.7307
vn -0.8331 0.3803 0.4015
vn -0.7552 0.3378 0.5617
vn -0.5310 0.2278 0.8162
vn -0.8777 0.4056 0.2553
vn -0.8737 0.3639 0.3228
vn -0.9040 0.4144 0.1055
vn -0.9134 0.4067 0.0181
vn -0.9152 0.3846 0.1205
vn -0.9115 0.4110 0.0150
vn -0.8995 0.4125 0.1438
vn -0.8810 0.4084 0.2387
vn -0.6018 0.2593 0.7554
vn -0.8237 0.3840 0.4172
vn -0.7492 0.3524 0.5608
vn -0.5246 0.2403 0.8167
vn -0.2399 0.1055 0.9650
vn -0.3298 0.1456 0.9328
vn -0.5828 0.2528 0.7723
vn -0.8174 0.3805 0.4326
vn -0.7353 0.3458 0.5828
vn -0.5021 0.2291 0.8339
vn -0.8397 0.3597 0.4069
vn -0.6619 0.2863 0.6927
vn -0.8720 0.3977 0.2855
vn -0.9017 0.4120 0.1308
vn -0.9092 0.3938 0.1351
vn -0.8969 0.4189 0.1419
vn -0.9035 0.4116 0.1197
vn -0.9124 0.3891 0.1275
vn -0.8463 0.3607 0.3920
vn -0.6804 0.2937 0.6714
vn -0.8767 0.3982 0.2700
vn -0.8964 0.4226 0.1336
vn -0.9129 0.4063 0.0399
vn -0.9136 0.4065 0.0120
vn -0.9157 0.4016 0.0149
vn -0.9137 0.3850 0.1301
vn -0.8792 0.3619 0.3099
vn -0.9137 0.3851 0.1299
vn -0.9157 0.4015 0.0148
vn -0.9075 0.3952 0.1421
vn -0.9129 0.4063 0.0396
vn -0.9136 0.4065 0.0119
vn -0.8792 0.3620 0.3097
vn -0.8342 0.3543 0.4226
vn -0.6476 0.2756 0.7104
vn -0.0135 -0.7297 -0.6837
vn -0.0001 -0.4179 -0.9085
vn -0.0029 -0.1765 -0.9843
vn -0.0132 -0.0188 -0.9997
vn -0.0387 0.0218 -0.9990
vn -0.0811 -0.3510 -0.9329
vn -0.1927 -0.0617 -0.9793
vn -0.0401 -0.1490 -0.9880
vn -0.0070 -0.4118 -0.9113
vn -0.3028 0.1242 -0.9449
vn -0.4789 0.2180 -0.8504
vn -0.1971 0.0864 -0.9766
vn -0.1103 0.0348 -0.9933
vn -0.2314 -0.9727 -0.0172
vn -0.2133 -0.9647 -0.1544
vn -0.0100 -0.9875 -0.1571
vn -0.0245 -0.9364 -0.3501
vn -0.4367 -0.7027 -0.5618
vn -0.4033 -0.5325 -0.7442
vn -0.0730 -0.6783 -0.7312
vn -0.8514 -0.5244 -0.0146
vn -0.8281 -0.5495 -0.1112
vn -0.7650 -0.4686 -0.4418
vn -0.9092 0.3938 -0.1353
vn -0.8964 0.4226 -0.1337
vn -0.8390 0.3543 -0.4131
vn -0.6205 0.2141 -0.7544
vn -0.5720 -0.0065 -0.8202
vn -0.8383 0.1906 -0.5109
vn -0.4707 0.1325 -0.8723
vn -0.7350 0.3457 -0.5833
vn -0.1989 -0.2031 -0.9587
vn -0.9138 0.4057 -0.0181
vn -0.9075 0.3953 -0.1422
vn -0.8969 0.4189 -0.1421
vn -0.9017 0.4120 -0.1310
vn -0.8341 0.3542 -0.4229
vn -0.6473 0.2755 -0.7107
vn -0.5801 0.2491 -0.7755
vn -0.8172 0.3804 -0.4329
vn -0.9678 0.2356 -0.0889
vn -0.9775 0.2103 -0.0149
vn -0.8719 0.3977 -0.2857
vn -0.8896 0.1417 -0.4341
vn -0.7201 0.3390 -0.6054
vn -0.0976 0.0547 -0.9937
vn -0.1798 0.0807 -0.9804
vn -0.0321 0.0180 -0.9993
vn -0.0104 0.0065 -0.9999
vn -0.2654 0.1085 -0.9580
vn -0.3514 0.1547 -0.9234
vn -0.1504 0.0719 -0.9860
vn -0.0768 0.0402 -0.9962
vn -0.8198 0.3561 -0.4484
vn -0.6296 0.2644 -0.7305
vn -0.5611 0.2476 -0.7899
vn -0.8077 0.3661 -0.4622
vn -0.4459 0.1979 -0.8729
vn -0.6997 0.3077 -0.6447
vn -0.2856 0.1316 -0.9493
vn -0.9040 0.4144 -0.1056
vn -0.9152 0.3846 -0.1206
vn -0.9134 0.4067 -0.0181
vn -0.8965 0.4244 -0.1269
vn -0.8331 0.3803 -0.4016
vn -0.6297 0.2636 -0.7307
vn -0.5309 0.2278 -0.8162
vn -0.7552 0.3378 -0.5618
vn -0.8737 0.3639 -0.3228
vn -0.8777 0.4056 -0.2554
vn -0.8995 0.4125 -0.1438
vn -0.9115 0.4110 -0.0150
vn -0.8810 0.4084 -0.2387
vn -0.8237 0.3840 -0.4172
vn -0.6018 0.2592 -0.7554
vn -0.5246 0.2402 -0.8167
vn -0.7492 0.3524 -0.5608
vn -0.3298 0.1456 -0.9328
vn -0.2399 0.1055 -0.9650
vn -0.9017 0.4120 -0.1308
vn -0.9092 0.3938 -0.1352
vn -0.8969 0.4189 -0.1419
vn -0.8173 0.3805 -0.4327
vn -0.5827 0.2528 -0.7723
vn -0.5021 0.2290 -0.8339
vn -0.7353 0.3458 -0.5829
vn -0.6619 0.2863 -0.6928
vn -0.8396 0.3596 -0.4070
vn -0.8719 0.3977 -0.2855
vn -0.9035 0.4116 -0.1198
vn -0.9124 0.3890 -0.1275
vn -0.8964 0.4226 -0.1336
vn -0.6803 0.2937 -0.6715
vn -0.8463 0.3607 -0.3920
vn -0.8766 0.3982 -0.2700
vn -0.9136 0.4065 -0.0120
vn -0.9129 0.4063 -0.0399
vn -0.9137 0.3850 -0.1301
vn -0.9157 0.4016 -0.0149
vn -0.8792 0.3618 -0.3100
vn -0.9157 0.4015 -0.0148
vn -0.9137 0.3851 -0.1299
vn -0.9075 0.3952 -0.1421
vn -0.9136 0.4065 -0.0119
vn -0.9129 0.4063 -0.0396
vn -0.8792 0.3620 -0.3098
vn -0.8341 0.3543 -0.4227
vn -0.6475 0.2756 -0.7105
s 1
f 1//1 3//2 4//3 2//4
f 5//5 7//6 8//7 6//8
f 9//9 11//10 12//11 10//11
f 13//12 15//12 16//13 14//13
f 3//2 9//9 10//11 4//3
f 7//6 13//12 14//13 8//7
f 2//4 4//3 7//6 5//5
f 10//11 12//11 15//12 13//12
f 4//3 10//11 13//12 7//6
f 20//14 21//15 23//16 22//17
f 18//18 21//15 20//14 17//19
f 18//18 19//20 23//16 21//15
f 24//21 25//22 27//23 26//24
f 29//25 30//26 32//27 31//28
f 35//29 36//23 38//30 37//31
f 34//23 36//23 35//29 33//32
f 39//33 40//34 42//35 41//36
f 43//37 44//38 47//39 46//40
f 20//14 22//17 40//34 39//33
f 32//27 45//41 44//38 31//28
f 29//25 31//28 44//38 43//37
f 22//17 23//16 30//26 29//25
f 19//20 28//42 30//26 23//16
f 40//34 43//37 46//40 42//35
f 26//24 27//23 34//23 33//32
f 18//18 24//21 26//24 19//20
f 30//26 35//29 37//31 32//27
f 33//32 35//29 30//26 28//42
f 19//20 26//24 33//32 28//42
f 22//17 29//25 43//37 40//34
f 1//1 2//4 18//18 17//19
f 1//1 17//19 20//14 3//2
f 9//9 39//33 41//36 11//10
f 5//5 6//8 25//22 24//21
f 2//4 5//5 24//21 18//18
f 3//2 20//14 39//33 9//9
f 51//43 52//44 54//45 53//46
f 54//45 57//47 56//48 53//46
f 51//43 53//46 56//48 55//49
f 58//50 59//30 61//30 60//51
f 63//52 64//53 66//54 65//55
f 69//56 70//30 72//30 71//57
f 68//30 70//30 69//56 67//58
f 50//30 59//30 58//50 49//59
f 56//48 57//47 64//53 63//52
f 54//45 62//60 64//53 57//47
f 60//51 61//30 68//30 67//58
f 52//44 58//50 60//51 54//45
f 64//53 69//56 71//57 66//54
f 67//58 69//56 64//53 62//60
f 54//45 60//51 67//58 62//60
f 49//59 58//50 52//44 48//61
f 75//62 76//30 78//30 77//63
f 73//64 75//62 77//63 74//65
f 71//57 72//30 76//30 75//62
f 66//54 71//57 75//62 73//64
f 44//38 45//41 52//44 51//43
f 44//38 51//43 55//49 47//39
f 37//31 38//30 50//30 49//59
f 32//27 37//31 49//59 48//61
f 32//27 48//61 52//44 45//41
f 79//66 81//66 82//11 80//11
f 83//12 85//12 86//13 84//13
f 87//66 89//67 90//11 88//11
f 91//12 93//12 94//13 92//13
f 81//66 87//66 88//11 82//11
f 85//12 91//12 92//13 86//13
f 80//11 82//11 85//12 83//12
f 88//11 90//11 93//12 91//12
f 82//11 88//11 91//12 85//12
f 95//68 96//69 98//70 97//71
f 99//72 100//73 102//74 101//75
f 103//71 104//70 106//76 105//77
f 107//78 108//79 110//80 109//81
f 97//71 98//70 104//70 103//71
f 101//75 102//74 108//79 107//78
f 96//69 99//72 101//75 98//70
f 104//70 107//78 109//81 106//76
f 98//70 101//75 107//78 104//70
f 111//82 113//83 114//84 112//85
f 115//86 117//87 118//88 116//89
f 117//87 120//90 121//91 118//88
f 112//85 114//84 117//87 115//86
f 114//84 119//92 120//90 117//87
f 122//93 123//94 126//95 124//96
f 127//97 128//98 130//99 129//100
f 133//101 134//102 132//103 131//104
f 137//105 138//106 136//107 135//108
f 137//105 139//109 140//110 138//106
f 143//111 144//112 142//113 141//114
f 143//111 146//115 147//116 144//112
f 142//113 144//112 147//116 145//117
f 151//118 152//119 150//120 149//121
f 124//96 131//104 132//103 125//122
f 124//96 126//95 133//101 131//104
f 129//100 130//99 143//111 141//114
f 123//94 127//97 129//100 126//95
f 141//114 142//113 134//102 133//101
f 149//121 150//120 140//110 139//109
f 137//105 148//123 149//121 139//109
f 134//102 137//105 135//108 132//103
f 147//116 151//118 149//121 145//117
f 142//113 145//117 149//121 148//123
f 142//113 148//123 137//105 134//102
f 126//95 129//100 141//114 133//101
f 89//67 111//82 112//85 90//11
f 93//12 115//86 116//89 94//13
f 90//11 112//85 115//86 93//12
f 105//77 106//76 123//94 122//93
f 109//81 110//80 128//98 127//97
f 106//76 109//81 127//97 123//94
f 79//66 95//68 97//71 81//66
f 87//66 103//71 105//77 89//67
f 81//66 97//71 103//71 87//66
f 124//96 125//122 114//84 113//83
f 111//82 122//93 124//96 113//83
f 135//108 136//107 121//91 120//90
f 132//103 135//108 120//90 119//92
f 114//84 125//122 132//103 119//92
f 89//67 105//77 122//93 111//82
f 153//124 154//125 156//126 155//127
f 157//128 158//129 161//130 160//131
f 162//79 163//132 165//79 164//79
f 166//133 167//134 169//135 168//79
f 155//127 156//126 163//132 162//79
f 160//131 161//130 167//134 166//133
f 154//125 157//128 160//131 156//126
f 163//132 166//133 168//79 165//79
f 156//126 160//131 166//133 163//132
f 170//136 171//137 173//138 172//139
f 170//136 172//139 175//140 174//141
f 181//142 182//143 184//144 183//145
f 179//146 182//143 181//142 178//147
f 179//146 180//148 184//144 182//143
f 185//149 186//23 188//23 187//150
f 188//23 190//23 189//151 187//150
f 191//152 192//153 194//154 193//155
f 195//156 196//157 198//158 197//159
f 174//141 175//140 192//153 191//152
f 181//142 183//145 196//157 195//156
f 172//139 173//138 179//146 178//147
f 172//139 178//147 181//142 175//140
f 192//153 195//156 197//159 194//154
f 176//160 177//30 186//23 185//149
f 179//146 185//149 187//150 180//148
f 187//150 189//151 184//144 180//148
f 173//138 176//160 185//149 179//146
f 175//140 181//142 195//156 192//153
f 199//161 200//162 202//163 201//164
f 203//165 204//79 206//166 205//167
f 211//168 212//169 210//170 209//171
f 207//172 208//173 211//168 209//171
f 215//174 216//175 218//176 217//177
f 201//164 202//163 208//173 207//172
f 205//167 206//166 216//175 215//174
f 200//162 203//165 205//167 202//163
f 208//173 215//174 217//177 211//168
f 202//163 205//167 215//174 208//173
f 219//79 220//178 222//79 221//179
f 223//180 224//181 226//79 225//79
f 227//182 228//183 230//184 229//185
f 231//80 232//79 234//186 233//187
f 221//179 222//79 228//183 227//182
f 225//79 226//79 232//79 231//80
f 220//178 223//180 225//79 222//79
f 228//183 231//80 233//187 230//184
f 222//79 225//79 231//80 228//183
f 164//79 165//79 200//162 199//161
f 168//79 169//135 204//79 203//165
f 165//79 168//79 203//165 200//162
f 193//155 194//154 220//178 219//79
f 197//159 198//158 224//181 223//180
f 194//154 197//159 223//180 220//178
f 158//129 159//188 171//137 170//136
f 158//129 170//136 174//141 161//130
f 167//134 191//152 193//155 169//135
f 161//130 174//141 191//152 167//134
f 204//79 219//79 221//179 206//166
f 216//175 227//182 229//185 218//176
f 206//166 221//179 227//182 216//175
f 169//135 193//155 219//79 204//79
f 238//189 239//23 241//23 240//190
f 242//191 243//192 245//193 244//194
f 242//191 244//194 247//195 246//196
f 253//197 254//198 256//199 255//200
f 251//201 254//198 253//197 250//202
f 251//201 252//203 256//199 254//198
f 257//204 258//30 260//30 259//205
f 236//206 243//192 242//191 235//207
f 236//206 237//208 245//193 243//192
f 241//23 249//30 248//209 240//190
f 244//194 245//193 251//201 250//202
f 244//194 250//202 253//197 247//195
f 248//209 249//30 258//30 257//204
f 236//206 238//189 240//190 237//208
f 251//201 257//204 259//205 252//203
f 245//193 248//209 257//204 251//201
f 240//190 248//209 245//193 237//208
f 262//210 263//211 265//212 264//213
f 268//214 269//30 271//30 270//215
f 267//30 269//30 268//214 266//216
f 270//215 271//30 274//30 273//217
f 263//211 268//214 270//215 265//212
f 266//216 268//214 263//211 261//218
f 265//212 270//215 273//217 272//219
f 275//220 276//221 278//222 277//132
f 279//223 280//224 282//225 281//226
f 283//79 284//79 286//165 285//227
f 287//228 288//229 290//79 289//79
f 277//132 278//222 284//79 283//79
f 281//226 282//225 288//229 287//228
f 276//221 279//223 281//226 278//222
f 284//79 287//228 289//79 286//165
f 278//222 281//226 287//228 284//79
f 291//230 292//231 295//232 294//233
f 296//234 297//235 299//236 298//237
f 299//236 302//238 301//239 298//237
f 296//234 298//237 301//239 300//240
f 303//241 304//30 306//23 305//242
f 307//243 308//244 310//245 309//246
f 311//247 312//248 314//249 313//250
f 294//233 295//232 308//244 307//243
f 300//240 301//239 312//248 311//247
f 292//231 293//251 297//235 296//234
f 292//231 296//234 300//240 295//232
f 308//244 311//247 313//250 310//245
f 297//235 303//241 305//242 299//236
f 295//232 300//240 311//247 308//244
f 246//196 247//195 276//221 275//220
f 253//197 255//200 280//224 279//223
f 247//195 253//197 279//223 276//221
f 265//212 293//251 292//231 264//213
f 262//210 264//213 292//231 291//230
f 274//30 304//30 303//241 273//217
f 273//217 303//241 297//235 272//219
f 265//212 272//219 297//235 293//251
f 255//200 256//199 263//211 262//210
f 252//203 261//218 263//211 256//199
f 259//205 260//30 267//30 266//216
f 252//203 259//205 266//216 261//218
f 280//224 291//230 294//233 282//225
f 288//229 307//243 309//246 290//79
f 282//225 294//233 307//243 288//229
f 255//200 262//210 291//230 280//224
f 320//252 321//253 319//253 318//254
f 324//255 325//256 323//257 322//258
f 324//255 327//259 328//260 325//256
f 323//257 325//256 328//260 326//261
f 333//262 334//263 332//253 331//264
f 329//265 331//264 332//253 330//253
f 322//258 323//257 317//266 316//267
f 329//265 330//253 321//253 320//252
f 317//266 320//252 318//254 315//268
f 328//260 333//262 331//264 326//261
f 323//257 326//261 331//264 329//265
f 323//257 329//265 320//252 317//266
f 339//269 340//270 338//271 337//272
f 335//273 336//274 339//269 337//272
f 344//275 345//276 348//277 346//278
f 352//279 353//280 351//281 350//282
f 354//283 357//284 358//285 355//286
f 354//283 356//287 359//288 357//284
f 360//289 362//290 363//291 361//292
f 341//293 350//282 351//281 342//294
f 341//293 343//295 352//279 350//282
f 346//278 354//283 355//286 347//296
f 346//278 348//277 356//287 354//283
f 346//278 347//296 340//270 339//269
f 336//274 344//275 346//278 339//269
f 360//289 361//292 353//280 352//279
f 340//270 343//295 341//293 338//271
f 355//286 358//285 362//290 360//289
f 355//286 360//289 352//279 349//297
f 340//270 349//297 352//279 343//295
f 340//270 347//296 355//286 349//297
f 364//298 367//298 368//299 365//299
f 364//298 366//300 369//300 367//298
f 370//12 372//12 373//13 371//13
f 374//298 377//298 378//299 375//299
f 374//298 376//300 379//300 377//298
f 380//12 382//12 383//13 381//13
f 367//298 374//298 375//299 368//299
f 367//298 369//300 376//300 374//298
f 372//12 380//12 381//13 373//13
f 365//299 368//299 372//12 370//12
f 375//299 378//299 382//12 380//12
f 368//299 375//299 380//12 372//12
f 357//284 364//298 365//299 358//285
f 357//284 359//288 366//300 364//298
f 362//290 370//12 371//13 363//291
f 358//285 365//299 370//12 362//290
f 337//272 338//271 328//260 327//259
f 324//255 335//273 337//272 327//259
f 341//293 342//294 334//263 333//262
f 338//271 341//293 333//262 328//260
f 384//301 385//302 387//303 386//304
f 388//79 389//79 391//79 390//79
f 392//305 393//306 395//307 394//308
f 396//79 397//79 399//79 398//79
f 386//304 387//303 393//306 392//305
f 390//79 391//79 397//79 396//79
f 385//302 388//79 390//79 387//303
f 393//306 396//79 398//79 395//307
f 387//303 390//79 396//79 393//306
f 400//79 401//79 403//79 402//79
f 404//79 405//309 407//79 406//79
f 408//310 409//311 411//312 410//313
f 412//314 413//315 415//316 414//317
f 402//79 403//79 409//311 408//310
f 406//79 407//79 413//315 412//314
f 401//79 404//79 406//79 403//79
f 409//311 412//314 414//317 411//312
f 403//79 406//79 412//314 409//311
f 416//318 417//307 419//307 418//318
f 420//79 421//79 423//79 422//79
f 424//318 425//307 427//307 426//318
f 428//79 429//79 431//79 430//79
f 418//318 419//307 425//307 424//318
f 422//79 423//79 429//79 428//79
f 417//307 420//79 422//79 419//307
f 425//307 428//79 430//79 427//307
f 419//307 422//79 428//79 425//307
f 432//319 433//320 435//321 434//322
f 440//323 441//324 439//325 438//326
f 436//327 437//328 440//323 438//326
f 442//329 443//330 445//331 444//329
f 447//332 451//333 450//334 446//335
f 447//332 449//336 452//337 451//333
f 454//338 456//339 455//340 453//341
f 434//322 435//321 443//330 442//329
f 439//325 447//332 446//335 438//326
f 440//323 448//342 449//336 441//324
f 439//325 441//324 449//336 447//332
f 433//320 436//327 438//326 435//321
f 443//330 446//335 450//334 445//331
f 453//341 455//340 452//337 449//336
f 435//321 438//326 446//335 443//330
f 394//308 395//307 417//307 416//318
f 398//79 399//79 421//79 420//79
f 395//307 398//79 420//79 417//307
f 410//313 411//312 433//320 432//319
f 414//317 415//316 437//328 436//327
f 411//312 414//317 436//327 433//320
f 389//79 400//79 402//79 391//79
f 397//79 408//310 410//313 399//79
f 391//79 402//79 408//310 397//79
f 421//79 432//319 434//322 423//79
f 429//79 442//329 444//329 431//79
f 423//79 434//322 442//329 429//79
f 399//79 410//313 432//319 421//79
f 211//168 316//267 317//266 212//169
f 210//170 212//169 317//266 315//268
f 213//343 318//254 319//253 214//253
f 217//177 218//176 324//255 322//258
f 210//170 315//268 318//254 213//343
f 211//168 217//177 322//258 316//267
f 229//185 230//184 336//274 335//273
f 233//187 234//186 345//276 344//275
f 230//184 233//187 344//275 336//274
f 218//176 229//185 335//273 324//255
f 285//227 286//165 385//302 384//301
f 289//79 290//79 389//79 388//79
f 286//165 289//79 388//79 385//302
f 309//246 310//245 401//79 400//79
f 313//250 314//249 405//309 404//79
f 310//245 313//250 404//79 401//79
f 290//79 309//246 400//79 389//79
f 183//145 184//144 236//206 235//207
f 196//157 242//191 246//196 198//158
f 189//151 190//23 239//23 238//189
f 184//144 189//151 238//189 236//206
f 183//145 235//207 242//191 196//157
f 224//181 275//220 277//132 226//79
f 232//79 283//79 285//227 234//186
f 226//79 277//132 283//79 232//79
f 198//158 246//196 275//220 224//181
f 345//276 384//301 386//304 348//277
f 356//287 392//305 394//308 359//288
f 348//277 386//304 392//305 356//287
f 366//300 416//318 418//318 369//300
f 376//300 424//318 426//318 379//300
f 369//300 418//318 424//318 376//300
f 359//288 394//308 416//318 366//300
f 234//186 285//227 384//301 345//276
f 460//344 461//345 463//346 462//347
f 467//348 468//349 470//350 469//351
f 465//352 469//351 470//350 466//353
f 464//354 466//353 470//350 468//349
f 471//355 472//345 474//346 473//356
f 471//355 475//357 476//345 472//345
f 458//358 459//359 468//349 467//348
f 462//347 463//346 476//345 475//357
f 457//360 460//344 462//347 459//359
f 464//354 471//355 473//356 466//353
f 464//354 468//349 475//357 471//355
f 459//359 462//347 475//357 468//349
f 477//361 479//362 480//363 478//364
f 481//365 483//366 484//367 482//368
f 485//369 487//66 488//11 486//11
f 489//12 491//12 492//13 490//13
f 479//362 485//369 486//11 480//363
f 483//366 489//12 490//13 484//367
f 478//364 480//363 483//366 481//365
f 486//11 488//11 491//12 489//12
f 480//363 486//11 489//12 483//366
f 493//370 494//371 496//372 495//373
f 493//370 495//373 498//374 497//375
f 501//376 502//377 504//378 503//379
f 505//380 506//381 508//70 507//71
f 509//382 510//383 512//79 511//78
f 497//375 498//374 506//381 505//380
f 503//379 504//378 510//383 509//382
f 495//373 501//376 503//379 498//374
f 506//381 509//382 511//78 508//70
f 498//374 503//379 509//382 506//381
f 458//358 495//373 496//372 459//359
f 457//360 459//359 496//372 494//371
f 460//344 499//384 500//385 461//345
f 467//348 469//351 502//377 501//376
f 457//360 494//371 499//384 460//344
f 458//358 467//348 501//376 495//373
f 477//361 478//364 494//371 493//370
f 477//361 493//370 497//375 479//362
f 485//369 505//380 507//71 487//66
f 481//365 482//368 500//385 499//384
f 478//364 481//365 499//384 494//371
f 479//362 497//375 505//380 485//369
f 513//298 516//298 517//299 514//299
f 513//298 515//300 518//300 516//298
f 519//12 521//12 522//13 520//13
f 523//298 526//298 527//299 524//299
f 523//298 525//300 528//300 526//298
f 529//12 531//12 532//13 530//13
f 516//298 523//298 524//299 517//299
f 516//298 518//300 525//300 523//298
f 521//12 529//12 530//13 522//13
f 514//299 517//299 521//12 519//12
f 524//299 527//299 531//12 529//12
f 517//299 524//299 529//12 521//12
f 533//298 536//298 537//299 534//299
f 533//298 535//300 538//300 536//298
f 539//12 541//12 542//13 540//13
f 546//386 549//387 550//388 547//389
f 546//386 548//390 551//391 549//387
f 552//392 554//393 555//394 553//395
f 536//298 546//386 547//389 537//299
f 536//298 538//300 548//390 546//386
f 541//12 552//392 553//395 542//13
f 544//396 545//397 555//394 554//393
f 534//299 537//299 541//12 539//12
f 547//389 550//388 554//393 552//392
f 543//398 544//396 554//393 550//388
f 537//299 547//389 552//392 541//12
f 526//298 533//298 534//299 527//299
f 526//298 528//300 535//300 533//298
f 531//12 539//12 540//13 532//13
f 527//299 534//299 539//12 531//12
f 556//318 557//307 559//307 558//318
f 560//79 561//79 563//79 562//79
f 564//318 565//307 567//307 566//318
f 568//79 569//79 571//79 570//79
f 558//318 559//307 565//307 564//318
f 562//79 563//79 569//79 568//79
f 557//307 560//79 562//79 559//307
f 565//307 568//79 570//79 567//307
f 559//307 562//79 568//79 565//307
f 572//329 573//331 575//331 574//329
f 577//399 580//399 579//334 576//334
f 577//399 578//400 581//400 580//399
f 583//401 585//401 584//402 582//402
f 586//329 587//331 589//403 588//329
f 591//404 594//405 593//406 590//407
f 591//404 592//408 596//409 594//405
f 598//410 600//411 599//412 597//413
f 574//329 575//331 587//331 586//329
f 580//399 591//404 590//407 579//334
f 580//399 581//400 592//408 591//404
f 585//401 598//410 597//413 584//402
f 573//331 576//334 579//334 575//331
f 587//331 590//407 593//406 589//403
f 582//402 584//402 581//400 578//400
f 597//413 599//412 596//409 592//408
f 584//402 597//413 592//408 581//400
f 575//331 579//334 590//407 587//331
f 601//318 602//307 604//307 603//318
f 605//79 606//79 608//79 607//79
f 609//414 610//307 612//415 611//416
f 613//79 614//79 616//79 615//79
f 603//318 604//307 610//307 609//414
f 607//79 608//79 614//79 613//79
f 602//307 605//79 607//79 604//307
f 610//307 613//79 615//79 612//415
f 604//307 607//79 613//79 610//307
f 617//417 618//418 620//419 619//420
f 621//421 622//422 624//423 623//424
f 621//421 623//424 626//425 625//426
f 627//427 628//428 630//429 629//430
f 631//431 632//432 634//433 633//434
f 619//420 620//419 628//428 627//427
f 625//426 626//425 632//432 631//431
f 618//418 621//421 625//426 620//419
f 628//428 631//431 633//434 630//429
f 620//419 625//426 631//431 628//428
f 566//318 567//307 602//307 601//318
f 570//79 571//79 606//79 605//79
f 567//307 570//79 605//79 602//307
f 588//329 589//403 618//418 617//417
f 594//405 622//422 621//421 593//406
f 595//435 623//424 624//423 596//409
f 594//405 596//409 624//423 622//422
f 589//403 593//406 621//421 618//418
f 561//79 572//329 574//329 563//79
f 569//79 586//329 588//329 571//79
f 563//79 574//329 586//329 569//79
f 606//79 617//417 619//420 608//79
f 614//79 627//427 629//430 616//79
f 608//79 619//420 627//427 614//79
f 571//79 588//329 617//417 606//79
f 638//436 639//346 641//437 640//438
f 643//439 644//440 646//441 645//442
f 647//443 648//444 650//445 649//446
f 647//443 651//447 652//448 648//444
f 647//443 649//446 653//449 651//447
f 654//450 655//451 657//452 656//453
f 654//450 656//453 659//454 658//455
f 662//456 663//457 665//458 664//459
f 636//460 656//453 657//452 637//461
f 635//462 637//461 657//452 655//451
f 638//436 660//463 661//345 639//346
f 643//439 645//442 663//457 662//456
f 636//460 637//461 644//440 643//439
f 656//453 662//456 664//459 659//454
f 640//438 641//437 652//448 651//447
f 635//462 638//436 640//438 637//461
f 644//440 651//447 653//449 646//441
f 642//464 646//441 653//449 649//446
f 637//461 640//438 651//447 644//440
f 635//462 655//451 660//463 638//436
f 636//460 643//439 662//456 656//453
f 666//465 667//466 669//467 668//468
f 666//465 670//469 671//470 667//466
f 666//465 668//468 672//471 670//469
f 673//472 674//473 676//345 675//474
f 677//475 679//476 681//477 680//478
f 682//479 683//480 685//481 684//482
f 686//483 687//484 689//79 688//485
f 670//469 672//471 683//480 682//479
f 680//478 681//477 687//484 686//483
f 668//468 669//467 678//486 677//475
f 668//468 677//475 680//478 672//471
f 683//480 686//483 688//485 685//481
f 667//466 673//472 675//474 669//467
f 672//471 680//478 686//483 683//480
f 690//487 691//488 693//489 692//490
f 694//491 695//492 697//79 696//493
f 698//494 699//79 701//495 700//79
f 702//79 703//496 705//497 704//498
f 692//490 693//489 699//79 698//494
f 696//493 697//79 703//496 702//79
f 691//488 694//491 696//493 693//489
f 699//79 702//79 704//498 701//495
f 693//489 696//493 702//79 699//79
f 706//499 707//79 709//500 708//79
f 710//79 711//79 713//501 712//502
f 714//503 715//504 717//505 716//506
f 718//507 719//508 721//509 720//510
f 708//79 709//500 715//504 714//503
f 712//502 713//501 719//508 718//507
f 707//79 710//79 712//502 709//500
f 715//504 718//507 720//510 717//505
f 709//500 712//502 718//507 715//504
f 658//455 659//454 691//488 690//487
f 664//459 665//458 695//492 694//491
f 659//454 664//459 694//491 691//488
f 684//482 685//481 707//79 706//499
f 688//485 689//79 711//79 710//79
f 685//481 688//485 710//79 707//79
f 645//442 646//441 671//470 670//469
f 642//464 667//466 671//470 646//441
f 663//457 682//479 684//482 665//458
f 649//446 650//445 674//473 673//472
f 642//464 649//446 673//472 667//466
f 645//442 670//469 682//479 663//457
f 695//492 706//499 708//79 697//79
f 703//496 714//503 716//506 705//497
f 697//79 708//79 714//503 703//496
f 665//458 684//482 706//499 695//492
f 722//511 723//512 725//513 724//514
f 726//79 727//79 729//79 728//79
f 730//515 731//516 733//79 732//79
f 734//79 735//79 737//498 736//517
f 724//514 725//513 731//516 730//515
f 728//79 729//79 735//79 734//79
f 723//512 726//79 728//79 725//513
f 731//516 734//79 736//517 733//79
f 725//513 728//79 734//79 731//516
f 738//79 739//79 741//79 740//79
f 742//79 743//79 745//502 744//500
f 746//496 747//503 749//518 748//519
f 750//520 751//521 753//522 752//523
f 740//79 741//79 747//503 746//496
f 744//500 745//502 751//521 750//520
f 739//79 742//79 744//500 741//79
f 747//503 750//520 752//523 749//518
f 741//79 744//500 750//520 747//503
f 754//524 755//525 757//526 756//527
f 758//528 759//529 761//530 760//531
f 766//532 767//533 765//534 764//535
f 762//536 763//537 766//532 764//535
f 771//538 772//539 770//540 769//541
f 770//540 774//542 773//543 769//541
f 770//540 772//539 775//544 774//542
f 778//545 779//546 777//547 776//548
f 756//527 757//526 763//537 762//536
f 760//531 761//530 771//538 769//541
f 755//525 758//528 760//531 757//526
f 773//543 774//542 767//533 766//532
f 763//537 769//541 773//543 766//532
f 775//544 778//545 776//548 774//542
f 774//542 776//548 768//549 767//533
f 757//526 760//531 769//541 763//537
f 780//550 781//551 783//552 782//553
f 790//554 791//555 789//556 788//557
f 787//558 791//555 790//554 786//559
f 785//560 786//559 790//554 788//557
f 794//561 795//562 793//562 792//563
f 798//564 799//565 797//566 796//567
f 803//568 804//562 802//562 801//569
f 802//562 806//562 805//570 801//569
f 784//571 799//565 798//564 783//552
f 782//553 783//552 798//564 796//567
f 793//562 809//562 808//572 792//563
f 788//557 789//556 784//571 783//552
f 781//551 785//560 788//557 783//552
f 808//572 809//562 804//562 803//568
f 791//555 794//561 792//563 789//556
f 799//565 803//568 801//569 797//566
f 801//569 805//570 800//573 797//566
f 807//574 808//572 803//568 799//565
f 792//563 808//572 807//574 789//556
f 784//571 789//556 807//574 799//565
f 732//79 733//79 755//525 754//524
f 736//517 737//498 759//529 758//528
f 733//79 736//517 758//528 755//525
f 748//519 749//518 781//551 780//550
f 752//523 753//522 786//559 785//560
f 749//518 752//523 785//560 781//551
f 727//79 738//79 740//79 729//79
f 735//79 746//496 748//519 737//498
f 729//79 740//79 746//496 735//79
f 759//529 780//550 782//553 761//530
f 796//567 797//566 772//539 771//538
f 772//539 797//566 800//573 775//544
f 805//570 806//562 779//546 778//545
f 800//573 805//570 778//545 775//544
f 761//530 782//553 796//567 771//538
f 737//498 748//519 780//550 759//529
f 544//396 675//474 676//345 545//397
f 549//387 677//475 678//486 550//388
f 549//387 551//391 679//476 677//475
f 543//398 669//467 675//474 544//396
f 543//398 550//388 678//486 669//467
f 611//416 612//415 723//512 722//511
f 615//79 616//79 727//79 726//79
f 612//415 615//79 726//79 723//512
f 629//430 630//429 739//79 738//79
f 633//434 634//433 743//79 742//79
f 630//429 633//434 742//79 739//79
f 616//79 629//430 738//79 727//79
f 515//300 556//318 558//318 518//300
f 525//300 564//318 566//318 528//300
f 518//300 558//318 564//318 525//300
f 535//300 601//318 603//318 538//300
f 548//390 609//414 611//416 551//391
f 538//300 603//318 609//414 548//390
f 528//300 566//318 601//318 535//300
f 679//476 722//511 724//514 681//477
f 687//484 730//515 732//79 689//79
f 681//477 724//514 730//515 687//484
f 711//79 754//524 756//527 713//501
f 719//508 762//536 764//535 721//509
f 713//501 756//527 762//536 719//508
f 689//79 732//79 754//524 711//79
f 551//391 611//416 722//511 679//476
f 377//298 513//298 514//299 378//299
f 377//298 379//300 515//300 513//298
f 382//12 519//12 520//13 383//13
f 378//299 514//299 519//12 382//12
f 426//318 427//307 557//307 556//318
f 430//79 431//79 561//79 560//79
f 427//307 430//79 560//79 557//307
f 444//329 445//331 573//331 572//329
f 451//333 577//399 576//334 450//334
f 451//333 452//337 578//400 577//399
f 456//339 583//401 582//402 455//340
f 455//340 582//402 578//400 452//337
f 445//331 450//334 576//334 573//331
f 431//79 444//329 572//329 561//79
f 379//300 426//318 556//318 515//300
f 100//73 153//124 155//127 102//74
f 108//79 162//79 164//79 110//80
f 102//74 155//127 162//79 108//79
f 128//98 199//161 201//164 130//99
f 209//171 210//170 147//116 146//115
f 143//111 207//172 209//171 146//115
f 213//343 214//253 152//119 151//118
f 210//170 213//343 151//118 147//116
f 130//99 201//164 207//172 143//111
f 110//80 164//79 199//161 128//98
f 465//352 466//353 655//451 654//450
f 465//352 654//450 658//455 469//351
f 473//356 474//346 661//345 660//463
f 466//353 473//356 660//463 655//451
f 502//377 690//487 692//490 504//378
f 510//383 698//494 700//79 512//79
f 504//378 692//490 698//494 510//383
f 469//351 658//455 690//487 502//377
f 11//10 79//66 80//11 12//11
f 15//12 83//12 84//13 16//13
f 12//11 80//11 83//12 15//12
f 41//36 42//35 96//69 95//68
f 46//40 47//39 100//73 99//72
f 42//35 46//40 99//72 96//69
f 11//10 41//36 95//68 79//66
f 55//49 56//48 154//125 153//124
f 66//54 159//188 158//129 65//55
f 63//52 65//55 158//129 157//128
f 56//48 63//52 157//128 154//125
f 73//64 74//65 173//138 171//137
f 78//30 177//30 176//160 77//63
f 77//63 176//160 173//138 74//65
f 66//54 73//64 171//137 159//188
f 47//39 55//49 153//124 100//73
f 810//575 812//576 813//577 811//578
f 814//579 816//580 817//581 815//582
f 818//583 820//583 821//584 819//584
f 822//585 824//585 825//586 823//587
f 812//576 818//583 819//584 813//577
f 816//580 822//585 823//587 817//581
f 811//578 813//577 816//580 814//579
f 819//584 821//584 824//585 822//585
f 813//577 819//584 822//585 816//580
f 826//588 827//589 829//590 828//591
f 833//592 834//593 836//594 835//595
f 831//596 834//593 833//592 830//597
f 833//592 835//595 832//598 830//597
f 839//591 840//599 842//600 841//591
f 838//601 840//599 839//591 837//591
f 844//602 845//603 847//604 846//605
f 850//606 851//607 849//608 848//609
f 855//610 856//611 854//612 852//613
f 848//609 849//608 836//594 834//593
f 847//604 854//612 853//614 846//605
f 852//613 854//612 847//604 845//603
f 828//591 829//590 838//601 837//591
f 835//595 836//594 845//603 844//602
f 835//595 844//602 843//615 832//598
f 851//607 855//610 852//613 849//608
f 827//589 830//597 832//598 829//590
f 840//599 844//602 846//605 842//600
f 843//615 844//602 840//599 838//601
f 829//590 832//598 843//615 838//601
f 849//608 852//613 845//603 836//594
f 810//575 811//578 827//589 826//588
f 814//579 815//582 831//596 830//597
f 817//581 834//593 831//596 815//582
f 825//586 850//606 848//609 823//587
f 811//578 814//579 830//597 827//589
f 823//587 848//609 834//593 817//581
f 860//591 861//616 863//617 862//591
f 864//618 865//619 867//620 866//621
f 867//620 870//622 869//623 866//621
f 868//624 870//622 867//620 865//619
f 873//591 874//625 876//626 875//591
f 872//627 874//625 873//591 871//591
f 878//628 879//629 881//630 880//631
f 858//632 861//616 860//591 857//591
f 862//591 863//617 872//627 871//591
f 869//623 870//622 879//629 878//628
f 869//623 878//628 877//633 866//621
f 861//616 864//618 866//621 863//617
f 874//625 878//628 880//631 876//626
f 877//633 878//628 874//625 872//627
f 863//617 866//621 877//633 872//627
f 859//634 864//618 861//616 858//632
f 882//591 883//635 885//636 884//591
f 883//635 886//637 887//638 885//636
f 875//591 876//626 883//635 882//591
f 876//626 880//631 886//637 883//635
f 841//591 842//600 858//632 857//591
f 853//614 854//612 865//619 864//618
f 856//611 868//624 865//619 854//612
f 842//600 846//605 859//634 858//632
f 853//614 864//618 859//634 846//605
f 888//583 890//583 891//584 889//584
f 892//585 894//585 895//639 893//639
f 896//583 898//583 899//584 897//584
f 900//585 902//585 903//640 901//639
f 890//583 896//583 897//584 891//584
f 894//585 900//585 901//639 895//639
f 889//584 891//584 894//585 892//585
f 897//584 899//584 902//585 900//585
f 891//584 897//584 900//585 894//585
f 906//641 907//642 905//643 904//644
f 910//645 911//646 909//647 908//648
f 914//649 915//650 913//642 912//641
f 918//651 919//652 917//653 916//654
f 912//641 913//642 907//642 906//641
f 916//654 917//653 911//646 910//645
f 907//642 910//645 908//648 905//643
f 915//650 918//651 916//654 913//642
f 913//642 916//654 910//645 907//642
f 920//655 922//656 923//657 921//658
f 924//659 926//660 927//661 925//662
f 922//656 928//663 929//664 923//657
f 921//658 923//657 926//660 924//659
f 923//657 929//664 930//665 926//660
f 934//666 935//667 932//668 931//669
f 938//670 939//671 937//672 936//673
f 942//674 943//675 941//676 940//677
f 942//674 944//678 945//679 943//675
f 948//680 949//681 947//682 946//683
f 953//684 954//685 952//686 951//687
f 957//688 958//689 956//690 955//691
f 957//688 960//692 961//693 958//689
f 959//694 960//692 957//688 955//691
f 933//695 946//683 947//682 934//666
f 947//682 949//681 935//667 934//666
f 956//690 958//689 939//671 938//670
f 951//687 952//686 945//679 944//678
f 945//679 952//686 950//696 943//675
f 935//667 938//670 936//673 932//668
f 955//691 956//690 949//681 948//680
f 943//675 948//680 946//683 941//676
f 954//685 960//692 959//694 952//686
f 950//696 952//686 959//694 955//691
f 950//696 955//691 948//680 943//675
f 949//681 956//690 938//670 935//667
f 898//583 920//655 921//658 899//584
f 902//585 924//659 925//662 903//640
f 899//584 921//658 924//659 902//585
f 931//669 932//668 915//650 914//649
f 936//673 937//672 919//652 918//651
f 932//668 936//673 918//651 915//650
f 895//639 906//641 904//644 893//639
f 903//640 914//649 912//641 901//639
f 901//639 912//641 906//641 895//639
f 940//677 941//676 929//664 928//663
f 933//695 934//666 927//661 926//660
f 927//661 934//666 931//669 925//662
f 941//676 946//683 930//665 929//664
f 930//665 946//683 933//695 926//660
f 925//662 931//669 914//649 903//640
f 964//697 965//698 963//699 962//700
f 969//701 970//702 968//703 966//704
f 973//653 974//653 972//705 971//653
f 977//653 978//706 976//707 975//708
f 971//653 972//705 965//698 964//697
f 975//708 976//707 970//702 969//701
f 965//698 969//701 966//704 963//699
f 974//653 977//653 975//708 972//705
f 972//705 975//708 969//701 965//698
f 981//709 982//710 984//711 983//712
f 985//713 986//714 984//711 982//710
f 987//591 988//715 990//716 989//591
f 990//716 992//717 991//591 989//591
f 996//718 997//719 999//720 998//721
f 994//722 997//719 996//718 993//723
f 996//718 998//721 995//724 993//723
f 1002//725 1003//726 1001//727 1000//728
f 1006//729 1007//730 1005//731 1004//732
f 1000//728 1001//727 986//714 985//713
f 1004//732 1005//731 999//720 997//719
f 979//591 980//733 988//715 987//591
f 983//712 984//711 994//722 993//723
f 986//714 997//719 994//722 984//711
f 1003//726 1006//729 1004//732 1001//727
f 988//715 993//723 995//724 990//716
f 995//724 998//721 992//717 990//716
f 980//733 983//712 993//723 988//715
f 1001//727 1004//732 997//719 986//714
f 1010//734 1011//735 1009//736 1008//737
f 1014//738 1015//739 1013//653 1012//740
f 1022//741 1023//742 1021//743 1020//744
f 1021//743 1023//742 1019//745 1018//746
f 1026//747 1027//748 1025//749 1024//750
f 1018//746 1019//745 1011//735 1010//734
f 1024//750 1025//749 1015//739 1014//738
f 1011//735 1014//738 1012//740 1009//736
f 1023//742 1026//747 1024//750 1019//745
f 1019//745 1024//750 1014//738 1011//735
f 1030//751 1031//653 1029//752 1028//653
f 1034//653 1035//653 1033//753 1032//754
f 1038//755 1039//756 1037//757 1036//758
f 1042//759 1043//760 1041//653 1040//652
f 1036//758 1037//757 1031//653 1030//751
f 1040//652 1041//653 1035//653 1034//653
f 1031//653 1034//653 1032//754 1029//752
f 1039//756 1042//759 1040//652 1037//757
f 1037//757 1040//652 1034//653 1031//653
f 1008//737 1009//736 974//653 973//653
f 1012//740 1013//653 978//706 977//653
f 1009//736 1012//740 977//653 974//653
f 1028//653 1029//752 1003//726 1002//725
f 1032//754 1033//753 1007//730 1006//729
f 1029//752 1032//754 1006//729 1003//726
f 967//761 968//703 982//710 981//709
f 970//702 985//713 982//710 968//703
f 978//706 1002//725 1000//728 976//707
f 976//707 1000//728 985//713 970//702
f 1015//739 1030//751 1028//653 1013//653
f 1027//748 1038//755 1036//758 1025//749
f 1025//749 1036//758 1030//751 1015//739
f 1013//653 1028//653 1002//725 978//706
f 1044//591 1045//762 1047//763 1046//591
f 1053//764 1054//765 1056//766 1055//767
f 1057//768 1058//769 1056//766 1054//765
f 1059//591 1060//770 1062//771 1061//591
f 1066//772 1067//773 1069//774 1068//775
f 1064//776 1067//773 1066//772 1063//777
f 1066//772 1068//775 1065//778 1063//777
f 1047//763 1052//779 1051//591 1046//591
f 1049//780 1054//765 1053//764 1048//781
f 1053//764 1055//767 1050//782 1048//781
f 1051//591 1052//779 1060//770 1059//591
f 1055//767 1056//766 1064//776 1063//777
f 1058//769 1067//773 1064//776 1056//766
f 1045//762 1048//781 1050//782 1047//763
f 1060//770 1063//777 1065//778 1062//771
f 1052//779 1055//767 1063//777 1060//770
f 1050//782 1055//767 1052//779 1047//763
f 1072//591 1073//783 1075//784 1074//591
f 1071//785 1073//783 1072//591 1070//591
f 1077//786 1078//787 1080//788 1079//789
f 1074//591 1075//784 1082//790 1081//591
f 1073//783 1077//786 1079//789 1075//784
f 1076//791 1077//786 1073//783 1071//785
f 1075//784 1079//789 1083//792 1082//790
f 1086//705 1087//793 1085//794 1084//795
f 1090//796 1091//797 1089//798 1088//799
f 1094//800 1095//740 1093//653 1092//653
f 1098//653 1099//653 1097//801 1096//802
f 1092//653 1093//653 1087//793 1086//705
f 1096//802 1097//801 1091//797 1090//796
f 1087//793 1090//796 1088//799 1085//794
f 1095//740 1098//653 1096//802 1093//653
f 1093//653 1096//802 1090//796 1087//793
f 1103//803 1104//804 1102//805 1100//806
f 1105//591 1106//807 1108//808 1107//591
f 1109//809 1110//810 1112//811 1111//812
f 1112//811 1115//813 1114//814 1111//812
f 1113//815 1115//813 1112//811 1110//810
f 1118//816 1119//817 1117//818 1116//819
f 1122//820 1123//821 1121//822 1120//823
f 1116//819 1117//818 1104//804 1103//803
f 1120//823 1121//822 1115//813 1113//815
f 1101//824 1102//805 1110//810 1109//809
f 1104//804 1113//815 1110//810 1102//805
f 1119//817 1122//820 1120//823 1117//818
f 1106//807 1109//809 1111//812 1108//808
f 1117//818 1120//823 1113//815 1104//804
f 1084//795 1085//794 1058//769 1057//768
f 1088//799 1089//798 1069//774 1067//773
f 1085//794 1088//799 1067//773 1058//769
f 1080//788 1102//805 1101//824 1079//789
f 1100//806 1102//805 1080//788 1078//787
f 1082//790 1106//807 1105//591 1081//591
f 1083//792 1109//809 1106//807 1082//790
f 1101//824 1109//809 1083//792 1079//789
f 1061//591 1062//771 1071//785 1070//591
f 1068//775 1069//774 1078//787 1077//786
f 1068//775 1077//786 1076//791 1065//778
f 1062//771 1065//778 1076//791 1071//785
f 1091//797 1103//803 1100//806 1089//798
f 1099//653 1118//816 1116//819 1097//801
f 1097//801 1116//819 1103//803 1091//797
f 1089//798 1100//806 1078//787 1069//774
f 1126//825 1127//826 1125//827 1124//825
f 1135//828 1136//829 1134//830 1133//825
f 1131//825 1133//825 1134//830 1132//831
f 1139//832 1140//833 1138//834 1137//835
f 1139//832 1142//836 1143//837 1140//833
f 1141//838 1142//836 1139//832 1137//835
f 1131//825 1132//831 1127//826 1126//825
f 1137//835 1138//834 1130//839 1129//840
f 1127//826 1129//840 1128//841 1125//827
f 1136//829 1142//836 1141//838 1134//830
f 1132//831 1134//830 1141//838 1137//835
f 1132//831 1137//835 1129//840 1127//826
f 1151//842 1152//843 1150//844 1149//845
f 1150//844 1152//843 1148//846 1147//847
f 1156//848 1157//849 1154//850 1153//851
f 1160//852 1161//853 1159//854 1158//855
f 1163//856 1165//857 1166//858 1164//859
f 1167//860 1170//861 1171//862 1168//863
f 1171//862 1172//864 1169//865 1168//863
f 1144//866 1158//855 1159//854 1145//867
f 1159//854 1161//853 1146//868 1145//867
f 1155//869 1167//860 1168//863 1156//848
f 1168//863 1169//865 1157//849 1156//848
f 1163//856 1164//859 1161//853 1160//852
f 1155//869 1156//848 1152//843 1151//842
f 1152//843 1156//848 1153//851 1148//846
f 1146//868 1151//842 1149//845 1145//867
f 1164//859 1166//858 1170//861 1167//860
f 1164//859 1167//860 1162//870 1161//853
f 1146//868 1161//853 1162//870 1151//842
f 1162//870 1167//860 1155//869 1151//842
f 1173//583 1175//583 1176//584 1174//584
f 1177//871 1180//871 1181//872 1178//872
f 1181//872 1182//873 1179//873 1178//872
f 1183//583 1185//583 1186//584 1184//584
f 1187//871 1190//871 1191//872 1188//872
f 1191//872 1192//873 1189//873 1188//872
f 1175//583 1183//583 1184//584 1176//584
f 1180//871 1187//871 1188//872 1181//872
f 1188//872 1189//873 1182//873 1181//872
f 1174//584 1176//584 1180//871 1177//871
f 1184//584 1186//584 1190//871 1187//871
f 1176//584 1184//584 1187//871 1180//871
f 1165//857 1173//583 1174//584 1166//858
f 1170//861 1177//871 1178//872 1171//862
f 1178//872 1179//873 1172//864 1171//862
f 1166//858 1174//584 1177//871 1170//861
f 1144//866 1145//867 1136//829 1135//828
f 1149//845 1150//844 1143//837 1142//836
f 1143//837 1150//844 1147//847 1140//833
f 1145//867 1149//845 1142//836 1136//829
f 1195//874 1196//875 1194//876 1193//877
f 1199//653 1200//653 1198//653 1197//653
f 1203//878 1204//879 1202//880 1201//881
f 1207//653 1208//653 1206//653 1205//653
f 1201//881 1202//880 1196//875 1195//874
f 1205//653 1206//653 1200//653 1199//653
f 1196//875 1199//653 1197//653 1194//876
f 1204//879 1207//653 1205//653 1202//880
f 1202//880 1205//653 1199//653 1196//875
f 1211//653 1212//653 1210//653 1209//653
f 1215//653 1216//653 1214//882 1213//653
f 1219//883 1220//884 1218//885 1217//886
f 1223//887 1224//888 1222//889 1221//890
f 1217//886 1218//885 1212//653 1211//653
f 1221//890 1222//889 1216//653 1215//653
f 1212//653 1215//653 1213//653 1210//653
f 1220//884 1223//887 1221//890 1218//885
f 1218//885 1221//890 1215//653 1212//653
f 1227//891 1228//879 1226//879 1225//891
f 1231//653 1232//653 1230//653 1229//653
f 1235//891 1236//879 1234//879 1233//891
f 1239//653 1240//653 1238//653 1237//653
f 1233//891 1234//879 1228//879 1227//891
f 1237//653 1238//653 1232//653 1231//653
f 1228//879 1231//653 1229//653 1226//879
f 1236//879 1239//653 1237//653 1234//879
f 1234//879 1237//653 1231//653 1228//879
f 1243//892 1244//893 1242//894 1241//895
f 1249//896 1250//897 1248//898 1247//899
f 1248//898 1250//897 1246//900 1245//901
f 1253//902 1254//903 1252//904 1251//902
f 1256//905 1258//906 1257//907 1255//908
f 1260//909 1264//910 1263//911 1259//912
f 1263//911 1265//913 1261//914 1259//912
f 1251//902 1252//904 1244//893 1243//892
f 1248//898 1260//909 1259//912 1247//899
f 1249//896 1261//914 1262//915 1250//897
f 1259//912 1261//914 1249//896 1247//899
f 1244//893 1248//898 1245//901 1242//894
f 1254//903 1264//910 1260//909 1252//904
f 1261//914 1265//913 1258//906 1256//905
f 1252//904 1260//909 1248//898 1244//893
f 1225//891 1226//879 1204//879 1203//878
f 1229//653 1230//653 1208//653 1207//653
f 1226//879 1229//653 1207//653 1204//879
f 1241//895 1242//894 1220//884 1219//883
f 1245//901 1246//900 1224//888 1223//887
f 1242//894 1245//901 1223//887 1220//884
f 1200//653 1211//653 1209//653 1198//653
f 1208//653 1219//883 1217//886 1206//653
f 1206//653 1217//886 1211//653 1200//653
f 1232//653 1243//892 1241//895 1230//653
f 1240//653 1253//902 1251//902 1238//653
f 1238//653 1251//902 1243//892 1232//653
f 1230//653 1241//895 1219//883 1208//653
f 1016//825 1124//825 1125//827 1017//916
f 1022//741 1129//840 1130//839 1023//742
f 1128//841 1129//840 1022//741 1020//744
f 1138//834 1140//833 1027//748 1026//747
f 1017//916 1125//827 1128//841 1020//744
f 1130//839 1138//834 1026//747 1023//742
f 1147//847 1148//846 1039//756 1038//755
f 1153//851 1154//850 1043//760 1042//759
f 1148//846 1153//851 1042//759 1039//756
f 1140//833 1147//847 1038//755 1027//748
f 1193//877 1194//876 1095//740 1094//800
f 1197//653 1198//653 1099//653 1098//653
f 1194//876 1197//653 1098//653 1095//740
f 1209//653 1210//653 1119//817 1118//816
f 1213//653 1214//882 1123//821 1122//820
f 1210//653 1213//653 1122//820 1119//817
f 1198//653 1209//653 1118//816 1099//653
f 991//591 992//717 1045//762 1044//591
f 998//721 999//720 1049//780 1048//781
f 1007//730 1057//768 1054//765 1005//731
f 992//717 998//721 1048//781 1045//762
f 1005//731 1054//765 1049//780 999//720
f 1035//653 1086//705 1084//795 1033//753
f 1043//760 1094//800 1092//653 1041//653
f 1041//653 1092//653 1086//705 1035//653
f 1033//753 1084//795 1057//768 1007//730
f 1157//849 1195//874 1193//877 1154//850
f 1172//864 1203//878 1201//881 1169//865
f 1169//865 1201//881 1195//874 1157//849
f 1182//873 1227//891 1225//891 1179//873
f 1192//873 1235//891 1233//891 1189//873
f 1189//873 1233//891 1227//891 1182//873
f 1179//873 1225//891 1203//878 1172//864
f 1154//850 1193//877 1094//800 1043//760
f 1266//917 1267//918 1269//919 1268//920
f 1273//917 1274//921 1276//922 1275//917
f 1273//917 1277//917 1278//923 1274//921
f 1282//924 1283//925 1285//926 1284//927
f 1280//928 1284//927 1285//926 1281//929
f 1282//924 1284//927 1280//928 1279//930
f 1268//920 1269//919 1278//923 1277//917
f 1271//931 1272//932 1283//925 1282//924
f 1267//918 1270//933 1271//931 1269//919
f 1274//921 1279//930 1280//928 1276//922
f 1274//921 1278//923 1282//924 1279//930
f 1269//919 1271//931 1282//924 1278//923
f 1286//934 1288//935 1289//936 1287//937
f 1290//938 1292//939 1293//940 1291//941
f 1294//583 1296//583 1297//584 1295//584
f 1298//585 1300//585 1301//639 1299//942
f 1288//935 1294//583 1295//584 1289//936
f 1292//939 1298//585 1299//942 1293//940
f 1287//937 1289//936 1292//939 1290//938
f 1295//584 1297//584 1300//585 1298//585
f 1289//936 1295//584 1298//585 1292//939
f 1304//943 1305//944 1307//945 1306//946
f 1308//947 1309//948 1307//945 1305//944
f 1312//949 1313//950 1311//951 1310//952
f 1316//641 1317//642 1315//953 1314//954
f 1320//654 1321//653 1319//955 1318//956
f 1314//954 1315//953 1309//948 1308//947
f 1318//956 1319//955 1313//950 1312//949
f 1309//948 1312//949 1310//952 1307//945
f 1317//642 1320//654 1318//956 1315//953
f 1315//953 1318//956 1312//949 1309//948
f 1266//917 1302//957 1303//958 1267//918
f 1271//931 1306//946 1307//945 1272//932
f 1304//943 1306//946 1271//931 1270//933
f 1310//952 1311//951 1285//926 1283//925
f 1267//918 1303//958 1304//943 1270//933
f 1307//945 1310//952 1283//925 1272//932
f 1286//934 1287//937 1303//958 1302//957
f 1290//938 1291//941 1305//944 1304//943
f 1293//940 1308//947 1305//944 1291//941
f 1301//639 1316//641 1314//954 1299//942
f 1287//937 1290//938 1304//943 1303//958
f 1299//942 1314//954 1308//947 1293//940
f 1322//583 1324//583 1325//584 1323//584
f 1326//871 1329//871 1330//872 1327//872
f 1330//872 1331//873 1328//873 1327//872
f 1332//583 1334//583 1335//584 1333//584
f 1336//871 1339//871 1340//872 1337//872
f 1340//872 1341//873 1338//873 1337//872
f 1324//583 1332//583 1333//584 1325//584
f 1329//871 1336//871 1337//872 1330//872
f 1337//872 1338//873 1331//873 1330//872
f 1323//584 1325//584 1329//871 1326//871
f 1333//584 1335//584 1339//871 1336//871
f 1325//584 1333//584 1336//871 1329//871
f 1342//583 1344//583 1345//584 1343//584
f 1346//871 1349//871 1350//872 1347//872
f 1350//872 1351//873 1348//873 1347//872
f 1355//959 1357//960 1358//961 1356//962
f 1359//963 1362//964 1363//965 1360//966
f 1363//965 1364//967 1361//968 1360//966
f 1344//583 1355//959 1356//962 1345//584
f 1349//871 1359//963 1360//966 1350//872
f 1360//966 1361//968 1351//873 1350//872
f 1352//969 1353//970 1358//961 1357//960
f 1343//584 1345//584 1349//871 1346//871
f 1356//962 1358//961 1362//964 1359//963
f 1353//970 1354//971 1362//964 1358//961
f 1345//584 1356//962 1359//963 1349//871
f 1334//583 1342//583 1343//584 1335//584
f 1339//871 1346//871 1347//872 1340//872
f 1347//872 1348//873 1341//873 1340//872
f 1335//584 1343//584 1346//871 1339//871
f 1367//891 1368//879 1366//879 1365//891
f 1371//653 1372//653 1370//653 1369//653
f 1375//891 1376//879 1374//879 1373//891
f 1379//653 1380//653 1378//653 1377//653
f 1373//891 1374//879 1368//879 1367//891
f 1377//653 1378//653 1372//653 1371//653
f 1368//879 1371//653 1369//653 1366//879
f 1376//879 1379//653 1377//653 1374//879
f 1374//879 1377//653 1371//653 1368//879
f 1383//902 1384//903 1382//903 1381//902
f 1386//972 1388//972 1387//973 1385//973
f 1390//910 1393//910 1392//974 1389//974
f 1392//974 1394//975 1391//975 1389//974
f 1397//902 1398//976 1396//903 1395//902
f 1400//977 1402//978 1401//979 1399//980
f 1404//981 1407//982 1406//983 1403//984
f 1406//983 1408//985 1405//986 1403//984
f 1395//902 1396//903 1384//903 1383//902
f 1388//972 1400//977 1399//980 1387//973
f 1393//910 1404//981 1403//984 1392//974
f 1403//984 1405//986 1394//975 1392//974
f 1384//903 1393//910 1390//910 1382//903
f 1398//976 1407//982 1404//981 1396//903
f 1391//975 1394//975 1388//972 1386//972
f 1405//986 1408//985 1402//978 1400//977
f 1394//975 1405//986 1400//977 1388//972
f 1396//903 1404//981 1393//910 1384//903
f 1412//891 1413//879 1411//879 1410//891
f 1416//653 1417//653 1415//653 1414//653
f 1420//987 1421//988 1419//879 1418//989
f 1424//653 1425//653 1423//653 1422//653
f 1418//989 1419//879 1413//879 1412//891
f 1422//653 1423//653 1417//653 1416//653
f 1413//879 1416//653 1414//653 1411//879
f 1421//988 1424//653 1422//653 1419//879
f 1419//879 1422//653 1416//653 1413//879
f 1428//990 1429//991 1427//992 1426//993
f 1430//994 1431//995 1433//996 1432//997
f 1434//998 1435//999 1433//996 1431//995
f 1438//1000 1439//1001 1437//1002 1436//1003
f 1442//1004 1443//1005 1441//1006 1440//1007
f 1436//1003 1437//1002 1429//991 1428//990
f 1440//1007 1441//1006 1435//999 1434//998
f 1429//991 1434//998 1431//995 1427//992
f 1439//1001 1442//1004 1440//1007 1437//1002
f 1437//1002 1440//1007 1434//998 1429//991
f 1410//891 1411//879 1376//879 1375//891
f 1414//653 1415//653 1380//653 1379//653
f 1411//879 1414//653 1379//653 1376//879
f 1426//993 1427//992 1398//976 1397//902
f 1407//982 1431//995 1430//994 1406//983
f 1408//985 1432//997 1433//996 1409//1008
f 1430//994 1432//997 1408//985 1406//983
f 1427//992 1431//995 1407//982 1398//976
f 1372//653 1383//902 1381//902 1370//653
f 1380//653 1397//902 1395//902 1378//653
f 1378//653 1395//902 1383//902 1372//653
f 1417//653 1428//990 1426//993 1415//653
f 1425//653 1438//1000 1436//1003 1423//653
f 1423//653 1436//1003 1428//990 1417//653
f 1415//653 1426//993 1397//902 1380//653
f 1444//920 1445//1009 1447//1010 1446//1011
f 1451//1012 1452//1013 1454//1014 1453//1015
f 1451//1012 1455//1016 1456//1017 1452//1013
f 1456//1017 1457//1018 1454//1014 1452//1013
f 1459//1019 1460//1020 1462//1021 1461//1022
f 1465//1023 1466//1024 1468//1025 1467//1026
f 1469//1027 1470//1028 1468//1025 1466//1024
f 1473//1029 1474//1030 1472//1031 1471//1032
f 1444//920 1463//917 1464//1033 1445//1009
f 1449//1034 1467//1026 1468//1025 1450//1035
f 1465//1023 1467//1026 1449//1034 1448//1036
f 1471//1032 1472//1031 1462//1021 1460//1020
f 1446//1011 1447//1010 1456//1017 1455//1016
f 1449//1034 1450//1035 1460//1020 1459//1019
f 1470//1028 1473//1029 1471//1032 1468//1025
f 1445//1009 1448//1036 1449//1034 1447//1010
f 1456//1017 1459//1019 1461//1022 1457//1018
f 1454//1014 1457//1018 1461//1022 1458//1037
f 1447//1010 1449//1034 1459//1019 1456//1017
f 1445//1009 1464//1033 1465//1023 1448//1036
f 1468//1025 1471//1032 1460//1020 1450//1035
f 1475//1038 1476//1039 1478//1040 1477//1041
f 1479//1042 1480//1043 1482//1044 1481//1045
f 1479//1042 1483//1046 1484//1047 1480//1043
f 1484//1047 1485//1048 1482//1044 1480//1043
f 1489//1049 1490//1050 1488//1051 1487//1052
f 1493//1053 1494//1054 1492//1055 1491//1056
f 1497//1057 1498//653 1496//1058 1495//1059
f 1491//1056 1492//1055 1485//1048 1484//1047
f 1495//1059 1496//1058 1490//1050 1489//1049
f 1481//1045 1482//1044 1487//1052 1486//1060
f 1485//1048 1489//1049 1487//1052 1482//1044
f 1494//1054 1497//1057 1495//1059 1492//1055
f 1476//1039 1479//1042 1481//1045 1478//1040
f 1492//1055 1495//1059 1489//1049 1485//1048
f 1501//1061 1502//1062 1500//1063 1499//1064
f 1505//1065 1506//653 1504//1066 1503//1067
f 1509//653 1510//1068 1508//653 1507//1069
f 1513//1070 1514//1071 1512//1072 1511//653
f 1507//1069 1508//653 1502//1062 1501//1061
f 1511//653 1512//1072 1506//653 1505//1065
f 1502//1062 1505//1065 1503//1067 1500//1063
f 1510//1068 1513//1070 1511//653 1508//653
f 1508//653 1511//653 1505//1065 1502//1062
f 1517//653 1518//1073 1516//653 1515//1074
f 1521//1075 1522//1076 1520//653 1519//653
f 1525//1077 1526//1078 1524//1079 1523//1080
f 1529//1081 1530//1082 1528//1083 1527//1084
f 1523//1080 1524//1079 1518//1073 1517//653
f 1527//1084 1528//1083 1522//1076 1521//1075
f 1518//1073 1521//1075 1519//653 1516//653
f 1526//1078 1529//1081 1527//1084 1524//1079
f 1524//1079 1527//1084 1521//1075 1518//1073
f 1499//1064 1500//1063 1470//1028 1469//1027
f 1503//1067 1504//1066 1474//1030 1473//1029
f 1500//1063 1503//1067 1473//1029 1470//1028
f 1515//1074 1516//653 1494//1054 1493//1053
f 1519//653 1520//653 1498//653 1497//1057
f 1516//653 1519//653 1497//1057 1494//1054
f 1453//1015 1454//1014 1476//1039 1475//1038
f 1461//1022 1462//1021 1484//1047 1483//1046
f 1461//1022 1483//1046 1479//1042 1458//1037
f 1474//1030 1493//1053 1491//1056 1472//1031
f 1454//1014 1458//1037 1479//1042 1476//1039
f 1472//1031 1491//1056 1484//1047 1462//1021
f 1506//653 1517//653 1515//1074 1504//1066
f 1514//1071 1525//1077 1523//1080 1512//1072
f 1512//1072 1523//1080 1517//653 1506//653
f 1504//1066 1515//1074 1493//1053 1474//1030
f 1533//1085 1534//1086 1532//1087 1531//1088
f 1537//653 1538//653 1536//653 1535//653
f 1541//653 1542//653 1540//1089 1539//1090
f 1545//1091 1546//1070 1544//653 1543//653
f 1539//1090 1540//1089 1534//1086 1533//1085
f 1543//653 1544//653 1538//653 1537//653
f 1534//1086 1537//653 1535//653 1532//1087
f 1542//653 1545//1091 1543//653 1540//1089
f 1540//1089 1543//653 1537//653 1534//1086
f 1549//653 1550//653 1548//653 1547//653
f 1553//1073 1554//1075 1552//653 1551//653
f 1557//1092 1558//1093 1556//1080 1555//1072
f 1561//1094 1562//1095 1560//1096 1559//1097
f 1555//1072 1556//1080 1550//653 1549//653
f 1559//1097 1560//1096 1554//1075 1553//1073
f 1550//653 1553//1073 1551//653 1548//653
f 1558//1093 1561//1094 1559//1097 1556//1080
f 1556//1080 1559//1097 1553//1073 1550//653
f 1565//1098 1566//1099 1564//1100 1563//1101
f 1569//1102 1570//1103 1568//1104 1567//1105
f 1576//1106 1577//1107 1575//1108 1574//1109
f 1575//1108 1577//1107 1573//1110 1572//1111
f 1580//1112 1581//1113 1579//1114 1578//1115
f 1584//1116 1585//1117 1583//1118 1582//1119
f 1583//1118 1587//1120 1586//1121 1582//1119
f 1586//1121 1588//1122 1584//1116 1582//1119
f 1572//1111 1573//1110 1566//1099 1565//1098
f 1583//1118 1585//1117 1570//1103 1569//1102
f 1566//1099 1569//1102 1567//1105 1564//1100
f 1586//1121 1587//1120 1577//1107 1576//1106
f 1577//1107 1587//1120 1583//1118 1573//1110
f 1581//1113 1588//1122 1586//1121 1579//1114
f 1579//1114 1586//1121 1576//1106 1571//1123
f 1573//1110 1583//1118 1569//1102 1566//1099
f 1591//1124 1593//1125 1590//1126 1589//1127
f 1596//1128 1597//1129 1595//1130 1594//1128
f 1603//1131 1604//1132 1602//1133 1601//1134
f 1600//1135 1604//1132 1603//1131 1599//1136
f 1602//1133 1604//1132 1600//1135 1598//1137
f 1607//1128 1608//1138 1606//1139 1605//1128
f 1606//1139 1610//1140 1609//1128 1605//1128
f 1613//1141 1614//1142 1612//1143 1611//1144
f 1593//1125 1614//1142 1613//1141 1592//1145
f 1612//1143 1614//1142 1593//1125 1591//1124
f 1595//1130 1617//1146 1616//1128 1594//1128
f 1616//1128 1617//1146 1608//1138 1607//1128
f 1601//1134 1602//1133 1593//1125 1592//1145
f 1593//1125 1602//1133 1598//1137 1590//1126
f 1597//1129 1603//1131 1601//1134 1595//1130
f 1608//1138 1613//1141 1611//1144 1606//1139
f 1611//1144 1615//1147 1610//1140 1606//1139
f 1617//1146 1618//1148 1613//1141 1608//1138
f 1601//1134 1618//1148 1617//1146 1595//1130
f 1613//1141 1618//1148 1601//1134 1592//1145
f 1563//1101 1564//1100 1542//653 1541//653
f 1567//1105 1568//1104 1546//1070 1545//1091
f 1564//1100 1567//1105 1545//1091 1542//653
f 1589//1127 1590//1126 1558//1093 1557//1092
f 1598//1137 1600//1135 1562//1095 1561//1094
f 1590//1126 1598//1137 1561//1094 1558//1093
f 1538//653 1549//653 1547//653 1536//653
f 1546//1070 1557//1092 1555//1072 1544//653
f 1544//653 1555//1072 1549//653 1538//653
f 1609//1128 1610//1140 1581//1113 1580//1112
f 1570//1103 1591//1124 1589//1127 1568//1104
f 1611//1144 1612//1143 1585//1117 1584//1116
f 1588//1122 1615//1147 1611//1144 1584//1116
f 1610//1140 1615//1147 1588//1122 1581//1113
f 1585//1117 1612//1143 1591//1124 1570//1103
f 1568//1104 1589//1127 1557//1092 1546//1070
f 1352//969 1477//1041 1478//1040 1353//970
f 1362//964 1486//1060 1487//1052 1363//965
f 1487//1052 1488//1051 1364//967 1363//965
f 1353//970 1478//1040 1481//1045 1354//971
f 1481//1045 1486//1060 1362//964 1354//971
f 1531//1088 1532//1087 1421//988 1420//987
f 1535//653 1536//653 1425//653 1424//653
f 1532//1087 1535//653 1424//653 1421//988
f 1547//653 1548//653 1439//1001 1438//1000
f 1551//653 1552//653 1443//1005 1442//1004
f 1548//653 1551//653 1442//1004 1439//1001
f 1536//653 1547//653 1438//1000 1425//653
f 1331//873 1367//891 1365//891 1328//873
f 1341//873 1375//891 1373//891 1338//873
f 1338//873 1373//891 1367//891 1331//873
f 1351//873 1412//891 1410//891 1348//873
f 1364//967 1420//987 1418//989 1361//968
f 1361//968 1418//989 1412//891 1351//873
f 1348//873 1410//891 1375//891 1341//873
f 1490//1050 1533//1085 1531//1088 1488//1051
f 1498//653 1541//653 1539//1090 1496//1058
f 1496//1058 1539//1090 1533//1085 1490//1050
f 1522//1076 1565//1098 1563//1101 1520//653
f 1530//1082 1575//1108 1572//1111 1528//1083
f 1528//1083 1572//1111 1565//1098 1522//1076
f 1520//653 1563//1101 1541//653 1498//653
f 1488//1051 1531//1088 1420//987 1364//967
f 1185//583 1322//583 1323//584 1186//584
f 1190//871 1326//871 1327//872 1191//872
f 1327//872 1328//873 1192//873 1191//872
f 1186//584 1323//584 1326//871 1190//871
f 1365//891 1366//879 1236//879 1235//891
f 1369//653 1370//653 1240//653 1239//653
f 1366//879 1369//653 1239//653 1236//879
f 1381//902 1382//903 1254//903 1253//902
f 1258//906 1386//972 1385//973 1257//907
f 1264//910 1390//910 1389//974 1263//911
f 1389//974 1391//975 1265//913 1263//911
f 1265//913 1391//975 1386//972 1258//906
f 1382//903 1390//910 1264//910 1254//903
f 1370//653 1381//902 1253//902 1240//653
f 1328//873 1365//891 1235//891 1192//873
f 911//646 964//697 962//700 909//647
f 919//652 973//653 971//653 917//653
f 917//653 971//653 964//697 911//646
f 1016//825 1017//916 954//685 953//684
f 939//671 1010//734 1008//737 937//672
f 1020//744 1021//743 961//693 960//692
f 961//693 1021//743 1018//746 958//689
f 1017//916 1020//744 960//692 954//685
f 958//689 1018//746 1010//734 939//671
f 937//672 1008//737 973//653 919//652
f 1275//917 1276//922 1464//1033 1463//917
f 1280//928 1281//929 1466//1024 1465//1023
f 1285//926 1469//1027 1466//1024 1281//929
f 1276//922 1280//928 1465//1023 1464//1033
f 1313//950 1501//1061 1499//1064 1311//951
f 1321//653 1509//653 1507//1069 1319//955
f 1319//955 1507//1069 1501//1061 1313//950
f 1311//951 1499//1064 1469//1027 1285//926
f 820//583 888//583 889//584 821//584
f 824//585 892//585 893//639 825//586
f 821//584 889//584 892//585 824//585
f 904//644 905//643 851//607 850//606
f 908//648 909//647 856//611 855//610
f 905//643 908//648 855//610 851//607
f 893//639 904//644 850//606 825//586
f 962//700 963//699 870//622 868//624
f 881//630 968//703 967//761 880//631
f 966//704 968//703 881//630 879//629
f 963//699 966//704 879//629 870//622
f 885//636 980//733 979//591 884//591
f 981//709 983//712 887//638 886//637
f 887//638 983//712 980//733 885//636
f 967//761 981//709 886//637 880//631
f 909//647 962//700 868//624 856//611
f 1620//1149 1621//1150 1623//1151 1622//1152
f 1626//1153 1627//23 1629//23 1628//1154
f 1625//23 1627//23 1626//1153 1624//1155
f 1632//1156 1633//23 1635//23 1634//1157
f 1636//1158 1637//1159 1640//1160 1639//1161
f 1641//1162 1642//1163 1644//1164 1643//1165
f 1641//1162 1643//1165 1646//1166 1645//1167
f 1623//1151 1638//1168 1637//1159 1622//1152
f 1620//1149 1622//1152 1637//1159 1636//1158
f 1630//1169 1631//1170 1644//1164 1642//1163
f 1635//23 1648//30 1647//1171 1634//1157
f 1637//1159 1638//1168 1642//1163 1641//1162
f 1637//1159 1641//1162 1645//1167 1640//1160
f 1628//1154 1629//23 1633//23 1632//1156
f 1621//1150 1626//1153 1628//1154 1623//1151
f 1624//1155 1626//1153 1621//1150 1619//1172
f 1630//1169 1632//1156 1634//1157 1631//1170
f 1623//1151 1628//1154 1632//1156 1630//1169
f 1634//1157 1647//1171 1644//1164 1631//1170
f 1623//1151 1630//1169 1642//1163 1638//1168
f 1652//1173 1653//1174 1655//1175 1654//1176
f 1650//1177 1653//1174 1652//1173 1649//1178
f 1650//1177 1651//1179 1655//1175 1653//1174
f 1656//1180 1657//30 1659//30 1658//1181
f 1659//30 1661//30 1660//1182 1658//1181
f 1665//1183 1666//23 1668//30 1667//1184
f 1654//1176 1655//1175 1663//1185 1662//1186
f 1660//1182 1661//30 1666//23 1665//1183
f 1650//1177 1656//1180 1658//1181 1651//1179
f 1658//1181 1660//1182 1655//1175 1651//1179
f 1663//1185 1665//1183 1667//1184 1664//1187
f 1655//1175 1660//1182 1665//1183 1663//1185
f 1643//1165 1644//1164 1650//1177 1649//1178
f 1643//1165 1649//1178 1652//1173 1646//1166
f 1647//1171 1648//30 1657//30 1656//1180
f 1644//1164 1647//1171 1656//1180 1650//1177
f 1669//1188 1670//1189 1672//228 1671//79
f 1673//1190 1674//1191 1676//1192 1675//1193
f 1677//1194 1678//79 1680//1195 1679//1196
f 1681//79 1682//1197 1684//79 1683//1198
f 1671//79 1672//228 1678//79 1677//1194
f 1675//1193 1676//1192 1682//1197 1681//79
f 1670//1189 1673//1190 1675//1193 1672//228
f 1678//79 1681//79 1683//1198 1680//1195
f 1672//228 1675//1193 1681//79 1678//79
f 1685//1199 1686//1200 1688//1201 1687//1202
f 1689//1203 1690//1204 1692//1205 1691//1206
f 1689//1203 1691//1206 1694//1207 1693//1208
f 1697//1209 1698//1210 1700//79 1699//79
f 1701//1211 1702//1212 1704//1213 1703//1214
f 1687//1202 1688//1201 1698//1210 1697//1209
f 1693//1208 1694//1207 1702//1212 1701//1211
f 1686//1200 1689//1203 1693//1208 1688//1201
f 1698//1210 1701//1211 1703//1214 1700//79
f 1688//1201 1693//1208 1701//1211 1698//1210
f 1705//1215 1706//1216 1708//1217 1707//1218
f 1709//1219 1710//1220 1712//1221 1711//1222
f 1715//1223 1716//1224 1714//1225 1713//1226
f 1714//1225 1716//1224 1718//1227 1717//1228
f 1723//1229 1724//1230 1722//1230 1721//1231
f 1719//1232 1721//1231 1722//1230 1720//1233
f 1730//1234 1731//1235 1729//1236 1728//1237
f 1725//1238 1728//1237 1729//1236 1726//1239
f 1725//1238 1727//1240 1730//1234 1728//1237
f 1734//1241 1735//1230 1733//1230 1732//1242
f 1707//1218 1708//1217 1715//1223 1713//1226
f 1711//1222 1712//1221 1727//1240 1725//1238
f 1706//1216 1709//1219 1711//1222 1708//1217
f 1725//1238 1726//1239 1716//1224 1715//1223
f 1716//1224 1726//1239 1729//1236 1718//1227
f 1732//1242 1733//1230 1724//1230 1723//1229
f 1718//1227 1723//1229 1721//1231 1717//1228
f 1714//1225 1717//1228 1721//1231 1719//1232
f 1731//1235 1734//1241 1732//1242 1729//1236
f 1729//1236 1732//1242 1723//1229 1718//1227
f 1708//1217 1711//1222 1725//1238 1715//1223
f 1736//1243 1737//79 1739//1244 1738//1245
f 1740//79 1741//79 1743//1246 1742//1247
f 1744//1248 1745//1249 1748//1250 1746//1251
f 1749//1252 1750//1253 1752//1254 1751//1255
f 1738//1245 1739//1244 1745//1249 1744//1248
f 1742//1247 1743//1246 1750//1253 1749//1252
f 1737//79 1740//79 1742//1247 1739//1244
f 1745//1249 1749//1252 1751//1255 1748//1250
f 1739//1244 1742//1247 1749//1252 1745//1249
f 1679//1196 1680//1195 1706//1216 1705//1215
f 1683//1198 1684//79 1710//1220 1709//1219
f 1680//1195 1683//1198 1709//1219 1706//1216
f 1699//79 1700//79 1737//79 1736//1243
f 1703//1214 1704//1213 1741//79 1740//79
f 1700//79 1703//1214 1740//79 1737//79
f 1674//1191 1685//1199 1687//1202 1676//1192
f 1682//1197 1697//1209 1699//79 1684//79
f 1676//1192 1687//1202 1697//1209 1682//1197
f 1710//1220 1736//1243 1738//1245 1712//1221
f 1746//1251 1747//1256 1731//1235 1730//1234
f 1727//1240 1744//1248 1746//1251 1730//1234
f 1712//1221 1738//1245 1744//1248 1727//1240
f 1684//79 1699//79 1736//1243 1710//1220
f 1756//1257 1757//1258 1759//1259 1758//1260
f 1754//1261 1757//1258 1756//1257 1753//1262
f 1754//1261 1755//1263 1759//1259 1757//1258
f 1760//1264 1761//30 1763//30 1762//1265
f 1765//1266 1766//1267 1768//1268 1767//1269
f 1771//1270 1772//23 1774//23 1773//1271
f 1770//30 1772//23 1771//1270 1769//1272
f 1775//1273 1776//1274 1778//1275 1777//1276
f 1779//1277 1780//1278 1783//1279 1782//1280
f 1756//1257 1758//1260 1776//1274 1775//1273
f 1768//1268 1781//1281 1780//1278 1767//1269
f 1765//1266 1767//1269 1780//1278 1779//1277
f 1758//1260 1759//1259 1766//1267 1765//1266
f 1755//1263 1764//1282 1766//1267 1759//1259
f 1776//1274 1779//1277 1782//1280 1778//1275
f 1762//1265 1763//30 1770//30 1769//1272
f 1754//1261 1760//1264 1762//1265 1755//1263
f 1766//1267 1771//1270 1773//1271 1768//1268
f 1769//1272 1771//1270 1766//1267 1764//1282
f 1755//1263 1762//1265 1769//1272 1764//1282
f 1758//1260 1765//1266 1779//1277 1776//1274
f 1787//1283 1788//1284 1790//1285 1789//1286
f 1790//1285 1793//1287 1792//1288 1789//1286
f 1787//1283 1789//1286 1792//1288 1791//1289
f 1794//1290 1795//23 1797//23 1796//1291
f 1799//1292 1800//1293 1802//1294 1801//1295
f 1805//1296 1806//30 1808//30 1807//1297
f 1804//23 1806//30 1805//1296 1803//1298
f 1786//23 1795//23 1794//1290 1785//1299
f 1792//1288 1793//1287 1800//1293 1799//1292
f 1790//1285 1798//1300 1800//1293 1793//1287
f 1796//1291 1797//23 1804//23 1803//1298
f 1788//1284 1794//1290 1796//1291 1790//1285
f 1800//1293 1805//1296 1807//1297 1802//1294
f 1803//1298 1805//1296 1800//1293 1798//1300
f 1790//1285 1796//1291 1803//1298 1798//1300
f 1785//1299 1794//1290 1788//1284 1784//1301
f 1809//1302 1810//1303 1812//79 1811//79
f 1813//1304 1814//1305 1816//1306 1815//1197
f 1817//1307 1818//1308 1820//1309 1819//1310
f 1821//79 1822//79 1824//79 1823//1311
f 1811//79 1812//79 1818//1308 1817//1307
f 1815//1197 1816//1306 1822//79 1821//79
f 1810//1303 1813//1304 1815//1197 1812//79
f 1818//1308 1821//79 1823//1311 1820//1309
f 1812//79 1815//1197 1821//79 1818//1308
f 1825//1312 1826//1313 1828//1314 1827//1315
f 1829//1316 1830//1317 1833//1318 1832//1319
f 1834//79 1835//1214 1837//79 1836//79
f 1838//1320 1839//1321 1841//1302 1840//79
f 1827//1315 1828//1314 1835//1214 1834//79
f 1832//1319 1833//1318 1839//1321 1838//1320
f 1826//1313 1829//1316 1832//1319 1828//1314
f 1835//1214 1838//1320 1840//79 1837//79
f 1828//1314 1832//1319 1838//1320 1835//1214
f 1777//1276 1778//1275 1810//1303 1809//1302
f 1782//1280 1783//1279 1814//1305 1813//1304
f 1778//1275 1782//1280 1813//1304 1810//1303
f 1791//1289 1792//1288 1826//1313 1825//1312
f 1802//1294 1831//1322 1830//1317 1801//1295
f 1799//1292 1801//1295 1830//1317 1829//1316
f 1792//1288 1799//1292 1829//1316 1826//1313
f 1780//1278 1781//1281 1788//1284 1787//1283
f 1780//1278 1787//1283 1791//1289 1783//1279
f 1773//1271 1774//23 1786//23 1785//1299
f 1768//1268 1773//1271 1785//1299 1784//1301
f 1768//1268 1784//1301 1788//1284 1781//1281
f 1814//1305 1825//1312 1827//1315 1816//1306
f 1822//79 1834//79 1836//79 1824//79
f 1816//1306 1827//1315 1834//79 1822//79
f 1783//1279 1791//1289 1825//1312 1814//1305
f 1639//1161 1640//1160 1670//1189 1669//1188
f 1645//1167 1646//1166 1674//1191 1673//1190
f 1640//1160 1645//1167 1673//1190 1670//1189
f 1652//1173 1654//1176 1686//1200 1685//1199
f 1663//1185 1690//1204 1689//1203 1662//1186
f 1663//1185 1664//1187 1692//1205 1690//1204
f 1668//30 1696//30 1695//1323 1667//1184
f 1667//1184 1695//1323 1692//1205 1664//1187
f 1654//1176 1662//1186 1689//1203 1686//1200
f 1646//1166 1652//1173 1685//1199 1674//1191
f 1691//1206 1692//1205 1754//1261 1753//1262
f 1691//1206 1753//1262 1756//1257 1694//1207
f 1702//1212 1775//1273 1777//1276 1704//1213
f 1695//1323 1696//30 1761//30 1760//1264
f 1692//1205 1695//1323 1760//1264 1754//1261
f 1694//1207 1756//1257 1775//1273 1702//1212
f 1741//79 1809//1302 1811//79 1743//1246
f 1750//1253 1817//1307 1819//1310 1752//1254
f 1743//1246 1811//79 1817//1307 1750//1253
f 1704//1213 1777//1276 1809//1302 1741//79
f 1844//1324 1845//23 1847//23 1846//1325
f 1842//1326 1844//1324 1846//1325 1843//1327
f 1848//1328 1849//1329 1851//1330 1850//1331
f 1848//1328 1850//1331 1853//1332 1852//1333
f 1859//1334 1860//1335 1862//1336 1861//1337
f 1857//1338 1860//1335 1859//1334 1856//1339
f 1857//1338 1858//1340 1862//1336 1860//1335
f 1863//1341 1864//30 1866//30 1865//1342
f 1866//30 1868//1343 1867//1344 1865//1342
f 1869//1345 1870//1346 1872//1347 1871//1348
f 1873//1349 1874//1350 1876//1351 1875//1352
f 1852//1333 1853//1332 1870//1346 1869//1345
f 1859//1334 1861//1337 1874//1350 1873//1349
f 1850//1331 1851//1330 1857//1338 1856//1339
f 1850//1331 1856//1339 1859//1334 1853//1332
f 1870//1346 1873//1349 1875//1352 1872//1347
f 1854//1353 1855//30 1864//30 1863//1341
f 1857//1338 1863//1341 1865//1342 1858//1340
f 1865//1342 1867//1344 1862//1336 1858//1340
f 1851//1330 1854//1353 1863//1341 1857//1338
f 1853//1332 1859//1334 1873//1349 1870//1346
f 1882//1354 1884//1355 1883//1356 1881//1357
f 1886//1358 1888//401 1887//1359 1885//1360
f 1878//1361 1882//1354 1881//1357 1877//1362
f 1880//1363 1886//1358 1885//1360 1879//1364
f 1885//1360 1887//1359 1884//1355 1882//1354
f 1879//1364 1885//1360 1882//1354 1878//1361
f 1842//1326 1843//1327 1851//1330 1849//1329
f 1847//23 1855//30 1854//1353 1846//1325
f 1846//1325 1854//1353 1851//1330 1843//1327
f 1861//1337 1862//1336 1878//1361 1877//1362
f 1874//1350 1881//1357 1883//1356 1876//1351
f 1867//1344 1868//1343 1880//1363 1879//1364
f 1862//1336 1867//1344 1879//1364 1878//1361
f 1861//1337 1877//1362 1881//1357 1874//1350
f 1895//1365 1896//1366 1898//1366 1897//1367
f 1902//1368 1903//1369 1905//1370 1904//1371
f 1900//1372 1904//1371 1905//1370 1901//1373
f 1899//1374 1901//1373 1905//1370 1903//1369
f 1906//1375 1907//1376 1909//1366 1908//1377
f 1906//1375 1910//1378 1911//1379 1907//1376
f 1912//1380 1913//1381 1915//1382 1914//1383
f 1912//1380 1914//1383 1917//1384 1916//1385
f 1891//1386 1914//1383 1915//1382 1892//1387
f 1890//1388 1892//1387 1915//1382 1913//1381
f 1895//1365 1918//1389 1919//1366 1896//1366
f 1900//1372 1901//1373 1913//1381 1912//1380
f 1900//1372 1912//1380 1916//1385 1904//1371
f 1908//1377 1909//1366 1919//1366 1918//1389
f 1890//1388 1895//1365 1897//1367 1892//1387
f 1899//1374 1906//1375 1908//1377 1901//1373
f 1899//1374 1903//1369 1910//1378 1906//1375
f 1901//1373 1908//1377 1918//1389 1913//1381
f 1890//1388 1913//1381 1918//1389 1895//1365
f 1922//1390 1923//1391 1921//1392 1920//1393
f 1924//1394 1925//1395 1927//1396 1926//1397
f 1922//1390 1926//1397 1927//1396 1923//1391
f 1921//1392 1923//1391 1927//1396 1925//1395
f 1928//1398 1930//1399 1931//1400 1929//1401
f 1932//1402 1933//1403 1935//1404 1934//1405
f 1936//1406 1937//1407 1939//1408 1938//1409
f 1940//1410 1941//1411 1943//1412 1942//1413
f 1924//1394 1926//1397 1937//1407 1936//1406
f 1934//1405 1935//1404 1941//1411 1940//1410
f 1922//1390 1932//1402 1934//1405 1926//1397
f 1937//1407 1940//1410 1942//1413 1939//1408
f 1921//1392 1925//1395 1930//1399 1928//1398
f 1926//1397 1934//1405 1940//1410 1937//1407
f 1944//1414 1945//1415 1947//1416 1946//1417
f 1948//1418 1949//1419 1951//1420 1950//1421
f 1952//1422 1953//1423 1955//79 1954//79
f 1956//79 1957//79 1959//517 1958//79
f 1946//1417 1947//1416 1953//1423 1952//1422
f 1950//1421 1951//1420 1957//79 1956//79
f 1945//1415 1948//1418 1950//1421 1947//1416
f 1953//1423 1956//79 1958//79 1955//79
f 1947//1416 1950//1421 1956//79 1953//1423
f 1960//1424 1961//1425 1963//79 1962//1426
f 1964//493 1965//79 1967//500 1966//79
f 1968//79 1969//496 1971//1427 1970//1428
f 1972//1429 1973//520 1975//1430 1974//1431
f 1962//1426 1963//79 1969//496 1968//79
f 1966//79 1967//500 1973//520 1972//1429
f 1961//1425 1964//493 1966//79 1963//79
f 1969//496 1972//1429 1974//1431 1971//1427
f 1963//79 1966//79 1972//1429 1969//496
f 1902//1368 1904//1371 1945//1415 1944//1414
f 1916//1385 1917//1384 1949//1419 1948//1418
f 1904//1371 1916//1385 1948//1418 1945//1415
f 1938//1409 1939//1408 1961//1425 1960//1424
f 1942//1413 1943//1412 1965//79 1964//493
f 1939//1408 1942//1413 1964//493 1961//1425
f 1891//1386 1892//1387 1925//1395 1924//1394
f 1914//1383 1936//1406 1938//1409 1917//1384
f 1928//1398 1929//1401 1894//1432 1893//1433
f 1897//1367 1898//1366 1931//1400 1930//1399
f 1921//1392 1928//1398 1893//1433 1889//1434
f 1892//1387 1897//1367 1930//1399 1925//1395
f 1891//1386 1924//1394 1936//1406 1914//1383
f 1949//1419 1960//1424 1962//1426 1951//1420
f 1957//79 1968//79 1970//1428 1959//517
f 1951//1420 1962//1426 1968//79 1957//79
f 1917//1384 1938//1409 1960//1424 1949//1419
f 1976//1435 1977//1436 1979//1437 1978//1438
f 1980//1439 1981//79 1983//79 1982//1440
f 1984//1441 1985//1442 1987//79 1986//433
f 1988//1423 1989//79 1991//79 1990//79
f 1978//1438 1979//1437 1985//1442 1984//1441
f 1982//1440 1983//79 1989//79 1988//1423
f 1977//1436 1980//1439 1982//1440 1979//1437
f 1985//1442 1988//1423 1990//79 1987//79
f 1979//1437 1982//1440 1988//1423 1985//1442
f 1992//79 1993//79 1995//79 1994//79
f 1996//79 1997//79 1999//79 1998//79
f 2000//79 2001//79 2003//1428 2002//517
f 2004//496 2005//1429 2007//1443 2006//1444
f 1994//79 1995//79 2001//79 2000//79
f 1998//79 1999//79 2005//1429 2004//496
f 1993//79 1996//79 1998//79 1995//79
f 2001//79 2004//496 2006//1444 2003//1428
f 1995//79 1998//79 2004//496 2001//79
f 2008//79 2009//79 2011//1445 2010//502
f 2012//524 2013//525 2015//1446 2014//1447
f 2016//1448 2017//1449 2019//1450 2018//1451
f 2024//1452 2025//1453 2023//1454 2022//1455
f 2020//1456 2021//1457 2024//1452 2022//1455
f 2010//502 2011//1445 2017//1449 2016//1448
f 2014//1447 2015//1446 2021//1457 2020//1456
f 2009//79 2012//524 2014//1447 2011//1445
f 2017//1449 2020//1456 2022//1455 2019//1450
f 2011//1445 2014//1447 2020//1456 2017//1449
f 2027//1458 2028//1459 2030//1460 2029//1461
f 2031//1462 2032//1463 2034//1464 2033//1465
f 2038//1466 2039//1467 2037//1468 2036//1469
f 2037//1468 2041//1470 2040//1471 2036//1469
f 2037//1468 2039//1467 2042//1472 2041//1470
f 2045//1473 2046//1474 2044//1475 2043//1476
f 2049//1477 2050//1478 2048//1479 2047//1480
f 2054//1481 2055//562 2053//562 2052//1482
f 2053//562 2057//562 2056//1483 2052//1482
f 2029//1461 2030//1460 2038//1466 2036//1469
f 2035//1484 2050//1478 2049//1477 2034//1464
f 2033//1465 2034//1464 2049//1477 2047//1480
f 2028//1459 2031//1462 2033//1465 2030//1460
f 2047//1480 2048//1479 2039//1467 2038//1466
f 2039//1467 2048//1479 2051//1485 2042//1472
f 2056//1483 2057//562 2046//1474 2045//1473
f 2042//1472 2045//1473 2043//1476 2041//1470
f 2050//1478 2054//1481 2052//1482 2048//1479
f 2052//1482 2056//1483 2051//1485 2048//1479
f 2051//1485 2056//1483 2045//1473 2042//1472
f 2030//1460 2033//1465 2047//1480 2038//1466
f 1986//433 1987//79 2009//79 2008//79
f 1990//79 1991//79 2013//525 2012//524
f 1987//79 1990//79 2012//524 2009//79
f 2002//517 2003//1428 2028//1459 2027//1458
f 2006//1444 2007//1443 2032//1463 2031//1462
f 2003//1428 2006//1444 2031//1462 2028//1459
f 1981//79 1992//79 1994//79 1983//79
f 1989//79 2000//79 2002//517 1991//79
f 1983//79 1994//79 2000//79 1989//79
f 2013//525 2027//1458 2029//1461 2015//1446
f 2040//1471 2041//1470 2025//1453 2024//1452
f 2021//1457 2036//1469 2040//1471 2024//1452
f 2041//1470 2043//1476 2026//1486 2025//1453
f 2015//1446 2029//1461 2036//1469 2021//1457
f 1991//79 2002//517 2027//1458 2013//525
f 2058//79 2059//524 2061//1487 2060//1488
f 2062//525 2063//1489 2065//1490 2064//1491
f 2066//1492 2067//1493 2069//1494 2068//1495
f 2076//1496 2077//1497 2075//1498 2074//1499
f 2073//1500 2077//1497 2076//1496 2072//1501
f 2071//1502 2072//1501 2076//1496 2074//1499
f 2060//1488 2061//1487 2067//1493 2066//1492
f 2064//1491 2065//1490 2072//1501 2071//1502
f 2059//524 2062//525 2064//1491 2061//1487
f 2074//1499 2075//1498 2070//1503 2069//1494
f 2067//1493 2071//1502 2074//1499 2069//1494
f 2077//1497 2079//1504 2078//1505 2075//1498
f 2061//1487 2064//1491 2071//1502 2067//1493
f 2081//1506 2082//1507 2084//1508 2083//1509
f 2089//1510 2090//1511 2088//1512 2087//1513
f 2085//1514 2086//1515 2089//1510 2087//1513
f 2095//1516 2096//1517 2094//1518 2093//1519
f 2094//1518 2096//1517 2098//1520 2097//1521
f 2103//1522 2104//562 2102//546 2101//1523
f 2100//562 2104//562 2103//1522 2099//1482
f 2110//1524 2111//562 2109//562 2108//1525
f 2083//1509 2084//1508 2095//1516 2093//1519
f 2088//1512 2106//1526 2105//1527 2087//1513
f 2088//1512 2090//1511 2107//1528 2106//1526
f 2092//562 2111//562 2110//1524 2091//1529
f 2082//1507 2085//1514 2087//1513 2084//1508
f 2105//1527 2106//1526 2096//1517 2095//1516
f 2108//1525 2109//562 2100//562 2099//1482
f 2098//1520 2103//1522 2101//1523 2097//1521
f 2099//1482 2103//1522 2098//1520 2096//1517
f 2107//1528 2110//1524 2108//1525 2106//1526
f 2106//1526 2108//1525 2099//1482 2096//1517
f 2091//1529 2110//1524 2107//1528 2090//1511
f 2084//1508 2087//1513 2105//1527 2095//1516
f 2114//1530 2115//1531 2113//1532 2112//1533
f 2119//1534 2120//1535 2118//562 2117//1536
f 2118//562 2122//562 2121//1537 2117//1536
f 2126//1538 2127//1539 2125//1540 2124//1541
f 2124//1541 2125//1540 2120//1535 2119//1534
f 2115//1531 2119//1534 2117//1536 2113//1532
f 2117//1536 2121//1537 2116//1542 2113//1532
f 2123//1543 2124//1541 2119//1534 2115//1531
f 2070//1503 2115//1531 2114//1530 2069//1494
f 2068//1495 2069//1494 2114//1530 2112//1533
f 2080//1544 2127//1539 2126//1538 2079//1504
f 2078//1505 2079//1504 2126//1538 2124//1541
f 2078//1505 2124//1541 2123//1543 2075//1498
f 2070//1503 2075//1498 2123//1543 2115//1531
f 2063//1489 2081//1506 2083//1509 2065//1490
f 2093//1519 2094//1518 2073//1500 2072//1501
f 2073//1500 2094//1518 2097//1521 2077//1497
f 2101//1523 2102//546 2080//1544 2079//1504
f 2097//1521 2101//1523 2079//1504 2077//1497
f 2065//1490 2083//1509 2093//1519 2072//1501
f 2130//1545 2131//1546 2129//1547 2128//1548
f 2129//1547 2133//1549 2132//1550 2128//1548
f 2129//1547 2131//1546 2134//1551 2133//1549
f 2139//1552 2140//562 2138//562 2137//1553
f 2136//562 2140//562 2139//1552 2135//1554
f 2146//1555 2147//1556 2145//1557 2144//1558
f 2141//1559 2142//1560 2131//1546 2130//1545
f 2144//1558 2145//1557 2136//562 2135//1554
f 2134//1551 2139//1552 2137//1553 2133//1549
f 2135//1554 2139//1552 2134//1551 2131//1546
f 2143//1561 2146//1555 2144//1558 2142//1560
f 2142//1560 2144//1558 2135//1554 2131//1546
f 2148//1562 2149//1563 2147//1556 2146//1555
f 1954//79 1955//79 2059//524 2058//79
f 1958//79 1959//517 2063//1489 2062//525
f 1955//79 1958//79 2062//525 2059//524
f 1970//1428 1971//1427 2082//1507 2081//1506
f 1974//1431 1975//1430 2086//1515 2085//1514
f 1971//1427 1974//1431 2085//1514 2082//1507
f 1959//517 1970//1428 2081//1506 2063//1489
f 2018//1451 2019//1450 2130//1545 2128//1548
f 2023//1454 2142//1560 2141//1559 2022//1455
f 2023//1454 2025//1453 2143//1561 2142//1560
f 2026//1486 2146//1555 2143//1561 2025//1453
f 2019//1450 2022//1455 2141//1559 2130//1545
f 2044//1475 2149//1563 2148//1562 2043//1476
f 2026//1486 2043//1476 2148//1562 2146//1555
f 1933//1403 1976//1435 1978//1438 1935//1404
f 1941//1411 1984//1441 1986//433 1943//1412
f 1935//1404 1978//1438 1984//1441 1941//1411
f 1965//79 2008//79 2010//502 1967//500
f 1973//520 2016//1448 2018//1451 1975//1430
f 1967//500 2010//502 2016//1448 1973//520
f 1943//1412 1986//433 2008//79 1965//79
f 2132//1550 2133//1549 2090//1511 2089//1510
f 2086//1515 2128//1548 2132//1550 2089//1510
f 2137//1553 2138//562 2092//562 2091//1529
f 2133//1549 2137//1553 2091//1529 2090//1511
f 1975//1430 2018//1451 2128//1548 2086//1515
f 2150//79 2151//1564 2153//1565 2152//500
f 2154//1566 2155//1567 2157//1568 2156//1569
f 2158//1570 2159//1571 2161//1572 2160//1573
f 2162//1574 2163//1575 2165//1576 2164//1577
f 2152//500 2153//1565 2159//1571 2158//1570
f 2156//1569 2157//1568 2163//1575 2162//1574
f 2151//1564 2154//1566 2156//1569 2153//1565
f 2159//1571 2162//1574 2164//1577 2161//1572
f 2153//1565 2156//1569 2162//1574 2159//1571
f 2168//1578 2170//1578 2169//1579 2167//1580
f 2172//401 2174//401 2173//1359 2171//1359
f 2176//1581 2178//1582 2177//1583 2175//1584
f 2180//401 2182//1585 2181//1586 2179//1587
f 2170//1578 2176//1581 2175//1584 2169//1579
f 2174//401 2180//401 2179//1587 2173//1359
f 2171//1359 2173//1359 2170//1578 2168//1578
f 2179//1587 2181//1586 2178//1582 2176//1581
f 2173//1359 2179//1587 2176//1581 2170//1578
f 2188//1588 2189//1589 2187//1590 2186//1591
f 2185//1592 2189//1589 2188//1588 2184//1593
f 2183//1594 2184//1593 2188//1588 2186//1591
f 2192//1595 2193//562 2191//562 2190//1596
f 2196//1597 2197//1598 2195//1599 2194//1600
f 2201//1601 2202//1602 2200//562 2199//1603
f 2200//562 2204//562 2203//1604 2199//1603
f 2191//562 2207//562 2206//1605 2190//1596
f 2194//1600 2195//1599 2185//1592 2184//1593
f 2185//1592 2195//1599 2198//1606 2189//1589
f 2203//1604 2204//562 2193//562 2192//1595
f 2189//1589 2192//1595 2190//1596 2187//1590
f 2197//1598 2201//1601 2199//1603 2195//1599
f 2199//1603 2203//1604 2198//1606 2195//1599
f 2198//1606 2203//1604 2192//1595 2189//1589
f 2190//1596 2206//1605 2205//1607 2187//1590
f 2160//1573 2161//1572 2184//1593 2183//1594
f 2166//1608 2197//1598 2196//1597 2165//1576
f 2164//1577 2165//1576 2196//1597 2194//1600
f 2161//1572 2164//1577 2194//1600 2184//1593
f 2182//1585 2210//1609 2209//1610 2181//1586
f 2181//1586 2209//1610 2208//1611 2178//1582
f 2155//1567 2167//1580 2169//1579 2157//1568
f 2177//1583 2178//1582 2166//1608 2165//1576
f 2163//1575 2175//1584 2177//1583 2165//1576
f 2157//1568 2169//1579 2175//1584 2163//1575
f 2209//1610 2210//1609 2202//1602 2201//1601
f 2208//1611 2209//1610 2201//1601 2197//1598
f 2166//1608 2178//1582 2208//1611 2197//1598
f 1734//1241 1893//1433 1894//1432 1735//1230
f 1731//1235 1889//1434 1893//1433 1734//1241
f 1746//1251 1920//1393 1921//1392 1747//1256
f 1746//1251 1748//1250 1922//1390 1920//1393
f 1751//1255 1752//1254 1933//1403 1932//1402
f 1748//1250 1751//1255 1932//1402 1922//1390
f 1731//1235 1747//1256 1921//1392 1889//1434
f 1819//1310 1820//1309 1977//1436 1976//1435
f 1823//1311 1824//79 1981//79 1980//1439
f 1820//1309 1823//1311 1980//1439 1977//1436
f 1836//79 1837//79 1993//79 1992//79
f 1840//79 1841//1302 1997//79 1996//79
f 1837//79 1840//79 1996//79 1993//79
f 1824//79 1836//79 1992//79 1981//79
f 1752//1254 1819//1310 1976//1435 1933//1403
f 1871//1348 1872//1347 2151//1564 2150//79
f 1875//1352 1876//1351 2155//1567 2154//1566
f 1872//1347 1875//1352 2154//1566 2151//1564
f 1884//1355 2168//1578 2167//1580 1883//1356
f 1888//401 2172//401 2171//1359 1887//1359
f 1887//1359 2171//1359 2168//1578 1884//1355
f 1876//1351 1883//1356 2167//1580 2155//1567
f 1807//1297 1808//30 1845//23 1844//1324
f 1802//1294 1807//1297 1844//1324 1842//1326
f 1830//1317 1831//1322 1849//1329 1848//1328
f 1830//1317 1848//1328 1852//1333 1833//1318
f 1839//1321 1869//1345 1871//1348 1841//1302
f 1833//1318 1852//1333 1869//1345 1839//1321
f 1802//1294 1842//1326 1849//1329 1831//1322
f 1997//79 2150//79 2152//500 1999//79
f 2005//1429 2158//1570 2160//1573 2007//1443
f 1999//79 2152//500 2158//1570 2005//1429
f 2186//1591 2187//1590 2035//1484 2034//1464
f 2032//1463 2183//1594 2186//1591 2034//1464
f 2206//1605 2207//562 2055//562 2054//1481
f 2205//1607 2206//1605 2054//1481 2050//1478
f 2035//1484 2187//1590 2205//1607 2050//1478
f 2007//1443 2160//1573 2183//1594 2032//1463
f 1841//1302 1871//1348 2150//79 1997//79
f 2213//591 2214//1612 2216//1613 2215//591
f 2212//1614 2214//1612 2213//591 2211//591
f 2218//1615 2219//1616 2221//1617 2220//1618
f 2222//591 2223//1619 2225//1620 2224//591
f 2231//1621 2232//1622 2230//1623 2228//1624
f 2235//1625 2236//1626 2238//1627 2237//1628
f 2239//1629 2240//1630 2238//1627 2236//1626
f 2221//1617 2230//1623 2229//1631 2220//1618
f 2228//1624 2230//1623 2221//1617 2219//1616
f 2225//1620 2234//1632 2233//591 2224//591
f 2235//1625 2237//1628 2227//1633 2226//1634
f 2215//591 2216//1613 2223//1619 2222//591
f 2229//1631 2230//1623 2236//1626 2235//1625
f 2232//1622 2239//1629 2236//1626 2230//1623
f 2214//1612 2218//1615 2220//1618 2216//1613
f 2217//1635 2218//1615 2214//1612 2212//1614
f 2223//1619 2226//1634 2227//1633 2225//1620
f 2216//1613 2220//1618 2226//1634 2223//1619
f 2227//1633 2237//1628 2234//1632 2225//1620
f 2229//1631 2235//1625 2226//1634 2220//1618
f 2241//591 2242//1636 2244//1637 2243//591
f 2244//1637 2246//1638 2245//591 2243//591
f 2250//1639 2251//1640 2253//1641 2252//1642
f 2248//1643 2251//1640 2250//1639 2247//1644
f 2250//1639 2252//1642 2249//1645 2247//1644
f 2254//591 2255//1646 2257//1647 2256//591
f 2245//591 2246//1638 2255//1646 2254//591
f 2252//1642 2253//1641 2259//1648 2258//1649
f 2242//1636 2247//1644 2249//1645 2244//1637
f 2249//1645 2252//1642 2246//1638 2244//1637
f 2255//1646 2258//1649 2260//1650 2257//1647
f 2246//1638 2252//1642 2258//1649 2255//1646
f 2233//591 2234//1632 2242//1636 2241//591
f 2237//1628 2238//1627 2248//1643 2247//1644
f 2240//1630 2251//1640 2248//1643 2238//1627
f 2234//1632 2237//1628 2247//1644 2242//1636
f 2263//653 2264//802 2262//1651 2261//1652
f 2267//1653 2268//1654 2266//1655 2265//1656
f 2271//1657 2272//1658 2270//653 2269//1659
f 2275//1660 2276//653 2274//1661 2273//653
f 2269//1659 2270//653 2264//802 2263//653
f 2273//653 2274//1661 2268//1654 2267//1653
f 2264//802 2267//1653 2265//1656 2262//1651
f 2272//1658 2275//1660 2273//653 2270//653
f 2270//653 2273//653 2267//1653 2264//802
f 2279//1662 2280//1663 2278//1664 2277//1665
f 2283//1666 2284//1667 2286//1668 2285//1669
f 2287//1670 2288//1671 2286//1668 2284//1667
f 2291//653 2292//653 2290//1672 2289//1673
f 2295//1674 2296//1675 2294//1676 2293//1677
f 2289//1673 2290//1672 2280//1663 2279//1662
f 2293//1677 2294//1676 2288//1671 2287//1670
f 2280//1663 2287//1670 2284//1667 2278//1664
f 2292//653 2295//1674 2293//1677 2290//1672
f 2290//1672 2293//1677 2287//1670 2280//1663
f 2299//1678 2300//1679 2298//1680 2297//1681
f 2303//1682 2304//1683 2302//1684 2301//1685
f 2309//1686 2310//1687 2308//1688 2307//1686
f 2305//1689 2307//1686 2308//1688 2306//1690
f 2313//1691 2314//1692 2312//1693 2311//1694
f 2315//1695 2316//1696 2313//1691 2311//1694
f 2319//1686 2320//1697 2318//1698 2317//1686
f 2326//1699 2327//1700 2325//1701 2324//1702
f 2321//1703 2324//1702 2325//1701 2322//1704
f 2325//1701 2327//1700 2323//1705 2322//1704
f 2312//1693 2314//1692 2300//1679 2299//1678
f 2322//1704 2323//1705 2304//1683 2303//1682
f 2317//1686 2318//1698 2310//1687 2309//1686
f 2300//1679 2303//1682 2301//1685 2298//1680
f 2321//1703 2322//1704 2314//1692 2313//1691
f 2316//1696 2324//1702 2321//1703 2313//1691
f 2310//1687 2316//1696 2315//1695 2308//1688
f 2306//1690 2308//1688 2315//1695 2311//1694
f 2320//1697 2326//1699 2324//1702 2318//1698
f 2318//1698 2324//1702 2316//1696 2310//1687
f 2314//1692 2322//1704 2303//1682 2300//1679
f 2330//1706 2331//1707 2329//653 2328//1708
f 2334//1709 2335//1710 2333//653 2332//653
f 2339//1711 2340//1712 2337//1713 2336//1714
f 2343//1715 2344//1716 2342//1717 2341//1718
f 2336//1714 2337//1713 2331//1707 2330//1706
f 2341//1718 2342//1717 2335//1710 2334//1709
f 2331//1707 2334//1709 2332//653 2329//653
f 2340//1712 2343//1715 2341//1718 2337//1713
f 2337//1713 2341//1718 2334//1709 2331//1707
f 2297//1681 2298//1680 2272//1658 2271//1657
f 2301//1685 2302//1684 2276//653 2275//1660
f 2298//1680 2301//1685 2275//1660 2272//1658
f 2328//1708 2329//653 2292//653 2291//653
f 2332//653 2333//653 2296//1675 2295//1674
f 2329//653 2332//653 2295//1674 2292//653
f 2268//1654 2279//1662 2277//1665 2266//1655
f 2276//653 2291//653 2289//1673 2274//1661
f 2274//1661 2289//1673 2279//1662 2268//1654
f 2304//1683 2330//1706 2328//1708 2302//1684
f 2338//1719 2339//1711 2327//1700 2326//1699
f 2327//1700 2339//1711 2336//1714 2323//1705
f 2323//1705 2336//1714 2330//1706 2304//1683
f 2302//1684 2328//1708 2291//653 2276//653
f 2345//591 2346//1720 2348//1721 2347//591
f 2352//1722 2353//1723 2355//1724 2354//1725
f 2350//1726 2353//1723 2352//1722 2349//1727
f 2352//1722 2354//1725 2351//1728 2349//1727
f 2358//591 2359//1729 2361//1730 2360//591
f 2357//1731 2359//1729 2358//591 2356//591
f 2363//1732 2364//1733 2366//1734 2365//1735
f 2369//1736 2370//1737 2368//1738 2367//1739
f 2374//1740 2375//1741 2373//1742 2371//1743
f 2367//1739 2368//1738 2355//1724 2353//1723
f 2366//1734 2373//1742 2372//1744 2365//1735
f 2371//1743 2373//1742 2366//1734 2364//1733
f 2347//591 2348//1721 2357//1731 2356//591
f 2354//1725 2355//1724 2364//1733 2363//1732
f 2354//1725 2363//1732 2362//1745 2351//1728
f 2370//1737 2374//1740 2371//1743 2368//1738
f 2346//1720 2349//1727 2351//1728 2348//1721
f 2359//1729 2363//1732 2365//1735 2361//1730
f 2362//1745 2363//1732 2359//1729 2357//1731
f 2348//1721 2351//1728 2362//1745 2357//1731
f 2368//1738 2371//1743 2364//1733 2355//1724
f 2379//591 2380//1746 2382//1747 2381//591
f 2383//1748 2384//1749 2386//1750 2385//1751
f 2386//1750 2389//1752 2388//1753 2385//1751
f 2387//1754 2389//1752 2386//1750 2384//1749
f 2392//591 2393//1755 2395//1756 2394//591
f 2391//1757 2393//1755 2392//591 2390//591
f 2397//1758 2398//1759 2400//1760 2399//1761
f 2377//1762 2380//1746 2379//591 2376//591
f 2381//591 2382//1747 2391//1757 2390//591
f 2388//1753 2389//1752 2398//1759 2397//1758
f 2388//1753 2397//1758 2396//1763 2385//1751
f 2380//1746 2383//1748 2385//1751 2382//1747
f 2393//1755 2397//1758 2399//1761 2395//1756
f 2396//1763 2397//1758 2393//1755 2391//1757
f 2382//1747 2385//1751 2396//1763 2391//1757
f 2378//1764 2383//1748 2380//1746 2377//1762
f 2403//653 2404//653 2402//1765 2401//1766
f 2407//1661 2408//1767 2406//1768 2405//1769
f 2411//1770 2412//1771 2410//1772 2409//1773
f 2415//1774 2416//653 2414//653 2413//653
f 2409//1773 2410//1772 2404//653 2403//653
f 2413//653 2414//653 2408//1767 2407//1661
f 2404//653 2407//1661 2405//1769 2402//1765
f 2412//1771 2415//1774 2413//653 2410//1772
f 2410//1772 2413//653 2407//1661 2404//653
f 2419//1775 2420//1776 2418//1777 2417//1778
f 2424//1779 2425//1780 2423//1781 2421//1782
f 2428//653 2429//653 2427//1674 2426//653
f 2432//653 2433//1766 2431//1783 2430//1784
f 2426//653 2427//1674 2420//1776 2419//1775
f 2430//1784 2431//1783 2425//1780 2424//1779
f 2420//1776 2424//1779 2421//1782 2418//1777
f 2429//653 2432//653 2430//1784 2427//1674
f 2427//1674 2430//1784 2424//1779 2420//1776
f 2401//1766 2402//1765 2370//1737 2369//1736
f 2405//1769 2406//1768 2375//1741 2374//1740
f 2402//1765 2405//1769 2374//1740 2370//1737
f 2417//1778 2418//1777 2389//1752 2387//1754
f 2400//1760 2423//1781 2422//1785 2399//1761
f 2421//1782 2423//1781 2400//1760 2398//1759
f 2418//1777 2421//1782 2398//1759 2389//1752
f 2360//591 2361//1730 2377//1762 2376//591
f 2372//1744 2373//1742 2384//1749 2383//1748
f 2375//1741 2387//1754 2384//1749 2373//1742
f 2361//1730 2365//1735 2378//1764 2377//1762
f 2372//1744 2383//1748 2378//1764 2365//1735
f 2408//1767 2419//1775 2417//1778 2406//1768
f 2416//653 2428//653 2426//653 2414//653
f 2414//653 2426//653 2419//1775 2408//1767
f 2406//1768 2417//1778 2387//1754 2375//1741
f 2261//1652 2262//1651 2232//1622 2231//1621
f 2265//1656 2266//1655 2240//1630 2239//1629
f 2262//1651 2265//1656 2239//1629 2232//1622
f 2277//1665 2278//1664 2253//1641 2251//1640
f 2257//1647 2282//1786 2281//591 2256//591
f 2259//1648 2284//1667 2283//1666 2258//1649
f 2283//1666 2285//1669 2260//1650 2258//1649
f 2260//1650 2285//1669 2282//1786 2257//1647
f 2278//1664 2284//1667 2259//1648 2253//1641
f 2266//1655 2277//1665 2251//1640 2240//1630
f 2281//591 2282//1786 2346//1720 2345//591
f 2285//1669 2286//1668 2350//1726 2349//1727
f 2288//1671 2353//1723 2350//1726 2286//1668
f 2296//1675 2369//1736 2367//1739 2294//1676
f 2282//1786 2285//1669 2349//1727 2346//1720
f 2294//1676 2367//1739 2353//1723 2288//1671
f 2335//1710 2403//653 2401//1766 2333//653
f 2344//1716 2411//1770 2409//1773 2342//1717
f 2342//1717 2409//1773 2403//653 2335//1710
f 2333//653 2401//1766 2369//1736 2296//1675
f 2434//591 2435//1787 2437//1788 2436//591
f 2435//1787 2438//1789 2439//1790 2437//1788
f 2442//1791 2443//1792 2445//1793 2444//1794
f 2446//1795 2447//1796 2445//1793 2443//1792
f 2448//591 2449//1797 2451//1798 2450//591
f 2451//1798 2453//1799 2452//1800 2450//591
f 2457//1801 2458//1802 2460//1803 2459//1804
f 2455//1805 2458//1802 2457//1801 2454//1806
f 2457//1801 2459//1804 2456//1807 2454//1806
f 2463//1808 2464//1809 2462//1810 2461//1811
f 2467//1812 2468//1813 2466//1814 2465//1815
f 2461//1811 2462//1810 2447//1796 2446//1795
f 2465//1815 2466//1814 2460//1803 2458//1802
f 2440//591 2441//1816 2449//1797 2448//591
f 2444//1794 2445//1793 2455//1805 2454//1806
f 2447//1796 2458//1802 2455//1805 2445//1793
f 2464//1809 2467//1812 2465//1815 2462//1810
f 2449//1797 2454//1806 2456//1807 2451//1798
f 2456//1807 2459//1804 2453//1799 2451//1798
f 2441//1816 2444//1794 2454//1806 2449//1797
f 2462//1810 2465//1815 2458//1802 2447//1796
f 2474//1817 2476//1818 2475//973 2473//1819
f 2478//1820 2480//1821 2479//1822 2477//1823
f 2470//1824 2474//1817 2473//1819 2469//1825
f 2472//1826 2478//1820 2477//1823 2471//1827
f 2477//1823 2479//1822 2476//1818 2474//1817
f 2471//1827 2477//1823 2474//1817 2470//1824
f 2437//1788 2441//1816 2440//591 2436//591
f 2442//1791 2444//1794 2439//1790 2438//1789
f 2439//1790 2444//1794 2441//1816 2437//1788
f 2452//1800 2453//1799 2470//1824 2469//1825
f 2459//1804 2460//1803 2472//1826 2471//1827
f 2468//1813 2480//1821 2478//1820 2466//1814
f 2453//1799 2459//1804 2471//1827 2470//1824
f 2466//1814 2478//1820 2472//1826 2460//1803
f 2483//1828 2484//1829 2486//1830 2485//1831
f 2491//1828 2492//1832 2494//1833 2493//1828
f 2491//1828 2495//1834 2496//1835 2492//1832
f 2500//1836 2501//1837 2503//1838 2502//1839
f 2498//1840 2502//1839 2503//1838 2499//1841
f 2500//1836 2502//1839 2498//1840 2497//1842
f 2506//1843 2507//1844 2509//1845 2508//1846
f 2510//1847 2511//1848 2509//1845 2507//1844
f 2483//1828 2504//1828 2505//1849 2484//1829
f 2489//1850 2508//1846 2509//1845 2490//1851
f 2506//1843 2508//1846 2489//1850 2488//1852
f 2493//1828 2494//1833 2505//1849 2504//1828
f 2498//1840 2499//1841 2507//1844 2506//1843
f 2503//1838 2510//1847 2507//1844 2499//1841
f 2484//1829 2488//1852 2489//1850 2486//1830
f 2492//1832 2497//1842 2498//1840 2494//1833
f 2492//1832 2496//1835 2500//1836 2497//1842
f 2494//1833 2498//1840 2506//1843 2505//1849
f 2484//1829 2505//1849 2506//1843 2488//1852
f 2512//1853 2514//1854 2515//1855 2513//1856
f 2518//1857 2519//1858 2517//1859 2516//1860
f 2520//1861 2521//1862 2523//1863 2522//1864
f 2518//1857 2522//1864 2523//1863 2519//1858
f 2520//1861 2522//1864 2518//1857 2516//1860
f 2526//1865 2527//1866 2525//1867 2524//1868
f 2530//1869 2531//1870 2529//1871 2528//1872
f 2534//1873 2535//1874 2533//1875 2532//1876
f 2528//1872 2529//1871 2523//1863 2521//1862
f 2532//1876 2533//1875 2527//1866 2526//1865
f 2523//1863 2526//1865 2524//1868 2519//1858
f 2531//1870 2534//1873 2532//1876 2529//1871
f 2513//1856 2515//1855 2520//1861 2516//1860
f 2529//1871 2532//1876 2526//1865 2523//1863
f 2538//1877 2539//1878 2537//1879 2536//1880
f 2542//1881 2543//1882 2541//1883 2540//1884
f 2546//653 2547//653 2545//1885 2544//1886
f 2550//653 2551//1091 2549//653 2548//653
f 2544//1886 2545//1885 2539//1878 2538//1877
f 2548//653 2549//653 2543//1882 2542//1881
f 2539//1878 2542//1881 2540//1884 2537//1879
f 2547//653 2550//653 2548//653 2545//1885
f 2545//1885 2548//653 2542//1881 2539//1878
f 2554//1887 2555//653 2553//1888 2552//1889
f 2558//653 2559//1073 2557//653 2556//1065
f 2562//1890 2563//1891 2561//1072 2560//653
f 2566//1892 2567//1893 2565//1097 2564//1894
f 2560//653 2561//1072 2555//653 2554//1887
f 2564//1894 2565//1097 2559//1073 2558//653
f 2555//653 2558//653 2556//1065 2553//1888
f 2563//1891 2566//1892 2564//1894 2561//1072
f 2561//1072 2564//1894 2558//653 2555//653
f 2536//1880 2537//1879 2503//1838 2501//1837
f 2540//1884 2541//1883 2511//1848 2510//1847
f 2537//1879 2540//1884 2510//1847 2503//1838
f 2552//1889 2553//1888 2531//1870 2530//1869
f 2556//1065 2557//653 2535//1874 2534//1873
f 2553//1888 2556//1065 2534//1873 2531//1870
f 2512//1853 2513//1856 2482//1895 2481//1896
f 2485//1831 2486//1830 2515//1855 2514//1854
f 2489//1850 2490//1851 2521//1862 2520//1861
f 2511//1848 2530//1869 2528//1872 2509//1845
f 2513//1856 2516//1860 2487//1897 2482//1895
f 2486//1830 2489//1850 2520//1861 2515//1855
f 2509//1845 2528//1872 2521//1862 2490//1851
f 2543//1882 2554//1887 2552//1889 2541//1883
f 2551//1091 2562//1890 2560//653 2549//653
f 2549//653 2560//653 2554//1887 2543//1882
f 2541//1883 2552//1889 2530//1869 2511//1848
f 2570//1898 2571//1899 2569//1900 2568//1901
f 2574//1902 2575//653 2573//653 2572//1903
f 2578//1005 2579//653 2577//1904 2576//1905
f 2582//653 2583//653 2581//653 2580//1885
f 2576//1905 2577//1904 2571//1899 2570//1898
f 2580//1885 2581//653 2575//653 2574//1902
f 2571//1899 2574//1902 2572//1903 2569//1900
f 2579//653 2582//653 2580//1885 2577//1904
f 2577//1904 2580//1885 2574//1902 2571//1899
f 2586//653 2587//653 2585//653 2584//653
f 2590//653 2591//653 2589//653 2588//653
f 2594//1091 2595//1890 2593//653 2592//653
f 2598//1906 2599//1907 2597//1894 2596//1072
f 2592//653 2593//653 2587//653 2586//653
f 2596//1072 2597//1894 2591//653 2590//653
f 2587//653 2590//653 2588//653 2585//653
f 2595//1890 2598//1906 2596//1072 2593//653
f 2593//653 2596//1072 2590//653 2587//653
f 2602//1075 2603//1908 2601//653 2600//653
f 2606//1909 2607//1910 2605//1100 2604//1101
f 2610//1911 2611//1912 2609//1913 2608//1914
f 2617//1915 2618//1916 2616//1917 2615//1918
f 2616//1917 2618//1916 2614//1919 2613//1920
f 2608//1914 2609//1913 2603//1908 2602//1075
f 2613//1920 2614//1919 2607//1910 2606//1909
f 2603//1908 2606//1909 2604//1101 2601//653
f 2611//1912 2616//1917 2613//1920 2609//1913
f 2609//1913 2613//1920 2606//1909 2603//1908
f 2621//1921 2622//1922 2620//1923 2619//1924
f 2625//1925 2627//1926 2624//1927 2623//1928
f 2630//1929 2631//1930 2629//1931 2628//1932
f 2634//1933 2635//1934 2633//1935 2632//1936
f 2633//1935 2637//1937 2636//1938 2632//1936
f 2636//1938 2638//1939 2634//1933 2632//1936
f 2641//1128 2642//1940 2640//1941 2639//1128
f 2640//1941 2644//1942 2643//1128 2639//1128
f 2647//1943 2648//1944 2646//1945 2645//1946
f 2633//1935 2635//1934 2622//1922 2621//1921
f 2627//1926 2648//1944 2647//1943 2626//1947
f 2646//1945 2648//1944 2627//1926 2625//1925
f 2643//1128 2644//1942 2631//1930 2630//1929
f 2622//1922 2625//1925 2623//1928 2620//1923
f 2645//1946 2646//1945 2635//1934 2634//1933
f 2638//1939 2649//1948 2645//1946 2634//1933
f 2631//1930 2638//1939 2636//1938 2629//1931
f 2642//1940 2647//1943 2645//1946 2640//1941
f 2645//1946 2649//1948 2644//1942 2640//1941
f 2644//1942 2649//1948 2638//1939 2631//1930
f 2635//1934 2646//1945 2625//1925 2622//1922
f 2600//653 2601//653 2579//653 2578//1005
f 2604//1101 2605//1100 2583//653 2582//653
f 2601//653 2604//1101 2582//653 2579//653
f 2619//1924 2620//1923 2595//1890 2594//1091
f 2623//1928 2624//1927 2599//1907 2598//1906
f 2620//1923 2623//1928 2598//1906 2595//1890
f 2575//653 2586//653 2584//653 2573//653
f 2583//653 2594//1091 2592//653 2581//653
f 2581//653 2592//653 2586//653 2575//653
f 2607//1910 2621//1921 2619//1924 2605//1100
f 2636//1938 2637//1937 2618//1916 2617//1915
f 2618//1916 2637//1937 2633//1935 2614//1919
f 2629//1931 2636//1938 2617//1915 2612//1949
f 2614//1919 2633//1935 2621//1921 2607//1910
f 2605//1100 2619//1924 2594//1091 2583//653
f 2652//1950 2653//1951 2651//1101 2650//653
f 2656//1952 2657//1953 2655//1954 2654//1100
f 2660//1955 2662//1956 2659//1957 2658//1958
f 2671//1959 2672//1960 2670//1961 2669//1962
f 2668//1963 2672//1960 2671//1959 2667//1964
f 2670//1961 2672//1960 2668//1963 2666//1965
f 2658//1958 2659//1957 2653//1951 2652//1950
f 2666//1965 2668//1963 2657//1953 2656//1952
f 2653//1951 2656//1952 2654//1100 2651//1101
f 2669//1962 2670//1961 2662//1956 2661//1966
f 2662//1956 2670//1961 2666//1965 2659//1957
f 2665//1967 2671//1959 2669//1962 2663//1968
f 2659//1957 2666//1965 2656//1952 2653//1951
f 2675//1969 2676//1970 2674//1971 2673//1972
f 2683//1973 2684//1974 2682//1975 2681//1976
f 2682//1975 2684//1974 2680//1977 2679//1978
f 2689//1128 2690//1979 2688//1980 2687//1112
f 2686//1941 2690//1979 2689//1128 2685//1128
f 2693//1981 2694//1982 2692//1983 2691//1984
f 2695//1985 2696//1986 2693//1981 2691//1984
f 2699//1128 2700//1987 2698//1988 2697//1128
f 2692//1983 2694//1982 2676//1970 2675//1969
f 2678//1989 2700//1987 2699//1128 2677//1128
f 2682//1975 2702//1990 2701//1991 2681//1976
f 2701//1991 2703//1992 2683//1973 2681//1976
f 2697//1128 2698//1988 2686//1941 2685//1128
f 2676//1970 2682//1975 2679//1978 2674//1971
f 2701//1991 2702//1990 2694//1982 2693//1981
f 2690//1979 2696//1986 2695//1985 2688//1980
f 2693//1981 2696//1986 2690//1979 2686//1941
f 2700//1987 2703//1992 2701//1991 2698//1988
f 2698//1988 2701//1991 2693//1981 2686//1941
f 2683//1973 2703//1992 2700//1987 2678//1989
f 2694//1982 2702//1990 2682//1975 2676//1970
f 2706//1993 2707//1994 2705//1995 2704//1128
f 2705//1995 2709//1996 2708//1128 2704//1128
f 2712//1997 2713//1998 2711//1999 2710//2000
f 2717//2001 2718//2002 2716//2003 2715//2004
f 2715//2004 2716//2003 2707//1994 2706//1993
f 2707//1994 2712//1997 2710//2000 2705//1995
f 2710//2000 2714//2005 2709//1996 2705//1995
f 2716//2003 2719//2006 2712//1997 2707//1994
f 2662//1956 2713//1998 2712//1997 2661//1966
f 2711//1999 2713//1998 2662//1956 2660//1955
f 2665//1967 2718//2002 2717//2001 2664//2007
f 2716//2003 2718//2002 2665//1967 2663//1968
f 2669//1962 2719//2006 2716//2003 2663//1968
f 2712//1997 2719//2006 2669//1962 2661//1966
f 2687//1112 2688//1980 2665//1967 2664//2007
f 2657//1953 2675//1969 2673//1972 2655//1954
f 2691//1984 2692//1983 2668//1963 2667//1964
f 2671//1959 2695//1985 2691//1984 2667//1964
f 2688//1980 2695//1985 2671//1959 2665//1967
f 2668//1963 2692//1983 2675//1969 2657//1953
f 2724//1128 2725//2008 2723//2009 2722//1128
f 2721//2010 2725//2008 2724//1128 2720//1128
f 2728//2011 2729//2012 2727//2013 2726//2014
f 2727//2013 2731//2015 2730//2016 2726//2014
f 2730//2016 2732//2017 2728//2011 2726//2014
f 2735//2018 2736//2019 2734//2020 2733//2021
f 2733//2021 2734//2020 2721//2010 2720//1128
f 2737//2022 2738//2023 2729//2012 2728//2011
f 2725//2008 2732//2017 2730//2016 2723//2009
f 2728//2011 2732//2017 2725//2008 2721//2010
f 2736//2019 2739//2024 2737//2022 2734//2020
f 2734//2020 2737//2022 2728//2011 2721//2010
f 2740//2025 2741//2026 2736//2019 2735//2018
f 2650//653 2651//1101 2547//653 2546//653
f 2654//1100 2655//1954 2551//1091 2550//653
f 2651//1101 2654//1100 2550//653 2547//653
f 2673//1972 2674//1971 2563//1891 2562//1890
f 2679//1978 2680//1977 2567//1893 2566//1892
f 2674//1971 2679//1978 2566//1892 2563//1891
f 2655//1954 2673//1972 2562//1890 2551//1091
f 2727//2013 2729//2012 2611//1912 2610//1911
f 2616//1917 2738//2023 2737//2022 2615//1918
f 2737//2022 2739//2024 2617//1915 2615//1918
f 2617//1915 2739//2024 2736//2019 2612//1949
f 2729//2012 2738//2023 2616//1917 2611//1912
f 2629//1931 2741//2026 2740//2025 2628//1932
f 2736//2019 2741//2026 2629//1931 2612//1949
f 2527//1866 2570//1898 2568//1901 2525//1867
f 2535//1874 2578//1005 2576//1905 2533//1875
f 2533//1875 2576//1905 2570//1898 2527//1866
f 2559//1073 2602//1075 2600//653 2557//653
f 2567//1893 2610//1911 2608//1914 2565//1097
f 2565//1097 2608//1914 2602//1075 2559//1073
f 2557//653 2600//653 2578//1005 2535//1874
f 2722//1128 2723//2009 2678//1989 2677//1128
f 2730//2016 2731//2015 2684//1974 2683//1973
f 2684//1974 2731//2015 2727//2013 2680//1977
f 2723//2009 2730//2016 2683//1973 2678//1989
f 2680//1977 2727//2013 2610//1911 2567//1893
f 2744//1073 2745//2027 2743//2028 2742//653
f 2748//2029 2749//2030 2747//2031 2746//2032
f 2752//2033 2753//2034 2751//2035 2750//2036
f 2756//2037 2758//2038 2755//2039 2754//2040
f 2750//2036 2751//2035 2745//2027 2744//1073
f 2754//2040 2755//2039 2749//2030 2748//2029
f 2745//2027 2748//2029 2746//2032 2743//2028
f 2753//2034 2756//2037 2754//2040 2751//2035
f 2751//2035 2754//2040 2748//2029 2745//2027
f 2760//1818 2762//1818 2761//973 2759//973
f 2764//2041 2766//2042 2765//2043 2763//2043
f 2768//2044 2770//2045 2769//2046 2767//973
f 2772//2047 2774//2048 2773//2049 2771//2050
f 2762//1818 2768//2044 2767//973 2761//973
f 2766//2042 2772//2047 2771//2050 2765//2043
f 2763//2043 2765//2043 2762//1818 2760//1818
f 2771//2050 2773//2049 2770//2045 2768//2044
f 2765//2043 2771//2050 2768//2044 2762//1818
f 2777//1128 2778//2051 2776//2052 2775//1128
f 2784//2053 2785//2054 2783//2055 2782//2056
f 2781//2057 2785//2054 2784//2053 2780//2058
f 2783//2055 2785//2054 2781//2057 2779//2059
f 2788//2060 2789//2061 2787//2062 2786//1128
f 2787//2062 2791//2063 2790//1128 2786//1128
f 2794//2064 2795//2065 2793//2066 2792//2067
f 2776//2052 2798//2068 2797//1128 2775//1128
f 2790//1128 2791//2063 2778//2051 2777//1128
f 2792//2067 2793//2066 2781//2057 2780//2058
f 2784//2053 2796//2069 2792//2067 2780//2058
f 2778//2051 2784//2053 2782//2056 2776//2052
f 2789//2061 2794//2064 2792//2067 2787//2062
f 2792//2067 2796//2069 2791//2063 2787//2062
f 2791//2063 2796//2069 2784//2053 2778//2051
f 2782//2056 2799//2070 2798//2068 2776//2052
f 2779//2059 2781//2057 2753//2034 2752//2033
f 2758//2038 2795//2065 2794//2064 2757//2071
f 2793//2066 2795//2065 2758//2038 2756//2037
f 2781//2057 2793//2066 2756//2037 2753//2034
f 2770//2045 2801//2072 2800//2073 2769//2046
f 2773//2049 2802//2074 2801//2072 2770//2045
f 2749//2030 2766//2042 2764//2041 2747//2031
f 2773//2049 2774//2048 2758//2038 2757//2071
f 2758//2038 2774//2048 2772//2047 2755//2039
f 2755//2039 2772//2047 2766//2042 2749//2030
f 2800//2073 2801//2072 2789//2061 2788//2060
f 2801//2072 2802//2074 2794//2064 2789//2061
f 2794//2064 2802//2074 2773//2049 2757//2071
f 2319//1686 2481//1896 2482//1895 2320//1697
f 2320//1697 2482//1895 2487//1897 2326//1699
f 2338//1719 2516//1860 2517//1859 2339//1711
f 2517//1859 2519//1858 2340//1712 2339//1711
f 2524//1868 2525//1867 2344//1716 2343//1715
f 2519//1858 2524//1868 2343//1715 2340//1712
f 2487//1897 2516//1860 2338//1719 2326//1699
f 2568//1901 2569//1900 2412//1771 2411//1770
f 2572//1903 2573//653 2416//653 2415//1774
f 2569//1900 2572//1903 2415//1774 2412//1771
f 2584//653 2585//653 2429//653 2428//653
f 2588//653 2589//653 2433//1766 2432//653
f 2585//653 2588//653 2432//653 2429//653
f 2573//653 2584//653 2428//653 2416//653
f 2525//1867 2568//1901 2411//1770 2344//1716
f 2742//653 2743//2028 2464//1809 2463//1808
f 2746//2032 2747//2031 2468//1813 2467//1812
f 2743//2028 2746//2032 2467//1812 2464//1809
f 2476//1818 2760//1818 2759//973 2475//973
f 2480//1821 2764//2041 2763//2043 2479//1822
f 2479//1822 2763//2043 2760//1818 2476//1818
f 2747//2031 2764//2041 2480//1821 2468//1813
f 2394//591 2395//1756 2435//1787 2434//591
f 2395//1756 2399//1761 2438//1789 2435//1787
f 2422//1785 2423//1781 2443//1792 2442//1791
f 2425//1780 2446//1795 2443//1792 2423//1781
f 2433//1766 2463//1808 2461//1811 2431//1783
f 2431//1783 2461//1811 2446//1795 2425//1780
f 2422//1785 2442//1791 2438//1789 2399//1761
f 2591//653 2744//1073 2742//653 2589//653
f 2599//1907 2752//2033 2750//2036 2597//1894
f 2597//1894 2750//2036 2744//1073 2591//653
f 2797//1128 2798//2068 2642//1940 2641//1128
f 2782//2056 2783//2055 2627//1926 2626//1947
f 2627//1926 2783//2055 2779//2059 2624//1927
f 2798//2068 2799//2070 2647//1943 2642//1940
f 2647//1943 2799//2070 2782//2056 2626//1947
f 2624//1927 2779//2059 2752//2033 2599//1907
f 2589//653 2742//653 2463//1808 2433//1766
f 2803//66 2805//66 2806//11 2804//11
f 2807//12 2809//12 2810//13 2808//13
f 2811//66 2813//2075 2814//11 2812//11
f 2815//12 2817//12 2818//13 2816//13
f 2805//66 2811//66 2812//11 2806//11
f 2809//12 2815//12 2816//13 2810//13
f 2804//11 2806//11 2809//12 2807//12
f 2812//11 2814//11 2817//12 2815//12
f 2806//11 2812//11 2815//12 2809//12
f 2819//71 2820//70 2822//2076 2821//2077
f 2823//78 2824//524 2826//2078 2825//2079
f 2827//2080 2828//2081 2830//2082 2829//2083
f 2831//2084 2832//2085 2834//2086 2833//2087
f 2821//2077 2822//2076 2828//2081 2827//2080
f 2825//2079 2826//2078 2832//2085 2831//2084
f 2820//70 2823//78 2825//2079 2822//2076
f 2828//2081 2831//2084 2833//2087 2830//2082
f 2822//2076 2825//2079 2831//2084 2828//2081
f 2836//2088 2838//2089 2839//2090 2837//2091
f 2840//2092 2842//2093 2843//2094 2841//13
f 2842//2093 2845//2095 2846//2096 2843//2094
f 2837//2091 2839//2090 2842//2093 2840//2092
f 2839//2090 2844//2097 2845//2095 2842//2093
f 2852//2098 2853//2099 2851//2100 2850//2101
f 2849//2102 2853//2099 2852//2098 2848//2103
f 2847//2104 2848//2103 2852//2098 2850//2101
f 2856//2105 2857//562 2855//562 2854//2106
f 2860//2107 2861//2108 2859//2109 2858//2110
f 2865//2111 2866//2112 2864//562 2863//2113
f 2864//562 2868//562 2867//2114 2863//2113
f 2855//562 2871//2115 2870//2116 2854//2106
f 2858//2110 2859//2109 2849//2102 2848//2103
f 2849//2102 2859//2109 2862//2117 2853//2099
f 2867//2114 2868//562 2857//562 2856//2105
f 2853//2099 2856//2105 2854//2106 2851//2100
f 2861//2108 2865//2111 2863//2113 2859//2109
f 2863//2113 2867//2114 2862//2117 2859//2109
f 2862//2117 2867//2114 2856//2105 2853//2099
f 2854//2106 2870//2116 2869//2118 2851//2100
f 2813//2075 2836//2088 2837//2091 2814//11
f 2817//12 2840//2092 2841//13 2818//13
f 2814//11 2837//2091 2840//2092 2817//12
f 2829//2083 2830//2082 2848//2103 2847//2104
f 2835//2119 2861//2108 2860//2107 2834//2086
f 2833//2087 2834//2086 2860//2107 2858//2110
f 2830//2082 2833//2087 2858//2110 2848//2103
f 2803//66 2819//71 2821//2077 2805//66
f 2811//66 2827//2080 2829//2083 2813//2075
f 2805//66 2821//2077 2827//2080 2811//66
f 2850//2101 2851//2100 2839//2090 2838//2089
f 2836//2088 2847//2104 2850//2101 2838//2089
f 2870//2116 2871//2115 2846//2096 2845//2095
f 2869//2118 2870//2116 2845//2095 2844//2097
f 2839//2090 2851//2100 2869//2118 2844//2097
f 2813//2075 2829//2083 2847//2104 2836//2088
f 2872//2120 2873//2121 2875//2122 2874//2123
f 2876//2124 2877//2125 2879//2126 2878//2127
f 2885//2128 2886//2129 2884//2130 2883//2131
f 2882//2132 2886//2129 2885//2128 2881//2133
f 2880//2134 2881//2133 2885//2128 2883//2131
f 2892//2135 2893//2136 2891//2137 2890//2138
f 2891//2137 2893//2136 2895//2139 2894//2140
f 2900//2141 2901//562 2899//2142 2898//2143
f 2897//562 2901//562 2900//2141 2896//569
f 2874//2123 2875//2122 2881//2133 2880//2134
f 2878//2127 2879//2126 2892//2135 2890//2138
f 2873//2121 2876//2124 2878//2127 2875//2122
f 2890//2138 2891//2137 2882//2132 2881//2133
f 2882//2132 2891//2137 2894//2140 2886//2129
f 2898//2143 2899//2142 2889//2144 2888//2145
f 2886//2129 2888//2145 2887//2146 2884//2130
f 2895//2139 2900//2141 2898//2143 2894//2140
f 2896//569 2900//2141 2895//2139 2893//2136
f 2894//2140 2898//2143 2888//2145 2886//2129
f 2875//2122 2878//2127 2890//2138 2881//2133
f 2906//2147 2907//2148 2905//2149 2904//2150
f 2902//2151 2903//2152 2906//2147 2904//2150
f 2912//2153 2913//2154 2911//2155 2910//2156
f 2911//2155 2915//2157 2914//2158 2910//2156
f 2911//2155 2913//2154 2916//2159 2915//2157
f 2921//2160 2922//562 2920//562 2919//2161
f 2918//562 2922//562 2921//2160 2917//2162
f 2928//2163 2929//562 2927//562 2926//2164
f 2905//2149 2924//2165 2923//2166 2904//2150
f 2905//2149 2907//2148 2925//2167 2924//2165
f 2909//562 2929//562 2928//2163 2908//2168
f 2914//2158 2915//2157 2907//2148 2906//2147
f 2903//2152 2910//2156 2914//2158 2906//2147
f 2919//2161 2920//562 2909//562 2908//2168
f 2916//2159 2921//2160 2919//2161 2915//2157
f 2917//2162 2921//2160 2916//2159 2913//2154
f 2925//2167 2928//2163 2926//2164 2924//2165
f 2915//2157 2919//2161 2908//2168 2907//2148
f 2908//2168 2928//2163 2925//2167 2907//2148
f 2933//2169 2934//2170 2932//2171 2931//2172
f 2889//2144 2934//2170 2933//2169 2888//2145
f 2887//2146 2888//2145 2933//2169 2931//2172
f 2887//2146 2931//2172 2930//2173 2884//2130
f 2877//2125 2902//2151 2904//2150 2879//2126
f 2923//2166 2924//2165 2893//2136 2892//2135
f 2926//2164 2927//562 2897//562 2896//569
f 2924//2165 2926//2164 2896//569 2893//2136
f 2879//2126 2904//2150 2923//2166 2892//2135
f 2940//2174 2941//2175 2939//2112 2938//2176
f 2942//2177 2943//2178 2941//2175 2940//2174
f 2937//2179 2940//2174 2938//2176 2936//2180
f 2935//2181 2936//2180 2913//2154 2912//2153
f 2938//2176 2939//2112 2918//562 2917//2162
f 2936//2180 2938//2176 2917//2162 2913//2154
f 2824//524 2872//2120 2874//2123 2826//2078
f 2883//2131 2884//2130 2835//2119 2834//2086
f 2832//2085 2880//2134 2883//2131 2834//2086
f 2826//2078 2874//2123 2880//2134 2832//2085
f 2931//2172 2932//2171 2866//2112 2865//2111
f 2930//2173 2931//2172 2865//2111 2861//2108
f 2835//2119 2884//2130 2930//2173 2861//2108
f 2944//583 2946//583 2947//584 2945//584
f 2948//585 2950//585 2951//639 2949//639
f 2952//583 2954//583 2955//584 2953//584
f 2956//585 2958//585 2959//2182 2957//639
f 2946//583 2952//583 2953//584 2947//584
f 2950//585 2956//585 2957//639 2951//639
f 2945//584 2947//584 2950//585 2948//585
f 2953//584 2955//584 2958//585 2956//585
f 2947//584 2953//584 2956//585 2950//585
f 2962//2183 2963//2184 2961//642 2960//641
f 2966//2185 2967//2186 2965//1101 2964//654
f 2970//2187 2971//2188 2969//2189 2968//2190
f 2974//2191 2976//2192 2973//2193 2972//2194
f 2968//2190 2969//2189 2963//2184 2962//2183
f 2972//2194 2973//2193 2967//2186 2966//2185
f 2963//2184 2966//2185 2964//654 2961//642
f 2971//2188 2974//2191 2972//2194 2969//2189
f 2969//2189 2972//2194 2966//2185 2963//2184
f 2977//583 2979//2195 2980//2196 2978//2197
f 2981//2198 2983//2199 2984//2200 2982//2201
f 2979//2195 2985//2202 2986//2203 2980//2196
f 2978//2197 2980//2196 2983//2199 2981//2198
f 2980//2196 2986//2203 2987//2204 2983//2199
f 2990//1128 2991//2205 2989//2206 2988//1128
f 2997//2207 2998//2208 2996//2209 2995//2210
f 2994//2211 2998//2208 2997//2207 2993//2212
f 2996//2209 2998//2208 2994//2211 2992//2213
f 3001//2214 3002//2215 3000//2216 2999//1128
f 3000//2216 3004//2217 3003//1128 2999//1128
f 3007//2218 3008//2219 3006//2220 3005//2221
f 2989//2206 3011//2222 3010//2223 2988//1128
f 3003//1128 3004//2217 2991//2205 2990//1128
f 3005//2221 3006//2220 2994//2211 2993//2212
f 2997//2207 3009//2224 3005//2221 2993//2212
f 2991//2205 2997//2207 2995//2210 2989//2206
f 3002//2215 3007//2218 3005//2221 3000//2216
f 3005//2221 3009//2224 3004//2217 3000//2216
f 3004//2217 3009//2224 2997//2207 2991//2205
f 2995//2210 3012//2225 3011//2222 2989//2206
f 2954//583 2977//583 2978//2197 2955//584
f 2958//585 2981//2198 2982//2201 2959//2182
f 2955//584 2978//2197 2981//2198 2958//585
f 2992//2213 2994//2211 2971//2188 2970//2187
f 2976//2192 3008//2219 3007//2218 2975//2226
f 3006//2220 3008//2219 2976//2192 2974//2191
f 2994//2211 3006//2220 2974//2191 2971//2188
f 2951//639 2962//2183 2960//641 2949//639
f 2959//2182 2970//2187 2968//2190 2957//639
f 2957//639 2968//2190 2962//2183 2951//639
f 3010//2223 3011//2222 2986//2203 2985//2202
f 2995//2210 2996//2209 2984//2200 2983//2199
f 2984//2200 2996//2209 2992//2213 2982//2201
f 3011//2222 3012//2225 2987//2204 2986//2203
f 2987//2204 3012//2225 2995//2210 2983//2199
f 2982//2201 2992//2213 2970//2187 2959//2182
f 3015//2227 3016//2228 3014//2229 3013//2230
f 3019//2231 3020//2232 3018//2233 3017//2234
f 3029//2235 3030//2236 3028//2237 3027//2238
f 3026//2239 3030//2236 3029//2235 3025//2240
f 3028//2237 3030//2236 3026//2239 3024//2241
f 3035//1128 3036//2242 3034//2243 3033//2244
f 3032//2245 3036//2242 3035//1128 3031//1128
f 3039//2246 3040//2247 3038//2248 3037//2249
f 3041//2250 3042//2251 3039//2246 3037//2249
f 3024//2241 3026//2239 3016//2228 3015//2227
f 3038//2248 3040//2247 3020//2232 3019//2231
f 3033//2244 3034//2243 3023//2252 3022//2253
f 3016//2228 3019//2231 3017//2234 3014//2229
f 3037//2249 3038//2248 3026//2239 3025//2240
f 3029//2235 3041//2250 3037//2249 3025//2240
f 3023//2252 3029//2235 3027//2238 3021//2254
f 3036//2242 3042//2251 3041//2250 3034//2243
f 3039//2246 3042//2251 3036//2242 3032//2245
f 3034//2243 3041//2250 3029//2235 3023//2252
f 3026//2239 3038//2248 3019//2231 3016//2228
f 3049//2255 3050//2256 3048//2257 3047//2258
f 3048//2257 3050//2256 3046//2259 3045//2260
f 3055//1128 3056//2261 3054//2262 3053//1128
f 3052//2263 3056//2261 3055//1128 3051//1128
f 3059//2264 3060//2265 3058//2266 3057//2267
f 3058//2266 3062//2268 3061//2269 3057//2267
f 3061//2269 3063//2270 3059//2264 3057//2267
f 3066//1128 3067//2271 3065//2272 3064//1128
f 3044//2273 3067//2271 3066//1128 3043//1128
f 3048//2257 3069//2274 3068//2275 3047//2258
f 3068//2275 3070//2276 3049//2255 3047//2258
f 3053//1128 3054//2262 3044//2273 3043//1128
f 3061//2269 3062//2268 3050//2256 3049//2255
f 3050//2256 3062//2268 3058//2266 3046//2259
f 3056//2261 3063//2270 3061//2269 3054//2262
f 3059//2264 3063//2270 3056//2261 3052//2263
f 3067//2271 3070//2276 3068//2275 3065//2272
f 3054//2262 3061//2269 3049//2255 3044//2273
f 3049//2255 3070//2276 3067//2271 3044//2273
f 3073//2277 3074//2278 3072//2279 3071//2280
f 3023//2252 3074//2278 3073//2277 3022//2253
f 3072//2279 3074//2278 3023//2252 3021//2254
f 3027//2238 3075//2281 3072//2279 3021//2254
f 3064//1128 3065//2272 3032//2245 3031//1128
f 3020//2232 3048//2257 3045//2260 3018//2233
f 3068//2275 3069//2274 3040//2247 3039//2246
f 3065//2272 3068//2275 3039//2246 3032//2245
f 3040//2247 3069//2274 3048//2257 3020//2232
f 3078//2282 3079//2283 3077//2284 3076//2214
f 3083//2285 3084//2286 3079//2283 3078//2282
f 3079//2283 3082//2287 3080//2288 3077//2284
f 3076//2214 3077//2284 3052//2263 3051//1128
f 3080//2288 3081//2289 3060//2265 3059//2264
f 3077//2284 3080//2288 3059//2264 3052//2263
f 2967//2186 3015//2227 3013//2230 2965//1101
f 3027//2238 3028//2237 2976//2192 2975//2226
f 2976//2192 3028//2237 3024//2241 2973//2193
f 2973//2193 3024//2241 3015//2227 2967//2186
f 3071//2280 3072//2279 3002//2215 3001//2214
f 3072//2279 3075//2281 3007//2218 3002//2215
f 3007//2218 3075//2281 3027//2238 2975//2226
f 487//66 2803//66 2804//11 488//11
f 491//12 2807//12 2808//13 492//13
f 488//11 2804//11 2807//12 491//12
f 507//71 508//70 2820//70 2819//71
f 511//78 512//79 2824//524 2823//78
f 508//70 511//78 2823//78 2820//70
f 487//66 507//71 2819//71 2803//66
f 700//79 701//495 2873//2121 2872//2120
f 704//498 705//497 2877//2125 2876//2124
f 701//495 704//498 2876//2124 2873//2121
f 716//506 717//505 2903//2152 2902//2151
f 720//510 721//509 2912//2153 2910//2156
f 717//505 720//510 2910//2156 2903//2152
f 705//497 716//506 2902//2151 2877//2125
f 765//534 2936//2180 2935//2181 764//535
f 765//534 767//533 2937//2179 2936//2180
f 777//547 2943//2178 2942//2177 776//548
f 768//549 2940//2174 2937//2179 767//533
f 768//549 776//548 2942//2177 2940//2174
f 721//509 764//535 2935//2181 2912//2153
f 512//79 700//79 2872//2120 2824//524
f 1296//583 2944//583 2945//584 1297//584
f 1300//585 2948//585 2949//639 1301//639
f 1297//584 2945//584 2948//585 1300//585
f 2960//641 2961//642 1317//642 1316//641
f 2964//654 2965//1101 1321//653 1320//654
f 2961//642 2964//654 1320//654 1317//642
f 2949//639 2960//641 1316//641 1301//639
f 3013//2230 3014//2229 1510//1068 1509//653
f 3017//2234 3018//2233 1514//1071 1513//1070
f 3014//2229 3017//2234 1513//1070 1510//1068
f 3045//2260 3046//2259 1526//1078 1525//1077
f 3058//2266 3060//2265 1530//1082 1529//1081
f 3046//2259 3058//2266 1529//1081 1526//1078
f 3018//2233 3045//2260 1525//1077 1514//1071
f 1575//1108 3081//2289 3080//2288 1574//1109
f 3080//2288 3082//2287 1576//1106 1574//1109
f 1579//1114 3084//2286 3083//2285 1578//1115
f 1576//1106 3082//2287 3079//2283 1571//1123
f 3079//2283 3084//2286 1579//1114 1571//1123
f 3060//2265 3081//2289 1575//1108 1530//1082
f 2965//1101 3013//2230 1509//653 1321//653
f 301//239 302//238 1621//1150 1620//1149
f 299//236 1619//1172 1621//1150 302//238
f 312//248 1636//1158 1639//1161 314//249
f 305//242 306//23 1625//23 1624//1155
f 299//236 305//242 1624//1155 1619//1172
f 301//239 1620//1149 1636//1158 312//248
f 405//309 1669//1188 1671//79 407//79
f 413//315 1677//1194 1679//1196 415//316
f 407//79 1671//79 1677//1194 413//315
f 437//328 1705//1215 1707//1218 440//323
f 1713//1226 1714//1225 449//336 448//342
f 1719//1232 1720//1233 454//338 453//341
f 1714//1225 1719//1232 453//341 449//336
f 440//323 1707//1218 1713//1226 448//342
f 415//316 1679//1196 1705//1215 437//328
f 314//249 1639//1161 1669//1188 405//309
f 595//435 596//409 1903//1369 1902//1368
f 599//412 600//411 1911//1379 1910//1378
f 596//409 599//412 1910//1378 1903//1369
f 623//424 1944//1414 1946//1417 626//425
f 632//432 1952//1422 1954//79 634//433
f 626//425 1946//1417 1952//1422 632//432
f 595//435 1902//1368 1944//1414 623//424
f 743//79 2058//79 2060//1488 745//502
f 751//521 2066//1492 2068//1495 753//522
f 745//502 2060//1488 2066//1492 751//521
f 2112//1533 2113//1532 787//558 786//559
f 787//558 2113//1532 2116//1542 791//555
f 2121//1537 2122//562 795//562 794//561
f 2116//1542 2121//1537 794//561 791//555
f 753//522 2068//1495 2112//1533 786//559
f 634//433 1954//79 2058//79 743//79
f 1107//591 1108//808 2212//1614 2211//591
f 1114//814 1115//813 2219//1616 2218//1615
f 1114//814 2218//1615 2217//1635 1111//812
f 1123//821 2231//1621 2228//1624 1121//822
f 1108//808 1111//812 2217//1635 2212//1614
f 1121//822 2228//1624 2219//1616 1115//813
f 1216//653 2263//653 2261//1652 1214//882
f 1224//888 2271//1657 2269//1659 1222//889
f 1222//889 2269//1659 2263//653 1216//653
f 2305//1689 2306//1690 1256//905 1255//908
f 1250//897 2299//1678 2297//1681 1246//900
f 2311//1694 2312//1693 1262//915 1261//914
f 2306//1690 2311//1694 1261//914 1256//905
f 1262//915 2312//1693 2299//1678 1250//897
f 1246//900 2297//1681 2271//1657 1224//888
f 1214//882 2261//1652 2231//1621 1123//821
f 1401//979 1402//978 2496//1835 2495//1834
f 1408//985 1409//1008 2501//1837 2500//1836
f 1402//978 1408//985 2500//1836 2496//1835
f 1435//999 2538//1877 2536//1880 1433//996
f 1443//1005 2546//653 2544//1886 1441//1006
f 1441//1006 2544//1886 2538//1877 1435//999
f 1433//996 2536//1880 2501//1837 1409//1008
f 1554//1075 2652//1950 2650//653 1552//653
f 1562//1095 2660//1955 2658//1958 1560//1096
f 1560//1096 2658//1958 2652//1950 1554//1075
f 2708//1128 2709//1996 1597//1129 1596//1128
f 2710//2000 2711//1999 1600//1135 1599//1136
f 1603//1131 2714//2005 2710//2000 1599//1136
f 2709//1996 2714//2005 1603//1131 1597//1129
f 1600//1135 2711//1999 2660//1955 1562//1095
f 1552//653 2650//653 2546//653 1443//1005
f 6//8 8//7 812//576 810//575
f 14//13 16//13 820//583 818//583
f 8//7 14//13 818//583 812//576
f 25//22 826//588 828//591 27//23
f 36//23 839//591 841//591 38//30
f 837//591 839//591 36//23 34//23
f 27//23 828//591 837//591 34//23
f 6//8 810//575 826//588 25//22
f 59//30 860//591 862//591 61//30
f 70//30 873//591 875//591 72//30
f 871//591 873//591 70//30 68//30
f 61//30 862//591 871//591 68//30
f 857//591 860//591 59//30 50//30
f 76//30 882//591 884//591 78//30
f 72//30 875//591 882//591 76//30
f 38//30 841//591 857//591 50//30
f 84//13 86//13 890//583 888//583
f 92//13 94//13 898//583 896//583
f 86//13 92//13 896//583 890//583
f 116//89 118//88 922//656 920//655
f 118//88 121//91 928//663 922//656
f 138//106 942//674 940//677 136//107
f 138//106 140//110 944//678 942//674
f 152//119 953//684 951//687 150//120
f 150//120 951//687 944//678 140//110
f 136//107 940//677 928//663 121//91
f 94//13 116//89 920//655 898//583
f 186//23 987//591 989//591 188//23
f 989//591 991//591 190//23 188//23
f 177//30 979//591 987//591 186//23
f 239//23 1044//591 1046//591 241//23
f 258//30 1059//591 1061//591 260//30
f 249//30 1051//591 1059//591 258//30
f 1046//591 1051//591 249//30 241//23
f 269//30 1072//591 1074//591 271//30
f 1070//591 1072//591 269//30 267//30
f 271//30 1074//591 1081//591 274//30
f 304//30 1105//591 1107//591 306//23
f 260//30 1061//591 1070//591 267//30
f 1081//591 1105//591 304//30 274//30
f 321//253 1126//825 1124//825 319//253
f 334//263 1135//828 1133//825 332//253
f 330//253 332//253 1133//825 1131//825
f 330//253 1131//825 1126//825 321//253
f 353//280 1160//852 1158//855 351//281
f 361//292 363//291 1165//857 1163//856
f 361//292 1163//856 1160//852 353//280
f 342//294 351//281 1158//855 1144//866
f 371//13 373//13 1175//583 1173//583
f 381//13 383//13 1185//583 1183//583
f 373//13 381//13 1183//583 1175//583
f 342//294 1144//866 1135//828 334//263
f 363//291 371//13 1173//583 1165//857
f 1255//908 1257//907 456//339 454//338
f 190//23 991//591 1044//591 239//23
f 214//253 319//253 1124//825 1016//825
f 461//345 1266//917 1268//920 463//346
f 472//345 1273//917 1275//917 474//346
f 472//345 476//345 1277//917 1273//917
f 463//346 1268//920 1277//917 476//345
f 482//368 484//367 1288//935 1286//934
f 490//13 492//13 1296//583 1294//583
f 484//367 490//13 1294//583 1288//935
f 482//368 1286//934 1302//957 500//385
f 461//345 500//385 1302//957 1266//917
f 520//13 522//13 1324//583 1322//583
f 530//13 532//13 1334//583 1332//583
f 522//13 530//13 1332//583 1324//583
f 540//13 542//13 1344//583 1342//583
f 553//395 555//394 1357//960 1355//959
f 545//397 1352//969 1357//960 555//394
f 542//13 553//395 1355//959 1344//583
f 532//13 540//13 1342//583 1334//583
f 1385//973 1387//973 585//401 583//401
f 1399//980 1401//979 600//411 598//410
f 1387//973 1399//980 598//410 585//401
f 639//346 1444//920 1446//1011 641//437
f 648//444 1451//1012 1453//1015 650//445
f 648//444 652//448 1455//1016 1451//1012
f 641//437 1446//1011 1455//1016 652//448
f 639//346 661//345 1463//917 1444//920
f 674//473 1475//1038 1477//1041 676//345
f 650//445 1453//1015 1475//1038 674//473
f 779//546 1580//1112 1578//1115 777//547
f 795//562 1596//1128 1594//1128 793//562
f 804//562 1607//1128 1605//1128 802//562
f 1605//1128 1609//1128 806//562 802//562
f 809//562 1616//1128 1607//1128 804//562
f 1594//1128 1616//1128 809//562 793//562
f 806//562 1609//1128 1580//1112 779//546
f 545//397 676//345 1477//1041 1352//969
f 214//253 1016//825 953//684 152//119
f 474//346 1275//917 1463//917 661//345
f 383//13 520//13 1322//583 1185//583
f 1257//907 1385//973 583//401 456//339
f 16//13 84//13 888//583 820//583
f 884//591 979//591 177//30 78//30
f 1627//23 2213//591 2215//591 1629//23
f 2211//591 2213//591 1627//23 1625//23
f 1633//23 2222//591 2224//591 1635//23
f 1629//23 2215//591 2222//591 1633//23
f 2224//591 2233//591 1648//30 1635//23
f 1657//30 2241//591 2243//591 1659//30
f 2243//591 2245//591 1661//30 1659//30
f 1666//23 2254//591 2256//591 1668//30
f 1661//30 2245//591 2254//591 1666//23
f 1648//30 2233//591 2241//591 1657//30
f 1724//1230 2309//1686 2307//1686 1722//1230
f 1720//1233 1722//1230 2307//1686 2305//1689
f 1735//1230 2319//1686 2317//1686 1733//1230
f 1733//1230 2317//1686 2309//1686 1724//1230
f 1761//30 2345//591 2347//591 1763//30
f 1772//23 2358//591 2360//591 1774//23
f 2356//591 2358//591 1772//23 1770//30
f 1763//30 2347//591 2356//591 1770//30
f 1795//23 2379//591 2381//591 1797//23
f 1806//30 2392//591 2394//591 1808//30
f 2390//591 2392//591 1806//30 1804//23
f 1797//23 2381//591 2390//591 1804//23
f 2376//591 2379//591 1795//23 1786//23
f 1774//23 2360//591 2376//591 1786//23
f 1696//30 2281//591 2345//591 1761//30
f 2256//591 2281//591 1696//30 1668//30
f 1845//23 2434//591 2436//591 1847//23
f 1864//30 2448//591 2450//591 1866//30
f 2450//591 2452//1800 1868//1343 1866//30
f 1855//30 2440//591 2448//591 1864//30
f 2473//1819 2475//973 1888//401 1886//1358
f 2469//1825 2473//1819 1886//1358 1880//1363
f 1868//1343 2452//1800 2469//1825 1880//1363
f 2436//591 2440//591 1855//30 1847//23
f 1896//1366 2483//1828 2485//1831 1898//1366
f 1907//1376 2491//1828 2493//1828 1909//1366
f 1907//1376 1911//1379 2495//1834 2491//1828
f 1909//1366 2493//1828 2504//1828 1919//1366
f 1896//1366 1919//1366 2504//1828 2483//1828
f 1929//1401 1931//1400 2514//1854 2512//1853
f 1929//1401 2512//1853 2481//1896 1894//1432
f 1898//1366 2485//1831 2514//1854 1931//1400
f 2046//1474 2630//1929 2628//1932 2044//1475
f 2055//562 2641//1128 2639//1128 2053//562
f 2639//1128 2643//1128 2057//562 2053//562
f 2057//562 2643//1128 2630//1929 2046//1474
f 2104//562 2689//1128 2687//1112 2102//546
f 2685//1128 2689//1128 2104//562 2100//562
f 2111//562 2699//1128 2697//1128 2109//562
f 2109//562 2697//1128 2685//1128 2100//562
f 2677//1128 2699//1128 2111//562 2092//562
f 2120//1535 2706//1993 2704//1128 2118//562
f 2704//1128 2708//1128 2122//562 2118//562
f 2127//1539 2717//2001 2715//2004 2125//1540
f 2125//1540 2715//2004 2706//1993 2120//1535
f 2102//546 2687//1112 2664//2007 2080//1544
f 2664//2007 2717//2001 2127//1539 2080//1544
f 2140//562 2724//1128 2722//1128 2138//562
f 2720//1128 2724//1128 2140//562 2136//562
f 2147//1556 2735//2018 2733//2021 2145//1557
f 2145//1557 2733//2021 2720//1128 2136//562
f 2149//1563 2740//2025 2735//2018 2147//1556
f 2138//562 2722//1128 2677//1128 2092//562
f 2628//1932 2740//2025 2149//1563 2044//1475
f 2759//973 2761//973 2174//401 2172//401
f 2767//973 2769//2046 2182//1585 2180//401
f 2761//973 2767//973 2180//401 2174//401
f 2193//562 2777//1128 2775//1128 2191//562
f 2202//1602 2788//2060 2786//1128 2200//562
f 2786//1128 2790//1128 2204//562 2200//562
f 2204//562 2790//1128 2777//1128 2193//562
f 2775//1128 2797//1128 2207//562 2191//562
f 2210//1609 2800//2073 2788//2060 2202//1602
f 2769//2046 2800//2073 2210//1609 2182//1585
f 1808//30 2394//591 2434//591 1845//23
f 2207//562 2797//1128 2641//1128 2055//562
f 1735//1230 1894//1432 2481//1896 2319//1686
f 2475//973 2759//973 2172//401 1888//401
f 2808//13 2810//13 2946//583 2944//583
f 2816//13 2818//13 2954//583 2952//583
f 2810//13 2816//13 2952//583 2946//583
f 2841//13 2843//2094 2979//2195 2977//583
f 2843//2094 2846//2096 2985//2202 2979//2195
f 2857//562 2990//1128 2988//1128 2855//562
f 2866//2112 3001//2214 2999//1128 2864//562
f 2999//1128 3003//1128 2868//562 2864//562
f 2868//562 3003//1128 2990//1128 2857//562
f 2988//1128 3010//2223 2871//2115 2855//562
f 2871//2115 3010//2223 2985//2202 2846//2096
f 2818//13 2841//13 2977//583 2954//583
f 2901//562 3035//1128 3033//2244 2899//2142
f 3031//1128 3035//1128 2901//562 2897//562
f 2899//2142 3033//2244 3022//2253 2889//2144
f 2922//562 3055//1128 3053//1128 2920//562
f 3051//1128 3055//1128 2922//562 2918//562
f 2929//562 3066//1128 3064//1128 2927//562
f 2920//562 3053//1128 3043//1128 2909//562
f 3043//1128 3066//1128 2929//562 2909//562
f 2934//2170 3073//2277 3071//2280 2932//2171
f 2927//562 3064//1128 3031//1128 2897//562
f 3022//2253 3073//2277 2934//2170 2889//2144
f 2941//2175 3078//2282 3076//2214 2939//2112
f 2943//2178 3083//2285 3078//2282 2941//2175
f 2939//2112 3076//2214 3051//1128 2918//562
f 2932//2171 3071//2280 3001//2214 2866//2112
f 306//23 1107//591 2211//591 1625//23
f 1720//1233 2305//1689 1255//908 454//338
f 600//411 1401//979 2495//1834 1911//1379
f 2122//562 2708//1128 1596//1128 795//562
f 492//13 2808//13 2944//583 1296//583
f 1578//1115 3083//2285 2943//2178 777//547
