# Supplementary material
Source: ML conference proceedings conference paper supplement (https://openaccess.thecvf.com/content/WACV2023/html/Plack_Fast_Differentiable_Transient_WACV_2023_paper.html)
Supplement: Supplementary file 2 [file Plack_Fast_Differentiable_Transient_WACV_2023_supplemental.zip › code/samples/wacv/self_supervised/c.obj]

# Blender v3.2.1 OBJ File: 'untitled.blend'
# www.blender.org
v 0.160229 -0.211565 0.348869
v 0.162886 -0.213767 0.341705
v 0.149341 -0.225947 0.338876
v 0.153036 -0.214331 0.350601
v 0.153440 -0.220781 0.342628
v 0.165606 -0.216021 0.328603
v 0.165989 -0.216339 0.315500
v 0.151151 -0.227137 0.328603
v 0.151534 -0.227422 0.315500
v 0.157703 -0.222573 0.328603
v 0.158085 -0.222890 0.315500
v 0.133458 -0.237282 0.335347
v 0.120836 -0.237568 0.348681
v 0.125855 -0.239049 0.340511
v 0.133973 -0.237589 0.328603
v 0.134450 -0.237873 0.315500
v 0.126832 -0.241840 0.328603
v 0.126832 -0.242408 0.315500
v 0.136907 -0.226233 0.349839
v 0.139550 -0.230458 0.341479
v 0.140738 -0.218593 0.352598
v 0.145642 -0.223633 0.347611
v 0.125855 -0.230635 0.351163
v 0.129571 -0.234968 0.344082
v 0.126832 -0.217584 0.356517
v 0.140524 -0.233689 0.328603
v 0.141001 -0.233973 0.315500
v 0.107677 -0.250538 0.336080
v 0.113729 -0.239305 0.349989
v 0.112718 -0.245719 0.340950
v 0.100627 -0.251940 0.338910
v 0.100627 -0.242179 0.351772
v 0.100627 -0.248730 0.345461
v 0.108588 -0.250900 0.328603
v 0.109250 -0.251163 0.315500
v 0.115139 -0.248040 0.328603
v 0.115801 -0.248324 0.315500
v 0.100627 -0.254065 0.328603
v 0.100627 -0.254591 0.315500
v 0.113729 -0.230686 0.354577
v 0.113729 -0.217584 0.358028
v 0.100627 -0.230686 0.356825
v 0.100627 -0.217584 0.358493
v 0.198988 -0.184932 0.325130
v 0.199034 -0.184984 0.315500
v 0.214192 -0.161904 0.339276
v 0.199792 -0.172729 0.349082
v 0.202242 -0.175465 0.341705
v 0.202696 -0.165175 0.350897
v 0.209316 -0.165833 0.342868
v 0.215583 -0.163984 0.328603
v 0.215878 -0.164423 0.315500
v 0.203491 -0.179357 0.329140
v 0.205038 -0.178277 0.315500
v 0.211122 -0.170535 0.328603
v 0.211450 -0.170975 0.315500
v 0.225849 -0.146642 0.337478
v 0.226133 -0.134332 0.349255
v 0.228119 -0.138807 0.341789
v 0.226518 -0.147642 0.328603
v 0.226812 -0.148081 0.315500
v 0.231664 -0.138970 0.328603
v 0.232231 -0.138970 0.315500
v 0.239228 -0.121407 0.337925
v 0.239158 -0.108162 0.349209
v 0.241272 -0.112624 0.342057
v 0.228259 -0.125868 0.350719
v 0.234818 -0.125812 0.342057
v 0.232247 -0.112624 0.351989
v 0.237013 -0.116897 0.346659
v 0.240013 -0.123006 0.328603
v 0.240286 -0.123560 0.315500
v 0.244973 -0.112765 0.328603
v 0.245503 -0.112765 0.315500
v 0.236796 -0.129557 0.328603
v 0.237069 -0.130112 0.315500
v 0.214722 -0.149595 0.350148
v 0.218825 -0.152486 0.342745
v 0.218873 -0.138807 0.351771
v 0.223457 -0.143067 0.346213
v 0.206638 -0.153206 0.352932
v 0.211800 -0.158329 0.348011
v 0.205446 -0.138970 0.356897
v 0.222135 -0.154193 0.328603
v 0.222429 -0.154633 0.315500
v 0.218548 -0.125868 0.355480
v 0.218548 -0.112765 0.357336
v 0.205446 -0.125868 0.358201
v 0.205446 -0.112765 0.358568
v 0.251558 -0.093857 0.336362
v 0.252800 -0.086561 0.338954
v 0.251942 -0.094987 0.328603
v 0.252201 -0.095745 0.315500
v 0.254812 -0.086561 0.328603
v 0.255328 -0.086561 0.315500
v 0.252191 -0.070221 0.349216
v 0.254631 -0.074137 0.342710
v 0.253303 -0.060356 0.350133
v 0.258345 -0.060356 0.341705
v 0.258797 -0.073458 0.328603
v 0.259304 -0.073458 0.315500
v 0.261886 -0.060356 0.328603
v 0.262385 -0.060356 0.315500
v 0.264735 -0.042317 0.336774
v 0.265129 -0.034151 0.338123
v 0.254638 -0.047254 0.351007
v 0.261496 -0.046912 0.341367
v 0.255561 -0.034151 0.351638
v 0.262112 -0.034151 0.344674
v 0.265145 -0.044347 0.328603
v 0.265391 -0.045571 0.315500
v 0.266342 -0.034151 0.328603
v 0.266832 -0.034151 0.315500
v 0.263814 -0.050899 0.328603
v 0.264063 -0.052123 0.315500
v 0.265586 -0.021049 0.339004
v 0.265797 -0.007947 0.339318
v 0.256046 -0.021049 0.351985
v 0.262597 -0.021049 0.345555
v 0.256257 -0.007947 0.352125
v 0.262808 -0.007947 0.345869
v 0.267257 -0.021049 0.328603
v 0.267747 -0.021049 0.315500
v 0.267677 -0.007947 0.328603
v 0.268167 -0.007947 0.315500
v 0.240810 -0.099663 0.350450
v 0.247410 -0.098800 0.341119
v 0.243099 -0.086561 0.351827
v 0.249650 -0.086561 0.345505
v 0.231650 -0.099663 0.355187
v 0.231650 -0.086561 0.356917
v 0.249712 -0.101539 0.328603
v 0.249970 -0.102296 0.315500
v 0.245848 -0.074137 0.352340
v 0.250945 -0.078956 0.347748
v 0.244753 -0.060356 0.354850
v 0.231650 -0.073458 0.357824
v 0.231650 -0.060356 0.358157
v 0.218548 -0.099663 0.358176
v 0.218548 -0.086561 0.358530
v 0.205446 -0.099663 0.358623
v 0.205446 -0.086561 0.358623
v 0.218548 -0.073458 0.358623
v 0.218548 -0.060356 0.358623
v 0.205446 -0.073458 0.358623
v 0.205446 -0.060356 0.358623
v 0.244753 -0.047254 0.355985
v 0.244753 -0.034151 0.356784
v 0.231650 -0.047254 0.358417
v 0.231650 -0.034151 0.358586
v 0.244753 -0.021049 0.357168
v 0.244753 -0.007947 0.357309
v 0.231650 -0.021049 0.358623
v 0.231650 -0.007947 0.358623
v 0.218548 -0.047254 0.358623
v 0.218548 -0.034151 0.358623
v 0.205446 -0.047254 0.358623
v 0.205446 -0.034151 0.358623
v 0.218548 -0.021049 0.358623
v 0.218548 -0.007947 0.358623
v 0.205446 -0.021049 0.358623
v 0.205446 -0.007947 0.358623
v 0.185906 -0.198058 0.335579
v 0.187147 -0.186342 0.349310
v 0.189088 -0.190978 0.340650
v 0.174233 -0.199210 0.349293
v 0.178857 -0.201091 0.340650
v 0.178857 -0.190978 0.351240
v 0.182968 -0.195077 0.344314
v 0.186291 -0.198488 0.328603
v 0.186619 -0.198854 0.315500
v 0.193846 -0.190131 0.329140
v 0.193170 -0.191536 0.315500
v 0.179241 -0.204597 0.328603
v 0.179241 -0.205281 0.315500
v 0.191846 -0.177568 0.351072
v 0.196377 -0.182016 0.341705
v 0.192343 -0.165175 0.355552
v 0.179241 -0.178277 0.355910
v 0.179241 -0.165175 0.358095
v 0.198550 -0.184444 0.333865
v 0.165213 -0.203939 0.350916
v 0.169437 -0.208337 0.341705
v 0.166139 -0.191379 0.355873
v 0.153036 -0.204482 0.355193
v 0.153036 -0.191379 0.358030
v 0.172157 -0.210591 0.328603
v 0.172540 -0.210909 0.315500
v 0.166139 -0.178277 0.358191
v 0.166139 -0.165175 0.358623
v 0.153036 -0.178277 0.358622
v 0.153036 -0.165175 0.358623
v 0.192343 -0.152072 0.357819
v 0.192343 -0.138970 0.358436
v 0.179241 -0.152072 0.358577
v 0.179241 -0.138970 0.358623
v 0.192343 -0.125868 0.358623
v 0.192343 -0.112765 0.358623
v 0.179241 -0.125868 0.358623
v 0.179241 -0.112765 0.358623
v 0.166139 -0.152072 0.358623
v 0.166139 -0.138970 0.358623
v 0.153036 -0.152072 0.358623
v 0.153036 -0.138970 0.358623
v 0.166139 -0.125868 0.358623
v 0.166139 -0.112765 0.358623
v 0.153036 -0.125868 0.358623
v 0.153036 -0.112765 0.358623
v 0.139934 -0.204482 0.357592
v 0.139934 -0.191379 0.358536
v 0.126832 -0.204482 0.358386
v 0.126832 -0.191379 0.358623
v 0.139934 -0.178277 0.358623
v 0.139934 -0.165175 0.358623
v 0.126832 -0.178277 0.358623
v 0.126832 -0.165175 0.358623
v 0.113729 -0.204482 0.358623
v 0.113729 -0.191379 0.358623
v 0.100627 -0.204482 0.358623
v 0.100627 -0.191379 0.358623
v 0.113729 -0.178277 0.358623
v 0.113729 -0.165175 0.358623
v 0.100627 -0.178277 0.358623
v 0.100627 -0.165175 0.358623
v 0.139934 -0.152072 0.358623
v 0.139934 -0.138970 0.358623
v 0.126832 -0.152072 0.358623
v 0.126832 -0.138970 0.358623
v 0.139934 -0.125868 0.358623
v 0.139934 -0.112765 0.358430
v 0.126832 -0.125868 0.358317
v 0.126832 -0.112765 0.357022
v 0.113729 -0.152072 0.358623
v 0.113729 -0.138970 0.358325
v 0.100627 -0.152072 0.358425
v 0.100627 -0.138970 0.356931
v 0.113729 -0.125868 0.356696
v 0.113207 -0.112455 0.352293
v 0.108492 -0.107881 0.346705
v 0.100215 -0.125403 0.352224
v 0.095573 -0.120726 0.346720
v 0.104308 -0.116616 0.349949
v 0.100773 -0.112939 0.342345
v 0.098508 -0.110449 0.328603
v 0.098199 -0.110114 0.315500
v 0.192343 -0.099663 0.358623
v 0.192343 -0.086561 0.358623
v 0.179241 -0.099663 0.358623
v 0.179241 -0.086561 0.358623
v 0.192343 -0.073458 0.358623
v 0.192343 -0.060356 0.358623
v 0.179241 -0.073458 0.358623
v 0.179241 -0.060356 0.358623
v 0.166139 -0.099663 0.358623
v 0.166139 -0.086561 0.358623
v 0.153036 -0.099663 0.358623
v 0.153036 -0.086561 0.358338
v 0.166139 -0.073458 0.358623
v 0.166139 -0.060356 0.358520
v 0.153036 -0.073458 0.357825
v 0.153036 -0.060356 0.356798
v 0.192343 -0.047254 0.358623
v 0.192343 -0.034151 0.358623
v 0.179241 -0.047254 0.358623
v 0.179241 -0.034151 0.358623
v 0.192343 -0.021049 0.358623
v 0.192343 -0.007947 0.358623
v 0.179241 -0.021049 0.358623
v 0.179241 -0.007947 0.358623
v 0.166139 -0.047254 0.358282
v 0.166139 -0.034151 0.358028
v 0.153036 -0.047254 0.355406
v 0.153036 -0.034151 0.354217
v 0.166139 -0.021049 0.357865
v 0.166139 -0.007947 0.357782
v 0.153036 -0.021049 0.353246
v 0.151820 -0.008328 0.351824
v 0.146641 -0.004214 0.348023
v 0.139934 -0.099663 0.357890
v 0.139934 -0.086561 0.356195
v 0.125718 -0.098623 0.353009
v 0.120608 -0.093562 0.347842
v 0.129146 -0.086561 0.351297
v 0.122422 -0.085772 0.342766
v 0.120726 -0.080810 0.328603
v 0.120446 -0.080307 0.315500
v 0.138867 -0.072804 0.352556
v 0.133789 -0.068000 0.347686
v 0.141760 -0.060356 0.351718
v 0.135209 -0.060356 0.344878
v 0.131774 -0.076735 0.349575
v 0.129058 -0.072804 0.342673
v 0.132028 -0.060356 0.338327
v 0.124445 -0.073458 0.328603
v 0.123904 -0.073458 0.315500
v 0.130152 -0.060356 0.328603
v 0.129631 -0.060356 0.315500
v 0.117227 -0.102297 0.350244
v 0.113302 -0.099114 0.342906
v 0.118111 -0.089613 0.339107
v 0.105972 -0.104667 0.337970
v 0.110166 -0.096945 0.328603
v 0.109856 -0.096547 0.315500
v 0.116717 -0.087361 0.328603
v 0.116407 -0.086858 0.315500
v 0.105059 -0.103496 0.328603
v 0.104750 -0.103099 0.315500
v 0.143751 -0.047254 0.350564
v 0.137053 -0.048415 0.340654
v 0.145205 -0.034151 0.349628
v 0.140888 -0.034151 0.341705
v 0.133291 -0.053558 0.335586
v 0.134675 -0.046182 0.328603
v 0.134426 -0.045480 0.315500
v 0.137353 -0.034151 0.328603
v 0.136853 -0.034151 0.315500
v 0.132985 -0.052733 0.328603
v 0.132724 -0.052031 0.315500
v 0.146107 -0.021049 0.348820
v 0.142722 -0.021049 0.341705
v 0.146381 -0.012949 0.348412
v 0.144062 -0.008328 0.342875
v 0.139220 -0.021049 0.328603
v 0.138726 -0.021049 0.315500
v 0.140093 -0.007947 0.328603
v 0.139604 -0.007947 0.315500
v 0.070348 -0.263999 0.337359
v 0.072351 -0.264528 0.328603
v 0.073116 -0.264779 0.315500
v 0.061320 -0.265014 0.339537
v 0.043819 -0.263926 0.348951
v 0.048199 -0.266169 0.342579
v 0.061320 -0.267088 0.328603
v 0.061320 -0.267589 0.315500
v 0.048218 -0.270034 0.328603
v 0.048218 -0.270536 0.315500
v 0.084824 -0.251871 0.349586
v 0.088525 -0.254621 0.342844
v 0.088525 -0.244976 0.352610
v 0.093559 -0.250135 0.347971
v 0.074422 -0.253653 0.350948
v 0.074598 -0.260434 0.341718
v 0.074422 -0.243789 0.355873
v 0.087525 -0.259273 0.328603
v 0.087525 -0.259799 0.315500
v 0.078902 -0.262659 0.328603
v 0.079667 -0.262923 0.315500
v 0.087525 -0.230686 0.357885
v 0.087525 -0.217584 0.358623
v 0.074422 -0.230686 0.358364
v 0.074422 -0.217584 0.358623
v 0.061320 -0.255407 0.352040
v 0.061320 -0.261958 0.346088
v 0.061320 -0.243789 0.357213
v 0.048199 -0.257902 0.352129
v 0.052554 -0.262944 0.347528
v 0.048218 -0.243789 0.357760
v 0.061320 -0.230686 0.358613
v 0.061320 -0.217584 0.358623
v 0.048218 -0.230686 0.358623
v 0.048218 -0.217584 0.358623
v 0.035115 -0.264881 0.349778
v 0.035115 -0.269343 0.341705
v 0.022013 -0.265826 0.350413
v 0.022013 -0.271199 0.341705
v 0.035115 -0.272860 0.328603
v 0.035115 -0.273356 0.315500
v 0.022013 -0.274677 0.328603
v 0.022013 -0.275167 0.315500
v 0.008911 -0.266290 0.350722
v 0.008911 -0.272127 0.341705
v -0.004192 -0.266754 0.351032
v -0.004192 -0.273055 0.341705
v 0.002431 -0.276550 0.324807
v 0.002467 -0.276552 0.315500
v 0.007643 -0.275790 0.328946
v 0.009018 -0.276088 0.315500
v -0.004192 -0.276784 0.327348
v -0.004192 -0.277024 0.315500
v -0.004192 -0.276294 0.333899
v 0.035115 -0.256891 0.354384
v 0.035115 -0.243789 0.358046
v 0.022013 -0.256891 0.355223
v 0.022013 -0.243789 0.358249
v 0.035115 -0.230686 0.358624
v 0.035115 -0.217584 0.358624
v 0.022013 -0.230686 0.358624
v 0.022013 -0.217584 0.358624
v 0.008911 -0.256891 0.355638
v 0.008911 -0.243789 0.358356
v -0.004192 -0.256891 0.356039
v -0.004192 -0.243789 0.358448
v 0.008911 -0.230686 0.358624
v 0.008911 -0.217584 0.358624
v -0.004192 -0.230686 0.358624
v -0.004192 -0.217584 0.358624
v -0.019648 -0.276733 0.336099
v -0.017294 -0.267139 0.351291
v -0.016086 -0.274254 0.340961
v -0.030396 -0.276756 0.336218
v -0.030396 -0.267222 0.351349
v -0.030396 -0.273774 0.342769
v -0.016086 -0.277154 0.329877
v -0.017294 -0.277787 0.315500
v -0.010913 -0.276533 0.335093
v -0.030396 -0.277457 0.328603
v -0.030396 -0.277946 0.315500
v -0.039574 -0.276639 0.335628
v -0.043499 -0.266992 0.351193
v -0.043764 -0.274074 0.340679
v -0.056601 -0.266601 0.350926
v -0.056601 -0.272754 0.341705
v -0.043764 -0.276980 0.329565
v -0.043499 -0.277491 0.315500
v -0.048309 -0.276429 0.334574
v -0.053224 -0.276755 0.325839
v -0.054811 -0.276861 0.315500
v -0.057195 -0.276174 0.329565
v -0.061362 -0.276414 0.315500
v -0.017294 -0.256891 0.356378
v -0.017294 -0.243789 0.358527
v -0.030396 -0.256891 0.356455
v -0.030396 -0.243789 0.358545
v -0.017294 -0.230686 0.358624
v -0.017294 -0.217584 0.358624
v -0.030396 -0.230686 0.358624
v -0.030396 -0.217584 0.358624
v -0.043499 -0.256891 0.356251
v -0.043499 -0.243789 0.358497
v -0.056601 -0.256891 0.355900
v -0.056601 -0.243789 0.358414
v -0.043499 -0.230686 0.358624
v -0.043499 -0.217584 0.358624
v -0.056601 -0.230686 0.358624
v -0.056601 -0.217584 0.358624
v -0.069704 -0.265997 0.350520
v -0.069704 -0.271553 0.341705
v -0.082806 -0.265150 0.349955
v -0.082806 -0.269868 0.341705
v -0.069704 -0.275046 0.328603
v -0.069704 -0.275538 0.315500
v -0.082806 -0.273373 0.328603
v -0.082806 -0.273866 0.315500
v -0.095908 -0.264099 0.349006
v -0.095908 -0.267791 0.341705
v -0.102711 -0.263496 0.348335
v -0.107851 -0.265418 0.342242
v -0.095908 -0.271324 0.328603
v -0.095908 -0.271821 0.315500
v -0.109011 -0.268802 0.328603
v -0.109011 -0.269302 0.315500
v -0.069704 -0.256891 0.355371
v -0.069704 -0.243789 0.358290
v -0.082806 -0.256891 0.354633
v -0.082806 -0.243789 0.358118
v -0.069704 -0.230686 0.358624
v -0.069704 -0.217584 0.358624
v -0.082806 -0.230686 0.358624
v -0.082806 -0.217584 0.358624
v -0.095908 -0.256891 0.353465
v -0.095908 -0.243789 0.357899
v -0.107851 -0.257674 0.351624
v -0.111446 -0.262562 0.346968
v -0.109011 -0.243789 0.357590
v -0.095908 -0.230686 0.358624
v -0.095908 -0.217584 0.358624
v -0.109011 -0.230686 0.358624
v -0.109011 -0.217584 0.358624
v 0.087525 -0.204482 0.358623
v 0.087525 -0.191379 0.358623
v 0.074422 -0.204482 0.358623
v 0.074422 -0.191379 0.358623
v 0.087525 -0.178277 0.358623
v 0.087525 -0.165175 0.358606
v 0.074422 -0.178277 0.358623
v 0.074422 -0.165175 0.358299
v 0.061320 -0.204482 0.358623
v 0.061320 -0.191379 0.358623
v 0.048218 -0.204482 0.358623
v 0.048218 -0.191379 0.358623
v 0.061320 -0.178277 0.358623
v 0.061320 -0.165175 0.357598
v 0.048218 -0.178277 0.358441
v 0.048218 -0.165175 0.356305
v 0.087525 -0.152072 0.357771
v 0.086488 -0.137848 0.352853
v 0.081429 -0.132733 0.347869
v 0.074422 -0.152072 0.355947
v 0.074422 -0.141495 0.351088
v 0.073905 -0.134941 0.342783
v 0.069423 -0.133401 0.328603
v 0.068993 -0.133129 0.315500
v 0.090164 -0.129461 0.350119
v 0.087051 -0.125522 0.342927
v 0.092672 -0.117996 0.337985
v 0.077927 -0.130318 0.339134
v 0.085062 -0.122419 0.328603
v 0.084705 -0.122123 0.315500
v 0.091614 -0.117001 0.328603
v 0.091257 -0.116665 0.315500
v 0.075974 -0.128971 0.328603
v 0.075544 -0.128674 0.315500
v 0.061027 -0.151263 0.352283
v 0.056465 -0.146356 0.347135
v 0.065199 -0.144206 0.349424
v 0.061027 -0.141785 0.342342
v 0.048218 -0.154570 0.351304
v 0.047643 -0.147761 0.342342
v 0.051627 -0.144140 0.338400
v 0.061320 -0.137609 0.328603
v 0.061320 -0.137064 0.315500
v 0.042723 -0.145868 0.328603
v 0.041940 -0.145611 0.315500
v 0.049274 -0.143178 0.328603
v 0.048492 -0.142906 0.315500
v 0.035115 -0.204482 0.358624
v 0.035115 -0.191379 0.358624
v 0.022013 -0.204482 0.358624
v 0.022013 -0.191379 0.358624
v 0.035115 -0.178277 0.358068
v 0.035115 -0.165175 0.354525
v 0.022013 -0.178277 0.357756
v 0.022177 -0.164140 0.352082
v 0.017919 -0.159082 0.347581
v 0.008911 -0.204482 0.358624
v 0.008911 -0.191379 0.358624
v -0.004192 -0.204482 0.358624
v -0.004192 -0.191379 0.358620
v 0.008911 -0.178277 0.357345
v 0.008911 -0.166475 0.352162
v 0.008911 -0.159924 0.346343
v -0.004192 -0.178277 0.356912
v -0.004192 -0.167331 0.351732
v -0.004192 -0.160780 0.345046
v 0.035115 -0.156892 0.349897
v 0.035115 -0.152021 0.341705
v 0.026654 -0.158187 0.348877
v 0.022177 -0.155906 0.342610
v 0.035115 -0.148368 0.328603
v 0.035115 -0.147854 0.315500
v 0.022013 -0.151979 0.328603
v 0.022013 -0.151473 0.315500
v 0.008911 -0.156890 0.339792
v -0.004192 -0.157769 0.338495
v 0.008911 -0.154660 0.328603
v 0.008911 -0.154163 0.315500
v -0.004192 -0.156421 0.328603
v -0.004192 -0.155928 0.315500
v -0.017294 -0.204482 0.358624
v -0.017294 -0.191379 0.358577
v -0.030396 -0.204482 0.358624
v -0.030396 -0.191379 0.358543
v -0.017294 -0.178277 0.356600
v -0.017294 -0.167770 0.351463
v -0.017294 -0.161219 0.343670
v -0.030396 -0.178277 0.356448
v -0.030396 -0.167949 0.351345
v -0.030396 -0.161398 0.342767
v -0.043499 -0.204482 0.358624
v -0.043499 -0.191379 0.358585
v -0.056601 -0.204482 0.358624
v -0.056601 -0.191379 0.358624
v -0.043499 -0.178277 0.356659
v -0.043499 -0.167691 0.351513
v -0.043499 -0.161140 0.343854
v -0.056601 -0.178277 0.357123
v -0.056601 -0.167026 0.351939
v -0.056601 -0.160475 0.345504
v -0.017294 -0.158231 0.337119
v -0.030396 -0.158412 0.336216
v -0.017294 -0.157349 0.328603
v -0.017294 -0.156859 0.315500
v -0.030396 -0.157711 0.328603
v -0.030396 -0.157221 0.315500
v -0.043499 -0.158151 0.337303
v -0.056601 -0.157469 0.338953
v -0.043499 -0.157188 0.328603
v -0.043499 -0.156699 0.315500
v -0.056601 -0.155823 0.328603
v -0.056601 -0.155330 0.315500
v -0.069704 -0.204482 0.358624
v -0.069704 -0.191379 0.358624
v -0.082806 -0.204482 0.358624
v -0.082806 -0.191379 0.358624
v -0.069704 -0.178277 0.357557
v -0.069704 -0.166002 0.352373
v -0.069704 -0.159451 0.347034
v -0.082806 -0.178277 0.357862
v -0.081928 -0.163955 0.352360
v -0.076976 -0.158775 0.348035
v -0.095908 -0.204482 0.358624
v -0.095908 -0.191379 0.358624
v -0.109011 -0.204482 0.358624
v -0.109011 -0.191379 0.358624
v -0.095908 -0.178277 0.358170
v -0.095908 -0.165175 0.354991
v -0.109011 -0.178277 0.358481
v -0.109011 -0.165175 0.356564
v -0.069704 -0.156419 0.340483
v -0.085711 -0.157748 0.349200
v -0.081928 -0.155211 0.342882
v -0.069704 -0.153718 0.328603
v -0.069704 -0.153221 0.315500
v -0.082806 -0.150902 0.328603
v -0.082806 -0.150399 0.315500
v -0.095908 -0.156374 0.350261
v -0.095908 -0.151014 0.341705
v -0.109011 -0.154336 0.351523
v -0.107987 -0.147424 0.342365
v -0.111672 -0.144169 0.338437
v -0.096868 -0.147133 0.329471
v -0.095033 -0.147167 0.315500
v -0.101876 -0.145333 0.325682
v -0.101584 -0.145238 0.315500
v -0.102937 -0.145676 0.334416
v -0.107987 -0.143577 0.329471
v -0.109011 -0.142688 0.315500
v -0.122113 -0.264331 0.337581
v -0.128785 -0.263475 0.335310
v -0.122113 -0.265723 0.328603
v -0.122113 -0.266225 0.315500
v -0.129798 -0.263743 0.328603
v -0.130751 -0.263996 0.315500
v -0.122113 -0.254713 0.351655
v -0.122113 -0.261264 0.344132
v -0.122113 -0.243789 0.356737
v -0.135215 -0.252870 0.350451
v -0.133978 -0.259475 0.340489
v -0.135215 -0.243789 0.355234
v -0.136349 -0.261822 0.328603
v -0.137302 -0.262078 0.315500
v -0.122113 -0.230686 0.358522
v -0.122113 -0.217584 0.358624
v -0.135215 -0.230686 0.358223
v -0.135215 -0.217584 0.358624
v -0.144886 -0.251371 0.349292
v -0.148880 -0.253824 0.342628
v -0.148880 -0.244824 0.352370
v -0.153621 -0.249881 0.347611
v -0.161420 -0.251599 0.338016
v -0.161420 -0.241844 0.351646
v -0.161420 -0.248395 0.344567
v -0.148318 -0.258019 0.328603
v -0.148318 -0.258536 0.315500
v -0.161420 -0.253383 0.328603
v -0.161420 -0.253908 0.315500
v -0.148318 -0.230686 0.357805
v -0.148318 -0.217584 0.358624
v -0.161420 -0.230686 0.356672
v -0.161420 -0.217584 0.358466
v -0.168019 -0.250360 0.335247
v -0.174522 -0.239193 0.349954
v -0.173241 -0.245581 0.340451
v -0.181880 -0.237611 0.348763
v -0.186799 -0.239326 0.341673
v -0.168679 -0.250635 0.328603
v -0.169314 -0.250899 0.315500
v -0.175230 -0.247902 0.328603
v -0.175865 -0.248170 0.315500
v -0.187625 -0.242435 0.328603
v -0.187625 -0.242972 0.315500
v -0.174522 -0.230686 0.354555
v -0.174522 -0.217584 0.358041
v -0.186799 -0.230994 0.351487
v -0.190615 -0.235568 0.346019
v -0.187625 -0.217584 0.356974
v -0.195280 -0.237781 0.337284
v -0.196375 -0.238322 0.328603
v -0.196918 -0.238591 0.315500
v -0.200727 -0.226532 0.350247
v -0.200079 -0.232928 0.341673
v -0.200727 -0.217584 0.354736
v -0.208268 -0.224634 0.348923
v -0.213113 -0.226384 0.341651
v -0.210622 -0.217584 0.350778
v -0.217173 -0.217584 0.345541
v -0.202926 -0.235046 0.328603
v -0.203470 -0.235320 0.315500
v -0.213829 -0.229557 0.328603
v -0.213829 -0.230104 0.315500
v -0.221424 -0.224660 0.337248
v -0.221979 -0.217584 0.338990
v -0.222224 -0.225197 0.328603
v -0.222501 -0.225470 0.315500
v -0.224100 -0.217584 0.328603
v -0.224622 -0.217584 0.315500
v -0.122113 -0.204482 0.358624
v -0.122113 -0.191379 0.358624
v -0.135215 -0.204482 0.358624
v -0.135215 -0.191379 0.358624
v -0.122113 -0.178277 0.358624
v -0.122113 -0.165175 0.357667
v -0.135215 -0.178277 0.358624
v -0.135215 -0.165175 0.358206
v -0.148318 -0.204482 0.358624
v -0.148318 -0.191379 0.358624
v -0.161420 -0.204482 0.358624
v -0.161420 -0.191379 0.358624
v -0.148318 -0.178277 0.358624
v -0.148318 -0.165175 0.358540
v -0.161420 -0.178277 0.358624
v -0.161420 -0.165175 0.358624
v -0.122027 -0.151227 0.352201
v -0.117603 -0.146296 0.347172
v -0.126338 -0.144607 0.349195
v -0.122027 -0.142312 0.342365
v -0.135215 -0.152072 0.355306
v -0.135215 -0.142717 0.350540
v -0.135669 -0.136187 0.341774
v -0.122113 -0.138340 0.328603
v -0.122113 -0.137812 0.315500
v -0.132462 -0.134078 0.328603
v -0.131852 -0.133812 0.315500
v -0.140338 -0.131742 0.337453
v -0.139013 -0.131131 0.328603
v -0.138403 -0.130858 0.315500
v -0.148318 -0.152072 0.357128
v -0.148875 -0.138585 0.351724
v -0.144880 -0.133961 0.346188
v -0.161420 -0.152072 0.358121
v -0.161420 -0.138970 0.355108
v -0.153615 -0.131798 0.349007
v -0.148875 -0.129917 0.341774
v -0.161420 -0.129687 0.350427
v -0.161727 -0.123269 0.341958
v -0.166299 -0.118376 0.337760
v -0.148318 -0.126544 0.328603
v -0.148318 -0.125992 0.315500
v -0.158408 -0.121281 0.328603
v -0.157905 -0.121002 0.315500
v -0.164960 -0.117618 0.328603
v -0.164456 -0.117331 0.315500
v -0.174522 -0.204482 0.358624
v -0.174522 -0.191379 0.358624
v -0.187625 -0.204482 0.358499
v -0.187625 -0.191379 0.358624
v -0.174522 -0.178277 0.358624
v -0.174522 -0.165175 0.358624
v -0.187625 -0.178277 0.358624
v -0.187625 -0.165175 0.358624
v -0.200727 -0.204482 0.357359
v -0.200727 -0.191379 0.357484
v -0.212479 -0.204482 0.352300
v -0.219031 -0.204482 0.346236
v -0.212479 -0.191379 0.352300
v -0.219031 -0.191379 0.346236
v -0.200727 -0.178277 0.357484
v -0.200727 -0.165175 0.357484
v -0.212479 -0.178277 0.352300
v -0.219031 -0.178277 0.346236
v -0.212479 -0.165175 0.352300
v -0.219031 -0.165175 0.346236
v -0.174522 -0.152072 0.358521
v -0.174522 -0.138970 0.357190
v -0.187625 -0.152072 0.358624
v -0.187625 -0.138970 0.358272
v -0.174568 -0.125365 0.352009
v -0.170232 -0.120662 0.346495
v -0.178967 -0.118016 0.349374
v -0.174568 -0.115790 0.341958
v -0.187625 -0.125868 0.355915
v -0.187625 -0.115344 0.351083
v -0.187025 -0.108716 0.342732
v -0.174522 -0.111877 0.328603
v -0.174522 -0.111302 0.315500
v -0.182385 -0.107024 0.328603
v -0.181919 -0.106736 0.315500
v -0.200727 -0.152072 0.357484
v -0.200727 -0.138970 0.357479
v -0.212479 -0.152072 0.352300
v -0.219031 -0.152072 0.346236
v -0.212479 -0.138970 0.352300
v -0.219031 -0.138970 0.346236
v -0.200727 -0.125868 0.356875
v -0.199777 -0.111678 0.352484
v -0.194777 -0.106585 0.347783
v -0.212479 -0.125868 0.352300
v -0.219031 -0.125868 0.346236
v -0.212479 -0.112765 0.351553
v -0.219031 -0.112765 0.346236
v -0.190993 -0.104250 0.339049
v -0.188936 -0.102980 0.328603
v -0.188470 -0.102692 0.315500
v -0.203512 -0.103889 0.349957
v -0.200790 -0.099702 0.342095
v -0.206803 -0.092819 0.336406
v -0.212361 -0.101195 0.349531
v -0.215034 -0.098500 0.345352
v -0.214504 -0.091143 0.340339
v -0.199549 -0.096428 0.328603
v -0.199084 -0.096141 0.315500
v -0.206100 -0.092385 0.328603
v -0.205635 -0.092097 0.315500
v -0.213829 -0.087614 0.328603
v -0.213829 -0.087039 0.315500
v -0.222013 -0.204482 0.339685
v -0.222013 -0.191379 0.339685
v -0.224134 -0.204482 0.328603
v -0.224622 -0.204482 0.315500
v -0.224134 -0.191379 0.328603
v -0.224622 -0.191379 0.315500
v -0.222013 -0.178277 0.339685
v -0.222013 -0.165175 0.339685
v -0.224134 -0.178277 0.328603
v -0.224622 -0.178277 0.315500
v -0.224134 -0.165175 0.328603
v -0.224622 -0.165175 0.315500
v -0.222013 -0.152072 0.339685
v -0.222013 -0.138970 0.339685
v -0.224134 -0.152072 0.328603
v -0.224622 -0.152072 0.315500
v -0.224134 -0.138970 0.328603
v -0.224622 -0.138970 0.315500
v -0.222013 -0.125868 0.339685
v -0.222013 -0.112765 0.339685
v -0.224134 -0.125868 0.328603
v -0.224622 -0.125868 0.315500
v -0.224134 -0.112765 0.328603
v -0.224622 -0.112765 0.315500
v -0.222013 -0.099663 0.339685
v -0.221469 -0.090123 0.338175
v -0.224134 -0.099663 0.328603
v -0.224622 -0.099663 0.315500
v -0.222257 -0.088341 0.328603
v -0.222501 -0.088054 0.315500
v 0.165989 -0.216339 0.302398
v 0.165606 -0.216021 0.289296
v 0.151534 -0.227422 0.302398
v 0.151151 -0.227137 0.289296
v 0.158085 -0.222890 0.302398
v 0.157702 -0.222573 0.289296
v 0.162885 -0.213767 0.276193
v 0.160228 -0.211564 0.269030
v 0.149341 -0.225947 0.279023
v 0.153439 -0.220780 0.275271
v 0.153036 -0.214330 0.267298
v 0.134450 -0.237873 0.302398
v 0.133972 -0.237588 0.289296
v 0.126832 -0.242408 0.302398
v 0.126832 -0.241839 0.289296
v 0.133457 -0.237282 0.282554
v 0.125854 -0.239049 0.277389
v 0.120835 -0.237568 0.269218
v 0.141001 -0.233973 0.302398
v 0.140523 -0.233688 0.289296
v 0.139549 -0.230457 0.276421
v 0.136906 -0.226232 0.268060
v 0.145641 -0.223633 0.270288
v 0.140738 -0.218593 0.265302
v 0.129570 -0.234967 0.273819
v 0.125854 -0.230635 0.266737
v 0.126832 -0.217584 0.261385
v 0.109250 -0.251163 0.302398
v 0.108587 -0.250900 0.289296
v 0.115801 -0.248324 0.302398
v 0.115138 -0.248040 0.289296
v 0.100627 -0.254591 0.302398
v 0.100627 -0.254064 0.289296
v 0.107676 -0.250538 0.281821
v 0.112718 -0.245718 0.276949
v 0.113729 -0.239304 0.267911
v 0.100627 -0.251939 0.278991
v 0.100627 -0.248729 0.272439
v 0.100627 -0.242178 0.266128
v 0.113729 -0.230686 0.263324
v 0.113729 -0.217584 0.259873
v 0.100627 -0.230686 0.261077
v 0.100627 -0.217584 0.259409
v 0.199034 -0.184984 0.302398
v 0.198988 -0.184932 0.292769
v 0.215878 -0.164423 0.302398
v 0.215583 -0.163984 0.289296
v 0.205038 -0.178277 0.302398
v 0.203491 -0.179356 0.288759
v 0.211450 -0.170975 0.302398
v 0.211122 -0.170535 0.289296
v 0.214192 -0.161904 0.278622
v 0.202241 -0.175464 0.276193
v 0.199791 -0.172727 0.268817
v 0.209315 -0.165833 0.275030
v 0.202695 -0.165175 0.267003
v 0.226812 -0.148081 0.302398
v 0.226518 -0.147642 0.289296
v 0.232231 -0.138970 0.302398
v 0.231664 -0.138970 0.289295
v 0.225849 -0.146642 0.280421
v 0.228118 -0.138807 0.276109
v 0.226132 -0.134330 0.268644
v 0.240286 -0.123560 0.302398
v 0.240013 -0.123005 0.289295
v 0.245503 -0.112765 0.302398
v 0.244972 -0.112765 0.289295
v 0.237069 -0.130112 0.302398
v 0.236796 -0.129557 0.289295
v 0.239227 -0.121406 0.279975
v 0.241271 -0.112623 0.275842
v 0.239157 -0.108160 0.268690
v 0.234816 -0.125811 0.275842
v 0.228258 -0.125868 0.267181
v 0.237012 -0.116895 0.271240
v 0.232247 -0.112623 0.265911
v 0.222429 -0.154633 0.302398
v 0.222135 -0.154193 0.289296
v 0.218824 -0.152485 0.275154
v 0.214721 -0.149593 0.267751
v 0.223456 -0.143065 0.271686
v 0.218873 -0.138807 0.266129
v 0.211800 -0.158328 0.269888
v 0.206638 -0.153206 0.264968
v 0.205446 -0.138970 0.261004
v 0.218548 -0.125868 0.262421
v 0.218548 -0.112765 0.260565
v 0.205446 -0.125868 0.259700
v 0.205446 -0.112765 0.259334
v 0.252201 -0.095745 0.302398
v 0.251942 -0.094987 0.289295
v 0.255328 -0.086561 0.302398
v 0.254812 -0.086561 0.289295
v 0.251557 -0.093856 0.281537
v 0.252800 -0.086561 0.278946
v 0.259304 -0.073458 0.302398
v 0.258797 -0.073458 0.289295
v 0.262385 -0.060356 0.302398
v 0.261886 -0.060356 0.289295
v 0.254630 -0.074135 0.275189
v 0.252191 -0.070219 0.268683
v 0.258343 -0.060356 0.276193
v 0.253302 -0.060356 0.267766
v 0.265391 -0.045571 0.302398
v 0.265145 -0.044347 0.289295
v 0.266832 -0.034151 0.302398
v 0.266341 -0.034151 0.289295
v 0.264063 -0.052123 0.302398
v 0.263814 -0.050898 0.289295
v 0.264735 -0.042316 0.281125
v 0.265128 -0.034151 0.279777
v 0.261495 -0.046911 0.276532
v 0.254637 -0.047254 0.266893
v 0.262112 -0.034151 0.273225
v 0.255560 -0.034151 0.266261
v 0.267747 -0.021049 0.302398
v 0.267256 -0.021049 0.289295
v 0.268167 -0.007947 0.302398
v 0.267677 -0.007947 0.289295
v 0.265586 -0.021049 0.278896
v 0.265797 -0.007947 0.278581
v 0.262596 -0.021049 0.272345
v 0.256045 -0.021049 0.265915
v 0.262807 -0.007947 0.272030
v 0.256256 -0.007947 0.265775
v 0.249970 -0.102296 0.302398
v 0.249711 -0.101538 0.289295
v 0.247409 -0.098799 0.276779
v 0.240809 -0.099663 0.267449
v 0.249649 -0.086561 0.272395
v 0.243098 -0.086561 0.266073
v 0.231650 -0.099663 0.262714
v 0.231650 -0.086561 0.260984
v 0.250944 -0.078954 0.270151
v 0.245847 -0.074135 0.265560
v 0.244753 -0.060356 0.263051
v 0.231650 -0.073458 0.260077
v 0.231650 -0.060356 0.259744
v 0.218548 -0.099663 0.259725
v 0.218548 -0.086561 0.259371
v 0.205446 -0.099663 0.259278
v 0.205446 -0.086561 0.259278
v 0.218548 -0.073458 0.259278
v 0.218548 -0.060356 0.259278
v 0.205446 -0.073458 0.259278
v 0.205446 -0.060356 0.259278
v 0.244753 -0.047254 0.261917
v 0.244753 -0.034151 0.261117
v 0.231650 -0.047254 0.259484
v 0.231650 -0.034151 0.259316
v 0.244753 -0.021049 0.260733
v 0.244753 -0.007947 0.260593
v 0.231650 -0.021049 0.259278
v 0.231650 -0.007947 0.259278
v 0.218548 -0.047254 0.259278
v 0.218548 -0.034151 0.259278
v 0.205446 -0.047254 0.259278
v 0.205446 -0.034151 0.259278
v 0.218548 -0.021049 0.259278
v 0.218548 -0.007947 0.259278
v 0.205446 -0.021049 0.259278
v 0.205446 -0.007947 0.259278
v 0.186619 -0.198854 0.302398
v 0.186291 -0.198487 0.289296
v 0.193170 -0.191536 0.302398
v 0.193846 -0.190131 0.288759
v 0.179241 -0.205281 0.302398
v 0.179241 -0.204597 0.289296
v 0.185905 -0.198057 0.282320
v 0.189086 -0.190977 0.277249
v 0.187147 -0.186341 0.268589
v 0.178856 -0.201090 0.277249
v 0.174232 -0.199209 0.268606
v 0.182967 -0.195076 0.273585
v 0.178856 -0.190977 0.266661
v 0.198550 -0.184443 0.284034
v 0.196376 -0.182015 0.276193
v 0.191846 -0.177568 0.266828
v 0.192343 -0.165175 0.262349
v 0.179241 -0.178277 0.261991
v 0.179241 -0.165175 0.259806
v 0.172540 -0.210909 0.302398
v 0.172157 -0.210591 0.289296
v 0.169437 -0.208336 0.276193
v 0.165213 -0.203938 0.266984
v 0.166139 -0.191379 0.262028
v 0.153036 -0.204482 0.262708
v 0.153036 -0.191379 0.259872
v 0.166139 -0.178277 0.259710
v 0.166139 -0.165175 0.259278
v 0.153036 -0.178277 0.259280
v 0.153036 -0.165175 0.259278
v 0.192343 -0.152072 0.260082
v 0.192343 -0.138970 0.259465
v 0.179241 -0.152072 0.259324
v 0.179241 -0.138970 0.259278
v 0.192343 -0.125868 0.259278
v 0.192343 -0.112765 0.259278
v 0.179241 -0.125868 0.259278
v 0.179241 -0.112765 0.259278
v 0.166139 -0.152072 0.259278
v 0.166139 -0.138970 0.259278
v 0.153036 -0.152072 0.259278
v 0.153036 -0.138970 0.259278
v 0.166139 -0.125868 0.259278
v 0.166139 -0.112765 0.259278
v 0.153036 -0.125868 0.259278
v 0.153036 -0.112765 0.259278
v 0.139934 -0.204482 0.260310
v 0.139934 -0.191379 0.259366
v 0.126832 -0.204482 0.259516
v 0.126832 -0.191379 0.259278
v 0.139934 -0.178277 0.259278
v 0.139934 -0.165175 0.259278
v 0.126832 -0.178277 0.259278
v 0.126832 -0.165175 0.259278
v 0.113729 -0.204482 0.259278
v 0.113729 -0.191379 0.259278
v 0.100627 -0.204482 0.259278
v 0.100627 -0.191379 0.259278
v 0.113729 -0.178277 0.259278
v 0.113729 -0.165175 0.259278
v 0.100627 -0.178277 0.259278
v 0.100627 -0.165175 0.259278
v 0.139934 -0.152072 0.259278
v 0.139934 -0.138970 0.259278
v 0.126832 -0.152072 0.259278
v 0.126832 -0.138970 0.259278
v 0.139934 -0.125868 0.259278
v 0.139934 -0.112765 0.259471
v 0.126832 -0.125868 0.259585
v 0.126832 -0.112765 0.260879
v 0.113729 -0.152072 0.259278
v 0.113729 -0.138970 0.259577
v 0.100627 -0.152072 0.259477
v 0.100627 -0.138970 0.260970
v 0.098199 -0.110114 0.302398
v 0.098508 -0.110449 0.289296
v 0.113729 -0.125868 0.261205
v 0.108493 -0.107882 0.271194
v 0.113208 -0.112456 0.265607
v 0.095574 -0.120726 0.271179
v 0.100216 -0.125403 0.265676
v 0.100773 -0.112939 0.275554
v 0.104309 -0.116617 0.267951
v 0.192343 -0.099663 0.259278
v 0.192343 -0.086561 0.259278
v 0.179241 -0.099663 0.259278
v 0.179241 -0.086561 0.259278
v 0.192343 -0.073458 0.259278
v 0.192343 -0.060356 0.259278
v 0.179241 -0.073458 0.259278
v 0.179241 -0.060356 0.259278
v 0.166139 -0.099663 0.259278
v 0.166139 -0.086561 0.259278
v 0.153036 -0.099663 0.259278
v 0.153036 -0.086561 0.259564
v 0.166139 -0.073458 0.259278
v 0.166139 -0.060356 0.259381
v 0.153036 -0.073458 0.260076
v 0.153036 -0.060356 0.261103
v 0.192343 -0.047254 0.259278
v 0.192343 -0.034151 0.259278
v 0.179241 -0.047254 0.259278
v 0.179241 -0.034151 0.259278
v 0.192343 -0.021049 0.259278
v 0.192343 -0.007947 0.259278
v 0.179241 -0.021049 0.259278
v 0.179241 -0.007947 0.259278
v 0.166139 -0.047254 0.259619
v 0.166139 -0.034151 0.259873
v 0.153036 -0.047254 0.262496
v 0.153036 -0.034151 0.263685
v 0.166139 -0.021049 0.260036
v 0.166139 -0.007947 0.260119
v 0.153036 -0.021049 0.264656
v 0.146642 -0.004228 0.269876
v 0.151820 -0.008336 0.266076
v 0.120446 -0.080307 0.302398
v 0.120726 -0.080810 0.289296
v 0.139934 -0.099663 0.260011
v 0.139934 -0.086561 0.261706
v 0.120609 -0.093563 0.270058
v 0.125718 -0.098624 0.264891
v 0.122423 -0.085772 0.275132
v 0.129147 -0.086561 0.266603
v 0.123904 -0.073458 0.302398
v 0.124445 -0.073458 0.289296
v 0.129631 -0.060356 0.302398
v 0.130152 -0.060356 0.289296
v 0.133790 -0.068002 0.270213
v 0.138868 -0.072805 0.265345
v 0.135210 -0.060356 0.273022
v 0.141761 -0.060356 0.266182
v 0.129059 -0.072805 0.275226
v 0.131774 -0.076737 0.268325
v 0.132028 -0.060356 0.279573
v 0.109856 -0.096547 0.302398
v 0.110166 -0.096945 0.289296
v 0.116407 -0.086858 0.302398
v 0.116717 -0.087361 0.289296
v 0.104750 -0.103099 0.302398
v 0.105060 -0.103496 0.289296
v 0.113302 -0.099115 0.274993
v 0.117228 -0.102298 0.267655
v 0.118112 -0.089613 0.278792
v 0.105972 -0.104667 0.279929
v 0.134426 -0.045480 0.302398
v 0.134675 -0.046182 0.289296
v 0.136853 -0.034151 0.302398
v 0.137353 -0.034151 0.289296
v 0.132724 -0.052031 0.302398
v 0.132985 -0.052733 0.289296
v 0.137054 -0.048416 0.277244
v 0.143752 -0.047254 0.267336
v 0.140890 -0.034151 0.276193
v 0.145206 -0.034151 0.268271
v 0.133291 -0.053558 0.282312
v 0.138726 -0.021049 0.302398
v 0.139221 -0.021049 0.289296
v 0.139604 -0.007947 0.302398
v 0.140094 -0.007947 0.289296
v 0.142724 -0.021049 0.276193
v 0.146109 -0.021049 0.269079
v 0.144062 -0.008336 0.275023
v 0.146381 -0.012963 0.269487
v 0.073116 -0.264779 0.302398
v 0.072350 -0.264528 0.289296
v 0.070347 -0.263999 0.280541
v 0.061320 -0.267589 0.302398
v 0.061320 -0.267088 0.289296
v 0.048218 -0.270536 0.302398
v 0.048218 -0.270035 0.289296
v 0.061320 -0.265014 0.278363
v 0.048197 -0.266169 0.275320
v 0.043816 -0.263926 0.268949
v 0.087525 -0.259799 0.302398
v 0.087525 -0.259272 0.289296
v 0.079667 -0.262923 0.302398
v 0.078901 -0.262659 0.289296
v 0.088524 -0.254620 0.275055
v 0.084823 -0.251870 0.268314
v 0.093558 -0.250134 0.269928
v 0.088524 -0.244975 0.265290
v 0.074598 -0.260432 0.276181
v 0.074422 -0.253652 0.266951
v 0.074422 -0.243789 0.262028
v 0.087525 -0.230686 0.260016
v 0.087525 -0.217584 0.259278
v 0.074422 -0.230686 0.259537
v 0.074422 -0.217584 0.259278
v 0.061320 -0.261957 0.271811
v 0.061320 -0.255406 0.265860
v 0.061320 -0.243789 0.260688
v 0.052550 -0.262943 0.270371
v 0.048197 -0.257902 0.265771
v 0.048218 -0.243789 0.260142
v 0.061320 -0.230686 0.259288
v 0.061320 -0.217584 0.259278
v 0.048218 -0.230686 0.259278
v 0.048218 -0.217584 0.259278
v 0.035115 -0.273356 0.302398
v 0.035115 -0.272860 0.289296
v 0.022013 -0.275167 0.302398
v 0.022013 -0.274677 0.289296
v 0.035115 -0.269341 0.276193
v 0.035115 -0.264880 0.268121
v 0.022013 -0.271197 0.276193
v 0.022013 -0.265825 0.267487
v 0.002467 -0.276552 0.302398
v 0.002431 -0.276550 0.293093
v 0.009018 -0.276088 0.302398
v 0.007643 -0.275790 0.288953
v -0.004192 -0.277024 0.302398
v -0.004192 -0.276784 0.290552
v -0.004192 -0.276294 0.284001
v 0.008911 -0.272125 0.276193
v 0.008911 -0.266289 0.267178
v -0.004192 -0.273053 0.276193
v -0.004192 -0.266753 0.266869
v 0.035115 -0.256891 0.263517
v 0.035115 -0.243789 0.259856
v 0.022013 -0.256891 0.262679
v 0.022013 -0.243789 0.259652
v 0.035115 -0.230686 0.259278
v 0.035115 -0.217584 0.259278
v 0.022013 -0.230686 0.259278
v 0.022013 -0.217584 0.259278
v 0.008911 -0.256891 0.262263
v 0.008911 -0.243789 0.259546
v -0.004192 -0.256891 0.261862
v -0.004192 -0.243789 0.259454
v 0.008911 -0.230686 0.259278
v 0.008911 -0.217584 0.259278
v -0.004192 -0.230686 0.259278
v -0.004192 -0.217584 0.259278
v -0.017294 -0.277787 0.302398
v -0.016088 -0.277154 0.288022
v -0.010917 -0.276532 0.282806
v -0.030396 -0.277946 0.302398
v -0.030396 -0.277457 0.289296
v -0.019652 -0.276732 0.281801
v -0.016088 -0.274253 0.276937
v -0.017294 -0.267138 0.266609
v -0.030396 -0.276756 0.281682
v -0.030396 -0.273773 0.275131
v -0.030396 -0.267221 0.266551
v -0.043499 -0.277491 0.302398
v -0.043762 -0.276980 0.288334
v -0.048306 -0.276429 0.283326
v -0.054811 -0.276861 0.302398
v -0.053224 -0.276755 0.292060
v -0.061362 -0.276414 0.302398
v -0.057195 -0.276174 0.288334
v -0.039571 -0.276639 0.282272
v -0.043762 -0.274073 0.277220
v -0.043499 -0.266991 0.266707
v -0.056601 -0.272752 0.276193
v -0.056601 -0.266600 0.266974
v -0.017294 -0.256891 0.261523
v -0.017294 -0.243789 0.259375
v -0.030396 -0.256891 0.261447
v -0.030396 -0.243789 0.259356
v -0.017294 -0.230686 0.259278
v -0.017294 -0.217584 0.259278
v -0.030396 -0.230686 0.259278
v -0.030396 -0.217584 0.259278
v -0.043499 -0.256891 0.261651
v -0.043499 -0.243789 0.259404
v -0.056601 -0.256891 0.262002
v -0.056601 -0.243789 0.259488
v -0.043499 -0.230686 0.259278
v -0.043499 -0.217584 0.259278
v -0.056601 -0.230686 0.259278
v -0.056601 -0.217584 0.259278
v -0.069704 -0.275538 0.302398
v -0.069704 -0.275046 0.289296
v -0.082806 -0.273866 0.302398
v -0.082806 -0.273372 0.289296
v -0.069704 -0.271552 0.276193
v -0.069704 -0.265996 0.267379
v -0.082806 -0.269867 0.276193
v -0.082806 -0.265149 0.267945
v -0.095908 -0.271821 0.302398
v -0.095908 -0.271323 0.289296
v -0.109011 -0.269302 0.302398
v -0.109011 -0.268802 0.289296
v -0.095908 -0.267789 0.276193
v -0.095908 -0.264098 0.268894
v -0.107849 -0.265418 0.275656
v -0.102708 -0.263495 0.269564
v -0.069704 -0.256891 0.262530
v -0.069704 -0.243789 0.259611
v -0.082806 -0.256891 0.263268
v -0.082806 -0.243789 0.259784
v -0.069704 -0.230686 0.259278
v -0.069704 -0.217584 0.259278
v -0.082806 -0.230686 0.259278
v -0.082806 -0.217584 0.259278
v -0.095908 -0.256891 0.264436
v -0.095908 -0.243789 0.260002
v -0.111443 -0.262562 0.270931
v -0.107849 -0.257673 0.266276
v -0.109011 -0.243789 0.260311
v -0.095908 -0.230686 0.259278
v -0.095908 -0.217584 0.259278
v -0.109011 -0.230686 0.259278
v -0.109011 -0.217584 0.259278
v 0.087525 -0.204482 0.259278
v 0.087525 -0.191379 0.259278
v 0.074422 -0.204482 0.259278
v 0.074422 -0.191379 0.259278
v 0.087525 -0.178277 0.259278
v 0.087525 -0.165175 0.259296
v 0.074422 -0.178277 0.259278
v 0.074422 -0.165175 0.259602
v 0.061320 -0.204482 0.259278
v 0.061320 -0.191379 0.259278
v 0.048218 -0.204482 0.259278
v 0.048218 -0.191379 0.259278
v 0.061320 -0.178277 0.259278
v 0.061320 -0.165175 0.260303
v 0.048218 -0.178277 0.259460
v 0.048218 -0.165175 0.261596
v 0.068993 -0.133129 0.302398
v 0.069423 -0.133401 0.289296
v 0.087525 -0.152072 0.260130
v 0.081430 -0.132734 0.270030
v 0.086489 -0.137849 0.265047
v 0.074422 -0.152072 0.261954
v 0.073905 -0.134942 0.275116
v 0.074422 -0.141496 0.266812
v 0.084705 -0.122123 0.302398
v 0.085062 -0.122420 0.289296
v 0.091257 -0.116665 0.302398
v 0.091614 -0.117000 0.289296
v 0.075544 -0.128674 0.302398
v 0.075974 -0.128971 0.289296
v 0.087051 -0.125522 0.274972
v 0.090165 -0.129461 0.267781
v 0.092672 -0.117996 0.279914
v 0.077928 -0.130318 0.278765
v 0.061320 -0.137064 0.302398
v 0.061320 -0.137610 0.289296
v 0.041940 -0.145611 0.302398
v 0.042724 -0.145869 0.289296
v 0.048492 -0.142906 0.302398
v 0.049275 -0.143178 0.289296
v 0.056466 -0.146357 0.270764
v 0.061028 -0.151264 0.265617
v 0.061028 -0.141786 0.275556
v 0.065201 -0.144206 0.268476
v 0.047643 -0.147762 0.275556
v 0.048218 -0.154571 0.266596
v 0.051628 -0.144141 0.279499
v 0.035115 -0.204482 0.259278
v 0.035115 -0.191379 0.259278
v 0.022013 -0.204482 0.259278
v 0.022013 -0.191379 0.259278
v 0.035115 -0.178277 0.259834
v 0.035115 -0.165175 0.263377
v 0.022013 -0.178277 0.260145
v 0.017924 -0.159083 0.270319
v 0.022180 -0.164140 0.265819
v 0.008911 -0.204482 0.259278
v 0.008911 -0.191379 0.259278
v -0.004192 -0.204482 0.259278
v -0.004192 -0.191379 0.259282
v 0.008911 -0.178277 0.260556
v 0.008911 -0.159925 0.271557
v 0.008911 -0.166476 0.265738
v -0.004192 -0.178277 0.260990
v -0.004192 -0.160781 0.272854
v -0.004192 -0.167332 0.266168
v 0.035115 -0.147854 0.302398
v 0.035115 -0.148369 0.289296
v 0.022013 -0.151473 0.302398
v 0.022013 -0.151979 0.289296
v 0.035115 -0.152023 0.276193
v 0.035115 -0.156893 0.268003
v 0.022180 -0.155906 0.275289
v 0.026659 -0.158187 0.269022
v 0.008911 -0.154163 0.302398
v 0.008911 -0.154660 0.289296
v -0.004192 -0.155928 0.302398
v -0.004192 -0.156421 0.289296
v 0.008911 -0.156890 0.278108
v -0.004192 -0.157769 0.279405
v -0.017294 -0.204482 0.259278
v -0.017294 -0.191379 0.259324
v -0.030396 -0.204482 0.259278
v -0.030396 -0.191379 0.259358
v -0.017294 -0.178277 0.261302
v -0.017294 -0.161220 0.274229
v -0.017294 -0.167771 0.266437
v -0.030396 -0.178277 0.261453
v -0.030396 -0.161399 0.275134
v -0.030396 -0.167950 0.266555
v -0.043499 -0.204482 0.259278
v -0.043499 -0.191379 0.259316
v -0.056601 -0.204482 0.259278
v -0.056601 -0.191379 0.259278
v -0.043499 -0.178277 0.261243
v -0.043499 -0.161141 0.274048
v -0.043499 -0.167692 0.266387
v -0.056601 -0.178277 0.260779
v -0.056601 -0.160476 0.272396
v -0.056601 -0.167027 0.265961
v -0.017294 -0.156859 0.302398
v -0.017294 -0.157349 0.289296
v -0.030396 -0.157221 0.302398
v -0.030396 -0.157711 0.289296
v -0.017294 -0.158231 0.280780
v -0.030396 -0.158412 0.281685
v -0.043499 -0.156699 0.302398
v -0.043499 -0.157189 0.289296
v -0.056601 -0.155330 0.302398
v -0.056601 -0.155823 0.289296
v -0.043499 -0.158151 0.280599
v -0.056601 -0.157470 0.278947
v -0.069704 -0.204482 0.259278
v -0.069704 -0.191379 0.259278
v -0.082806 -0.204482 0.259278
v -0.082806 -0.191379 0.259278
v -0.069704 -0.178277 0.260344
v -0.069704 -0.159452 0.270866
v -0.069704 -0.166003 0.265527
v -0.082806 -0.178277 0.260040
v -0.076981 -0.158776 0.269865
v -0.081931 -0.163956 0.265540
v -0.095908 -0.204482 0.259278
v -0.095908 -0.191379 0.259278
v -0.109011 -0.204482 0.259278
v -0.109011 -0.191379 0.259278
v -0.095908 -0.178277 0.259732
v -0.095908 -0.165175 0.262910
v -0.109011 -0.178277 0.259421
v -0.109011 -0.165175 0.261338
v -0.069704 -0.153221 0.302398
v -0.069704 -0.153718 0.289296
v -0.082806 -0.150399 0.302398
v -0.082806 -0.150902 0.289296
v -0.069704 -0.156419 0.277418
v -0.081931 -0.155211 0.275017
v -0.085716 -0.157749 0.268699
v -0.095033 -0.147167 0.302398
v -0.096868 -0.147133 0.288428
v -0.101584 -0.145238 0.302398
v -0.101876 -0.145333 0.292217
v -0.102937 -0.145675 0.283482
v -0.109011 -0.142688 0.302398
v -0.107987 -0.143577 0.288428
v -0.095908 -0.151015 0.276193
v -0.095908 -0.156375 0.267639
v -0.107987 -0.147425 0.275534
v -0.109011 -0.154337 0.266377
v -0.111672 -0.144170 0.279462
v -0.122113 -0.266225 0.302398
v -0.122113 -0.265723 0.289296
v -0.130751 -0.263996 0.302398
v -0.129799 -0.263743 0.289296
v -0.122113 -0.264331 0.280318
v -0.128786 -0.263475 0.282588
v -0.137302 -0.262078 0.302398
v -0.136350 -0.261821 0.289296
v -0.122113 -0.261263 0.273767
v -0.122113 -0.254712 0.266245
v -0.122113 -0.243789 0.261164
v -0.133978 -0.259474 0.277409
v -0.135215 -0.252869 0.267448
v -0.135215 -0.243789 0.262667
v -0.122113 -0.230686 0.259380
v -0.122113 -0.217584 0.259278
v -0.135215 -0.230686 0.259679
v -0.135215 -0.217584 0.259278
v -0.148318 -0.258536 0.302398
v -0.148318 -0.258019 0.289296
v -0.161420 -0.253908 0.302398
v -0.161420 -0.253383 0.289296
v -0.148878 -0.253823 0.275271
v -0.144884 -0.251370 0.268608
v -0.153619 -0.249880 0.270288
v -0.148878 -0.244823 0.265531
v -0.161420 -0.251599 0.279885
v -0.161420 -0.248394 0.273334
v -0.161420 -0.241843 0.266254
v -0.148318 -0.230686 0.260096
v -0.148318 -0.217584 0.259278
v -0.161420 -0.230686 0.261230
v -0.161420 -0.217584 0.259435
v -0.169314 -0.250899 0.302398
v -0.168678 -0.250634 0.289296
v -0.175865 -0.248170 0.302398
v -0.175229 -0.247901 0.289296
v -0.187625 -0.242972 0.302398
v -0.187625 -0.242435 0.289296
v -0.168018 -0.250360 0.282653
v -0.173240 -0.245580 0.277448
v -0.174522 -0.239192 0.267946
v -0.186797 -0.239325 0.276226
v -0.181879 -0.237610 0.269136
v -0.174522 -0.230686 0.263346
v -0.174522 -0.217584 0.259860
v -0.190613 -0.235567 0.271880
v -0.186797 -0.230994 0.266413
v -0.187625 -0.217584 0.260928
v -0.196918 -0.238591 0.302398
v -0.196375 -0.238322 0.289296
v -0.195279 -0.237781 0.280615
v -0.203470 -0.235320 0.302398
v -0.202926 -0.235046 0.289296
v -0.213829 -0.230104 0.302398
v -0.213829 -0.229556 0.289296
v -0.200079 -0.232927 0.276226
v -0.200727 -0.226531 0.267653
v -0.200727 -0.217584 0.263165
v -0.213112 -0.226383 0.276248
v -0.208267 -0.224633 0.268977
v -0.217171 -0.217584 0.272358
v -0.210620 -0.217584 0.267122
v -0.222501 -0.225470 0.302398
v -0.222223 -0.225197 0.289296
v -0.224622 -0.217584 0.302398
v -0.224099 -0.217584 0.289296
v -0.221423 -0.224660 0.280651
v -0.221979 -0.217584 0.278910
v -0.122113 -0.204482 0.259278
v -0.122113 -0.191379 0.259278
v -0.135215 -0.204482 0.259278
v -0.135215 -0.191379 0.259278
v -0.122113 -0.178277 0.259278
v -0.122113 -0.165175 0.260234
v -0.135215 -0.178277 0.259278
v -0.135215 -0.165175 0.259696
v -0.148318 -0.204482 0.259278
v -0.148318 -0.191379 0.259278
v -0.161420 -0.204482 0.259278
v -0.161420 -0.191379 0.259278
v -0.148318 -0.178277 0.259278
v -0.148318 -0.165175 0.259362
v -0.161420 -0.178277 0.259278
v -0.161420 -0.165175 0.259278
v -0.122113 -0.137812 0.302398
v -0.122113 -0.138340 0.289296
v -0.131852 -0.133812 0.302398
v -0.132463 -0.134078 0.289296
v -0.117604 -0.146297 0.270727
v -0.122028 -0.151227 0.265699
v -0.122028 -0.142313 0.275534
v -0.126339 -0.144608 0.268705
v -0.135215 -0.152072 0.262595
v -0.135669 -0.136187 0.276125
v -0.135215 -0.142718 0.267360
v -0.138403 -0.130858 0.302398
v -0.139014 -0.131131 0.289296
v -0.140339 -0.131742 0.280446
v -0.148318 -0.152072 0.260773
v -0.144881 -0.133962 0.271711
v -0.148876 -0.138586 0.266176
v -0.161420 -0.152072 0.259780
v -0.161420 -0.138970 0.262793
v -0.148318 -0.125992 0.302398
v -0.148318 -0.126545 0.289296
v -0.157905 -0.121002 0.302398
v -0.158408 -0.121281 0.289296
v -0.164456 -0.117331 0.302398
v -0.164960 -0.117619 0.289296
v -0.148876 -0.129918 0.276125
v -0.153616 -0.131799 0.268893
v -0.161727 -0.123270 0.275940
v -0.161420 -0.129688 0.267473
v -0.166300 -0.118376 0.280139
v -0.174522 -0.204482 0.259278
v -0.174522 -0.191379 0.259278
v -0.187625 -0.204482 0.259403
v -0.187625 -0.191379 0.259278
v -0.174522 -0.178277 0.259278
v -0.174522 -0.165175 0.259278
v -0.187625 -0.178277 0.259278
v -0.187625 -0.165175 0.259278
v -0.200727 -0.204482 0.260543
v -0.200727 -0.191379 0.260418
v -0.219030 -0.204482 0.271664
v -0.212478 -0.204482 0.265600
v -0.219030 -0.191379 0.271664
v -0.212478 -0.191379 0.265600
v -0.200727 -0.178277 0.260418
v -0.200727 -0.165175 0.260418
v -0.219030 -0.178277 0.271664
v -0.212478 -0.178277 0.265600
v -0.219030 -0.165175 0.271664
v -0.212478 -0.165175 0.265600
v -0.174522 -0.152072 0.259381
v -0.174522 -0.138970 0.260712
v -0.187625 -0.152072 0.259278
v -0.187625 -0.138970 0.259630
v -0.174522 -0.111302 0.302398
v -0.174522 -0.111877 0.289296
v -0.181919 -0.106736 0.302398
v -0.182385 -0.107024 0.289296
v -0.170233 -0.120663 0.271405
v -0.174569 -0.125365 0.265891
v -0.174569 -0.115791 0.275940
v -0.178968 -0.118017 0.268525
v -0.187625 -0.125868 0.261987
v -0.187025 -0.108717 0.275167
v -0.187625 -0.115345 0.266817
v -0.200727 -0.152072 0.260418
v -0.200727 -0.138970 0.260422
v -0.219030 -0.152072 0.271664
v -0.212478 -0.152072 0.265600
v -0.219030 -0.138970 0.271664
v -0.212478 -0.138970 0.265600
v -0.200727 -0.125868 0.261026
v -0.194778 -0.106586 0.270116
v -0.199778 -0.111678 0.265416
v -0.219030 -0.125868 0.271664
v -0.212478 -0.125868 0.265600
v -0.219030 -0.112765 0.271664
v -0.212478 -0.112765 0.266347
v -0.188470 -0.102692 0.302398
v -0.188936 -0.102980 0.289296
v -0.190993 -0.104250 0.278851
v -0.199084 -0.096141 0.302398
v -0.199549 -0.096429 0.289296
v -0.205635 -0.092097 0.302398
v -0.206101 -0.092385 0.289296
v -0.213829 -0.087039 0.302398
v -0.213829 -0.087614 0.289296
v -0.200791 -0.099703 0.275804
v -0.203513 -0.103890 0.267943
v -0.206804 -0.092819 0.281493
v -0.215034 -0.098501 0.272548
v -0.212361 -0.101196 0.268368
v -0.214505 -0.091143 0.277561
v -0.224622 -0.204482 0.302398
v -0.224133 -0.204482 0.289296
v -0.224622 -0.191379 0.302398
v -0.224133 -0.191379 0.289296
v -0.222013 -0.204482 0.278215
v -0.222013 -0.191379 0.278215
v -0.224622 -0.178277 0.302398
v -0.224133 -0.178277 0.289296
v -0.224622 -0.165175 0.302398
v -0.224133 -0.165175 0.289296
v -0.222013 -0.178277 0.278215
v -0.222013 -0.165175 0.278215
v -0.224622 -0.152072 0.302398
v -0.224133 -0.152072 0.289296
v -0.224622 -0.138970 0.302398
v -0.224133 -0.138970 0.289296
v -0.222013 -0.152072 0.278215
v -0.222013 -0.138970 0.278215
v -0.224622 -0.125868 0.302398
v -0.224133 -0.125868 0.289296
v -0.224622 -0.112765 0.302398
v -0.224133 -0.112765 0.289296
v -0.222013 -0.125868 0.278215
v -0.222013 -0.112765 0.278215
v -0.224622 -0.099663 0.302398
v -0.224133 -0.099663 0.289296
v -0.222501 -0.088054 0.302398
v -0.222257 -0.088341 0.289296
v -0.222013 -0.099663 0.278215
v -0.221469 -0.090123 0.279725
v 0.265552 0.005156 0.338953
v 0.265099 0.018258 0.338055
v 0.256012 0.005156 0.351962
v 0.262563 0.005156 0.345504
v 0.255559 0.018258 0.351660
v 0.262110 0.018258 0.344606
v 0.267188 0.005156 0.328603
v 0.267678 0.005156 0.315500
v 0.266282 0.018258 0.328603
v 0.266772 0.018258 0.315500
v 0.264717 0.028463 0.336715
v 0.254954 0.031361 0.351236
v 0.261993 0.032242 0.341331
v 0.253873 0.044463 0.350502
v 0.259491 0.044463 0.341705
v 0.265083 0.032242 0.329461
v 0.265632 0.031361 0.315500
v 0.264586 0.038750 0.325665
v 0.264676 0.039169 0.315500
v 0.264253 0.037198 0.334400
v 0.263206 0.043656 0.329461
v 0.263271 0.045720 0.315500
v 0.252468 0.057565 0.349487
v 0.256681 0.057565 0.341705
v 0.251611 0.065549 0.348706
v 0.253676 0.070217 0.342328
v 0.260230 0.057565 0.328603
v 0.260730 0.057565 0.315500
v 0.257283 0.070668 0.328603
v 0.257794 0.070668 0.315500
v 0.252609 0.080716 0.338377
v 0.253093 0.084558 0.328994
v 0.253818 0.083770 0.315500
v 0.251326 0.090382 0.324888
v 0.251338 0.090412 0.315500
v 0.244753 0.005156 0.357146
v 0.244753 0.018258 0.356828
v 0.231650 0.005156 0.358623
v 0.231650 0.018258 0.358607
v 0.244753 0.031361 0.356291
v 0.244753 0.044463 0.355327
v 0.231650 0.031361 0.358496
v 0.231650 0.044463 0.358264
v 0.218548 0.005156 0.358623
v 0.218548 0.018258 0.358623
v 0.205446 0.005156 0.358623
v 0.205446 0.018258 0.358623
v 0.218548 0.031361 0.358623
v 0.218548 0.044463 0.358623
v 0.205446 0.031361 0.358623
v 0.205446 0.044463 0.358623
v 0.244753 0.057565 0.354038
v 0.245573 0.070217 0.351852
v 0.250488 0.074284 0.347111
v 0.231650 0.057565 0.357991
v 0.231650 0.070668 0.357598
v 0.242305 0.083770 0.351393
v 0.249151 0.084558 0.342328
v 0.239859 0.096872 0.349747
v 0.244700 0.096872 0.341705
v 0.231650 0.083770 0.356389
v 0.231650 0.096872 0.354327
v 0.250979 0.089451 0.333623
v 0.248971 0.095598 0.328994
v 0.248892 0.096963 0.315500
v 0.218548 0.057565 0.358623
v 0.218548 0.070668 0.358623
v 0.205446 0.057565 0.358623
v 0.205446 0.070668 0.358623
v 0.218548 0.083770 0.358436
v 0.218548 0.096872 0.358020
v 0.205446 0.083770 0.358623
v 0.205446 0.096872 0.358623
v 0.238491 0.104199 0.348662
v 0.240182 0.109130 0.341701
v 0.238801 0.117609 0.337332
v 0.231957 0.109130 0.351413
v 0.236529 0.112934 0.346066
v 0.227328 0.123077 0.349994
v 0.233653 0.122417 0.341701
v 0.243259 0.109975 0.328603
v 0.243799 0.109975 0.315500
v 0.239381 0.118655 0.328603
v 0.239660 0.119160 0.315500
v 0.235753 0.125206 0.328603
v 0.236032 0.125711 0.315500
v 0.225376 0.130128 0.348619
v 0.226873 0.135169 0.340740
v 0.225230 0.142967 0.335730
v 0.229678 0.136179 0.328603
v 0.230236 0.136179 0.315500
v 0.225574 0.143589 0.328603
v 0.225854 0.144093 0.315500
v 0.218548 0.109975 0.356937
v 0.218548 0.123077 0.354572
v 0.205446 0.109975 0.358479
v 0.205446 0.123077 0.358018
v 0.218573 0.135169 0.351171
v 0.222958 0.138863 0.344465
v 0.214223 0.145866 0.349910
v 0.218258 0.148784 0.341431
v 0.205446 0.136179 0.356547
v 0.206188 0.149853 0.352425
v 0.211051 0.154601 0.347133
v 0.221196 0.150140 0.328603
v 0.221504 0.150644 0.315500
v 0.213557 0.157864 0.338398
v 0.201511 0.162384 0.349960
v 0.207773 0.162292 0.342341
v 0.198962 0.169023 0.348336
v 0.200875 0.171514 0.341705
v 0.214645 0.159281 0.328603
v 0.214953 0.159682 0.315500
v 0.209614 0.165832 0.328603
v 0.209922 0.166233 0.315500
v 0.203063 0.174363 0.328603
v 0.203371 0.174764 0.315500
v 0.192343 0.005156 0.358623
v 0.192343 0.018258 0.358623
v 0.179241 0.005156 0.358623
v 0.179241 0.018258 0.358623
v 0.192343 0.031361 0.358623
v 0.192343 0.044463 0.358623
v 0.179241 0.031361 0.358623
v 0.179241 0.044463 0.358623
v 0.166139 0.005156 0.357790
v 0.166139 0.018258 0.357881
v 0.151820 0.005172 0.351873
v 0.146641 0.000815 0.348023
v 0.153036 0.018258 0.353419
v 0.166139 0.031361 0.358064
v 0.166139 0.044463 0.358340
v 0.153036 0.031361 0.354448
v 0.153036 0.044463 0.355714
v 0.192343 0.057565 0.358623
v 0.192343 0.070668 0.358623
v 0.179241 0.057565 0.358623
v 0.179241 0.070668 0.358623
v 0.192343 0.083770 0.358623
v 0.192343 0.096872 0.358623
v 0.179241 0.083770 0.358623
v 0.179241 0.096872 0.358623
v 0.166139 0.057565 0.358551
v 0.166139 0.070668 0.358623
v 0.153036 0.057565 0.357038
v 0.153036 0.070668 0.357943
v 0.166139 0.083770 0.358623
v 0.166139 0.096872 0.358623
v 0.153036 0.083770 0.358404
v 0.153036 0.096872 0.358623
v 0.146333 0.009550 0.348484
v 0.144004 0.005172 0.342875
v 0.145963 0.018258 0.348977
v 0.142419 0.018258 0.341705
v 0.140020 0.005156 0.328603
v 0.139530 0.005156 0.315500
v 0.138903 0.018258 0.328603
v 0.138408 0.018258 0.315500
v 0.144953 0.031361 0.349824
v 0.140369 0.031361 0.341705
v 0.143350 0.044463 0.350814
v 0.136616 0.045078 0.341599
v 0.132943 0.049855 0.337161
v 0.136816 0.031361 0.328603
v 0.136316 0.031361 0.315500
v 0.134383 0.042035 0.328603
v 0.134133 0.041345 0.315500
v 0.132462 0.048586 0.328603
v 0.132200 0.047896 0.315500
v 0.141221 0.057565 0.351927
v 0.134670 0.057565 0.346455
v 0.138641 0.069404 0.352835
v 0.133412 0.064194 0.348214
v 0.131480 0.057565 0.339903
v 0.131239 0.072930 0.349884
v 0.126895 0.070657 0.341805
v 0.129055 0.057565 0.328603
v 0.128532 0.057565 0.315500
v 0.123424 0.070019 0.328603
v 0.123163 0.069519 0.315500
v 0.139934 0.083770 0.356564
v 0.139934 0.096872 0.358042
v 0.126856 0.084817 0.351173
v 0.122505 0.081147 0.344131
v 0.126832 0.096872 0.354920
v 0.120225 0.077120 0.335396
v 0.119917 0.076571 0.328603
v 0.119637 0.076070 0.315500
v 0.119940 0.089882 0.348659
v 0.118330 0.084817 0.340540
v 0.117232 0.096872 0.350318
v 0.110887 0.096732 0.342559
v 0.105241 0.101007 0.338761
v 0.115325 0.083770 0.328603
v 0.114735 0.083770 0.315500
v 0.109137 0.092848 0.328603
v 0.108827 0.092449 0.315500
v 0.103919 0.099399 0.328603
v 0.103566 0.099000 0.315500
v 0.192343 0.109975 0.358623
v 0.192343 0.123077 0.358623
v 0.179241 0.109975 0.358623
v 0.179241 0.123077 0.358623
v 0.192343 0.136179 0.358358
v 0.192343 0.149282 0.357265
v 0.179241 0.136179 0.358623
v 0.179241 0.149282 0.358478
v 0.166139 0.109975 0.358623
v 0.166139 0.123077 0.358623
v 0.153036 0.109975 0.358623
v 0.153036 0.123077 0.358623
v 0.166139 0.136179 0.358623
v 0.166139 0.149282 0.358623
v 0.153036 0.136179 0.358623
v 0.153036 0.149282 0.358623
v 0.192343 0.162384 0.354453
v 0.191361 0.174229 0.350281
v 0.195310 0.178065 0.341705
v 0.179241 0.162384 0.357844
v 0.179241 0.175486 0.355224
v 0.197810 0.180914 0.328603
v 0.198161 0.181315 0.315500
v 0.186338 0.182564 0.348823
v 0.188759 0.184898 0.341705
v 0.178161 0.187594 0.350429
v 0.181964 0.191449 0.341705
v 0.173073 0.195509 0.348654
v 0.175413 0.197766 0.341705
v 0.191258 0.187308 0.328603
v 0.191610 0.187647 0.315500
v 0.184464 0.193859 0.328603
v 0.184816 0.194199 0.315500
v 0.177913 0.200176 0.328603
v 0.178265 0.200515 0.315500
v 0.166139 0.162384 0.358535
v 0.166139 0.175486 0.357830
v 0.153036 0.162384 0.358623
v 0.153036 0.175486 0.358518
v 0.166139 0.188589 0.354971
v 0.166139 0.198473 0.350491
v 0.166636 0.204926 0.342802
v 0.153036 0.188589 0.357670
v 0.154101 0.202826 0.352874
v 0.159178 0.207950 0.347900
v 0.171064 0.206727 0.328603
v 0.171471 0.207066 0.315500
v 0.139934 0.109975 0.358511
v 0.139934 0.123077 0.358623
v 0.126832 0.109975 0.357451
v 0.126832 0.123077 0.358395
v 0.139934 0.136179 0.358623
v 0.139934 0.149282 0.358623
v 0.126832 0.136179 0.358623
v 0.126832 0.149282 0.358623
v 0.112804 0.109162 0.352786
v 0.107821 0.104252 0.347496
v 0.113729 0.123077 0.357120
v 0.103558 0.112987 0.350309
v 0.100032 0.109371 0.343122
v 0.099765 0.122197 0.352695
v 0.094823 0.117242 0.347482
v 0.097368 0.106580 0.328603
v 0.097015 0.106241 0.315500
v 0.113729 0.136179 0.358401
v 0.113729 0.149282 0.358623
v 0.100627 0.136179 0.357317
v 0.100627 0.149282 0.358491
v 0.139934 0.162384 0.358623
v 0.139934 0.175486 0.358623
v 0.126832 0.162384 0.358623
v 0.126832 0.175486 0.358623
v 0.139934 0.188589 0.358431
v 0.139934 0.201691 0.356930
v 0.126832 0.188589 0.358623
v 0.126832 0.201691 0.358278
v 0.113729 0.162384 0.358623
v 0.113729 0.175486 0.358623
v 0.100627 0.162384 0.358623
v 0.100627 0.175486 0.358623
v 0.113729 0.188589 0.358623
v 0.113729 0.201691 0.358623
v 0.100627 0.188589 0.358623
v 0.100627 0.201691 0.358623
v 0.162600 0.210392 0.339165
v 0.150443 0.211068 0.350171
v 0.153463 0.215098 0.342772
v 0.147747 0.222245 0.337643
v 0.164513 0.211768 0.328603
v 0.164919 0.212068 0.315500
v 0.155350 0.218319 0.328603
v 0.155771 0.218619 0.315500
v 0.148799 0.222996 0.328603
v 0.149219 0.223297 0.315500
v 0.139948 0.215178 0.351944
v 0.144325 0.219803 0.346378
v 0.135591 0.222896 0.349492
v 0.139948 0.225088 0.341889
v 0.126832 0.214793 0.355998
v 0.126832 0.225358 0.351160
v 0.127466 0.232068 0.342562
v 0.139934 0.228952 0.328603
v 0.139934 0.229527 0.315500
v 0.132227 0.233852 0.328603
v 0.132761 0.234126 0.315500
v 0.123521 0.236115 0.338766
v 0.125675 0.237223 0.328603
v 0.126209 0.237498 0.315500
v 0.113729 0.214793 0.357744
v 0.114377 0.228865 0.352525
v 0.119177 0.233879 0.347500
v 0.100627 0.214793 0.358359
v 0.100627 0.227896 0.356239
v 0.110442 0.236127 0.349633
v 0.114377 0.238805 0.342562
v 0.100627 0.238474 0.351319
v 0.101410 0.245259 0.342440
v 0.097565 0.248976 0.338563
v 0.113729 0.243372 0.328603
v 0.113729 0.243922 0.315500
v 0.106395 0.247146 0.328603
v 0.106929 0.247421 0.315500
v 0.099844 0.249948 0.328603
v 0.100378 0.250207 0.315500
v 0.091951 0.114488 0.338747
v 0.087525 0.126732 0.350088
v 0.087560 0.120480 0.342551
v 0.080678 0.129418 0.348513
v 0.077961 0.127482 0.341705
v 0.090535 0.113131 0.328603
v 0.090182 0.112792 0.315500
v 0.083984 0.118800 0.328603
v 0.083631 0.118500 0.315500
v 0.074971 0.125351 0.328603
v 0.074550 0.125051 0.315500
v 0.087525 0.136179 0.354629
v 0.087525 0.149282 0.357981
v 0.075555 0.136478 0.350903
v 0.071410 0.131974 0.341705
v 0.074422 0.149282 0.356292
v 0.068420 0.130008 0.328603
v 0.067999 0.129719 0.315500
v 0.064601 0.141045 0.349636
v 0.060668 0.138364 0.342564
v 0.060668 0.148311 0.352528
v 0.055866 0.143296 0.347504
v 0.051091 0.141060 0.338769
v 0.048218 0.151466 0.351474
v 0.047322 0.144622 0.342564
v 0.061320 0.133778 0.328603
v 0.061320 0.133214 0.315500
v 0.047322 0.140443 0.329227
v 0.048218 0.139518 0.315500
v 0.042356 0.142971 0.334011
v 0.087525 0.162384 0.358623
v 0.087525 0.175486 0.358623
v 0.074422 0.162384 0.358360
v 0.074422 0.175486 0.358623
v 0.087525 0.188589 0.358623
v 0.087525 0.201691 0.358623
v 0.074422 0.188589 0.358623
v 0.074422 0.201691 0.358623
v 0.061320 0.162384 0.357745
v 0.061320 0.175486 0.358623
v 0.048218 0.162384 0.356491
v 0.048218 0.175486 0.358457
v 0.061320 0.188589 0.358623
v 0.061320 0.201691 0.358623
v 0.048218 0.188589 0.358623
v 0.048218 0.201691 0.358623
v 0.035115 0.153943 0.350017
v 0.035115 0.148896 0.341705
v 0.026457 0.155335 0.348949
v 0.022059 0.153028 0.342615
v 0.041368 0.142626 0.325276
v 0.041218 0.142574 0.315500
v 0.036246 0.144785 0.329227
v 0.034667 0.144860 0.315500
v 0.022013 0.149061 0.328603
v 0.022013 0.148554 0.315500
v 0.008911 0.154132 0.339737
v -0.004192 0.155039 0.338330
v 0.008911 0.151934 0.328603
v 0.008911 0.151435 0.315500
v -0.004192 0.153751 0.328603
v -0.004192 0.153257 0.315500
v 0.035115 0.162384 0.354668
v 0.035115 0.175486 0.358091
v 0.022059 0.161346 0.352131
v 0.017722 0.156287 0.347589
v 0.022013 0.175486 0.357763
v 0.035115 0.188589 0.358623
v 0.035115 0.201691 0.358623
v 0.022013 0.188589 0.358623
v 0.022013 0.201691 0.358623
v 0.008911 0.163725 0.352149
v 0.008911 0.157174 0.346289
v 0.008911 0.175486 0.357333
v -0.004192 0.164605 0.351706
v -0.004192 0.158054 0.344881
v -0.004192 0.175486 0.356881
v 0.008911 0.188589 0.358623
v 0.008911 0.201691 0.358623
v -0.004192 0.188589 0.358615
v -0.004192 0.201691 0.358623
v -0.017294 0.155500 0.336822
v -0.030396 0.155656 0.336040
v -0.017294 0.154678 0.328603
v -0.017294 0.154188 0.315500
v -0.030396 0.154990 0.328603
v -0.030396 0.154501 0.315500
v -0.043499 0.155359 0.337317
v -0.056601 0.154705 0.338918
v -0.043499 0.154396 0.328603
v -0.043499 0.153906 0.315500
v -0.056601 0.153086 0.328603
v -0.056601 0.152594 0.315500
v -0.017294 0.165039 0.351422
v -0.017294 0.158488 0.343373
v -0.017294 0.175486 0.356546
v -0.030396 0.165193 0.351322
v -0.030396 0.158642 0.342591
v -0.030396 0.175486 0.356417
v -0.017294 0.188589 0.358564
v -0.017294 0.201691 0.358624
v -0.030396 0.188589 0.358536
v -0.030396 0.201691 0.358624
v -0.043499 0.164898 0.351517
v -0.043499 0.158346 0.343868
v -0.043499 0.175486 0.356664
v -0.056601 0.164256 0.351931
v -0.056601 0.157705 0.345469
v -0.056601 0.175486 0.357115
v -0.043499 0.188589 0.358586
v -0.043499 0.201691 0.358624
v -0.056601 0.188589 0.358624
v -0.056601 0.201691 0.358624
v -0.069704 0.153698 0.340391
v -0.086068 0.155028 0.349157
v -0.082143 0.152548 0.342834
v -0.069704 0.151068 0.328603
v -0.069704 0.150573 0.315500
v -0.082806 0.148327 0.328603
v -0.082806 0.147827 0.315500
v -0.095908 0.153692 0.350199
v -0.095908 0.148457 0.341705
v -0.111987 0.141459 0.338338
v -0.109011 0.151650 0.351471
v -0.108176 0.144769 0.342305
v -0.102129 0.142630 0.325263
v -0.101964 0.142580 0.315500
v -0.097020 0.144492 0.329219
v -0.095413 0.144501 0.315500
v -0.108176 0.140937 0.329219
v -0.109011 0.140154 0.315500
v -0.103252 0.142971 0.333998
v -0.069704 0.163271 0.352359
v -0.069704 0.156720 0.346942
v -0.069704 0.175486 0.357542
v -0.082143 0.161196 0.352324
v -0.077333 0.156037 0.347955
v -0.082806 0.175486 0.357850
v -0.069704 0.188589 0.358624
v -0.069704 0.201691 0.358624
v -0.082806 0.188589 0.358624
v -0.082806 0.201691 0.358624
v -0.095908 0.162384 0.354915
v -0.095908 0.175486 0.358156
v -0.109011 0.162384 0.356505
v -0.109011 0.175486 0.358473
v -0.095908 0.188589 0.358624
v -0.095908 0.201691 0.358624
v -0.109011 0.188589 0.358624
v -0.109011 0.201691 0.358624
v 0.087525 0.214793 0.358623
v 0.087525 0.227896 0.357729
v 0.074422 0.214793 0.358623
v 0.074422 0.227896 0.358171
v 0.087663 0.241902 0.352233
v 0.092123 0.246872 0.347298
v 0.083388 0.248387 0.349164
v 0.087663 0.250673 0.342440
v 0.074422 0.240998 0.355066
v 0.074422 0.249942 0.350335
v 0.073267 0.256470 0.340650
v 0.087525 0.254619 0.328603
v 0.087525 0.255137 0.315500
v 0.075556 0.258772 0.328603
v 0.076302 0.259031 0.315500
v 0.061320 0.214793 0.358623
v 0.061320 0.227896 0.358504
v 0.048218 0.214793 0.358623
v 0.048218 0.227896 0.358623
v 0.061320 0.240998 0.356774
v 0.061320 0.252031 0.351709
v 0.061320 0.258582 0.344480
v 0.048218 0.240998 0.357677
v 0.047284 0.254964 0.351756
v 0.051030 0.259906 0.347162
v 0.068130 0.260741 0.335580
v 0.069005 0.261045 0.328603
v 0.069751 0.261304 0.315500
v 0.061320 0.261680 0.337928
v 0.042295 0.260777 0.348440
v 0.047284 0.262787 0.342359
v 0.061320 0.263217 0.328603
v 0.061320 0.263725 0.315500
v 0.048218 0.266301 0.328603
v 0.048218 0.266800 0.315500
v 0.035115 0.214793 0.358623
v 0.035115 0.227896 0.358623
v 0.022013 0.214793 0.358623
v 0.022013 0.227896 0.358623
v 0.035115 0.240998 0.357932
v 0.035115 0.254100 0.353660
v 0.022013 0.240998 0.358183
v 0.022013 0.254100 0.354922
v 0.008911 0.214793 0.358623
v 0.008911 0.227896 0.358623
v -0.004192 0.214793 0.358623
v -0.004192 0.227896 0.358623
v 0.008911 0.240998 0.358348
v 0.008911 0.254100 0.355604
v -0.004192 0.240998 0.358432
v -0.004192 0.254100 0.355967
v 0.035115 0.261492 0.349167
v 0.035115 0.265373 0.341705
v 0.022013 0.262696 0.350179
v 0.022013 0.267755 0.341705
v 0.035115 0.268912 0.328603
v 0.035115 0.269410 0.315500
v 0.022013 0.271263 0.328603
v 0.022013 0.271757 0.315500
v 0.008911 0.263458 0.350695
v 0.008911 0.269251 0.341705
v -0.004192 0.263878 0.350976
v -0.004192 0.270092 0.341705
v 0.008911 0.272729 0.328603
v 0.008911 0.273218 0.315500
v -0.003241 0.273461 0.329657
v 0.001460 0.273696 0.315500
v -0.006975 0.273996 0.325993
v -0.005091 0.274116 0.315500
v -0.017294 0.214793 0.358624
v -0.017294 0.227896 0.358624
v -0.030396 0.214793 0.358624
v -0.030396 0.227896 0.358624
v -0.017294 0.240998 0.358515
v -0.017294 0.254100 0.356331
v -0.030396 0.240998 0.358548
v -0.030396 0.254100 0.356471
v -0.043499 0.214793 0.358624
v -0.043499 0.227896 0.358624
v -0.056601 0.214793 0.358624
v -0.056601 0.227896 0.358624
v -0.043499 0.240998 0.358500
v -0.043499 0.254100 0.356262
v -0.056601 0.240998 0.358394
v -0.056601 0.254100 0.355813
v -0.017294 0.264298 0.351256
v -0.016779 0.271379 0.340982
v -0.020802 0.273949 0.336133
v -0.030396 0.264455 0.351362
v -0.030396 0.271006 0.342897
v -0.030396 0.273991 0.336346
v -0.012067 0.273669 0.334728
v -0.016779 0.274329 0.329657
v -0.017294 0.274899 0.315500
v -0.030396 0.274718 0.328603
v -0.030396 0.275208 0.315500
v -0.043499 0.264214 0.351202
v -0.043687 0.271288 0.340761
v -0.039445 0.273875 0.335764
v -0.056601 0.263709 0.350859
v -0.056601 0.269761 0.341705
v -0.048180 0.273628 0.334525
v -0.043687 0.274216 0.329536
v -0.043499 0.274727 0.315500
v -0.056769 0.273227 0.329536
v -0.060296 0.273435 0.315500
v -0.052513 0.273955 0.325790
v -0.053745 0.274056 0.315500
v -0.069704 0.214793 0.358624
v -0.069704 0.227896 0.358624
v -0.082806 0.214793 0.358624
v -0.082806 0.227896 0.358624
v -0.069704 0.240998 0.358235
v -0.069704 0.254100 0.355141
v -0.082806 0.240998 0.358026
v -0.082806 0.254100 0.354259
v -0.095908 0.214793 0.358624
v -0.095908 0.227896 0.358624
v -0.109011 0.214793 0.358624
v -0.109011 0.227896 0.358600
v -0.095908 0.240998 0.357771
v -0.096055 0.255154 0.352138
v -0.100520 0.260224 0.347634
v -0.109011 0.240998 0.357191
v -0.109011 0.252669 0.352031
v -0.109011 0.259221 0.346183
v -0.069704 0.262948 0.350346
v -0.069704 0.268254 0.341705
v -0.082806 0.261939 0.349673
v -0.082806 0.266256 0.341705
v -0.069704 0.271756 0.328603
v -0.069704 0.272250 0.315500
v -0.082806 0.269781 0.328603
v -0.082806 0.270278 0.315500
v -0.091785 0.261133 0.348951
v -0.096055 0.263415 0.342642
v -0.109011 0.262293 0.339631
v -0.095908 0.267340 0.328603
v -0.095908 0.267840 0.315500
v -0.109011 0.264437 0.328603
v -0.109011 0.264940 0.315500
v -0.191941 0.102169 0.338182
v -0.190325 0.101262 0.328603
v -0.189826 0.100982 0.315500
v -0.204738 0.101998 0.349466
v -0.200513 0.099592 0.342212
v -0.209090 0.101998 0.349466
v -0.212925 0.097724 0.340395
v -0.200727 0.095424 0.328603
v -0.200727 0.094863 0.315500
v -0.215203 0.095164 0.328603
v -0.215529 0.094977 0.315500
v -0.140484 0.129031 0.337355
v -0.139262 0.128464 0.328603
v -0.138683 0.128194 0.315500
v -0.126583 0.141871 0.349166
v -0.122174 0.139646 0.342305
v -0.122174 0.148475 0.352157
v -0.117848 0.143571 0.347073
v -0.135215 0.140007 0.350482
v -0.135756 0.133505 0.341716
v -0.135215 0.149282 0.355223
v -0.122113 0.135783 0.328603
v -0.122113 0.135260 0.315500
v -0.132711 0.131399 0.328603
v -0.132131 0.131135 0.315500
v -0.153870 0.129114 0.348940
v -0.149029 0.127312 0.341716
v -0.166690 0.115807 0.337484
v -0.161420 0.127137 0.350284
v -0.161962 0.120745 0.341793
v -0.148318 0.124064 0.328603
v -0.148318 0.123520 0.315500
v -0.165550 0.115167 0.328603
v -0.165051 0.114887 0.315500
v -0.158999 0.118677 0.328603
v -0.158500 0.118402 0.315500
v -0.149029 0.135827 0.351641
v -0.145135 0.131224 0.346090
v -0.148318 0.149282 0.357061
v -0.161420 0.136179 0.354930
v -0.161420 0.149282 0.358086
v -0.122113 0.162384 0.357634
v -0.122113 0.175486 0.358624
v -0.135215 0.162384 0.358181
v -0.135215 0.175486 0.358624
v -0.122113 0.188589 0.358624
v -0.122113 0.201691 0.358624
v -0.135215 0.188589 0.358624
v -0.135215 0.201691 0.358624
v -0.148318 0.162384 0.358527
v -0.148318 0.175486 0.358624
v -0.161420 0.162384 0.358624
v -0.161420 0.175486 0.358624
v -0.148318 0.188589 0.358624
v -0.148318 0.201691 0.358624
v -0.161420 0.188589 0.358624
v -0.161420 0.201691 0.358624
v -0.179486 0.115635 0.349154
v -0.174880 0.113658 0.341793
v -0.174880 0.122703 0.351774
v -0.170751 0.118086 0.346219
v -0.187625 0.113351 0.350674
v -0.187594 0.106843 0.342212
v -0.187625 0.123077 0.355330
v -0.174522 0.110131 0.328603
v -0.174522 0.109571 0.315500
v -0.183774 0.104939 0.328603
v -0.183274 0.104659 0.315500
v -0.174522 0.136179 0.357043
v -0.174522 0.149282 0.358503
v -0.187625 0.136179 0.357952
v -0.187625 0.149282 0.358334
v -0.200513 0.109280 0.351331
v -0.196003 0.104449 0.346917
v -0.200727 0.123077 0.354832
v -0.209996 0.109975 0.350355
v -0.215695 0.109975 0.341705
v -0.209996 0.123077 0.350640
v -0.215695 0.123077 0.341705
v -0.219166 0.109975 0.328603
v -0.219654 0.109975 0.315500
v -0.219166 0.123077 0.328603
v -0.219654 0.123077 0.315500
v -0.200727 0.136179 0.355535
v -0.200727 0.149282 0.355535
v -0.209996 0.136179 0.350640
v -0.215695 0.136179 0.341705
v -0.209996 0.149282 0.350640
v -0.215695 0.149282 0.341705
v -0.219166 0.136179 0.328603
v -0.219654 0.136179 0.315500
v -0.219166 0.149282 0.328603
v -0.219654 0.149282 0.315500
v -0.174522 0.162384 0.358624
v -0.174522 0.175486 0.358624
v -0.187625 0.162384 0.358334
v -0.187625 0.175486 0.358334
v -0.174522 0.188589 0.358624
v -0.174522 0.201691 0.358624
v -0.187625 0.188589 0.358334
v -0.187625 0.201691 0.358334
v -0.200727 0.162384 0.355535
v -0.200727 0.175486 0.355535
v -0.209996 0.162384 0.350640
v -0.215695 0.162384 0.341705
v -0.209996 0.175486 0.350640
v -0.215695 0.175486 0.341705
v -0.219166 0.162384 0.328603
v -0.219654 0.162384 0.315500
v -0.219166 0.175486 0.328603
v -0.219654 0.175486 0.315500
v -0.200727 0.188589 0.355535
v -0.200727 0.201691 0.355535
v -0.209996 0.188589 0.350640
v -0.215695 0.188589 0.341705
v -0.209996 0.201691 0.350640
v -0.215695 0.201691 0.341705
v -0.219166 0.188589 0.328603
v -0.219654 0.188589 0.315500
v -0.219166 0.201691 0.328603
v -0.219654 0.201691 0.315500
v -0.122113 0.214793 0.358624
v -0.122113 0.227896 0.358397
v -0.135215 0.214793 0.358624
v -0.135215 0.227896 0.358022
v -0.122113 0.240998 0.355982
v -0.122113 0.250968 0.351025
v -0.122060 0.257767 0.341729
v -0.135215 0.240998 0.354278
v -0.135215 0.249047 0.349696
v -0.135215 0.253656 0.341705
v -0.126170 0.259958 0.328603
v -0.127082 0.260212 0.315500
v -0.135215 0.257277 0.328603
v -0.135215 0.257787 0.315500
v -0.148318 0.214793 0.358624
v -0.148318 0.227896 0.357448
v -0.161420 0.214793 0.358400
v -0.161420 0.227896 0.356100
v -0.147628 0.241628 0.351741
v -0.151536 0.246416 0.346654
v -0.142801 0.247874 0.348721
v -0.147628 0.249773 0.342054
v -0.161420 0.238128 0.351140
v -0.161786 0.244913 0.342054
v -0.157662 0.248521 0.337919
v -0.148318 0.253136 0.328603
v -0.148318 0.253651 0.315500
v -0.166353 0.246960 0.328603
v -0.167097 0.247221 0.315500
v -0.159802 0.249265 0.328603
v -0.160546 0.249524 0.315500
v -0.117658 0.261223 0.337378
v -0.119618 0.261761 0.328603
v -0.120531 0.262012 0.315500
v -0.174522 0.214793 0.357940
v -0.174522 0.227896 0.353847
v -0.187625 0.214793 0.356926
v -0.186346 0.228155 0.351178
v -0.189862 0.232695 0.345728
v -0.174522 0.235718 0.349346
v -0.174522 0.240178 0.341705
v -0.181127 0.234467 0.348285
v -0.186346 0.235984 0.341498
v -0.174522 0.243890 0.328603
v -0.174522 0.244412 0.315500
v -0.187625 0.238784 0.328603
v -0.187625 0.239309 0.315500
v -0.200727 0.214793 0.354068
v -0.200727 0.223937 0.350429
v -0.200000 0.230452 0.341498
v -0.209996 0.214793 0.350123
v -0.215695 0.214793 0.341705
v -0.209090 0.222185 0.349155
v -0.211487 0.224215 0.341705
v -0.202833 0.232640 0.328603
v -0.203481 0.232903 0.315500
v -0.219166 0.214793 0.328603
v -0.219654 0.214793 0.315500
v -0.213222 0.226088 0.328603
v -0.213466 0.226352 0.315500
v -0.195148 0.234842 0.336993
v -0.196282 0.235303 0.328603
v -0.196930 0.235567 0.315500
v 0.267678 0.005156 0.302398
v 0.267187 0.005156 0.289295
v 0.266772 0.018258 0.302398
v 0.266282 0.018258 0.289295
v 0.265552 0.005156 0.278947
v 0.265099 0.018258 0.279845
v 0.262562 0.005156 0.272395
v 0.256011 0.005156 0.265938
v 0.262109 0.018258 0.273294
v 0.255558 0.018258 0.266239
v 0.265632 0.031361 0.302398
v 0.265083 0.032242 0.288438
v 0.264676 0.039169 0.302398
v 0.264586 0.038750 0.292234
v 0.264253 0.037197 0.283499
v 0.263271 0.045720 0.302398
v 0.263206 0.043656 0.288438
v 0.264717 0.028462 0.281185
v 0.261992 0.032242 0.276568
v 0.254953 0.031361 0.266664
v 0.259490 0.044463 0.276193
v 0.253871 0.044463 0.267397
v 0.260730 0.057565 0.302398
v 0.260230 0.057565 0.289295
v 0.257794 0.070668 0.302398
v 0.257283 0.070668 0.289295
v 0.256679 0.057565 0.276193
v 0.252466 0.057565 0.268413
v 0.253675 0.070214 0.275570
v 0.251610 0.065545 0.269193
v 0.253818 0.083770 0.302398
v 0.253093 0.084557 0.288905
v 0.251338 0.090412 0.302398
v 0.251326 0.090382 0.293011
v 0.252609 0.080715 0.279522
v 0.244753 0.005156 0.260755
v 0.244753 0.018258 0.261074
v 0.231650 0.005156 0.259278
v 0.231650 0.018258 0.259294
v 0.244753 0.031361 0.261610
v 0.244753 0.044463 0.262574
v 0.231650 0.031361 0.259406
v 0.231650 0.044463 0.259637
v 0.218548 0.005156 0.259278
v 0.218548 0.018258 0.259278
v 0.205446 0.005156 0.259278
v 0.205446 0.018258 0.259278
v 0.218548 0.031361 0.259278
v 0.218548 0.044463 0.259278
v 0.205446 0.031361 0.259278
v 0.205446 0.044463 0.259278
v 0.244753 0.057565 0.263863
v 0.250487 0.074280 0.270788
v 0.245573 0.070214 0.266048
v 0.231650 0.057565 0.259911
v 0.231650 0.070668 0.260303
v 0.250979 0.089450 0.284277
v 0.248892 0.096963 0.302398
v 0.248970 0.095598 0.288905
v 0.249150 0.084557 0.275570
v 0.242304 0.083770 0.266507
v 0.244698 0.096872 0.276193
v 0.239858 0.096872 0.268153
v 0.231650 0.083770 0.261513
v 0.231650 0.096872 0.263575
v 0.218548 0.057565 0.259278
v 0.218548 0.070668 0.259278
v 0.205446 0.057565 0.259278
v 0.205446 0.070668 0.259278
v 0.218548 0.083770 0.259465
v 0.218548 0.096872 0.259881
v 0.205446 0.083770 0.259278
v 0.205446 0.096872 0.259278
v 0.243799 0.109975 0.302398
v 0.243258 0.109975 0.289295
v 0.239660 0.119160 0.302398
v 0.239380 0.118655 0.289295
v 0.236032 0.125711 0.302398
v 0.235753 0.125206 0.289295
v 0.240182 0.109129 0.276197
v 0.238490 0.104197 0.269237
v 0.238801 0.117609 0.280567
v 0.236528 0.112932 0.271833
v 0.231957 0.109129 0.266487
v 0.233652 0.122416 0.276197
v 0.227327 0.123077 0.267906
v 0.230236 0.136179 0.302398
v 0.229677 0.136179 0.289295
v 0.225854 0.144093 0.302398
v 0.225574 0.143589 0.289295
v 0.226873 0.135168 0.277159
v 0.225375 0.130127 0.269280
v 0.225230 0.142966 0.282169
v 0.218548 0.109975 0.260965
v 0.218548 0.123077 0.263329
v 0.205446 0.109975 0.259423
v 0.205446 0.123077 0.259883
v 0.221504 0.150644 0.302398
v 0.221196 0.150140 0.289295
v 0.222957 0.138862 0.273435
v 0.218573 0.135168 0.266729
v 0.218257 0.148783 0.276468
v 0.214222 0.145864 0.267989
v 0.205446 0.136179 0.261354
v 0.211050 0.154599 0.270766
v 0.206188 0.149852 0.265475
v 0.214953 0.159682 0.302398
v 0.214645 0.159281 0.289295
v 0.209922 0.166233 0.302398
v 0.209614 0.165832 0.289295
v 0.203371 0.174764 0.302398
v 0.203063 0.174362 0.289295
v 0.213557 0.157864 0.279501
v 0.207771 0.162292 0.275558
v 0.201510 0.162384 0.267940
v 0.200874 0.171513 0.276193
v 0.198961 0.169021 0.269563
v 0.192343 0.005156 0.259278
v 0.192343 0.018258 0.259278
v 0.179241 0.005156 0.259278
v 0.179241 0.018258 0.259278
v 0.192343 0.031361 0.259278
v 0.192343 0.044463 0.259278
v 0.179241 0.031361 0.259278
v 0.179241 0.044463 0.259278
v 0.166139 0.005156 0.260112
v 0.166139 0.018258 0.260020
v 0.146642 0.000822 0.269876
v 0.151820 0.005176 0.266027
v 0.153036 0.018258 0.264482
v 0.166139 0.031361 0.259838
v 0.166139 0.044463 0.259562
v 0.153036 0.031361 0.263453
v 0.153036 0.044463 0.262187
v 0.192343 0.057565 0.259278
v 0.192343 0.070668 0.259278
v 0.179241 0.057565 0.259278
v 0.179241 0.070668 0.259278
v 0.192343 0.083770 0.259278
v 0.192343 0.096872 0.259278
v 0.179241 0.083770 0.259278
v 0.179241 0.096872 0.259278
v 0.166139 0.057565 0.259350
v 0.166139 0.070668 0.259278
v 0.153036 0.057565 0.260863
v 0.153036 0.070668 0.259959
v 0.166139 0.083770 0.259278
v 0.166139 0.096872 0.259278
v 0.153036 0.083770 0.259497
v 0.153036 0.096872 0.259278
v 0.139530 0.005156 0.302398
v 0.140021 0.005156 0.289296
v 0.138408 0.018258 0.302398
v 0.138904 0.018258 0.289296
v 0.144004 0.005176 0.275023
v 0.146333 0.009557 0.269415
v 0.142421 0.018258 0.276193
v 0.145964 0.018258 0.268922
v 0.136316 0.031361 0.302398
v 0.136817 0.031361 0.289296
v 0.134133 0.041345 0.302398
v 0.134384 0.042035 0.289296
v 0.132200 0.047896 0.302398
v 0.132462 0.048586 0.289296
v 0.140371 0.031361 0.276193
v 0.144954 0.031361 0.268075
v 0.136617 0.045078 0.276300
v 0.143352 0.044463 0.267085
v 0.132944 0.049856 0.280738
v 0.128532 0.057565 0.302398
v 0.129055 0.057565 0.289296
v 0.123163 0.069519 0.302398
v 0.123425 0.070020 0.289296
v 0.134671 0.057565 0.271445
v 0.141222 0.057565 0.265973
v 0.133413 0.064197 0.269685
v 0.138642 0.069406 0.265065
v 0.131481 0.057565 0.277996
v 0.126896 0.070659 0.276094
v 0.131240 0.072932 0.268015
v 0.139934 0.083770 0.261337
v 0.139934 0.096872 0.259859
v 0.122505 0.081148 0.273768
v 0.126856 0.084818 0.266728
v 0.126832 0.096872 0.262981
v 0.119637 0.076070 0.302398
v 0.119917 0.076571 0.289296
v 0.120225 0.077120 0.282503
v 0.114735 0.083770 0.302398
v 0.115325 0.083770 0.289296
v 0.108827 0.092449 0.302398
v 0.109137 0.092849 0.289296
v 0.103566 0.099000 0.302398
v 0.103919 0.099400 0.289296
v 0.118331 0.084818 0.277358
v 0.119941 0.089883 0.269241
v 0.110888 0.096733 0.275340
v 0.117233 0.096872 0.267582
v 0.105241 0.101007 0.279138
v 0.192343 0.109975 0.259278
v 0.192343 0.123077 0.259278
v 0.179241 0.109975 0.259278
v 0.179241 0.123077 0.259278
v 0.192343 0.136179 0.259543
v 0.192343 0.149282 0.260636
v 0.179241 0.136179 0.259278
v 0.179241 0.149282 0.259423
v 0.166139 0.109975 0.259278
v 0.166139 0.123077 0.259278
v 0.153036 0.109975 0.259278
v 0.153036 0.123077 0.259278
v 0.166139 0.136179 0.259278
v 0.166139 0.149282 0.259278
v 0.153036 0.136179 0.259278
v 0.153036 0.149282 0.259278
v 0.198161 0.181315 0.302398
v 0.197809 0.180913 0.289295
v 0.192343 0.162384 0.263449
v 0.195309 0.178064 0.276193
v 0.191360 0.174228 0.267619
v 0.179241 0.162384 0.260057
v 0.179241 0.175486 0.262678
v 0.191610 0.187647 0.302398
v 0.191258 0.187308 0.289295
v 0.184816 0.194199 0.302398
v 0.184464 0.193859 0.289296
v 0.178265 0.200515 0.302398
v 0.177913 0.200176 0.289296
v 0.188758 0.184897 0.276193
v 0.186337 0.182563 0.269076
v 0.181963 0.191448 0.276193
v 0.178160 0.187594 0.267470
v 0.175412 0.197765 0.276193
v 0.173072 0.195509 0.269245
v 0.166139 0.162384 0.259366
v 0.166139 0.175486 0.260071
v 0.153036 0.162384 0.259278
v 0.153036 0.175486 0.259383
v 0.171471 0.207066 0.302398
v 0.171064 0.206727 0.289296
v 0.166139 0.188589 0.262931
v 0.166636 0.204925 0.275097
v 0.166139 0.198472 0.267408
v 0.153036 0.188589 0.260232
v 0.159177 0.207949 0.269999
v 0.154100 0.202825 0.265026
v 0.139934 0.109975 0.259390
v 0.139934 0.123077 0.259278
v 0.126832 0.109975 0.260450
v 0.126832 0.123077 0.259506
v 0.139934 0.136179 0.259278
v 0.139934 0.149282 0.259278
v 0.126832 0.136179 0.259278
v 0.126832 0.149282 0.259278
v 0.097015 0.106241 0.302398
v 0.097368 0.106580 0.289296
v 0.107822 0.104254 0.270403
v 0.112805 0.109162 0.265114
v 0.113729 0.123077 0.260781
v 0.100033 0.109371 0.274778
v 0.103559 0.112989 0.267591
v 0.094824 0.117244 0.270418
v 0.099766 0.122197 0.265205
v 0.113729 0.136179 0.259500
v 0.113729 0.149282 0.259278
v 0.100627 0.136179 0.260585
v 0.100627 0.149282 0.259410
v 0.139934 0.162384 0.259278
v 0.139934 0.175486 0.259278
v 0.126832 0.162384 0.259278
v 0.126832 0.175486 0.259278
v 0.139934 0.188589 0.259471
v 0.139934 0.201691 0.260971
v 0.126832 0.188589 0.259278
v 0.126832 0.201691 0.259623
v 0.113729 0.162384 0.259278
v 0.113729 0.175486 0.259278
v 0.100627 0.162384 0.259278
v 0.100627 0.175486 0.259278
v 0.113729 0.188589 0.259278
v 0.113729 0.201691 0.259278
v 0.100627 0.188589 0.259278
v 0.100627 0.201691 0.259278
v 0.164919 0.212068 0.302398
v 0.164513 0.211768 0.289296
v 0.155771 0.218619 0.302398
v 0.155350 0.218319 0.289296
v 0.149219 0.223297 0.302398
v 0.148799 0.222996 0.289296
v 0.162600 0.210393 0.278734
v 0.153462 0.215097 0.275127
v 0.150442 0.211067 0.267728
v 0.147747 0.222245 0.280256
v 0.139934 0.229527 0.302398
v 0.139934 0.228952 0.289296
v 0.132761 0.234126 0.302398
v 0.132226 0.233851 0.289296
v 0.144324 0.219802 0.271521
v 0.139948 0.215178 0.265956
v 0.139948 0.225088 0.276010
v 0.135589 0.222895 0.268407
v 0.126832 0.214793 0.261903
v 0.127465 0.232067 0.275337
v 0.126832 0.225356 0.266740
v 0.126209 0.237498 0.302398
v 0.125675 0.237223 0.289296
v 0.123521 0.236114 0.279134
v 0.113729 0.214793 0.260157
v 0.119175 0.233878 0.270399
v 0.114376 0.228864 0.265374
v 0.100627 0.214793 0.259542
v 0.100627 0.227896 0.261662
v 0.113729 0.243922 0.302398
v 0.113729 0.243371 0.289296
v 0.106929 0.247421 0.302398
v 0.106395 0.247146 0.289296
v 0.100378 0.250207 0.302398
v 0.099844 0.249947 0.289296
v 0.114376 0.238804 0.275337
v 0.110440 0.236126 0.268266
v 0.101410 0.245258 0.275459
v 0.100627 0.238473 0.266580
v 0.097565 0.248975 0.279336
v 0.090182 0.112792 0.302398
v 0.090535 0.113131 0.289296
v 0.083631 0.118500 0.302398
v 0.083984 0.118801 0.289296
v 0.074550 0.125051 0.302398
v 0.074971 0.125352 0.289296
v 0.091951 0.114488 0.279152
v 0.087560 0.120481 0.275348
v 0.087525 0.126734 0.267811
v 0.077962 0.127483 0.276193
v 0.080679 0.129418 0.269386
v 0.067999 0.129719 0.302398
v 0.068420 0.130008 0.289296
v 0.087525 0.136179 0.263272
v 0.087525 0.149282 0.259920
v 0.071411 0.131975 0.276193
v 0.075556 0.136479 0.266997
v 0.074422 0.149282 0.261609
v 0.061320 0.133214 0.302398
v 0.061320 0.133779 0.289296
v 0.048218 0.139518 0.302398
v 0.047322 0.140443 0.288672
v 0.042357 0.142971 0.283889
v 0.060669 0.138365 0.275335
v 0.064603 0.141046 0.268263
v 0.055868 0.143297 0.270396
v 0.060669 0.148311 0.265372
v 0.051092 0.141060 0.279131
v 0.047322 0.144623 0.275335
v 0.048218 0.151467 0.266426
v 0.087525 0.162384 0.259278
v 0.087525 0.175486 0.259278
v 0.074422 0.162384 0.259542
v 0.074422 0.175486 0.259278
v 0.087525 0.188589 0.259278
v 0.087525 0.201691 0.259278
v 0.074422 0.188589 0.259278
v 0.074422 0.201691 0.259278
v 0.061320 0.162384 0.260156
v 0.061320 0.175486 0.259278
v 0.048218 0.162384 0.261410
v 0.048218 0.175486 0.259444
v 0.061320 0.188589 0.259278
v 0.061320 0.201691 0.259278
v 0.048218 0.188589 0.259278
v 0.048218 0.201691 0.259278
v 0.041218 0.142574 0.302398
v 0.041368 0.142626 0.292623
v 0.034667 0.144860 0.302398
v 0.036246 0.144786 0.288672
v 0.022013 0.148554 0.302398
v 0.022013 0.149062 0.289296
v 0.035115 0.148898 0.276193
v 0.035115 0.153944 0.267884
v 0.022061 0.153029 0.275284
v 0.026461 0.155335 0.268950
v 0.008911 0.151435 0.302398
v 0.008911 0.151934 0.289296
v -0.004192 0.153257 0.302398
v -0.004192 0.153752 0.289296
v 0.008911 0.154133 0.278163
v -0.004192 0.155039 0.279570
v 0.035115 0.162384 0.263234
v 0.035115 0.175486 0.259810
v 0.017726 0.156288 0.270311
v 0.022061 0.161347 0.265769
v 0.022013 0.175486 0.260138
v 0.035115 0.188589 0.259278
v 0.035115 0.201691 0.259278
v 0.022013 0.188589 0.259278
v 0.022013 0.201691 0.259278
v 0.008911 0.157175 0.271612
v 0.008911 0.163726 0.265750
v 0.008911 0.175486 0.260568
v -0.004192 0.158055 0.273018
v -0.004192 0.164606 0.266194
v -0.004192 0.175486 0.261020
v 0.008911 0.188589 0.259278
v 0.008911 0.201691 0.259278
v -0.004192 0.188589 0.259286
v -0.004192 0.201691 0.259278
v -0.017294 0.154188 0.302398
v -0.017294 0.154678 0.289296
v -0.030396 0.154501 0.302398
v -0.030396 0.154991 0.289296
v -0.017294 0.155501 0.281078
v -0.030396 0.155657 0.281860
v -0.043499 0.153906 0.302398
v -0.043499 0.154396 0.289296
v -0.056601 0.152594 0.302398
v -0.056601 0.153086 0.289296
v -0.043499 0.155359 0.280583
v -0.056601 0.154706 0.278982
v -0.017294 0.158489 0.274527
v -0.017294 0.165040 0.266478
v -0.017294 0.175486 0.261355
v -0.030396 0.158643 0.275309
v -0.030396 0.165194 0.266578
v -0.030396 0.175486 0.261484
v -0.017294 0.188589 0.259337
v -0.017294 0.201691 0.259278
v -0.030396 0.188589 0.259366
v -0.030396 0.201691 0.259278
v -0.043499 0.158347 0.274032
v -0.043499 0.164899 0.266383
v -0.043499 0.175486 0.261238
v -0.056601 0.157706 0.272431
v -0.056601 0.164257 0.265969
v -0.056601 0.175486 0.260787
v -0.043499 0.188589 0.259315
v -0.043499 0.201691 0.259278
v -0.056601 0.188589 0.259278
v -0.056601 0.201691 0.259278
v -0.069704 0.150573 0.302398
v -0.069704 0.151069 0.289296
v -0.082806 0.147827 0.302398
v -0.082806 0.148327 0.289296
v -0.069704 0.153698 0.277509
v -0.082145 0.152549 0.275064
v -0.086071 0.155029 0.268742
v -0.101964 0.142580 0.302398
v -0.102129 0.142630 0.292636
v -0.095413 0.144501 0.302398
v -0.097020 0.144492 0.288679
v -0.109011 0.140154 0.302398
v -0.108176 0.140937 0.288679
v -0.103252 0.142971 0.283901
v -0.095908 0.148459 0.276193
v -0.095908 0.153693 0.267701
v -0.111987 0.141459 0.279562
v -0.108176 0.144770 0.275594
v -0.109011 0.151651 0.266429
v -0.069704 0.156721 0.270958
v -0.069704 0.163272 0.265541
v -0.069704 0.175486 0.260359
v -0.077336 0.156038 0.269944
v -0.082145 0.161197 0.265576
v -0.082806 0.175486 0.260052
v -0.069704 0.188589 0.259278
v -0.069704 0.201691 0.259278
v -0.082806 0.188589 0.259278
v -0.082806 0.201691 0.259278
v -0.095908 0.162384 0.262986
v -0.095908 0.175486 0.259745
v -0.109011 0.162384 0.261397
v -0.109011 0.175486 0.259428
v -0.095908 0.188589 0.259278
v -0.095908 0.201691 0.259278
v -0.109011 0.188589 0.259278
v -0.109011 0.201691 0.259278
v 0.087525 0.214793 0.259278
v 0.087525 0.227896 0.260172
v 0.074422 0.214793 0.259278
v 0.074422 0.227896 0.259730
v 0.087525 0.255137 0.302398
v 0.087525 0.254619 0.289296
v 0.076302 0.259031 0.302398
v 0.075556 0.258772 0.289296
v 0.092121 0.246871 0.270601
v 0.087662 0.241901 0.265668
v 0.087662 0.250672 0.275459
v 0.083386 0.248386 0.268735
v 0.074422 0.240998 0.262835
v 0.073267 0.256469 0.277248
v 0.074422 0.249941 0.267565
v 0.061320 0.214793 0.259278
v 0.061320 0.227896 0.259397
v 0.048218 0.214793 0.259278
v 0.048218 0.227896 0.259278
v 0.061320 0.240998 0.261128
v 0.061320 0.258581 0.273420
v 0.061320 0.252030 0.266191
v 0.048218 0.240998 0.260224
v 0.051026 0.259905 0.270737
v 0.047282 0.254963 0.266144
v 0.069751 0.261304 0.302398
v 0.069005 0.261045 0.289296
v 0.068129 0.260741 0.282319
v 0.061320 0.263725 0.302398
v 0.061320 0.263216 0.289296
v 0.048218 0.266800 0.302398
v 0.048218 0.266300 0.289296
v 0.061320 0.261680 0.279971
v 0.047282 0.262786 0.275540
v 0.042291 0.260776 0.269459
v 0.035115 0.214793 0.259278
v 0.035115 0.227896 0.259278
v 0.022013 0.214793 0.259278
v 0.022013 0.227896 0.259278
v 0.035115 0.240998 0.259969
v 0.035115 0.254100 0.264242
v 0.022013 0.240998 0.259718
v 0.022013 0.254100 0.262979
v 0.008911 0.214793 0.259278
v 0.008911 0.227896 0.259278
v -0.004192 0.214793 0.259278
v -0.004192 0.227896 0.259278
v 0.008911 0.240998 0.259553
v 0.008911 0.254100 0.262298
v -0.004192 0.240998 0.259470
v -0.004192 0.254100 0.261934
v 0.035115 0.269410 0.302398
v 0.035115 0.268911 0.289296
v 0.022013 0.271757 0.302398
v 0.022013 0.271262 0.289296
v 0.035115 0.265371 0.276193
v 0.035115 0.261491 0.268732
v 0.022013 0.267753 0.276193
v 0.022013 0.262695 0.267721
v 0.008911 0.273218 0.302398
v 0.008911 0.272728 0.289296
v 0.001460 0.273696 0.302398
v -0.003241 0.273461 0.288241
v -0.005091 0.274116 0.302398
v -0.006975 0.273996 0.291906
v 0.008911 0.269250 0.276193
v 0.008911 0.263457 0.267204
v -0.004192 0.270090 0.276193
v -0.004192 0.263877 0.266924
v -0.017294 0.214793 0.259278
v -0.017294 0.227896 0.259278
v -0.030396 0.214793 0.259278
v -0.030396 0.227896 0.259278
v -0.017294 0.240998 0.259386
v -0.017294 0.254100 0.261570
v -0.030396 0.240998 0.259353
v -0.030396 0.254100 0.261431
v -0.043499 0.214793 0.259278
v -0.043499 0.227896 0.259278
v -0.056601 0.214793 0.259278
v -0.056601 0.227896 0.259278
v -0.043499 0.240998 0.259401
v -0.043499 0.254100 0.261639
v -0.056601 0.240998 0.259507
v -0.056601 0.254100 0.262088
v -0.012070 0.273669 0.283171
v -0.017294 0.274899 0.302398
v -0.016780 0.274329 0.288241
v -0.030396 0.275208 0.302398
v -0.030396 0.274718 0.289296
v -0.016780 0.271378 0.276917
v -0.017294 0.264297 0.266644
v -0.020804 0.273949 0.281767
v -0.030396 0.271005 0.275003
v -0.030396 0.264454 0.266537
v -0.030396 0.273991 0.281554
v -0.048177 0.273628 0.283374
v -0.043499 0.274727 0.302398
v -0.043685 0.274216 0.288363
v -0.060296 0.273435 0.302398
v -0.056769 0.273227 0.288363
v -0.053745 0.274056 0.302398
v -0.052513 0.273955 0.292109
v -0.043685 0.271287 0.277138
v -0.043499 0.264213 0.266698
v -0.039442 0.273875 0.282135
v -0.056601 0.269759 0.276193
v -0.056601 0.263708 0.267041
v -0.069704 0.214793 0.259278
v -0.069704 0.227896 0.259278
v -0.082806 0.214793 0.259278
v -0.082806 0.227896 0.259278
v -0.069704 0.240998 0.259666
v -0.069704 0.254100 0.262761
v -0.082806 0.240998 0.259875
v -0.082806 0.254100 0.263643
v -0.095908 0.214793 0.259278
v -0.095908 0.227896 0.259278
v -0.109011 0.214793 0.259278
v -0.109011 0.227896 0.259301
v -0.095908 0.240998 0.260130
v -0.100515 0.260224 0.270265
v -0.096052 0.255154 0.265762
v -0.109011 0.240998 0.260711
v -0.109011 0.259220 0.271717
v -0.109011 0.252668 0.265869
v -0.069704 0.272250 0.302398
v -0.069704 0.271756 0.289296
v -0.082806 0.270278 0.302398
v -0.082806 0.269781 0.289296
v -0.069704 0.268252 0.276193
v -0.069704 0.262947 0.267554
v -0.082806 0.266254 0.276193
v -0.082806 0.261938 0.268227
v -0.095908 0.267840 0.302398
v -0.095908 0.267339 0.289296
v -0.109011 0.264940 0.302398
v -0.109011 0.264437 0.289296
v -0.096052 0.263415 0.275256
v -0.091780 0.261132 0.268949
v -0.109011 0.262293 0.278268
v -0.189826 0.100982 0.302398
v -0.190325 0.101262 0.289296
v -0.191942 0.102170 0.279717
v -0.200727 0.094863 0.302398
v -0.200727 0.095424 0.289296
v -0.215529 0.094977 0.302398
v -0.215203 0.095164 0.289296
v -0.200514 0.099593 0.275687
v -0.204739 0.101998 0.268434
v -0.212924 0.097725 0.277504
v -0.209089 0.101998 0.268434
v -0.138683 0.128194 0.302398
v -0.139262 0.128464 0.289296
v -0.140484 0.129032 0.280544
v -0.122113 0.135260 0.302398
v -0.122113 0.135784 0.289296
v -0.132131 0.131135 0.302398
v -0.132711 0.131399 0.289296
v -0.122175 0.139646 0.275594
v -0.126584 0.141872 0.268734
v -0.117849 0.143572 0.270827
v -0.122175 0.148476 0.265743
v -0.135756 0.133506 0.276183
v -0.135215 0.140008 0.267418
v -0.135215 0.149282 0.262679
v -0.148318 0.123520 0.302398
v -0.148318 0.124064 0.289296
v -0.165051 0.114887 0.302398
v -0.165550 0.115167 0.289296
v -0.158500 0.118402 0.302398
v -0.158999 0.118678 0.289296
v -0.149029 0.127312 0.276183
v -0.153872 0.129115 0.268959
v -0.166691 0.115807 0.280415
v -0.161962 0.120745 0.276106
v -0.161420 0.127138 0.267616
v -0.145137 0.131225 0.271809
v -0.149029 0.135827 0.266259
v -0.148318 0.149282 0.260841
v -0.161420 0.136179 0.262972
v -0.161420 0.149282 0.259816
v -0.122113 0.162384 0.260268
v -0.122113 0.175486 0.259278
v -0.135215 0.162384 0.259721
v -0.135215 0.175486 0.259278
v -0.122113 0.188589 0.259278
v -0.122113 0.201691 0.259278
v -0.135215 0.188589 0.259278
v -0.135215 0.201691 0.259278
v -0.148318 0.162384 0.259375
v -0.148318 0.175486 0.259278
v -0.161420 0.162384 0.259278
v -0.161420 0.175486 0.259278
v -0.148318 0.188589 0.259278
v -0.148318 0.201691 0.259278
v -0.161420 0.188589 0.259278
v -0.161420 0.201691 0.259278
v -0.174522 0.109571 0.302398
v -0.174522 0.110132 0.289296
v -0.183274 0.104659 0.302398
v -0.183774 0.104939 0.289296
v -0.174881 0.113659 0.276106
v -0.179488 0.115636 0.268745
v -0.170753 0.118087 0.271680
v -0.174881 0.122703 0.266126
v -0.187595 0.106844 0.275687
v -0.187625 0.113352 0.267226
v -0.187625 0.123077 0.262571
v -0.174522 0.136179 0.260859
v -0.174522 0.149282 0.259399
v -0.187625 0.136179 0.259950
v -0.187625 0.149282 0.259567
v -0.219654 0.109975 0.302398
v -0.219166 0.109975 0.289296
v -0.219654 0.123077 0.302398
v -0.219166 0.123077 0.289296
v -0.196004 0.104450 0.270982
v -0.200514 0.109280 0.266569
v -0.200727 0.123077 0.263070
v -0.215694 0.109975 0.276193
v -0.209995 0.109975 0.267545
v -0.215694 0.123077 0.276193
v -0.209995 0.123077 0.267260
v -0.219654 0.136179 0.302398
v -0.219166 0.136179 0.289296
v -0.219654 0.149282 0.302398
v -0.219166 0.149282 0.289296
v -0.200727 0.136179 0.262367
v -0.200727 0.149282 0.262367
v -0.215694 0.136179 0.276193
v -0.209995 0.136179 0.267260
v -0.215694 0.149282 0.276193
v -0.209995 0.149282 0.267260
v -0.174522 0.162384 0.259278
v -0.174522 0.175486 0.259278
v -0.187625 0.162384 0.259567
v -0.187625 0.175486 0.259567
v -0.174522 0.188589 0.259278
v -0.174522 0.201691 0.259278
v -0.187625 0.188589 0.259567
v -0.187625 0.201691 0.259567
v -0.219654 0.162384 0.302398
v -0.219166 0.162384 0.289296
v -0.219654 0.175486 0.302398
v -0.219166 0.175486 0.289296
v -0.200727 0.162384 0.262367
v -0.200727 0.175486 0.262367
v -0.215694 0.162384 0.276193
v -0.209995 0.162384 0.267260
v -0.215694 0.175486 0.276193
v -0.209995 0.175486 0.267260
v -0.219654 0.188589 0.302398
v -0.219166 0.188589 0.289296
v -0.219654 0.201691 0.302398
v -0.219166 0.201691 0.289296
v -0.200727 0.188589 0.262367
v -0.200727 0.201691 0.262367
v -0.215694 0.188589 0.276193
v -0.209995 0.188589 0.267260
v -0.215694 0.201691 0.276193
v -0.209995 0.201691 0.267260
v -0.122113 0.214793 0.259278
v -0.122113 0.227896 0.259505
v -0.135215 0.214793 0.259278
v -0.135215 0.227896 0.259880
v -0.127082 0.260212 0.302398
v -0.126169 0.259958 0.289296
v -0.135215 0.257787 0.302398
v -0.135215 0.257277 0.289296
v -0.122113 0.240998 0.261919
v -0.122060 0.257766 0.276170
v -0.122113 0.250967 0.266875
v -0.135215 0.240998 0.263624
v -0.135215 0.253654 0.276193
v -0.135215 0.249046 0.268204
v -0.148318 0.214793 0.259278
v -0.148318 0.227896 0.260454
v -0.161420 0.214793 0.259501
v -0.161420 0.227896 0.261802
v -0.148318 0.253651 0.302398
v -0.148318 0.253136 0.289296
v -0.167097 0.247221 0.302398
v -0.166353 0.246960 0.289296
v -0.160546 0.249524 0.302398
v -0.159802 0.249265 0.289296
v -0.151533 0.246415 0.271245
v -0.147627 0.241628 0.266159
v -0.147627 0.249772 0.275845
v -0.142799 0.247874 0.269179
v -0.161785 0.244912 0.275845
v -0.161420 0.238127 0.266760
v -0.157661 0.248521 0.279980
v -0.120531 0.262012 0.302398
v -0.119618 0.261760 0.289296
v -0.117658 0.261223 0.280521
v -0.174522 0.214793 0.259961
v -0.174522 0.227896 0.264055
v -0.187625 0.214793 0.260976
v -0.189860 0.232695 0.272172
v -0.186345 0.228155 0.266723
v -0.174522 0.244412 0.302398
v -0.174522 0.243889 0.289296
v -0.187625 0.239309 0.302398
v -0.187625 0.238783 0.289296
v -0.174522 0.240177 0.276193
v -0.174522 0.235717 0.268554
v -0.186345 0.235983 0.276401
v -0.181125 0.234466 0.269615
v -0.203481 0.232903 0.302398
v -0.202832 0.232639 0.289296
v -0.219654 0.214793 0.302398
v -0.219166 0.214793 0.289296
v -0.213466 0.226352 0.302398
v -0.213222 0.226088 0.289296
v -0.200727 0.214793 0.263833
v -0.199999 0.230450 0.276401
v -0.200727 0.223936 0.267471
v -0.215694 0.214793 0.276193
v -0.209995 0.214793 0.267777
v -0.211486 0.224214 0.276193
v -0.209089 0.222184 0.268744
v -0.196930 0.235567 0.302398
v -0.196281 0.235303 0.289296
v -0.195146 0.234841 0.280907
vn 0.4798 -0.5849 0.6540
vn 0.3786 -0.5262 0.7614
vn 0.5379 -0.7217 0.4357
vn 0.5893 -0.7113 0.3831
vn 0.5522 -0.8228 0.1349
vn 0.5486 -0.8359 0.0178
vn 0.6044 -0.7964 0.0182
vn 0.6079 -0.7803 0.1472
vn 0.6279 -0.7637 0.1503
vn 0.6381 -0.7698 0.0186
vn 0.5330 -0.7912 0.2998
vn 0.5108 -0.8525 0.1112
vn 0.4666 -0.8754 0.1266
vn 0.4914 -0.8707 0.0195
vn 0.5114 -0.8591 0.0186
vn 0.3378 -0.5910 0.7326
vn 0.4723 -0.7772 0.4158
vn 0.4400 -0.6681 0.6001
vn 0.2826 -0.4430 0.8508
vn 0.3207 -0.5290 0.7857
vn 0.4564 -0.7328 0.5046
vn 0.1621 -0.2630 0.9511
vn 0.2914 -0.6286 0.7211
vn 0.2223 -0.5412 0.8110
vn 0.3200 -0.7668 0.5565
vn 0.3987 -0.8247 0.4011
vn 0.3893 -0.8841 0.2584
vn 0.3331 -0.8876 0.3182
vn 0.3952 -0.9124 0.1063
vn 0.3840 -0.9231 0.0192
vn 0.4356 -0.8999 0.0200
vn 0.4516 -0.8825 0.1312
vn 0.3453 -0.9312 0.1169
vn 0.3693 -0.9291 0.0186
vn 0.1801 -0.3528 0.9182
vn 0.0922 -0.1585 0.9830
vn 0.0423 -0.0789 0.9960
vn 0.1104 -0.2700 0.9565
vn 0.3702 -0.6678 0.6457
vn 0.4483 -0.8119 0.3739
vn 0.4947 -0.8310 0.2543
vn 0.5194 -0.8543 0.0182
vn 0.5295 -0.8398 0.1201
vn 0.5672 -0.4871 0.6641
vn 0.7040 -0.5850 0.4028
vn 0.7131 -0.5408 0.4461
vn 0.5117 -0.3776 0.7717
vn 0.7574 -0.6361 0.1472
vn 0.7518 -0.6592 0.0153
vn 0.7918 -0.6105 0.0189
vn 0.7787 -0.6085 0.1526
vn 0.8148 -0.5617 0.1436
vn 0.8294 -0.5583 0.0189
vn 0.7445 -0.6664 0.0403
vn 0.7450 -0.6669 0.0114
vn 0.7777 -0.5477 0.3085
vn 0.8361 -0.5357 0.1179
vn 0.8455 -0.5337 0.0185
vn 0.8687 -0.4949 0.0187
vn 0.8708 -0.4744 0.1290
vn 0.5826 -0.2879 0.7601
vn 0.8040 -0.4203 0.4207
vn 0.7288 -0.3730 0.5742
vn 0.5027 -0.2438 0.8294
vn 0.6707 -0.2846 0.6849
vn 0.8397 -0.3661 0.4011
vn 0.8593 -0.4287 0.2791
vn 0.8877 -0.4429 0.1258
vn 0.8988 -0.4380 0.0185
vn 0.9104 -0.4133 0.0189
vn 0.9079 -0.3973 0.1337
vn 0.8723 -0.4697 0.1359
vn 0.8876 -0.4602 0.0189
vn 0.5338 -0.3501 0.7697
vn 0.7376 -0.5039 0.4494
vn 0.6918 -0.4532 0.5622
vn 0.4771 -0.3059 0.8239
vn 0.4159 -0.2808 0.8650
vn 0.6398 -0.4532 0.6207
vn 0.2353 -0.1569 0.9592
vn 0.3151 -0.1687 0.9339
vn 0.2261 -0.1068 0.9682
vn 0.0583 -0.0335 0.9977
vn 0.1308 -0.0833 0.9879
vn 0.6382 -0.3443 0.6886
vn 0.8040 -0.4424 0.3972
vn 0.8103 -0.5211 0.2683
vn 0.8150 -0.5650 0.1289
vn 0.8310 -0.5560 0.0186
vn 0.9359 -0.3363 0.1050
vn 0.9465 -0.3223 0.0186
vn 0.9517 -0.3064 0.0187
vn 0.9520 -0.2843 0.1132
vn 0.7076 -0.1740 0.6849
vn 0.8857 -0.2281 0.4043
vn 0.9027 -0.1919 0.3851
vn 0.6829 -0.1398 0.7170
vn 0.9577 -0.2501 0.1425
vn 0.9655 -0.2598 0.0187
vn 0.9766 -0.2143 0.0187
vn 0.9652 -0.2168 0.1459
vn 0.9076 -0.3334 0.2551
vn 0.9111 -0.2732 0.3085
vn 0.6445 -0.1149 0.7559
vn 0.8835 -0.1865 0.4298
vn 0.8267 -0.1008 0.5535
vn 0.6001 -0.0759 0.7963
vn 0.9492 -0.1806 0.2578
vn 0.9545 -0.0898 0.2843
vn 0.9777 -0.1851 0.0991
vn 0.9866 -0.1622 0.0177
vn 0.9952 -0.0964 0.0177
vn 0.9932 -0.0852 0.0790
vn 0.9655 -0.2230 0.1343
vn 0.9798 -0.1992 0.0186
vn 0.5708 -0.0327 0.8205
vn 0.8191 -0.0426 0.5721
vn 0.8163 0.0020 0.5776
vn 0.5640 0.0015 0.8257
vn 0.9563 -0.0423 0.2893
vn 0.9557 0.0021 0.2942
vn 0.9943 -0.0460 0.0960
vn 0.9985 -0.0508 0.0187
vn 0.9998 0.0026 0.0187
vn 0.9948 0.0024 0.1014
vn 0.6317 -0.2336 0.7392
vn 0.8495 -0.3342 0.4081
vn 0.7862 -0.2686 0.5566
vn 0.5500 -0.1857 0.8142
vn 0.2690 -0.0884 0.9591
vn 0.3392 -0.1406 0.9301
vn 0.4964 -0.1465 0.8557
vn 0.3669 -0.0891 0.9260
vn 0.1487 -0.0409 0.9880
vn 0.2063 -0.0581 0.9768
vn 0.1386 -0.0667 0.9881
vn 0.0722 -0.0334 0.9968
vn 0.0061 -0.0043 1.0000
vn 0.0217 -0.0124 0.9997
vn 0.0359 -0.0136 0.9993
vn 0.0185 -0.0057 0.9998
vn 0.0000 0.0000 1.0000
vn 0.0009 -0.0009 1.0000
vn 0.7475 -0.2382 0.6201
vn 0.3217 -0.0615 0.9448
vn 0.2891 -0.0378 0.9566
vn 0.0735 -0.0151 0.9972
vn 0.1024 -0.0263 0.9944
vn 0.2695 -0.0170 0.9628
vn 0.2630 0.0008 0.9648
vn 0.0528 0.0002 0.9986
vn 0.0576 -0.0057 0.9983
vn 0.0087 -0.0041 1.0000
vn 0.0027 -0.0020 1.0000
vn 0.0004 -0.0004 1.0000
vn 0.9170 -0.3764 0.1317
vn 0.9337 -0.3576 0.0191
vn 0.4817 -0.5525 0.6802
vn 0.5981 -0.7005 0.3893
vn 0.6034 -0.6085 0.5153
vn 0.4351 -0.4405 0.7853
vn 0.5411 -0.4905 0.6831
vn 0.6744 -0.6186 0.4031
vn 0.6715 -0.6915 0.2664
vn 0.6924 -0.7123 0.1147
vn 0.7013 -0.7126 0.0183
vn 0.7417 -0.6705 0.0145
vn 0.7376 -0.6627 0.1296
vn 0.6281 -0.7672 0.1300
vn 0.6499 -0.7598 0.0193
vn 0.4743 -0.4312 0.7675
vn 0.2877 -0.2259 0.9307
vn 0.1318 -0.1175 0.9843
vn 0.2525 -0.2394 0.9375
vn 0.4215 -0.4936 0.7607
vn 0.2350 -0.2606 0.9364
vn 0.1173 -0.1422 0.9829
vn 0.2264 -0.3037 0.9255
vn 0.1187 -0.1207 0.9856
vn 0.0361 -0.0335 0.9988
vn 0.0041 -0.0042 1.0000
vn 0.0334 -0.0381 0.9987
vn 0.5943 -0.7062 0.3847
vn 0.6323 -0.7609 0.1456
vn 0.6409 -0.7674 0.0190
vn 0.6805 -0.6046 0.4141
vn 0.7302 -0.6431 0.2309
vn 0.1799 -0.1227 0.9760
vn 0.0847 -0.0605 0.9946
vn 0.0112 -0.0086 0.9999
vn 0.0461 -0.0373 0.9982
vn 0.0250 -0.0195 0.9995
vn 0.0051 -0.0040 1.0000
vn 0.0018 -0.0018 1.0000
vn 0.0059 -0.0050 1.0000
vn -0.0107 0.0070 0.9999
vn -0.0018 0.0018 1.0000
vn 0.1295 -0.1944 0.9723
vn 0.0414 -0.0541 0.9977
vn 0.0115 -0.0144 0.9998
vn 0.0671 -0.0965 0.9931
vn 0.0057 -0.0073 1.0000
vn 0.0008 -0.0008 1.0000
vn 0.0233 -0.0326 0.9992
vn 0.0023 -0.0023 1.0000
vn 0.0057 -0.0082 1.0000
vn -0.0019 0.0019 1.0000
vn -0.0085 0.0119 0.9999
vn -0.0002 0.0002 1.0000
vn -0.0029 0.0029 1.0000
vn -0.0240 0.0242 0.9994
vn -0.0028 0.0028 1.0000
vn -0.0211 0.0189 0.9996
vn -0.0813 0.0594 0.9949
vn -0.2110 0.1675 0.9630
vn -0.0938 0.0858 0.9919
vn -0.0199 0.0218 0.9996
vn -0.0880 0.0943 0.9916
vn -0.1727 0.2122 0.9618
vn -0.0632 0.0840 0.9945
vn -0.4591 0.4594 0.7604
vn -0.6357 0.6351 0.4388
vn -0.5390 0.6061 0.5849
vn -0.3565 0.3985 0.8450
vn -0.6104 0.5358 0.5833
vn -0.4023 0.3530 0.8447
vn -0.2058 0.2034 0.9572
vn 0.0005 -0.0005 1.0000
vn -0.0052 0.0033 1.0000
vn -0.0010 0.0010 1.0000
vn -0.0027 0.0027 1.0000
vn -0.0131 0.0076 0.9999
vn -0.1049 0.0611 0.9926
vn -0.0388 0.0266 0.9989
vn -0.0353 0.0166 0.9992
vn -0.0724 0.0293 0.9969
vn -0.2704 0.0841 0.9591
vn -0.1919 0.0784 0.9783
vn -0.0218 0.0040 0.9998
vn -0.0132 0.0047 0.9999
vn -0.0312 0.0007 0.9995
vn -0.0281 0.0023 0.9996
vn -0.1186 0.0335 0.9924
vn -0.1613 0.0278 0.9865
vn -0.3915 0.0675 0.9177
vn -0.3361 0.0838 0.9381
vn -0.1967 0.0222 0.9802
vn -0.2199 0.0096 0.9755
vn -0.5189 0.0265 0.8544
vn -0.4332 0.0510 0.8999
vn -0.5450 0.2917 0.7860
vn -0.7669 0.4549 0.4527
vn -0.6457 0.4422 0.6225
vn -0.4151 0.2757 0.8670
vn -0.1773 0.1055 0.9785
vn -0.2872 0.1526 0.9456
vn -0.5605 0.1878 0.8066
vn -0.7880 0.2899 0.5431
vn -0.7199 0.3045 0.6237
vn -0.4684 0.2057 0.8592
vn -0.8254 0.3650 0.4307
vn -0.6271 0.2968 0.7202
vn -0.8956 0.3209 0.3081
vn -0.9299 0.3497 0.1143
vn -0.9271 0.3745 0.0186
vn -0.9046 0.4258 0.0184
vn -0.8984 0.4147 0.1445
vn -0.8260 0.5442 0.1465
vn -0.8398 0.5425 0.0195
vn -0.8086 0.5881 0.0190
vn -0.7924 0.5949 0.1350
vn -0.7601 0.6495 0.0184
vn -0.7498 0.6499 0.1241
vn -0.7032 0.5427 0.4594
vn -0.5029 0.3863 0.7732
vn -0.7851 0.5313 0.3185
vn -0.8729 0.4876 0.0190
vn -0.8587 0.4899 0.1502
vn -0.7204 0.6331 0.2831
vn -0.7063 0.1144 0.6986
vn -0.9138 0.1572 0.3746
vn -0.8809 0.2506 0.4014
vn -0.6521 0.1595 0.7411
vn -0.9731 0.1803 0.1437
vn -0.9841 0.1766 0.0178
vn -0.9728 0.2310 0.0165
vn -0.9579 0.2584 0.1253
vn -0.9540 0.2993 0.0174
vn -0.9446 0.3129 0.0995
vn -0.7555 0.0530 0.6530
vn -0.9134 0.0350 0.4055
vn -0.9321 0.0923 0.3503
vn -0.7406 0.0743 0.6678
vn -0.9877 0.0317 0.1532
vn -0.9994 0.0306 0.0187
vn -0.9944 0.1042 0.0188
vn -0.9831 0.1043 0.1503
vn -0.9190 0.3141 0.2383
vn -0.7624 0.0141 0.6470
vn -0.7088 0.7052 0.0181
vn -0.7034 0.7005 0.1206
vn 0.2040 -0.9724 0.1129
vn 0.2048 -0.9686 0.1411
vn 0.2149 -0.9765 0.0186
vn 0.2248 -0.9742 0.0180
vn 0.2713 -0.9559 0.1120
vn 0.2521 -0.9675 0.0174
vn 0.1943 -0.9291 0.3148
vn 0.1859 -0.8988 0.3969
vn 0.2649 -0.9248 0.2730
vn 0.2352 -0.6593 0.7141
vn 0.3091 -0.8491 0.4283
vn 0.2871 -0.7195 0.6323
vn 0.1825 -0.4682 0.8646
vn 0.1963 -0.6184 0.7610
vn 0.2896 -0.8521 0.4359
vn 0.1165 -0.3219 0.9396
vn 0.3562 -0.9227 0.1476
vn 0.3408 -0.9293 0.1426
vn 0.3218 -0.9466 0.0184
vn 0.3688 -0.9293 0.0190
vn 0.0742 -0.1907 0.9788
vn 0.0171 -0.0336 0.9993
vn 0.0069 -0.0121 0.9999
vn 0.0521 -0.1160 0.9919
vn 0.1383 -0.5506 0.8232
vn 0.1180 -0.5151 0.8490
vn 0.1739 -0.7675 0.6171
vn 0.1971 -0.7916 0.5783
vn 0.0634 -0.2628 0.9627
vn 0.0431 -0.2146 0.9758
vn 0.0228 -0.0609 0.9979
vn 0.0025 -0.0027 1.0000
vn 0.0001 -0.0001 1.0000
vn 0.0081 -0.0354 0.9993
vn 0.1173 -0.7075 0.6969
vn 0.0657 -0.6883 0.7225
vn 0.0919 -0.9154 0.3918
vn 0.1542 -0.9168 0.3685
vn 0.1731 -0.9738 0.1475
vn 0.1056 -0.9835 0.1470
vn 0.1048 -0.9943 0.0177
vn 0.1738 -0.9846 0.0186
vn 0.0431 -0.6729 0.7385
vn 0.0390 -0.6621 0.7484
vn 0.0722 -0.8844 0.4612
vn 0.0731 -0.9056 0.4178
vn 0.0759 -0.9964 0.0375
vn 0.0734 -0.9973 0.0077
vn 0.0778 -0.9969 0.0134
vn 0.0870 -0.9847 0.1510
vn 0.0569 -0.9970 0.0518
vn 0.0581 -0.9983 0.0106
vn 0.0813 -0.9713 0.2235
vn 0.0755 -0.3908 0.9174
vn 0.0343 -0.1664 0.9855
vn 0.0175 -0.1311 0.9912
vn 0.0395 -0.3564 0.9335
vn 0.0047 -0.0228 0.9997
vn 0.0030 -0.0152 0.9999
vn 0.0260 -0.3363 0.9414
vn 0.0114 -0.1123 0.9936
vn 0.0102 -0.0980 0.9951
vn 0.0236 -0.3206 0.9469
vn 0.0019 -0.0104 0.9999
vn 0.0016 -0.0068 1.0000
vn 0.1597 -0.7266 0.6683
vn 0.0262 -0.6514 0.7583
vn -0.0075 -0.6475 0.7620
vn -0.0111 -0.8585 0.5128
vn 0.0425 -0.8866 0.4607
vn 0.0253 -0.9657 0.2585
vn -0.0107 -0.9653 0.2609
vn 0.0343 -0.9948 0.0954
vn -0.0087 -0.9982 0.0597
vn -0.0104 -0.9998 0.0191
vn 0.0330 -0.9993 0.0179
vn -0.0335 -0.6553 0.7546
vn -0.0450 -0.6672 0.7435
vn -0.0822 -0.8982 0.4319
vn -0.0602 -0.8939 0.4443
vn -0.0936 -0.9835 0.1547
vn -0.0894 -0.9958 0.0193
vn -0.0647 -0.9978 0.0156
vn -0.0640 -0.9970 0.0438
vn -0.0441 -0.9944 0.0956
vn -0.0425 -0.9990 0.0161
vn -0.0877 -0.9680 0.2351
vn -0.0399 -0.9669 0.2520
vn 0.0616 -0.9665 0.2492
vn 0.0132 -0.3089 0.9510
vn 0.0058 -0.0873 0.9962
vn -0.0018 -0.0846 0.9964
vn -0.0041 -0.3062 0.9520
vn 0.0009 -0.0043 1.0000
vn -0.0003 -0.0036 1.0000
vn -0.0176 -0.3129 0.9496
vn -0.0077 -0.0909 0.9958
vn -0.0122 -0.1042 0.9945
vn -0.0279 -0.3270 0.9446
vn -0.0013 -0.0052 1.0000
vn -0.0020 -0.0084 1.0000
vn -0.0674 -0.6814 0.7288
vn -0.0939 -0.7025 0.7055
vn -0.1230 -0.9177 0.3778
vn -0.0959 -0.9122 0.3985
vn -0.1116 -0.9826 0.1481
vn -0.1392 -0.9792 0.1475
vn -0.1404 -0.9899 0.0187
vn -0.1138 -0.9933 0.0198
vn -0.1197 -0.7284 0.6746
vn -0.1440 -0.7491 0.6466
vn -0.1824 -0.9051 0.3841
vn -0.1502 -0.9231 0.3539
vn -0.1693 -0.9746 0.1469
vn -0.1961 -0.9712 0.1354
vn -0.2087 -0.9778 0.0186
vn -0.1715 -0.9850 0.0187
vn -0.0401 -0.3487 0.9364
vn -0.0174 -0.1238 0.9922
vn -0.0250 -0.1522 0.9880
vn -0.0585 -0.3809 0.9227
vn -0.0028 -0.0132 0.9999
vn -0.0037 -0.0197 0.9998
vn -0.0788 -0.4244 0.9020
vn -0.0351 -0.1928 0.9806
vn -0.0476 -0.2389 0.9699
vn -0.1237 -0.5498 0.8261
vn -0.0050 -0.0285 0.9996
vn -0.0010 -0.0010 1.0000
vn -0.0130 -0.0444 0.9989
vn -0.1960 -0.7851 0.5875
vn 0.0012 -0.0012 1.0000
vn -0.0031 0.0034 1.0000
vn -0.0296 0.0434 0.9986
vn -0.0672 0.1138 0.9912
vn -0.0096 0.0161 0.9998
vn -0.0017 0.0017 1.0000
vn -0.0053 0.0088 0.9999
vn -0.0224 0.0445 0.9988
vn -0.0910 0.2066 0.9742
vn -0.1039 0.2932 0.9504
vn -0.0394 0.0917 0.9950
vn -0.4541 0.6421 0.6177
vn -0.4802 0.7587 0.4403
vn -0.3099 0.5428 0.7806
vn -0.2816 0.4138 0.8657
vn -0.1120 0.1825 0.9768
vn -0.1627 0.2946 0.9417
vn -0.6609 0.7405 0.1219
vn -0.6634 0.7481 0.0180
vn -0.6112 0.7913 0.0180
vn -0.6146 0.7782 0.1290
vn -0.5720 0.8200 0.0181
vn -0.5720 0.8087 0.1373
vn -0.3221 0.6278 0.7085
vn -0.3927 0.8203 0.4159
vn -0.3460 0.7276 0.5924
vn -0.2343 0.4853 0.8424
vn -0.3401 0.8309 0.4403
vn -0.2161 0.5855 0.7813
vn -0.3939 0.8709 0.2940
vn -0.4047 0.9039 0.1386
vn -0.3982 0.9171 0.0206
vn -0.3464 0.9379 0.0197
vn -0.3579 0.9228 0.1429
vn -0.4368 0.8994 0.0190
vn -0.4305 0.8919 0.1385
vn -0.5102 0.8598 0.0179
vn -0.5144 0.8459 0.1410
vn -0.3845 0.4987 0.7768
vn -0.5526 0.6982 0.4552
vn -0.5562 0.7747 0.3007
vn -0.6407 0.7151 0.2795
vn -0.0065 0.0206 0.9998
vn -0.0069 0.0340 0.9994
vn -0.0487 0.1545 0.9868
vn -0.1146 0.3731 0.9207
vn -0.1139 0.5147 0.8498
vn -0.0405 0.2128 0.9763
vn -0.0081 0.0488 0.9988
vn -0.0080 0.0638 0.9979
vn -0.0004 0.0005 1.0000
vn -0.1215 0.7958 0.5932
vn -0.0851 0.8211 0.5645
vn -0.0584 0.5776 0.8142
vn -0.0773 0.5327 0.8428
vn -0.0308 0.2518 0.9673
vn -0.0255 0.2785 0.9601
vn -0.1526 0.7684 0.6215
vn -0.2618 0.8835 0.3886
vn -0.1948 0.8924 0.4069
vn -0.1788 0.7146 0.6762
vn -0.1928 0.6709 0.7160
vn -0.2893 0.9571 0.0187
vn -0.2337 0.9721 0.0188
vn -0.2231 0.9640 0.1445
vn -0.2904 0.9456 0.1469
vn -0.1673 0.9857 0.0188
vn -0.1022 0.9946 0.0187
vn -0.0927 0.9916 0.0907
vn -0.1507 0.9812 0.1203
vn -0.0868 0.9549 0.2838
vn -0.1306 0.9414 0.3110
vn -0.0007 0.0017 1.0000
vn -0.0058 0.0751 0.9972
vn 0.0007 0.0789 0.9969
vn 0.0001 0.0023 1.0000
vn -0.0551 0.8430 0.5351
vn 0.0055 0.8536 0.5209
vn 0.0040 0.6242 0.7812
vn -0.0361 0.6114 0.7905
vn -0.0152 0.2954 0.9553
vn 0.0019 0.3004 0.9538
vn 0.0008 0.0015 1.0000
vn 0.0079 0.0720 0.9974
vn 0.0092 0.0573 0.9983
vn 0.0004 0.0004 1.0000
vn 0.0727 0.8398 0.5380
vn 0.1061 0.8133 0.5720
vn 0.0724 0.5642 0.8225
vn 0.0497 0.6058 0.7940
vn 0.0221 0.2909 0.9565
vn 0.0312 0.2676 0.9630
vn -0.0492 0.9986 0.0187
vn 0.0061 0.9998 0.0187
vn 0.0056 0.9976 0.0685
vn -0.0453 0.9963 0.0732
vn 0.0719 0.9972 0.0187
vn 0.1314 0.9912 0.0187
vn 0.1195 0.9877 0.1006
vn 0.0659 0.9948 0.0780
vn 0.0054 0.9672 0.2538
vn -0.0503 0.9632 0.2641
vn 0.1096 0.9498 0.2930
vn 0.0686 0.9608 0.2686
vn 0.0070 0.0418 0.9991
vn 0.0058 0.0290 0.9996
vn 0.1317 0.7823 0.6088
vn 0.1546 0.7513 0.6416
vn 0.1103 0.4901 0.8647
vn 0.0790 0.5124 0.8551
vn 0.0290 0.2381 0.9708
vn 0.0394 0.1977 0.9795
vn 0.0059 0.0173 0.9998
vn 0.0043 0.0071 1.0000
vn 0.0462 0.1403 0.9890
vn 0.1065 0.3542 0.9291
vn 0.0899 0.2846 0.9544
vn 0.0338 0.0821 0.9961
vn 0.1847 0.9826 0.0187
vn 0.2338 0.9721 0.0179
vn 0.2292 0.9622 0.1468
vn 0.1691 0.9770 0.1298
vn 0.2574 0.8741 0.4119
vn 0.2899 0.8372 0.4638
vn 0.1909 0.5855 0.7879
vn 0.1751 0.6625 0.7283
vn 0.2919 0.9453 0.1455
vn 0.2729 0.9619 0.0158
vn 0.3040 0.9525 0.0145
vn 0.3043 0.9516 0.0432
vn 0.3333 0.9427 0.0164
vn 0.3116 0.9415 0.1283
vn 0.3171 0.9181 0.2379
vn 0.1977 0.8863 0.4189
vn 0.1709 0.7003 0.6931
vn 0.1474 0.9350 0.3226
vn 0.2987 0.9039 0.3062
vn -0.2181 -0.9706 0.1015
vn -0.2824 -0.9542 0.0990
vn -0.2658 -0.9639 0.0190
vn -0.2391 -0.9708 0.0185
vn -0.2164 -0.9312 0.2934
vn -0.2840 -0.9275 0.2432
vn -0.1553 -0.5899 0.7924
vn -0.1887 -0.6568 0.7301
vn -0.2764 -0.8746 0.3984
vn -0.2227 -0.8204 0.5267
vn -0.0750 -0.2860 0.9553
vn -0.1135 -0.3463 0.9312
vn -0.0298 -0.0773 0.9966
vn -0.0038 -0.0058 1.0000
vn -0.0068 -0.0164 0.9998
vn -0.0503 -0.1349 0.9896
vn -0.1762 -0.4935 0.8517
vn -0.2812 -0.7410 0.6098
vn -0.2789 -0.8683 0.4101
vn -0.2140 -0.6906 0.6909
vn -0.2169 -0.5625 0.7978
vn -0.3099 -0.7878 0.5322
vn -0.3135 -0.8987 0.3066
vn -0.3096 -0.9404 0.1410
vn -0.3203 -0.9408 0.1108
vn -0.3444 -0.9387 0.0186
vn -0.3191 -0.9475 0.0192
vn -0.0707 -0.2047 0.9763
vn -0.0177 -0.0379 0.9991
vn -0.0416 -0.0827 0.9957
vn -0.1072 -0.2787 0.9544
vn -0.3150 -0.9397 0.1335
vn -0.2934 -0.9558 0.0195
vn -0.2570 -0.6470 0.7179
vn -0.2950 -0.6867 0.6644
vn -0.3670 -0.8449 0.3892
vn -0.3619 -0.8463 0.3908
vn -0.4126 -0.9021 0.1265
vn -0.3944 -0.9187 0.0188
vn -0.3704 -0.9287 0.0185
vn -0.3801 -0.9195 0.1000
vn -0.3942 -0.9105 0.1252
vn -0.4150 -0.9096 0.0186
vn -0.1582 -0.3597 0.9195
vn -0.0766 -0.1573 0.9846
vn -0.1269 -0.2426 0.9618
vn -0.2544 -0.5272 0.8108
vn -0.5051 -0.3049 0.8074
vn -0.6986 -0.2866 0.6556
vn -0.5084 -0.7257 0.4636
vn -0.4313 -0.5831 0.6884
vn -0.3056 -0.5860 0.7505
vn -0.4168 -0.8117 0.4091
vn -0.2513 -0.2820 0.9259
vn -0.4639 -0.8766 0.1278
vn -0.4353 -0.8919 0.1228
vn -0.4591 -0.8882 0.0175
vn -0.4482 -0.8937 0.0186
vn -0.4398 -0.8908 0.1143
vn -0.4366 -0.8995 0.0184
vn -0.3717 -0.7438 0.5555
vn -0.3756 -0.8933 0.2471
vn -0.4248 -0.8658 0.2644
vn -0.9884 -0.1100 0.1051
vn -0.9915 -0.1285 0.0178
vn -0.7833 -0.6214 0.0176
vn -0.7781 -0.6184 0.1103
vn -0.8906 -0.1869 0.4146
vn -0.7247 -0.5881 0.3590
vn 0.0014 0.0014 1.0000
vn 0.0183 0.0417 0.9990
vn 0.0754 0.2119 0.9744
vn 0.0594 0.1323 0.9894
vn 0.0083 0.0179 0.9998
vn -0.0015 -0.0015 1.0000
vn -0.0056 -0.0086 0.9999
vn 0.0040 0.0056 1.0000
vn 0.0345 0.0643 0.9973
vn 0.0148 0.0248 0.9996
vn 0.0008 0.0008 1.0000
vn 0.1987 0.5060 0.8394
vn 0.2981 0.7478 0.5932
vn 0.3223 0.8519 0.4127
vn 0.2647 0.6690 0.6945
vn 0.3831 0.8247 0.4160
vn 0.2554 0.6043 0.7547
vn 0.1405 0.3328 0.9325
vn 0.3641 0.9312 0.0182
vn 0.3953 0.9184 0.0187
vn 0.4133 0.9008 0.1330
vn 0.3550 0.9248 0.1372
vn 0.1113 0.2370 0.9651
vn 0.2566 0.5161 0.8172
vn 0.1702 0.3300 0.9285
vn 0.0767 0.1405 0.9871
vn 0.3995 0.8269 0.3959
vn 0.4464 0.7918 0.4168
vn 0.3028 0.5851 0.7523
vn 0.3292 0.6541 0.6810
vn 0.4864 0.8635 0.1330
vn 0.4751 0.8797 0.0187
vn 0.5012 0.8651 0.0189
vn 0.5036 0.8549 0.1245
vn 0.4515 0.8921 0.0189
vn 0.4342 0.8915 0.1290
vn 0.3709 0.7419 0.5586
vn 0.4257 0.9047 0.0191
vn 0.4306 0.8945 0.1199
vn 0.4885 0.8275 0.2769
vn 0.4183 0.8675 0.2691
vn -0.0166 -0.0283 0.9995
vn -0.0012 -0.0012 1.0000
vn -0.0446 -0.0036 0.9990
vn -0.0659 -0.0624 0.9959
vn 0.0048 0.0068 1.0000
vn -0.0424 0.0010 0.9991
vn -0.0434 0.0000 0.9991
vn -0.5480 -0.0011 0.8365
vn -0.8106 0.0000 0.5856
vn -0.7892 -0.0611 0.6112
vn -0.5370 -0.0829 0.8395
vn -0.2495 -0.0852 0.9646
vn -0.2473 -0.0035 0.9689
vn -0.5489 0.0000 0.8359
vn -0.2485 0.0000 0.9686
vn 0.0394 0.0636 0.9972
vn 0.1268 0.2218 0.9668
vn 0.0384 0.1150 0.9926
vn -0.0278 0.0204 0.9994
vn 0.2868 0.4824 0.8277
vn 0.4214 0.7063 0.5688
vn 0.4539 0.7919 0.4086
vn 0.3624 0.6148 0.7005
vn 0.4758 0.7596 0.4434
vn 0.3052 0.5359 0.7872
vn 0.1455 0.2874 0.9467
vn 0.5196 0.8542 0.0188
vn 0.5252 0.8508 0.0187
vn 0.5269 0.8375 0.1450
vn 0.5009 0.8547 0.1361
vn -0.5443 0.0054 0.8389
vn -0.2452 0.0035 0.9695
vn -0.2169 0.0376 0.9755
vn -0.4198 0.1604 0.8933
vn -0.7696 0.0846 0.6329
vn -0.8060 0.0055 0.5919
vn -0.4966 0.0599 0.8659
vn -0.1227 0.1674 0.9782
vn 0.1122 0.3999 0.9097
vn 0.4203 0.6664 0.6159
vn 0.4179 0.7831 0.4606
vn -0.3130 0.5191 0.7954
vn -0.2270 0.5401 0.8104
vn 0.1781 0.5767 0.7973
vn 0.4641 0.8040 0.3717
vn 0.0325 0.7781 0.6273
vn 0.5371 0.8345 0.1234
vn 0.5207 0.8454 0.1190
vn 0.2192 0.9755 0.0187
vn 0.2173 0.9670 0.1331
vn 0.5282 0.8378 0.1383
vn 0.5126 0.8037 0.3022
vn -0.9936 0.0000 0.1129
vn -0.9998 0.0000 0.0186
vn -0.9998 -0.0003 0.0189
vn -0.9934 -0.0022 0.1147
vn -0.9529 0.0000 0.3033
vn -0.9427 -0.0250 0.3327
vn -0.9323 0.0340 0.3600
vn -0.6607 0.7371 0.1423
vn -0.6825 0.7306 0.0196
vn -0.9960 0.0881 0.0167
vn -0.9921 0.0743 0.1011
vn -0.6162 0.6355 0.4653
vn -0.8605 0.1600 0.4837
vn 0.5486 -0.8359 -0.0178
vn 0.5521 -0.8228 -0.1349
vn 0.6079 -0.7803 -0.1472
vn 0.6044 -0.7965 -0.0182
vn 0.6381 -0.7698 -0.0186
vn 0.6278 -0.7637 -0.1504
vn 0.5893 -0.7113 -0.3832
vn 0.5379 -0.7217 -0.4358
vn 0.3786 -0.5261 -0.7615
vn 0.4798 -0.5848 -0.6541
vn 0.5330 -0.7912 -0.2999
vn 0.5114 -0.8591 -0.0187
vn 0.4914 -0.8707 -0.0195
vn 0.4666 -0.8753 -0.1266
vn 0.5107 -0.8525 -0.1113
vn 0.4723 -0.7772 -0.4158
vn 0.3377 -0.5909 -0.7326
vn 0.2825 -0.4430 -0.8508
vn 0.4399 -0.6681 -0.6001
vn 0.4565 -0.7328 -0.5046
vn 0.3207 -0.5290 -0.7857
vn 0.1621 -0.2630 -0.9511
vn 0.3840 -0.9231 -0.0192
vn 0.3952 -0.9124 -0.1064
vn 0.4516 -0.8825 -0.1312
vn 0.4356 -0.8999 -0.0200
vn 0.3693 -0.9291 -0.0187
vn 0.3453 -0.9312 -0.1170
vn 0.3986 -0.8247 -0.4011
vn 0.3200 -0.7668 -0.5565
vn 0.2223 -0.5411 -0.8110
vn 0.2913 -0.6285 -0.7212
vn 0.3331 -0.8876 -0.3182
vn 0.3893 -0.8841 -0.2584
vn 0.1103 -0.2700 -0.9565
vn 0.0423 -0.0789 -0.9960
vn 0.0922 -0.1585 -0.9831
vn 0.1800 -0.3528 -0.9182
vn 0.4484 -0.8119 -0.3740
vn 0.3702 -0.6678 -0.6458
vn 0.5294 -0.8398 -0.1202
vn 0.5194 -0.8543 -0.0183
vn 0.4947 -0.8310 -0.2543
vn 0.7518 -0.6592 -0.0153
vn 0.7574 -0.6361 -0.1472
vn 0.7787 -0.6085 -0.1526
vn 0.7918 -0.6105 -0.0189
vn 0.8294 -0.5583 -0.0190
vn 0.8148 -0.5617 -0.1436
vn 0.7040 -0.5850 -0.4028
vn 0.5672 -0.4871 -0.6642
vn 0.5116 -0.3776 -0.7718
vn 0.7131 -0.5408 -0.4462
vn 0.7450 -0.6669 -0.0114
vn 0.7445 -0.6664 -0.0403
vn 0.7777 -0.5477 -0.3086
vn 0.8455 -0.5337 -0.0185
vn 0.8361 -0.5357 -0.1180
vn 0.8708 -0.4744 -0.1290
vn 0.8687 -0.4949 -0.0188
vn 0.8988 -0.4380 -0.0185
vn 0.8877 -0.4429 -0.1259
vn 0.9079 -0.3973 -0.1338
vn 0.9104 -0.4134 -0.0190
vn 0.8876 -0.4602 -0.0189
vn 0.8723 -0.4697 -0.1360
vn 0.8039 -0.4203 -0.4207
vn 0.5826 -0.2878 -0.7601
vn 0.5026 -0.2438 -0.8294
vn 0.7288 -0.3730 -0.5742
vn 0.8397 -0.3661 -0.4012
vn 0.6707 -0.2846 -0.6850
vn 0.8592 -0.4287 -0.2792
vn 0.7376 -0.5039 -0.4495
vn 0.5338 -0.3501 -0.7698
vn 0.4771 -0.3058 -0.8239
vn 0.6918 -0.4532 -0.5622
vn 0.6397 -0.4532 -0.6208
vn 0.4158 -0.2808 -0.8650
vn 0.2353 -0.1569 -0.9592
vn 0.1308 -0.0833 -0.9879
vn 0.0583 -0.0335 -0.9977
vn 0.2260 -0.1067 -0.9683
vn 0.3151 -0.1687 -0.9340
vn 0.8310 -0.5560 -0.0187
vn 0.8150 -0.5650 -0.1289
vn 0.8040 -0.4424 -0.3973
vn 0.6381 -0.3443 -0.6886
vn 0.8103 -0.5211 -0.2683
vn 0.9465 -0.3223 -0.0187
vn 0.9359 -0.3363 -0.1050
vn 0.9520 -0.2842 -0.1133
vn 0.9517 -0.3064 -0.0187
vn 0.9655 -0.2598 -0.0187
vn 0.9577 -0.2501 -0.1425
vn 0.9652 -0.2168 -0.1459
vn 0.9766 -0.2143 -0.0187
vn 0.8857 -0.2281 -0.4044
vn 0.7075 -0.1740 -0.6850
vn 0.6829 -0.1398 -0.7170
vn 0.9027 -0.1919 -0.3852
vn 0.9076 -0.3334 -0.2552
vn 0.9111 -0.2732 -0.3086
vn 0.9866 -0.1621 -0.0177
vn 0.9777 -0.1851 -0.0992
vn 0.9932 -0.0852 -0.0790
vn 0.9952 -0.0964 -0.0177
vn 0.9798 -0.1992 -0.0186
vn 0.9655 -0.2230 -0.1343
vn 0.8834 -0.1865 -0.4299
vn 0.6444 -0.1149 -0.7560
vn 0.6001 -0.0759 -0.7963
vn 0.8267 -0.1008 -0.5535
vn 0.9545 -0.0898 -0.2843
vn 0.9492 -0.1806 -0.2578
vn 0.9985 -0.0508 -0.0187
vn 0.9943 -0.0461 -0.0960
vn 0.9948 0.0024 -0.1014
vn 0.9998 0.0026 -0.0187
vn 0.8190 -0.0426 -0.5722
vn 0.5707 -0.0327 -0.8205
vn 0.5640 0.0015 -0.8258
vn 0.8163 0.0020 -0.5777
vn 0.9557 0.0021 -0.2943
vn 0.9563 -0.0423 -0.2893
vn 0.8495 -0.3342 -0.4082
vn 0.6317 -0.2336 -0.7392
vn 0.5500 -0.1857 -0.8143
vn 0.7862 -0.2686 -0.5566
vn 0.3391 -0.1406 -0.9302
vn 0.2690 -0.0884 -0.9591
vn 0.2062 -0.0581 -0.9768
vn 0.1487 -0.0409 -0.9880
vn 0.3668 -0.0890 -0.9260
vn 0.4963 -0.1465 -0.8557
vn 0.0217 -0.0124 -0.9997
vn 0.0061 -0.0043 -1.0000
vn 0.0722 -0.0334 -0.9968
vn 0.1386 -0.0666 -0.9881
vn 0.0009 -0.0009 -1.0000
vn -0.0000 -0.0000 -1.0000
vn 0.0185 -0.0057 -0.9998
vn 0.0359 -0.0136 -0.9993
vn 0.7474 -0.2382 -0.6202
vn 0.1024 -0.0263 -0.9944
vn 0.0735 -0.0151 -0.9972
vn 0.2890 -0.0378 -0.9566
vn 0.3217 -0.0615 -0.9449
vn 0.0576 -0.0057 -0.9983
vn 0.0528 0.0002 -0.9986
vn 0.2629 0.0008 -0.9648
vn 0.2695 -0.0170 -0.9629
vn 0.0027 -0.0020 -1.0000
vn 0.0087 -0.0041 -1.0000
vn 0.0004 -0.0004 -1.0000
vn 0.9337 -0.3576 -0.0191
vn 0.9170 -0.3764 -0.1318
vn 0.7013 -0.7126 -0.0183
vn 0.6924 -0.7123 -0.1147
vn 0.7376 -0.6626 -0.1297
vn 0.7417 -0.6705 -0.0146
vn 0.6499 -0.7597 -0.0193
vn 0.6281 -0.7672 -0.1301
vn 0.5981 -0.7005 -0.3893
vn 0.4817 -0.5525 -0.6803
vn 0.4350 -0.4405 -0.7853
vn 0.6034 -0.6085 -0.5154
vn 0.6744 -0.6185 -0.4032
vn 0.5410 -0.4905 -0.6832
vn 0.6715 -0.6914 -0.2665
vn 0.2524 -0.2394 -0.9375
vn 0.1318 -0.1175 -0.9843
vn 0.2876 -0.2259 -0.9307
vn 0.4743 -0.4311 -0.7676
vn 0.2264 -0.3037 -0.9255
vn 0.1172 -0.1422 -0.9829
vn 0.2349 -0.2605 -0.9364
vn 0.4215 -0.4935 -0.7608
vn 0.0334 -0.0381 -0.9987
vn 0.0041 -0.0042 -1.0000
vn 0.0361 -0.0335 -0.9988
vn 0.1187 -0.1207 -0.9856
vn 0.6409 -0.7674 -0.0190
vn 0.6323 -0.7609 -0.1456
vn 0.5943 -0.7062 -0.3848
vn 0.6804 -0.6046 -0.4142
vn 0.7302 -0.6431 -0.2309
vn 0.0461 -0.0373 -0.9982
vn 0.0112 -0.0086 -0.9999
vn 0.0846 -0.0605 -0.9946
vn 0.1799 -0.1227 -0.9760
vn 0.0018 -0.0018 -1.0000
vn 0.0051 -0.0040 -1.0000
vn 0.0250 -0.0195 -0.9995
vn 0.0059 -0.0050 -1.0000
vn -0.0018 0.0018 -1.0000
vn -0.0107 0.0070 -0.9999
vn 0.0671 -0.0965 -0.9931
vn 0.0115 -0.0144 -0.9998
vn 0.0414 -0.0541 -0.9977
vn 0.1295 -0.1944 -0.9723
vn 0.0008 -0.0008 -1.0000
vn 0.0057 -0.0073 -1.0000
vn 0.0057 -0.0082 -1.0000
vn 0.0023 -0.0023 -1.0000
vn 0.0233 -0.0326 -0.9992
vn -0.0002 0.0002 -1.0000
vn -0.0085 0.0119 -0.9999
vn -0.0019 0.0019 -1.0000
vn -0.0029 0.0029 -1.0000
vn -0.0240 0.0242 -0.9994
vn -0.0938 0.0858 -0.9919
vn -0.2110 0.1675 -0.9630
vn -0.0813 0.0594 -0.9949
vn -0.0211 0.0189 -0.9996
vn -0.0632 0.0840 -0.9945
vn -0.1727 0.2121 -0.9619
vn -0.0880 0.0943 -0.9917
vn -0.0199 0.0218 -0.9996
vn -0.6356 0.6351 -0.4389
vn -0.4590 0.4594 -0.7605
vn -0.3565 0.3985 -0.8451
vn -0.5390 0.6061 -0.5849
vn -0.4023 0.3530 -0.8447
vn -0.6104 0.5358 -0.5834
vn -0.2058 0.2033 -0.9572
vn 0.0005 -0.0005 -1.0000
vn -0.0010 0.0010 -1.0000
vn -0.0052 0.0033 -1.0000
vn -0.0388 0.0266 -0.9989
vn -0.1049 0.0611 -0.9926
vn -0.0131 0.0076 -0.9999
vn -0.0027 0.0027 -1.0000
vn -0.1919 0.0783 -0.9783
vn -0.2703 0.0841 -0.9591
vn -0.0724 0.0293 -0.9969
vn -0.0353 0.0166 -0.9992
vn -0.0132 0.0047 -0.9999
vn -0.0218 0.0040 -0.9998
vn -0.0281 0.0023 -0.9996
vn -0.0312 0.0007 -0.9995
vn -0.3360 0.0838 -0.9381
vn -0.3915 0.0675 -0.9177
vn -0.1613 0.0278 -0.9865
vn -0.1186 0.0335 -0.9924
vn -0.4332 0.0510 -0.8999
vn -0.5189 0.0265 -0.8544
vn -0.2199 0.0095 -0.9755
vn -0.1967 0.0222 -0.9802
vn -0.7668 0.4549 -0.4528
vn -0.5450 0.2917 -0.7861
vn -0.4151 0.2757 -0.8670
vn -0.6456 0.4422 -0.6226
vn -0.2872 0.1525 -0.9456
vn -0.1772 0.1055 -0.9785
vn -0.9271 0.3745 -0.0186
vn -0.9299 0.3497 -0.1143
vn -0.8984 0.4147 -0.1446
vn -0.9046 0.4258 -0.0184
vn -0.7880 0.2898 -0.5432
vn -0.5605 0.1877 -0.8066
vn -0.4684 0.2056 -0.8593
vn -0.7198 0.3045 -0.6238
vn -0.6270 0.2968 -0.7202
vn -0.8254 0.3650 -0.4308
vn -0.8956 0.3208 -0.3082
vn -0.8398 0.5425 -0.0195
vn -0.8260 0.5442 -0.1465
vn -0.7924 0.5949 -0.1350
vn -0.8086 0.5881 -0.0191
vn -0.7498 0.6499 -0.1241
vn -0.7601 0.6495 -0.0184
vn -0.8587 0.4899 -0.1503
vn -0.8729 0.4876 -0.0190
vn -0.5028 0.3863 -0.7733
vn -0.7031 0.5427 -0.4594
vn -0.7851 0.5312 -0.3185
vn -0.7204 0.6331 -0.2832
vn -0.9841 0.1766 -0.0178
vn -0.9730 0.1803 -0.1438
vn -0.9579 0.2584 -0.1254
vn -0.9728 0.2310 -0.0165
vn -0.9445 0.3129 -0.0995
vn -0.9540 0.2993 -0.0174
vn -0.9137 0.1572 -0.3747
vn -0.7062 0.1144 -0.6987
vn -0.6521 0.1595 -0.7412
vn -0.8809 0.2506 -0.4015
vn -0.9994 0.0306 -0.0187
vn -0.9877 0.0317 -0.1532
vn -0.9831 0.1043 -0.1503
vn -0.9944 0.1042 -0.0188
vn -0.9134 0.0350 -0.4056
vn -0.7555 0.0530 -0.6530
vn -0.7406 0.0743 -0.6678
vn -0.9320 0.0923 -0.3504
vn -0.9190 0.3141 -0.2384
vn -0.7623 0.0141 -0.6470
vn -0.7033 0.7006 -0.1206
vn -0.7088 0.7052 -0.0181
vn 0.2248 -0.9742 -0.0180
vn 0.2149 -0.9765 -0.0186
vn 0.2048 -0.9686 -0.1411
vn 0.2040 -0.9724 -0.1129
vn 0.2521 -0.9675 -0.0174
vn 0.2713 -0.9559 -0.1121
vn 0.1859 -0.8988 -0.3970
vn 0.1943 -0.9290 -0.3149
vn 0.2650 -0.9248 -0.2731
vn 0.3688 -0.9293 -0.0190
vn 0.3218 -0.9466 -0.0184
vn 0.3408 -0.9293 -0.1427
vn 0.3562 -0.9227 -0.1476
vn 0.3091 -0.8491 -0.4283
vn 0.2351 -0.6593 -0.7142
vn 0.1825 -0.4682 -0.8646
vn 0.2871 -0.7195 -0.6324
vn 0.2896 -0.8521 -0.4360
vn 0.1962 -0.6184 -0.7610
vn 0.1165 -0.3218 -0.9396
vn 0.0521 -0.1160 -0.9919
vn 0.0069 -0.0121 -0.9999
vn 0.0171 -0.0336 -0.9993
vn 0.0742 -0.1907 -0.9788
vn 0.1971 -0.7916 -0.5784
vn 0.1739 -0.7674 -0.6171
vn 0.1180 -0.5150 -0.8490
vn 0.1383 -0.5506 -0.8232
vn 0.0430 -0.2145 -0.9758
vn 0.0634 -0.2628 -0.9628
vn 0.0081 -0.0354 -0.9993
vn 0.0001 -0.0001 -1.0000
vn 0.0025 -0.0027 -1.0000
vn 0.0228 -0.0609 -0.9979
vn 0.1738 -0.9846 -0.0186
vn 0.1048 -0.9943 -0.0177
vn 0.1056 -0.9835 -0.1470
vn 0.1731 -0.9738 -0.1475
vn 0.1542 -0.9167 -0.3686
vn 0.0919 -0.9154 -0.3919
vn 0.0657 -0.6882 -0.7225
vn 0.1173 -0.7074 -0.6970
vn 0.0734 -0.9973 -0.0077
vn 0.0759 -0.9964 -0.0375
vn 0.0870 -0.9847 -0.1510
vn 0.0778 -0.9969 -0.0134
vn 0.0581 -0.9983 -0.0106
vn 0.0569 -0.9970 -0.0518
vn 0.0813 -0.9713 -0.2235
vn 0.0731 -0.9056 -0.4179
vn 0.0722 -0.8843 -0.4612
vn 0.0390 -0.6620 -0.7484
vn 0.0431 -0.6729 -0.7385
vn 0.0395 -0.3564 -0.9335
vn 0.0175 -0.1312 -0.9912
vn 0.0343 -0.1664 -0.9855
vn 0.0755 -0.3907 -0.9174
vn 0.0030 -0.0152 -0.9999
vn 0.0047 -0.0228 -0.9997
vn 0.0236 -0.3206 -0.9469
vn 0.0102 -0.0980 -0.9951
vn 0.0114 -0.1123 -0.9936
vn 0.0260 -0.3362 -0.9414
vn 0.0016 -0.0068 -1.0000
vn 0.0019 -0.0104 -0.9999
vn 0.1597 -0.7265 -0.6684
vn 0.0330 -0.9993 -0.0179
vn -0.0104 -0.9998 -0.0192
vn -0.0087 -0.9982 -0.0597
vn 0.0343 -0.9948 -0.0954
vn 0.0425 -0.8865 -0.4607
vn -0.0111 -0.8584 -0.5128
vn -0.0075 -0.6475 -0.7621
vn 0.0262 -0.6513 -0.7583
vn -0.0107 -0.9653 -0.2610
vn 0.0253 -0.9657 -0.2585
vn -0.0894 -0.9958 -0.0193
vn -0.0936 -0.9835 -0.1548
vn -0.0640 -0.9970 -0.0438
vn -0.0647 -0.9978 -0.0156
vn -0.0425 -0.9990 -0.0161
vn -0.0441 -0.9944 -0.0956
vn -0.0877 -0.9680 -0.2351
vn -0.0602 -0.8938 -0.4443
vn -0.0822 -0.8981 -0.4320
vn -0.0451 -0.6672 -0.7435
vn -0.0335 -0.6553 -0.7546
vn -0.0399 -0.9669 -0.2520
vn 0.0616 -0.9665 -0.2492
vn -0.0041 -0.3061 -0.9520
vn -0.0018 -0.0846 -0.9964
vn 0.0058 -0.0873 -0.9962
vn 0.0132 -0.3089 -0.9510
vn -0.0003 -0.0036 -1.0000
vn 0.0009 -0.0043 -1.0000
vn -0.0279 -0.3270 -0.9446
vn -0.0122 -0.1042 -0.9945
vn -0.0077 -0.0909 -0.9958
vn -0.0176 -0.3129 -0.9496
vn -0.0020 -0.0084 -1.0000
vn -0.0013 -0.0052 -1.0000
vn -0.1138 -0.9933 -0.0198
vn -0.1404 -0.9899 -0.0187
vn -0.1392 -0.9792 -0.1476
vn -0.1116 -0.9826 -0.1482
vn -0.0959 -0.9121 -0.3985
vn -0.1230 -0.9177 -0.3779
vn -0.0939 -0.7024 -0.7055
vn -0.0674 -0.6813 -0.7289
vn -0.1715 -0.9850 -0.0187
vn -0.2087 -0.9778 -0.0187
vn -0.1960 -0.9712 -0.1354
vn -0.1693 -0.9745 -0.1470
vn -0.1502 -0.9231 -0.3539
vn -0.1824 -0.9051 -0.3842
vn -0.1439 -0.7491 -0.6466
vn -0.1197 -0.7283 -0.6747
vn -0.0585 -0.3809 -0.9228
vn -0.0250 -0.1522 -0.9880
vn -0.0174 -0.1238 -0.9922
vn -0.0401 -0.3487 -0.9364
vn -0.0037 -0.0197 -0.9998
vn -0.0028 -0.0132 -0.9999
vn -0.1237 -0.5498 -0.8261
vn -0.0476 -0.2389 -0.9699
vn -0.0351 -0.1928 -0.9806
vn -0.0788 -0.4244 -0.9021
vn -0.0130 -0.0444 -0.9989
vn -0.0010 -0.0010 -1.0000
vn -0.0050 -0.0285 -0.9996
vn -0.1960 -0.7851 -0.5876
vn 0.0012 -0.0012 -1.0000
vn -0.0096 0.0161 -0.9998
vn -0.0672 0.1138 -0.9912
vn -0.0296 0.0434 -0.9986
vn -0.0031 0.0034 -1.0000
vn -0.0053 0.0088 -0.9999
vn -0.0017 0.0017 -1.0000
vn -0.0394 0.0917 -0.9950
vn -0.1039 0.2931 -0.9504
vn -0.0910 0.2066 -0.9742
vn -0.0224 0.0445 -0.9988
vn -0.2816 0.4138 -0.8657
vn -0.3099 0.5428 -0.7806
vn -0.4801 0.7587 -0.4403
vn -0.4541 0.6421 -0.6177
vn -0.1627 0.2946 -0.9417
vn -0.1119 0.1824 -0.9768
vn -0.6634 0.7481 -0.0180
vn -0.6609 0.7405 -0.1219
vn -0.6146 0.7782 -0.1290
vn -0.6112 0.7913 -0.0180
vn -0.5720 0.8087 -0.1373
vn -0.5720 0.8200 -0.0181
vn -0.3982 0.9171 -0.0206
vn -0.4047 0.9039 -0.1387
vn -0.3579 0.9228 -0.1429
vn -0.3464 0.9379 -0.0197
vn -0.4305 0.8919 -0.1385
vn -0.4368 0.8994 -0.0190
vn -0.3927 0.8203 -0.4159
vn -0.3221 0.6278 -0.7086
vn -0.2343 0.4853 -0.8424
vn -0.3459 0.7276 -0.5924
vn -0.2161 0.5855 -0.7813
vn -0.3401 0.8309 -0.4403
vn -0.3939 0.8709 -0.2941
vn -0.5144 0.8459 -0.1411
vn -0.5102 0.8598 -0.0180
vn -0.5527 0.6981 -0.4552
vn -0.3845 0.4987 -0.7768
vn -0.5562 0.7747 -0.3008
vn -0.6407 0.7151 -0.2796
vn -0.0069 0.0340 -0.9994
vn -0.0065 0.0206 -0.9998
vn -0.0405 0.2128 -0.9763
vn -0.1139 0.5146 -0.8498
vn -0.1146 0.3730 -0.9207
vn -0.0487 0.1545 -0.9868
vn -0.0004 0.0005 -1.0000
vn -0.0080 0.0638 -0.9979
vn -0.0081 0.0488 -0.9988
vn -0.0773 0.5326 -0.8428
vn -0.0584 0.5776 -0.8143
vn -0.0851 0.8210 -0.5645
vn -0.1215 0.7958 -0.5933
vn -0.0255 0.2784 -0.9601
vn -0.0307 0.2518 -0.9673
vn -0.1526 0.7683 -0.6216
vn -0.2904 0.9456 -0.1469
vn -0.2230 0.9640 -0.1445
vn -0.2337 0.9721 -0.0188
vn -0.2893 0.9571 -0.0187
vn -0.1928 0.6709 -0.7161
vn -0.1788 0.7146 -0.6763
vn -0.1948 0.8924 -0.4070
vn -0.2618 0.8834 -0.3886
vn -0.1506 0.9812 -0.1203
vn -0.0927 0.9916 -0.0907
vn -0.1022 0.9946 -0.0187
vn -0.1673 0.9857 -0.0188
vn -0.1306 0.9414 -0.3111
vn -0.0868 0.9549 -0.2839
vn 0.0001 0.0023 -1.0000
vn 0.0007 0.0789 -0.9969
vn -0.0058 0.0751 -0.9972
vn -0.0007 0.0017 -1.0000
vn -0.0361 0.6114 -0.7905
vn 0.0039 0.6242 -0.7812
vn 0.0055 0.8536 -0.5209
vn -0.0551 0.8430 -0.5351
vn 0.0019 0.3004 -0.9538
vn -0.0152 0.2954 -0.9553
vn 0.0004 0.0004 -1.0000
vn 0.0092 0.0573 -0.9983
vn 0.0079 0.0720 -0.9974
vn 0.0008 0.0015 -1.0000
vn 0.0497 0.6058 -0.7940
vn 0.0724 0.5641 -0.8225
vn 0.1061 0.8133 -0.5721
vn 0.0728 0.8398 -0.5380
vn 0.0312 0.2676 -0.9630
vn 0.0221 0.2908 -0.9565
vn -0.0453 0.9963 -0.0733
vn 0.0055 0.9976 -0.0686
vn 0.0061 0.9998 -0.0187
vn -0.0492 0.9986 -0.0187
vn 0.0659 0.9948 -0.0780
vn 0.1195 0.9877 -0.1006
vn 0.1314 0.9912 -0.0187
vn 0.0719 0.9972 -0.0187
vn -0.0503 0.9632 -0.2642
vn 0.0053 0.9672 -0.2538
vn 0.0686 0.9608 -0.2686
vn 0.1096 0.9498 -0.2931
vn 0.0058 0.0290 -0.9996
vn 0.0070 0.0418 -0.9991
vn 0.0790 0.5124 -0.8551
vn 0.1103 0.4901 -0.8647
vn 0.1546 0.7513 -0.6416
vn 0.1317 0.7823 -0.6088
vn 0.0394 0.1977 -0.9795
vn 0.0290 0.2381 -0.9708
vn 0.0043 0.0071 -1.0000
vn 0.0059 0.0173 -0.9998
vn 0.0338 0.0821 -0.9961
vn 0.0899 0.2846 -0.9544
vn 0.1065 0.3541 -0.9291
vn 0.0462 0.1403 -0.9890
vn 0.1691 0.9770 -0.1298
vn 0.2292 0.9622 -0.1469
vn 0.2338 0.9721 -0.0179
vn 0.1847 0.9826 -0.0187
vn 0.2729 0.9619 -0.0158
vn 0.2919 0.9453 -0.1456
vn 0.3043 0.9516 -0.0432
vn 0.3041 0.9525 -0.0145
vn 0.3115 0.9415 -0.1284
vn 0.3333 0.9427 -0.0164
vn 0.3171 0.9181 -0.2379
vn 0.1751 0.6625 -0.7284
vn 0.1908 0.5854 -0.7880
vn 0.2899 0.8371 -0.4639
vn 0.2574 0.8741 -0.4119
vn 0.1709 0.7002 -0.6932
vn 0.1977 0.8862 -0.4189
vn 0.1474 0.9350 -0.3227
vn 0.2987 0.9039 -0.3062
vn -0.2391 -0.9708 -0.0186
vn -0.2658 -0.9638 -0.0190
vn -0.2824 -0.9542 -0.0990
vn -0.2181 -0.9706 -0.1015
vn -0.2840 -0.9274 -0.2433
vn -0.2163 -0.9312 -0.2935
vn -0.2226 -0.8203 -0.5268
vn -0.2764 -0.8745 -0.3985
vn -0.1887 -0.6567 -0.7302
vn -0.1553 -0.5898 -0.7925
vn -0.1135 -0.3463 -0.9312
vn -0.0750 -0.2859 -0.9553
vn -0.0503 -0.1348 -0.9896
vn -0.0068 -0.0164 -0.9998
vn -0.0038 -0.0058 -1.0000
vn -0.0298 -0.0773 -0.9966
vn -0.3191 -0.9475 -0.0192
vn -0.3444 -0.9387 -0.0186
vn -0.3203 -0.9408 -0.1108
vn -0.3096 -0.9403 -0.1411
vn -0.2813 -0.7410 -0.6098
vn -0.1762 -0.4935 -0.8517
vn -0.2140 -0.6905 -0.6909
vn -0.2789 -0.8683 -0.4102
vn -0.3099 -0.7878 -0.5323
vn -0.2169 -0.5625 -0.7979
vn -0.3135 -0.8987 -0.3066
vn -0.1072 -0.2787 -0.9544
vn -0.0416 -0.0827 -0.9957
vn -0.0177 -0.0379 -0.9991
vn -0.0707 -0.2047 -0.9763
vn -0.2934 -0.9558 -0.0196
vn -0.3150 -0.9396 -0.1335
vn -0.3944 -0.9187 -0.0188
vn -0.4126 -0.9021 -0.1265
vn -0.3801 -0.9195 -0.1001
vn -0.3704 -0.9287 -0.0186
vn -0.4150 -0.9096 -0.0186
vn -0.3942 -0.9105 -0.1252
vn -0.3619 -0.8463 -0.3909
vn -0.3669 -0.8449 -0.3893
vn -0.2950 -0.6867 -0.6644
vn -0.2570 -0.6470 -0.7179
vn -0.2544 -0.5272 -0.8108
vn -0.1269 -0.2426 -0.9618
vn -0.0766 -0.1573 -0.9846
vn -0.1582 -0.3597 -0.9196
vn -0.4482 -0.8937 -0.0186
vn -0.4591 -0.8882 -0.0175
vn -0.4353 -0.8919 -0.1228
vn -0.4639 -0.8766 -0.1278
vn -0.6986 -0.2866 -0.6556
vn -0.5050 -0.3049 -0.8075
vn -0.4313 -0.5831 -0.6885
vn -0.5084 -0.7257 -0.4637
vn -0.4168 -0.8117 -0.4091
vn -0.3056 -0.5860 -0.7505
vn -0.2513 -0.2820 -0.9259
vn -0.4366 -0.8995 -0.0184
vn -0.4398 -0.8908 -0.1144
vn -0.3717 -0.7438 -0.5556
vn -0.3756 -0.8932 -0.2471
vn -0.4248 -0.8658 -0.2645
vn -0.9915 -0.1285 -0.0178
vn -0.9884 -0.1100 -0.1051
vn -0.7781 -0.6184 -0.1103
vn -0.7833 -0.6214 -0.0176
vn -0.8906 -0.1869 -0.4146
vn -0.7247 -0.5881 -0.3591
vn 0.0014 0.0014 -1.0000
vn 0.0083 0.0179 -0.9998
vn 0.0594 0.1323 -0.9894
vn 0.0753 0.2119 -0.9744
vn 0.0183 0.0417 -0.9990
vn -0.0056 -0.0086 -0.9999
vn -0.0015 -0.0015 -1.0000
vn 0.0008 0.0008 -1.0000
vn 0.0148 0.0248 -0.9996
vn 0.0345 0.0643 -0.9973
vn 0.0040 0.0056 -1.0000
vn 0.3550 0.9247 -0.1372
vn 0.4133 0.9008 -0.1331
vn 0.3953 0.9184 -0.0187
vn 0.3642 0.9312 -0.0182
vn 0.2981 0.7478 -0.5933
vn 0.1987 0.5059 -0.8394
vn 0.2647 0.6690 -0.6946
vn 0.3222 0.8519 -0.4128
vn 0.2554 0.6042 -0.7548
vn 0.3830 0.8247 -0.4161
vn 0.1405 0.3328 -0.9325
vn 0.0767 0.1405 -0.9871
vn 0.1701 0.3300 -0.9285
vn 0.2566 0.5161 -0.8172
vn 0.1113 0.2370 -0.9651
vn 0.4751 0.8797 -0.0187
vn 0.4864 0.8635 -0.1330
vn 0.5036 0.8549 -0.1245
vn 0.5012 0.8651 -0.0189
vn 0.4342 0.8915 -0.1291
vn 0.4515 0.8921 -0.0189
vn 0.3292 0.6541 -0.6810
vn 0.3028 0.5850 -0.7524
vn 0.4464 0.7918 -0.4168
vn 0.3995 0.8268 -0.3959
vn 0.3709 0.7419 -0.5587
vn 0.4306 0.8945 -0.1200
vn 0.4257 0.9047 -0.0191
vn 0.4885 0.8275 -0.2770
vn 0.4183 0.8675 -0.2691
vn -0.0659 -0.0624 -0.9959
vn -0.0446 -0.0036 -0.9990
vn -0.0012 -0.0012 -1.0000
vn -0.0166 -0.0283 -0.9995
vn -0.0434 0.0000 -0.9991
vn -0.0424 0.0010 -0.9991
vn 0.0048 0.0067 -1.0000
vn -0.8106 0.0000 -0.5856
vn -0.5480 -0.0011 -0.8365
vn -0.5370 -0.0830 -0.8395
vn -0.7891 -0.0611 -0.6112
vn -0.2472 -0.0035 -0.9690
vn -0.2494 -0.0852 -0.9646
vn -0.5489 0.0000 -0.8359
vn -0.2484 0.0000 -0.9687
vn -0.0278 0.0204 -0.9994
vn 0.0384 0.1150 -0.9926
vn 0.1268 0.2218 -0.9668
vn 0.0394 0.0636 -0.9972
vn 0.5009 0.8547 -0.1362
vn 0.5269 0.8375 -0.1451
vn 0.5252 0.8508 -0.0187
vn 0.5196 0.8542 -0.0189
vn 0.4214 0.7063 -0.5688
vn 0.2868 0.4823 -0.8277
vn 0.3624 0.6148 -0.7005
vn 0.4538 0.7918 -0.4087
vn 0.3052 0.5358 -0.7872
vn 0.4758 0.7596 -0.4435
vn 0.1455 0.2873 -0.9467
vn -0.5442 0.0054 -0.8389
vn -0.2168 0.0376 -0.9755
vn -0.2452 0.0035 -0.9695
vn -0.7696 0.0846 -0.6329
vn -0.4198 0.1603 -0.8934
vn -0.4966 0.0599 -0.8659
vn -0.8059 0.0055 -0.5920
vn 0.1122 0.3998 -0.9097
vn -0.1227 0.1674 -0.9782
vn 0.4203 0.6663 -0.6159
vn 0.5371 0.8345 -0.1234
vn 0.5207 0.8454 -0.1190
vn 0.2173 0.9670 -0.1331
vn 0.2192 0.9755 -0.0187
vn 0.1781 0.5766 -0.7974
vn -0.2270 0.5401 -0.8104
vn -0.3130 0.5190 -0.7954
vn 0.4179 0.7830 -0.4606
vn 0.0325 0.7781 -0.6273
vn 0.4641 0.8040 -0.3718
vn 0.5282 0.8378 -0.1384
vn 0.5126 0.8037 -0.3023
vn -0.9998 0.0000 -0.0186
vn -0.9936 0.0000 -0.1130
vn -0.9934 -0.0023 -0.1147
vn -0.9998 -0.0003 -0.0190
vn -0.9529 0.0000 -0.3033
vn -0.9427 -0.0251 -0.3328
vn -0.9323 0.0340 -0.3600
vn -0.6825 0.7306 -0.0196
vn -0.6607 0.7371 -0.1424
vn -0.9921 0.0743 -0.1011
vn -0.9960 0.0881 -0.0167
vn -0.6162 0.6355 -0.4653
vn -0.8605 0.1600 -0.4837
vn 0.5722 0.0325 0.8194
vn 0.8200 0.0437 0.5706
vn 0.8308 0.0814 0.5506
vn 0.6006 0.0599 0.7973
vn 0.9566 0.0440 0.2880
vn 0.9576 0.0720 0.2789
vn 0.9943 0.0481 0.0951
vn 0.9984 0.0531 0.0186
vn 0.9968 0.0774 0.0182
vn 0.9944 0.0695 0.0795
vn 0.6386 0.0895 0.7643
vn 0.8788 0.1387 0.4566
vn 0.8879 0.1861 0.4207
vn 0.6738 0.1184 0.7293
vn 0.9894 0.1085 0.0967
vn 0.9949 0.0999 0.0150
vn 0.9858 0.1674 0.0135
vn 0.9853 0.1661 0.0393
vn 0.9767 0.2139 0.0167
vn 0.9659 0.2125 0.1476
vn 0.9522 0.1910 0.2385
vn 0.9605 0.0948 0.2617
vn 0.7068 0.1422 0.6929
vn 0.9103 0.1881 0.3689
vn 0.8924 0.2241 0.3916
vn 0.7316 0.1686 0.6605
vn 0.9657 0.2142 0.1469
vn 0.9766 0.2145 0.0185
vn 0.9670 0.2543 0.0184
vn 0.9613 0.2403 0.1350
vn 0.9448 0.3044 0.1213
vn 0.9493 0.3140 0.0141
vn 0.9367 0.3500 0.0099
vn 0.9361 0.3499 0.0365
vn 0.9154 0.2741 0.2946
vn 0.2703 0.0159 0.9626
vn 0.2870 0.0275 0.9575
vn 0.0701 0.0105 0.9975
vn 0.0576 0.0049 0.9983
vn 0.3114 0.0475 0.9491
vn 0.3489 0.0707 0.9345
vn 0.1263 0.0305 0.9915
vn 0.0920 0.0206 0.9956
vn 0.0002 0.0002 1.0000
vn 0.0015 0.0012 1.0000
vn 0.0060 0.0033 1.0000
vn 0.0141 0.0048 0.9999
vn 0.3984 0.0915 0.9127
vn 0.5354 0.1600 0.8293
vn 0.2314 0.0649 0.9707
vn 0.1746 0.0418 0.9838
vn 0.5892 0.2062 0.7812
vn 0.8338 0.3071 0.4587
vn 0.8591 0.3236 0.3966
vn 0.6633 0.2344 0.7107
vn 0.3710 0.1508 0.9163
vn 0.2963 0.1048 0.9493
vn 0.0253 0.0064 0.9997
vn 0.0467 0.0188 0.9987
vn 0.0018 0.0018 1.0000
vn 0.0919 0.0421 0.9949
vn 0.1643 0.0748 0.9836
vn 0.0293 0.0170 0.9994
vn 0.0093 0.0058 0.9999
vn 0.7661 0.2588 0.5883
vn 0.9042 0.3588 0.2317
vn 0.9192 0.3679 0.1404
vn 0.9316 0.3633 0.0140
vn 0.5294 0.2525 0.8099
vn 0.7392 0.3732 0.5607
vn 0.7967 0.4425 0.4115
vn 0.5989 0.3122 0.7375
vn 0.8531 0.3480 0.3887
vn 0.6988 0.2742 0.6607
vn 0.8616 0.4318 0.2670
vn 0.9218 0.3664 0.1265
vn 0.9215 0.3880 0.0178
vn 0.8939 0.4479 0.0184
vn 0.8860 0.4494 0.1143
vn 0.8747 0.4843 0.0186
vn 0.8574 0.4985 0.1280
vn 0.8782 0.4620 0.1237
vn 0.8541 0.5197 0.0193
vn 0.8477 0.5185 0.1119
vn 0.2544 0.1237 0.9592
vn 0.3491 0.1851 0.9186
vn 0.1571 0.0924 0.9833
vn 0.0756 0.0439 0.9962
vn 0.5253 0.3206 0.7882
vn 0.7276 0.4530 0.5152
vn 0.7524 0.5115 0.4151
vn 0.5712 0.3716 0.7319
vn 0.6508 0.4849 0.5842
vn 0.4365 0.3157 0.8425
vn 0.2586 0.1703 0.9509
vn 0.8085 0.4495 0.3798
vn 0.6578 0.3711 0.6554
vn 0.8262 0.5006 0.2586
vn 0.8215 0.5699 0.0198
vn 0.8087 0.5760 0.1195
vn 0.5335 0.3972 0.7467
vn 0.7155 0.5549 0.4244
vn 0.7170 0.5858 0.3778
vn 0.5922 0.4837 0.6444
vn 0.7763 0.6146 0.1404
vn 0.7930 0.6090 0.0186
vn 0.7875 0.6161 0.0190
vn 0.7756 0.6131 0.1504
vn 0.8017 0.5974 0.0191
vn 0.7917 0.5972 0.1292
vn 0.7634 0.5769 0.2905
vn -0.0274 -0.0026 0.9996
vn -0.0310 -0.0009 0.9995
vn -0.0114 -0.0046 0.9999
vn -0.0204 -0.0044 0.9998
vn -0.2180 -0.0121 0.9759
vn -0.1913 -0.0244 0.9812
vn -0.4254 -0.0564 0.9032
vn -0.5161 -0.0327 0.8559
vn -0.1529 -0.0299 0.9878
vn -0.1086 -0.0335 0.9935
vn -0.3221 -0.0852 0.9429
vn -0.3801 -0.0724 0.9221
vn -0.0007 -0.0007 1.0000
vn -0.0041 -0.0027 1.0000
vn -0.0640 -0.0265 0.9976
vn -0.0301 -0.0144 0.9994
vn -0.1774 -0.0748 0.9813
vn -0.2560 -0.0800 0.9634
vn -0.0107 -0.0065 0.9999
vn -0.0021 -0.0021 1.0000
vn -0.0317 -0.0227 0.9992
vn -0.0932 -0.0567 0.9940
vn -0.7341 -0.0841 0.6738
vn -0.9289 -0.1066 0.3547
vn -0.9126 -0.0463 0.4063
vn -0.7517 -0.0637 0.6564
vn -0.9812 -0.1212 0.1503
vn -0.9924 -0.1215 0.0188
vn -0.9988 -0.0455 0.0187
vn -0.9871 -0.0461 0.1532
vn -0.6267 -0.1711 0.7602
vn -0.8655 -0.2705 0.4215
vn -0.9085 -0.1740 0.3800
vn -0.6941 -0.1258 0.7088
vn -0.9528 -0.2765 0.1256
vn -0.9684 -0.2489 0.0168
vn -0.9822 -0.1868 0.0178
vn -0.9708 -0.1929 0.1424
vn -0.9378 -0.3308 0.1054
vn -0.9478 -0.3184 0.0177
vn -0.9102 -0.3275 0.2535
vn -0.4421 -0.1939 0.8757
vn -0.7000 -0.2898 0.6527
vn -0.7563 -0.2868 0.5881
vn -0.5262 -0.1824 0.8305
vn -0.6041 -0.2966 0.7396
vn -0.8120 -0.3994 0.4256
vn -0.8865 -0.3299 0.3246
vn -0.8813 -0.4566 0.1216
vn -0.8969 -0.4418 0.0179
vn -0.9237 -0.3828 0.0181
vn -0.9247 -0.3627 0.1154
vn -0.2617 -0.1528 0.9530
vn -0.1468 -0.0974 0.9844
vn -0.3187 -0.2129 0.9236
vn -0.5277 -0.3205 0.7866
vn -0.5323 -0.3812 0.7559
vn -0.7088 -0.5538 0.4369
vn -0.7810 -0.4915 0.3854
vn -0.6189 -0.4234 0.6616
vn -0.7903 -0.5958 0.1430
vn -0.8040 -0.5943 0.0189
vn -0.8349 -0.5501 0.0188
vn -0.8400 -0.5266 0.1311
vn -0.7511 -0.6455 0.1382
vn -0.7608 -0.6487 0.0194
vn -0.8563 -0.5038 0.1140
vn -0.8627 -0.5054 0.0186
vn -0.7411 -0.4394 0.5076
vn -0.7183 -0.6268 0.3019
vn -0.8363 -0.4839 0.2578
vn -0.7622 -0.0201 0.6471
vn 0.0085 0.0058 0.9999
vn 0.0326 0.0234 0.9992
vn 0.0025 0.0025 1.0000
vn 0.0978 0.0759 0.9923
vn 0.2042 0.1515 0.9671
vn 0.0665 0.0523 0.9964
vn 0.0180 0.0157 0.9997
vn -0.0011 -0.0011 1.0000
vn -0.0077 -0.0055 1.0000
vn 0.0102 0.0091 0.9999
vn 0.3213 0.2479 0.9140
vn 0.5011 0.4443 0.7426
vn 0.2787 0.2663 0.9227
vn 0.1608 0.1357 0.9776
vn 0.4646 0.4818 0.7430
vn 0.6444 0.6676 0.3728
vn 0.6320 0.6759 0.3790
vn 0.5160 0.5597 0.6485
vn 0.6542 0.6556 0.3772
vn 0.5390 0.5298 0.6548
vn 0.6865 0.7120 0.1475
vn 0.6940 0.7197 0.0186
vn 0.6936 0.7201 0.0190
vn 0.6801 0.7171 0.1524
vn 0.6949 0.7189 0.0191
vn 0.6909 0.7071 0.1507
vn 0.0472 0.0467 0.9978
vn 0.1385 0.1465 0.9795
vn 0.0485 0.0535 0.9974
vn 0.0093 0.0096 0.9999
vn 0.5775 0.6860 0.4426
vn 0.4803 0.6234 0.6170
vn 0.3017 0.4063 0.8625
vn 0.4102 0.5013 0.7619
vn 0.2537 0.2951 0.9211
vn 0.1403 0.1820 0.9732
vn 0.6515 0.7584 0.0192
vn 0.6501 0.7443 0.1526
vn 0.6854 0.6202 0.3815
vn 0.7321 0.6638 0.1532
vn 0.7403 0.6720 0.0195
vn -0.0592 -0.0438 0.9973
vn -0.0155 -0.0133 0.9998
vn -0.0802 -0.0720 0.9942
vn -0.1886 -0.1432 0.9716
vn -0.0022 -0.0022 1.0000
vn -0.0185 -0.0187 0.9997
vn -0.3394 -0.3838 0.8588
vn -0.5331 -0.5925 0.6039
vn -0.6313 -0.6230 0.4619
vn -0.4427 -0.4395 0.7816
vn -0.3891 -0.3310 0.8597
vn -0.5996 -0.5220 0.6066
vn -0.1874 -0.1835 0.9650
vn -0.0754 -0.0808 0.9939
vn -0.0150 -0.0167 0.9997
vn -0.0477 -0.0643 0.9968
vn -0.1513 -0.1915 0.9698
vn 0.0010 0.0010 1.0000
vn 0.0111 0.0128 0.9999
vn 0.0652 0.0834 0.9944
vn 0.1659 0.2247 0.9602
vn 0.0857 0.1157 0.9896
vn 0.0198 0.0227 0.9995
vn -0.0013 -0.0013 1.0000
vn -0.0061 -0.0086 0.9999
vn 0.0033 0.0033 1.0000
vn 0.0289 0.0441 0.9986
vn 0.0084 0.0134 0.9999
vn -0.7084 -0.6926 0.1355
vn -0.7168 -0.6971 0.0191
vn 0.5876 0.7987 0.1294
vn 0.5814 0.8134 0.0186
vn 0.5692 0.8220 0.0185
vn 0.5708 0.8122 0.1205
vn 0.5948 0.8036 0.0188
vn 0.5966 0.7898 0.1422
vn 0.5274 0.7202 0.4508
vn 0.5549 0.7856 0.2736
vn 0.5800 0.7543 0.3076
vn 0.3238 0.4550 0.8295
vn 0.4797 0.6688 0.5680
vn 0.4802 0.7774 0.4063
vn 0.3720 0.6089 0.7006
vn 0.4418 0.7831 0.4377
vn 0.3019 0.5516 0.7775
vn 0.1747 0.2904 0.9408
vn 0.5480 0.8363 0.0187
vn 0.4990 0.8664 0.0189
vn 0.5005 0.8535 0.1452
vn 0.5248 0.8405 0.1348
vn 0.1029 0.1967 0.9750
vn 0.2445 0.4669 0.8499
vn 0.1422 0.2964 0.9444
vn 0.0615 0.1061 0.9925
vn 0.3935 0.8150 0.4255
vn 0.3808 0.8124 0.4417
vn 0.2572 0.5696 0.7806
vn 0.3019 0.6307 0.7149
vn 0.4347 0.8885 0.1467
vn 0.4252 0.9049 0.0180
vn 0.3747 0.9270 0.0174
vn 0.3818 0.9145 0.1337
vn 0.4575 0.8890 0.0186
vn 0.4429 0.8847 0.1456
vn 0.3767 0.7031 0.6031
vn 0.4610 0.8765 0.1387
vn 0.3647 0.8848 0.2900
vn 0.4445 0.8450 0.2974
vn 0.3667 0.5204 0.7712
vn -0.3933 -0.5292 0.7519
vn -0.4509 -0.6123 0.6494
vn -0.5525 -0.7432 0.3774
vn -0.5760 -0.6973 0.4266
vn -0.6251 -0.7680 0.1391
vn -0.6215 -0.7832 0.0180
vn -0.6743 -0.7383 0.0183
vn -0.6682 -0.7319 0.1335
vn -0.5774 -0.8036 0.1442
vn -0.5828 -0.8124 0.0182
vn -0.2217 -0.3226 0.9202
vn -0.1045 -0.1560 0.9822
vn -0.1662 -0.2749 0.9470
vn -0.3481 -0.5376 0.7680
vn -0.2337 -0.4685 0.8520
vn -0.3531 -0.7129 0.6059
vn -0.4020 -0.8120 0.4231
vn -0.3242 -0.6168 0.7173
vn -0.2236 -0.5732 0.7883
vn -0.3442 -0.8168 0.4631
vn -0.3754 -0.8715 0.3155
vn -0.4438 -0.8849 0.1411
vn -0.3864 -0.9126 0.1332
vn -0.4124 -0.9109 0.0156
vn -0.4488 -0.8935 0.0180
vn -0.4985 -0.7763 0.3859
vn -0.5203 -0.8418 0.1440
vn -0.5234 -0.8519 0.0184
vn -0.6452 -0.7051 0.2941
vn -0.3698 -0.8988 0.2355
vn -0.0259 -0.0356 0.9990
vn -0.0025 -0.0025 1.0000
vn -0.0084 -0.0134 0.9999
vn -0.0638 -0.1027 0.9927
vn -0.0892 -0.1945 0.9768
vn -0.0209 -0.0394 0.9990
vn -0.0390 -0.0856 0.9956
vn -0.1051 -0.2829 0.9534
vn -0.0016 -0.0016 1.0000
vn -0.0051 -0.0083 1.0000
vn -0.2015 -0.6637 0.7204
vn -0.1873 -0.7097 0.6792
vn -0.2084 -0.8880 0.4099
vn -0.2890 -0.8664 0.4071
vn -0.3311 -0.9324 0.1447
vn -0.3098 -0.9507 0.0144
vn -0.3650 -0.9309 0.0128
vn -0.3647 -0.9302 0.0419
vn -0.2405 -0.9599 0.1438
vn -0.2488 -0.9684 0.0174
vn -0.1592 -0.9800 0.1196
vn -0.0948 -0.9915 0.0892
vn -0.1043 -0.9944 0.0187
vn -0.1763 -0.9842 0.0188
vn -0.1389 -0.9403 0.3108
vn -0.0902 -0.9550 0.2827
vn -0.1188 -0.3658 0.9231
vn -0.0501 -0.1497 0.9875
vn -0.0428 -0.2108 0.9766
vn -0.1202 -0.5116 0.8508
vn -0.0066 -0.0199 0.9998
vn -0.0072 -0.0337 0.9994
vn -0.0819 -0.5342 0.8414
vn -0.0611 -0.5822 0.8107
vn -0.0894 -0.8235 0.5602
vn -0.1291 -0.7959 0.5916
vn -0.0325 -0.2523 0.9671
vn -0.0267 -0.2802 0.9596
vn -0.0085 -0.0493 0.9987
vn -0.0001 -0.0001 1.0000
vn -0.0006 -0.0007 1.0000
vn -0.0086 -0.0650 0.9979
vn -0.1624 -0.7664 0.6215
vn -0.0436 -0.9965 0.0716
vn 0.0099 -0.9977 0.0675
vn 0.0108 -0.9998 0.0187
vn -0.0473 -0.9987 0.0187
vn 0.0665 -0.9948 0.0774
vn 0.1146 -0.9884 0.0995
vn 0.1261 -0.9918 0.0186
vn 0.0725 -0.9972 0.0187
vn -0.0491 -0.9639 0.2617
vn 0.0109 -0.9675 0.2525
vn 0.0704 -0.9607 0.2686
vn 0.1053 -0.9507 0.2917
vn -0.0355 -0.6170 0.7862
vn 0.0083 -0.6276 0.7785
vn 0.0122 -0.8557 0.5174
vn -0.0542 -0.8467 0.5293
vn -0.0150 -0.2973 0.9547
vn 0.0038 -0.3015 0.9535
vn -0.0059 -0.0767 0.9970
vn -0.0008 -0.0020 1.0000
vn 0.0002 -0.0026 1.0000
vn 0.0015 -0.0799 0.9968
vn 0.0513 -0.6070 0.7931
vn 0.0701 -0.5657 0.8216
vn 0.1023 -0.8146 0.5709
vn 0.0751 -0.8401 0.5371
vn 0.0228 -0.2912 0.9564
vn 0.0304 -0.2682 0.9629
vn 0.0083 -0.0723 0.9974
vn 0.0008 -0.0015 1.0000
vn 0.0090 -0.0575 0.9983
vn 0.1632 -0.9782 0.1283
vn 0.2257 -0.9632 0.1463
vn 0.2311 -0.9728 0.0176
vn 0.1788 -0.9837 0.0186
vn 0.1760 -0.6662 0.7247
vn 0.1917 -0.5899 0.7844
vn 0.2919 -0.8394 0.4585
vn 0.2559 -0.8767 0.4074
vn 0.3036 -0.9519 0.0406
vn 0.3037 -0.9527 0.0123
vn 0.2733 -0.9618 0.0145
vn 0.2911 -0.9458 0.1439
vn 0.3128 -0.9415 0.1257
vn 0.3330 -0.9428 0.0151
vn 0.3170 -0.9196 0.2321
vn 0.1717 -0.7040 0.6891
vn 0.1953 -0.8881 0.4161
vn 0.1420 -0.9364 0.3208
vn 0.3025 -0.9040 0.3021
vn 0.0772 -0.5159 0.8532
vn 0.1102 -0.4947 0.8620
vn 0.1522 -0.7551 0.6377
vn 0.1275 -0.7851 0.6061
vn 0.0286 -0.2395 0.9705
vn 0.0390 -0.1999 0.9790
vn 0.0070 -0.0423 0.9991
vn 0.0058 -0.0295 0.9995
vn 0.1069 -0.3581 0.9276
vn 0.0463 -0.1427 0.9887
vn 0.0345 -0.0842 0.9959
vn 0.0911 -0.2879 0.9533
vn 0.0059 -0.0177 0.9998
vn 0.0045 -0.0073 1.0000
vn 0.0234 0.0439 0.9988
vn 0.0820 0.2140 0.9734
vn 0.0537 0.1394 0.9888
vn 0.0074 0.0183 0.9998
vn 0.1981 0.5071 0.8388
vn 0.3111 0.7427 0.5930
vn 0.3000 0.8634 0.4056
vn 0.2302 0.6913 0.6849
vn 0.3042 0.8646 0.4000
vn 0.2081 0.6519 0.7292
vn 0.1231 0.3501 0.9286
vn 0.3425 0.9394 0.0181
vn 0.3277 0.9446 0.0187
vn 0.3497 0.9278 0.1299
vn 0.3310 0.9338 0.1357
vn 0.0043 0.0066 1.0000
vn 0.0332 0.0774 0.9964
vn 0.0133 0.0422 0.9990
vn 0.0011 0.0011 1.0000
vn 0.2351 0.8118 0.5345
vn 0.1933 0.7813 0.5935
vn 0.1228 0.5429 0.8308
vn 0.1673 0.5812 0.7964
vn 0.0830 0.2831 0.9555
vn 0.0485 0.2330 0.9713
vn 0.2518 0.9676 0.0183
vn 0.2119 0.9771 0.0187
vn 0.2000 0.9701 0.1373
vn 0.2289 0.9679 0.1038
vn 0.3019 0.9532 0.0183
vn 0.3153 0.9439 0.0979
vn 0.1835 0.9032 0.3881
vn 0.2271 0.9268 0.2992
vn 0.3134 0.9168 0.2474
vn 0.0048 0.0264 0.9996
vn 0.0040 0.0176 0.9998
vn 0.0359 0.1855 0.9820
vn 0.0825 0.4163 0.9055
vn 0.0599 0.3700 0.9271
vn 0.0258 0.1432 0.9894
vn 0.0024 0.0113 0.9999
vn 0.0016 0.0073 1.0000
vn 0.0145 0.1163 0.9931
vn 0.0331 0.3405 0.9397
vn 0.0232 0.3230 0.9461
vn 0.0100 0.1001 0.9949
vn 0.1638 0.9183 0.3604
vn 0.1263 0.9147 0.3839
vn 0.0960 0.6943 0.7133
vn 0.1286 0.7204 0.6815
vn 0.1858 0.9824 0.0186
vn 0.1437 0.9895 0.0186
vn 0.1426 0.9788 0.1472
vn 0.1840 0.9718 0.1473
vn 0.0781 0.9119 0.4029
vn 0.0741 0.8976 0.4345
vn 0.0386 0.6636 0.7470
vn 0.0549 0.6762 0.7347
vn 0.0801 0.9848 0.1543
vn 0.0670 0.9976 0.0184
vn 0.0666 0.9976 0.0168
vn 0.0666 0.9967 0.0465
vn 0.0874 0.9960 0.0187
vn 0.0889 0.9852 0.1465
vn 0.1450 0.7441 0.6522
vn 0.0011 0.0046 1.0000
vn -0.0001 0.0037 1.0000
vn 0.0070 0.0887 0.9960
vn 0.0160 0.3104 0.9505
vn -0.0022 0.3060 0.9520
vn -0.0009 0.0846 0.9964
vn -0.0015 0.0053 1.0000
vn -0.0025 0.0093 1.0000
vn -0.0091 0.0914 0.9958
vn -0.0209 0.3133 0.9494
vn -0.0355 0.3309 0.9430
vn -0.0155 0.1078 0.9941
vn 0.0608 0.8909 0.4500
vn -0.0073 0.8567 0.5158
vn -0.0044 0.6463 0.7631
vn 0.0318 0.6517 0.7578
vn 0.0368 0.9652 0.2588
vn -0.0074 0.9648 0.2628
vn 0.0418 0.9990 0.0174
vn -0.0061 0.9998 0.0187
vn -0.0055 0.9982 0.0592
vn 0.0465 0.9943 0.0958
vn -0.0694 0.8929 0.4449
vn -0.0996 0.8979 0.4288
vn -0.0579 0.6694 0.7407
vn -0.0397 0.6547 0.7548
vn -0.0809 0.9957 0.0450
vn -0.0826 0.9965 0.0156
vn -0.1131 0.9934 0.0192
vn -0.1147 0.9813 0.1547
vn -0.0480 0.9987 0.0160
vn -0.0514 0.9940 0.0961
vn -0.1021 0.9664 0.2358
vn -0.0439 0.9664 0.2533
vn 0.0957 0.9673 0.2350
vn -0.0035 0.0153 0.9999
vn -0.0044 0.0232 0.9997
vn -0.0214 0.1321 0.9910
vn -0.0492 0.3579 0.9324
vn -0.0714 0.3943 0.9162
vn -0.0327 0.1690 0.9851
vn -0.0084 0.0355 0.9993
vn -0.0212 0.0602 0.9980
vn -0.0022 0.0026 1.0000
vn -0.1716 0.7655 0.6202
vn -0.1996 0.7913 0.5779
vn -0.1373 0.5475 0.8255
vn -0.1117 0.5133 0.8509
vn -0.0419 0.2146 0.9758
vn -0.0607 0.2614 0.9633
vn -0.1157 0.9124 0.3926
vn -0.1459 0.9189 0.3666
vn -0.1101 0.7112 0.6943
vn -0.0824 0.6876 0.7214
vn -0.1356 0.9906 0.0196
vn -0.1659 0.9860 0.0187
vn -0.1652 0.9750 0.1484
vn -0.1338 0.9799 0.1482
vn -0.1995 0.9797 0.0187
vn -0.2310 0.9728 0.0184
vn -0.2111 0.9707 0.1148
vn -0.1898 0.9715 0.1421
vn -0.1724 0.9017 0.3965
vn -0.1413 0.7307 0.6679
vn -0.1995 0.9287 0.3127
vn 0.1180 -0.6374 0.7615
vn -0.3774 -0.5445 0.7491
vn -0.5362 -0.7418 0.4027
vn 0.2776 -0.8758 0.3950
vn 0.2501 -0.9587 0.1355
vn -0.5908 -0.7892 0.1677
vn -0.6089 -0.7930 0.0189
vn 0.2514 -0.9677 0.0169
vn 0.4920 -0.8608 0.1300
vn 0.4893 -0.8719 0.0186
vn 0.4755 -0.8320 0.2858
vn 0.2678 -0.6708 0.6916
vn 0.3253 -0.8525 0.4092
vn 0.3003 -0.7510 0.5881
vn 0.2006 -0.5098 0.8366
vn 0.2558 -0.6072 0.7522
vn 0.3826 -0.8265 0.4129
vn 0.1409 -0.3357 0.9314
vn 0.3561 -0.9246 0.1355
vn 0.4141 -0.9008 0.1304
vn 0.3951 -0.9185 0.0182
vn 0.3650 -0.9308 0.0178
vn 0.3241 -0.6607 0.6770
vn 0.2970 -0.5950 0.7468
vn 0.4352 -0.8011 0.4110
vn 0.3927 -0.8317 0.3925
vn 0.4833 -0.8674 0.1181
vn 0.4810 -0.8765 0.0185
vn 0.4609 -0.8873 0.0183
vn 0.4753 -0.8703 0.1290
vn 0.4251 -0.8963 0.1265
vn 0.4430 -0.8964 0.0185
vn 0.2546 -0.5217 0.8142
vn 0.1116 -0.2413 0.9640
vn 0.0773 -0.1460 0.9863
vn 0.1687 -0.3380 0.9259
vn 0.4271 -0.8966 0.1167
vn 0.4228 -0.9060 0.0186
vn 0.3673 -0.7462 0.5553
vn 0.4685 -0.8417 0.2682
vn 0.4140 -0.8707 0.2654
vn 0.0761 -0.2149 0.9737
vn 0.0188 -0.0431 0.9989
vn 0.0085 -0.0188 0.9998
vn 0.0598 -0.1350 0.9890
vn 0.0014 -0.0014 1.0000
vn 0.0354 -0.0667 0.9971
vn 0.0042 -0.0061 1.0000
vn 0.0156 -0.0263 0.9995
vn -0.0021 0.0021 1.0000
vn -0.0065 0.0108 0.9999
vn 0.3457 -0.6366 0.6894
vn 0.4303 -0.8096 0.3993
vn 0.4080 -0.7213 0.5597
vn 0.2767 -0.4989 0.8213
vn 0.2634 -0.5550 0.7891
vn 0.4456 -0.7840 0.4322
vn 0.0876 -0.2951 0.9514
vn 0.4698 -0.8731 0.1303
vn 0.4973 -0.8566 0.1374
vn 0.4894 -0.8719 0.0186
vn 0.1185 -0.2325 0.9654
vn 0.0304 -0.0683 0.9972
vn -0.0988 -0.0224 0.9949
vn -0.0299 -0.1244 0.9918
vn -0.6299 -0.0442 0.7754
vn -0.9150 -0.0015 0.4034
vn -0.9122 -0.1152 0.3933
vn -0.5644 -0.1382 0.8139
vn 0.0791 -0.3947 0.9154
vn -0.1949 -0.1565 0.9683
vn -0.9891 0.0000 0.1476
vn -0.9910 -0.1327 0.0174
vn -0.9815 -0.1275 0.1426
vn -0.6775 0.0000 0.7355
vn -0.9158 0.0000 0.4017
vn -0.6720 -0.0062 0.7405
vn -0.3065 -0.0417 0.9510
vn -0.3379 -0.0036 0.9412
vn 0.3978 -0.6916 0.6029
vn -0.0059 -0.0074 1.0000
vn -0.0110 0.0000 0.9999
vn -0.1160 0.0000 0.9932
vn -0.1149 -0.0012 0.9934
vn -0.0223 0.0285 0.9993
vn -0.1229 0.0466 0.9913
vn -0.3412 0.0000 0.9400
vn -0.6658 0.0207 0.7458
vn -0.9144 0.0027 0.4048
vn -0.3306 0.0441 0.9428
vn -0.0055 0.0103 0.9999
vn -0.0382 0.1037 0.9939
vn -0.0552 0.1662 0.9845
vn -0.0090 0.0248 0.9997
vn -0.2630 0.8625 0.4324
vn -0.2568 0.8892 0.3786
vn -0.1921 0.6827 0.7050
vn -0.1735 0.6249 0.7612
vn -0.0930 0.3170 0.9439
vn -0.1203 0.3834 0.9157
vn -0.2753 0.9612 0.0187
vn -0.2931 0.9559 0.0188
vn -0.2908 0.9458 0.1446
vn -0.2954 0.9456 0.1361
vn -0.0225 0.0519 0.9984
vn -0.0772 0.2369 0.9685
vn -0.1142 0.3100 0.9439
vn -0.0465 0.1029 0.9936
vn -0.2228 0.7163 0.6613
vn -0.2751 0.8791 0.3893
vn -0.2862 0.7666 0.5748
vn -0.1885 0.5372 0.8221
vn -0.3211 0.8414 0.4347
vn -0.2142 0.6001 0.7707
vn -0.3225 0.9042 0.2799
vn -0.3353 0.9334 0.1276
vn -0.3257 0.9453 0.0187
vn -0.3426 0.9393 0.0189
vn -0.3567 0.9234 0.1413
vn -0.3103 0.9505 0.0186
vn -0.2944 0.9464 0.1327
vn -0.0756 0.1763 0.9814
vn -0.1524 0.3905 0.9079
vn -0.2315 0.5468 0.8046
vn -0.1449 0.2327 0.9617
vn -0.3101 0.8718 0.3792
vn -0.3245 0.8662 0.3800
vn -0.2679 0.7123 0.6487
vn -0.2373 0.6732 0.7004
vn -0.3581 0.9335 0.0188
vn -0.3680 0.9297 0.0186
vn -0.3442 0.9306 0.1243
vn -0.3516 0.9249 0.1445
vn -0.5449 0.5045 0.6697
vn -0.6889 0.6333 0.3526
vn -0.9086 0.1869 0.3734
vn -0.6413 0.1653 0.7493
vn -0.3993 0.8280 0.3937
vn -0.2954 0.5733 0.7642
vn -0.2824 0.2115 0.9357
vn -0.7276 0.6744 0.1256
vn -0.7367 0.6760 0.0167
vn -0.9702 0.2418 0.0171
vn -0.9641 0.2290 0.1347
vn -0.4636 0.8859 0.0182
vn -0.4693 0.8746 0.1216
vn -0.3281 0.7688 0.5489
vn -0.3748 0.9269 0.0186
vn -0.3804 0.9180 0.1121
vn -0.3686 0.8929 0.2587
vn -0.2732 0.9555 0.1114
vn -0.2557 0.9666 0.0184
vn -0.2675 0.9257 0.2676
vn 0.9984 0.0531 -0.0187
vn 0.9943 0.0481 -0.0951
vn 0.9944 0.0694 -0.0796
vn 0.9968 0.0774 -0.0182
vn 0.8200 0.0437 -0.5707
vn 0.5722 0.0325 -0.8195
vn 0.6006 0.0599 -0.7973
vn 0.8308 0.0814 -0.5506
vn 0.9576 0.0720 -0.2789
vn 0.9566 0.0440 -0.2880
vn 0.9949 0.0999 -0.0150
vn 0.9894 0.1085 -0.0967
vn 0.9853 0.1661 -0.0393
vn 0.9858 0.1674 -0.0135
vn 0.9659 0.2125 -0.1476
vn 0.9767 0.2139 -0.0167
vn 0.9522 0.1910 -0.2386
vn 0.8788 0.1387 -0.4566
vn 0.6386 0.0895 -0.7643
vn 0.6738 0.1184 -0.7294
vn 0.8878 0.1861 -0.4208
vn 0.9605 0.0948 -0.2618
vn 0.9766 0.2145 -0.0185
vn 0.9657 0.2142 -0.1470
vn 0.9613 0.2403 -0.1350
vn 0.9670 0.2543 -0.0184
vn 0.9102 0.1881 -0.3689
vn 0.7068 0.1422 -0.6930
vn 0.7316 0.1686 -0.6606
vn 0.8924 0.2241 -0.3917
vn 0.9493 0.3140 -0.0141
vn 0.9448 0.3044 -0.1214
vn 0.9361 0.3499 -0.0365
vn 0.9367 0.3500 -0.0099
vn 0.9154 0.2741 -0.2947
vn 0.0576 0.0049 -0.9983
vn 0.0701 0.0105 -0.9975
vn 0.2870 0.0275 -0.9575
vn 0.2703 0.0159 -0.9626
vn 0.0920 0.0206 -0.9956
vn 0.1263 0.0305 -0.9915
vn 0.3489 0.0707 -0.9345
vn 0.3113 0.0475 -0.9491
vn 0.0015 0.0012 -1.0000
vn 0.0002 0.0002 -1.0000
vn 0.0141 0.0048 -0.9999
vn 0.0060 0.0033 -1.0000
vn 0.1745 0.0418 -0.9838
vn 0.2314 0.0649 -0.9707
vn 0.5354 0.1599 -0.8293
vn 0.3983 0.0915 -0.9127
vn 0.8338 0.3071 -0.4588
vn 0.5892 0.2062 -0.7813
vn 0.6633 0.2344 -0.7107
vn 0.8591 0.3236 -0.3966
vn 0.2962 0.1048 -0.9493
vn 0.3710 0.1508 -0.9163
vn 0.0018 0.0018 -1.0000
vn 0.0467 0.0188 -0.9987
vn 0.0253 0.0064 -0.9997
vn 0.0093 0.0058 -0.9999
vn 0.0293 0.0170 -0.9994
vn 0.1643 0.0748 -0.9836
vn 0.0919 0.0421 -0.9949
vn 0.7661 0.2587 -0.5884
vn 0.9042 0.3588 -0.2318
vn 0.9192 0.3679 -0.1404
vn 0.9316 0.3633 -0.0140
vn 0.9215 0.3880 -0.0178
vn 0.9218 0.3664 -0.1265
vn 0.8860 0.4494 -0.1143
vn 0.8939 0.4479 -0.0184
vn 0.8574 0.4985 -0.1281
vn 0.8747 0.4843 -0.0186
vn 0.7391 0.3732 -0.5607
vn 0.5294 0.2525 -0.8099
vn 0.5989 0.3122 -0.7375
vn 0.7967 0.4425 -0.4116
vn 0.6988 0.2742 -0.6607
vn 0.8531 0.3480 -0.3887
vn 0.8615 0.4318 -0.2670
vn 0.8782 0.4620 -0.1238
vn 0.8477 0.5185 -0.1120
vn 0.8541 0.5197 -0.0193
vn 0.0756 0.0439 -0.9962
vn 0.1570 0.0924 -0.9833
vn 0.3490 0.1851 -0.9186
vn 0.2544 0.1237 -0.9592
vn 0.7275 0.4530 -0.5152
vn 0.5253 0.3206 -0.7882
vn 0.5712 0.3716 -0.7319
vn 0.7524 0.5114 -0.4151
vn 0.4365 0.3157 -0.8425
vn 0.6508 0.4849 -0.5842
vn 0.2586 0.1703 -0.9509
vn 0.8087 0.5760 -0.1196
vn 0.8215 0.5699 -0.0198
vn 0.6578 0.3711 -0.6555
vn 0.8085 0.4495 -0.3799
vn 0.8262 0.5005 -0.2587
vn 0.7930 0.6090 -0.0186
vn 0.7763 0.6146 -0.1404
vn 0.7756 0.6131 -0.1505
vn 0.7875 0.6161 -0.0190
vn 0.7917 0.5971 -0.1292
vn 0.8017 0.5974 -0.0191
vn 0.7155 0.5549 -0.4245
vn 0.5335 0.3972 -0.7468
vn 0.5922 0.4837 -0.6445
vn 0.7170 0.5858 -0.3779
vn 0.7634 0.5769 -0.2906
vn -0.0310 -0.0009 -0.9995
vn -0.0274 -0.0026 -0.9996
vn -0.0204 -0.0044 -0.9998
vn -0.0114 -0.0046 -0.9999
vn -0.5161 -0.0327 -0.8559
vn -0.4254 -0.0564 -0.9033
vn -0.1913 -0.0244 -0.9812
vn -0.2179 -0.0121 -0.9759
vn -0.3801 -0.0724 -0.9221
vn -0.3221 -0.0851 -0.9429
vn -0.1086 -0.0335 -0.9935
vn -0.1529 -0.0299 -0.9878
vn -0.0041 -0.0027 -1.0000
vn -0.0007 -0.0007 -1.0000
vn -0.2560 -0.0800 -0.9634
vn -0.1774 -0.0748 -0.9813
vn -0.0301 -0.0144 -0.9994
vn -0.0640 -0.0265 -0.9976
vn -0.0932 -0.0567 -0.9940
vn -0.0317 -0.0227 -0.9992
vn -0.0021 -0.0021 -1.0000
vn -0.0107 -0.0065 -0.9999
vn -0.9924 -0.1215 -0.0188
vn -0.9812 -0.1212 -0.1503
vn -0.9871 -0.0462 -0.1532
vn -0.9988 -0.0455 -0.0187
vn -0.9289 -0.1066 -0.3548
vn -0.7340 -0.0841 -0.6739
vn -0.7517 -0.0637 -0.6564
vn -0.9125 -0.0463 -0.4063
vn -0.9684 -0.2489 -0.0168
vn -0.9528 -0.2765 -0.1256
vn -0.9708 -0.1928 -0.1424
vn -0.9822 -0.1868 -0.0178
vn -0.9478 -0.3184 -0.0177
vn -0.9378 -0.3308 -0.1054
vn -0.8655 -0.2705 -0.4215
vn -0.6267 -0.1711 -0.7603
vn -0.6941 -0.1258 -0.7088
vn -0.9084 -0.1740 -0.3801
vn -0.9102 -0.3275 -0.2536
vn -0.8969 -0.4418 -0.0179
vn -0.8813 -0.4566 -0.1217
vn -0.9247 -0.3627 -0.1154
vn -0.9237 -0.3828 -0.0181
vn -0.7000 -0.2898 -0.6527
vn -0.4421 -0.1939 -0.8758
vn -0.5262 -0.1824 -0.8306
vn -0.7562 -0.2868 -0.5881
vn -0.8119 -0.3994 -0.4257
vn -0.6041 -0.2966 -0.7397
vn -0.8864 -0.3299 -0.3246
vn -0.5277 -0.3205 -0.7866
vn -0.3186 -0.2129 -0.9237
vn -0.1468 -0.0974 -0.9844
vn -0.2617 -0.1528 -0.9530
vn -0.8040 -0.5943 -0.0189
vn -0.7903 -0.5958 -0.1431
vn -0.8400 -0.5265 -0.1311
vn -0.8349 -0.5501 -0.0188
vn -0.7608 -0.6487 -0.0194
vn -0.7511 -0.6456 -0.1383
vn -0.7088 -0.5538 -0.4370
vn -0.5323 -0.3812 -0.7559
vn -0.6189 -0.4233 -0.6616
vn -0.7810 -0.4914 -0.3854
vn -0.8627 -0.5054 -0.0186
vn -0.8562 -0.5038 -0.1140
vn -0.7411 -0.4394 -0.5077
vn -0.7183 -0.6268 -0.3020
vn -0.8362 -0.4839 -0.2579
vn -0.7621 -0.0202 -0.6471
vn 0.0025 0.0025 -1.0000
vn 0.0326 0.0234 -0.9992
vn 0.0085 0.0058 -0.9999
vn 0.0180 0.0157 -0.9997
vn 0.0665 0.0523 -0.9964
vn 0.2042 0.1515 -0.9671
vn 0.0978 0.0759 -0.9923
vn -0.0077 -0.0055 -1.0000
vn -0.0011 -0.0011 -1.0000
vn 0.0102 0.0091 -0.9999
vn 0.1608 0.1357 -0.9776
vn 0.2787 0.2662 -0.9227
vn 0.5011 0.4442 -0.7427
vn 0.3213 0.2479 -0.9140
vn 0.6940 0.7197 -0.0186
vn 0.6865 0.7120 -0.1476
vn 0.6801 0.7171 -0.1525
vn 0.6936 0.7201 -0.0190
vn 0.6909 0.7071 -0.1507
vn 0.6949 0.7189 -0.0191
vn 0.6444 0.6676 -0.3729
vn 0.4646 0.4817 -0.7430
vn 0.5159 0.5597 -0.6485
vn 0.6320 0.6759 -0.3791
vn 0.5390 0.5297 -0.6549
vn 0.6542 0.6555 -0.3772
vn 0.0093 0.0096 -0.9999
vn 0.0485 0.0535 -0.9974
vn 0.1385 0.1465 -0.9795
vn 0.0472 0.0467 -0.9978
vn 0.4102 0.5012 -0.7619
vn 0.3017 0.4062 -0.8625
vn 0.4803 0.6234 -0.6170
vn 0.5775 0.6860 -0.4427
vn 0.1403 0.1820 -0.9732
vn 0.2537 0.2951 -0.9212
vn 0.6501 0.7443 -0.1527
vn 0.6515 0.7584 -0.0193
vn 0.7403 0.6720 -0.0195
vn 0.7321 0.6638 -0.1533
vn 0.6854 0.6202 -0.3816
vn -0.1886 -0.1431 -0.9716
vn -0.0802 -0.0720 -0.9942
vn -0.0155 -0.0133 -0.9998
vn -0.0592 -0.0438 -0.9973
vn -0.0185 -0.0187 -0.9997
vn -0.0022 -0.0022 -1.0000
vn -0.5331 -0.5925 -0.6040
vn -0.3393 -0.3837 -0.8588
vn -0.4426 -0.4394 -0.7816
vn -0.6313 -0.6230 -0.4620
vn -0.5996 -0.5220 -0.6067
vn -0.3891 -0.3309 -0.8597
vn -0.1874 -0.1835 -0.9650
vn -0.1512 -0.1915 -0.9698
vn -0.0477 -0.0643 -0.9968
vn -0.0150 -0.0167 -0.9997
vn -0.0754 -0.0808 -0.9939
vn 0.0111 0.0128 -0.9999
vn 0.0010 0.0010 -1.0000
vn 0.0198 0.0227 -0.9995
vn 0.0857 0.1156 -0.9896
vn 0.1658 0.2246 -0.9602
vn 0.0652 0.0834 -0.9944
vn -0.0061 -0.0086 -0.9999
vn -0.0013 -0.0013 -1.0000
vn 0.0084 0.0134 -0.9999
vn 0.0289 0.0441 -0.9986
vn 0.0033 0.0033 -1.0000
vn -0.7168 -0.6971 -0.0191
vn -0.7084 -0.6927 -0.1355
vn 0.5814 0.8134 -0.0186
vn 0.5876 0.7987 -0.1295
vn 0.5707 0.8122 -0.1206
vn 0.5692 0.8220 -0.0185
vn 0.5966 0.7898 -0.1422
vn 0.5948 0.8036 -0.0188
vn 0.5274 0.7202 -0.4509
vn 0.5549 0.7856 -0.2737
vn 0.5800 0.7543 -0.3076
vn 0.5248 0.8405 -0.1349
vn 0.5005 0.8534 -0.1452
vn 0.4990 0.8664 -0.0189
vn 0.5480 0.8363 -0.0187
vn 0.4797 0.6687 -0.5681
vn 0.3238 0.4550 -0.8295
vn 0.3720 0.6089 -0.7007
vn 0.4802 0.7773 -0.4064
vn 0.3019 0.5516 -0.7776
vn 0.4418 0.7831 -0.4377
vn 0.1747 0.2903 -0.9408
vn 0.0615 0.1061 -0.9925
vn 0.1422 0.2964 -0.9444
vn 0.2444 0.4669 -0.8499
vn 0.1029 0.1967 -0.9750
vn 0.4252 0.9049 -0.0180
vn 0.4347 0.8885 -0.1467
vn 0.3818 0.9145 -0.1337
vn 0.3747 0.9270 -0.0174
vn 0.4428 0.8847 -0.1457
vn 0.4575 0.8890 -0.0187
vn 0.3019 0.6307 -0.7149
vn 0.2572 0.5695 -0.7807
vn 0.3808 0.8123 -0.4417
vn 0.3935 0.8149 -0.4256
vn 0.3767 0.7031 -0.6032
vn 0.4610 0.8765 -0.1387
vn 0.4576 0.8890 -0.0187
vn 0.3647 0.8848 -0.2901
vn 0.4445 0.8449 -0.2975
vn 0.3666 0.5204 -0.7712
vn -0.6215 -0.7832 -0.0180
vn -0.6252 -0.7680 -0.1392
vn -0.6682 -0.7319 -0.1335
vn -0.6743 -0.7383 -0.0183
vn -0.5828 -0.8124 -0.0182
vn -0.5774 -0.8036 -0.1442
vn -0.5760 -0.6972 -0.4267
vn -0.5525 -0.7432 -0.3774
vn -0.4509 -0.6123 -0.6494
vn -0.3933 -0.5291 -0.7519
vn -0.3481 -0.5376 -0.7680
vn -0.1662 -0.2749 -0.9470
vn -0.1045 -0.1560 -0.9822
vn -0.2217 -0.3226 -0.9202
vn -0.4488 -0.8935 -0.0180
vn -0.4124 -0.9109 -0.0156
vn -0.3864 -0.9126 -0.1332
vn -0.4438 -0.8849 -0.1412
vn -0.3531 -0.7128 -0.6060
vn -0.2337 -0.4684 -0.8520
vn -0.3242 -0.6167 -0.7173
vn -0.4020 -0.8120 -0.4232
vn -0.3441 -0.8167 -0.4632
vn -0.2236 -0.5732 -0.7883
vn -0.3754 -0.8715 -0.3156
vn -0.5234 -0.8519 -0.0184
vn -0.5203 -0.8418 -0.1440
vn -0.4985 -0.7762 -0.3860
vn -0.6452 -0.7051 -0.2942
vn -0.3698 -0.8988 -0.2355
vn -0.0638 -0.1027 -0.9927
vn -0.0084 -0.0134 -0.9999
vn -0.0025 -0.0025 -1.0000
vn -0.0259 -0.0356 -0.9990
vn -0.1051 -0.2829 -0.9534
vn -0.0390 -0.0856 -0.9956
vn -0.0209 -0.0394 -0.9990
vn -0.0892 -0.1945 -0.9768
vn -0.0051 -0.0083 -1.0000
vn -0.0016 -0.0016 -1.0000
vn -0.3098 -0.9507 -0.0144
vn -0.3311 -0.9324 -0.1448
vn -0.3647 -0.9302 -0.0419
vn -0.3650 -0.9309 -0.0128
vn -0.2488 -0.9684 -0.0175
vn -0.2405 -0.9599 -0.1438
vn -0.2890 -0.8664 -0.4072
vn -0.2084 -0.8880 -0.4100
vn -0.1873 -0.7096 -0.6792
vn -0.2015 -0.6636 -0.7204
vn -0.1763 -0.9842 -0.0188
vn -0.1043 -0.9944 -0.0188
vn -0.0948 -0.9915 -0.0892
vn -0.1592 -0.9800 -0.1196
vn -0.0903 -0.9549 -0.2828
vn -0.1388 -0.9403 -0.3108
vn -0.1202 -0.5116 -0.8508
vn -0.0428 -0.2108 -0.9766
vn -0.0501 -0.1497 -0.9875
vn -0.1188 -0.3658 -0.9231
vn -0.0072 -0.0337 -0.9994
vn -0.0066 -0.0199 -0.9998
vn -0.1291 -0.7958 -0.5916
vn -0.0894 -0.8235 -0.5603
vn -0.0611 -0.5822 -0.8108
vn -0.0819 -0.5342 -0.8414
vn -0.0267 -0.2801 -0.9596
vn -0.0324 -0.2523 -0.9671
vn -0.0086 -0.0650 -0.9979
vn -0.0006 -0.0007 -1.0000
vn -0.0001 -0.0001 -1.0000
vn -0.0085 -0.0493 -0.9987
vn -0.1624 -0.7664 -0.6215
vn -0.0473 -0.9987 -0.0187
vn 0.0108 -0.9998 -0.0187
vn 0.0099 -0.9977 -0.0675
vn -0.0436 -0.9965 -0.0716
vn 0.0725 -0.9972 -0.0187
vn 0.1261 -0.9918 -0.0186
vn 0.1146 -0.9884 -0.0995
vn 0.0665 -0.9948 -0.0774
vn 0.0109 -0.9675 -0.2525
vn -0.0491 -0.9639 -0.2618
vn 0.1053 -0.9507 -0.2917
vn 0.0704 -0.9607 -0.2687
vn -0.0542 -0.8467 -0.5293
vn 0.0122 -0.8557 -0.5174
vn 0.0083 -0.6276 -0.7785
vn -0.0355 -0.6169 -0.7862
vn 0.0038 -0.3015 -0.9535
vn -0.0150 -0.2972 -0.9547
vn 0.0015 -0.0799 -0.9968
vn 0.0002 -0.0026 -1.0000
vn -0.0008 -0.0020 -1.0000
vn -0.0059 -0.0767 -0.9970
vn 0.0751 -0.8401 -0.5372
vn 0.1023 -0.8146 -0.5710
vn 0.0701 -0.5656 -0.8217
vn 0.0513 -0.6069 -0.7931
vn 0.0304 -0.2682 -0.9629
vn 0.0228 -0.2911 -0.9564
vn 0.0090 -0.0575 -0.9983
vn 0.0008 -0.0015 -1.0000
vn 0.0083 -0.0723 -0.9974
vn 0.1788 -0.9837 -0.0186
vn 0.2311 -0.9728 -0.0176
vn 0.2257 -0.9631 -0.1464
vn 0.1632 -0.9782 -0.1284
vn 0.3038 -0.9527 -0.0123
vn 0.3037 -0.9519 -0.0406
vn 0.2911 -0.9458 -0.1440
vn 0.2733 -0.9618 -0.0146
vn 0.3330 -0.9428 -0.0151
vn 0.3128 -0.9415 -0.1257
vn 0.3170 -0.9196 -0.2321
vn 0.2559 -0.8766 -0.4075
vn 0.2919 -0.8393 -0.4586
vn 0.1917 -0.5898 -0.7844
vn 0.1760 -0.6661 -0.7248
vn 0.1953 -0.8881 -0.4162
vn 0.1717 -0.7040 -0.6892
vn 0.1420 -0.9364 -0.3209
vn 0.3025 -0.9040 -0.3021
vn 0.1275 -0.7850 -0.6062
vn 0.1522 -0.7550 -0.6378
vn 0.1101 -0.4947 -0.8621
vn 0.0772 -0.5159 -0.8532
vn 0.0390 -0.1998 -0.9791
vn 0.0286 -0.2394 -0.9705
vn 0.0058 -0.0295 -0.9995
vn 0.0070 -0.0423 -0.9991
vn 0.0911 -0.2878 -0.9533
vn 0.0345 -0.0842 -0.9959
vn 0.0463 -0.1427 -0.9887
vn 0.1069 -0.3580 -0.9276
vn 0.0045 -0.0073 -1.0000
vn 0.0059 -0.0177 -0.9998
vn 0.0074 0.0183 -0.9998
vn 0.0537 0.1394 -0.9888
vn 0.0820 0.2140 -0.9734
vn 0.0233 0.0439 -0.9988
vn 0.3309 0.9338 -0.1357
vn 0.3497 0.9278 -0.1300
vn 0.3277 0.9446 -0.0187
vn 0.3425 0.9394 -0.0181
vn 0.3111 0.7426 -0.5931
vn 0.1981 0.5070 -0.8388
vn 0.2301 0.6912 -0.6850
vn 0.3000 0.8634 -0.4057
vn 0.2081 0.6518 -0.7293
vn 0.3041 0.8645 -0.4001
vn 0.1231 0.3500 -0.9286
vn 0.0011 0.0011 -1.0000
vn 0.0133 0.0421 -0.9990
vn 0.0332 0.0774 -0.9964
vn 0.0043 0.0066 -1.0000
vn 0.1673 0.5812 -0.7964
vn 0.1227 0.5429 -0.8308
vn 0.1933 0.7813 -0.5935
vn 0.2351 0.8118 -0.5345
vn 0.0485 0.2330 -0.9713
vn 0.0830 0.2830 -0.9555
vn 0.2288 0.9679 -0.1039
vn 0.2000 0.9701 -0.1374
vn 0.2119 0.9771 -0.0187
vn 0.2518 0.9676 -0.0183
vn 0.3153 0.9439 -0.0980
vn 0.3019 0.9532 -0.0183
vn 0.2270 0.9268 -0.2992
vn 0.1835 0.9032 -0.3881
vn 0.3133 0.9168 -0.2475
vn 0.0040 0.0176 -0.9998
vn 0.0048 0.0264 -0.9996
vn 0.0258 0.1432 -0.9894
vn 0.0599 0.3700 -0.9271
vn 0.0825 0.4162 -0.9055
vn 0.0359 0.1855 -0.9820
vn 0.0016 0.0073 -1.0000
vn 0.0024 0.0113 -0.9999
vn 0.0100 0.1001 -0.9949
vn 0.0232 0.3230 -0.9461
vn 0.0331 0.3405 -0.9397
vn 0.0145 0.1163 -0.9931
vn 0.1840 0.9718 -0.1473
vn 0.1426 0.9788 -0.1473
vn 0.1437 0.9894 -0.0187
vn 0.1858 0.9824 -0.0187
vn 0.1286 0.7204 -0.6816
vn 0.0960 0.6942 -0.7133
vn 0.1263 0.9147 -0.3839
vn 0.1637 0.9183 -0.3605
vn 0.0670 0.9976 -0.0184
vn 0.0801 0.9848 -0.1544
vn 0.0666 0.9967 -0.0465
vn 0.0666 0.9976 -0.0168
vn 0.0889 0.9852 -0.1465
vn 0.0874 0.9960 -0.0187
vn 0.0549 0.6761 -0.7347
vn 0.0386 0.6636 -0.7471
vn 0.0741 0.8976 -0.4345
vn 0.0781 0.9119 -0.4029
vn 0.1450 0.7440 -0.6522
vn -0.0001 0.0037 -1.0000
vn 0.0011 0.0046 -1.0000
vn -0.0009 0.0846 -0.9964
vn -0.0022 0.3060 -0.9520
vn 0.0160 0.3103 -0.9505
vn 0.0070 0.0887 -0.9960
vn -0.0025 0.0093 -1.0000
vn -0.0015 0.0053 -1.0000
vn -0.0155 0.1078 -0.9941
vn -0.0355 0.3308 -0.9430
vn -0.0209 0.3132 -0.9494
vn -0.0091 0.0914 -0.9958
vn 0.0464 0.9943 -0.0958
vn -0.0055 0.9982 -0.0592
vn -0.0061 0.9998 -0.0187
vn 0.0418 0.9990 -0.0174
vn 0.0318 0.6517 -0.7578
vn -0.0044 0.6463 -0.7631
vn -0.0073 0.8566 -0.5159
vn 0.0608 0.8909 -0.4501
vn -0.0074 0.9648 -0.2628
vn 0.0368 0.9652 -0.2588
vn -0.0826 0.9965 -0.0156
vn -0.0809 0.9957 -0.0450
vn -0.1147 0.9813 -0.1547
vn -0.1131 0.9934 -0.0192
vn -0.0514 0.9940 -0.0961
vn -0.0480 0.9987 -0.0160
vn -0.1021 0.9664 -0.2359
vn -0.0397 0.6547 -0.7549
vn -0.0579 0.6693 -0.7407
vn -0.0996 0.8979 -0.4289
vn -0.0694 0.8929 -0.4450
vn -0.0439 0.9664 -0.2533
vn 0.0957 0.9672 -0.2351
vn -0.0044 0.0232 -0.9997
vn -0.0035 0.0153 -0.9999
vn -0.0327 0.1690 -0.9851
vn -0.0714 0.3943 -0.9162
vn -0.0491 0.3579 -0.9325
vn -0.0214 0.1321 -0.9910
vn -0.0022 0.0026 -1.0000
vn -0.0212 0.0602 -0.9980
vn -0.0084 0.0355 -0.9993
vn -0.1117 0.5132 -0.8510
vn -0.1373 0.5474 -0.8255
vn -0.1995 0.7913 -0.5779
vn -0.1716 0.7654 -0.6202
vn -0.0607 0.2614 -0.9633
vn -0.0419 0.2146 -0.9758
vn -0.1338 0.9799 -0.1482
vn -0.1652 0.9750 -0.1484
vn -0.1659 0.9860 -0.0187
vn -0.1356 0.9906 -0.0196
vn -0.0824 0.6876 -0.7214
vn -0.1101 0.7111 -0.6944
vn -0.1459 0.9189 -0.3666
vn -0.1157 0.9124 -0.3927
vn -0.1898 0.9715 -0.1422
vn -0.2111 0.9707 -0.1149
vn -0.2310 0.9728 -0.0185
vn -0.1995 0.9797 -0.0187
vn -0.1413 0.7307 -0.6679
vn -0.1724 0.9017 -0.3966
vn -0.1995 0.9286 -0.3128
vn 0.2514 -0.9677 -0.0169
vn -0.6089 -0.7930 -0.0189
vn -0.5908 -0.7892 -0.1677
vn 0.2501 -0.9587 -0.1355
vn 0.2776 -0.8757 -0.3950
vn -0.5362 -0.7418 -0.4028
vn -0.3774 -0.5445 -0.7491
vn 0.1180 -0.6373 -0.7615
vn 0.4893 -0.8719 -0.0187
vn 0.4920 -0.8608 -0.1301
vn 0.4755 -0.8320 -0.2859
vn 0.3650 -0.9308 -0.0178
vn 0.3951 -0.9185 -0.0182
vn 0.4141 -0.9008 -0.1304
vn 0.3560 -0.9246 -0.1356
vn 0.3253 -0.8525 -0.4093
vn 0.2678 -0.6707 -0.6917
vn 0.2005 -0.5098 -0.8366
vn 0.3003 -0.7509 -0.5881
vn 0.3826 -0.8265 -0.4130
vn 0.2558 -0.6072 -0.7523
vn 0.1409 -0.3357 -0.9314
vn 0.4810 -0.8765 -0.0185
vn 0.4833 -0.8674 -0.1182
vn 0.4753 -0.8703 -0.1290
vn 0.4609 -0.8873 -0.0183
vn 0.4430 -0.8964 -0.0185
vn 0.4251 -0.8963 -0.1266
vn 0.3927 -0.8316 -0.3926
vn 0.4352 -0.8010 -0.4110
vn 0.2969 -0.5950 -0.7469
vn 0.3241 -0.6607 -0.6771
vn 0.1687 -0.3379 -0.9259
vn 0.0773 -0.1460 -0.9863
vn 0.1116 -0.2412 -0.9640
vn 0.2546 -0.5217 -0.8143
vn 0.4228 -0.9060 -0.0186
vn 0.4271 -0.8966 -0.1167
vn 0.3673 -0.7461 -0.5553
vn 0.4685 -0.8417 -0.2683
vn 0.4140 -0.8707 -0.2655
vn 0.0598 -0.1350 -0.9890
vn 0.0085 -0.0188 -0.9998
vn 0.0188 -0.0431 -0.9989
vn 0.0761 -0.2148 -0.9737
vn 0.0014 -0.0014 -1.0000
vn 0.0156 -0.0263 -0.9995
vn 0.0042 -0.0061 -1.0000
vn 0.0354 -0.0667 -0.9971
vn -0.0065 0.0108 -0.9999
vn -0.0021 0.0021 -1.0000
vn 0.4894 -0.8719 -0.0187
vn 0.4973 -0.8566 -0.1375
vn 0.4698 -0.8731 -0.1303
vn 0.4303 -0.8096 -0.3993
vn 0.3456 -0.6366 -0.6894
vn 0.2767 -0.4988 -0.8213
vn 0.4080 -0.7213 -0.5597
vn 0.4456 -0.7840 -0.4322
vn 0.2634 -0.5549 -0.7891
vn 0.0876 -0.2950 -0.9515
vn -0.0299 -0.1244 -0.9918
vn -0.0989 -0.0224 -0.9948
vn 0.0304 -0.0683 -0.9972
vn 0.1185 -0.2325 -0.9654
vn -0.9890 0.0000 -0.1476
vn -0.9815 -0.1275 -0.1426
vn -0.9910 -0.1327 -0.0174
vn -0.9150 -0.0015 -0.4034
vn -0.6298 -0.0442 -0.7755
vn -0.5644 -0.1381 -0.8139
vn -0.9121 -0.1152 -0.3933
vn -0.1949 -0.1564 -0.9683
vn 0.0791 -0.3946 -0.9154
vn -0.9157 0.0000 -0.4018
vn -0.6775 0.0000 -0.7355
vn -0.6720 -0.0062 -0.7406
vn -0.3379 -0.0036 -0.9412
vn -0.3065 -0.0417 -0.9510
vn 0.3977 -0.6916 -0.6029
vn -0.1149 -0.0012 -0.9934
vn -0.1160 0.0000 -0.9932
vn -0.0110 0.0000 -0.9999
vn -0.0059 -0.0074 -1.0000
vn -0.1229 0.0466 -0.9913
vn -0.0223 0.0285 -0.9993
vn -0.3412 0.0000 -0.9400
vn -0.9144 0.0027 -0.4048
vn -0.6658 0.0207 -0.7459
vn -0.3305 0.0441 -0.9428
vn -0.0090 0.0248 -0.9997
vn -0.0552 0.1662 -0.9845
vn -0.0382 0.1037 -0.9939
vn -0.0055 0.0103 -0.9999
vn -0.2954 0.9456 -0.1362
vn -0.2908 0.9458 -0.1446
vn -0.2931 0.9559 -0.0188
vn -0.2753 0.9612 -0.0187
vn -0.1735 0.6249 -0.7612
vn -0.1921 0.6827 -0.7050
vn -0.2568 0.8892 -0.3786
vn -0.2630 0.8625 -0.4324
vn -0.1203 0.3834 -0.9157
vn -0.0930 0.3169 -0.9439
vn -0.0465 0.1029 -0.9936
vn -0.1142 0.3100 -0.9439
vn -0.0772 0.2369 -0.9685
vn -0.0225 0.0519 -0.9984
vn -0.3257 0.9453 -0.0187
vn -0.3353 0.9334 -0.1277
vn -0.3568 0.9234 -0.1414
vn -0.3426 0.9393 -0.0189
vn -0.2944 0.9464 -0.1328
vn -0.3103 0.9505 -0.0186
vn -0.2751 0.8790 -0.3894
vn -0.2228 0.7163 -0.6613
vn -0.1885 0.5372 -0.8221
vn -0.2862 0.7666 -0.5748
vn -0.2142 0.6001 -0.7707
vn -0.3211 0.8414 -0.4348
vn -0.3225 0.9042 -0.2800
vn -0.1449 0.2327 -0.9617
vn -0.2315 0.5468 -0.8046
vn -0.1524 0.3905 -0.9079
vn -0.0756 0.1763 -0.9814
vn -0.3516 0.9249 -0.1446
vn -0.3442 0.9306 -0.1244
vn -0.3680 0.9297 -0.0186
vn -0.3581 0.9335 -0.0188
vn -0.2373 0.6731 -0.7004
vn -0.2679 0.7123 -0.6488
vn -0.3245 0.8662 -0.3800
vn -0.3101 0.8718 -0.3792
vn -0.7367 0.6760 -0.0167
vn -0.7276 0.6745 -0.1256
vn -0.9641 0.2290 -0.1347
vn -0.9702 0.2418 -0.0171
vn -0.4693 0.8746 -0.1216
vn -0.4636 0.8859 -0.0182
vn -0.6889 0.6333 -0.3527
vn -0.5449 0.5045 -0.6698
vn -0.6412 0.1653 -0.7493
vn -0.9086 0.1869 -0.3735
vn -0.2954 0.5733 -0.7643
vn -0.3993 0.8280 -0.3937
vn -0.2823 0.2115 -0.9357
vn -0.3281 0.7688 -0.5489
vn -0.3804 0.9180 -0.1122
vn -0.3748 0.9269 -0.0186
vn -0.3686 0.8928 -0.2588
vn -0.2557 0.9666 -0.0184
vn -0.2732 0.9555 -0.1115
vn -0.2675 0.9256 -0.2676
s 1
f 1//1 4//2 5//3 2//4
f 8//5 9//6 11//7 10//8
f 6//9 10//8 11//7 7//10
f 3//11 8//5 10//8 5//3
f 2//4 5//3 10//8 6//9
f 15//12 17//13 18//14 16//15
f 19//16 20//17 22//18 21//19
f 19//16 23//20 24//21 20//17
f 19//16 21//19 25//22 23//20
f 29//23 32//24 33//25 30//26
f 28//27 30//26 33//25 31//28
f 34//29 35//30 37//31 36//32
f 34//29 38//33 39//34 35//30
f 40//35 41//36 43//37 42//38
f 13//39 29//23 30//26 14//40
f 17//13 36//32 37//31 18//14
f 23//20 25//22 41//36 40//35
f 13//39 14//40 24//21 23//20
f 12//41 20//17 24//21 14//40
f 29//23 40//35 42//38 32//24
f 15//12 16//15 27//42 26//43
f 12//41 14//40 17//13 15//12
f 28//27 34//29 36//32 30//26
f 28//27 31//28 38//33 34//29
f 12//41 15//12 26//43 20//17
f 14//40 30//26 36//32 17//13
f 13//39 23//20 40//35 29//23
f 4//2 21//19 22//18 5//3
f 3//11 5//3 22//18 20//17
f 8//5 26//43 27//42 9//6
f 3//11 20//17 26//43 8//5
f 47//44 48//45 50//46 49//47
f 53//48 54//49 56//50 55//51
f 51//52 55//51 56//50 52//53
f 44//54 45//55 54//49 53//48
f 48//45 53//48 55//51 50//46
f 46//56 50//46 55//51 51//52
f 60//57 61//58 63//59 62//60
f 67//61 68//62 70//63 69//64
f 65//65 69//64 70//63 66//66
f 64//67 66//66 70//63 68//62
f 71//68 72//69 74//70 73//71
f 71//68 75//72 76//73 72//69
f 77//74 78//75 80//76 79//77
f 77//74 81//78 82//79 78//75
f 77//74 79//77 83//80 81//78
f 86//81 87//82 89//83 88//84
f 58//85 79//77 80//76 59//86
f 57//87 59//86 80//76 78//75
f 60//57 84//88 85//89 61//58
f 67//61 69//64 87//82 86//81
f 58//85 59//86 68//62 67//61
f 79//77 86//81 88//84 83//80
f 62//60 63//59 76//73 75//72
f 57//87 60//57 62//60 59//86
f 64//67 71//68 73//71 66//66
f 64//67 68//62 75//72 71//68
f 59//86 62//60 75//72 68//62
f 57//87 78//75 84//88 60//57
f 58//85 67//61 86//81 79//77
f 49//47 50//46 82//79 81//78
f 46//56 78//75 82//79 50//46
f 51//52 52//53 85//89 84//88
f 46//56 51//52 84//88 78//75
f 92//90 93//91 95//92 94//93
f 96//94 97//95 99//96 98//97
f 100//98 101//99 103//100 102//101
f 94//93 95//92 101//99 100//98
f 90//102 92//90 94//93 91//103
f 97//95 100//98 102//101 99//96
f 91//103 94//93 100//98 97//95
f 106//104 107//105 109//106 108//107
f 104//108 105//109 109//106 107//105
f 110//110 111//111 113//112 112//113
f 110//110 114//114 115//115 111//111
f 118//116 119//117 121//118 120//119
f 116//120 117//121 121//118 119//117
f 122//122 123//123 125//124 124//125
f 108//107 109//106 119//117 118//116
f 105//109 116//120 119//117 109//106
f 112//113 113//112 123//123 122//122
f 104//108 110//110 112//113 105//109
f 104//108 107//105 114//114 110//110
f 116//120 122//122 124//125 117//121
f 105//109 112//113 122//122 116//120
f 126//126 127//127 129//128 128//129
f 126//126 128//129 131//130 130//131
f 134//132 136//133 138//134 137//135
f 139//136 140//137 142//138 141//139
f 143//140 144//141 146//142 145//143
f 130//131 131//130 140//137 139//136
f 137//135 138//134 144//141 143//140
f 128//129 129//128 135//144 134//132
f 128//129 134//132 137//135 131//130
f 140//137 143//140 145//143 142//138
f 131//130 137//135 143//140 140//137
f 147//145 148//146 150//147 149//148
f 151//149 152//150 154//151 153//152
f 155//153 156//154 158//142 157//142
f 159//155 160//142 162//142 161//142
f 149//148 150//147 156//154 155//153
f 153//152 154//151 160//142 159//155
f 148//146 151//149 153//152 150//147
f 156//154 159//155 161//142 158//142
f 150//147 153//152 159//155 156//154
f 90//102 91//103 129//128 127//127
f 92//90 132//156 133//157 93//91
f 96//94 134//132 135//144 97//95
f 96//94 98//97 136//133 134//132
f 90//102 127//127 132//156 92//90
f 91//103 97//95 135//144 129//128
f 106//104 108//107 148//146 147//145
f 118//116 120//119 152//150 151//149
f 108//107 118//116 151//149 148//146
f 98//97 99//96 107//105 106//104
f 102//101 103//100 115//115 114//114
f 99//96 102//101 114//114 107//105
f 136//133 147//145 149//148 138//134
f 144//141 155//153 157//142 146//142
f 138//134 149//148 155//153 144//141
f 98//97 106//104 147//145 136//133
f 166//158 167//159 169//160 168//161
f 164//162 168//161 169//160 165//163
f 163//164 165//163 169//160 167//159
f 170//165 171//166 173//167 172//168
f 170//165 174//169 175//170 171//166
f 176//171 178//172 180//173 179//174
f 182//175 184//176 186//177 185//178
f 189//179 190//180 192//181 191//182
f 166//158 182//175 183//183 167//159
f 166//158 168//161 184//176 182//175
f 174//169 187//184 188//185 175//170
f 179//174 180//173 190//180 189//179
f 164//162 165//163 177//186 176//171
f 164//162 176//171 179//174 168//161
f 184//176 189//179 191//182 186//177
f 163//164 170//165 172//168 165//163
f 163//164 167//159 174//169 170//165
f 165//163 172//168 181//187 177//186
f 167//159 183//183 187//184 174//169
f 168//161 179//174 189//179 184//176
f 193//188 194//189 196//190 195//191
f 197//192 198//193 200//142 199//194
f 201//195 202//155 204//142 203//142
f 205//142 206//142 208//196 207//197
f 195//191 196//190 202//155 201//195
f 199//194 200//142 206//142 205//142
f 194//189 197//192 199//194 196//190
f 202//155 205//142 207//197 204//142
f 196//190 199//194 205//142 202//155
f 209//198 210//199 212//200 211//201
f 213//202 214//142 216//142 215//203
f 217//204 218//205 220//142 219//206
f 221//142 222//207 224//208 223//209
f 211//201 212//200 218//205 217//204
f 215//203 216//142 222//207 221//142
f 210//199 213//202 215//203 212//200
f 218//205 221//142 223//209 220//142
f 212//200 215//203 221//142 218//205
f 225//142 226//210 228//211 227//212
f 229//213 230//214 232//215 231//216
f 233//217 234//218 236//219 235//220
f 242//221 243//222 241//223 240//224
f 239//225 243//222 242//221 238//226
f 237//227 238//226 242//221 240//224
f 227//212 228//211 234//218 233//217
f 231//216 232//215 238//226 237//227
f 226//210 229//213 231//216 228//211
f 234//218 237//227 240//224 236//219
f 228//211 231//216 237//227 234//218
f 185//178 186//177 210//199 209//198
f 191//182 192//181 214//142 213//202
f 186//177 191//182 213//202 210//199
f 203//142 204//142 226//210 225//142
f 207//197 208//196 230//214 229//213
f 204//142 207//197 229//213 226//210
f 178//172 193//188 195//191 180//173
f 190//180 201//195 203//142 192//181
f 180//173 195//191 201//195 190//180
f 214//142 225//142 227//212 216//142
f 222//207 233//217 235//220 224//208
f 216//142 227//212 233//217 222//207
f 192//181 203//142 225//142 214//142
f 246//228 247//142 249//142 248//142
f 250//142 251//142 253//229 252//230
f 254//231 255//232 257//233 256//234
f 258//235 259//236 261//237 260//238
f 248//142 249//142 255//232 254//231
f 252//230 253//229 259//236 258//235
f 247//142 250//142 252//230 249//142
f 255//232 258//235 260//238 257//233
f 249//142 252//230 258//235 255//232
f 262//142 263//142 265//239 264//240
f 266//142 267//142 269//241 268//242
f 270//243 271//244 273//245 272//246
f 274//247 275//248 277//249 276//250
f 264//240 265//239 271//244 270//243
f 268//242 269//241 275//248 274//247
f 263//142 266//142 268//242 265//239
f 271//244 274//247 276//250 273//245
f 265//239 268//242 274//247 271//244
f 283//251 284//252 282//253 281//254
f 279//255 280//256 283//251 281//254
f 289//257 290//258 288//259 287//260
f 288//259 292//261 291//262 287//260
f 288//259 290//258 293//263 292//261
f 296//264 297//265 295//266 294//267
f 304//268 305//269 303//270 302//271
f 303//270 307//272 306//273 302//271
f 282//253 299//274 298//275 281//254
f 282//253 284//252 300//276 299//274
f 286//277 305//269 304//268 285//278
f 291//262 292//261 284//252 283//251
f 280//256 287//260 291//262 283//251
f 294//267 295//266 286//277 285//278
f 293//263 296//264 294//267 292//261
f 300//276 304//268 302//271 299//274
f 302//271 306//273 301//279 299//274
f 292//261 294//267 285//278 284//252
f 285//278 304//268 300//276 284//252
f 310//280 311//281 309//282 308//283
f 315//284 316//285 314//286 313//287
f 314//286 318//288 317//289 313//287
f 321//290 322//291 320//292 319//293
f 325//294 326//295 324//296 323//297
f 319//293 320//292 311//281 310//280
f 323//297 324//296 316//285 315//284
f 311//281 315//284 313//287 309//282
f 313//287 317//289 312//298 309//282
f 322//291 325//294 323//297 320//292
f 320//292 323//297 315//284 311//281
f 256//234 257//233 280//256 279//255
f 260//238 261//237 289//257 287//260
f 257//233 260//238 287//260 280//256
f 272//246 273//245 310//280 308//283
f 278//299 322//291 321//290 277//249
f 276//250 277//249 321//290 319//293
f 273//245 276//250 319//293 310//280
f 251//142 262//142 264//240 253//229
f 259//236 270//243 272//246 261//237
f 253//229 264//240 270//243 259//236
f 308//283 309//282 290//258 289//257
f 290//258 309//282 312//298 293//263
f 317//289 318//288 297//265 296//264
f 312//298 317//289 296//264 293//263
f 261//237 272//246 308//283 289//257
f 44//54 172//168 173//167 45//55
f 47//44 176//171 177//186 48//45
f 47//44 49//47 178//172 176//171
f 48//45 177//186 181//187 53//48
f 44//54 53//48 181//187 172//168
f 81//78 83//80 194//189 193//188
f 88//84 89//83 198//193 197//192
f 83//80 88//84 197//192 194//189
f 49//47 81//78 193//188 178//172
f 141//139 142//138 247//142 246//228
f 145//143 146//142 251//142 250//142
f 142//138 145//143 250//142 247//142
f 157//142 158//142 263//142 262//142
f 161//142 162//142 267//142 266//142
f 158//142 161//142 266//142 263//142
f 146//142 157//142 262//142 251//142
f 65//65 66//66 127//127 126//126
f 65//65 126//126 130//131 69//64
f 87//82 139//136 141//139 89//83
f 73//71 74//70 133//157 132//156
f 66//66 73//71 132//156 127//127
f 69//64 130//131 139//136 87//82
f 198//193 246//228 248//142 200//142
f 206//142 254//231 256//234 208//196
f 200//142 248//142 254//231 206//142
f 230//214 279//255 281//254 232//215
f 298//275 299//274 239//225 238//226
f 239//225 299//274 301//279 243//222
f 306//273 307//272 245//300 244//301
f 301//279 306//273 244//301 243//222
f 232//215 281//254 298//275 238//226
f 208//196 256//234 279//255 230//214
f 89//83 141//139 246//228 198//193
f 1//1 2//4 183//183 182//175
f 1//1 182//175 185//178 4//2
f 6//9 7//10 188//185 187//184
f 2//4 6//9 187//184 183//183
f 21//19 209//198 211//201 25//22
f 41//36 217//204 219//206 43//37
f 25//22 211//201 217//204 41//36
f 4//2 185//178 209//198 21//19
f 333//302 335//303 336//304 334//305
f 328//306 333//302 334//305 329//307
f 330//308 332//309 335//303 333//302
f 327//310 330//308 333//302 328//306
f 337//311 338//312 340//313 339//314
f 337//311 341//315 342//316 338//312
f 337//311 339//314 343//317 341//315
f 344//318 346//319 347//320 345//321
f 348//322 349//323 351//324 350//325
f 352//326 355//327 356//328 353//329
f 352//326 354//330 357//331 355//327
f 358//332 359//333 361//334 360//335
f 341//315 352//326 353//329 342//316
f 341//315 343//317 354//330 352//326
f 350//325 351//324 359//333 358//332
f 339//314 348//322 350//325 343//317
f 354//330 358//332 360//335 357//331
f 338//312 342//316 346//319 344//318
f 343//317 350//325 358//332 354//330
f 362//336 364//337 365//338 363//339
f 366//340 368//341 369//342 367//343
f 370//344 372//345 373//346 371//347
f 374//348 375//349 377//350 376//351
f 374//348 378//352 379//353 375//349
f 374//348 376//351 380//354 378//352
f 364//337 370//344 371//347 365//338
f 368//341 376//351 377//350 369//342
f 363//339 365//338 368//341 366//340
f 371//347 373//346 380//354 376//351
f 365//338 371//347 376//351 368//341
f 381//355 382//356 384//357 383//358
f 385//359 386//142 388//142 387//360
f 389//361 390//362 392//363 391//364
f 393//365 394//142 396//142 395//366
f 383//358 384//357 390//362 389//361
f 387//360 388//142 394//142 393//365
f 382//356 385//359 387//360 384//357
f 390//362 393//365 395//366 392//363
f 384//357 387//360 393//365 390//362
f 331//367 362//336 363//339 332//309
f 335//303 366//340 367//343 336//304
f 332//309 363//339 366//340 335//303
f 355//327 357//331 382//356 381//355
f 360//335 361//334 386//142 385//359
f 357//331 360//335 385//359 382//356
f 331//367 332//309 356//328 355//327
f 330//308 353//329 356//328 332//309
f 328//306 329//307 347//320 346//319
f 327//310 328//306 346//319 342//316
f 327//310 342//316 353//329 330//308
f 362//336 381//355 383//358 364//337
f 370//344 389//361 391//364 372//345
f 364//337 383//358 389//361 370//344
f 331//367 355//327 381//355 362//336
f 398//368 401//369 402//370 399//371
f 397//372 399//371 402//370 400//373
f 403//374 406//375 407//376 404//377
f 409//378 411//379 412//380 410//381
f 418//382 419//383 417//384 416//385
f 413//386 416//385 417//384 414//387
f 413//386 415//388 418//382 416//385
f 401//369 409//378 410//381 402//370
f 400//373 402//370 410//381 408//389
f 406//375 413//386 414//387 407//376
f 397//372 403//374 405//390 399//371
f 397//372 400//373 406//375 403//374
f 410//381 415//388 413//386 408//389
f 410//381 412//380 418//382 415//388
f 400//373 408//389 413//386 406//375
f 420//391 421//392 423//393 422//394
f 424//395 425//142 427//142 426//396
f 428//397 429//398 431//399 430//400
f 432//401 433//142 435//142 434//402
f 422//394 423//393 429//398 428//397
f 426//396 427//142 433//142 432//401
f 421//392 424//395 426//396 423//393
f 429//398 432//401 434//402 431//399
f 423//393 426//396 432//401 429//398
f 436//403 438//404 439//405 437//406
f 440//407 442//408 443//409 441//410
f 444//411 446//412 447//413 445//414
f 448//415 450//416 451//417 449//418
f 438//404 444//411 445//414 439//405
f 442//408 448//415 449//418 443//409
f 437//406 439//405 442//408 440//407
f 445//414 447//413 450//416 448//415
f 439//405 445//414 448//415 442//408
f 452//419 453//420 455//421 454//422
f 456//423 457//142 459//142 458//424
f 460//425 461//426 464//427 462//428
f 465//429 466//142 468//430 467//431
f 454//422 455//421 461//426 460//425
f 458//424 459//142 466//142 465//429
f 453//420 456//423 458//424 455//421
f 461//426 465//429 467//431 464//427
f 455//421 458//424 465//429 461//426
f 411//379 436//403 437//406 412//380
f 418//382 440//407 441//410 419//383
f 412//380 437//406 440//407 418//382
f 430//400 431//399 453//420 452//419
f 434//402 435//142 457//142 456//423
f 431//399 434//402 456//423 453//420
f 398//368 420//391 422//394 401//369
f 409//378 428//397 430//400 411//379
f 401//369 422//394 428//397 409//378
f 436//403 452//419 454//422 438//404
f 462//428 463//432 447//413 446//412
f 444//411 460//425 462//428 446//412
f 438//404 454//422 460//425 444//411
f 411//379 430//400 452//419 436//403
f 372//345 398//368 399//371 373//346
f 378//352 403//374 404//377 379//353
f 378//352 380//354 405//390 403//374
f 373//346 399//371 405//390 380//354
f 391//364 392//363 421//392 420//391
f 395//366 396//142 425//142 424//395
f 392//363 395//366 424//395 421//392
f 372//345 391//364 420//391 398//368
f 469//433 470//142 472//142 471//142
f 473//434 474//435 476//436 475//437
f 477//142 478//438 480//439 479//142
f 481//440 482//441 484//442 483//443
f 471//142 472//142 478//438 477//142
f 475//437 476//436 482//441 481//440
f 470//142 473//434 475//437 472//142
f 478//438 481//440 483//443 480//439
f 472//142 475//437 481//440 478//438
f 487//444 490//445 489//446 486//447
f 485//448 486//447 489//446 488//449
f 499//450 500//451 498//452 497//453
f 498//452 502//454 501//455 497//453
f 505//456 506//457 504//458 503//459
f 504//458 508//460 507//461 503//459
f 504//458 506//457 509//462 508//460
f 514//463 515//464 513//465 512//466
f 511//467 515//464 514//463 510//468
f 490//445 506//457 505//456 489//446
f 488//449 489//446 505//456 503//459
f 492//469 511//467 510//468 491//470
f 493//471 494//472 487//444 486//447
f 487//444 494//472 496//473 490//445
f 501//455 502//454 492//469 491//470
f 495//474 499//450 497//453 494//472
f 497//453 501//455 496//473 494//472
f 509//462 514//463 512//466 508//460
f 510//468 514//463 509//462 506//457
f 496//473 501//455 491//470 490//445
f 491//470 510//468 506//457 490//445
f 516//142 517//475 519//476 518//142
f 520//477 521//478 523//479 522//480
f 525//142 526//481 528//482 527//483
f 531//484 534//485 533//486 530//487
f 529//488 530//487 533//486 532//489
f 518//142 519//476 526//481 525//142
f 524//490 531//484 530//487 523//479
f 522//480 523//479 530//487 529//488
f 517//475 520//477 522//480 519//476
f 526//481 529//488 532//489 528//482
f 519//476 522//480 529//488 526//481
f 536//491 538//492 537//493 535//494
f 540//495 542//496 541//497 539//498
f 546//499 548//500 547//501 545//502
f 542//496 546//499 545//502 541//497
f 539//498 541//497 538//492 536//491
f 545//502 547//501 544//503 543//504
f 541//497 545//502 543//504 538//492
f 479//142 480//439 517//475 516//142
f 483//443 484//442 521//478 520//477
f 480//439 483//443 520//477 517//475
f 508//460 536//491 535//494 507//461
f 513//465 540//495 539//498 512//466
f 512//466 539//498 536//491 508//460
f 474//435 485//448 488//449 476//436
f 482//441 503//459 507//461 484//442
f 476//436 488//449 503//459 482//441
f 537//493 538//492 524//490 523//479
f 521//478 535//494 537//493 523//479
f 531//484 543//504 544//503 534//485
f 524//490 538//492 543//504 531//484
f 484//442 507//461 535//494 521//478
f 549//505 550//506 552//507 551//508
f 555//509 558//510 557//511 554//512
f 553//513 554//512 557//511 556//514
f 559//515 560//516 562//517 561//518
f 565//519 568//520 567//521 564//522
f 563//523 564//522 567//521 566//524
f 551//508 552//507 560//516 559//515
f 558//510 565//519 564//522 557//511
f 556//514 557//511 564//522 563//523
f 550//506 553//513 556//514 552//507
f 560//516 563//523 566//524 562//517
f 552//507 556//514 563//523 560//516
f 572//525 574//526 573//527 571//528
f 578//529 580//530 579//531 577//532
f 574//526 578//529 577//532 573//527
f 571//528 573//527 570//533 569//534
f 577//532 579//531 576//535 575//536
f 573//527 577//532 575//536 570//533
f 581//142 582//537 584//538 583//142
f 587//539 590//540 589//541 586//542
f 585//543 586//542 589//541 588//544
f 591//142 592//545 594//546 593//142
f 595//547 596//548 598//549 597//550
f 583//142 584//538 592//545 591//142
f 588//544 589//541 596//548 595//547
f 582//537 585//543 588//544 584//538
f 592//545 595//547 597//550 594//546
f 584//538 588//544 595//547 592//545
f 603//551 605//552 604//553 602//554
f 607//555 609//556 608//557 606//558
f 611//559 612//560 614//561 613//562
f 614//561 617//563 616//564 613//562
f 611//559 613//562 616//564 615//565
f 601//566 607//555 606//558 600//567
f 605//552 612//560 611//559 604//553
f 602//554 604//553 601//566 599//568
f 609//556 615//565 616//564 610//569
f 611//559 615//565 609//556 607//555
f 604//553 611//559 607//555 601//566
f 561//518 562//517 582//537 581//142
f 568//520 587//539 586//542 567//521
f 566//524 567//521 586//542 585//543
f 562//517 566//524 585//543 582//537
f 580//530 603//551 602//554 579//531
f 579//531 602//554 599//568 576//535
f 555//509 569//534 570//533 558//510
f 565//519 575//536 576//535 568//520
f 558//510 570//533 575//536 565//519
f 589//541 590//540 601//566 600//567
f 587//539 599//568 601//566 590//540
f 596//548 606//558 608//557 598//549
f 589//541 600//567 606//558 596//548
f 568//520 576//535 599//568 587//539
f 527//483 528//482 550//506 549//505
f 534//485 555//509 554//512 533//486
f 532//489 533//486 554//512 553//513
f 528//482 532//489 553//513 550//506
f 548//500 572//525 571//528 547//501
f 547//501 571//528 569//534 544//503
f 534//485 544//503 569//534 555//509
f 620//570 622//571 623//572 621//573
f 618//574 619//575 622//571 620//570
f 624//576 627//577 628//578 625//579
f 624//576 626//580 629//581 627//577
f 632//582 633//583 635//584 634//585
f 638//586 639//587 637//588 636//589
f 638//586 641//590 642//591 639//587
f 637//588 639//587 642//591 640//592
f 643//593 645//594 646//595 644//596
f 647//597 648//598 650//599 649//600
f 627//577 636//589 637//588 628//578
f 627//577 629//581 638//586 636//589
f 630//601 643//593 644//596 631//602
f 634//585 635//584 648//598 647//597
f 626//580 632//582 634//585 629//581
f 638//586 647//597 649//600 641//590
f 637//588 640//592 645//594 643//593
f 628//578 637//588 643//593 630//601
f 629//581 634//585 647//597 638//586
f 652//603 654//604 655//605 653//606
f 658//607 659//608 657//609 656//610
f 658//607 660//611 661//612 659//608
f 662//613 663//614 666//615 664//616
f 675//617 676//618 674//619 673//620
f 670//621 673//620 674//619 671//622
f 670//621 672//623 675//617 673//620
f 677//624 679//625 680//626 678//627
f 660//611 668//628 669//629 661//612
f 664//616 670//621 671//622 665//630
f 664//616 666//615 672//623 670//621
f 664//616 665//630 655//605 654//604
f 652//603 662//613 664//616 654//604
f 677//624 678//627 669//629 668//628
f 653//606 658//607 656//610 651//631
f 653//606 655//605 660//611 658//607
f 671//622 674//619 679//625 677//624
f 671//622 677//624 668//628 667//632
f 655//605 667//632 668//628 660//611
f 655//605 665//630 671//622 667//632
f 641//590 652//603 653//606 642//591
f 640//592 642//591 653//606 651//631
f 645//594 656//610 657//609 646//595
f 649//600 650//599 663//614 662//613
f 640//592 651//631 656//610 645//594
f 641//590 649//600 662//613 652//603
f 618//574 625//579 628//578 619//575
f 630//601 631//602 623//572 622//571
f 628//578 630//601 622//571 619//575
f 685//633 686//634 684//635 683//636
f 682//637 685//633 683//636 681//638
f 674//619 676//618 682//637 681//638
f 679//625 683//636 684//635 680//626
f 674//619 681//638 683//636 679//625
f 687//142 688//639 690//142 689//142
f 691//640 692//641 694//642 693//643
f 695//644 696//142 698//142 697//645
f 699//646 700//647 702//648 701//649
f 689//142 690//142 696//142 695//644
f 693//643 694//642 700//647 699//646
f 688//639 691//640 693//643 690//142
f 696//142 699//646 701//649 698//142
f 690//142 693//643 699//646 696//142
f 703//650 704//651 706//652 705//653
f 706//652 709//654 708//655 705//653
f 703//650 705//653 708//655 707//656
f 711//657 713//658 712//659 710//660
f 717//661 718//662 721//663 720//664
f 723//665 725//666 724//667 722//668
f 729//669 730//670 732//671 731//672
f 728//673 730//670 729//669 727//674
f 709//654 719//675 718//662 708//655
f 707//656 708//655 718//662 717//661
f 716//676 728//673 727//674 715//677
f 718//662 719//675 723//665 722//668
f 718//662 722//668 724//667 721//663
f 712//659 713//658 716//676 715//677
f 710//660 712//659 709//654 706//652
f 725//666 729//669 731//672 726//678
f 727//674 729//669 725//666 723//665
f 709//654 712//659 715//677 714//679
f 715//677 727//674 723//665 714//679
f 709//654 714//679 723//665 719//675
f 733//680 734//681 736//682 735//683
f 737//142 738//684 740//685 739//686
f 745//687 746//688 744//689 743//690
f 741//691 742//692 745//687 743//690
f 751//693 752//688 750//688 749//693
f 747//694 748//694 751//693 749//693
f 735//683 736//682 742//692 741//691
f 739//686 740//685 748//694 747//694
f 734//681 737//142 739//686 736//682
f 749//693 750//688 746//688 745//687
f 742//692 747//694 749//693 745//687
f 736//682 739//686 747//694 742//692
f 753//695 754//696 756//697 755//698
f 757//699 758//700 760//701 759//702
f 760//701 763//703 762//704 759//702
f 757//699 759//702 762//704 761//705
f 765//706 767//707 766//708 764//709
f 772//710 773//688 771//688 770//693
f 768//711 769//712 772//710 770//693
f 779//713 780//714 778//715 777//716
f 774//717 775//718 779//713 777//716
f 755//698 756//697 769//712 768//711
f 763//703 776//719 775//718 762//704
f 761//705 762//704 775//718 774//717
f 754//696 757//699 761//705 756//697
f 777//716 778//715 773//688 772//710
f 769//712 774//717 777//716 772//710
f 764//709 766//708 763//703 760//701
f 756//697 761//705 774//717 769//712
f 697//645 698//142 734//681 733//680
f 701//649 702//648 738//684 737//142
f 698//142 701//649 737//142 734//681
f 720//664 721//663 754//696 753//695
f 725//666 758//700 757//699 724//667
f 725//666 726//678 760//701 758//700
f 732//671 765//706 764//709 731//672
f 731//672 764//709 760//701 726//678
f 721//663 724//667 757//699 754//696
f 692//641 703//650 707//656 694//642
f 700//647 717//661 720//664 702//648
f 694//642 707//656 717//661 700//647
f 738//684 753//695 755//698 740//685
f 770//693 771//688 752//688 751//693
f 748//694 768//711 770//693 751//693
f 740//685 755//698 768//711 748//694
f 702//648 720//664 753//695 738//684
f 785//720 788//721 787//722 784//723
f 785//720 786//724 789//725 788//721
f 790//726 791//707 793//707 792//727
f 793//707 795//728 794//729 792//727
f 783//707 791//707 790//726 782//730
f 785//720 790//726 792//727 786//724
f 792//727 794//729 789//725 786//724
f 782//730 790//726 785//720 781//731
f 800//732 801//733 799//734 798//735
f 806//732 807//733 805//733 804//732
f 804//732 805//733 801//733 800//732
f 797//736 800//732 798//735 796//737
f 803//736 806//732 804//732 802//736
f 802//736 804//732 800//732 797//736
f 812//732 813//733 811//733 810//732
f 818//732 819//733 817//733 816//732
f 816//732 817//733 813//733 812//732
f 809//736 812//732 810//732 808//736
f 815//738 818//732 816//732 814//736
f 814//736 816//732 812//732 809//736
f 810//732 811//733 807//733 806//732
f 808//736 810//732 806//732 803//736
f 824//739 825//740 823//741 822//742
f 821//743 824//739 822//742 820//744
f 744//689 746//688 797//736 796//737
f 750//688 752//688 803//736 802//736
f 746//688 750//688 802//736 797//736
f 771//688 773//688 809//736 808//736
f 778//715 780//714 815//738 814//736
f 773//688 778//715 814//736 809//736
f 752//688 771//688 808//736 803//736
f 788//721 789//725 821//743 820//744
f 795//728 825//740 824//739 794//729
f 794//729 824//739 821//743 789//725
f 775//718 776//719 785//720 784//723
f 787//722 788//721 780//714 779//713
f 775//718 784//723 787//722 779//713
f 766//708 767//707 783//707 782//730
f 763//703 766//708 782//730 781//731
f 763//703 781//731 785//720 776//719
f 822//742 823//741 819//733 818//732
f 820//744 822//742 818//732 815//738
f 780//714 788//721 820//744 815//738
f 450//416 620//570 621//573 451//417
f 447//413 618//574 620//570 450//416
f 462//428 624//576 625//579 463//432
f 462//428 464//427 626//580 624//576
f 467//431 468//430 633//583 632//582
f 464//427 467//431 632//582 626//580
f 447//413 463//432 625//579 618//574
f 593//142 594//546 688//639 687//142
f 597//550 598//549 692//641 691//640
f 594//546 597//550 691//640 688//639
f 609//556 704//651 703//650 608//557
f 609//556 610//569 706//652 704//651
f 617//563 711//657 710//660 616//564
f 616//564 710//660 706//652 610//569
f 598//549 608//557 703//650 692//641
f 349//323 469//433 471//142 351//324
f 359//333 477//142 479//142 361//334
f 351//324 471//142 477//142 359//333
f 386//142 516//142 518//142 388//142
f 394//142 525//142 527//483 396//142
f 388//142 518//142 525//142 394//142
f 361//334 479//142 516//142 386//142
f 425//142 549//505 551//508 427//142
f 433//142 559//515 561//518 435//142
f 427//142 551//508 559//515 433//142
f 457//142 581//142 583//142 459//142
f 466//142 591//142 593//142 468//430
f 459//142 583//142 591//142 466//142
f 435//142 561//518 581//142 457//142
f 396//142 527//483 549//505 425//142
f 633//583 687//142 689//142 635//584
f 648//598 695//644 697//645 650//599
f 635//584 689//142 695//644 648//598
f 663//614 733//680 735//683 666//615
f 743//690 744//689 676//618 675//617
f 672//623 741//691 743//690 675//617
f 666//615 735//683 741//691 672//623
f 650//599 697//645 733//680 663//614
f 798//735 799//734 686//634 685//633
f 796//737 798//735 685//633 682//637
f 676//618 744//689 796//737 682//637
f 468//430 593//142 687//142 633//583
f 32//24 339//314 340//313 33//25
f 31//28 33//25 340//313 338//312
f 38//33 344//318 345//321 39//34
f 42//38 43//37 349//323 348//322
f 31//28 338//312 344//318 38//33
f 32//24 42//38 348//322 339//314
f 219//206 220//142 470//142 469//433
f 223//209 224//208 474//435 473//434
f 220//142 223//209 473//434 470//142
f 235//220 236//219 486//447 485//448
f 241//223 494//472 493//471 240//224
f 241//223 243//222 495//474 494//472
f 245//300 500//451 499//450 244//301
f 244//301 499//450 495//474 243//222
f 236//219 240//224 493//471 486//447
f 224//208 235//220 485//448 474//435
f 43//37 219//206 469//433 349//323
f 828//745 829//746 831//747 830//748
f 826//749 830//748 831//747 827//750
f 832//751 835//752 836//753 833//754
f 829//746 834//755 835//752 831//747
f 827//750 831//747 835//752 832//751
f 837//756 839//757 840//758 838//759
f 846//760 847//761 849//762 848//763
f 846//760 850//764 851//765 847//761
f 851//765 852//766 849//762 847//761
f 853//767 854//768 856//769 855//770
f 853//767 857//771 858//772 854//768
f 860//773 863//774 864//775 861//776
f 862//777 863//774 860//773 859//778
f 867//779 868//780 866//781 865//782
f 839//757 855//770 856//769 840//758
f 842//783 860//773 861//776 843//784
f 865//782 866//781 852//766 851//765
f 837//756 838//759 845//785 844//786
f 842//783 843//784 851//765 850//764
f 842//783 850//764 846//760 841//787
f 864//775 867//779 865//782 861//776
f 838//759 840//758 842//783 841//787
f 854//768 859//778 860//773 856//769
f 854//768 858//772 862//777 859//778
f 838//759 841//787 846//760 845//785
f 840//758 856//769 860//773 842//783
f 861//776 865//782 851//765 843//784
f 828//745 844//786 845//785 829//746
f 835//752 848//763 849//762 836//753
f 846//760 848//763 835//752 834//755
f 829//746 845//785 846//760 834//755
f 873//788 874//789 876//790 875//791
f 871//792 875//791 876//790 872//793
f 878//794 879//795 881//796 880//797
f 869//798 870//799 874//789 873//788
f 874//789 878//794 880//797 876//790
f 872//793 876//790 880//797 877//800
f 882//801 883//802 885//803 884//804
f 889//805 890//806 892//807 891//808
f 889//805 893//809 894//810 890//806
f 898//811 899//812 901//813 900//814
f 896//815 900//814 901//813 897//816
f 898//811 900//814 896//815 895//817
f 904//818 905//819 907//820 906//821
f 904//818 908//822 909//823 905//819
f 909//823 910//824 907//820 905//819
f 913//825 914//826 912//827 911//828
f 882//801 902//829 903//830 883//802
f 887//831 906//821 907//820 888//832
f 904//818 906//821 887//831 886//833
f 911//828 912//827 901//813 899//812
f 884//804 885//803 894//810 893//809
f 887//831 888//832 899//812 898//811
f 910//824 913//825 911//828 907//820
f 883//802 886//833 887//831 885//803
f 890//806 895//817 896//815 892//807
f 890//806 894//810 898//811 895//817
f 885//803 887//831 898//811 894//810
f 883//802 903//830 904//818 886//833
f 907//820 911//828 899//812 888//832
f 871//792 872//793 903//830 902//829
f 880//797 881//796 909//823 908//822
f 880//797 908//822 904//818 877//800
f 872//793 877//800 904//818 903//830
f 915//834 916//835 918//836 917//837
f 921//838 922//839 924//840 923//841
f 925//842 926//843 928//844 927//845
f 917//837 918//836 922//839 921//838
f 916//835 919//846 920//847 918//836
f 922//839 925//842 927//845 924//840
f 918//836 920//847 925//842 922//839
f 929//848 930//849 932//850 931//851
f 929//848 933//852 934//853 930//849
f 937//854 938//855 940//856 939//857
f 937//854 939//857 936//858 935//859
f 941//860 942//861 944//862 943//863
f 947//864 948//865 950//866 949//867
f 947//864 949//867 946//868 945//869
f 931//851 932//850 942//861 941//860
f 939//857 940//856 948//865 947//864
f 939//857 947//864 945//869 936//858
f 930//849 935//859 936//858 932//850
f 930//849 934//853 937//854 935//859
f 942//861 945//869 946//868 944//862
f 932//850 936//858 945//869 942//861
f 953//870 954//871 956//872 955//873
f 957//874 958//875 956//872 954//871
f 962//876 963//877 961//878 960//879
f 966//880 967//881 965//882 964//883
f 970//884 971//885 969//886 968//887
f 964//883 965//882 958//875 957//874
f 968//887 969//886 963//877 962//876
f 955//873 956//872 960//879 959//888
f 958//875 962//876 960//879 956//872
f 967//881 970//884 968//887 965//882
f 965//882 968//887 962//876 958//875
f 974//889 975//890 973//891 972//892
f 978//893 979//894 977//895 976//896
f 982//885 983//885 981//897 980//898
f 986//885 987//885 985//885 984//899
f 980//898 981//897 975//890 974//889
f 984//899 985//885 979//894 978//893
f 975//890 978//893 976//896 973//891
f 983//885 986//885 984//899 981//897
f 981//897 984//899 978//893 975//890
f 915//834 951//900 952//901 916//835
f 953//870 955//873 920//847 919//846
f 925//842 959//888 960//879 926//843
f 960//879 961//878 928//844 926//843
f 916//835 952//901 953//870 919//846
f 955//873 959//888 925//842 920//847
f 972//892 973//891 940//856 938//855
f 976//896 977//895 950//866 948//865
f 973//891 976//896 948//865 940//856
f 923//841 924//840 934//853 933//852
f 927//845 928//844 938//855 937//854
f 924//840 927//845 937//854 934//853
f 963//877 974//889 972//892 961//878
f 971//885 982//885 980//898 969//886
f 969//886 980//898 974//889 963//877
f 961//878 972//892 938//855 928//844
f 988//902 989//903 991//904 990//905
f 988//902 992//906 993//907 989//903
f 997//908 998//909 1000//910 999//911
f 995//912 999//911 1000//910 996//913
f 997//908 999//911 995//912 994//914
f 1005//915 1006//916 1004//917 1003//918
f 1012//919 1013//920 1011//921 1010//922
f 1016//923 1017//924 1015//925 1014//926
f 992//906 1007//927 1008//928 993//907
f 997//908 1009//929 1010//922 998//909
f 1010//922 1011//921 1000//910 998//909
f 1014//926 1015//925 1006//916 1005//915
f 995//912 996//913 1003//918 1002//930
f 1000//910 1005//915 1003//918 996//913
f 1013//920 1016//923 1014//926 1011//921
f 989//903 994//914 995//912 991//904
f 989//903 993//907 997//908 994//914
f 991//904 995//912 1002//930 1001//931
f 993//907 1008//928 1009//929 997//908
f 1011//921 1014//926 1005//915 1000//910
f 1020//932 1021//933 1019//934 1018//935
f 1024//936 1025//885 1023//937 1022//938
f 1028//885 1029//885 1027//899 1026//939
f 1032//940 1033//941 1031//885 1030//885
f 1026//939 1027//899 1021//933 1020//932
f 1030//885 1031//885 1025//885 1024//936
f 1021//933 1024//936 1022//938 1019//934
f 1029//885 1032//940 1030//885 1027//899
f 1027//899 1030//885 1024//936 1021//933
f 1036//942 1037//943 1035//944 1034//945
f 1040//946 1041//885 1039//885 1038//947
f 1044//948 1045//885 1043//949 1042//950
f 1048//951 1049//952 1047//953 1046//885
f 1042//950 1043//949 1037//943 1036//942
f 1046//885 1047//953 1041//885 1040//946
f 1037//943 1040//946 1038//947 1035//944
f 1045//885 1048//951 1046//885 1043//949
f 1043//949 1046//885 1040//946 1037//943
f 1052//954 1053//955 1051//954 1050//885
f 1056//956 1057//957 1055//958 1054//959
f 1060//960 1061//961 1059//962 1058//963
f 1069//964 1070//965 1068//966 1067//967
f 1066//968 1070//965 1069//964 1065//969
f 1068//966 1070//965 1066//968 1064//970
f 1058//963 1059//962 1053//955 1052//954
f 1064//970 1066//968 1057//957 1056//956
f 1053//955 1056//956 1054//959 1051//954
f 1061//961 1068//966 1064//970 1059//962
f 1059//962 1064//970 1056//956 1053//955
f 1034//945 1035//944 1013//920 1012//919
f 1038//947 1039//885 1017//924 1016//923
f 1035//944 1038//947 1016//923 1013//920
f 1050//885 1051//954 1029//885 1028//885
f 1054//959 1055//958 1033//941 1032//940
f 1051//954 1054//959 1032//940 1029//885
f 1006//916 1020//932 1018//935 1004//917
f 1017//924 1028//885 1026//939 1015//925
f 1015//925 1026//939 1020//932 1006//916
f 1041//885 1052//954 1050//885 1039//885
f 1049//952 1060//960 1058//963 1047//953
f 1047//953 1058//963 1052//954 1041//885
f 1039//885 1050//885 1028//885 1017//924
f 1073//885 1074//885 1072//885 1071//971
f 1077//972 1078//973 1076//885 1075//885
f 1081//974 1082//975 1080//976 1079//977
f 1085//978 1086//979 1084//980 1083//981
f 1079//977 1080//976 1074//885 1073//885
f 1083//981 1084//980 1078//973 1077//972
f 1074//885 1077//972 1075//885 1072//885
f 1082//975 1085//978 1083//981 1080//976
f 1080//976 1083//981 1077//972 1074//885
f 1089//982 1090//983 1088//885 1087//885
f 1093//984 1094//985 1092//885 1091//885
f 1097//986 1098//987 1096//988 1095//989
f 1101//990 1103//991 1100//992 1099//993
f 1095//989 1096//988 1090//983 1089//982
f 1099//993 1100//992 1094//985 1093//984
f 1090//983 1093//984 1091//885 1088//885
f 1098//987 1101//990 1099//993 1096//988
f 1096//988 1099//993 1093//984 1090//983
f 1110//994 1111//995 1109//996 1108//997
f 1109//996 1111//995 1107//998 1106//999
f 1114//1000 1115//1001 1113//1002 1112//1003
f 1118//1004 1119//1005 1117//1006 1116//1007
f 1117//1006 1121//1008 1120//1009 1116//1007
f 1120//1009 1122//1010 1118//1004 1116//1007
f 1125//1011 1126//1012 1124//1013 1123//1014
f 1124//1013 1128//1015 1127//1016 1123//1014
f 1105//1017 1126//1012 1125//1011 1104//1018
f 1109//996 1130//1019 1129//1020 1108//997
f 1129//1020 1131//1021 1110//994 1108//997
f 1112//1003 1113//1002 1105//1017 1104//1018
f 1120//1009 1121//1008 1111//995 1110//994
f 1111//995 1121//1008 1117//1006 1107//998
f 1115//1001 1122//1010 1120//1009 1113//1002
f 1126//1012 1131//1021 1129//1020 1124//1013
f 1129//1020 1132//1022 1128//1015 1124//1013
f 1113//1002 1120//1009 1110//994 1105//1017
f 1110//994 1131//1021 1126//1012 1105//1017
f 1135//1023 1136//1024 1134//1025 1133//1026
f 1134//1025 1138//1027 1137//1028 1133//1026
f 1141//1029 1142//1030 1140//1031 1139//1032
f 1146//1033 1147//1034 1145//1035 1144//1036
f 1150//1037 1151//1038 1149//1039 1148//1040
f 1144//1036 1145//1035 1136//1024 1135//1023
f 1148//1040 1149//1039 1142//1030 1141//1029
f 1136//1024 1141//1029 1139//1032 1134//1025
f 1139//1032 1143//1041 1138//1027 1134//1025
f 1147//1034 1150//1037 1148//1040 1145//1035
f 1145//1035 1148//1040 1141//1029 1136//1024
f 1106//999 1107//998 1082//975 1081//974
f 1117//1006 1119//1005 1086//979 1085//978
f 1107//998 1117//1006 1085//978 1082//975
f 1140//1031 1142//1030 1098//987 1097//986
f 1103//991 1151//1038 1150//1037 1102//1042
f 1149//1039 1151//1038 1103//991 1101//990
f 1142//1030 1149//1039 1101//990 1098//987
f 1078//973 1089//982 1087//885 1076//885
f 1086//979 1097//986 1095//989 1084//980
f 1084//980 1095//989 1089//982 1078//973
f 1137//1028 1138//1027 1115//1001 1114//1000
f 1139//1032 1140//1031 1119//1005 1118//1004
f 1122//1010 1143//1041 1139//1032 1118//1004
f 1138//1027 1143//1041 1122//1010 1115//1001
f 1119//1005 1140//1031 1097//986 1086//979
f 869//798 990//905 991//904 870//799
f 878//794 1002//930 1003//918 879//795
f 1003//918 1004//917 881//796 879//795
f 874//789 1001//931 1002//930 878//794
f 991//904 1001//931 874//789 870//799
f 1018//935 1019//934 910//824 909//823
f 1022//938 1023//937 914//826 913//825
f 1019//934 1022//938 913//825 910//824
f 1004//917 1018//935 909//823 881//796
f 1071//971 1072//885 967//881 966//880
f 1075//885 1076//885 971//885 970//884
f 1072//885 1075//885 970//884 967//881
f 1087//885 1088//885 983//885 982//885
f 1091//885 1092//885 987//885 986//885
f 1088//885 1091//885 986//885 983//885
f 1076//885 1087//885 982//885 971//885
f 891//808 892//807 952//901 951//900
f 896//815 897//816 954//871 953//870
f 901//813 957//874 954//871 897//816
f 914//826 966//880 964//883 912//827
f 892//807 896//815 953//870 952//901
f 912//827 964//883 957//874 901//813
f 1025//885 1073//885 1071//971 1023//937
f 1033//941 1081//974 1079//977 1031//885
f 1031//885 1079//977 1073//885 1025//885
f 1127//1016 1128//1015 1063//1043 1062//1044
f 1057//957 1109//996 1106//999 1055//958
f 1129//1020 1130//1019 1066//968 1065//969
f 1069//964 1132//1022 1129//1020 1065//969
f 1128//1015 1132//1022 1069//964 1063//1043
f 1066//968 1130//1019 1109//996 1057//957
f 1055//958 1106//999 1081//974 1033//941
f 1023//937 1071//971 966//880 914//826
f 826//749 827//750 1008//928 1007//927
f 832//751 833//754 1010//922 1009//929
f 836//753 1012//919 1010//922 833//754
f 827//750 832//751 1009//929 1008//928
f 852//766 1036//942 1034//945 849//762
f 868//780 1044//948 1042//950 866//781
f 866//781 1042//950 1036//942 852//766
f 849//762 1034//945 1012//919 836//753
f 1155//1045 1157//1046 1158//1047 1156//1048
f 1152//1049 1155//1045 1156//1048 1153//1050
f 1156//1048 1158//1047 1160//1051 1159//1052
f 1153//1050 1156//1048 1159//1052 1154//1053
f 1162//1054 1164//1055 1165//1056 1163//1057
f 1166//1058 1167//1059 1169//1060 1168//1061
f 1166//1058 1170//1062 1171//1063 1167//1059
f 1171//1063 1172//1064 1169//1060 1167//1059
f 1175//1065 1176//1066 1174//1067 1173//1068
f 1177//1069 1180//1070 1181//1071 1178//1072
f 1181//1071 1182//1073 1179//1074 1178//1072
f 1185//1075 1186//1076 1184//1077 1183//1078
f 1170//1062 1177//1069 1178//1072 1171//1063
f 1178//1072 1179//1074 1172//1064 1171//1063
f 1183//1078 1184//1077 1176//1066 1175//1065
f 1172//1064 1175//1065 1173//1068 1169//1060
f 1182//1073 1185//1075 1183//1078 1179//1074
f 1163//1057 1165//1056 1170//1062 1166//1058
f 1179//1074 1183//1078 1175//1065 1172//1064
f 1187//1079 1189//1080 1190//1081 1188//1082
f 1191//1083 1193//1084 1194//1085 1192//1086
f 1195//1087 1196//1088 1198//1089 1197//1090
f 1195//1087 1199//1091 1200//1092 1196//1088
f 1200//1092 1201//1093 1198//1089 1196//1088
f 1202//1094 1204//1095 1205//1096 1203//1097
f 1189//1080 1197//1090 1198//1089 1190//1081
f 1193//1084 1202//1094 1203//1097 1194//1085
f 1188//1082 1190//1081 1193//1084 1191//1083
f 1198//1089 1201//1093 1204//1095 1202//1094
f 1190//1081 1198//1089 1202//1094 1193//1084
f 1208//1098 1209//1099 1207//1100 1206//1101
f 1212//1102 1213//885 1211//885 1210//1103
f 1216//1104 1217//1105 1215//1106 1214//1107
f 1220//1108 1221//885 1219//885 1218//1109
f 1214//1107 1215//1106 1209//1099 1208//1098
f 1218//1109 1219//885 1213//885 1212//1102
f 1209//1099 1212//1102 1210//1103 1207//1100
f 1217//1105 1220//1108 1218//1109 1215//1106
f 1215//1106 1218//1109 1212//1102 1209//1099
f 1157//1046 1187//1079 1188//1082 1158//1047
f 1160//1051 1191//1083 1192//1086 1161//1110
f 1158//1047 1188//1082 1191//1083 1160//1051
f 1206//1101 1207//1100 1182//1073 1181//1071
f 1210//1103 1211//885 1186//1076 1185//1075
f 1207//1100 1210//1103 1185//1075 1182//1073
f 1152//1049 1153//1050 1165//1056 1164//1055
f 1160//1051 1161//1110 1181//1071 1180//1070
f 1160//1051 1180//1070 1177//1069 1159//1052
f 1153//1050 1154//1053 1170//1062 1165//1056
f 1159//1052 1177//1069 1170//1062 1154//1053
f 1194//1085 1208//1098 1206//1101 1192//1086
f 1205//1096 1216//1104 1214//1107 1203//1097
f 1203//1097 1214//1107 1208//1098 1194//1085
f 1192//1086 1206//1101 1181//1071 1161//1110
f 1222//1111 1225//1112 1226//1113 1223//1114
f 1228//1115 1231//1116 1232//1117 1229//1118
f 1230//1119 1231//1116 1228//1115 1227//1120
f 1238//1121 1239//1122 1237//1123 1236//1124
f 1233//1125 1236//1124 1237//1123 1234//1126
f 1237//1123 1239//1122 1235//1127 1234//1126
f 1241//1128 1243//1129 1244//1130 1242//1131
f 1225//1112 1233//1125 1234//1126 1226//1113
f 1231//1116 1241//1128 1242//1131 1232//1117
f 1240//1132 1241//1128 1231//1116 1230//1119
f 1223//1114 1227//1120 1228//1115 1224//1133
f 1223//1114 1226//1113 1230//1119 1227//1120
f 1235//1127 1241//1128 1240//1132 1234//1126
f 1235//1127 1239//1122 1243//1129 1241//1128
f 1226//1113 1234//1126 1240//1132 1230//1119
f 1247//1134 1248//1135 1246//1136 1245//1137
f 1251//1138 1252//885 1250//885 1249//1139
f 1255//1140 1256//1141 1254//1142 1253//1143
f 1259//1144 1260//885 1258//885 1257//1145
f 1253//1143 1254//1142 1248//1135 1247//1134
f 1257//1145 1258//885 1252//885 1251//1138
f 1248//1135 1251//1138 1249//1139 1246//1136
f 1256//1141 1259//1144 1257//1145 1254//1142
f 1254//1142 1257//1145 1251//1138 1248//1135
f 1261//1146 1263//1147 1264//1148 1262//1149
f 1265//1150 1267//1151 1268//1152 1266//1153
f 1269//1154 1271//1155 1272//1156 1270//1157
f 1273//1158 1275//1159 1276//1160 1274//1161
f 1263//1147 1269//1154 1270//1157 1264//1148
f 1267//1151 1273//1158 1274//1161 1268//1152
f 1262//1149 1264//1148 1267//1151 1265//1150
f 1270//1157 1272//1156 1275//1159 1273//1158
f 1264//1148 1270//1157 1273//1158 1267//1151
f 1279//1162 1280//1163 1278//1164 1277//1165
f 1283//1166 1284//885 1282//885 1281//1167
f 1288//1168 1289//1169 1286//1170 1285//1171
f 1292//1172 1293//1173 1291//885 1290//1174
f 1285//1171 1286//1170 1280//1163 1279//1162
f 1290//1174 1291//885 1284//885 1283//1166
f 1280//1163 1283//1166 1281//1167 1278//1164
f 1289//1169 1292//1172 1290//1174 1286//1170
f 1286//1170 1290//1174 1283//1166 1280//1163
f 1238//1121 1261//1146 1262//1149 1239//1122
f 1243//1129 1265//1150 1266//1153 1244//1130
f 1239//1122 1262//1149 1265//1150 1243//1129
f 1277//1165 1278//1164 1256//1141 1255//1140
f 1281//1167 1282//885 1260//885 1259//1144
f 1278//1164 1281//1167 1259//1144 1256//1141
f 1232//1117 1247//1134 1245//1137 1229//1118
f 1244//1130 1255//1140 1253//1143 1242//1131
f 1242//1131 1253//1143 1247//1134 1232//1117
f 1268//1152 1279//1162 1277//1165 1266//1153
f 1287//1175 1288//1168 1276//1160 1275//1159
f 1276//1160 1288//1168 1285//1171 1274//1161
f 1274//1161 1285//1171 1279//1162 1268//1152
f 1266//1153 1277//1165 1255//1140 1244//1130
f 1199//1091 1222//1111 1223//1114 1200//1092
f 1223//1114 1224//1133 1201//1093 1200//1092
f 1204//1095 1228//1115 1229//1118 1205//1096
f 1201//1093 1224//1133 1228//1115 1204//1095
f 1245//1137 1246//1136 1217//1105 1216//1104
f 1249//1139 1250//885 1221//885 1220//1108
f 1246//1136 1249//1139 1220//1108 1217//1105
f 1229//1118 1245//1137 1216//1104 1205//1096
f 1296//885 1297//885 1295//885 1294//1176
f 1300//1177 1301//1178 1299//1179 1298//1180
f 1304//885 1305//1181 1303//1182 1302//885
f 1308//1183 1309//1184 1307//1185 1306//1186
f 1302//885 1303//1182 1297//885 1296//885
f 1306//1186 1307//1185 1301//1178 1300//1177
f 1297//885 1300//1177 1298//1180 1295//885
f 1305//1181 1308//1183 1306//1186 1303//1182
f 1303//1182 1306//1186 1300//1177 1297//885
f 1314//1187 1317//1188 1316//1189 1313//1190
f 1315//1191 1317//1188 1314//1187 1312//1192
f 1320//1193 1321//1194 1319//1195 1318//1196
f 1319//1195 1323//1197 1322//1198 1318//1196
f 1332//1199 1333//1200 1331//1201 1330//1202
f 1329//1203 1333//1200 1332//1199 1328//1204
f 1336//1205 1337//1206 1335//1207 1334//1208
f 1335//1207 1339//1209 1338//1210 1334//1208
f 1338//1210 1340//1211 1336//1205 1334//1208
f 1311//1212 1329//1203 1328//1204 1310//1213
f 1317//1188 1337//1206 1336//1205 1316//1189
f 1335//1207 1337//1206 1317//1188 1315//1191
f 1322//1198 1323//1197 1311//1212 1310//1213
f 1324//1214 1325//1215 1314//1187 1313//1190
f 1316//1189 1327//1216 1324//1214 1313//1190
f 1321//1194 1326//1217 1324//1214 1319//1195
f 1324//1214 1327//1216 1323//1197 1319//1195
f 1333//1200 1340//1211 1338//1210 1331//1201
f 1336//1205 1340//1211 1333//1200 1329//1203
f 1323//1197 1327//1216 1316//1189 1311//1212
f 1316//1189 1336//1205 1329//1203 1311//1212
f 1343//885 1344//1218 1342//1219 1341//885
f 1347//1220 1349//1221 1346//1222 1345//1223
f 1352//1224 1353//1225 1351//1226 1350//885
f 1356//1227 1359//1228 1358//1229 1355//1230
f 1357//1231 1359//1228 1356//1227 1354//1232
f 1350//885 1351//1226 1344//1218 1343//885
f 1349//1221 1356//1227 1355//1230 1348//1233
f 1354//1232 1356//1227 1349//1221 1347//1220
f 1344//1218 1347//1220 1345//1223 1342//1219
f 1353//1225 1357//1231 1354//1232 1351//1226
f 1351//1226 1354//1232 1347//1220 1344//1218
f 1361//1234 1363//1235 1362//1236 1360//1237
f 1365//1238 1367//1239 1366//1240 1364//1241
f 1369//1242 1371//1243 1370//1244 1368//1245
f 1363//1235 1369//1242 1368//1245 1362//1236
f 1364//1241 1366//1240 1363//1235 1361//1234
f 1372//1246 1373//1247 1371//1243 1369//1242
f 1366//1240 1372//1246 1369//1242 1363//1235
f 1341//885 1342//1219 1305//1181 1304//885
f 1345//1223 1346//1222 1309//1184 1308//1183
f 1342//1219 1345//1223 1308//1183 1305//1181
f 1331//1201 1361//1234 1360//1237 1330//1202
f 1339//1209 1365//1238 1364//1241 1338//1210
f 1338//1210 1364//1241 1361//1234 1331//1201
f 1301//1178 1315//1191 1312//1192 1299//1179
f 1309//1184 1339//1209 1335//1207 1307//1185
f 1307//1185 1335//1207 1315//1191 1301//1178
f 1366//1240 1367//1239 1349//1221 1348//1233
f 1349//1221 1367//1239 1365//1238 1346//1222
f 1358//1229 1373//1247 1372//1246 1355//1230
f 1355//1230 1372//1246 1366//1240 1348//1233
f 1346//1222 1365//1238 1339//1209 1309//1184
f 1376//1248 1377//1249 1375//1250 1374//1251
f 1380//1252 1383//1253 1382//1254 1379//1255
f 1381//1256 1383//1253 1380//1252 1378//1257
f 1386//1258 1387//1259 1385//1260 1384//1261
f 1390//1262 1393//1263 1392//1264 1389//1265
f 1391//1266 1393//1263 1390//1262 1388//1267
f 1384//1261 1385//1260 1377//1249 1376//1248
f 1383//1253 1390//1262 1389//1265 1382//1254
f 1388//1267 1390//1262 1383//1253 1381//1256
f 1377//1249 1381//1256 1378//1257 1375//1250
f 1387//1259 1391//1266 1388//1267 1385//1260
f 1385//1260 1388//1267 1381//1256 1377//1249
f 1395//1268 1397//1269 1396//1270 1394//1271
f 1401//1272 1403//1273 1402//1274 1400//1275
f 1397//1269 1401//1272 1400//1275 1396//1270
f 1398//1276 1399//1277 1397//1269 1395//1268
f 1404//1278 1405//1279 1403//1273 1401//1272
f 1399//1277 1404//1278 1401//1272 1397//1269
f 1408//885 1409//1280 1407//1281 1406//885
f 1412//1282 1415//1283 1414//1284 1411//1285
f 1413//1286 1415//1283 1412//1282 1410//1287
f 1418//885 1419//1288 1417//1289 1416//885
f 1422//1290 1423//1291 1421//1292 1420//1293
f 1416//885 1417//1289 1409//1280 1408//885
f 1420//1293 1421//1292 1415//1283 1413//1286
f 1409//1280 1413//1286 1410//1287 1407//1281
f 1419//1288 1422//1290 1420//1293 1417//1289
f 1417//1289 1420//1293 1413//1286 1409//1280
f 1425//1294 1427//1295 1426//1296 1424//1297
f 1431//1298 1432//1299 1434//1300 1433//1301
f 1434//1300 1437//1302 1436//1303 1433//1301
f 1435//1304 1437//1302 1434//1300 1432//1299
f 1439//1305 1441//1306 1440//1307 1438//1308
f 1427//1295 1432//1299 1431//1298 1426//1296
f 1430//1309 1439//1305 1438//1308 1429//1310
f 1428//1311 1429//1310 1427//1295 1425//1294
f 1435//1304 1440//1307 1442//1312 1437//1302
f 1438//1308 1440//1307 1435//1304 1432//1299
f 1429//1310 1438//1308 1432//1299 1427//1295
f 1406//885 1407//1281 1387//1259 1386//1258
f 1393//1263 1412//1282 1411//1285 1392//1264
f 1410//1287 1412//1282 1393//1263 1391//1266
f 1407//1281 1410//1287 1391//1266 1387//1259
f 1403//1273 1425//1294 1424//1297 1402//1274
f 1405//1279 1428//1311 1425//1294 1403//1273
f 1382//1254 1399//1277 1398//1276 1379//1255
f 1392//1264 1405//1279 1404//1278 1389//1265
f 1389//1265 1404//1278 1399//1277 1382//1254
f 1414//1284 1415//1283 1430//1309 1429//1310
f 1414//1284 1429//1310 1428//1311 1411//1285
f 1423//1291 1441//1306 1439//1305 1421//1292
f 1421//1292 1439//1305 1430//1309 1415//1283
f 1411//1285 1428//1311 1405//1279 1392//1264
f 1374//1251 1375//1250 1353//1225 1352//1224
f 1359//1228 1380//1252 1379//1255 1358//1229
f 1378//1257 1380//1252 1359//1228 1357//1231
f 1375//1250 1378//1257 1357//1231 1353//1225
f 1371//1243 1395//1268 1394//1271 1370//1244
f 1373//1247 1398//1276 1395//1268 1371//1243
f 1379//1255 1398//1276 1373//1247 1358//1229
f 1443//1313 1445//1314 1446//1315 1444//1316
f 1444//1316 1446//1315 1448//1317 1447//1318
f 1451//1319 1454//1320 1455//1321 1452//1322
f 1455//1321 1456//1323 1453//1324 1452//1322
f 1459//1325 1460//1326 1458//1327 1457//1328
f 1461//1329 1463//1330 1464//1331 1462//1332
f 1467//1333 1468//1334 1466//1335 1465//1336
f 1467//1333 1470//1337 1471//1338 1468//1334
f 1469//1339 1470//1337 1467//1333 1465//1336
f 1474//1340 1475//1341 1473//1342 1472//1343
f 1449//1344 1461//1329 1462//1332 1450//1345
f 1454//1320 1465//1336 1466//1335 1455//1321
f 1466//1335 1468//1334 1456//1323 1455//1321
f 1472//1343 1473//1342 1460//1326 1459//1325
f 1456//1323 1459//1325 1457//1328 1453//1324
f 1471//1338 1474//1340 1472//1343 1468//1334
f 1462//1332 1464//1331 1469//1339 1465//1336
f 1450//1345 1462//1332 1465//1336 1454//1320
f 1468//1334 1472//1343 1459//1325 1456//1323
f 1478//1346 1479//1347 1477//1348 1476//1349
f 1478//1346 1480//1350 1481//1351 1479//1347
f 1483//1352 1485//1353 1486//1354 1484//1355
f 1490//1356 1491//1357 1488//1358 1487//1359
f 1495//1360 1497//1361 1498//1362 1496//1363
f 1504//1364 1505//1365 1503//1366 1502//1367
f 1499//1368 1502//1367 1503//1366 1500//1369
f 1503//1366 1505//1365 1501//1370 1500//1369
f 1480//1350 1492//1371 1493//1372 1481//1351
f 1489//1373 1499//1368 1500//1369 1490//1356
f 1500//1369 1501//1370 1491//1357 1490//1356
f 1495//1360 1496//1363 1493//1372 1492//1371
f 1489//1373 1490//1356 1486//1354 1485//1353
f 1486//1354 1490//1356 1487//1359 1484//1355
f 1479//1347 1483//1352 1482//1374 1477//1348
f 1479//1347 1481//1351 1485//1353 1483//1352
f 1496//1363 1498//1362 1502//1367 1499//1368
f 1496//1363 1499//1368 1494//1375 1493//1372
f 1481//1351 1493//1372 1494//1375 1485//1353
f 1494//1375 1499//1368 1489//1373 1485//1353
f 1463//1330 1476//1349 1477//1348 1464//1331
f 1470//1337 1483//1352 1484//1355 1471//1338
f 1482//1374 1483//1352 1470//1337 1469//1339
f 1487//1359 1488//1358 1475//1341 1474//1340
f 1464//1331 1477//1348 1482//1374 1469//1339
f 1484//1355 1487//1359 1474//1340 1471//1338
f 1449//1344 1450//1345 1446//1315 1445//1314
f 1448//1317 1454//1320 1451//1319 1447//1318
f 1450//1345 1454//1320 1448//1317 1446//1315
f 1508//1376 1509//1377 1507//1378 1506//1379
f 1509//1377 1511//1380 1510//1381 1507//1378
f 1497//1361 1506//1379 1507//1378 1498//1362
f 1510//1381 1511//1380 1504//1364 1502//1367
f 1498//1362 1507//1378 1510//1381 1502//1367
f 1514//885 1515//885 1513//1382 1512//885
f 1518//1383 1519//1384 1517//1385 1516//1386
f 1522//1387 1523//885 1521//885 1520//1388
f 1526//1389 1527//1390 1525//1391 1524//1392
f 1520//1388 1521//885 1515//885 1514//885
f 1524//1392 1525//1391 1519//1384 1518//1383
f 1515//885 1518//1383 1516//1386 1513//1382
f 1523//885 1526//1389 1524//1392 1521//885
f 1521//885 1524//1392 1518//1383 1515//885
f 1529//1393 1531//1394 1530//1395 1528//1396
f 1532//1397 1533//1398 1535//1399 1534//1400
f 1535//1399 1538//1401 1537//1402 1534//1400
f 1536//1403 1538//1401 1535//1399 1533//1398
f 1545//1404 1546//1405 1544//1406 1542//1407
f 1549//1408 1550//1409 1552//1410 1551//1411
f 1548//1412 1550//1409 1549//1408 1547//1413
f 1554//1414 1556//1415 1555//1416 1553//1417
f 1538//1401 1544//1406 1543//1418 1537//1402
f 1542//1407 1544//1406 1538//1401 1536//1403
f 1540//1419 1548//1412 1547//1413 1539//1420
f 1530//1395 1531//1394 1540//1419 1539//1420
f 1543//1418 1544//1406 1554//1414 1553//1417
f 1546//1405 1556//1415 1554//1414 1544//1406
f 1534//1400 1537//1402 1531//1394 1529//1393
f 1550//1409 1555//1416 1557//1421 1552//1410
f 1553//1417 1555//1416 1550//1409 1548//1412
f 1531//1394 1537//1402 1541//1422 1540//1419
f 1541//1422 1553//1417 1548//1412 1540//1419
f 1543//1418 1553//1417 1541//1422 1537//1402
f 1560//1423 1561//1424 1559//1425 1558//1426
f 1564//1427 1565//1428 1563//1429 1562//885
f 1570//1430 1571//1431 1569//1432 1568//1433
f 1569//1432 1571//1431 1567//1434 1566//1435
f 1576//1430 1577//1436 1575//1436 1574//1430
f 1575//1436 1577//1436 1573//1437 1572//1437
f 1566//1435 1567//1434 1561//1424 1560//1423
f 1572//1437 1573//1437 1565//1428 1564//1427
f 1561//1424 1564//1427 1562//885 1559//1425
f 1574//1430 1575//1436 1571//1431 1570//1430
f 1571//1431 1575//1436 1572//1437 1567//1434
f 1567//1434 1572//1437 1564//1427 1561//1424
f 1580//1438 1581//1439 1579//1440 1578//1441
f 1583//1442 1585//1443 1584//1444 1582//1445
f 1586//1446 1587//1447 1589//1448 1588//1449
f 1589//1448 1592//1450 1591//1451 1588//1449
f 1590//1452 1592//1450 1589//1448 1587//1447
f 1597//1430 1598//1453 1596//1436 1595//1430
f 1596//1436 1598//1453 1594//1454 1593//1455
f 1604//1456 1605//1457 1603//1458 1602//1459
f 1603//1458 1605//1457 1601//1460 1599//1461
f 1593//1455 1594//1454 1581//1439 1580//1438
f 1592//1450 1601//1460 1600//1462 1591//1451
f 1599//1461 1601//1460 1592//1450 1590//1452
f 1581//1439 1590//1452 1587//1447 1579//1440
f 1602//1459 1603//1458 1598//1453 1597//1430
f 1598//1453 1603//1458 1599//1461 1594//1454
f 1588//1449 1591//1451 1585//1443 1583//1442
f 1594//1454 1599//1461 1590//1452 1581//1439
f 1558//1426 1559//1425 1523//885 1522//1387
f 1562//885 1563//1429 1527//1390 1526//1389
f 1559//1425 1562//885 1526//1389 1523//885
f 1578//1441 1579//1440 1546//1405 1545//1404
f 1552//1410 1583//1442 1582//1445 1551//1411
f 1556//1415 1587//1447 1586//1446 1555//1416
f 1586//1446 1588//1449 1557//1421 1555//1416
f 1557//1421 1588//1449 1583//1442 1552//1410
f 1579//1440 1587//1447 1556//1415 1546//1405
f 1519//1384 1536//1403 1533//1398 1517//1385
f 1527//1390 1545//1404 1542//1407 1525//1391
f 1525//1391 1542//1407 1536//1403 1519//1384
f 1565//1428 1580//1438 1578//1441 1563//1429
f 1595//1430 1596//1436 1577//1436 1576//1430
f 1577//1436 1596//1436 1593//1455 1573//1437
f 1573//1437 1593//1455 1580//1438 1565//1428
f 1563//1429 1578//1441 1545//1404 1527//1390
f 1609//1444 1610//1463 1612//1464 1611//1444
f 1612//1464 1614//1465 1613//1466 1611//1444
f 1616//1467 1619//1468 1618//1469 1615//1470
f 1618//1469 1620//1471 1617//1472 1615//1470
f 1607//1473 1610//1463 1609//1444 1606//1444
f 1610//1463 1615//1470 1617//1472 1612//1464
f 1617//1472 1620//1471 1614//1465 1612//1464
f 1608//1474 1615//1470 1610//1463 1607//1473
f 1623//1475 1624//1476 1622//1477 1621//1478
f 1629//1475 1630//1476 1628//1476 1627//1475
f 1627//1475 1628//1476 1624//1476 1623//1475
f 1624//1476 1626//1479 1625//1480 1622//1477
f 1630//1476 1632//1479 1631//1479 1628//1476
f 1628//1476 1631//1479 1626//1479 1624//1476
f 1635//1475 1636//1476 1634//1476 1633//1475
f 1641//1475 1642//1476 1640//1476 1639//1475
f 1639//1475 1640//1476 1636//1476 1635//1475
f 1636//1476 1638//1479 1637//1479 1634//1476
f 1642//1476 1644//1481 1643//1479 1640//1476
f 1640//1476 1643//1479 1638//1479 1636//1476
f 1633//1475 1634//1476 1630//1476 1629//1475
f 1634//1476 1637//1479 1632//1479 1630//1476
f 1647//1482 1648//1483 1646//1484 1645//1485
f 1648//1483 1650//1486 1649//1487 1646//1484
f 1625//1480 1626//1479 1570//1430 1568//1433
f 1631//1479 1632//1479 1576//1430 1574//1430
f 1626//1479 1631//1479 1574//1430 1570//1430
f 1637//1479 1638//1479 1597//1430 1595//1430
f 1643//1479 1644//1481 1604//1456 1602//1459
f 1638//1479 1643//1479 1602//1459 1597//1430
f 1632//1479 1637//1479 1595//1430 1576//1430
f 1614//1465 1648//1483 1647//1482 1613//1466
f 1649//1487 1650//1486 1620//1471 1618//1469
f 1620//1471 1650//1486 1648//1483 1614//1465
f 1584//1444 1585//1443 1607//1473 1606//1444
f 1600//1462 1601//1460 1616//1467 1615//1470
f 1618//1469 1619//1468 1605//1457 1604//1456
f 1605//1457 1619//1468 1616//1467 1601//1460
f 1585//1443 1591//1451 1608//1474 1607//1473
f 1600//1462 1615//1470 1608//1474 1591//1451
f 1645//1485 1646//1484 1642//1476 1641//1475
f 1646//1484 1649//1487 1644//1481 1642//1476
f 1644//1481 1649//1487 1618//1469 1604//1456
f 1271//1155 1443//1313 1444//1316 1272//1156
f 1272//1156 1444//1316 1447//1318 1275//1159
f 1287//1175 1451//1319 1452//1322 1288//1168
f 1452//1322 1453//1324 1289//1169 1288//1168
f 1457//1328 1458//1327 1293//1173 1292//1172
f 1453//1324 1457//1328 1292//1172 1289//1169
f 1447//1318 1451//1319 1287//1175 1275//1159
f 1512//885 1513//1382 1419//1288 1418//885
f 1516//1386 1517//1385 1423//1291 1422//1290
f 1513//1382 1516//1386 1422//1290 1419//1288
f 1437//1302 1529//1393 1528//1396 1436//1303
f 1441//1306 1533//1398 1532//1397 1440//1307
f 1532//1397 1534//1400 1442//1312 1440//1307
f 1442//1312 1534//1400 1529//1393 1437//1302
f 1517//1385 1533//1398 1441//1306 1423//1291
f 1176//1066 1296//885 1294//1176 1174//1067
f 1186//1076 1304//885 1302//885 1184//1077
f 1184//1077 1302//885 1296//885 1176//1066
f 1213//885 1343//885 1341//885 1211//885
f 1221//885 1352//1224 1350//885 1219//885
f 1219//885 1350//885 1343//885 1213//885
f 1211//885 1341//885 1304//885 1186//1076
f 1252//885 1376//1248 1374//1251 1250//885
f 1260//885 1386//1258 1384//1261 1258//885
f 1258//885 1384//1261 1376//1248 1252//885
f 1284//885 1408//885 1406//885 1282//885
f 1293//1173 1418//885 1416//885 1291//885
f 1291//885 1416//885 1408//885 1284//885
f 1282//885 1406//885 1386//1258 1260//885
f 1250//885 1374//1251 1352//1224 1221//885
f 1460//1326 1514//885 1512//885 1458//1327
f 1475//1341 1522//1387 1520//1388 1473//1342
f 1473//1342 1520//1388 1514//885 1460//1326
f 1491//1357 1560//1423 1558//1426 1488//1358
f 1568//1433 1569//1432 1505//1365 1504//1364
f 1505//1365 1569//1432 1566//1435 1501//1370
f 1501//1370 1566//1435 1560//1423 1491//1357
f 1488//1358 1558//1426 1522//1387 1475//1341
f 1621//1478 1622//1477 1509//1377 1508//1376
f 1622//1477 1625//1480 1511//1380 1509//1377
f 1511//1380 1625//1480 1568//1433 1504//1364
f 1458//1327 1512//885 1418//885 1293//1173
f 857//771 1162//1054 1163//1057 858//772
f 863//774 1168//1061 1169//1060 864//775
f 1166//1058 1168//1061 863//774 862//777
f 1173//1068 1174//1067 868//780 867//779
f 858//772 1163//1057 1166//1058 862//777
f 1169//1060 1173//1068 867//779 864//775
f 1294//1176 1295//885 1045//885 1044//948
f 1298//1180 1299//1179 1049//952 1048//951
f 1295//885 1298//1180 1048//951 1045//885
f 1312//1192 1314//1187 1061//961 1060//960
f 1063//1043 1321//1194 1320//1193 1062//1044
f 1068//966 1325//1215 1324//1214 1067//967
f 1324//1214 1326//1217 1069//964 1067//967
f 1069//964 1326//1217 1321//1194 1063//1043
f 1314//1187 1325//1215 1068//966 1061//961
f 1299//1179 1312//1192 1060//960 1049//952
f 1174//1067 1294//1176 1044//948 868//780
f 1653//1488 1654//1489 1656//1490 1655//1491
f 1651//1492 1652//1493 1656//1490 1654//1489
f 1657//1494 1658//1495 1660//1496 1659//1497
f 1662//1498 1663//1499 1665//1500 1664//1501
f 1666//1502 1667//1503 1669//1504 1668//1505
f 1669//1504 1672//1506 1671//1507 1668//1505
f 1666//1502 1668//1505 1671//1507 1670//1508
f 1655//1491 1656//1490 1663//1499 1662//1498
f 1652//1493 1661//1509 1663//1499 1656//1490
f 1659//1497 1660//1496 1667//1503 1666//1502
f 1651//1492 1657//1494 1659//1497 1652//1493
f 1663//1499 1670//1508 1671//1507 1665//1500
f 1666//1502 1670//1508 1663//1499 1661//1509
f 1652//1493 1659//1497 1666//1502 1661//1509
f 1673//1510 1674//1511 1676//1512 1675//1513
f 1677//1514 1678//1515 1680//1516 1679//1517
f 1682//1518 1683//1519 1685//1520 1684//1521
f 1679//1517 1680//1516 1683//1519 1682//1518
f 1674//1511 1677//1514 1679//1517 1676//1512
f 1676//1512 1679//1517 1682//1518 1681//1522
f 1686//1523 1687//1524 1689//1525 1688//1526
f 1690//1527 1691//1528 1693//1529 1692//1530
f 1694//1531 1695//1532 1697//142 1696//142
f 1698//1533 1699//1534 1701//142 1700//142
f 1688//1526 1689//1525 1695//1532 1694//1531
f 1692//1530 1693//1529 1699//1534 1698//1533
f 1687//1524 1690//1527 1692//1530 1689//1525
f 1695//1532 1698//1533 1700//142 1697//142
f 1689//1525 1692//1530 1698//1533 1695//1532
f 1702//1535 1703//1536 1706//1537 1705//1538
f 1707//1539 1708//1540 1710//1541 1709//1542
f 1707//1539 1709//1542 1712//1543 1711//1544
f 1716//1545 1717//1546 1719//1547 1718//142
f 1720//1548 1721//1549 1723//1550 1722//1551
f 1705//1538 1706//1537 1717//1546 1716//1545
f 1711//1544 1712//1543 1721//1549 1720//1548
f 1703//1536 1704//1552 1708//1540 1707//1539
f 1703//1536 1707//1539 1711//1544 1706//1537
f 1717//1546 1720//1548 1722//1551 1719//1547
f 1708//1540 1713//1553 1714//1554 1710//1541
f 1706//1537 1711//1544 1720//1548 1717//1546
f 1653//1488 1655//1491 1687//1524 1686//1523
f 1662//1498 1664//1501 1691//1528 1690//1527
f 1655//1491 1662//1498 1690//1527 1687//1524
f 1676//1512 1704//1552 1703//1536 1675//1513
f 1673//1510 1675//1513 1703//1536 1702//1535
f 1685//1520 1715//1555 1714//1554 1684//1521
f 1682//1518 1684//1521 1714//1554 1713//1553
f 1682//1518 1713//1553 1708//1540 1681//1522
f 1676//1512 1681//1522 1708//1540 1704//1552
f 1664//1501 1665//1500 1674//1511 1673//1510
f 1671//1507 1672//1506 1678//1515 1677//1514
f 1665//1500 1671//1507 1677//1514 1674//1511
f 1691//1528 1702//1535 1705//1538 1693//1529
f 1699//1534 1716//1545 1718//142 1701//142
f 1693//1529 1705//1538 1716//1545 1699//1534
f 1664//1501 1673//1510 1702//1535 1691//1528
f 1727//1556 1728//1557 1730//1558 1729//1559
f 1725//1560 1728//1557 1727//1556 1724//1561
f 1725//1560 1726//1562 1730//1558 1728//1557
f 1731//1563 1732//1564 1734//1565 1733//1566
f 1734//1565 1736//1567 1735//1568 1733//1566
f 1740//1569 1741//1567 1743//1570 1742//1571
f 1744//1572 1745//1573 1747//1574 1746//1575
f 1748//1576 1749//1577 1751//1578 1750//1579
f 1751//1578 1754//1580 1753//1581 1750//1579
f 1748//1576 1750//1579 1753//1581 1752//1582
f 1727//1556 1729//1559 1745//1573 1744//1572
f 1738//1583 1749//1577 1748//1576 1737//1584
f 1738//1583 1739//1585 1751//1578 1749//1577
f 1743//1570 1756//1586 1755//1587 1742//1571
f 1729//1559 1730//1558 1738//1583 1737//1584
f 1745//1573 1748//1576 1752//1582 1747//1574
f 1735//1568 1736//1567 1741//1567 1740//1569
f 1725//1560 1731//1563 1733//1566 1726//1562
f 1733//1566 1735//1568 1730//1558 1726//1562
f 1738//1583 1740//1569 1742//1571 1739//1585
f 1730//1558 1735//1568 1740//1569 1738//1583
f 1742//1571 1755//1587 1751//1578 1739//1585
f 1729//1559 1737//1584 1748//1576 1745//1573
f 1758//1588 1759//1589 1761//1590 1760//1591
f 1764//1592 1765//1593 1767//1594 1766//1595
f 1763//1596 1765//1593 1764//1592 1762//1597
f 1759//1589 1764//1592 1766//1595 1761//1590
f 1762//1597 1764//1592 1759//1589 1757//1598
f 1753//1581 1754//1580 1759//1589 1758//1588
f 1751//1578 1757//1598 1759//1589 1754//1580
f 1755//1587 1756//1586 1763//1596 1762//1597
f 1751//1578 1755//1587 1762//1597 1757//1598
f 1768//142 1769//142 1771//1599 1770//1600
f 1772//142 1773//142 1775//1601 1774//1602
f 1776//1603 1777//1604 1780//1605 1778//1606
f 1781//1607 1782//1608 1784//1609 1783//1610
f 1770//1600 1771//1599 1777//1604 1776//1603
f 1774//1602 1775//1601 1782//1608 1781//1607
f 1769//142 1772//142 1774//1602 1771//1599
f 1777//1604 1781//1607 1783//1610 1780//1605
f 1771//1599 1774//1602 1781//1607 1777//1604
f 1785//142 1786//142 1788//1611 1787//1612
f 1789//142 1790//639 1792//142 1791//142
f 1793//1613 1794//1614 1796//1615 1795//1616
f 1797//1617 1798//1618 1800//1619 1799//1620
f 1787//1612 1788//1611 1794//1614 1793//1613
f 1791//142 1792//142 1798//1618 1797//1617
f 1786//142 1789//142 1791//142 1788//1611
f 1794//1614 1797//1617 1799//1620 1796//1615
f 1788//1611 1791//142 1797//1617 1794//1614
f 1803//1621 1804//1622 1802//1623 1801//1624
f 1807//1625 1808//1626 1806//1627 1805//1628
f 1811//1629 1812//1630 1810//1631 1809//1632
f 1816//1633 1817//1634 1815//1635 1814//1636
f 1816//1633 1818//1637 1819//1638 1817//1634
f 1809//1632 1810//1631 1804//1622 1803//1621
f 1814//1636 1815//1635 1808//1626 1807//1625
f 1804//1622 1807//1625 1805//1628 1802//1623
f 1812//1630 1816//1633 1814//1636 1810//1631
f 1812//1630 1813//1639 1818//1637 1816//1633
f 1810//1631 1814//1636 1807//1625 1804//1622
f 1822//1640 1823//1641 1821//1642 1820//1643
f 1822//1640 1825//1644 1826//1645 1823//1641
f 1821//1642 1823//1641 1826//1645 1824//1646
f 1829//1647 1830//1648 1828//1649 1827//1650
f 1831//1651 1832//1652 1835//1653 1833//1654
f 1841//1655 1842//1656 1840//1657 1839//1658
f 1846//1659 1847//1660 1845//1661 1844//1662
f 1846//1659 1848//1663 1849//1664 1847//1660
f 1829//1647 1837//1665 1838//1666 1830//1648
f 1833//1654 1839//1658 1840//1657 1834//1667
f 1833//1654 1835//1653 1841//1655 1839//1658
f 1833//1654 1834//1667 1826//1645 1825//1644
f 1822//1640 1831//1651 1833//1654 1825//1644
f 1844//1662 1845//1661 1838//1666 1837//1665
f 1826//1645 1829//1647 1827//1650 1824//1646
f 1842//1656 1846//1659 1844//1662 1840//1657
f 1842//1656 1843//1668 1848//1663 1846//1659
f 1840//1657 1844//1662 1837//1665 1836//1669
f 1826//1645 1836//1669 1837//1665 1829//1647
f 1826//1645 1834//1667 1840//1657 1836//1669
f 1778//1606 1801//1624 1802//1623 1779//1670
f 1778//1606 1780//1605 1803//1621 1801//1624
f 1783//1610 1784//1609 1811//1629 1809//1632
f 1780//1605 1783//1610 1809//1632 1803//1621
f 1795//1616 1796//1615 1822//1640 1820//1643
f 1799//1620 1800//1619 1832//1652 1831//1651
f 1796//1615 1799//1620 1831//1651 1822//1640
f 1773//142 1785//142 1787//1612 1775//1601
f 1782//1608 1793//1613 1795//1616 1784//1609
f 1775//1601 1787//1612 1793//1613 1782//1608
f 1820//1643 1821//1642 1812//1630 1811//1629
f 1812//1630 1821//1642 1824//1646 1813//1639
f 1827//1650 1828//1649 1819//1638 1818//1637
f 1824//1646 1827//1650 1818//1637 1813//1639
f 1784//1609 1795//1616 1820//1643 1811//1629
f 1850//1671 1851//1672 1853//1673 1852//142
f 1854//1674 1855//1675 1857//1676 1856//1677
f 1858//142 1859//142 1861//1678 1860//1679
f 1862//639 1863//1680 1865//649 1864//142
f 1852//142 1853//1673 1859//142 1858//142
f 1856//1677 1857//1676 1863//1680 1862//639
f 1851//1672 1854//1674 1856//1677 1853//1673
f 1859//142 1862//639 1864//142 1861//1678
f 1853//1673 1856//1677 1862//639 1859//142
f 1866//1681 1867//1682 1870//1683 1869//1684
f 1875//1685 1876//1686 1878//1687 1877//1688
f 1874//1689 1876//1686 1875//1685 1873//1690
f 1881//1691 1882//1692 1884//1693 1883//1694
f 1880//1695 1882//1692 1881//1691 1879//1696
f 1885//1697 1886//1698 1888//1699 1887//1700
f 1891//1701 1894//1702 1893//1703 1890//1704
f 1889//1705 1890//1704 1893//1703 1892//1706
f 1869//1684 1870//1683 1886//1698 1885//1697
f 1878//1687 1891//1701 1890//1704 1877//1688
f 1875//1685 1877//1688 1890//1704 1889//1705
f 1884//1693 1896//1707 1895//1708 1883//1694
f 1867//1682 1868//1709 1874//1689 1873//1690
f 1867//1682 1873//1690 1875//1685 1870//1683
f 1886//1698 1889//1705 1892//1706 1888//1699
f 1871//1710 1872//1711 1880//1695 1879//1696
f 1876//1686 1881//1691 1883//1694 1878//1687
f 1879//1696 1881//1691 1876//1686 1874//1689
f 1868//1709 1871//1710 1879//1696 1874//1689
f 1883//1694 1895//1708 1891//1701 1878//1687
f 1870//1683 1875//1685 1889//1705 1886//1698
f 1897//1712 1898//1713 1900//1714 1899//1715
f 1901//1716 1902//142 1904//1618 1903//1717
f 1910//1718 1911//1719 1909//1720 1908//1721
f 1905//1722 1908//1721 1909//1720 1906//1723
f 1905//1722 1907//1724 1910//1718 1908//1721
f 1914//1725 1915//1726 1917//1727 1916//1728
f 1899//1715 1900//1714 1907//1724 1905//1722
f 1903//1717 1904//1618 1915//1726 1914//1725
f 1898//1713 1901//1716 1903//1717 1900//1714
f 1907//1724 1914//1725 1916//1728 1910//1718
f 1900//1714 1903//1717 1914//1725 1907//1724
f 1918//1729 1919//1730 1921//1547 1920//142
f 1922//1731 1923//1732 1925//1733 1924//1734
f 1926//1735 1927//142 1929//142 1928//1736
f 1930//1737 1931//1738 1933//1739 1932//142
f 1920//142 1921//1547 1927//142 1926//1735
f 1924//1734 1925//1733 1931//1738 1930//1737
f 1919//1730 1922//1731 1924//1734 1921//1547
f 1927//142 1930//1737 1932//142 1929//142
f 1921//1547 1924//1734 1930//1737 1927//142
f 1860//1679 1861//1678 1898//1713 1897//1712
f 1864//142 1865//649 1902//142 1901//1716
f 1861//1678 1864//142 1901//1716 1898//1713
f 1887//1700 1888//1699 1919//1730 1918//1729
f 1892//1706 1893//1703 1923//1732 1922//1731
f 1888//1699 1892//1706 1922//1731 1919//1730
f 1855//1675 1866//1681 1869//1684 1857//1676
f 1863//1680 1885//1697 1887//1700 1865//649
f 1857//1676 1869//1684 1885//1697 1863//1680
f 1902//142 1918//1729 1920//142 1904//1618
f 1915//1726 1926//1735 1928//1736 1917//1727
f 1904//1618 1920//142 1926//1735 1915//1726
f 1865//649 1887//1700 1918//1729 1902//142
f 1696//142 1697//142 1769//142 1768//142
f 1700//142 1701//142 1773//142 1772//142
f 1697//142 1700//142 1772//142 1769//142
f 1718//142 1719//1547 1786//142 1785//142
f 1722//1551 1723//1550 1790//639 1789//142
f 1719//1547 1722//1551 1789//142 1786//142
f 1701//142 1718//142 1785//142 1773//142
f 1746//1575 1747//1574 1851//1672 1850//1671
f 1752//1582 1753//1581 1855//1675 1854//1674
f 1747//1574 1752//1582 1854//1674 1851//1672
f 1761//1590 1868//1709 1867//1682 1760//1591
f 1758//1588 1760//1591 1867//1682 1866//1681
f 1767//1594 1872//1711 1871//1710 1766//1595
f 1766//1595 1871//1710 1868//1709 1761//1590
f 1753//1581 1758//1588 1866//1681 1855//1675
f 1709//1542 1710//1541 1725//1560 1724//1561
f 1709//1542 1724//1561 1727//1556 1712//1543
f 1721//1549 1744//1572 1746//1575 1723//1550
f 1714//1554 1715//1555 1732//1564 1731//1563
f 1710//1541 1714//1554 1731//1563 1725//1560
f 1712//1543 1727//1556 1744//1572 1721//1549
f 1790//639 1850//1671 1852//142 1792//142
f 1798//1618 1858//142 1860//1679 1800//1619
f 1792//142 1852//142 1858//142 1798//1618
f 1832//1652 1897//1712 1899//1715 1835//1653
f 1905//1722 1906//1723 1842//1656 1841//1655
f 1842//1656 1906//1723 1909//1720 1843//1668
f 1912//1740 1913//1741 1849//1664 1848//1663
f 1909//1720 1912//1740 1848//1663 1843//1668
f 1835//1653 1899//1715 1905//1722 1841//1655
f 1800//1619 1860//1679 1897//1712 1832//1652
f 1723//1550 1746//1575 1850//1671 1790//639
f 1940//1742 1941//1743 1943//1744 1942//1745
f 1939//1746 1941//1743 1940//1742 1938//1747
f 1936//1748 1940//1742 1942//1745 1937//1749
f 1938//1747 1940//1742 1936//1748 1934//1750
f 1944//1751 1945//1752 1947//1753 1946//1754
f 1947//1753 1950//1755 1949//1756 1946//1754
f 1944//1751 1946//1754 1949//1756 1948//1757
f 1952//1758 1954//1759 1953//1760 1951//1761
f 1958//1762 1959//1763 1962//1764 1961//1765
f 1964//1766 1966//1767 1965//1768 1963//1769
f 1970//1770 1971//1771 1973//1772 1972//1773
f 1969//1774 1971//1771 1970//1770 1968//1775
f 1950//1755 1960//1776 1959//1763 1949//1756
f 1948//1757 1949//1756 1959//1763 1958//1762
f 1957//1774 1969//1774 1968//1775 1956//1777
f 1959//1763 1960//1776 1964//1766 1963//1769
f 1959//1763 1963//1769 1965//1768 1962//1764
f 1953//1760 1954//1759 1957//1774 1956//1777
f 1951//1761 1953//1760 1950//1755 1947//1753
f 1966//1767 1970//1770 1972//1773 1967//1778
f 1968//1775 1970//1770 1966//1767 1964//1766
f 1950//1755 1953//1760 1956//1777 1955//1779
f 1956//1777 1968//1775 1964//1766 1955//1779
f 1950//1755 1955//1779 1964//1766 1960//1776
f 1936//1748 1945//1752 1944//1751 1935//1780
f 1936//1748 1937//1749 1947//1753 1945//1752
f 1943//1744 1952//1758 1951//1761 1942//1745
f 1942//1745 1951//1761 1947//1753 1937//1749
f 1893//1703 1894//1702 1936//1748 1935//1780
f 1891//1701 1934//1750 1936//1748 1894//1702
f 1895//1708 1896//1707 1939//1746 1938//1747
f 1891//1701 1895//1708 1938//1747 1934//1750
f 1923//1732 1944//1751 1948//1757 1925//1733
f 1931//1738 1958//1762 1961//1765 1933//1739
f 1925//1733 1948//1757 1958//1762 1931//1738
f 1893//1703 1935//1780 1944//1751 1923//1732
f 1975//1781 1977//1782 1978//1783 1976//1784
f 1981//1785 1982//1786 1980//1787 1979//1788
f 1981//1785 1983//1789 1984//1790 1982//1786
f 1985//1791 1986//1792 1989//1793 1987//1794
f 1994//1795 1995//1796 1993//1797 1992//1798
f 1994//1795 1997//1799 1998//1800 1995//1796
f 1993//1797 1995//1796 1998//1800 1996//1801
f 1999//1802 2001//1803 2002//1804 2000//1805
f 1987//1794 1992//1798 1993//1797 1988//1806
f 1987//1794 1989//1793 1994//1795 1992//1798
f 1990//1807 1999//1802 2000//1805 1991//1808
f 1987//1794 1988//1806 1978//1783 1977//1782
f 1975//1781 1985//1791 1987//1794 1977//1782
f 1990//1807 1991//1808 1984//1790 1983//1789
f 1976//1784 1981//1785 1979//1788 1974//1809
f 1976//1784 1978//1783 1983//1789 1981//1785
f 1998//1800 2003//1810 2001//1803 1996//1801
f 1993//1797 1996//1801 2001//1803 1999//1802
f 1988//1806 1990//1807 1983//1789 1978//1783
f 1988//1806 1993//1797 1999//1802 1990//1807
f 2004//1811 2005//1812 2007//1813 2006//1814
f 2008//142 2009//1673 2011//142 2010//142
f 2012//1815 2013//1816 2015//1817 2014//1818
f 2016//1819 2017//142 2019//142 2018//1820
f 2006//1814 2007//1813 2013//1816 2012//1815
f 2010//142 2011//142 2017//142 2016//1819
f 2005//1812 2008//142 2010//142 2007//1813
f 2013//1816 2016//1819 2018//1820 2015//1817
f 2007//1813 2010//142 2016//1819 2013//1816
f 2020//1821 2022//1822 2023//1823 2021//1824
f 2026//1825 2027//1826 2025//1827 2024//1828
f 2026//1825 2028//1829 2029//1830 2027//1826
f 2032//1831 2034//1832 2035//1833 2033//1834
f 2028//1829 2032//1831 2033//1834 2029//1830
f 2021//1824 2023//1823 2028//1829 2026//1825
f 2030//1835 2031//1836 2034//1832 2032//1831
f 2023//1823 2030//1835 2032//1831 2028//1829
f 2036//1837 2037//1838 2040//1839 2038//1840
f 2041//1841 2042//142 2044//142 2043//1842
f 2045//1843 2048//1844 2049//1845 2046//1846
f 2045//1843 2047//1847 2050//1848 2048//1844
f 2051//1849 2052//1850 2054//1851 2053//1852
f 2038//1840 2045//1843 2046//1846 2039//1853
f 2038//1840 2040//1839 2047//1847 2045//1843
f 2043//1842 2044//142 2052//1850 2051//1849
f 2037//1838 2041//1841 2043//1842 2040//1839
f 2047//1847 2051//1849 2053//1852 2050//1848
f 2040//1839 2043//1842 2051//1849 2047//1847
f 1997//1799 2020//1821 2021//1824 1998//1800
f 2001//1803 2024//1828 2025//1827 2002//1804
f 2001//1803 2003//1810 2026//1825 2024//1828
f 1998//1800 2021//1824 2026//1825 2003//1810
f 2014//1818 2015//1817 2037//1838 2036//1837
f 2018//1820 2019//142 2042//142 2041//1841
f 2015//1817 2018//1820 2041//1841 2037//1838
f 1986//1792 2004//1811 2006//1814 1989//1793
f 1994//1795 2012//1815 2014//1818 1997//1799
f 1989//1793 2006//1814 2012//1815 1994//1795
f 2038//1840 2039//1853 2023//1823 2022//1822
f 2020//1821 2036//1837 2038//1840 2022//1822
f 2030//1835 2046//1846 2049//1845 2031//1836
f 2023//1823 2039//1853 2046//1846 2030//1835
f 1997//1799 2014//1818 2036//1837 2020//1821
f 2057//1854 2059//1855 2060//1856 2058//1857
f 2063//1858 2065//1859 2066//1860 2064//1861
f 2059//1855 2063//1858 2064//1861 2060//1856
f 2055//1862 2056//1863 2059//1855 2057//1854
f 2061//1864 2062//1865 2065//1859 2063//1858
f 2056//1863 2061//1864 2063//1858 2059//1855
f 2067//1866 2070//1867 2071//1868 2068//1869
f 2067//1866 2069//1870 2072//1871 2070//1867
f 2073//1872 2074//1873 2076//1874 2075//1875
f 2077//1876 2080//1877 2081//1878 2078//1879
f 2077//1876 2079//1880 2082//1881 2080//1877
f 2083//1882 2084//1883 2086//155 2085//1884
f 2070//1867 2077//1876 2078//1879 2071//1868
f 2070//1867 2072//1871 2079//1880 2077//1876
f 2075//1875 2076//1874 2084//1883 2083//1882
f 2069//1870 2073//1872 2075//1875 2072//1871
f 2079//1880 2083//1882 2085//1884 2082//1881
f 2072//1871 2075//1875 2083//1882 2079//1880
f 2090//1885 2092//1886 2093//1887 2091//1888
f 2094//1889 2097//1890 2098//1891 2095//1892
f 2099//1893 2100//1894 2102//1895 2101//1896
f 2099//1893 2103//1897 2104//1898 2100//1894
f 2099//1893 2101//1896 2105//1899 2103//1897
f 2088//1900 2094//1889 2095//1892 2089//1901
f 2092//1886 2101//1896 2102//1895 2093//1887
f 2087//1902 2089//1901 2092//1886 2090//1885
f 2096//1903 2103//1897 2105//1899 2098//1891
f 2095//1892 2098//1891 2105//1899 2101//1896
f 2089//1901 2095//1892 2101//1896 2092//1886
f 2106//1904 2109//1905 2110//1906 2107//1907
f 2106//1904 2108//1908 2111//1909 2109//1905
f 2112//1910 2113//142 2115//142 2114//1911
f 2116//1912 2117//1913 2119//1914 2118//1915
f 2120//1916 2121//142 2123//142 2122//1917
f 2109//1905 2111//1909 2117//1913 2116//1912
f 2114//1911 2115//142 2121//142 2120//1916
f 2108//1908 2112//1910 2114//1911 2111//1909
f 2117//1913 2120//1916 2122//1917 2119//1914
f 2111//1909 2114//1911 2120//1916 2117//1913
f 2065//1859 2090//1885 2091//1888 2066//1860
f 2062//1865 2087//1902 2090//1885 2065//1859
f 2080//1877 2106//1904 2107//1907 2081//1878
f 2080//1877 2082//1881 2108//1908 2106//1904
f 2085//1884 2086//155 2113//142 2112//1910
f 2082//1881 2085//1884 2112//1910 2108//1908
f 2055//1862 2068//1869 2071//1868 2056//1863
f 2061//1864 2078//1879 2081//1878 2062//1865
f 2056//1863 2071//1868 2078//1879 2061//1864
f 2088//1900 2089//1901 2110//1906 2109//1905
f 2087//1902 2107//1907 2110//1906 2089//1901
f 2094//1889 2116//1912 2118//1915 2097//1890
f 2088//1900 2109//1905 2116//1912 2094//1889
f 2062//1865 2081//1878 2107//1907 2087//1902
f 2034//1832 2057//1854 2058//1857 2035//1833
f 2031//1836 2055//1862 2057//1854 2034//1832
f 2048//1844 2067//1866 2068//1869 2049//1845
f 2048//1844 2050//1848 2069//1870 2067//1866
f 2053//1852 2054//1851 2074//1873 2073//1872
f 2050//1848 2053//1852 2073//1872 2069//1870
f 2031//1836 2049//1845 2068//1869 2055//1862
f 2124//1918 2125//1919 2127//1920 2126//1921
f 2128//1922 2129//1923 2131//1924 2130//1925
f 2131//1924 2134//1926 2133//1927 2130//1925
f 2128//1922 2130//1925 2133//1927 2132//1928
f 2136//1929 2138//1930 2137//1931 2135//1932
f 2139//1933 2140//1934 2142//1935 2141//1936
f 2145//1937 2148//1938 2147//1939 2144//1940
f 2143//1941 2144//1940 2147//1939 2146//1942
f 2126//1921 2127//1920 2140//1934 2139//1933
f 2134//1926 2145//1937 2144//1940 2133//1927
f 2132//1928 2133//1927 2144//1940 2143//1941
f 2125//1919 2128//1922 2132//1928 2127//1920
f 2140//1934 2143//1941 2146//1942 2142//1935
f 2135//1932 2137//1931 2134//1926 2131//1924
f 2127//1920 2132//1928 2143//1941 2140//1934
f 2156//1943 2158//1944 2157//1945 2155//1946
f 2151//1947 2156//1943 2155//1946 2150//1948
f 2155//1946 2157//1945 2154//1949 2152//1950
f 2150//1948 2155//1946 2152//1950 2149//1951
f 2159//142 2160//1952 2162//1953 2161//142
f 2163//1954 2164//1955 2166//1956 2165//1957
f 2167//142 2168//1958 2170//1959 2169//142
f 2171//1960 2172//1961 2174//1962 2173//1963
f 2161//142 2162//1953 2168//1958 2167//142
f 2165//1957 2166//1956 2172//1961 2171//1960
f 2160//1952 2163//1954 2165//1957 2162//1953
f 2168//1958 2171//1960 2173//1963 2170//1959
f 2162//1953 2165//1957 2171//1960 2168//1958
f 2176//1964 2178//1965 2177//1966 2175//1967
f 2180//1968 2182//1969 2181//1970 2179//1971
f 2184//1972 2186//1973 2185//1974 2183//1975
f 2189//1976 2190//1977 2192//1978 2191//1979
f 2188//1980 2190//1977 2189//1976 2187//1981
f 2178//1965 2184//1972 2183//1975 2177//1966
f 2182//1969 2188//1980 2187//1981 2181//1970
f 2179//1971 2181//1970 2178//1965 2176//1964
f 2187//1981 2189//1976 2186//1973 2184//1972
f 2181//1970 2187//1981 2184//1972 2178//1965
f 2141//1936 2142//1935 2160//1952 2159//142
f 2146//1942 2147//1939 2164//1955 2163//1954
f 2142//1935 2146//1942 2163//1954 2160//1952
f 2154//1949 2176//1964 2175//1967 2153//1982
f 2158//1944 2180//1968 2179//1971 2157//1945
f 2157//1945 2179//1971 2176//1964 2154//1949
f 2147//1939 2148//1938 2154//1949 2153//1982
f 2145//1937 2152//1950 2154//1949 2148//1938
f 2137//1931 2138//1930 2151//1947 2150//1948
f 2134//1926 2137//1931 2150//1948 2149//1951
f 2134//1926 2149//1951 2152//1950 2145//1937
f 2164//1955 2175//1967 2177//1966 2166//1956
f 2172//1961 2183//1975 2185//1974 2174//1962
f 2166//1956 2177//1966 2183//1975 2172//1961
f 2147//1939 2153//1982 2175//1967 2164//1955
f 2193//142 2194//1983 2196//1984 2195//142
f 2197//1985 2198//1986 2200//1987 2199//1988
f 2201//142 2202//1989 2204//1990 2203//142
f 2205//1991 2206//1992 2208//1993 2207//1994
f 2195//142 2196//1984 2202//1989 2201//142
f 2199//1988 2200//1987 2206//1992 2205//1991
f 2194//1983 2197//1985 2199//1988 2196//1984
f 2202//1989 2205//1991 2207//1994 2204//1990
f 2196//1984 2199//1988 2205//1991 2202//1989
f 2210//1995 2213//1996 2212//1997 2209//1998
f 2210//1995 2211//1999 2214//2000 2213//1996
f 2217//2001 2219//2002 2218//2003 2216//2004
f 2221//2005 2224//2006 2223//2007 2220//2008
f 2230//2009 2231//2010 2229//2011 2228//2012
f 2227//2013 2231//2010 2230//2009 2226//2014
f 2225//2015 2226//2014 2230//2009 2228//2012
f 2213//1996 2221//2005 2220//2008 2212//1997
f 2213//1996 2214//2000 2222//2016 2221//2005
f 2219//2002 2227//2013 2226//2014 2218//2003
f 2210//1995 2215//2017 2216//2004 2211//1999
f 2216//2004 2218//2003 2214//2000 2211//1999
f 2222//2016 2226//2014 2225//2015 2221//2005
f 2225//2015 2228//2012 2224//2006 2221//2005
f 2218//2003 2226//2014 2222//2016 2214//2000
f 2232//142 2233//2018 2235//2019 2234//142
f 2236//2020 2237//2021 2239//2022 2238//2023
f 2240//209 2241//2024 2243//2025 2242//2026
f 2246//2027 2249//2028 2248//2029 2245//2030
f 2244//2031 2245//2030 2248//2029 2247//2032
f 2234//142 2235//2019 2241//2024 2240//209
f 2238//2023 2239//2022 2245//2030 2244//2031
f 2233//2018 2236//2020 2238//2023 2235//2019
f 2241//2024 2244//2031 2247//2032 2243//2025
f 2235//2019 2238//2023 2244//2031 2241//2024
f 2251//2033 2253//2034 2252//2035 2250//2036
f 2255//2037 2257//2038 2256//2039 2254//2040
f 2262//2041 2264//2042 2263//2043 2261//2044
f 2253//2034 2259//2045 2258//2046 2252//2035
f 2257//2038 2262//2041 2261//2044 2256//2039
f 2254//2040 2256//2039 2253//2034 2251//2033
f 2261//2044 2263//2043 2260//2047 2259//2045
f 2256//2039 2261//2044 2259//2045 2253//2034
f 2203//142 2204//1990 2233//2018 2232//142
f 2207//1994 2208//1993 2237//2021 2236//2020
f 2204//1990 2207//1994 2236//2020 2233//2018
f 2224//2006 2251//2033 2250//2036 2223//2007
f 2229//2011 2255//2037 2254//2040 2228//2012
f 2228//2012 2254//2040 2251//2033 2224//2006
f 2198//1986 2209//1998 2212//1997 2200//1987
f 2206//1992 2220//2008 2223//2007 2208//1993
f 2200//1987 2212//1997 2220//2008 2206//1992
f 2237//2021 2250//2036 2252//2035 2239//2022
f 2258//2046 2259//2045 2246//2027 2245//2030
f 2246//2027 2259//2045 2260//2047 2249//2028
f 2239//2022 2252//2035 2258//2046 2245//2030
f 2208//1993 2223//2007 2250//2036 2237//2021
f 2169//142 2170//1959 2194//1983 2193//142
f 2173//1963 2174//1962 2198//1986 2197//1985
f 2170//1959 2173//1963 2197//1985 2194//1983
f 2186//1973 2210//1995 2209//1998 2185//1974
f 2192//1978 2217//2001 2216//2004 2191//1979
f 2189//1976 2191//1979 2216//2004 2215//2017
f 2189//1976 2215//2017 2210//1995 2186//1973
f 2174//1962 2185//1974 2209//1998 2198//1986
f 2268//2048 2270//2049 2271//2050 2269//2051
f 2272//2052 2274//2053 2275//2054 2273//2055
f 2266//2056 2272//2052 2273//2055 2267//2057
f 2269//2051 2271//2050 2274//2053 2272//2052
f 2265//2058 2269//2051 2272//2052 2266//2056
f 2279//2059 2280//2060 2282//2061 2281//2062
f 2279//2059 2283//2063 2284//2064 2280//2060
f 2279//2059 2281//2062 2285//2065 2283//2063
f 2286//2066 2288//2067 2289//2068 2287//2069
f 2290//2070 2293//2071 2294//2072 2291//2073
f 2297//2074 2298//2075 2300//2076 2299//2077
f 2295//2078 2299//2077 2300//2076 2296//2079
f 2301//2080 2303//2081 2305//2082 2304//2083
f 2277//2084 2295//2078 2296//2079 2278//2085
f 2283//2063 2301//2080 2302//2086 2284//2064
f 2283//2063 2285//2065 2303//2081 2301//2080
f 2290//2070 2291//2073 2302//2086 2301//2080
f 2290//2070 2301//2080 2304//2083 2293//2071
f 2277//2084 2278//2085 2289//2068 2288//2067
f 2280//2060 2284//2064 2288//2067 2286//2066
f 2292//2087 2297//2074 2299//2077 2294//2072
f 2291//2073 2294//2072 2299//2077 2295//2078
f 2276//2088 2277//2084 2288//2067 2284//2064
f 2276//2088 2291//2073 2295//2078 2277//2084
f 2276//2088 2284//2064 2302//2086 2291//2073
f 2306//2089 2307//2090 2309//2091 2308//2092
f 2310//2093 2311//142 2313//142 2312//142
f 2314//2094 2315//2095 2317//143 2316//2096
f 2318//142 2319//2097 2321//2098 2320//142
f 2308//2092 2309//2091 2315//2095 2314//2094
f 2312//142 2313//142 2319//2097 2318//142
f 2307//2090 2310//2093 2312//142 2309//2091
f 2315//2095 2318//142 2320//142 2317//143
f 2309//2091 2312//142 2318//142 2315//2095
f 2322//2099 2323//2100 2325//2101 2324//2102
f 2322//2099 2326//2103 2327//2104 2323//2100
f 2322//2099 2324//2102 2328//2105 2326//2103
f 2329//2106 2331//2107 2332//2108 2330//2108
f 2333//2109 2334//2110 2336//2111 2335//2112
f 2342//2113 2343//2114 2341//2115 2340//2116
f 2337//2117 2339//2118 2342//2113 2340//2116
f 2346//2119 2347//733 2345//2120 2344//2121
f 2352//2122 2353//2123 2351//2123 2350//2124
f 2348//2125 2349//2126 2352//2122 2350//2124
f 2356//2119 2357//733 2355//733 2354//2119
f 2326//2103 2337//2117 2338//2127 2327//2104
f 2326//2103 2328//2105 2339//2118 2337//2117
f 2335//2112 2336//2111 2349//2126 2348//2125
f 2324//2102 2333//2109 2335//2112 2328//2105
f 2350//2124 2351//2123 2343//2114 2342//2113
f 2339//2118 2348//2125 2350//2124 2342//2113
f 2354//2119 2355//733 2347//733 2346//2119
f 2323//2100 2327//2104 2331//2107 2329//2106
f 2343//2114 2346//2119 2344//2121 2341//2115
f 2353//2123 2356//2119 2354//2119 2351//2123
f 2351//2123 2354//2119 2346//2119 2343//2114
f 2328//2105 2335//2112 2348//2125 2339//2118
f 2358//2128 2359//2129 2361//2130 2360//2131
f 2362//2129 2363//2132 2365//2133 2364//2130
f 2370//2122 2371//2123 2369//2123 2368//2122
f 2366//2134 2367//2134 2370//2122 2368//2122
f 2374//2119 2375//733 2373//733 2372//2119
f 2380//2135 2381//2136 2379//2123 2378//2122
f 2376//2134 2377//2137 2380//2135 2378//2122
f 2384//2119 2385//733 2383//733 2382//2119
f 2360//2131 2361//2130 2367//2134 2366//2134
f 2364//2130 2365//2133 2377//2137 2376//2134
f 2359//2129 2362//2129 2364//2130 2361//2130
f 2378//2122 2379//2123 2371//2123 2370//2122
f 2367//2134 2376//2134 2378//2122 2370//2122
f 2382//2119 2383//733 2375//733 2374//2119
f 2371//2123 2374//2119 2372//2119 2369//2123
f 2381//2136 2384//2119 2382//2119 2379//2123
f 2379//2123 2382//2119 2374//2119 2371//2123
f 2361//2130 2364//2130 2376//2134 2367//2134
f 2293//2071 2324//2102 2325//2101 2294//2072
f 2292//2087 2294//2072 2325//2101 2323//2100
f 2297//2074 2329//2106 2330//2108 2298//2075
f 2304//2083 2305//2082 2334//2110 2333//2109
f 2292//2087 2323//2100 2329//2106 2297//2074
f 2293//2071 2304//2083 2333//2109 2324//2102
f 2316//2096 2317//143 2359//2129 2358//2128
f 2320//142 2321//2098 2363//2132 2362//2129
f 2317//143 2320//142 2362//2129 2359//2129
f 2281//2062 2306//2089 2308//2092 2285//2065
f 2303//2081 2314//2094 2316//2096 2305//2082
f 2285//2065 2308//2092 2314//2094 2303//2081
f 2334//2110 2358//2128 2360//2131 2336//2111
f 2368//2122 2369//2123 2353//2123 2352//2122
f 2349//2126 2366//2134 2368//2122 2352//2122
f 2372//2119 2373//733 2357//733 2356//2119
f 2369//2123 2372//2119 2356//2119 2353//2123
f 2336//2111 2360//2131 2366//2134 2349//2126
f 2305//2082 2316//2096 2358//2128 2334//2110
f 2268//2048 2269//2051 2338//2127 2337//2117
f 2340//2116 2341//2115 2271//2050 2270//2049
f 2268//2048 2337//2117 2340//2116 2270//2049
f 2266//2056 2267//2057 2332//2108 2331//2107
f 2344//2121 2345//2120 2275//2054 2274//2053
f 2265//2058 2266//2056 2331//2107 2327//2104
f 2341//2115 2344//2121 2274//2053 2271//2050
f 2265//2058 2327//2104 2338//2127 2269//2051
f 2386//2138 2387//2139 2389//2140 2388//2141
f 2392//2142 2395//2143 2394//2144 2391//2145
f 2390//2146 2391//2145 2394//2144 2393//2147
f 2397//2148 2399//2149 2398//2150 2396//2151
f 2400//2152 2401//2153 2403//2154 2402//2155
f 2406//2156 2407//2157 2405//2158 2404//2159
f 2405//2158 2409//2160 2408//2161 2404//2159
f 2405//2158 2407//2157 2410//2162 2409//2160
f 2415//2163 2416//2164 2414//2165 2413//2166
f 2412//2167 2416//2164 2415//2163 2411//2168
f 2388//2141 2389//2140 2401//2153 2400//2152
f 2395//2143 2407//2157 2406//2156 2394//2144
f 2393//2147 2394//2144 2406//2156 2404//2159
f 2399//2149 2412//2167 2411//2168 2398//2150
f 2387//2139 2390//2146 2393//2147 2389//2140
f 2401//2153 2404//2159 2408//2161 2403//2154
f 2396//2151 2398//2150 2395//2143 2392//2142
f 2410//2162 2415//2163 2413//2166 2409//2160
f 2411//2168 2415//2163 2410//2162 2407//2157
f 2398//2150 2411//2168 2407//2157 2395//2143
f 2389//2140 2393//2147 2404//2159 2401//2153
f 2420//2169 2421//2170 2423//2171 2422//2172
f 2426//2173 2428//2174 2427//2175 2425//2176
f 2430//2177 2432//2178 2431//2179 2429//2180
f 2438//2181 2439//2182 2437//2183 2436//2184
f 2435//2185 2439//2182 2438//2181 2434//2186
f 2433//2187 2434//2186 2438//2181 2436//2184
f 2444//2188 2445//2189 2443//2190 2442//2191
f 2441//2192 2445//2189 2444//2188 2440//2193
f 2424//2194 2435//2185 2434//2186 2423//2171
f 2422//2172 2423//2171 2434//2186 2433//2187
f 2432//2178 2448//2195 2447//2196 2431//2179
f 2427//2175 2428//2174 2424//2194 2423//2171
f 2421//2170 2425//2176 2427//2175 2423//2171
f 2447//2196 2448//2195 2441//2192 2440//2193
f 2429//2180 2431//2179 2428//2174 2426//2173
f 2439//2182 2444//2188 2442//2191 2437//2183
f 2440//2193 2444//2188 2439//2182 2435//2185
f 2446//2197 2447//2196 2440//2193 2435//2185
f 2431//2179 2447//2196 2446//2197 2428//2174
f 2424//2194 2428//2174 2446//2197 2435//2185
f 2402//2155 2403//2154 2421//2170 2420//2169
f 2409//2160 2426//2173 2425//2176 2408//2161
f 2414//2165 2430//2177 2429//2180 2413//2166
f 2413//2166 2429//2180 2426//2173 2409//2160
f 2403//2154 2408//2161 2425//2176 2421//2170
f 2418//2198 2419//2199 2397//2148 2396//2151
f 2417//2200 2418//2198 2396//2151 2392//2142
f 2097//1890 2281//2062 2282//2061 2098//1891
f 2096//1903 2098//1891 2282//2061 2280//2060
f 2103//1897 2286//2066 2287//2069 2104//1898
f 2096//1903 2280//2060 2286//2066 2103//1897
f 2118//1915 2119//1914 2307//2090 2306//2089
f 2122//1917 2123//142 2311//142 2310//2093
f 2119//1914 2122//1917 2310//2093 2307//2090
f 2097//1890 2118//1915 2306//2089 2281//2062
f 2242//2026 2243//2025 2387//2139 2386//2138
f 2249//2028 2392//2142 2391//2145 2248//2029
f 2247//2032 2248//2029 2391//2145 2390//2146
f 2243//2025 2247//2032 2390//2146 2387//2139
f 2264//2042 2419//2199 2418//2198 2263//2043
f 2263//2043 2418//2198 2417//2200 2260//2047
f 2249//2028 2260//2047 2417//2200 2392//2142
f 2009//1673 2124//1918 2126//1921 2011//142
f 2017//142 2139//1933 2141//1936 2019//142
f 2011//142 2126//1921 2139//1933 2017//142
f 2042//142 2159//142 2161//142 2044//142
f 2052//1850 2167//142 2169//142 2054//1851
f 2044//142 2161//142 2167//142 2052//1850
f 2019//142 2141//1936 2159//142 2042//142
f 2074//1873 2193//142 2195//142 2076//1874
f 2084//1883 2201//142 2203//142 2086//155
f 2076//1874 2195//142 2201//142 2084//1883
f 2113//142 2232//142 2234//142 2115//142
f 2121//142 2240//209 2242//2026 2123//142
f 2115//142 2234//142 2240//209 2121//142
f 2086//155 2203//142 2232//142 2113//142
f 2054//1851 2169//142 2193//142 2074//1873
f 2311//142 2386//2138 2388//2141 2313//142
f 2319//2097 2400//2152 2402//2155 2321//2098
f 2313//142 2388//2141 2400//2152 2319//2097
f 2363//2132 2420//2169 2422//2172 2365//2133
f 2436//2184 2437//2183 2381//2136 2380//2135
f 2377//2137 2433//2187 2436//2184 2380//2135
f 2442//2191 2443//2190 2385//733 2384//2119
f 2437//2183 2442//2191 2384//2119 2381//2136
f 2365//2133 2422//2172 2433//2187 2377//2137
f 2321//2098 2402//2155 2420//2169 2363//2132
f 2123//142 2242//2026 2386//2138 2311//142
f 1910//1718 1975//1781 1976//1784 1911//1719
f 1909//1720 1911//1719 1976//1784 1974//1809
f 1912//1740 1979//1788 1980//1787 1913//1741
f 1916//1728 1917//1727 1986//1792 1985//1791
f 1909//1720 1974//1809 1979//1788 1912//1740
f 1910//1718 1916//1728 1985//1791 1975//1781
f 1928//1736 1929//142 2005//1812 2004//1811
f 1932//142 1933//1739 2009//1673 2008//142
f 1929//142 1932//142 2008//142 2005//1812
f 1917//1727 1928//1736 2004//1811 1986//1792
f 1961//1765 1962//1764 2125//1919 2124//1918
f 1966//1767 2129//1923 2128//1922 1965//1768
f 1966//1767 1967//1778 2131//1924 2129//1923
f 1973//1772 2136//1929 2135//1932 1972//1773
f 1972//1773 2135//1932 2131//1924 1967//1778
f 1962//1764 1965//1768 2128//1922 2125//1919
f 1933//1739 1961//1765 2124//1918 2009//1673
f 2449//2201 2450//2202 2452//2203 2451//2204
f 2455//2205 2456//2206 2458//2207 2457//2208
f 2455//2205 2457//2208 2454//2209 2453//2210
f 2459//2211 2460//2212 2462//2213 2461//2214
f 2462//2213 2465//2215 2464//2216 2461//2214
f 2463//2217 2465//2215 2462//2213 2460//2212
f 2467//2218 2468//2219 2470//2220 2469//2221
f 2451//2204 2452//2203 2460//2212 2459//2211
f 2457//2208 2458//2207 2468//2219 2467//2218
f 2457//2208 2467//2218 2466//2222 2454//2209
f 2450//2202 2453//2210 2454//2209 2452//2203
f 2463//2217 2467//2218 2469//2221 2465//2215
f 2466//2222 2467//2218 2463//2217 2460//2212
f 2452//2203 2454//2209 2466//2222 2460//2212
f 2471//2223 2472//2224 2474//2225 2473//2226
f 2475//2227 2476//2228 2478//2229 2477//2230
f 2479//2231 2480//2232 2482//2233 2481//2234
f 2473//2226 2474//2225 2480//2232 2479//2231
f 2472//2224 2475//2227 2477//2230 2474//2225
f 2474//2225 2477//2230 2483//2235 2480//2232
f 2486//2236 2487//2237 2485//2238 2484//2239
f 2490//2240 2491//2241 2489//2242 2488//2243
f 2494//885 2495//885 2493//2244 2492//2245
f 2498//885 2499//885 2497//2246 2496//2247
f 2492//2245 2493//2244 2487//2237 2486//2236
f 2496//2247 2497//2246 2491//2241 2490//2240
f 2487//2237 2490//2240 2488//2243 2485//2238
f 2495//885 2498//885 2496//2247 2493//2244
f 2493//2244 2496//2247 2490//2240 2487//2237
f 2503//2248 2504//2249 2502//2250 2500//2251
f 2508//2252 2509//2253 2511//2254 2510//2255
f 2512//2256 2513//2257 2511//2254 2509//2253
f 2516//885 2517//2258 2515//2259 2514//2260
f 2520//2261 2521//2262 2519//2263 2518//2264
f 2514//2260 2515//2259 2504//2249 2503//2248
f 2518//2264 2519//2263 2513//2257 2512//2256
f 2501//2265 2502//2250 2509//2253 2508//2252
f 2504//2249 2512//2256 2509//2253 2502//2250
f 2517//2258 2520//2261 2518//2264 2515//2259
f 2505//2266 2508//2252 2510//2255 2507//2267
f 2515//2259 2518//2264 2512//2256 2504//2249
f 2484//2239 2485//2238 2458//2207 2456//2206
f 2488//2243 2489//2242 2470//2220 2468//2219
f 2485//2238 2488//2243 2468//2219 2458//2207
f 2478//2229 2502//2250 2501//2265 2477//2230
f 2500//2251 2502//2250 2478//2229 2476//2228
f 2482//2233 2507//2267 2506//2268 2481//2234
f 2505//2266 2507//2267 2482//2233 2480//2232
f 2483//2235 2508//2252 2505//2266 2480//2232
f 2501//2265 2508//2252 2483//2235 2477//2230
f 2464//2216 2465//2215 2472//2224 2471//2223
f 2469//2221 2470//2220 2476//2228 2475//2227
f 2465//2215 2469//2221 2475//2227 2472//2224
f 2491//2241 2503//2248 2500//2251 2489//2242
f 2499//885 2516//885 2514//2260 2497//2246
f 2497//2246 2514//2260 2503//2248 2491//2241
f 2489//2242 2500//2251 2476//2228 2470//2220
f 2522//2269 2523//2270 2525//2271 2524//2272
f 2525//2271 2527//2273 2526//2274 2524//2272
f 2531//2275 2532//2276 2534//2277 2533//2278
f 2529//2279 2532//2276 2531//2275 2528//2280
f 2531//2275 2533//2278 2530//2281 2528//2280
f 2535//2274 2536//2282 2538//2283 2537//2284
f 2544//2285 2545//2286 2543//2287 2542//2288
f 2548//2289 2549//2290 2551//2291 2550//2292
f 2551//2291 2554//2293 2553//2294 2550//2292
f 2552//2295 2554//2293 2551//2291 2549//2290
f 2542//2288 2543//2287 2534//2277 2532//2276
f 2538//2283 2547//2296 2546//2297 2537//2284
f 2540//2298 2549//2290 2548//2289 2539//2299
f 2548//2289 2550//2292 2541//2300 2539//2299
f 2526//2274 2527//2273 2536//2282 2535//2274
f 2533//2278 2534//2277 2540//2298 2539//2299
f 2545//2286 2552//2295 2549//2290 2543//2287
f 2523//2270 2528//2280 2530//2281 2525//2271
f 2530//2281 2533//2278 2527//2273 2525//2271
f 2536//2282 2539//2299 2541//2300 2538//2283
f 2527//2273 2533//2278 2539//2299 2536//2282
f 2541//2300 2550//2292 2547//2296 2538//2283
f 2543//2287 2549//2290 2540//2298 2534//2277
f 2557//2301 2558//2302 2560//2303 2559//2304
f 2556//2305 2558//2302 2557//2301 2555//2306
f 2562//2307 2563//2308 2565//2309 2564//2310
f 2558//2302 2562//2307 2564//2310 2560//2303
f 2561//2311 2562//2307 2558//2302 2556//2305
f 2546//2297 2547//2296 2556//2305 2555//2306
f 2553//2294 2554//2293 2563//2308 2562//2307
f 2553//2294 2562//2307 2561//2311 2550//2292
f 2547//2296 2550//2292 2561//2311 2556//2305
f 2568//2312 2569//2313 2567//885 2566//885
f 2572//2314 2573//2315 2571//885 2570//885
f 2577//2316 2578//2317 2575//2318 2574//2319
f 2581//2320 2582//2321 2580//2322 2579//2323
f 2574//2319 2575//2318 2569//2313 2568//2312
f 2579//2323 2580//2322 2573//2315 2572//2314
f 2569//2313 2572//2314 2570//885 2567//885
f 2578//2317 2581//2320 2579//2323 2575//2318
f 2575//2318 2579//2323 2572//2314 2569//2313
f 2585//2324 2586//2325 2584//885 2583//885
f 2589//885 2590//885 2588//1382 2587//885
f 2593//2326 2594//2327 2592//2328 2591//2329
f 2597//2330 2598//2331 2596//2332 2595//2333
f 2591//2329 2592//2328 2586//2325 2585//2324
f 2595//2333 2596//2332 2590//885 2589//885
f 2586//2325 2589//885 2587//885 2584//885
f 2594//2327 2597//2330 2595//2333 2592//2328
f 2592//2328 2595//2333 2589//885 2586//2325
f 2601//2334 2602//2335 2600//2336 2599//2337
f 2605//2338 2606//2339 2604//2340 2603//2341
f 2609//2342 2610//2343 2608//2344 2607//2345
f 2609//2342 2611//2346 2612//2347 2610//2343
f 2615//2348 2616//2349 2614//2350 2613//2351
f 2607//2345 2608//2344 2602//2335 2601//2334
f 2613//2351 2614//2350 2606//2339 2605//2338
f 2602//2335 2605//2338 2603//2341 2600//2336
f 2610//2343 2615//2348 2613//2351 2608//2344
f 2610//2343 2612//2347 2617//2352 2615//2348
f 2608//2344 2613//2351 2605//2338 2602//2335
f 2620//2353 2621//2354 2619//2355 2618//2356
f 2624//2357 2625//2358 2623//2359 2622//2360
f 2624//2357 2627//2361 2628//2362 2625//2358
f 2626//2363 2627//2361 2624//2357 2622//2360
f 2632//2364 2633//2365 2630//2366 2629//2367
f 2639//2368 2640//2369 2638//2370 2637//2371
f 2639//2368 2641//2372 2642//2373 2640//2369
f 2645//2374 2646//2375 2644//2376 2643//2377
f 2620//2353 2634//2378 2635//2379 2621//2354
f 2631//2380 2643//2377 2644//2376 2632//2364
f 2644//2376 2646//2375 2633//2365 2632//2364
f 2637//2371 2638//2370 2635//2379 2634//2378
f 2631//2380 2632//2364 2628//2362 2627//2361
f 2628//2362 2632//2364 2629//2367 2625//2358
f 2621//2354 2627//2361 2626//2363 2619//2355
f 2640//2369 2645//2374 2643//2377 2638//2370
f 2640//2369 2642//2373 2647//2381 2645//2374
f 2638//2370 2643//2377 2636//2382 2635//2379
f 2621//2354 2635//2379 2636//2382 2627//2361
f 2636//2382 2643//2377 2631//2380 2627//2361
f 2576//2383 2603//2341 2604//2340 2577//2316
f 2604//2340 2606//2339 2578//2317 2577//2316
f 2614//2350 2616//2349 2582//2321 2581//2320
f 2606//2339 2614//2350 2581//2320 2578//2317
f 2623//2359 2625//2358 2594//2327 2593//2326
f 2629//2367 2630//2366 2598//2331 2597//2330
f 2625//2358 2629//2367 2597//2330 2594//2327
f 2573//2315 2585//2324 2583//885 2571//885
f 2582//2321 2593//2326 2591//2329 2580//2322
f 2580//2322 2591//2329 2585//2324 2573//2315
f 2618//2356 2619//2355 2612//2347 2611//2346
f 2622//2360 2623//2359 2616//2349 2615//2348
f 2617//2352 2626//2363 2622//2360 2615//2348
f 2619//2355 2626//2363 2617//2352 2612//2347
f 2616//2349 2623//2359 2593//2326 2582//2321
f 2650//885 2651//2384 2649//2385 2648//2386
f 2654//2387 2655//2388 2653//2389 2652//2390
f 2658//2391 2659//2392 2657//885 2656//885
f 2662//885 2663//1389 2661//2393 2660//1382
f 2656//885 2657//885 2651//2384 2650//885
f 2660//1382 2661//2393 2655//2388 2654//2387
f 2651//2384 2654//2387 2652//2390 2649//2385
f 2659//2392 2662//885 2660//1382 2657//885
f 2657//885 2660//1382 2654//2387 2651//2384
f 2669//2394 2670//2395 2668//2396 2666//2397
f 2673//2398 2674//2399 2676//2400 2675//2401
f 2672//2402 2674//2399 2673//2398 2671//2403
f 2679//2404 2680//2405 2682//2406 2681//2407
f 2678//2408 2680//2405 2679//2404 2677//2409
f 2685//2410 2686//2411 2684//2412 2683//2413
f 2691//2414 2694//2415 2693//2416 2690//2417
f 2692//2418 2694//2415 2691//2414 2689//2419
f 2683//2413 2684//2412 2670//2395 2669//2394
f 2676//2400 2688//2420 2687//2421 2675//2401
f 2682//2406 2691//2414 2690//2417 2681//2407
f 2689//2419 2691//2414 2682//2406 2680//2405
f 2664//2422 2665//2423 2672//2402 2671//2403
f 2667//2424 2668//2396 2678//2408 2677//2409
f 2670//2395 2680//2405 2678//2408 2668//2396
f 2686//2411 2692//2418 2689//2419 2684//2412
f 2674//2399 2679//2404 2681//2407 2676//2400
f 2677//2409 2679//2404 2674//2399 2672//2402
f 2665//2423 2667//2424 2677//2409 2672//2402
f 2681//2407 2690//2417 2688//2420 2676//2400
f 2684//2412 2689//2419 2680//2405 2670//2395
f 2697//2425 2698//2426 2696//2427 2695//2428
f 2701//2429 2702//2332 2700//885 2699//2430
f 2710//2431 2711//2432 2709//2433 2708//2434
f 2705//2435 2708//2434 2709//2433 2706//2436
f 2709//2433 2711//2432 2707//2437 2706//2436
f 2714//2438 2715//2439 2713//2440 2712//2441
f 2706//2436 2707//2437 2698//2426 2697//2425
f 2712//2441 2713//2440 2702//2332 2701//2429
f 2698//2426 2701//2429 2699//2430 2696//2427
f 2711//2432 2714//2438 2712//2441 2707//2437
f 2707//2437 2712//2441 2701//2429 2698//2426
f 2718//885 2719//2258 2717//2442 2716//2443
f 2722//2444 2723//2445 2721//2446 2720//2447
f 2726//2448 2727//885 2725//885 2724//2449
f 2730//885 2731//2450 2729//2451 2728//2452
f 2724//2449 2725//885 2719//2258 2718//885
f 2728//2452 2729//2451 2723//2445 2722//2444
f 2719//2258 2722//2444 2720//2447 2717//2442
f 2727//885 2730//885 2728//2452 2725//885
f 2725//885 2728//2452 2722//2444 2719//2258
f 2695//2428 2696//2427 2659//2392 2658//2391
f 2699//2430 2700//885 2663//1389 2662//885
f 2696//2427 2699//2430 2662//885 2659//2392
f 2716//2443 2717//2442 2686//2411 2685//2410
f 2720//2447 2721//2446 2694//2415 2692//2418
f 2717//2442 2720//2447 2692//2418 2686//2411
f 2655//2388 2669//2394 2666//2397 2653//2389
f 2663//1389 2685//2410 2683//2413 2661//2393
f 2661//2393 2683//2413 2669//2394 2655//2388
f 2702//2332 2718//885 2716//2443 2700//885
f 2715//2439 2726//2448 2724//2449 2713//2440
f 2713//2440 2724//2449 2718//885 2702//2332
f 2700//885 2716//2443 2685//2410 2663//1389
f 2566//885 2567//885 2495//885 2494//885
f 2570//885 2571//885 2499//885 2498//885
f 2567//885 2570//885 2498//885 2495//885
f 2583//885 2584//885 2517//2258 2516//885
f 2587//885 2588//1382 2521//2262 2520//2261
f 2584//885 2587//885 2520//2261 2517//2258
f 2571//885 2583//885 2516//885 2499//885
f 2648//2386 2649//2385 2545//2286 2544//2285
f 2652//2390 2653//2389 2554//2293 2552//2295
f 2649//2385 2652//2390 2552//2295 2545//2286
f 2560//2303 2665//2423 2664//2422 2559//2304
f 2565//2309 2668//2396 2667//2424 2564//2310
f 2666//2397 2668//2396 2565//2309 2563//2308
f 2564//2310 2667//2424 2665//2423 2560//2303
f 2653//2389 2666//2397 2563//2308 2554//2293
f 2506//2268 2507//2267 2523//2270 2522//2269
f 2510//2255 2511//2254 2529//2279 2528//2280
f 2513//2257 2532//2276 2529//2279 2511//2254
f 2521//2262 2544//2285 2542//2288 2519//2263
f 2507//2267 2510//2255 2528//2280 2523//2270
f 2519//2263 2542//2288 2532//2276 2513//2257
f 2590//885 2650//885 2648//2386 2588//1382
f 2598//2331 2658//2391 2656//885 2596//2332
f 2596//2332 2656//885 2650//885 2590//885
f 2703//2453 2704//2454 2642//2373 2641//2372
f 2633//2365 2697//2425 2695//2428 2630//2366
f 2705//2435 2706//2436 2646//2375 2645//2374
f 2647//2381 2708//2434 2705//2435 2645//2374
f 2704//2454 2708//2434 2647//2381 2642//2373
f 2646//2375 2706//2436 2697//2425 2633//2365
f 2630//2366 2695//2428 2658//2391 2598//2331
f 2588//1382 2648//2386 2544//2285 2521//2262
f 2734//2455 2735//2456 2737//2457 2736//2458
f 2733//2459 2735//2456 2734//2455 2732//2460
f 2735//2456 2739//2461 2741//2462 2737//2457
f 2738//2463 2739//2461 2735//2456 2733//2459
f 2743//2464 2745//2465 2744//2466 2742//2467
f 2746//2468 2747//2469 2749//2470 2748//2471
f 2749//2470 2752//2472 2751//2473 2748//2471
f 2750//2474 2752//2472 2749//2470 2747//2469
f 2759//2475 2760//2476 2758//2477 2756//2478
f 2763//2479 2764//2480 2766//2481 2765//2482
f 2762//2483 2764//2480 2763//2479 2761//2484
f 2768//2485 2770//2486 2769//2487 2767//2488
f 2752//2472 2758//2477 2757//2489 2751//2473
f 2756//2478 2758//2477 2752//2472 2750//2474
f 2754//2490 2762//2483 2761//2484 2753//2491
f 2744//2466 2745//2465 2754//2490 2753//2491
f 2757//2489 2758//2477 2768//2485 2767//2488
f 2760//2476 2770//2486 2768//2485 2758//2477
f 2748//2471 2751//2473 2745//2465 2743//2464
f 2764//2480 2769//2487 2771//2492 2766//2481
f 2767//2488 2769//2487 2764//2480 2762//2483
f 2745//2465 2751//2473 2755//2493 2754//2490
f 2755//2493 2767//2488 2762//2483 2754//2490
f 2757//2489 2767//2488 2755//2493 2751//2473
f 2737//2457 2743//2464 2742//2467 2736//2458
f 2740//2494 2747//2469 2746//2468 2739//2461
f 2746//2468 2748//2471 2741//2462 2739//2461
f 2741//2462 2748//2471 2743//2464 2737//2457
f 2687//2421 2688//2420 2733//2459 2732//2460
f 2693//2416 2694//2415 2740//2494 2739//2461
f 2693//2416 2739//2461 2738//2463 2690//2417
f 2688//2420 2690//2417 2738//2463 2733//2459
f 2723//2445 2750//2474 2747//2469 2721//2446
f 2731//2450 2759//2475 2756//2478 2729//2451
f 2729//2451 2756//2478 2750//2474 2723//2445
f 2721//2446 2747//2469 2740//2494 2694//2415
f 2774//2495 2775//2496 2773//2497 2772//2498
f 2774//2495 2776//2499 2777//2500 2775//2496
f 2779//2501 2781//2502 2782//2503 2780//2504
f 2788//2505 2789//2506 2786//2507 2785//2508
f 2790//2509 2792//2510 2793//2511 2791//2512
f 2797//2513 2798//2514 2796//2515 2795//2516
f 2797//2513 2800//2517 2801//2518 2798//2514
f 2799//2519 2800//2517 2797//2513 2795//2516
f 2783//2520 2790//2509 2791//2512 2784//2521
f 2787//2522 2795//2516 2796//2515 2788//2505
f 2796//2515 2798//2514 2789//2506 2788//2505
f 2783//2520 2784//2521 2777//2500 2776//2499
f 2787//2522 2788//2505 2782//2503 2781//2502
f 2782//2503 2788//2505 2785//2508 2780//2504
f 2775//2496 2779//2501 2778//2523 2773//2497
f 2775//2496 2777//2500 2781//2502 2779//2501
f 2794//2524 2800//2517 2799//2519 2793//2511
f 2791//2512 2793//2511 2799//2519 2795//2516
f 2784//2521 2787//2522 2781//2502 2777//2500
f 2784//2521 2791//2512 2795//2516 2787//2522
f 2804//2525 2805//2526 2803//2527 2802//2528
f 2808//885 2809//885 2807//2384 2806//885
f 2812//2529 2813//2530 2811//2531 2810//2532
f 2816//2533 2817//885 2815//885 2814//2534
f 2810//2532 2811//2531 2805//2526 2804//2525
f 2814//2534 2815//885 2809//885 2808//885
f 2805//2526 2808//885 2806//885 2803//2527
f 2813//2530 2816//2533 2814//2534 2811//2531
f 2811//2531 2814//2534 2808//885 2805//2526
f 2820//2535 2821//2536 2819//2537 2818//2538
f 2820//2535 2822//2539 2823//2540 2821//2536
f 2824//2541 2826//2542 2827//2543 2825//2544
f 2828//2545 2830//2546 2831//2547 2829//2548
f 2822//2539 2828//2545 2829//2548 2823//2540
f 2821//2536 2823//2540 2826//2542 2824//2541
f 2829//2548 2831//2547 2833//2549 2832//2550
f 2823//2540 2829//2548 2832//2550 2826//2542
f 2837//2551 2838//2552 2835//2553 2834//2554
f 2841//2555 2842//885 2840//885 2839//2556
f 2843//2557 2846//2558 2847//2559 2844//2560
f 2847//2559 2848//2561 2845//2562 2844//2560
f 2851//2563 2852//2564 2850//2565 2849//2566
f 2836//2567 2843//2557 2844//2560 2837//2551
f 2844//2560 2845//2562 2838//2552 2837//2551
f 2849//2566 2850//2565 2842//885 2841//2555
f 2838//2552 2841//2555 2839//2556 2835//2553
f 2848//2561 2851//2563 2849//2566 2845//2562
f 2845//2562 2849//2566 2841//2555 2838//2552
f 2792//2510 2818//2538 2819//2537 2793//2511
f 2819//2537 2821//2536 2794//2524 2793//2511
f 2800//2517 2824//2541 2825//2544 2801//2518
f 2794//2524 2821//2536 2824//2541 2800//2517
f 2834//2554 2835//2553 2813//2530 2812//2529
f 2839//2556 2840//885 2817//885 2816//2533
f 2835//2553 2839//2556 2816//2533 2813//2530
f 2789//2506 2804//2525 2802//2528 2786//2507
f 2801//2518 2812//2529 2810//2532 2798//2514
f 2798//2514 2810//2532 2804//2525 2789//2506
f 2836//2567 2837//2551 2827//2543 2826//2542
f 2827//2543 2837//2551 2834//2554 2825//2544
f 2833//2549 2846//2558 2843//2557 2832//2550
f 2832//2550 2843//2557 2836//2567 2826//2542
f 2825//2544 2834//2554 2812//2529 2801//2518
f 2853//2568 2855//2569 2856//2570 2854//2571
f 2859//2572 2861//2573 2862//2574 2860//2575
f 2855//2569 2859//2572 2860//2575 2856//2570
f 2854//2571 2856//2570 2858//2576 2857//2577
f 2860//2575 2862//2574 2864//2578 2863//2579
f 2856//2570 2860//2575 2863//2579 2858//2576
f 2865//2580 2868//2581 2869//2582 2866//2583
f 2869//2582 2870//2584 2867//2585 2866//2583
f 2873//2586 2874//2587 2872//2588 2871//2589
f 2875//2590 2878//2591 2879//2592 2876//2593
f 2879//2592 2880//2594 2877//2595 2876//2593
f 2883//2596 2884//899 2882//2597 2881//2598
f 2868//2581 2875//2590 2876//2593 2869//2582
f 2876//2593 2877//2595 2870//2584 2869//2582
f 2881//2598 2882//2597 2874//2587 2873//2586
f 2870//2584 2873//2586 2871//2589 2867//2585
f 2880//2594 2883//2596 2881//2598 2877//2595
f 2877//2595 2881//2598 2873//2586 2870//2584
f 2885//2599 2887//2600 2888//2601 2886//2602
f 2892//2603 2893//2604 2895//2605 2894//2606
f 2892//2603 2896//2607 2897//2608 2893//2604
f 2897//2608 2898//2609 2895//2605 2893//2604
f 2899//2610 2902//2611 2903//2612 2900//2613
f 2887//2600 2894//2606 2895//2605 2888//2601
f 2890//2614 2899//2610 2900//2613 2891//2615
f 2886//2602 2888//2601 2890//2614 2889//2616
f 2897//2608 2901//2617 2902//2611 2898//2609
f 2895//2605 2898//2609 2902//2611 2899//2610
f 2888//2601 2895//2605 2899//2610 2890//2614
f 2904//2618 2907//2619 2908//2620 2905//2621
f 2908//2620 2909//2622 2906//2623 2905//2621
f 2912//2624 2913//885 2911//885 2910//2625
f 2916//2626 2917//2627 2915//2628 2914//2629
f 2920//2630 2921//885 2919//885 2918//2631
f 2914//2629 2915//2628 2909//2622 2908//2620
f 2918//2631 2919//885 2913//885 2912//2624
f 2909//2622 2912//2624 2910//2625 2906//2623
f 2917//2627 2920//2630 2918//2631 2915//2628
f 2915//2628 2918//2631 2912//2624 2909//2622
f 2861//2573 2885//2599 2886//2602 2862//2574
f 2862//2574 2886//2602 2889//2616 2864//2578
f 2878//2591 2904//2618 2905//2621 2879//2592
f 2905//2621 2906//2623 2880//2594 2879//2592
f 2910//2625 2911//885 2884//899 2883//2596
f 2906//2623 2910//2625 2883//2596 2880//2594
f 2858//2576 2868//2581 2865//2580 2857//2577
f 2864//2578 2878//2591 2875//2590 2863//2579
f 2863//2579 2875//2590 2868//2581 2858//2576
f 2890//2614 2891//2615 2908//2620 2907//2619
f 2890//2614 2907//2619 2904//2618 2889//2616
f 2903//2612 2916//2626 2914//2629 2900//2613
f 2900//2613 2914//2629 2908//2620 2891//2615
f 2889//2616 2904//2618 2878//2591 2864//2578
f 2830//2546 2853//2568 2854//2571 2831//2547
f 2831//2547 2854//2571 2857//2577 2833//2549
f 2846//2558 2865//2580 2866//2583 2847//2559
f 2866//2583 2867//2585 2848//2561 2847//2559
f 2871//2589 2872//2588 2852//2564 2851//2563
f 2867//2585 2871//2589 2851//2563 2848//2561
f 2857//2577 2865//2580 2846//2558 2833//2549
f 2924//2632 2925//2633 2923//2634 2922//2635
f 2927//2636 2929//2637 2928//2638 2926//2639
f 2930//2640 2931//2641 2933//2642 2932//2643
f 2933//2642 2936//2644 2935//2645 2932//2643
f 2934//2646 2936//2644 2933//2642 2931//2641
f 2939//2647 2940//2648 2938//2649 2937//2650
f 2943//2651 2946//2652 2945//2653 2942//2654
f 2944//2655 2946//2652 2943//2651 2941//2656
f 2937//2650 2938//2649 2925//2633 2924//2632
f 2936//2644 2943//2651 2942//2654 2935//2645
f 2941//2656 2943//2651 2936//2644 2934//2646
f 2925//2633 2934//2646 2931//2641 2923//2634
f 2940//2648 2944//2655 2941//2656 2938//2649
f 2932//2643 2935//2645 2929//2637 2927//2636
f 2938//2649 2941//2656 2934//2646 2925//2633
f 2951//2657 2953//2658 2952//2659 2950//2660
f 2948//2661 2951//2657 2950//2660 2947//2662
f 2954//2663 2955//2664 2953//2658 2951//2657
f 2949//2665 2954//2663 2951//2657 2948//2661
f 2959//885 2960//2666 2958//2667 2957//885
f 2963//2668 2964//2669 2962//2670 2961//2671
f 2967//885 2968//2672 2966//2673 2965//885
f 2971//2674 2972//2675 2970//2676 2969//2677
f 2965//885 2966//2673 2960//2666 2959//885
f 2969//2677 2970//2676 2964//2669 2963//2668
f 2960//2666 2963//2668 2961//2671 2958//2667
f 2968//2672 2971//2674 2969//2677 2966//2673
f 2966//2673 2969//2677 2963//2668 2960//2666
f 2974//2678 2976//2679 2975//2680 2973//2681
f 2978//2682 2980//2683 2979//2684 2977//2685
f 2983//2686 2984//2687 2986//2688 2985//2689
f 2982//2690 2984//2687 2983//2686 2981//2691
f 2988//2692 2990//2693 2989//2694 2987//2695
f 2976//2679 2982//2690 2981//2691 2975//2680
f 2980//2683 2988//2692 2987//2695 2979//2684
f 2977//2685 2979//2684 2976//2679 2974//2678
f 2987//2695 2989//2694 2984//2687 2982//2690
f 2979//2684 2987//2695 2982//2690 2976//2679
f 2957//885 2958//2667 2940//2648 2939//2647
f 2961//2671 2962//2670 2946//2652 2944//2655
f 2958//2667 2961//2671 2944//2655 2940//2648
f 2953//2658 2974//2678 2973//2681 2952//2659
f 2956//2696 2978//2682 2977//2685 2955//2664
f 2955//2664 2977//2685 2974//2678 2953//2658
f 2928//2638 2929//2637 2948//2661 2947//2662
f 2945//2653 2946//2652 2956//2696 2955//2664
f 2945//2653 2955//2664 2954//2663 2942//2654
f 2929//2637 2935//2645 2949//2665 2948//2661
f 2942//2654 2954//2663 2949//2665 2935//2645
f 2964//2669 2980//2683 2978//2682 2962//2670
f 2972//2675 2990//2693 2988//2692 2970//2676
f 2970//2676 2988//2692 2980//2683 2964//2669
f 2962//2670 2978//2682 2956//2696 2946//2652
f 2993//885 2994//2697 2992//2698 2991//885
f 2997//2699 2998//2700 2996//2701 2995//2702
f 3001//885 3002//2703 3000//2704 2999//885
f 3005//2705 3006//2706 3004//2707 3003//2708
f 2999//885 3000//2704 2994//2697 2993//885
f 3003//2708 3004//2707 2998//2700 2997//2699
f 2994//2697 2997//2699 2995//2702 2992//2698
f 3002//2703 3005//2705 3003//2708 3000//2704
f 3000//2704 3003//2708 2997//2699 2994//2697
f 3009//2709 3011//2710 3010//2711 3008//2712
f 3013//2713 3016//2714 3015//2715 3012//2716
f 3015//2715 3017//2717 3014//2718 3012//2716
f 3023//2719 3024//2720 3022//2721 3021//2722
f 3020//2723 3024//2720 3023//2719 3019//2724
f 3022//2721 3024//2720 3020//2723 3018//2725
f 3026//2726 3029//2727 3028//2728 3025//2729
f 3011//2710 3020//2723 3019//2724 3010//2711
f 3016//2714 3026//2726 3025//2729 3015//2715
f 3025//2729 3027//2730 3017//2717 3015//2715
f 3007//2731 3012//2716 3014//2718 3009//2709
f 3014//2718 3017//2717 3011//2710 3009//2709
f 3020//2723 3027//2730 3025//2729 3018//2725
f 3025//2729 3028//2728 3022//2721 3018//2725
f 3017//2717 3027//2730 3020//2723 3011//2710
f 3032//885 3033//2732 3031//2733 3030//885
f 3036//2734 3037//2735 3035//2736 3034//2737
f 3040//2738 3041//2739 3039//2740 3038//951
f 3044//2741 3047//2742 3046//2743 3043//2744
f 3045//2745 3047//2742 3044//2741 3042//2746
f 3038//951 3039//2740 3033//2732 3032//885
f 3042//2746 3044//2741 3037//2735 3036//2734
f 3033//2732 3036//2734 3034//2737 3031//2733
f 3041//2739 3045//2745 3042//2746 3039//2740
f 3039//2740 3042//2746 3036//2734 3033//2732
f 3049//2747 3051//2748 3050//2749 3048//2750
f 3053//2751 3055//2752 3054//2753 3052//2754
f 3057//2755 3059//2756 3058//2757 3056//2758
f 3051//2748 3057//2755 3056//2758 3050//2749
f 3055//2752 3061//2759 3060//2760 3054//2753
f 3052//2754 3054//2753 3051//2748 3049//2747
f 3060//2760 3062//2761 3059//2756 3057//2755
f 3054//2753 3060//2760 3057//2755 3051//2748
f 3030//885 3031//2733 3002//2703 3001//885
f 3034//2737 3035//2736 3006//2706 3005//2705
f 3031//2733 3034//2737 3005//2705 3002//2703
f 3022//2721 3049//2747 3048//2750 3021//2722
f 3029//2727 3053//2751 3052//2754 3028//2728
f 3028//2728 3052//2754 3049//2747 3022//2721
f 2998//2700 3016//2714 3013//2713 2996//2701
f 3006//2706 3029//2727 3026//2726 3004//2707
f 3004//2707 3026//2726 3016//2714 2998//2700
f 3037//2735 3055//2752 3053//2751 3035//2736
f 3060//2760 3061//2759 3044//2741 3043//2744
f 3046//2743 3062//2761 3060//2760 3043//2744
f 3044//2741 3061//2759 3055//2752 3037//2735
f 3035//2736 3053//2751 3029//2727 3006//2706
f 2991//885 2992//2698 2968//2672 2967//885
f 2995//2702 2996//2701 2972//2675 2971//2674
f 2992//2698 2995//2702 2971//2674 2968//2672
f 2986//2688 3009//2709 3008//2712 2985//2689
f 3007//2731 3009//2709 2986//2688 2984//2687
f 2990//2693 3013//2713 3012//2716 2989//2694
f 2989//2694 3012//2716 3007//2731 2984//2687
f 2996//2701 3013//2713 2990//2693 2972//2675
f 3066//2762 3068//2763 3069//2764 3067//2765
f 3070//2766 3072//2767 3073//2768 3071//2769
f 3063//2770 3066//2762 3067//2765 3064//2771
f 3067//2765 3069//2764 3072//2767 3070//2766
f 3064//2771 3067//2765 3070//2766 3065//2772
f 3077//2773 3079//2774 3080//2775 3078//2776
f 3081//2777 3082//2778 3084//2779 3083//2780
f 3081//2777 3085//2781 3086//2782 3082//2778
f 3086//2782 3087//2783 3084//2779 3082//2778
f 3090//2784 3091//2785 3093//2786 3092//2787
f 3088//2788 3092//2787 3093//2786 3089//2789
f 3094//2790 3097//2791 3098//2792 3095//2793
f 3102//2794 3103//2795 3101//2796 3100//2797
f 3074//2798 3088//2788 3089//2789 3075//2799
f 3085//2781 3099//2800 3100//2797 3086//2782
f 3100//2797 3101//2796 3087//2783 3086//2782
f 3074//2798 3075//2799 3080//2775 3079//2774
f 3094//2790 3095//2793 3100//2797 3099//2800
f 3098//2792 3102//2794 3100//2797 3095//2793
f 3078//2776 3080//2775 3085//2781 3081//2777
f 3091//2785 3096//2801 3097//2791 3093//2786
f 3089//2789 3093//2786 3097//2791 3094//2790
f 3075//2799 3076//2802 3085//2781 3080//2775
f 3075//2799 3089//2789 3094//2790 3076//2802
f 3094//2790 3099//2800 3085//2781 3076//2802
f 3106//2803 3107//2804 3105//2805 3104//2806
f 3110//885 3111//885 3109//885 3108//2807
f 3114//2808 3115//884 3113//2809 3112//2810
f 3118//885 3119//2811 3117//2812 3116//885
f 3112//2810 3113//2809 3107//2804 3106//2803
f 3116//885 3117//2812 3111//885 3110//885
f 3107//2804 3110//885 3108//2807 3105//2805
f 3115//884 3118//885 3116//885 3113//2809
f 3113//2809 3116//885 3110//885 3107//2804
f 3120//2813 3122//2770 3123//2814 3121//2815
f 3124//2816 3125//2817 3127//2818 3126//2819
f 3124//2816 3128//2820 3129//2821 3125//2817
f 3129//2821 3130//2822 3127//2818 3125//2817
f 3133//2823 3134//2824 3132//2825 3131//2826
f 3137//1475 3138//2827 3136//2828 3135//2829
f 3144//2830 3145//2831 3143//2832 3142//2833
f 3143//2832 3145//2831 3141//2834 3140//2835
f 3148//1475 3149//2827 3147//2827 3146//1475
f 3154//2836 3155//2837 3153//2838 3152//2836
f 3153//2838 3155//2837 3151//2839 3150//2840
f 3128//2820 3139//2841 3140//2835 3129//2821
f 3140//2835 3141//2834 3130//2822 3129//2821
f 3150//2840 3151//2839 3134//2824 3133//2823
f 3146//1475 3147//2827 3138//2827 3137//1475
f 3130//2822 3133//2823 3131//2826 3127//2818
f 3152//2836 3153//2838 3145//2831 3144//2830
f 3145//2831 3153//2838 3150//2840 3141//2834
f 3121//2815 3123//2814 3128//2820 3124//2816
f 3138//2827 3144//2830 3142//2833 3136//2828
f 3149//2827 3154//2836 3152//2836 3147//2827
f 3147//2827 3152//2836 3144//2830 3138//2827
f 3141//2834 3150//2840 3133//2823 3130//2822
f 3158//2842 3159//2843 3157//2844 3156//2845
f 3162//2843 3163//2846 3161//2847 3160//2844
f 3166//1475 3167//2827 3165//2827 3164//1475
f 3172//2836 3173//2837 3171//2837 3170//2836
f 3171//2837 3173//2837 3169//2848 3168//2848
f 3176//1475 3177//2827 3175//2827 3174//1475
f 3182//2849 3183//2850 3181//2837 3180//2836
f 3181//2837 3183//2850 3179//2851 3178//2848
f 3168//2848 3169//2848 3159//2843 3158//2842
f 3178//2848 3179//2851 3163//2846 3162//2843
f 3174//1475 3175//2827 3167//2827 3166//1475
f 3159//2843 3162//2843 3160//2844 3157//2844
f 3180//2836 3181//2837 3173//2837 3172//2836
f 3173//2837 3181//2837 3178//2848 3169//2848
f 3167//2827 3172//2836 3170//2836 3165//2827
f 3177//2827 3182//2849 3180//2836 3175//2827
f 3175//2827 3180//2836 3172//2836 3167//2827
f 3169//2848 3178//2848 3162//2843 3159//2843
f 3090//2784 3120//2813 3121//2815 3091//2785
f 3097//2791 3126//2819 3127//2818 3098//2792
f 3124//2816 3126//2819 3097//2791 3096//2801
f 3131//2826 3132//2825 3103//2795 3102//2794
f 3091//2785 3121//2815 3124//2816 3096//2801
f 3127//2818 3131//2826 3102//2794 3098//2792
f 3156//2845 3157//2844 3115//884 3114//2808
f 3160//2844 3161//2847 3119//2811 3118//885
f 3157//2844 3160//2844 3118//885 3115//884
f 3087//2783 3106//2803 3104//2806 3084//2779
f 3103//2795 3114//2808 3112//2810 3101//2796
f 3101//2796 3112//2810 3106//2803 3087//2783
f 3164//1475 3165//2827 3149//2827 3148//1475
f 3134//2824 3158//2842 3156//2845 3132//2825
f 3170//2836 3171//2837 3155//2837 3154//2836
f 3155//2837 3171//2837 3168//2848 3151//2839
f 3165//2827 3170//2836 3154//2836 3149//2827
f 3151//2839 3168//2848 3158//2842 3134//2824
f 3132//2825 3156//2845 3114//2808 3103//2795
f 3063//2770 3064//2771 3123//2814 3122//2770
f 3135//2829 3136//2828 3069//2764 3068//2763
f 3070//2766 3071//2769 3140//2835 3139//2841
f 3142//2833 3143//2832 3073//2768 3072//2767
f 3073//2768 3143//2832 3140//2835 3071//2769
f 3064//2771 3065//2772 3128//2820 3123//2814
f 3136//2828 3142//2833 3072//2767 3069//2764
f 3070//2766 3139//2841 3128//2820 3065//2772
f 3186//2852 3187//2853 3185//2854 3184//2855
f 3189//2856 3191//2857 3190//2858 3188//2859
f 3194//2860 3197//2861 3196//2862 3193//2863
f 3195//2864 3197//2861 3194//2860 3192//2865
f 3200//2866 3201//2867 3199//2868 3198//2869
f 3206//2870 3207//2871 3205//2872 3204//2873
f 3203//2874 3207//2871 3206//2870 3202//2875
f 3210//2876 3211//2877 3209//2878 3208//2879
f 3209//2878 3213//2880 3212//2881 3208//2879
f 3212//2881 3214//2882 3210//2876 3208//2879
f 3198//2869 3199//2868 3187//2853 3186//2852
f 3191//2857 3203//2874 3202//2875 3190//2858
f 3197//2861 3211//2877 3210//2876 3196//2862
f 3209//2878 3211//2877 3197//2861 3195//2864
f 3187//2853 3195//2864 3192//2865 3185//2854
f 3201//2867 3213//2880 3209//2878 3199//2868
f 3193//2863 3196//2862 3191//2857 3189//2856
f 3207//2871 3214//2882 3212//2881 3205//2872
f 3210//2876 3214//2882 3207//2871 3203//2874
f 3196//2862 3210//2876 3203//2874 3191//2857
f 3199//2868 3209//2878 3195//2864 3187//2853
f 3220//2883 3222//2884 3219//2885 3218//2886
f 3224//2887 3226//2888 3225//2889 3223//2890
f 3228//2891 3230//2892 3229//2893 3227//2894
f 3235//2895 3236//2896 3234//2897 3233//2898
f 3232//2899 3236//2896 3235//2895 3231//2900
f 3242//2901 3243//2902 3241//2903 3240//2904
f 3239//2905 3243//2902 3242//2901 3238//2906
f 3241//2903 3243//2902 3239//2905 3237//2907
f 3222//2884 3239//2905 3238//2906 3221//2908
f 3237//2907 3239//2905 3222//2884 3220//2883
f 3226//2888 3245//2909 3244//2910 3225//2889
f 3244//2910 3245//2909 3232//2899 3231//2900
f 3229//2893 3230//2892 3222//2884 3221//2908
f 3222//2884 3230//2892 3228//2891 3219//2885
f 3227//2894 3229//2893 3226//2888 3224//2887
f 3236//2896 3242//2901 3240//2904 3234//2897
f 3238//2906 3242//2901 3236//2896 3232//2899
f 3245//2909 3246//2911 3238//2906 3232//2899
f 3229//2893 3246//2911 3245//2909 3226//2888
f 3238//2906 3246//2911 3229//2893 3221//2908
f 3218//2886 3219//2885 3201//2867 3200//2866
f 3205//2872 3224//2887 3223//2890 3204//2873
f 3213//2880 3228//2891 3227//2894 3212//2881
f 3212//2881 3227//2894 3224//2887 3205//2872
f 3219//2885 3228//2891 3213//2880 3201//2867
f 3215//2912 3216//2913 3189//2856 3188//2859
f 3216//2913 3217//2914 3193//2863 3189//2856
f 2896//2607 3077//2773 3078//2776 2897//2608
f 2902//2611 3083//2780 3084//2779 2903//2612
f 3081//2777 3083//2780 2902//2611 2901//2617
f 2897//2608 3078//2776 3081//2777 2901//2617
f 3104//2806 3105//2805 2917//2627 2916//2626
f 3108//2807 3109//885 2921//885 2920//2630
f 3105//2805 3108//2807 2920//2630 2917//2627
f 3084//2779 3104//2806 2916//2626 2903//2612
f 3184//2855 3185//2854 3041//2739 3040//2738
f 3047//2742 3194//2860 3193//2863 3046//2743
f 3192//2865 3194//2860 3047//2742 3045//2745
f 3185//2854 3192//2865 3045//2745 3041//2739
f 3059//2756 3216//2913 3215//2912 3058//2757
f 3062//2761 3217//2914 3216//2913 3059//2756
f 3193//2863 3217//2914 3062//2761 3046//2743
f 2809//885 2924//2632 2922//2635 2807//2384
f 2817//885 2939//2647 2937//2650 2815//885
f 2815//885 2937//2650 2924//2632 2809//885
f 2842//885 2959//885 2957//885 2840//885
f 2852//2564 2967//885 2965//885 2850//2565
f 2850//2565 2965//885 2959//885 2842//885
f 2840//885 2957//885 2939//2647 2817//885
f 2874//2587 2993//885 2991//885 2872//2588
f 2884//899 3001//885 2999//885 2882//2597
f 2882//2597 2999//885 2993//885 2874//2587
f 2913//885 3032//885 3030//885 2911//885
f 2921//885 3040//2738 3038//951 2919//885
f 2919//885 3038//951 3032//885 2913//885
f 2911//885 3030//885 3001//885 2884//899
f 2872//2588 2991//885 2967//885 2852//2564
f 3111//885 3186//2852 3184//2855 3109//885
f 3119//2811 3200//2866 3198//2869 3117//2812
f 3117//2812 3198//2869 3186//2852 3111//885
f 3233//2898 3234//2897 3177//2827 3176//1475
f 3163//2846 3220//2883 3218//2886 3161//2847
f 3240//2904 3241//2903 3183//2850 3182//2849
f 3183//2850 3241//2903 3237//2907 3179//2851
f 3234//2897 3240//2904 3182//2849 3177//2827
f 3179//2851 3237//2907 3220//2883 3163//2846
f 3161//2847 3218//2886 3200//2866 3119//2811
f 3109//885 3184//2855 3040//2738 2921//885
f 2703//2453 2772//2498 2773//2497 2704//2454
f 2710//2431 2779//2501 2780//2504 2711//2432
f 2778//2523 2779//2501 2710//2431 2708//2434
f 2785//2508 2786//2507 2715//2439 2714//2438
f 2704//2454 2773//2497 2778//2523 2708//2434
f 2780//2504 2785//2508 2714//2438 2711//2432
f 2802//2528 2803//2527 2727//885 2726//2448
f 2806//885 2807//2384 2731//2450 2730//885
f 2803//2527 2806//885 2730//885 2727//885
f 2786//2507 2802//2528 2726//2448 2715//2439
f 2922//2635 2923//2634 2760//2476 2759//2475
f 2766//2481 2927//2636 2926//2639 2765//2482
f 2770//2486 2931//2641 2930//2640 2769//2487
f 2930//2640 2932//2643 2771//2492 2769//2487
f 2771//2492 2932//2643 2927//2636 2766//2481
f 2923//2634 2931//2641 2770//2486 2760//2476
f 2807//2384 2922//2635 2759//2475 2731//2450
f 120//119 121//118 1654//1489 1653//1488
f 117//121 1651//1492 1654//1489 121//118
f 124//125 125//124 1658//1495 1657//1494
f 117//121 124//125 1657//1494 1651//1492
f 152//150 1686//1523 1688//1526 154//151
f 160//142 1694//1531 1696//142 162//142
f 154//151 1688//1526 1694//1531 160//142
f 120//119 1653//1488 1686//1523 152//150
f 267//142 1768//142 1770//1600 269//241
f 1778//1606 1779//1670 278//299 277//249
f 275//248 1776//1603 1778//1606 277//249
f 269//241 1770//1600 1776//1603 275//248
f 1805//1628 1806//1627 326//295 325//294
f 1802//1623 1805//1628 325//294 322//291
f 278//299 1779//1670 1802//1623 322//291
f 162//142 1696//142 1768//142 267//142
f 943//863 944//862 2450//2202 2449//2201
f 949//867 950//866 2456//2206 2455//2205
f 949//867 2455//2205 2453//2210 946//868
f 944//862 946//868 2453//2210 2450//2202
f 979//894 2486//2236 2484//2239 977//895
f 987//885 2494//885 2492//2245 985//885
f 985//885 2492//2245 2486//2236 979//894
f 977//895 2484//2239 2456//2206 950//866
f 1094//985 2568//2312 2566//885 1092//885
f 2576//2383 2577//2316 1103//991 1102//1042
f 1103//991 2577//2316 2574//2319 1100//992
f 1100//992 2574//2319 2568//2312 1094//985
f 2599//2337 2600//2336 1147//1034 1146//1033
f 2600//2336 2603//2341 1150//1037 1147//1034
f 1150//1037 2603//2341 2576//2383 1102//1042
f 1092//885 2566//885 2494//885 987//885
f 9//6 828//745 830//748 11//7
f 7//10 11//7 830//748 826//749
f 16//15 18//14 839//757 837//756
f 35//30 853//767 855//770 37//31
f 35//30 39//34 857//771 853//767
f 16//15 837//756 844//786 27//42
f 18//14 37//31 855//770 839//757
f 9//6 27//42 844//786 828//745
f 54//49 873//788 875//791 56//50
f 52//53 56//50 875//791 871//792
f 45//55 869//798 873//788 54//49
f 61//58 882//801 884//804 63//59
f 72//69 889//805 891//808 74//70
f 72//69 76//73 893//809 889//805
f 63//59 884//804 893//809 76//73
f 61//58 85//89 902//829 882//801
f 52//53 871//792 902//829 85//89
f 93//91 915//834 917//837 95//92
f 101//99 921//838 923//841 103//100
f 95//92 917//837 921//838 101//99
f 111//111 929//848 931//851 113//112
f 111//111 115//115 933//852 929//848
f 123//123 941//860 943//863 125//124
f 113//112 931//851 941//860 123//123
f 103//100 923//841 933//852 115//115
f 93//91 133//157 951//900 915//834
f 171//166 988//902 990//905 173//167
f 171//166 175//170 992//906 988//902
f 175//170 188//185 1007//927 992//906
f 297//265 1114//1000 1112//1003 295//266
f 305//269 1125//1011 1123//1014 303//270
f 1123//1014 1127//1016 307//272 303//270
f 295//266 1112//1003 1104//1018 286//277
f 1104//1018 1125//1011 305//269 286//277
f 316//285 1135//1023 1133//1026 314//286
f 1133//1026 1137//1028 318//288 314//286
f 326//295 1146//1033 1144//1036 324//296
f 324//296 1144//1036 1135//1023 316//285
f 318//288 1137//1028 1114//1000 297//265
f 74//70 891//808 951//900 133//157
f 307//272 1127//1016 1062//1044 245//300
f 45//55 173//167 990//905 869//798
f 7//10 826//749 1007//927 188//185
f 334//305 336//304 1157//1046 1155//1045
f 329//307 334//305 1155//1045 1152//1049
f 345//321 347//320 1164//1055 1162//1054
f 367//343 369//342 1189//1080 1187//1079
f 375//349 1195//1087 1197//1090 377//350
f 375//349 379//353 1199//1091 1195//1087
f 369//342 377//350 1197//1090 1189//1080
f 329//307 1152//1049 1164//1055 347//320
f 336//304 367//343 1187//1079 1157//1046
f 404//377 407//376 1225//1112 1222//1111
f 419//383 1238//1121 1236//1124 417//384
f 414//387 417//384 1236//1124 1233//1125
f 407//376 414//387 1233//1125 1225//1112
f 441//410 443//409 1263//1147 1261//1146
f 449//418 451//417 1271//1155 1269//1154
f 443//409 449//418 1269//1154 1263//1147
f 419//383 441//410 1261//1146 1238//1121
f 379//353 404//377 1222//1111 1199//1091
f 500//451 1320//1193 1318//1196 498//452
f 1318//1196 1322//1198 502//454 498//452
f 515//464 1332//1199 1330//1202 513//465
f 1328//1204 1332//1199 515//464 511//467
f 502//454 1322//1198 1310//1213 492//469
f 1310//1213 1328//1204 511//467 492//469
f 1360//1237 1362//1236 542//496 540//495
f 1368//1245 1370//1244 548//500 546//499
f 1362//1236 1368//1245 546//499 542//496
f 1330//1202 1360//1237 540//495 513//465
f 1394//1271 1396//1270 574//526 572//525
f 1400//1275 1402//1274 580//530 578//529
f 1396//1270 1400//1275 578//529 574//526
f 1424//1297 1426//1296 605//552 603//551
f 612//560 1431//1298 1433//1301 614//561
f 1433//1301 1436//1303 617//563 614//561
f 1426//1296 1431//1298 612//560 605//552
f 1402//1274 1424//1297 603//551 580//530
f 1370//1244 1394//1271 572//525 548//500
f 621//573 623//572 1445//1314 1443//1313
f 644//596 646//595 1463//1330 1461//1329
f 631//602 644//596 1461//1329 1449//1344
f 659//608 1478//1346 1476//1349 657//609
f 659//608 661//612 1480//1350 1478//1346
f 678//627 680//626 1497//1361 1495//1360
f 678//627 1495//1360 1492//1371 669//629
f 661//612 669//629 1492//1371 1480//1350
f 631//602 1449//1344 1445//1314 623//572
f 646//595 657//609 1476//1349 1463//1330
f 686//634 1508//1376 1506//1379 684//635
f 680//626 684//635 1506//1379 1497//1361
f 1528//1396 1530//1395 713//658 711//657
f 730//670 1549//1408 1551//1411 732//671
f 1547//1413 1549//1408 730//670 728//673
f 713//658 1530//1395 1539//1420 716//676
f 1539//1420 1547//1413 728//673 716//676
f 1582//1445 1584//1444 767//707 765//706
f 1551//1411 1582//1445 765//706 732//671
f 791//707 1609//1444 1611//1444 793//707
f 1611//1444 1613//1466 795//728 793//707
f 1606//1444 1609//1444 791//707 783//707
f 801//733 1623//1475 1621//1478 799//734
f 807//733 1629//1475 1627//1475 805//733
f 805//733 1627//1475 1623//1475 801//733
f 813//733 1635//1475 1633//1475 811//733
f 819//733 1641//1475 1639//1475 817//733
f 817//733 1639//1475 1635//1475 813//733
f 811//733 1633//1475 1629//1475 807//733
f 825//740 1647//1482 1645//1485 823//741
f 767//707 1584//1444 1606//1444 783//707
f 823//741 1645//1485 1641//1475 819//733
f 1613//1466 1647//1482 825//740 795//728
f 799//734 1621//1478 1508//1376 686//634
f 451//417 621//573 1443//1313 1271//1155
f 1436//1303 1528//1396 711//657 617//563
f 39//34 345//321 1162//1054 857//771
f 1062//1044 1320//1193 500//451 245//300
f 1658//1495 2449//2201 2451//2204 1660//1496
f 1667//1503 2459//2211 2461//2214 1669//1504
f 2461//2214 2464//2216 1672//1506 1669//1504
f 1660//1496 2451//2204 2459//2211 1667//1503
f 1678//1515 2471//2223 2473//2226 1680//1516
f 1683//1519 2479//2231 2481//2234 1685//1520
f 1680//1516 2473//2226 2479//2231 1683//1519
f 1672//1506 2464//2216 2471//2223 1678//1515
f 2481//2234 2506//2268 1715//1555 1685//1520
f 1732//1564 2522//2269 2524//2272 1734//1565
f 2524//2272 2526//2274 1736//1567 1734//1565
f 1741//1567 2535//2274 2537//2284 1743//1570
f 1736//1567 2526//2274 2535//2274 1741//1567
f 2537//2284 2546//2297 1756//1586 1743//1570
f 1765//1593 2557//2301 2559//2304 1767//1594
f 2555//2306 2557//2301 1765//1593 1763//1596
f 1756//1586 2546//2297 2555//2306 1763//1596
f 1808//1626 2601//2334 2599//2337 1806//1627
f 1817//1634 2609//2342 2607//2345 1815//1635
f 1817//1634 1819//1638 2611//2346 2609//2342
f 1815//1635 2607//2345 2601//2334 1808//1626
f 1830//1648 2620//2353 2618//2356 1828//1649
f 1847//1660 2639//2368 2637//2371 1845//1661
f 1847//1660 1849//1664 2641//2372 2639//2368
f 1845//1661 2637//2371 2634//2378 1838//1666
f 1830//1648 1838//1666 2634//2378 2620//2353
f 1828//1649 2618//2356 2611//2346 1819//1638
f 1882//1692 2673//2398 2675//2401 1884//1693
f 2671//2403 2673//2398 1882//1692 1880//1695
f 1872//1711 2664//2422 2671//2403 1880//1695
f 2675//2401 2687//2421 1896//1707 1884//1693
f 1715//1555 2506//2268 2522//2269 1732//1564
f 1913//1741 2703//2453 2641//2372 1849//1664
f 2559//2304 2664//2422 1872//1711 1767//1594
f 1941//1743 2734//2455 2736//2458 1943//1744
f 2732//2460 2734//2455 1941//1743 1939//1746
f 2742//2467 2744//2466 1954//1759 1952//1758
f 1971//1771 2763//2479 2765//2482 1973//1772
f 2761//2484 2763//2479 1971//1771 1969//1774
f 1954//1759 2744//2466 2753//2491 1957//1774
f 2753//2491 2761//2484 1969//1774 1957//1774
f 2736//2458 2742//2467 1952//1758 1943//1744
f 1896//1707 2687//2421 2732//2460 1939//1746
f 1982//1786 2774//2495 2772//2498 1980//1787
f 1982//1786 1984//1790 2776//2499 2774//2495
f 2000//1805 2002//1804 2792//2510 2790//2509
f 1991//1808 2783//2520 2776//2499 1984//1790
f 1991//1808 2000//1805 2790//2509 2783//2520
f 2027//1826 2820//2535 2818//2538 2025//1827
f 2027//1826 2029//1830 2822//2539 2820//2535
f 2033//1834 2035//1833 2830//2546 2828//2545
f 2029//1830 2033//1834 2828//2545 2822//2539
f 2002//1804 2025//1827 2818//2538 2792//2510
f 2058//1857 2060//1856 2855//2569 2853//2568
f 2064//1861 2066//1860 2861//2573 2859//2572
f 2060//1856 2064//1861 2859//2572 2855//2569
f 2091//1888 2093//1887 2887//2600 2885//2599
f 2100//1894 2892//2603 2894//2606 2102//1895
f 2100//1894 2104//1898 2896//2607 2892//2603
f 2093//1887 2102//1895 2894//2606 2887//2600
f 2066//1860 2091//1888 2885//2599 2861//2573
f 2035//1833 2058//1857 2853//2568 2830//2546
f 2926//2639 2928//2638 2138//1930 2136//1929
f 2950//2660 2952//2659 2158//1944 2156//1943
f 2947//2662 2950//2660 2156//1943 2151//1947
f 2973//2681 2975//2680 2182//1969 2180//1968
f 2190//1977 2983//2686 2985//2689 2192//1978
f 2981//2691 2983//2686 2190//1977 2188//1980
f 2975//2680 2981//2691 2188//1980 2182//1969
f 2138//1930 2928//2638 2947//2662 2151//1947
f 2952//2659 2973//2681 2180//1968 2158//1944
f 3008//2712 3010//2711 2219//2002 2217//2001
f 2231//2010 3023//2719 3021//2722 2229//2011
f 3019//2724 3023//2719 2231//2010 2227//2013
f 3010//2711 3019//2724 2227//2013 2219//2002
f 3048//2750 3050//2749 2257//2038 2255//2037
f 3056//2758 3058//2757 2264//2042 2262//2041
f 3050//2749 3056//2758 2262//2041 2257//2038
f 3021//2722 3048//2750 2255//2037 2229//2011
f 2985//2689 3008//2712 2217//2001 2192//1978
f 2273//2055 2275//2054 3068//2763 3066//2762
f 2267//2057 2273//2055 3066//2762 3063//2770
f 2287//2069 2289//2068 3079//2774 3077//2773
f 2298//2075 3090//2784 3092//2787 2300//2076
f 2296//2079 2300//2076 3092//2787 3088//2788
f 2278//2085 3074//2798 3079//2774 2289//2068
f 2278//2085 2296//2079 3088//2788 3074//2798
f 2330//2108 2332//2108 3122//2770 3120//2813
f 2347//733 3137//1475 3135//2829 2345//2120
f 2357//733 3148//1475 3146//1475 2355//733
f 2355//733 3146//1475 3137//1475 2347//733
f 2375//733 3166//1475 3164//1475 2373//733
f 2385//733 3176//1475 3174//1475 2383//733
f 2383//733 3174//1475 3166//1475 2375//733
f 2373//733 3164//1475 3148//1475 2357//733
f 2298//2075 2330//2108 3120//2813 3090//2784
f 2267//2057 3063//2770 3122//2770 2332//2108
f 2345//2120 3135//2829 3068//2763 2275//2054
f 3188//2859 3190//2858 2399//2149 2397//2148
f 2416//2164 3206//2870 3204//2873 2414//2165
f 3202//2875 3206//2870 2416//2164 2412//2167
f 3190//2858 3202//2875 2412//2167 2399//2149
f 3223//2890 3225//2889 2432//2178 2430//2177
f 2445//2189 3235//2895 3233//2898 2443//2190
f 3231//2900 3235//2895 2445//2189 2441//2192
f 2448//2195 3244//2910 3231//2900 2441//2192
f 3225//2889 3244//2910 2448//2195 2432//2178
f 2419//2199 3215//2912 3188//2859 2397//2148
f 3204//2873 3223//2890 2430//2177 2414//2165
f 2443//2190 3233//2898 3176//1475 2385//733
f 2104//1898 2287//2069 3077//2773 2896//2607
f 3058//2757 3215//2912 2419//2199 2264//2042
f 1913//1741 1980//1787 2772//2498 2703//2453
f 2765//2482 2926//2639 2136//1929 1973//1772
f 125//124 943//863 2449//2201 1658//1495
f 1806//1627 2599//2337 1146//1033 326//295
