# Supplementary material
Source: ML conference proceedings conference paper supplement (https://openaccess.thecvf.com/content/WACV2023/html/Plack_Fast_Differentiable_Transient_WACV_2023_paper.html)
Supplement: Supplementary file 2 [file Plack_Fast_Differentiable_Transient_WACV_2023_supplemental.zip › code/samples/wacv/self_supervised/v.obj]

# Blender v3.2.1 OBJ File: 'untitled.blend'
# www.blender.org
v 0.107505 -0.095748 0.337350
v 0.108063 -0.097049 0.328603
v 0.108328 -0.097669 0.315500
v 0.107214 -0.081967 0.348661
v 0.108922 -0.086934 0.341712
v 0.108765 -0.074730 0.349841
v 0.113856 -0.074730 0.341705
v 0.120339 -0.068918 0.326247
v 0.120497 -0.069288 0.315500
v 0.112015 -0.087833 0.328603
v 0.112546 -0.087833 0.315500
v 0.117920 -0.073864 0.329810
v 0.117688 -0.075839 0.315500
v 0.134338 -0.031702 0.338214
v 0.134047 -0.017921 0.349202
v 0.136257 -0.022301 0.342231
v 0.135210 -0.033736 0.328603
v 0.135476 -0.034356 0.315500
v 0.140105 -0.022321 0.328603
v 0.140636 -0.022321 0.315500
v 0.121857 -0.059357 0.339070
v 0.121567 -0.045576 0.349584
v 0.124275 -0.049377 0.342744
v 0.111574 -0.061628 0.351617
v 0.118482 -0.062886 0.342744
v 0.114584 -0.049377 0.352585
v 0.119694 -0.054311 0.347805
v 0.122627 -0.062886 0.329810
v 0.123782 -0.061628 0.315500
v 0.128869 -0.048526 0.328603
v 0.129400 -0.048526 0.315500
v 0.119985 -0.068092 0.334982
v 0.123743 -0.035423 0.351109
v 0.130465 -0.035811 0.342231
v 0.127313 -0.022301 0.352110
v 0.132174 -0.026656 0.346949
v 0.113471 -0.035423 0.356037
v 0.113471 -0.022321 0.357548
v 0.132401 -0.040287 0.328603
v 0.132666 -0.040907 0.315500
v 0.028877 -0.279150 0.337332
v 0.029430 -0.280438 0.328603
v 0.029696 -0.281058 0.315500
v 0.017979 -0.279693 0.349889
v 0.022110 -0.282062 0.341702
v 0.008652 -0.280631 0.350705
v 0.008652 -0.286429 0.341705
v 0.021755 -0.286479 0.328603
v 0.021755 -0.287344 0.315500
v 0.008652 -0.289899 0.328603
v 0.008652 -0.290388 0.315500
v 0.028587 -0.265370 0.348643
v 0.030284 -0.270348 0.341702
v 0.030132 -0.258163 0.349822
v 0.035203 -0.258163 0.341705
v 0.041713 -0.252322 0.326188
v 0.041865 -0.252677 0.315500
v 0.033362 -0.271265 0.328603
v 0.033895 -0.271265 0.315500
v 0.039283 -0.257279 0.329774
v 0.039056 -0.259228 0.315500
v 0.043231 -0.242760 0.339053
v 0.042940 -0.228979 0.349576
v 0.045637 -0.232791 0.342734
v 0.032941 -0.245061 0.351609
v 0.039845 -0.246301 0.342734
v 0.035962 -0.232791 0.352577
v 0.041067 -0.237714 0.347787
v 0.043991 -0.246301 0.329774
v 0.045130 -0.245061 0.315500
v 0.050217 -0.231958 0.328603
v 0.050748 -0.231958 0.315500
v 0.041358 -0.251495 0.334922
v 0.022110 -0.270348 0.351198
v 0.026714 -0.274105 0.346067
v 0.021755 -0.258163 0.354405
v 0.008652 -0.271265 0.355325
v 0.008652 -0.258163 0.357887
v 0.021755 -0.245061 0.356621
v 0.021755 -0.231958 0.357851
v 0.008652 -0.245061 0.358451
v 0.008652 -0.231958 0.358624
v -0.004450 -0.280631 0.350705
v -0.004450 -0.286429 0.341705
v -0.015276 -0.279693 0.349889
v -0.018807 -0.283580 0.342939
v -0.004450 -0.289899 0.328603
v -0.004450 -0.290388 0.315500
v -0.017553 -0.289899 0.328603
v -0.017553 -0.290388 0.315500
v -0.026168 -0.281681 0.339394
v -0.027464 -0.283858 0.328603
v -0.027729 -0.284102 0.315500
v -0.004450 -0.271265 0.355528
v -0.004450 -0.258163 0.358263
v -0.018807 -0.272443 0.352000
v -0.024011 -0.277596 0.348129
v -0.017553 -0.258163 0.356239
v -0.004450 -0.245061 0.358624
v -0.004450 -0.231958 0.358624
v -0.017553 -0.245061 0.357646
v -0.017553 -0.231958 0.358232
v -0.025846 -0.268862 0.349708
v -0.028726 -0.272443 0.342939
v -0.028093 -0.258163 0.351282
v -0.034875 -0.258803 0.342361
v -0.038572 -0.254862 0.338430
v -0.033576 -0.271265 0.328603
v -0.034107 -0.271265 0.315500
v -0.036767 -0.263670 0.328603
v -0.037032 -0.264301 0.315500
v -0.039519 -0.257118 0.328603
v -0.039784 -0.257750 0.315500
v -0.031491 -0.245241 0.352234
v -0.036416 -0.249729 0.347165
v -0.030655 -0.231958 0.355428
v -0.038250 -0.240994 0.349278
v -0.040572 -0.245241 0.342361
v -0.040148 -0.231958 0.350637
v -0.046721 -0.231601 0.341782
v -0.044584 -0.245061 0.328603
v -0.045114 -0.245061 0.315500
v -0.048822 -0.234972 0.328603
v -0.049087 -0.235602 0.315500
v -0.050975 -0.226995 0.337467
v -0.051574 -0.228420 0.328603
v -0.051839 -0.229051 0.315500
v 0.055711 -0.215105 0.338197
v 0.055420 -0.201324 0.349194
v 0.057620 -0.205716 0.342221
v 0.056577 -0.217125 0.328603
v 0.056843 -0.217745 0.315500
v 0.061453 -0.205754 0.328603
v 0.061985 -0.205754 0.315500
v 0.068191 -0.187449 0.337341
v 0.067900 -0.173668 0.348652
v 0.069603 -0.178641 0.341707
v 0.057279 -0.192651 0.350525
v 0.063810 -0.192150 0.341707
v 0.061421 -0.178641 0.351477
v 0.066028 -0.182403 0.346076
v 0.068746 -0.188744 0.328603
v 0.069012 -0.189364 0.315500
v 0.072689 -0.179549 0.328603
v 0.073220 -0.179549 0.315500
v 0.065937 -0.195295 0.328603
v 0.066203 -0.195915 0.315500
v 0.082544 -0.151059 0.339061
v 0.081026 -0.160620 0.326217
v 0.081181 -0.160983 0.315500
v 0.083309 -0.154593 0.329792
v 0.084456 -0.153344 0.315500
v 0.095024 -0.123403 0.338205
v 0.082253 -0.137278 0.349579
v 0.084956 -0.141084 0.342739
v 0.084427 -0.127140 0.351103
v 0.091146 -0.127518 0.342226
v 0.095894 -0.125430 0.328603
v 0.096159 -0.126050 0.315500
v 0.089542 -0.140242 0.328603
v 0.090074 -0.140242 0.315500
v 0.093084 -0.131982 0.328603
v 0.093350 -0.132601 0.315500
v 0.069448 -0.166447 0.349832
v 0.074530 -0.166447 0.341705
v 0.072258 -0.153344 0.351613
v 0.079164 -0.154593 0.342739
v 0.061061 -0.166447 0.354416
v 0.061061 -0.153344 0.356625
v 0.078602 -0.165571 0.329792
v 0.078372 -0.167534 0.315500
v 0.080671 -0.159793 0.334952
v 0.075273 -0.141084 0.352581
v 0.080380 -0.146013 0.347796
v 0.074164 -0.127140 0.356030
v 0.061061 -0.140242 0.357853
v 0.061061 -0.127140 0.358367
v 0.045110 -0.218856 0.351098
v 0.051828 -0.219225 0.342221
v 0.048692 -0.205716 0.352099
v 0.053547 -0.210059 0.346932
v 0.034857 -0.218856 0.356023
v 0.034857 -0.205754 0.357540
v 0.053768 -0.223676 0.328603
v 0.054034 -0.224296 0.315500
v 0.047959 -0.192651 0.355279
v 0.047959 -0.179549 0.357083
v 0.034857 -0.192651 0.358195
v 0.034857 -0.179549 0.358538
v 0.021755 -0.218856 0.358366
v 0.021755 -0.205754 0.358623
v 0.008652 -0.218856 0.358624
v 0.008652 -0.205754 0.358624
v 0.021755 -0.192651 0.358624
v 0.021755 -0.179549 0.358624
v 0.008652 -0.192651 0.358624
v 0.008652 -0.179549 0.358624
v 0.047959 -0.166447 0.358024
v 0.047959 -0.153344 0.358452
v 0.034857 -0.166447 0.358624
v 0.034857 -0.153344 0.358624
v 0.047959 -0.140242 0.358624
v 0.047959 -0.127140 0.358624
v 0.034857 -0.140242 0.358624
v 0.034857 -0.127140 0.358624
v 0.021755 -0.166447 0.358624
v 0.021755 -0.153344 0.358624
v 0.008652 -0.166447 0.358624
v 0.008652 -0.153344 0.358624
v 0.021755 -0.140242 0.358624
v 0.021755 -0.127140 0.358624
v 0.008652 -0.140242 0.358624
v 0.008652 -0.127140 0.358624
v 0.094733 -0.109622 0.349198
v 0.096939 -0.114009 0.342226
v 0.096596 -0.100935 0.350531
v 0.103129 -0.100443 0.341712
v 0.088002 -0.114009 0.352105
v 0.092861 -0.118357 0.346940
v 0.087266 -0.100935 0.355287
v 0.100779 -0.114037 0.328603
v 0.101310 -0.114037 0.315500
v 0.105254 -0.103601 0.328603
v 0.105520 -0.104220 0.315500
v 0.100732 -0.086934 0.351485
v 0.105341 -0.090702 0.346085
v 0.100368 -0.074730 0.354427
v 0.087266 -0.087833 0.357087
v 0.087266 -0.074730 0.358026
v 0.074164 -0.114037 0.357544
v 0.074164 -0.100935 0.358196
v 0.061061 -0.114037 0.358624
v 0.061061 -0.100935 0.358624
v 0.074164 -0.087833 0.358538
v 0.074164 -0.074730 0.358624
v 0.061061 -0.087833 0.358624
v 0.061061 -0.074730 0.358624
v 0.100368 -0.061628 0.356630
v 0.100368 -0.048526 0.357855
v 0.087266 -0.061628 0.358453
v 0.087266 -0.048526 0.358624
v 0.100368 -0.035423 0.358368
v 0.100368 -0.022321 0.358624
v 0.087266 -0.035423 0.358624
v 0.087266 -0.022321 0.358624
v 0.074164 -0.061628 0.358624
v 0.074164 -0.048526 0.358624
v 0.061061 -0.061628 0.358624
v 0.061061 -0.048526 0.358624
v 0.074164 -0.035423 0.358624
v 0.074164 -0.022321 0.358624
v 0.061061 -0.035423 0.358624
v 0.061061 -0.022321 0.358624
v 0.047959 -0.114037 0.358624
v 0.047959 -0.100935 0.358624
v 0.034857 -0.114037 0.358624
v 0.034857 -0.100935 0.358624
v 0.047959 -0.087833 0.358624
v 0.047959 -0.074730 0.358624
v 0.034857 -0.087833 0.358624
v 0.034857 -0.074730 0.358624
v 0.021755 -0.114037 0.358624
v 0.021755 -0.100935 0.358624
v 0.008652 -0.114037 0.358538
v 0.008652 -0.100935 0.358197
v 0.021755 -0.087833 0.358624
v 0.021755 -0.074730 0.358368
v 0.008652 -0.087833 0.357548
v 0.008652 -0.074730 0.356039
v 0.047959 -0.061628 0.358624
v 0.047959 -0.048526 0.358624
v 0.034857 -0.061628 0.358624
v 0.034857 -0.048526 0.358455
v 0.047959 -0.035423 0.358624
v 0.047959 -0.022321 0.358541
v 0.034857 -0.035423 0.358029
v 0.034857 -0.022321 0.357100
v 0.021755 -0.061628 0.357856
v 0.021755 -0.048526 0.356637
v 0.007535 -0.060769 0.352587
v 0.002423 -0.055829 0.347813
v 0.010537 -0.048526 0.351623
v 0.003626 -0.047256 0.342750
v 0.002130 -0.042042 0.335020
v 0.021755 -0.035423 0.354449
v 0.021381 -0.023200 0.351504
v 0.016765 -0.019420 0.346107
v 0.013341 -0.035423 0.349860
v 0.008235 -0.035423 0.341705
v 0.014896 -0.028155 0.348679
v 0.013177 -0.023200 0.341726
v 0.004184 -0.036277 0.329833
v 0.004416 -0.034283 0.315500
v 0.010067 -0.022321 0.328603
v 0.009536 -0.022321 0.315500
v -0.004450 -0.218856 0.358624
v -0.004450 -0.205754 0.358624
v -0.017553 -0.218856 0.358554
v -0.017553 -0.205754 0.358624
v -0.004450 -0.192651 0.358624
v -0.004450 -0.179549 0.358624
v -0.017553 -0.192651 0.358624
v -0.017553 -0.179549 0.358624
v -0.030655 -0.218856 0.357158
v -0.030655 -0.205754 0.358039
v -0.044174 -0.218039 0.351572
v -0.048819 -0.221862 0.346201
v -0.043757 -0.205754 0.354505
v -0.030655 -0.192651 0.358458
v -0.030655 -0.179549 0.358624
v -0.043757 -0.192651 0.356643
v -0.043757 -0.179549 0.357847
v -0.004450 -0.166447 0.358624
v -0.004450 -0.153344 0.358624
v -0.017553 -0.166447 0.358624
v -0.017553 -0.153344 0.358624
v -0.004450 -0.140242 0.358624
v -0.004450 -0.127140 0.358624
v -0.017553 -0.140242 0.358624
v -0.017553 -0.127140 0.358624
v -0.030655 -0.166447 0.358624
v -0.030655 -0.153344 0.358624
v -0.043757 -0.166447 0.358352
v -0.043757 -0.153344 0.358614
v -0.030655 -0.140242 0.358624
v -0.030655 -0.127140 0.358624
v -0.043757 -0.140242 0.358624
v -0.043757 -0.127140 0.358624
v -0.050654 -0.213127 0.348733
v -0.052417 -0.218039 0.341782
v -0.052203 -0.205754 0.349905
v -0.057331 -0.205754 0.341705
v -0.055592 -0.218856 0.328603
v -0.056122 -0.218856 0.315500
v -0.061365 -0.204904 0.329826
v -0.061142 -0.206904 0.315500
v -0.063733 -0.199969 0.326275
v -0.063894 -0.200353 0.315500
v -0.054955 -0.192651 0.351625
v -0.061868 -0.193917 0.342723
v -0.057958 -0.180355 0.352557
v -0.063058 -0.185260 0.347769
v -0.065214 -0.190393 0.339034
v -0.064893 -0.176525 0.349548
v -0.067565 -0.180355 0.342723
v -0.063380 -0.199128 0.335010
v -0.065980 -0.193917 0.329826
v -0.067129 -0.192651 0.315500
v -0.072103 -0.179549 0.328603
v -0.072633 -0.179549 0.315500
v -0.056859 -0.166447 0.355954
v -0.056859 -0.153344 0.357481
v -0.067009 -0.166447 0.351041
v -0.073714 -0.166715 0.342145
v -0.070641 -0.153153 0.352013
v -0.075462 -0.157393 0.346806
v -0.075684 -0.171024 0.328603
v -0.075949 -0.171655 0.315500
v -0.056859 -0.140242 0.358160
v -0.056859 -0.127140 0.358518
v -0.069962 -0.140242 0.355116
v -0.069962 -0.127140 0.356966
v -0.077618 -0.162526 0.338071
v -0.077296 -0.148658 0.349118
v -0.079410 -0.153153 0.342145
v -0.078436 -0.164473 0.328603
v -0.078701 -0.165104 0.315500
v -0.083110 -0.153344 0.328603
v -0.083641 -0.153344 0.315500
v -0.079064 -0.140242 0.350396
v -0.085559 -0.139513 0.341526
v -0.083325 -0.125951 0.351232
v -0.087866 -0.129526 0.345774
v -0.090022 -0.134659 0.337039
v -0.089701 -0.120791 0.348374
v -0.091256 -0.125951 0.341526
v -0.087739 -0.142326 0.328603
v -0.088004 -0.142957 0.315500
v -0.090491 -0.135775 0.328603
v -0.090756 -0.136406 0.315500
v -0.094118 -0.127140 0.328603
v -0.094648 -0.127140 0.315500
v -0.004450 -0.114037 0.358538
v -0.004450 -0.100935 0.358197
v -0.017553 -0.114037 0.358624
v -0.017553 -0.100935 0.358624
v -0.004450 -0.087833 0.357479
v -0.004450 -0.074730 0.355902
v -0.017553 -0.087833 0.358555
v -0.017553 -0.074730 0.358231
v -0.030655 -0.114037 0.358624
v -0.030655 -0.100935 0.358624
v -0.043757 -0.114037 0.358624
v -0.043757 -0.100935 0.358624
v -0.030655 -0.087833 0.358624
v -0.030655 -0.074730 0.358624
v -0.043757 -0.087833 0.358624
v -0.043757 -0.074730 0.358624
v -0.003631 -0.060769 0.352404
v 0.001283 -0.055829 0.347813
v -0.007073 -0.048526 0.351239
v -0.000308 -0.047256 0.342750
v -0.017553 -0.061628 0.357628
v -0.017553 -0.048526 0.356188
v 0.001583 -0.042042 0.335020
v -0.009312 -0.038009 0.349673
v -0.006485 -0.034354 0.342874
v -0.009412 -0.022321 0.338702
v -0.016345 -0.034354 0.352673
v -0.011173 -0.029274 0.348020
v -0.019204 -0.022321 0.351719
v -0.012653 -0.022321 0.345253
v -0.000851 -0.036277 0.329833
v -0.000934 -0.034283 0.315500
v -0.007291 -0.022321 0.328603
v -0.006759 -0.022321 0.315500
v -0.030655 -0.061628 0.358624
v -0.030655 -0.048526 0.358389
v -0.043757 -0.061628 0.358624
v -0.043757 -0.048526 0.358624
v -0.030655 -0.035423 0.357898
v -0.030655 -0.022321 0.356756
v -0.043757 -0.035423 0.358624
v -0.043757 -0.022321 0.358477
v -0.056859 -0.114037 0.358624
v -0.056859 -0.100935 0.358624
v -0.069962 -0.114037 0.357968
v -0.069962 -0.100935 0.358422
v -0.056859 -0.087833 0.358624
v -0.056859 -0.074730 0.358624
v -0.069962 -0.087833 0.358624
v -0.069962 -0.074730 0.358624
v -0.083064 -0.114037 0.354043
v -0.083064 -0.100935 0.356428
v -0.091119 -0.114037 0.349516
v -0.095857 -0.114037 0.341705
v -0.093871 -0.100935 0.351446
v -0.100707 -0.101829 0.342508
v -0.100204 -0.112815 0.329103
v -0.100059 -0.114258 0.315500
v -0.102426 -0.106792 0.333803
v -0.083064 -0.087833 0.357753
v -0.083064 -0.074730 0.358281
v -0.097109 -0.088267 0.352385
v -0.102105 -0.092924 0.347410
v -0.096167 -0.074730 0.355641
v -0.056859 -0.061628 0.358624
v -0.056859 -0.048526 0.358624
v -0.069962 -0.061628 0.358624
v -0.069962 -0.048526 0.358624
v -0.056859 -0.035423 0.358624
v -0.056859 -0.022321 0.358624
v -0.069962 -0.035423 0.358624
v -0.069962 -0.022321 0.358624
v -0.083064 -0.061628 0.358578
v -0.083064 -0.048526 0.358624
v -0.096167 -0.061628 0.357289
v -0.096167 -0.048526 0.358088
v -0.083064 -0.035423 0.358624
v -0.083064 -0.022321 0.358624
v -0.096167 -0.035423 0.358482
v -0.096167 -0.022321 0.358624
v -0.104261 -0.098057 0.338675
v -0.102780 -0.107634 0.325069
v -0.102811 -0.107707 0.315500
v -0.104819 -0.101829 0.329103
v -0.105656 -0.100935 0.315500
v -0.103939 -0.084189 0.349388
v -0.106403 -0.088267 0.342508
v -0.105926 -0.074730 0.350801
v -0.112552 -0.074627 0.341930
v -0.116665 -0.070190 0.337712
v -0.110629 -0.087833 0.328603
v -0.111159 -0.087833 0.315500
v -0.114600 -0.078378 0.328603
v -0.114866 -0.079009 0.315500
v -0.117352 -0.071827 0.328603
v -0.117617 -0.072458 0.315500
v -0.109792 -0.061065 0.351792
v -0.114509 -0.065057 0.346447
v -0.109269 -0.048526 0.354804
v -0.116343 -0.056322 0.348958
v -0.118249 -0.061065 0.341930
v -0.117981 -0.048526 0.350156
v -0.124397 -0.047425 0.340802
v -0.121637 -0.061628 0.328603
v -0.122167 -0.061628 0.315500
v -0.126655 -0.049680 0.328603
v -0.126921 -0.050311 0.315500
v -0.109269 -0.035423 0.356774
v -0.109269 -0.022321 0.357896
v -0.120733 -0.035423 0.351732
v -0.127284 -0.035423 0.345309
v -0.123577 -0.023381 0.352662
v -0.128747 -0.028455 0.348015
v -0.129069 -0.042323 0.335833
v -0.129407 -0.043129 0.328603
v -0.129673 -0.043760 0.315500
v -0.130518 -0.035423 0.338758
v -0.130582 -0.019720 0.349657
v -0.133396 -0.023381 0.342870
v -0.132644 -0.035423 0.328603
v -0.133174 -0.035423 0.315500
v -0.138148 -0.022321 0.328603
v -0.138678 -0.022321 0.315500
v 0.108328 -0.097669 0.302398
v 0.108062 -0.097048 0.289296
v 0.107504 -0.095746 0.280550
v 0.120497 -0.069288 0.302398
v 0.120339 -0.068918 0.291655
v 0.112546 -0.087833 0.302398
v 0.112013 -0.087833 0.289296
v 0.117688 -0.075839 0.302398
v 0.117919 -0.073864 0.288091
v 0.108920 -0.086933 0.276187
v 0.107213 -0.081965 0.269239
v 0.113854 -0.074730 0.276193
v 0.108764 -0.074730 0.268059
v 0.135476 -0.034356 0.302398
v 0.135209 -0.033735 0.289296
v 0.140636 -0.022321 0.302398
v 0.140103 -0.022321 0.289296
v 0.134337 -0.031700 0.279685
v 0.136256 -0.022300 0.275668
v 0.134046 -0.017919 0.268698
v 0.123782 -0.061628 0.302398
v 0.122627 -0.062885 0.288091
v 0.129400 -0.048526 0.302398
v 0.128868 -0.048526 0.289296
v 0.119984 -0.068090 0.282920
v 0.121856 -0.059355 0.278829
v 0.124274 -0.049376 0.275154
v 0.121566 -0.045575 0.268316
v 0.118481 -0.062885 0.275154
v 0.111573 -0.061628 0.266283
v 0.119693 -0.054310 0.270094
v 0.114584 -0.049376 0.265316
v 0.132666 -0.040907 0.302398
v 0.132401 -0.040286 0.289296
v 0.130464 -0.035810 0.275668
v 0.123742 -0.035423 0.266791
v 0.132174 -0.026654 0.270950
v 0.127313 -0.022300 0.265790
v 0.113471 -0.035423 0.261865
v 0.113471 -0.022321 0.260354
v 0.029696 -0.281058 0.302398
v 0.029429 -0.280437 0.289296
v 0.028877 -0.279150 0.280567
v 0.021755 -0.287344 0.302398
v 0.021755 -0.286479 0.289296
v 0.008652 -0.290388 0.302398
v 0.008652 -0.289899 0.289296
v 0.022110 -0.282061 0.276197
v 0.017978 -0.279692 0.268011
v 0.008652 -0.286427 0.276193
v 0.008652 -0.280630 0.267195
v 0.041865 -0.252677 0.302398
v 0.041713 -0.252322 0.291713
v 0.033895 -0.271265 0.302398
v 0.033362 -0.271265 0.289296
v 0.039056 -0.259228 0.302398
v 0.039283 -0.257279 0.288125
v 0.030283 -0.270347 0.276197
v 0.028586 -0.265368 0.269257
v 0.035202 -0.258163 0.276193
v 0.030131 -0.258163 0.268078
v 0.045130 -0.245061 0.302398
v 0.043990 -0.246300 0.288125
v 0.050748 -0.231958 0.302398
v 0.050216 -0.231958 0.289296
v 0.041358 -0.251494 0.282977
v 0.043230 -0.242759 0.278847
v 0.045637 -0.232790 0.275165
v 0.042939 -0.228978 0.268324
v 0.039844 -0.246300 0.275165
v 0.032940 -0.245061 0.266291
v 0.041066 -0.237713 0.270112
v 0.035962 -0.232790 0.265324
v 0.026713 -0.274103 0.271833
v 0.022110 -0.270347 0.266703
v 0.021755 -0.258163 0.263497
v 0.008652 -0.271265 0.262577
v 0.008652 -0.258163 0.260015
v 0.021755 -0.245061 0.261281
v 0.021755 -0.231958 0.260050
v 0.008652 -0.245061 0.259451
v 0.008652 -0.231958 0.259278
v -0.004450 -0.290388 0.302398
v -0.004450 -0.289899 0.289296
v -0.017553 -0.290388 0.302398
v -0.017553 -0.289899 0.289296
v -0.004450 -0.286427 0.276193
v -0.004450 -0.280630 0.267195
v -0.018807 -0.283579 0.274960
v -0.015276 -0.279692 0.268011
v -0.027729 -0.284102 0.302398
v -0.027464 -0.283858 0.289296
v -0.026167 -0.281681 0.278506
v -0.004450 -0.271265 0.262374
v -0.004450 -0.258163 0.259639
v -0.024010 -0.277594 0.269771
v -0.018807 -0.272442 0.265901
v -0.017553 -0.258163 0.261662
v -0.004450 -0.245061 0.259278
v -0.004450 -0.231958 0.259278
v -0.017553 -0.245061 0.260256
v -0.017553 -0.231958 0.259670
v -0.034107 -0.271265 0.302398
v -0.033576 -0.271265 0.289296
v -0.037032 -0.264301 0.302398
v -0.036767 -0.263669 0.289296
v -0.039784 -0.257750 0.302398
v -0.039519 -0.257118 0.289296
v -0.028725 -0.272442 0.274960
v -0.025845 -0.268860 0.268191
v -0.034874 -0.258803 0.275539
v -0.028092 -0.258163 0.266618
v -0.038571 -0.254862 0.279470
v -0.045114 -0.245061 0.302398
v -0.044584 -0.245061 0.289296
v -0.049087 -0.235602 0.302398
v -0.048822 -0.234971 0.289296
v -0.036414 -0.249727 0.270735
v -0.031491 -0.245240 0.265666
v -0.030655 -0.231958 0.262473
v -0.040570 -0.245240 0.275539
v -0.038249 -0.240992 0.268621
v -0.046719 -0.231600 0.276117
v -0.040147 -0.231958 0.267264
v -0.051839 -0.229051 0.302398
v -0.051574 -0.228420 0.289296
v -0.050975 -0.226995 0.280433
v 0.056843 -0.217745 0.302398
v 0.056576 -0.217124 0.289296
v 0.061985 -0.205754 0.302398
v 0.061452 -0.205754 0.289296
v 0.055710 -0.215103 0.279703
v 0.057620 -0.205715 0.275679
v 0.055419 -0.201322 0.268706
v 0.069012 -0.189364 0.302398
v 0.068746 -0.188743 0.289296
v 0.073220 -0.179549 0.302398
v 0.072688 -0.179549 0.289296
v 0.066203 -0.195915 0.302398
v 0.065937 -0.195294 0.289296
v 0.068191 -0.187448 0.280558
v 0.069602 -0.178640 0.276192
v 0.067899 -0.173667 0.269248
v 0.063809 -0.192150 0.276192
v 0.057278 -0.192651 0.267376
v 0.066027 -0.182402 0.271824
v 0.061420 -0.178640 0.266424
v 0.081181 -0.160983 0.302398
v 0.081026 -0.160620 0.291684
v 0.084456 -0.153344 0.302398
v 0.083309 -0.154593 0.288108
v 0.082543 -0.151057 0.278838
v 0.096159 -0.126050 0.302398
v 0.095893 -0.125429 0.289296
v 0.090074 -0.140242 0.302398
v 0.089542 -0.140242 0.289296
v 0.093350 -0.132601 0.302398
v 0.093084 -0.131981 0.289296
v 0.095023 -0.123402 0.279694
v 0.084955 -0.141083 0.275160
v 0.082253 -0.137277 0.268320
v 0.091145 -0.127517 0.275673
v 0.084425 -0.127140 0.266797
v 0.078372 -0.167534 0.302398
v 0.078601 -0.165571 0.288108
v 0.080671 -0.159792 0.282949
v 0.074528 -0.166447 0.276193
v 0.069448 -0.166447 0.268068
v 0.079163 -0.154593 0.275160
v 0.072257 -0.153344 0.266287
v 0.061061 -0.166447 0.263486
v 0.061061 -0.153344 0.261276
v 0.080380 -0.146011 0.270103
v 0.075273 -0.141083 0.265320
v 0.074164 -0.127140 0.261871
v 0.061061 -0.140242 0.260049
v 0.061061 -0.127140 0.259535
v 0.054034 -0.224296 0.302398
v 0.053768 -0.223675 0.289296
v 0.051826 -0.219225 0.275679
v 0.045109 -0.218856 0.266803
v 0.053547 -0.210057 0.270968
v 0.048691 -0.205715 0.265801
v 0.034857 -0.218856 0.261879
v 0.034857 -0.205754 0.260362
v 0.047959 -0.192651 0.262623
v 0.047959 -0.179549 0.260819
v 0.034857 -0.192651 0.259707
v 0.034857 -0.179549 0.259364
v 0.021755 -0.218856 0.259536
v 0.021755 -0.205754 0.259279
v 0.008652 -0.218856 0.259278
v 0.008652 -0.205754 0.259278
v 0.021755 -0.192651 0.259278
v 0.021755 -0.179549 0.259278
v 0.008652 -0.192651 0.259278
v 0.008652 -0.179549 0.259278
v 0.047959 -0.166447 0.259878
v 0.047959 -0.153344 0.259449
v 0.034857 -0.166447 0.259278
v 0.034857 -0.153344 0.259278
v 0.047959 -0.140242 0.259278
v 0.047959 -0.127140 0.259278
v 0.034857 -0.140242 0.259278
v 0.034857 -0.127140 0.259278
v 0.021755 -0.166447 0.259278
v 0.021755 -0.153344 0.259278
v 0.008652 -0.166447 0.259278
v 0.008652 -0.153344 0.259278
v 0.021755 -0.140242 0.259278
v 0.021755 -0.127140 0.259278
v 0.008652 -0.140242 0.259278
v 0.008652 -0.127140 0.259278
v 0.101310 -0.114037 0.302398
v 0.100778 -0.114037 0.289296
v 0.105520 -0.104220 0.302398
v 0.105253 -0.103599 0.289296
v 0.096938 -0.114008 0.275673
v 0.094733 -0.109621 0.268702
v 0.103128 -0.100442 0.276187
v 0.096595 -0.100935 0.267369
v 0.092860 -0.118356 0.270959
v 0.088002 -0.114008 0.265796
v 0.087266 -0.100935 0.262615
v 0.105340 -0.090700 0.271815
v 0.100731 -0.086933 0.266416
v 0.100368 -0.074730 0.263475
v 0.087266 -0.087833 0.260814
v 0.087266 -0.074730 0.259876
v 0.074164 -0.114037 0.260357
v 0.074164 -0.100935 0.259705
v 0.061061 -0.114037 0.259278
v 0.061061 -0.100935 0.259278
v 0.074164 -0.087833 0.259363
v 0.074164 -0.074730 0.259278
v 0.061061 -0.087833 0.259278
v 0.061061 -0.074730 0.259278
v 0.100368 -0.061628 0.261272
v 0.100368 -0.048526 0.260047
v 0.087266 -0.061628 0.259449
v 0.087266 -0.048526 0.259278
v 0.100368 -0.035423 0.259534
v 0.100368 -0.022321 0.259278
v 0.087266 -0.035423 0.259278
v 0.087266 -0.022321 0.259278
v 0.074164 -0.061628 0.259278
v 0.074164 -0.048526 0.259278
v 0.061061 -0.061628 0.259278
v 0.061061 -0.048526 0.259278
v 0.074164 -0.035423 0.259278
v 0.074164 -0.022321 0.259278
v 0.061061 -0.035423 0.259278
v 0.061061 -0.022321 0.259278
v 0.047959 -0.114037 0.259278
v 0.047959 -0.100935 0.259278
v 0.034857 -0.114037 0.259278
v 0.034857 -0.100935 0.259278
v 0.047959 -0.087833 0.259278
v 0.047959 -0.074730 0.259278
v 0.034857 -0.087833 0.259278
v 0.034857 -0.074730 0.259278
v 0.021755 -0.114037 0.259278
v 0.021755 -0.100935 0.259278
v 0.008652 -0.114037 0.259363
v 0.008652 -0.100935 0.259705
v 0.021755 -0.087833 0.259278
v 0.021755 -0.074730 0.259534
v 0.008652 -0.087833 0.260354
v 0.008652 -0.074730 0.261863
v 0.047959 -0.061628 0.259278
v 0.047959 -0.048526 0.259278
v 0.034857 -0.061628 0.259278
v 0.034857 -0.048526 0.259447
v 0.047959 -0.035423 0.259278
v 0.047959 -0.022321 0.259361
v 0.034857 -0.035423 0.259873
v 0.034857 -0.022321 0.260802
v 0.002131 -0.042043 0.282880
v 0.021755 -0.061628 0.260045
v 0.021755 -0.048526 0.261265
v 0.002424 -0.055831 0.270087
v 0.007536 -0.060770 0.265314
v 0.003627 -0.047256 0.275150
v 0.010538 -0.048526 0.266278
v 0.004416 -0.034283 0.302398
v 0.004184 -0.036277 0.288067
v 0.009536 -0.022321 0.302398
v 0.010068 -0.022321 0.289296
v 0.021755 -0.035423 0.263453
v 0.016766 -0.019421 0.271793
v 0.021382 -0.023201 0.266397
v 0.008236 -0.035423 0.276193
v 0.013342 -0.035423 0.268040
v 0.013178 -0.023201 0.276174
v 0.014897 -0.028156 0.269221
v -0.004450 -0.218856 0.259278
v -0.004450 -0.205754 0.259278
v -0.017553 -0.218856 0.259348
v -0.017553 -0.205754 0.259278
v -0.004450 -0.192651 0.259278
v -0.004450 -0.179549 0.259278
v -0.017553 -0.192651 0.259278
v -0.017553 -0.179549 0.259278
v -0.030655 -0.218856 0.260744
v -0.030655 -0.205754 0.259862
v -0.048819 -0.221860 0.271698
v -0.044173 -0.218038 0.266328
v -0.043757 -0.205754 0.263397
v -0.030655 -0.192651 0.259444
v -0.030655 -0.179549 0.259278
v -0.043757 -0.192651 0.261259
v -0.043757 -0.179549 0.260055
v -0.004450 -0.166447 0.259278
v -0.004450 -0.153344 0.259278
v -0.017553 -0.166447 0.259278
v -0.017553 -0.153344 0.259278
v -0.004450 -0.140242 0.259278
v -0.004450 -0.127140 0.259278
v -0.017553 -0.140242 0.259278
v -0.017553 -0.127140 0.259278
v -0.030655 -0.166447 0.259278
v -0.030655 -0.153344 0.259278
v -0.043757 -0.166447 0.259550
v -0.043757 -0.153344 0.259288
v -0.030655 -0.140242 0.259278
v -0.030655 -0.127140 0.259278
v -0.043757 -0.140242 0.259278
v -0.043757 -0.127140 0.259278
v -0.056122 -0.218856 0.302398
v -0.055591 -0.218856 0.289296
v -0.061142 -0.206904 0.302398
v -0.061365 -0.204904 0.288073
v -0.063894 -0.200353 0.302398
v -0.063733 -0.199969 0.291625
v -0.052416 -0.218038 0.276117
v -0.050653 -0.213126 0.269167
v -0.057330 -0.205754 0.276193
v -0.052202 -0.205754 0.267995
v -0.063379 -0.199128 0.282890
v -0.067129 -0.192651 0.302398
v -0.065980 -0.193917 0.288073
v -0.072633 -0.179549 0.302398
v -0.072102 -0.179549 0.289296
v -0.061867 -0.193917 0.275176
v -0.054953 -0.192651 0.266275
v -0.063057 -0.185258 0.270130
v -0.057958 -0.180354 0.265344
v -0.065214 -0.190393 0.278865
v -0.067564 -0.180354 0.275176
v -0.064892 -0.176523 0.268352
v -0.075949 -0.171655 0.302398
v -0.075684 -0.171023 0.289296
v -0.056859 -0.166447 0.261948
v -0.056859 -0.153344 0.260421
v -0.073712 -0.166714 0.275754
v -0.067008 -0.166447 0.266859
v -0.075461 -0.157391 0.271094
v -0.070641 -0.153152 0.265887
v -0.056859 -0.140242 0.259742
v -0.056859 -0.127140 0.259384
v -0.069962 -0.140242 0.262786
v -0.069962 -0.127140 0.260936
v -0.078701 -0.165104 0.302398
v -0.078435 -0.164472 0.289296
v -0.083641 -0.153344 0.302398
v -0.083110 -0.153344 0.289296
v -0.077618 -0.162525 0.279829
v -0.079409 -0.153152 0.275754
v -0.077296 -0.148656 0.268782
v -0.088004 -0.142957 0.302398
v -0.087739 -0.142325 0.289296
v -0.090756 -0.136406 0.302398
v -0.090491 -0.135774 0.289296
v -0.094648 -0.127140 0.302398
v -0.094117 -0.127140 0.289296
v -0.085558 -0.139512 0.276373
v -0.079063 -0.140242 0.267504
v -0.087865 -0.129524 0.272126
v -0.083324 -0.125950 0.266669
v -0.090022 -0.134658 0.280861
v -0.091254 -0.125950 0.276373
v -0.089700 -0.120789 0.269526
v -0.004450 -0.114037 0.259363
v -0.004450 -0.100935 0.259705
v -0.017553 -0.114037 0.259278
v -0.017553 -0.100935 0.259278
v -0.004450 -0.087833 0.260423
v -0.004450 -0.074730 0.262000
v -0.017553 -0.087833 0.259347
v -0.017553 -0.074730 0.259671
v -0.030655 -0.114037 0.259278
v -0.030655 -0.100935 0.259278
v -0.043757 -0.114037 0.259278
v -0.043757 -0.100935 0.259278
v -0.030655 -0.087833 0.259278
v -0.030655 -0.074730 0.259278
v -0.043757 -0.087833 0.259278
v -0.043757 -0.074730 0.259278
v 0.001583 -0.042043 0.282880
v 0.001281 -0.055831 0.270087
v -0.003632 -0.060770 0.265496
v -0.000309 -0.047256 0.275150
v -0.007074 -0.048526 0.266661
v -0.017553 -0.061628 0.260274
v -0.017553 -0.048526 0.261714
v -0.000934 -0.034283 0.302398
v -0.000851 -0.036277 0.288067
v -0.006759 -0.022321 0.302398
v -0.007291 -0.022321 0.289296
v -0.006485 -0.034355 0.275025
v -0.009313 -0.038010 0.268226
v -0.009413 -0.022321 0.279199
v -0.011173 -0.029276 0.269879
v -0.016345 -0.034355 0.265227
v -0.012654 -0.022321 0.272648
v -0.019206 -0.022321 0.266182
v -0.030655 -0.061628 0.259278
v -0.030655 -0.048526 0.259513
v -0.043757 -0.061628 0.259278
v -0.043757 -0.048526 0.259278
v -0.030655 -0.035423 0.260004
v -0.030655 -0.022321 0.261146
v -0.043757 -0.035423 0.259278
v -0.043757 -0.022321 0.259424
v -0.056859 -0.114037 0.259278
v -0.056859 -0.100935 0.259278
v -0.069962 -0.114037 0.259934
v -0.069962 -0.100935 0.259480
v -0.056859 -0.087833 0.259278
v -0.056859 -0.074730 0.259278
v -0.069962 -0.087833 0.259278
v -0.069962 -0.074730 0.259278
v -0.100059 -0.114258 0.302398
v -0.100203 -0.112815 0.288797
v -0.102426 -0.106791 0.284096
v -0.083064 -0.114037 0.263858
v -0.083064 -0.100935 0.261474
v -0.095856 -0.114037 0.276193
v -0.091118 -0.114037 0.268385
v -0.100705 -0.101828 0.275391
v -0.093870 -0.100935 0.266454
v -0.083064 -0.087833 0.260149
v -0.083064 -0.074730 0.259621
v -0.102104 -0.092922 0.270489
v -0.097108 -0.088266 0.265515
v -0.096167 -0.074730 0.262260
v -0.056859 -0.061628 0.259278
v -0.056859 -0.048526 0.259278
v -0.069962 -0.061628 0.259278
v -0.069962 -0.048526 0.259278
v -0.056859 -0.035423 0.259278
v -0.056859 -0.022321 0.259278
v -0.069962 -0.035423 0.259278
v -0.069962 -0.022321 0.259278
v -0.083064 -0.061628 0.259323
v -0.083064 -0.048526 0.259278
v -0.096167 -0.061628 0.260613
v -0.096167 -0.048526 0.259814
v -0.083064 -0.035423 0.259278
v -0.083064 -0.022321 0.259278
v -0.096167 -0.035423 0.259420
v -0.096167 -0.022321 0.259278
v -0.102811 -0.107707 0.302398
v -0.102780 -0.107634 0.292831
v -0.105656 -0.100935 0.302398
v -0.104818 -0.101828 0.288797
v -0.104261 -0.098056 0.279224
v -0.111159 -0.087833 0.302398
v -0.110629 -0.087833 0.289296
v -0.114866 -0.079009 0.302398
v -0.114600 -0.078377 0.289296
v -0.117617 -0.072458 0.302398
v -0.117352 -0.071826 0.289296
v -0.106402 -0.088266 0.275391
v -0.103938 -0.084187 0.268512
v -0.112551 -0.074626 0.275970
v -0.105925 -0.074730 0.267099
v -0.116664 -0.070189 0.280188
v -0.122167 -0.061628 0.302398
v -0.121636 -0.061628 0.289296
v -0.126921 -0.050311 0.302398
v -0.126655 -0.049679 0.289296
v -0.114508 -0.065055 0.271453
v -0.109792 -0.061064 0.266109
v -0.109269 -0.048526 0.263098
v -0.118248 -0.061064 0.275970
v -0.116342 -0.056320 0.268942
v -0.124396 -0.047424 0.277097
v -0.117979 -0.048526 0.267745
v -0.109269 -0.035423 0.261128
v -0.109269 -0.022321 0.260006
v -0.127283 -0.035423 0.272592
v -0.120732 -0.035423 0.266169
v -0.128747 -0.028453 0.269885
v -0.123576 -0.023380 0.265238
v -0.129673 -0.043760 0.302398
v -0.129407 -0.043128 0.289296
v -0.129069 -0.042322 0.282067
v -0.133174 -0.035423 0.302398
v -0.132643 -0.035423 0.289296
v -0.138678 -0.022321 0.302398
v -0.138147 -0.022321 0.289296
v -0.130517 -0.035423 0.279143
v -0.133395 -0.023380 0.275029
v -0.130581 -0.019718 0.268242
v 0.212964 0.151702 0.338232
v 0.212673 0.165482 0.349209
v 0.214894 0.161114 0.342242
v 0.213843 0.149653 0.328603
v 0.214108 0.149034 0.315500
v 0.218756 0.161112 0.328603
v 0.219287 0.161112 0.315500
v 0.225444 0.179358 0.337377
v 0.225154 0.193138 0.348687
v 0.226877 0.188189 0.341728
v 0.214546 0.174214 0.350548
v 0.221084 0.174680 0.341728
v 0.218664 0.188189 0.351510
v 0.223281 0.184403 0.346112
v 0.226012 0.178034 0.328603
v 0.226277 0.177415 0.315500
v 0.229992 0.187317 0.328603
v 0.230523 0.187317 0.315500
v 0.223203 0.171483 0.328603
v 0.223469 0.170864 0.315500
v 0.161171 0.032345 0.339079
v 0.159652 0.022784 0.326276
v 0.159814 0.022407 0.315500
v 0.161945 0.028822 0.329827
v 0.163108 0.030089 0.315500
v 0.186131 0.087656 0.337368
v 0.186695 0.086340 0.328603
v 0.186961 0.085720 0.315500
v 0.173651 0.060000 0.338223
v 0.160880 0.046125 0.349587
v 0.163593 0.042331 0.342750
v 0.163060 0.056293 0.351115
v 0.169783 0.055897 0.342236
v 0.174526 0.057958 0.328603
v 0.174792 0.057339 0.315500
v 0.168195 0.043191 0.328603
v 0.168726 0.043191 0.315500
v 0.171717 0.051407 0.328603
v 0.171983 0.050788 0.315500
v 0.173360 0.073781 0.349206
v 0.175575 0.069406 0.342236
v 0.175229 0.082498 0.350542
v 0.181766 0.082972 0.341723
v 0.166624 0.069406 0.352115
v 0.171488 0.065046 0.346958
v 0.165880 0.082498 0.355302
v 0.179430 0.069396 0.328603
v 0.179962 0.069396 0.315500
v 0.183887 0.079788 0.328603
v 0.184152 0.079169 0.315500
v 0.146818 -0.004046 0.337359
v 0.146527 0.009735 0.348669
v 0.148240 0.004774 0.341718
v 0.135913 -0.009218 0.350536
v 0.142447 -0.008735 0.341718
v 0.140042 0.004774 0.351493
v 0.144655 0.001000 0.346094
v 0.147379 -0.005355 0.328603
v 0.147645 -0.005974 0.315500
v 0.151340 0.003884 0.328603
v 0.151872 0.003884 0.315500
v 0.144570 -0.011906 0.328603
v 0.144836 -0.012526 0.315500
v 0.148082 0.016986 0.349851
v 0.153182 0.016986 0.341705
v 0.150891 0.030089 0.351621
v 0.157801 0.028822 0.342750
v 0.139676 0.016986 0.354438
v 0.139676 0.030089 0.356635
v 0.157239 0.017844 0.329827
v 0.157005 0.015855 0.315500
v 0.159298 0.023610 0.335011
v 0.126573 -0.009218 0.355295
v 0.126573 0.003884 0.357092
v 0.113471 -0.009218 0.358198
v 0.113471 0.003884 0.358539
v 0.126573 0.016986 0.358027
v 0.126573 0.030089 0.358454
v 0.113471 0.016986 0.358624
v 0.113471 0.030089 0.358624
v 0.153895 0.042331 0.352588
v 0.159007 0.037390 0.347814
v 0.152778 0.056293 0.356044
v 0.139676 0.043191 0.357857
v 0.139676 0.056293 0.358369
v 0.152778 0.069396 0.357552
v 0.152778 0.082498 0.358200
v 0.139676 0.069396 0.358624
v 0.139676 0.082498 0.358624
v 0.126573 0.043191 0.358624
v 0.126573 0.056293 0.358624
v 0.113471 0.043191 0.358624
v 0.113471 0.056293 0.358624
v 0.126573 0.069396 0.358624
v 0.126573 0.082498 0.358624
v 0.113471 0.069396 0.358624
v 0.113471 0.082498 0.358624
v 0.185840 0.101436 0.348678
v 0.187558 0.096481 0.341723
v 0.187398 0.108703 0.349860
v 0.192508 0.108703 0.341705
v 0.198966 0.114485 0.326305
v 0.199130 0.114101 0.315500
v 0.190666 0.095600 0.328603
v 0.191197 0.095600 0.315500
v 0.196557 0.109552 0.329844
v 0.196321 0.107550 0.315500
v 0.200484 0.124046 0.339088
v 0.200193 0.137827 0.349591
v 0.202912 0.134038 0.342755
v 0.190207 0.121805 0.351625
v 0.197119 0.120529 0.342755
v 0.193206 0.134038 0.352592
v 0.198321 0.129092 0.347822
v 0.201264 0.120529 0.329844
v 0.202433 0.121805 0.315500
v 0.207520 0.134907 0.328603
v 0.208051 0.134907 0.315500
v 0.198611 0.115311 0.335040
v 0.179353 0.096481 0.351502
v 0.183968 0.092701 0.346103
v 0.178982 0.108703 0.354449
v 0.165880 0.095600 0.357097
v 0.165880 0.108703 0.358029
v 0.178982 0.121805 0.356640
v 0.178982 0.134907 0.357858
v 0.165880 0.121805 0.358455
v 0.165880 0.134907 0.358624
v 0.202377 0.148010 0.351121
v 0.209102 0.147605 0.342242
v 0.205935 0.161114 0.352121
v 0.210801 0.156747 0.346967
v 0.192085 0.148010 0.356051
v 0.192085 0.161112 0.357556
v 0.211034 0.143102 0.328603
v 0.211299 0.142483 0.315500
v 0.205187 0.174214 0.355310
v 0.205187 0.187317 0.357101
v 0.192085 0.174214 0.358202
v 0.192085 0.187317 0.358541
v 0.178982 0.148010 0.358370
v 0.178982 0.161112 0.358624
v 0.165880 0.148010 0.358624
v 0.165880 0.161112 0.358624
v 0.178982 0.174214 0.358624
v 0.178982 0.187317 0.358624
v 0.165880 0.174214 0.358624
v 0.165880 0.187317 0.358624
v 0.152778 0.095600 0.358540
v 0.152778 0.108703 0.358624
v 0.139676 0.095600 0.358624
v 0.139676 0.108703 0.358624
v 0.152778 0.121805 0.358624
v 0.152778 0.134907 0.358624
v 0.139676 0.121805 0.358624
v 0.139676 0.134907 0.358624
v 0.126573 0.095600 0.358624
v 0.126573 0.108703 0.358624
v 0.113471 0.095600 0.358624
v 0.113471 0.108703 0.358624
v 0.126573 0.121805 0.358624
v 0.126573 0.134907 0.358624
v 0.113471 0.121805 0.358624
v 0.113471 0.134907 0.358460
v 0.152778 0.148010 0.358624
v 0.152778 0.161112 0.358624
v 0.139676 0.148010 0.358624
v 0.139676 0.161112 0.358624
v 0.152778 0.174214 0.358624
v 0.152778 0.187317 0.358624
v 0.139676 0.174214 0.358624
v 0.139676 0.187317 0.358624
v 0.126573 0.148010 0.358624
v 0.126573 0.161112 0.358546
v 0.113471 0.148010 0.358039
v 0.113471 0.161112 0.357127
v 0.126573 0.174214 0.358212
v 0.126573 0.187317 0.357580
v 0.113471 0.174214 0.355353
v 0.112698 0.187370 0.352154
v 0.107816 0.191774 0.347023
v 0.239797 0.215748 0.339096
v 0.238279 0.206187 0.326334
v 0.238446 0.205796 0.315500
v 0.240582 0.212237 0.329862
v 0.241759 0.213521 0.315500
v 0.252278 0.243404 0.338241
v 0.239507 0.229528 0.349595
v 0.242230 0.225746 0.342760
v 0.241693 0.239726 0.349774
v 0.248420 0.239312 0.342247
v 0.253159 0.241348 0.328603
v 0.253425 0.240728 0.315500
v 0.246846 0.226624 0.328603
v 0.247377 0.226624 0.315500
v 0.250350 0.234797 0.328603
v 0.250616 0.234177 0.315500
v 0.226715 0.200419 0.349870
v 0.231834 0.200419 0.341705
v 0.229524 0.213521 0.351628
v 0.236438 0.212237 0.342760
v 0.218290 0.200419 0.354461
v 0.218290 0.213521 0.356644
v 0.235875 0.201259 0.329862
v 0.235637 0.199245 0.315500
v 0.237925 0.207013 0.335068
v 0.232517 0.225746 0.352521
v 0.237634 0.220793 0.347831
v 0.231392 0.239726 0.352532
v 0.218290 0.226624 0.357420
v 0.218290 0.239726 0.353773
v 0.252278 0.248723 0.338241
v 0.241379 0.246734 0.348941
v 0.245246 0.249486 0.342247
v 0.253159 0.250190 0.328603
v 0.253425 0.250434 0.315500
v 0.244494 0.254102 0.328603
v 0.244494 0.254591 0.315500
v 0.231392 0.246963 0.349283
v 0.231392 0.250631 0.341705
v 0.218290 0.246963 0.349283
v 0.218290 0.250631 0.341705
v 0.231392 0.254102 0.328603
v 0.231392 0.254591 0.315500
v 0.218290 0.254102 0.328603
v 0.218290 0.254591 0.315500
v 0.205187 0.200419 0.358031
v 0.205187 0.213521 0.358456
v 0.192085 0.200419 0.358624
v 0.192085 0.213521 0.358624
v 0.205187 0.226624 0.357930
v 0.205187 0.239726 0.353773
v 0.192085 0.226624 0.357930
v 0.192085 0.239726 0.353773
v 0.178982 0.200419 0.358624
v 0.178982 0.213521 0.358624
v 0.165880 0.200419 0.358624
v 0.165880 0.213521 0.358624
v 0.178982 0.226624 0.357930
v 0.178982 0.239726 0.353773
v 0.165880 0.226624 0.357930
v 0.165880 0.239726 0.353773
v 0.205187 0.246963 0.349283
v 0.205187 0.250631 0.341705
v 0.192085 0.246963 0.349283
v 0.192085 0.250631 0.341705
v 0.205187 0.254102 0.328603
v 0.205187 0.254591 0.315500
v 0.192085 0.254102 0.328603
v 0.192085 0.254591 0.315500
v 0.178982 0.246963 0.349283
v 0.178982 0.250631 0.341705
v 0.165880 0.246963 0.349283
v 0.165880 0.250631 0.341705
v 0.178982 0.254102 0.328603
v 0.178982 0.254591 0.315500
v 0.165880 0.254102 0.328603
v 0.165880 0.254591 0.315500
v 0.152778 0.200419 0.358624
v 0.152778 0.213521 0.358624
v 0.139676 0.200419 0.358376
v 0.139676 0.213521 0.357871
v 0.152778 0.226624 0.357930
v 0.152778 0.239726 0.353773
v 0.139676 0.226624 0.356492
v 0.139676 0.239726 0.352700
v 0.126573 0.200419 0.356097
v 0.125423 0.214457 0.352619
v 0.120289 0.219448 0.347889
v 0.116217 0.200419 0.351161
v 0.109479 0.200883 0.342275
v 0.118420 0.210713 0.349619
v 0.115665 0.214457 0.342795
v 0.107559 0.205476 0.328603
v 0.107294 0.206097 0.315500
v 0.111002 0.213521 0.328603
v 0.110471 0.213521 0.315500
v 0.128376 0.226624 0.351655
v 0.121825 0.226624 0.344794
v 0.131180 0.239726 0.349942
v 0.124813 0.238452 0.340466
v 0.118582 0.226624 0.338243
v 0.119997 0.233235 0.335273
v 0.122522 0.240437 0.328603
v 0.122256 0.241057 0.315500
v 0.116610 0.226624 0.328603
v 0.116079 0.226624 0.315500
v 0.119718 0.233886 0.328603
v 0.119452 0.234506 0.315500
v 0.152778 0.246963 0.349283
v 0.152778 0.250631 0.341705
v 0.139676 0.246963 0.349143
v 0.139676 0.250631 0.341705
v 0.152778 0.254102 0.328603
v 0.152778 0.254591 0.315500
v 0.139676 0.254102 0.328603
v 0.139676 0.254591 0.315500
v 0.132762 0.246734 0.348755
v 0.130960 0.248454 0.341705
v 0.129073 0.250190 0.328603
v 0.128807 0.250434 0.315500
v 0.100368 -0.009218 0.358624
v 0.100368 0.003884 0.358624
v 0.087266 -0.009218 0.358624
v 0.087266 0.003884 0.358624
v 0.100368 0.016986 0.358624
v 0.100368 0.030089 0.358624
v 0.087266 0.016986 0.358624
v 0.087266 0.030089 0.358624
v 0.074164 -0.009218 0.358624
v 0.074164 0.003884 0.358624
v 0.061061 -0.009218 0.358624
v 0.061061 0.003884 0.358624
v 0.074164 0.016986 0.358624
v 0.074164 0.030089 0.358624
v 0.061061 0.016986 0.358371
v 0.061061 0.030089 0.357861
v 0.100368 0.043191 0.358624
v 0.100368 0.056293 0.358624
v 0.087266 0.043191 0.358624
v 0.087266 0.056293 0.358624
v 0.100368 0.069396 0.358624
v 0.100368 0.082498 0.358624
v 0.087266 0.069396 0.358543
v 0.087266 0.082498 0.358207
v 0.074164 0.043191 0.358457
v 0.074164 0.056293 0.358034
v 0.061061 0.043191 0.356651
v 0.061061 0.056293 0.354481
v 0.074164 0.069396 0.357113
v 0.074164 0.082498 0.355332
v 0.060678 0.068541 0.351528
v 0.056054 0.072340 0.346132
v 0.064779 0.082498 0.350565
v 0.058235 0.082054 0.341741
v 0.056121 0.085286 0.328603
v 0.055855 0.085907 0.315500
v 0.047959 -0.009218 0.358202
v 0.047959 0.003884 0.357558
v 0.034857 -0.009218 0.355310
v 0.034106 0.003886 0.352123
v 0.029239 0.008255 0.346973
v 0.047959 0.016986 0.356058
v 0.046831 0.030973 0.352597
v 0.041712 0.035930 0.347838
v 0.037658 0.016986 0.351128
v 0.030931 0.017399 0.342245
v 0.039843 0.027195 0.349597
v 0.037117 0.030973 0.342765
v 0.029000 0.021916 0.328603
v 0.028734 0.022537 0.315500
v 0.032497 0.030089 0.328603
v 0.031966 0.030089 0.315500
v 0.025500 -0.009218 0.350548
v 0.018961 -0.009687 0.341726
v 0.027369 -0.000480 0.349210
v 0.025147 0.003886 0.342245
v 0.014603 -0.014367 0.337372
v 0.016841 -0.006494 0.328603
v 0.016575 -0.005873 0.315500
v 0.021282 0.003884 0.328603
v 0.020751 0.003884 0.315500
v 0.014037 -0.013045 0.328603
v 0.013771 -0.012424 0.315500
v 0.027076 0.013307 0.338238
v 0.026196 0.015364 0.328603
v 0.025930 0.015985 0.315500
v 0.049817 0.043191 0.351634
v 0.042901 0.044486 0.342765
v 0.052620 0.056293 0.349887
v 0.047487 0.056293 0.341705
v 0.039550 0.040982 0.339103
v 0.041419 0.049717 0.335104
v 0.043458 0.055465 0.329883
v 0.043696 0.057497 0.315500
v 0.038759 0.044486 0.329883
v 0.037574 0.043191 0.315500
v 0.041064 0.050545 0.326369
v 0.040892 0.050946 0.315500
v 0.054185 0.063605 0.348704
v 0.052451 0.068541 0.341741
v 0.053892 0.077392 0.337397
v 0.049320 0.069396 0.328603
v 0.048788 0.069396 0.315500
v 0.053317 0.078735 0.328603
v 0.053051 0.079356 0.315500
v 0.100368 0.095600 0.358624
v 0.100368 0.108703 0.358373
v 0.087266 0.095600 0.357569
v 0.087266 0.108703 0.356077
v 0.100368 0.121805 0.357866
v 0.100368 0.134907 0.356664
v 0.086127 0.122715 0.352608
v 0.081000 0.127689 0.347863
v 0.089096 0.134907 0.351644
v 0.082545 0.134907 0.344712
v 0.073403 0.095628 0.352139
v 0.068527 0.100015 0.346998
v 0.076938 0.108703 0.351144
v 0.070205 0.109141 0.342260
v 0.066658 0.091280 0.349221
v 0.064421 0.095628 0.342260
v 0.066365 0.105066 0.338263
v 0.068279 0.113696 0.328603
v 0.068014 0.114317 0.315500
v 0.060535 0.095600 0.328603
v 0.060004 0.095600 0.315500
v 0.065476 0.107144 0.328603
v 0.065210 0.107766 0.315500
v 0.079131 0.118954 0.349608
v 0.076391 0.122715 0.342780
v 0.079302 0.134907 0.338161
v 0.071750 0.121805 0.328603
v 0.071218 0.121805 0.315500
v 0.077357 0.134907 0.328603
v 0.076826 0.134907 0.315500
v 0.100368 0.148010 0.354513
v 0.099973 0.160283 0.351551
v 0.095343 0.164099 0.346157
v 0.091900 0.148010 0.349914
v 0.085539 0.146710 0.340415
v 0.093474 0.155364 0.348729
v 0.091726 0.160283 0.341756
v 0.083242 0.148657 0.328603
v 0.082976 0.149278 0.315500
v 0.088573 0.161112 0.328603
v 0.088041 0.161112 0.315500
v 0.104059 0.174214 0.350582
v 0.097509 0.173797 0.341756
v 0.105947 0.183039 0.349233
v 0.103696 0.187370 0.342275
v 0.093181 0.169150 0.337422
v 0.095401 0.177066 0.328603
v 0.095135 0.177687 0.315500
v 0.099787 0.187317 0.328603
v 0.099256 0.187317 0.315500
v 0.092597 0.170515 0.328603
v 0.092331 0.171136 0.315500
v 0.080708 0.141476 0.335188
v 0.080438 0.142105 0.328603
v 0.080173 0.142726 0.315500
v -0.010872 -0.015466 0.335752
v -0.021995 -0.009218 0.350110
v -0.015594 -0.010346 0.340754
v -0.023628 -0.001549 0.348912
v -0.021770 0.003245 0.341872
v -0.010541 -0.014689 0.328603
v -0.010275 -0.014065 0.315500
v -0.013331 -0.008138 0.328603
v -0.013066 -0.007514 0.315500
v -0.018451 0.003884 0.328603
v -0.017920 0.003884 0.315500
v -0.023327 0.012259 0.337615
v -0.022672 0.013796 0.328603
v -0.022407 0.014420 0.315500
v -0.030655 -0.009218 0.354745
v -0.030175 0.003245 0.351730
v -0.025488 0.007186 0.346350
v -0.043757 -0.009218 0.358076
v -0.043757 0.003884 0.357232
v -0.034126 0.016986 0.350718
v -0.027530 0.016771 0.341872
v -0.036083 0.026175 0.349326
v -0.033706 0.030361 0.342407
v -0.043757 0.016986 0.355532
v -0.042889 0.030361 0.352288
v -0.037942 0.034910 0.347242
v -0.025463 0.020347 0.328603
v -0.025197 0.020971 0.315500
v -0.029612 0.030089 0.328603
v -0.029080 0.030089 0.315500
v -0.035782 0.039984 0.338507
v -0.046257 0.043191 0.351315
v -0.039467 0.043887 0.342407
v -0.048538 0.053900 0.349724
v -0.045644 0.057478 0.342942
v -0.034804 0.042281 0.328603
v -0.034538 0.042904 0.315500
v -0.037594 0.048832 0.328603
v -0.037328 0.049455 0.315500
v -0.040771 0.056293 0.328603
v -0.040240 0.056293 0.315500
v -0.048596 0.069396 0.339071
v -0.050097 0.076444 0.336132
v -0.046352 0.069396 0.328603
v -0.045821 0.069396 0.315500
v -0.049725 0.077317 0.328603
v -0.049459 0.077940 0.315500
v -0.056859 -0.009218 0.358624
v -0.056859 0.003884 0.358566
v -0.069962 -0.009218 0.358624
v -0.069962 0.003884 0.358624
v -0.056859 0.016986 0.358254
v -0.056859 0.030089 0.357677
v -0.069962 0.016986 0.358624
v -0.069962 0.030089 0.358624
v -0.083064 -0.009218 0.358624
v -0.083064 0.003884 0.358624
v -0.096167 -0.009218 0.358624
v -0.096167 0.003884 0.358624
v -0.083064 0.016986 0.358624
v -0.083064 0.030089 0.358624
v -0.096167 0.016986 0.358624
v -0.096167 0.030089 0.358624
v -0.056859 0.043191 0.356275
v -0.055603 0.057478 0.352721
v -0.050398 0.062635 0.348134
v -0.069962 0.043191 0.358400
v -0.069962 0.056293 0.357920
v -0.058388 0.069396 0.351768
v -0.051837 0.069396 0.345622
v -0.061178 0.082498 0.350197
v -0.054753 0.081486 0.340982
v -0.069962 0.069396 0.356816
v -0.069962 0.082498 0.354855
v -0.052515 0.083868 0.328603
v -0.052250 0.084491 0.315500
v -0.083064 0.043191 0.358624
v -0.083064 0.056293 0.358624
v -0.096167 0.043191 0.358624
v -0.096167 0.056293 0.358624
v -0.083064 0.069396 0.358489
v -0.083064 0.082498 0.358098
v -0.096167 0.069396 0.358624
v -0.096167 0.082498 0.358624
v -0.062853 0.090360 0.348978
v -0.060929 0.095076 0.341940
v -0.062551 0.104169 0.337729
v -0.069433 0.095076 0.351808
v -0.064713 0.099094 0.346463
v -0.073310 0.108703 0.350794
v -0.066689 0.108603 0.341940
v -0.057512 0.095600 0.328603
v -0.056981 0.095600 0.315500
v -0.061856 0.105801 0.328603
v -0.061591 0.106425 0.315500
v -0.064646 0.112352 0.328603
v -0.064381 0.112976 0.315500
v -0.075308 0.118084 0.349376
v -0.072866 0.122193 0.342474
v -0.075006 0.131893 0.338620
v -0.068672 0.121805 0.328603
v -0.068141 0.121805 0.315500
v -0.074492 0.135719 0.328932
v -0.073721 0.134907 0.315500
v -0.083064 0.095600 0.357293
v -0.083064 0.108703 0.355630
v -0.096167 0.095600 0.358578
v -0.096167 0.108703 0.358276
v -0.082147 0.122193 0.352357
v -0.077168 0.126819 0.347355
v -0.085441 0.134907 0.351390
v -0.078627 0.135719 0.342474
v -0.096167 0.121805 0.357726
v -0.096167 0.134907 0.356361
v -0.076867 0.140628 0.333519
v -0.076513 0.141460 0.324784
v -0.076512 0.141461 0.315500
v -0.087763 0.145809 0.349774
v -0.084803 0.149310 0.343009
v -0.087780 0.161112 0.339441
v -0.094861 0.149310 0.352769
v -0.089622 0.154544 0.348246
v -0.097573 0.161112 0.351817
v -0.091021 0.161112 0.345992
v -0.079169 0.146700 0.328932
v -0.079302 0.148012 0.315500
v -0.085413 0.161112 0.328603
v -0.084882 0.161112 0.315500
v -0.089322 0.168353 0.336513
v -0.100363 0.174214 0.350272
v -0.093912 0.173318 0.341210
v -0.102078 0.182268 0.349029
v -0.100088 0.186908 0.342008
v -0.088909 0.169321 0.328603
v -0.088644 0.169945 0.315500
v -0.091699 0.175873 0.328603
v -0.091434 0.176496 0.315500
v -0.096573 0.187317 0.328603
v -0.096042 0.187317 0.315500
v 0.105654 0.196825 0.338288
v 0.104755 0.198925 0.328603
v 0.104490 0.199546 0.315500
v -0.101777 0.196078 0.337842
v -0.101041 0.197806 0.328603
v -0.100775 0.198430 0.315500
v -0.109269 -0.009218 0.358386
v -0.109269 0.003884 0.358624
v -0.122371 -0.009218 0.356152
v -0.122371 0.003884 0.357596
v -0.109269 0.016986 0.358624
v -0.109269 0.030089 0.358624
v -0.122371 0.016986 0.358209
v -0.122371 0.030089 0.358543
v -0.132787 -0.009218 0.351205
v -0.139545 -0.009741 0.342292
v -0.136260 0.003821 0.352164
v -0.141151 -0.000588 0.347051
v -0.143308 -0.005721 0.338316
v -0.142986 0.008147 0.349227
v -0.145241 0.003821 0.342292
v -0.141462 -0.014431 0.328603
v -0.141727 -0.015061 0.315500
v -0.144214 -0.007879 0.328603
v -0.144479 -0.008510 0.315500
v -0.149155 0.003884 0.328603
v -0.149686 0.003884 0.315500
v -0.135474 0.016986 0.355329
v -0.135474 0.030089 0.357097
v -0.144842 0.016986 0.350560
v -0.151390 0.017462 0.341714
v -0.148943 0.031023 0.351464
v -0.153556 0.027279 0.346087
v -0.153517 0.014268 0.328603
v -0.153782 0.013637 0.315500
v -0.109269 0.043191 0.358624
v -0.109269 0.056293 0.358624
v -0.122371 0.043191 0.358624
v -0.122371 0.056293 0.358624
v -0.109269 0.069396 0.358624
v -0.109269 0.082498 0.358624
v -0.122371 0.069396 0.358624
v -0.122371 0.082498 0.358624
v -0.135474 0.043191 0.358017
v -0.135474 0.056293 0.358446
v -0.148576 0.043191 0.354358
v -0.148576 0.056293 0.356582
v -0.135474 0.069396 0.358624
v -0.135474 0.082498 0.358624
v -0.148576 0.069396 0.357825
v -0.148576 0.082498 0.358330
v -0.155712 0.022146 0.337352
v -0.155390 0.036014 0.348619
v -0.157087 0.031023 0.341714
v -0.156269 0.020819 0.328603
v -0.156534 0.020188 0.315500
v -0.160163 0.030089 0.328603
v -0.160693 0.030089 0.315500
v -0.156897 0.043191 0.349782
v -0.161902 0.043191 0.341705
v -0.159649 0.056293 0.351576
v -0.166538 0.055145 0.342655
v -0.169950 0.058747 0.338921
v -0.166036 0.044159 0.329597
v -0.165837 0.042335 0.315500
v -0.168116 0.050013 0.334627
v -0.168469 0.049171 0.325893
v -0.168589 0.048886 0.315500
v -0.170650 0.055145 0.329597
v -0.171701 0.056293 0.315500
v -0.162727 0.068707 0.352508
v -0.167794 0.063881 0.347655
v -0.161678 0.082498 0.355855
v -0.169628 0.072616 0.349497
v -0.172235 0.068707 0.342655
v -0.171704 0.082498 0.350965
v -0.178383 0.082348 0.342077
v -0.176674 0.069396 0.328603
v -0.177205 0.069396 0.315500
v -0.180379 0.078215 0.328603
v -0.180644 0.077584 0.315500
v -0.182354 0.086615 0.337957
v -0.183131 0.084766 0.328603
v -0.183396 0.084135 0.315500
v -0.109269 0.095600 0.358624
v -0.109269 0.108703 0.358624
v -0.122371 0.095600 0.358624
v -0.122371 0.108703 0.358624
v -0.109269 0.121805 0.358624
v -0.109269 0.134907 0.358411
v -0.122371 0.121805 0.358624
v -0.122371 0.134907 0.358624
v -0.135474 0.095600 0.358624
v -0.135474 0.108703 0.358624
v -0.148576 0.095600 0.358603
v -0.148576 0.108703 0.358624
v -0.135474 0.121805 0.358624
v -0.135474 0.134907 0.358624
v -0.148576 0.121805 0.358624
v -0.148576 0.134907 0.358624
v -0.109269 0.148010 0.357943
v -0.109269 0.161112 0.356877
v -0.122371 0.148010 0.358624
v -0.122371 0.161112 0.358500
v -0.109269 0.174214 0.354953
v -0.108691 0.186908 0.351878
v -0.103938 0.191003 0.346577
v -0.122371 0.174214 0.358121
v -0.122371 0.187317 0.357353
v -0.135474 0.148010 0.358624
v -0.135474 0.161112 0.358624
v -0.148576 0.148010 0.358624
v -0.148576 0.161112 0.358624
v -0.135474 0.174214 0.358624
v -0.135474 0.187317 0.358589
v -0.148576 0.174214 0.358624
v -0.148576 0.187317 0.358624
v -0.161678 0.095600 0.357420
v -0.161678 0.108703 0.358137
v -0.175410 0.095910 0.351943
v -0.180198 0.091748 0.346692
v -0.174781 0.108703 0.355017
v -0.161678 0.121805 0.358507
v -0.161678 0.134907 0.358624
v -0.174781 0.121805 0.356905
v -0.174781 0.134907 0.357945
v -0.182033 0.100483 0.349067
v -0.184080 0.095910 0.342077
v -0.183759 0.108703 0.350320
v -0.190229 0.109550 0.341296
v -0.194758 0.114482 0.336656
v -0.187682 0.095600 0.328603
v -0.188212 0.095600 0.315500
v -0.192434 0.106913 0.328603
v -0.192699 0.106282 0.315500
v -0.195186 0.113465 0.328603
v -0.195451 0.112833 0.315500
v -0.188094 0.123112 0.351124
v -0.192602 0.119615 0.345391
v -0.187883 0.134907 0.353897
v -0.194437 0.128350 0.348260
v -0.195925 0.123112 0.341296
v -0.195814 0.134907 0.349392
v -0.200428 0.134907 0.341705
v -0.198689 0.121805 0.328603
v -0.199219 0.121805 0.315500
v -0.204193 0.134907 0.328603
v -0.204723 0.134907 0.315500
v -0.161678 0.148010 0.358624
v -0.161678 0.161112 0.358624
v -0.174781 0.148010 0.358411
v -0.174781 0.161112 0.358624
v -0.161678 0.174214 0.358624
v -0.161678 0.187317 0.358624
v -0.174781 0.174214 0.358624
v -0.174781 0.187317 0.358624
v -0.187883 0.148010 0.356340
v -0.187883 0.161112 0.357703
v -0.198566 0.148010 0.351370
v -0.205376 0.147234 0.342439
v -0.201878 0.160796 0.352315
v -0.206841 0.156217 0.347296
v -0.207241 0.142163 0.328603
v -0.207506 0.141532 0.315500
v -0.187883 0.174214 0.358258
v -0.187883 0.187317 0.358567
v -0.200985 0.174214 0.355542
v -0.200985 0.187317 0.357228
v -0.208997 0.151084 0.338561
v -0.208675 0.164952 0.349337
v -0.211073 0.160796 0.342439
v -0.209992 0.148714 0.328603
v -0.210257 0.148083 0.315500
v -0.215201 0.161112 0.328603
v -0.215731 0.161112 0.315500
v -0.210620 0.174214 0.350725
v -0.217222 0.174436 0.341861
v -0.214561 0.187998 0.351697
v -0.219245 0.184085 0.346332
v -0.221401 0.178951 0.337597
v -0.221079 0.192819 0.348864
v -0.222918 0.187998 0.341861
v -0.219296 0.170861 0.328603
v -0.219561 0.170230 0.315500
v -0.222047 0.177412 0.328603
v -0.222313 0.176781 0.315500
v -0.226208 0.187317 0.328603
v -0.226738 0.187317 0.315500
v -0.112494 0.200419 0.350869
v -0.105849 0.200435 0.342008
v -0.114532 0.209993 0.349427
v -0.112025 0.214025 0.342543
v -0.122371 0.200419 0.355728
v -0.121405 0.214025 0.352427
v -0.116393 0.218728 0.347468
v -0.103831 0.204357 0.328603
v -0.103565 0.204981 0.315500
v -0.107734 0.213521 0.328603
v -0.107203 0.213521 0.315500
v -0.114232 0.223802 0.338733
v -0.124625 0.226624 0.351466
v -0.117786 0.227551 0.342543
v -0.127415 0.239726 0.349510
v -0.122666 0.239726 0.341705
v -0.113652 0.227551 0.329159
v -0.112783 0.226624 0.315500
v -0.115738 0.233369 0.325163
v -0.115696 0.233465 0.315500
v -0.116092 0.232537 0.333898
v -0.118329 0.238532 0.329159
v -0.118487 0.240017 0.315500
v -0.135474 0.200419 0.358299
v -0.135474 0.213521 0.357775
v -0.148576 0.200419 0.358624
v -0.148576 0.213521 0.358624
v -0.135474 0.226624 0.356303
v -0.135474 0.239726 0.352268
v -0.148576 0.226624 0.357930
v -0.148576 0.239726 0.353773
v -0.128847 0.246453 0.348360
v -0.127189 0.248243 0.341705
v -0.125303 0.250190 0.328603
v -0.125038 0.250434 0.315500
v -0.135474 0.246752 0.348847
v -0.135474 0.250420 0.341705
v -0.148576 0.246963 0.349283
v -0.148576 0.250631 0.341705
v -0.135474 0.254102 0.328603
v -0.135474 0.254591 0.315500
v -0.148576 0.254102 0.328603
v -0.148576 0.254591 0.315500
v -0.161678 0.200419 0.358624
v -0.161678 0.213521 0.358624
v -0.174781 0.200419 0.358624
v -0.174781 0.213521 0.358624
v -0.161678 0.226624 0.357930
v -0.161678 0.239726 0.353773
v -0.174781 0.226624 0.357930
v -0.174781 0.239726 0.353773
v -0.187883 0.200419 0.358624
v -0.187883 0.213521 0.358624
v -0.200985 0.200419 0.358066
v -0.200985 0.213521 0.358471
v -0.187883 0.226624 0.357930
v -0.187883 0.239726 0.353773
v -0.200985 0.226624 0.357930
v -0.200985 0.239726 0.353773
v -0.161678 0.246963 0.349283
v -0.161678 0.250631 0.341705
v -0.174781 0.246963 0.349283
v -0.174781 0.250631 0.341705
v -0.161678 0.254102 0.328603
v -0.161678 0.254591 0.315500
v -0.174781 0.254102 0.328603
v -0.174781 0.254591 0.315500
v -0.187883 0.246963 0.349283
v -0.187883 0.250631 0.341705
v -0.200985 0.246963 0.349283
v -0.200985 0.250631 0.341705
v -0.187883 0.254102 0.328603
v -0.187883 0.254591 0.315500
v -0.200985 0.254102 0.328603
v -0.200985 0.254591 0.315500
v -0.214088 0.200419 0.354673
v -0.214088 0.213521 0.356713
v -0.222675 0.200419 0.350048
v -0.229067 0.201638 0.340573
v -0.225427 0.213521 0.351682
v -0.231978 0.213521 0.344936
v -0.231350 0.199559 0.328603
v -0.231616 0.198928 0.315500
v -0.214088 0.226624 0.357429
v -0.214088 0.239726 0.353773
v -0.228345 0.225682 0.352535
v -0.233483 0.220686 0.347901
v -0.227190 0.239726 0.352541
v -0.233805 0.206818 0.335450
v -0.235213 0.213521 0.338385
v -0.234102 0.206111 0.328603
v -0.234367 0.205479 0.315500
v -0.237215 0.213521 0.328603
v -0.237746 0.213521 0.315500
v -0.235318 0.229421 0.349607
v -0.238066 0.225682 0.342802
v -0.237482 0.239726 0.349782
v -0.244215 0.239322 0.342224
v -0.248044 0.243420 0.338202
v -0.242719 0.226624 0.328603
v -0.243249 0.226624 0.315500
v -0.246157 0.234809 0.328603
v -0.246423 0.234177 0.315500
v -0.248909 0.241360 0.328603
v -0.249174 0.240728 0.315500
v -0.214088 0.246963 0.349283
v -0.214088 0.250631 0.341705
v -0.227190 0.246963 0.349283
v -0.227190 0.250631 0.341705
v -0.214088 0.254102 0.328603
v -0.214088 0.254591 0.315500
v -0.227190 0.254102 0.328603
v -0.227190 0.254591 0.315500
v -0.237152 0.246734 0.348941
v -0.241029 0.249486 0.342224
v -0.248044 0.248723 0.338202
v -0.240293 0.254102 0.328603
v -0.240293 0.254591 0.315500
v -0.248909 0.250190 0.328603
v -0.249174 0.250434 0.315500
v 0.214108 0.149034 0.302398
v 0.213842 0.149654 0.289296
v 0.219287 0.161112 0.302398
v 0.218755 0.161112 0.289296
v 0.212964 0.151703 0.279667
v 0.214893 0.161115 0.275657
v 0.212673 0.165484 0.268690
v 0.226277 0.177415 0.302398
v 0.226012 0.178035 0.289296
v 0.230523 0.187317 0.302398
v 0.229991 0.187317 0.289296
v 0.223469 0.170864 0.302398
v 0.223202 0.171484 0.289296
v 0.225444 0.179359 0.280523
v 0.226876 0.188190 0.276171
v 0.225153 0.193139 0.269212
v 0.221083 0.174680 0.276171
v 0.214545 0.174214 0.267352
v 0.223280 0.184404 0.271788
v 0.218664 0.188190 0.266391
v 0.159814 0.022407 0.302398
v 0.159652 0.022784 0.291626
v 0.163108 0.030089 0.302398
v 0.161945 0.028823 0.288073
v 0.161170 0.032346 0.278821
v 0.186961 0.085720 0.302398
v 0.186695 0.086341 0.289296
v 0.186131 0.087657 0.280532
v 0.174792 0.057339 0.302398
v 0.174526 0.057960 0.289296
v 0.168726 0.043191 0.302398
v 0.168193 0.043191 0.289296
v 0.171983 0.050788 0.302398
v 0.171717 0.051408 0.289296
v 0.173650 0.060002 0.279676
v 0.163592 0.042332 0.275149
v 0.160879 0.046127 0.268312
v 0.169782 0.055898 0.275663
v 0.163059 0.056293 0.266785
v 0.179962 0.069396 0.302398
v 0.179429 0.069396 0.289296
v 0.184152 0.079169 0.302398
v 0.183886 0.079789 0.289296
v 0.175575 0.069407 0.275663
v 0.173360 0.073782 0.268694
v 0.181764 0.082973 0.276176
v 0.175228 0.082498 0.267358
v 0.171487 0.065047 0.270941
v 0.166624 0.069407 0.265785
v 0.165880 0.082498 0.262600
v 0.147645 -0.005974 0.302398
v 0.147378 -0.005354 0.289296
v 0.151872 0.003884 0.302398
v 0.151339 0.003884 0.289296
v 0.144836 -0.012526 0.302398
v 0.144569 -0.011905 0.289296
v 0.146817 -0.004044 0.280541
v 0.148238 0.004775 0.276181
v 0.146526 0.009736 0.269230
v 0.142446 -0.008734 0.276181
v 0.135911 -0.009218 0.267364
v 0.144654 0.001001 0.271806
v 0.140042 0.004775 0.266407
v 0.157005 0.015855 0.302398
v 0.157238 0.017844 0.288073
v 0.159297 0.023612 0.282891
v 0.153180 0.016986 0.276193
v 0.148081 0.016986 0.268049
v 0.157799 0.028823 0.275149
v 0.150890 0.030089 0.266279
v 0.139676 0.016986 0.263463
v 0.139676 0.030089 0.261267
v 0.126573 -0.009218 0.262607
v 0.126573 0.003884 0.260810
v 0.113471 -0.009218 0.259704
v 0.113471 0.003884 0.259362
v 0.126573 0.016986 0.259874
v 0.126573 0.030089 0.259448
v 0.113471 0.016986 0.259278
v 0.113471 0.030089 0.259278
v 0.159007 0.037392 0.270086
v 0.153895 0.042332 0.265312
v 0.152778 0.056293 0.261858
v 0.139676 0.043191 0.260045
v 0.139676 0.056293 0.259533
v 0.152778 0.069396 0.260350
v 0.152778 0.082498 0.259702
v 0.139676 0.069396 0.259278
v 0.139676 0.082498 0.259278
v 0.126573 0.043191 0.259278
v 0.126573 0.056293 0.259278
v 0.113471 0.043191 0.259278
v 0.113471 0.056293 0.259278
v 0.126573 0.069396 0.259278
v 0.126573 0.082498 0.259278
v 0.113471 0.069396 0.259278
v 0.113471 0.082498 0.259278
v 0.199130 0.114101 0.302398
v 0.198966 0.114485 0.291596
v 0.191197 0.095600 0.302398
v 0.190665 0.095600 0.289296
v 0.196321 0.107550 0.302398
v 0.196556 0.109552 0.288056
v 0.187557 0.096482 0.276176
v 0.185840 0.101438 0.269221
v 0.192506 0.108703 0.276193
v 0.187397 0.108703 0.268040
v 0.202433 0.121805 0.302398
v 0.201263 0.120530 0.288056
v 0.208051 0.134907 0.302398
v 0.207519 0.134907 0.289296
v 0.198611 0.115313 0.282862
v 0.200483 0.124047 0.278812
v 0.202910 0.134039 0.275144
v 0.200192 0.137828 0.268308
v 0.197118 0.120530 0.275144
v 0.190206 0.121805 0.266275
v 0.198320 0.129093 0.270077
v 0.193205 0.134039 0.265308
v 0.183967 0.092703 0.271797
v 0.179353 0.096482 0.266399
v 0.178982 0.108703 0.263452
v 0.165880 0.095600 0.260805
v 0.165880 0.108703 0.259873
v 0.178982 0.121805 0.261262
v 0.178982 0.134907 0.260043
v 0.165880 0.121805 0.259447
v 0.165880 0.134907 0.259278
v 0.211299 0.142483 0.302398
v 0.211034 0.143103 0.289296
v 0.209100 0.147605 0.275657
v 0.202375 0.148010 0.266779
v 0.210800 0.156749 0.270932
v 0.205935 0.161115 0.265780
v 0.192085 0.148010 0.261851
v 0.192085 0.161112 0.260346
v 0.205187 0.174214 0.262592
v 0.205187 0.187317 0.260800
v 0.192085 0.174214 0.259700
v 0.192085 0.187317 0.259361
v 0.178982 0.148010 0.259532
v 0.178982 0.161112 0.259278
v 0.165880 0.148010 0.259278
v 0.165880 0.161112 0.259278
v 0.178982 0.174214 0.259278
v 0.178982 0.187317 0.259278
v 0.165880 0.174214 0.259278
v 0.165880 0.187317 0.259278
v 0.152778 0.095600 0.259361
v 0.152778 0.108703 0.259278
v 0.139676 0.095600 0.259278
v 0.139676 0.108703 0.259278
v 0.152778 0.121805 0.259278
v 0.152778 0.134907 0.259278
v 0.139676 0.121805 0.259278
v 0.139676 0.134907 0.259278
v 0.126573 0.095600 0.259278
v 0.126573 0.108703 0.259278
v 0.113471 0.095600 0.259278
v 0.113471 0.108703 0.259278
v 0.126573 0.121805 0.259278
v 0.126573 0.134907 0.259278
v 0.113471 0.121805 0.259278
v 0.113471 0.134907 0.259442
v 0.152778 0.148010 0.259278
v 0.152778 0.161112 0.259278
v 0.139676 0.148010 0.259278
v 0.139676 0.161112 0.259278
v 0.152778 0.174214 0.259278
v 0.152778 0.187317 0.259278
v 0.139676 0.174214 0.259278
v 0.139676 0.187317 0.259278
v 0.126573 0.148010 0.259278
v 0.126573 0.161112 0.259356
v 0.113471 0.148010 0.259863
v 0.113471 0.161112 0.260775
v 0.126573 0.174214 0.259690
v 0.126573 0.187317 0.260321
v 0.113471 0.174214 0.262548
v 0.107817 0.191772 0.270877
v 0.112699 0.187369 0.265746
v 0.238446 0.205796 0.302398
v 0.238279 0.206187 0.291566
v 0.241759 0.213521 0.302398
v 0.240582 0.212237 0.288037
v 0.239797 0.215749 0.278803
v 0.253425 0.240728 0.302398
v 0.253159 0.241348 0.289296
v 0.247377 0.226624 0.302398
v 0.246845 0.226624 0.289296
v 0.250616 0.234177 0.302398
v 0.250350 0.234797 0.289296
v 0.252277 0.243404 0.279658
v 0.242229 0.225747 0.275139
v 0.239506 0.229530 0.268304
v 0.248419 0.239313 0.275652
v 0.241692 0.239726 0.268126
v 0.235637 0.199245 0.302398
v 0.235875 0.201259 0.288037
v 0.237925 0.207014 0.282832
v 0.231832 0.200419 0.276193
v 0.226714 0.200419 0.268030
v 0.236437 0.212237 0.275139
v 0.229523 0.213521 0.266272
v 0.218290 0.200419 0.263441
v 0.218290 0.213521 0.261257
v 0.237633 0.220795 0.270068
v 0.232516 0.225747 0.265380
v 0.231392 0.239726 0.265369
v 0.218290 0.226624 0.260482
v 0.218290 0.239726 0.264129
v 0.253425 0.250434 0.302398
v 0.253159 0.250189 0.289296
v 0.244494 0.254591 0.302398
v 0.244494 0.254102 0.289296
v 0.252277 0.248722 0.279658
v 0.245245 0.249485 0.275652
v 0.241379 0.246734 0.268959
v 0.231392 0.254591 0.302398
v 0.231392 0.254102 0.289296
v 0.218290 0.254591 0.302398
v 0.218290 0.254102 0.289296
v 0.231392 0.250629 0.276193
v 0.231392 0.246962 0.268617
v 0.218290 0.250629 0.276193
v 0.218290 0.246962 0.268617
v 0.205187 0.200419 0.259871
v 0.205187 0.213521 0.259446
v 0.192085 0.200419 0.259278
v 0.192085 0.213521 0.259278
v 0.205187 0.226624 0.259972
v 0.205187 0.239726 0.264129
v 0.192085 0.226624 0.259972
v 0.192085 0.239726 0.264129
v 0.178982 0.200419 0.259278
v 0.178982 0.213521 0.259278
v 0.165880 0.200419 0.259278
v 0.165880 0.213521 0.259278
v 0.178982 0.226624 0.259972
v 0.178982 0.239726 0.264129
v 0.165880 0.226624 0.259972
v 0.165880 0.239726 0.264129
v 0.205187 0.254591 0.302398
v 0.205187 0.254102 0.289296
v 0.192085 0.254591 0.302398
v 0.192085 0.254102 0.289296
v 0.205187 0.250629 0.276193
v 0.205187 0.246962 0.268617
v 0.192085 0.250629 0.276193
v 0.192085 0.246962 0.268617
v 0.178982 0.254591 0.302398
v 0.178982 0.254102 0.289296
v 0.165880 0.254591 0.302398
v 0.165880 0.254102 0.289296
v 0.178982 0.250629 0.276193
v 0.178982 0.246962 0.268617
v 0.165880 0.250629 0.276193
v 0.165880 0.246962 0.268617
v 0.152778 0.200419 0.259278
v 0.152778 0.213521 0.259278
v 0.139676 0.200419 0.259526
v 0.139676 0.213521 0.260030
v 0.152778 0.226624 0.259972
v 0.152778 0.239726 0.264129
v 0.139676 0.226624 0.261409
v 0.139676 0.239726 0.265202
v 0.107294 0.206097 0.302398
v 0.107559 0.205476 0.289296
v 0.110471 0.213521 0.302398
v 0.111002 0.213521 0.289296
v 0.126573 0.200419 0.261805
v 0.120290 0.219447 0.270011
v 0.125423 0.214456 0.265281
v 0.109480 0.200883 0.275624
v 0.116218 0.200419 0.266739
v 0.115666 0.214456 0.275104
v 0.118421 0.210712 0.268280
v 0.122256 0.241057 0.302398
v 0.122522 0.240436 0.289296
v 0.116079 0.226624 0.302398
v 0.116610 0.226624 0.289296
v 0.119452 0.234506 0.302398
v 0.119718 0.233885 0.289296
v 0.121826 0.226624 0.273106
v 0.128377 0.226624 0.266245
v 0.124814 0.238452 0.277433
v 0.131181 0.239726 0.267959
v 0.118582 0.226624 0.279657
v 0.119997 0.233234 0.282627
v 0.152778 0.254591 0.302398
v 0.152778 0.254102 0.289296
v 0.139676 0.254591 0.302398
v 0.139676 0.254102 0.289296
v 0.152778 0.250629 0.276193
v 0.152778 0.246962 0.268617
v 0.139676 0.250629 0.276193
v 0.139676 0.246962 0.268757
v 0.128807 0.250434 0.302398
v 0.129073 0.250189 0.289296
v 0.130961 0.248453 0.276193
v 0.132763 0.246734 0.269145
v 0.100368 -0.009218 0.259278
v 0.100368 0.003884 0.259278
v 0.087266 -0.009218 0.259278
v 0.087266 0.003884 0.259278
v 0.100368 0.016986 0.259278
v 0.100368 0.030089 0.259278
v 0.087266 0.016986 0.259278
v 0.087266 0.030089 0.259278
v 0.074164 -0.009218 0.259278
v 0.074164 0.003884 0.259278
v 0.061061 -0.009218 0.259278
v 0.061061 0.003884 0.259278
v 0.074164 0.016986 0.259278
v 0.074164 0.030089 0.259278
v 0.061061 0.016986 0.259531
v 0.061061 0.030089 0.260040
v 0.100368 0.043191 0.259278
v 0.100368 0.056293 0.259278
v 0.087266 0.043191 0.259278
v 0.087266 0.056293 0.259278
v 0.100368 0.069396 0.259278
v 0.100368 0.082498 0.259278
v 0.087266 0.069396 0.259358
v 0.087266 0.082498 0.259695
v 0.074164 0.043191 0.259445
v 0.074164 0.056293 0.259868
v 0.061061 0.043191 0.261251
v 0.061061 0.056293 0.263421
v 0.055855 0.085907 0.302398
v 0.056121 0.085286 0.289296
v 0.074164 0.069396 0.260789
v 0.074164 0.082498 0.262570
v 0.056055 0.072338 0.271768
v 0.060678 0.068540 0.266373
v 0.058236 0.082054 0.276159
v 0.064780 0.082498 0.267335
v 0.047959 -0.009218 0.259700
v 0.047959 0.003884 0.260343
v 0.034857 -0.009218 0.262592
v 0.029239 0.008254 0.270927
v 0.034107 0.003885 0.265777
v 0.028734 0.022537 0.302398
v 0.029000 0.021915 0.289296
v 0.031966 0.030089 0.302398
v 0.032498 0.030089 0.289296
v 0.047959 0.016986 0.261844
v 0.041713 0.035928 0.270061
v 0.046831 0.030972 0.265303
v 0.030931 0.017399 0.275654
v 0.037659 0.016986 0.266773
v 0.037118 0.030972 0.275135
v 0.039843 0.027193 0.268303
v 0.016575 -0.005873 0.302398
v 0.016841 -0.006494 0.289296
v 0.020751 0.003884 0.302398
v 0.021283 0.003884 0.289296
v 0.013771 -0.012424 0.302398
v 0.014037 -0.013045 0.289296
v 0.018962 -0.009687 0.276174
v 0.025501 -0.009218 0.267352
v 0.025148 0.003885 0.275654
v 0.027370 -0.000482 0.268689
v 0.014603 -0.014368 0.280528
v 0.025930 0.015985 0.302398
v 0.026196 0.015364 0.289296
v 0.027076 0.013307 0.279662
v 0.041419 0.049716 0.282795
v 0.043696 0.057497 0.302398
v 0.043458 0.055465 0.288016
v 0.037574 0.043191 0.302398
v 0.038759 0.044486 0.288016
v 0.040892 0.050946 0.302398
v 0.041064 0.050545 0.291530
v 0.042901 0.044486 0.275135
v 0.049818 0.043191 0.266267
v 0.047488 0.056293 0.276193
v 0.052621 0.056293 0.268013
v 0.039550 0.040982 0.278796
v 0.048788 0.069396 0.302398
v 0.049320 0.069396 0.289296
v 0.053051 0.079356 0.302398
v 0.053317 0.078735 0.289296
v 0.052452 0.068540 0.276159
v 0.054186 0.063603 0.269195
v 0.053892 0.077391 0.280502
v 0.100368 0.095600 0.259278
v 0.100368 0.108703 0.259528
v 0.087266 0.095600 0.260332
v 0.087266 0.108703 0.261824
v 0.100368 0.121805 0.260035
v 0.100368 0.134907 0.261238
v 0.081001 0.127687 0.270036
v 0.086128 0.122714 0.265292
v 0.082546 0.134907 0.273188
v 0.089097 0.134907 0.266256
v 0.068014 0.114317 0.302398
v 0.068280 0.113696 0.289296
v 0.060004 0.095600 0.302398
v 0.060535 0.095600 0.289296
v 0.065210 0.107766 0.302398
v 0.065476 0.107144 0.289296
v 0.068528 0.100013 0.270902
v 0.073403 0.095627 0.265762
v 0.070206 0.109141 0.275639
v 0.076939 0.108703 0.266756
v 0.064422 0.095627 0.275639
v 0.066659 0.091278 0.268678
v 0.066365 0.105066 0.279637
v 0.071218 0.121805 0.302398
v 0.071750 0.121805 0.289296
v 0.076826 0.134907 0.302398
v 0.077358 0.134907 0.289296
v 0.076392 0.122714 0.275120
v 0.079132 0.118952 0.268292
v 0.079302 0.134907 0.279739
v 0.082976 0.149278 0.302398
v 0.083242 0.148656 0.289296
v 0.088041 0.161112 0.302398
v 0.088573 0.161112 0.289296
v 0.100368 0.148010 0.263388
v 0.095343 0.164097 0.271742
v 0.099974 0.160282 0.266349
v 0.085540 0.146710 0.277484
v 0.091901 0.148010 0.267986
v 0.091727 0.160282 0.276143
v 0.093474 0.155362 0.269170
v 0.095135 0.177687 0.302398
v 0.095401 0.177066 0.289296
v 0.099256 0.187317 0.302398
v 0.099787 0.187317 0.289296
v 0.092331 0.171136 0.302398
v 0.092597 0.170515 0.289296
v 0.097510 0.173796 0.276143
v 0.104060 0.174214 0.267319
v 0.103696 0.187369 0.275624
v 0.105947 0.183037 0.268667
v 0.093181 0.169150 0.280477
v 0.080173 0.142726 0.302398
v 0.080438 0.142105 0.289296
v 0.080708 0.141476 0.282711
v -0.010275 -0.014065 0.302398
v -0.010542 -0.014690 0.289296
v -0.013066 -0.007514 0.302398
v -0.013331 -0.008139 0.289296
v -0.017920 0.003884 0.302398
v -0.018452 0.003884 0.289296
v -0.010872 -0.015466 0.282148
v -0.015594 -0.010347 0.277146
v -0.021995 -0.009218 0.267791
v -0.021771 0.003244 0.276027
v -0.023628 -0.001551 0.268988
v -0.022407 0.014420 0.302398
v -0.022673 0.013795 0.289296
v -0.023327 0.012258 0.280284
v -0.030655 -0.009218 0.263157
v -0.025488 0.007184 0.271549
v -0.030176 0.003244 0.266171
v -0.043757 -0.009218 0.259826
v -0.043757 0.003884 0.260669
v -0.025197 0.020971 0.302398
v -0.025463 0.020346 0.289296
v -0.029080 0.030089 0.302398
v -0.029612 0.030089 0.289296
v -0.027531 0.016770 0.276027
v -0.034127 0.016986 0.267182
v -0.033708 0.030360 0.275492
v -0.036083 0.026174 0.268574
v -0.043757 0.016986 0.262370
v -0.037943 0.034909 0.270658
v -0.042889 0.030360 0.265613
v -0.034538 0.042904 0.302398
v -0.034804 0.042280 0.289296
v -0.037328 0.049455 0.302398
v -0.037594 0.048831 0.289296
v -0.040240 0.056293 0.302398
v -0.040773 0.056293 0.289296
v -0.035782 0.039983 0.279392
v -0.039468 0.043887 0.275492
v -0.046258 0.043191 0.266585
v -0.045645 0.057477 0.274958
v -0.048538 0.053899 0.268176
v -0.045821 0.069396 0.302398
v -0.046353 0.069396 0.289296
v -0.049459 0.077940 0.302398
v -0.049726 0.077315 0.289296
v -0.048597 0.069396 0.278830
v -0.050097 0.076443 0.281769
v -0.056859 -0.009218 0.259278
v -0.056859 0.003884 0.259335
v -0.069962 -0.009218 0.259278
v -0.069962 0.003884 0.259278
v -0.056859 0.016986 0.259648
v -0.056859 0.030089 0.260225
v -0.069962 0.016986 0.259278
v -0.069962 0.030089 0.259278
v -0.083064 -0.009218 0.259278
v -0.083064 0.003884 0.259278
v -0.096167 -0.009218 0.259278
v -0.096167 0.003884 0.259278
v -0.083064 0.016986 0.259278
v -0.083064 0.030089 0.259278
v -0.096167 0.016986 0.259278
v -0.096167 0.030089 0.259278
v -0.056859 0.043191 0.261627
v -0.050398 0.062633 0.269766
v -0.055603 0.057477 0.265180
v -0.069962 0.043191 0.259502
v -0.069962 0.056293 0.259981
v -0.052250 0.084491 0.302398
v -0.052516 0.083866 0.289296
v -0.051838 0.069396 0.272279
v -0.058389 0.069396 0.266132
v -0.054754 0.081485 0.276918
v -0.061179 0.082498 0.267703
v -0.069962 0.069396 0.261086
v -0.069962 0.082498 0.263047
v -0.083064 0.043191 0.259278
v -0.083064 0.056293 0.259278
v -0.096167 0.043191 0.259278
v -0.096167 0.056293 0.259278
v -0.083064 0.069396 0.259413
v -0.083064 0.082498 0.259804
v -0.096167 0.069396 0.259278
v -0.096167 0.082498 0.259278
v -0.056981 0.095600 0.302398
v -0.057513 0.095600 0.289296
v -0.061591 0.106425 0.302398
v -0.061857 0.105800 0.289296
v -0.064381 0.112976 0.302398
v -0.064647 0.112351 0.289296
v -0.060930 0.095076 0.275960
v -0.062853 0.090358 0.268921
v -0.062553 0.104167 0.280171
v -0.064713 0.099093 0.271436
v -0.069433 0.095076 0.266092
v -0.066691 0.108602 0.275960
v -0.073311 0.108703 0.267106
v -0.068141 0.121805 0.302398
v -0.068673 0.121805 0.289296
v -0.073721 0.134907 0.302398
v -0.074492 0.135719 0.288968
v -0.072867 0.122192 0.275424
v -0.075308 0.118083 0.268523
v -0.075007 0.131892 0.279279
v -0.083064 0.095600 0.260609
v -0.083064 0.108703 0.262272
v -0.096167 0.095600 0.259324
v -0.096167 0.108703 0.259626
v -0.076867 0.140627 0.284381
v -0.077168 0.126818 0.270544
v -0.082147 0.122192 0.265543
v -0.078628 0.135719 0.275424
v -0.085442 0.134907 0.266510
v -0.096167 0.121805 0.260176
v -0.096167 0.134907 0.261540
v -0.076512 0.141461 0.302398
v -0.076513 0.141460 0.293116
v -0.079302 0.148012 0.302398
v -0.079170 0.146700 0.288968
v -0.084882 0.161112 0.302398
v -0.085414 0.161112 0.289296
v -0.084804 0.149309 0.274890
v -0.087763 0.145808 0.268125
v -0.087780 0.161112 0.278460
v -0.089623 0.154542 0.269653
v -0.094861 0.149309 0.265131
v -0.091022 0.161112 0.271909
v -0.097573 0.161112 0.266084
v -0.088644 0.169945 0.302398
v -0.088910 0.169321 0.289296
v -0.091434 0.176496 0.302398
v -0.091700 0.175872 0.289296
v -0.096042 0.187317 0.302398
v -0.096574 0.187317 0.289296
v -0.089322 0.168352 0.281388
v -0.093913 0.173317 0.276690
v -0.100363 0.174214 0.267628
v -0.100089 0.186907 0.275892
v -0.102078 0.182267 0.268871
v 0.104490 0.199546 0.302398
v 0.104755 0.198924 0.289296
v 0.105654 0.196825 0.279612
v -0.100775 0.198430 0.302398
v -0.101041 0.197805 0.289296
v -0.101777 0.196077 0.280058
v -0.109269 -0.009218 0.259516
v -0.109269 0.003884 0.259278
v -0.122371 -0.009218 0.261750
v -0.122371 0.003884 0.260305
v -0.109269 0.016986 0.259278
v -0.109269 0.030089 0.259278
v -0.122371 0.016986 0.259693
v -0.122371 0.030089 0.259359
v -0.141727 -0.015061 0.302398
v -0.141462 -0.014430 0.289296
v -0.144479 -0.008510 0.302398
v -0.144214 -0.007879 0.289296
v -0.149686 0.003884 0.302398
v -0.149155 0.003884 0.289296
v -0.139544 -0.009740 0.275607
v -0.132786 -0.009218 0.266695
v -0.141150 -0.000586 0.270849
v -0.136259 0.003822 0.265736
v -0.143307 -0.005720 0.279584
v -0.145241 0.003822 0.275607
v -0.142985 0.008149 0.268672
v -0.153782 0.013637 0.302398
v -0.153517 0.014268 0.289296
v -0.135474 0.016986 0.262572
v -0.135474 0.030089 0.260805
v -0.151389 0.017462 0.276185
v -0.144841 0.016986 0.267340
v -0.153555 0.027281 0.271812
v -0.148943 0.031025 0.266436
v -0.109269 0.043191 0.259278
v -0.109269 0.056293 0.259278
v -0.122371 0.043191 0.259278
v -0.122371 0.056293 0.259278
v -0.109269 0.069396 0.259278
v -0.109269 0.082498 0.259278
v -0.122371 0.069396 0.259278
v -0.122371 0.082498 0.259278
v -0.135474 0.043191 0.259885
v -0.135474 0.056293 0.259455
v -0.148576 0.043191 0.263544
v -0.148576 0.056293 0.261320
v -0.135474 0.069396 0.259278
v -0.135474 0.082498 0.259278
v -0.148576 0.069396 0.260077
v -0.148576 0.082498 0.259572
v -0.156534 0.020188 0.302398
v -0.156269 0.020820 0.289296
v -0.160693 0.030089 0.302398
v -0.160162 0.030089 0.289296
v -0.155712 0.022147 0.280547
v -0.157086 0.031025 0.276185
v -0.155389 0.036016 0.269281
v -0.165837 0.042335 0.302398
v -0.166035 0.044159 0.288303
v -0.168116 0.050014 0.283273
v -0.168589 0.048886 0.302398
v -0.168469 0.049171 0.292008
v -0.171701 0.056293 0.302398
v -0.170650 0.055146 0.288303
v -0.161900 0.043191 0.276193
v -0.156896 0.043191 0.268119
v -0.166537 0.055146 0.275245
v -0.159648 0.056293 0.266325
v -0.169950 0.058749 0.278979
v -0.177205 0.069396 0.302398
v -0.176673 0.069396 0.289296
v -0.180644 0.077584 0.302398
v -0.180379 0.078216 0.289296
v -0.167793 0.063883 0.270244
v -0.162727 0.068708 0.265392
v -0.161678 0.082498 0.262047
v -0.172234 0.068708 0.275245
v -0.169628 0.072618 0.268403
v -0.178382 0.082348 0.275823
v -0.171703 0.082498 0.266935
v -0.183396 0.084135 0.302398
v -0.183131 0.084767 0.289296
v -0.182354 0.086616 0.279943
v -0.109269 0.095600 0.259278
v -0.109269 0.108703 0.259278
v -0.122371 0.095600 0.259278
v -0.122371 0.108703 0.259278
v -0.109269 0.121805 0.259278
v -0.109269 0.134907 0.259491
v -0.122371 0.121805 0.259278
v -0.122371 0.134907 0.259278
v -0.135474 0.095600 0.259278
v -0.135474 0.108703 0.259278
v -0.148576 0.095600 0.259299
v -0.148576 0.108703 0.259278
v -0.135474 0.121805 0.259278
v -0.135474 0.134907 0.259278
v -0.148576 0.121805 0.259278
v -0.148576 0.134907 0.259278
v -0.109269 0.148010 0.259959
v -0.109269 0.161112 0.261025
v -0.122371 0.148010 0.259278
v -0.122371 0.161112 0.259402
v -0.109269 0.174214 0.262949
v -0.103938 0.191002 0.271323
v -0.108691 0.186907 0.266022
v -0.122371 0.174214 0.259781
v -0.122371 0.187317 0.260549
v -0.135474 0.148010 0.259278
v -0.135474 0.161112 0.259278
v -0.148576 0.148010 0.259278
v -0.148576 0.161112 0.259278
v -0.135474 0.174214 0.259278
v -0.135474 0.187317 0.259313
v -0.148576 0.174214 0.259278
v -0.148576 0.187317 0.259278
v -0.161678 0.095600 0.260482
v -0.161678 0.108703 0.259765
v -0.180197 0.091750 0.271208
v -0.175410 0.095911 0.265958
v -0.174781 0.108703 0.262885
v -0.161678 0.121805 0.259395
v -0.161678 0.134907 0.259278
v -0.174781 0.121805 0.260997
v -0.174781 0.134907 0.259957
v -0.188212 0.095600 0.302398
v -0.187681 0.095600 0.289296
v -0.192699 0.106282 0.302398
v -0.192434 0.106914 0.289296
v -0.195451 0.112833 0.302398
v -0.195185 0.113465 0.289296
v -0.184079 0.095911 0.275823
v -0.182032 0.100485 0.268833
v -0.190228 0.109550 0.276603
v -0.183758 0.108703 0.267580
v -0.194758 0.114483 0.281244
v -0.199219 0.121805 0.302398
v -0.198689 0.121805 0.289296
v -0.204723 0.134907 0.302398
v -0.204192 0.134907 0.289296
v -0.192601 0.119617 0.272509
v -0.188094 0.123113 0.266777
v -0.187883 0.134907 0.264005
v -0.195925 0.123113 0.276603
v -0.194436 0.128352 0.269640
v -0.200426 0.134907 0.276193
v -0.195813 0.134907 0.268508
v -0.161678 0.148010 0.259278
v -0.161678 0.161112 0.259278
v -0.174781 0.148010 0.259491
v -0.174781 0.161112 0.259278
v -0.161678 0.174214 0.259278
v -0.161678 0.187317 0.259278
v -0.174781 0.174214 0.259278
v -0.174781 0.187317 0.259278
v -0.207506 0.141532 0.302398
v -0.207241 0.142163 0.289296
v -0.187883 0.148010 0.261561
v -0.187883 0.161112 0.260199
v -0.205375 0.147234 0.275460
v -0.198565 0.148010 0.266531
v -0.206840 0.156219 0.270604
v -0.201877 0.160797 0.265585
v -0.187883 0.174214 0.259644
v -0.187883 0.187317 0.259335
v -0.200985 0.174214 0.262359
v -0.200985 0.187317 0.260674
v -0.210257 0.148083 0.302398
v -0.209992 0.148715 0.289296
v -0.215731 0.161112 0.302398
v -0.215199 0.161112 0.289296
v -0.208997 0.151084 0.279339
v -0.211072 0.160797 0.275460
v -0.208674 0.164954 0.268563
v -0.219561 0.170230 0.302398
v -0.219296 0.170862 0.289296
v -0.222313 0.176781 0.302398
v -0.222047 0.177413 0.289296
v -0.226738 0.187317 0.302398
v -0.226207 0.187317 0.289296
v -0.217221 0.174436 0.276038
v -0.210619 0.174214 0.267176
v -0.219244 0.184086 0.271567
v -0.214561 0.187999 0.266204
v -0.221401 0.178952 0.280302
v -0.222918 0.187999 0.276038
v -0.221079 0.192821 0.269035
v -0.103565 0.204981 0.302398
v -0.103831 0.204357 0.289296
v -0.107203 0.213521 0.302398
v -0.107734 0.213521 0.289296
v -0.105850 0.200434 0.275892
v -0.112495 0.200419 0.267031
v -0.112026 0.214024 0.275357
v -0.114533 0.209992 0.268473
v -0.122371 0.200419 0.262174
v -0.116394 0.218727 0.270431
v -0.121405 0.214024 0.265474
v -0.112783 0.226624 0.302398
v -0.113652 0.227551 0.288740
v -0.115696 0.233465 0.302398
v -0.115738 0.233369 0.292737
v -0.116092 0.232537 0.284002
v -0.118487 0.240017 0.302398
v -0.118329 0.238532 0.288740
v -0.114232 0.223801 0.279166
v -0.117787 0.227551 0.275357
v -0.124626 0.226624 0.266434
v -0.122668 0.239726 0.276193
v -0.127416 0.239726 0.268390
v -0.135474 0.200419 0.259603
v -0.135474 0.213521 0.260127
v -0.148576 0.200419 0.259278
v -0.148576 0.213521 0.259278
v -0.135474 0.226624 0.261599
v -0.135474 0.239726 0.265634
v -0.148576 0.226624 0.259972
v -0.148576 0.239726 0.264129
v -0.125038 0.250434 0.302398
v -0.125303 0.250189 0.289296
v -0.127190 0.248242 0.276193
v -0.128848 0.246451 0.269540
v -0.135474 0.254591 0.302398
v -0.135474 0.254102 0.289296
v -0.148576 0.254591 0.302398
v -0.148576 0.254102 0.289296
v -0.135474 0.250418 0.276193
v -0.135474 0.246750 0.269053
v -0.148576 0.250629 0.276193
v -0.148576 0.246962 0.268617
v -0.161678 0.200419 0.259278
v -0.161678 0.213521 0.259278
v -0.174781 0.200419 0.259278
v -0.174781 0.213521 0.259278
v -0.161678 0.226624 0.259972
v -0.161678 0.239726 0.264129
v -0.174781 0.226624 0.259972
v -0.174781 0.239726 0.264129
v -0.187883 0.200419 0.259278
v -0.187883 0.213521 0.259278
v -0.200985 0.200419 0.259836
v -0.200985 0.213521 0.259431
v -0.187883 0.226624 0.259972
v -0.187883 0.239726 0.264129
v -0.200985 0.226624 0.259972
v -0.200985 0.239726 0.264129
v -0.161678 0.254591 0.302398
v -0.161678 0.254102 0.289296
v -0.174781 0.254591 0.302398
v -0.174781 0.254102 0.289296
v -0.161678 0.250629 0.276193
v -0.161678 0.246962 0.268617
v -0.174781 0.250629 0.276193
v -0.174781 0.246962 0.268617
v -0.187883 0.254591 0.302398
v -0.187883 0.254102 0.289296
v -0.200985 0.254591 0.302398
v -0.200985 0.254102 0.289296
v -0.187883 0.250629 0.276193
v -0.187883 0.246962 0.268617
v -0.200985 0.250629 0.276193
v -0.200985 0.246962 0.268617
v -0.231616 0.198928 0.302398
v -0.231350 0.199560 0.289296
v -0.214088 0.200419 0.263229
v -0.214088 0.213521 0.261189
v -0.229066 0.201638 0.277327
v -0.222674 0.200419 0.267853
v -0.231977 0.213521 0.272964
v -0.225426 0.213521 0.266218
v -0.214088 0.226624 0.260473
v -0.214088 0.239726 0.264129
v -0.233483 0.220688 0.269999
v -0.228345 0.225683 0.265366
v -0.227190 0.239726 0.265361
v -0.234367 0.205479 0.302398
v -0.234102 0.206111 0.289296
v -0.237746 0.213521 0.302398
v -0.237215 0.213521 0.289296
v -0.233805 0.206819 0.282450
v -0.235213 0.213521 0.279516
v -0.243249 0.226624 0.302398
v -0.242718 0.226624 0.289296
v -0.246423 0.234177 0.302398
v -0.246157 0.234809 0.289296
v -0.249174 0.240728 0.302398
v -0.248909 0.241360 0.289296
v -0.238065 0.225683 0.275097
v -0.235317 0.229423 0.268293
v -0.244213 0.239322 0.275676
v -0.237481 0.239726 0.268118
v -0.248044 0.243420 0.279698
v -0.214088 0.254591 0.302398
v -0.214088 0.254102 0.289296
v -0.227190 0.254591 0.302398
v -0.227190 0.254102 0.289296
v -0.214088 0.250629 0.276193
v -0.214088 0.246962 0.268617
v -0.227190 0.250629 0.276193
v -0.227190 0.246962 0.268617
v -0.240293 0.254591 0.302398
v -0.240293 0.254102 0.289296
v -0.249174 0.250434 0.302398
v -0.248909 0.250189 0.289296
v -0.241028 0.249485 0.275676
v -0.237152 0.246734 0.268959
v -0.248044 0.248722 0.279698
vn 0.6927 -0.2843 0.6628
vn 0.8528 -0.3478 0.3896
vn 0.8401 -0.3568 0.4086
vn 0.6492 -0.2543 0.7169
vn 0.9184 -0.3744 0.1277
vn 0.9190 -0.3938 0.0189
vn 0.9180 -0.3962 0.0185
vn 0.9037 -0.4024 0.1466
vn 0.9178 -0.3941 0.0479
vn 0.9187 -0.3945 0.0175
vn 0.9093 -0.3996 0.1167
vn 0.9189 -0.3940 0.0186
vn 0.8831 -0.3868 0.2656
vn 0.9069 -0.4004 0.1314
vn 0.9141 -0.3823 0.1350
vn 0.5597 -0.2359 0.7944
vn 0.8095 -0.3498 0.4716
vn 0.7174 -0.3286 0.6143
vn 0.4732 -0.2097 0.8556
vn 0.6466 -0.2650 0.7153
vn 0.8368 -0.3423 0.4273
vn 0.8837 -0.3458 0.3155
vn 0.9181 -0.3723 0.1360
vn 0.9197 -0.3921 0.0183
vn 0.9188 -0.3942 0.0189
vn 0.9116 -0.3850 0.1440
vn 0.5828 -0.2453 0.7747
vn 0.8211 -0.3701 0.4344
vn 0.7387 -0.3368 0.5839
vn 0.5045 -0.2224 0.8343
vn 0.2189 -0.0913 0.9715
vn 0.3061 -0.1337 0.9426
vn 0.6664 -0.2785 0.6916
vn 0.8442 -0.3495 0.4065
vn 0.8768 -0.3863 0.2862
vn 0.9020 -0.4073 0.1429
vn 0.8840 -0.3951 0.2501
vn 0.3530 -0.6087 0.7106
vn 0.1176 -0.6603 0.7417
vn 0.1233 -0.9142 0.3861
vn 0.4854 -0.7654 0.4225
vn 0.4263 -0.8920 0.1501
vn 0.1280 -0.9795 0.1553
vn 0.1170 -0.9929 0.0219
vn 0.4348 -0.9001 0.0257
vn 0.7865 -0.6045 0.1267
vn 0.7926 -0.6093 0.0227
vn 0.7719 -0.5651 0.2914
vn 0.6867 -0.2889 0.6671
vn 0.8317 -0.3799 0.4049
vn 0.8404 -0.3567 0.4081
vn 0.6474 -0.2576 0.7173
vn 0.9185 -0.3742 0.1276
vn 0.9179 -0.3964 0.0183
vn 0.9037 -0.4024 0.1464
vn 0.9178 -0.3942 0.0475
vn 0.9187 -0.3945 0.0172
vn 0.5603 -0.2362 0.7939
vn 0.8097 -0.3501 0.4710
vn 0.7179 -0.3288 0.6136
vn 0.4739 -0.2100 0.8552
vn 0.6471 -0.2653 0.7147
vn 0.8370 -0.3424 0.4269
vn 0.8837 -0.3461 0.3151
vn 0.9181 -0.3724 0.1357
vn 0.9198 -0.3919 0.0182
vn 0.9117 -0.3849 0.1439
vn 0.4682 -0.3316 0.8190
vn 0.3480 -0.1806 0.9199
vn 0.1291 -0.1374 0.9821
vn 0.1330 -0.3032 0.9436
vn 0.2765 -0.1161 0.9540
vn 0.1927 -0.0822 0.9778
vn 0.0362 -0.0199 0.9991
vn 0.0811 -0.0497 0.9955
vn 0.6836 -0.4501 0.5745
vn 0.8841 -0.3952 0.2493
vn -0.0674 -0.6617 0.7467
vn -0.1929 -0.6332 0.7496
vn -0.3299 -0.8143 0.4776
vn -0.0492 -0.9084 0.4152
vn -0.0208 -0.9857 0.1671
vn -0.2634 -0.9488 0.1742
vn -0.2716 -0.9623 0.0172
vn 0.0000 -0.9998 0.0186
vn -0.7237 -0.6733 0.1512
vn -0.7391 -0.6734 0.0157
vn -0.6973 -0.6363 0.3299
vn -0.0773 -0.3217 0.9437
vn -0.0635 -0.1342 0.9889
vn -0.2712 -0.1657 0.9482
vn -0.3417 -0.3529 0.8710
vn -0.0346 -0.0328 0.9989
vn -0.0158 -0.0103 0.9998
vn -0.1295 -0.0600 0.9898
vn -0.2109 -0.0880 0.9735
vn -0.5703 -0.2458 0.7838
vn -0.8214 -0.3634 0.4396
vn -0.8061 -0.3916 0.4438
vn -0.6221 -0.2646 0.7369
vn -0.9049 -0.3998 0.1457
vn -0.9218 -0.3872 0.0186
vn -0.9096 -0.4151 0.0172
vn -0.9041 -0.4028 0.1427
vn -0.9093 -0.3937 0.1348
vn -0.6057 -0.2467 0.7565
vn -0.8305 -0.3682 0.4179
vn -0.8450 -0.3425 0.4106
vn -0.6646 -0.2710 0.6963
vn -0.4988 -0.2155 0.8395
vn -0.7362 -0.3297 0.5910
vn -0.3302 -0.1379 0.9338
vn -0.9045 -0.4050 0.1339
vn -0.9161 -0.3768 0.1372
vn -0.5584 -0.5100 0.6543
vn -0.8783 -0.3797 0.2907
vn -0.9117 -0.3933 0.1189
vn -0.8849 -0.3805 0.2686
vn 0.9069 -0.4004 0.1312
vn 0.9142 -0.3822 0.1348
vn 0.6086 -0.2519 0.7524
vn 0.8295 -0.3745 0.4145
vn 0.7567 -0.3420 0.5572
vn 0.5362 -0.2343 0.8109
vn 0.6930 -0.2843 0.6626
vn 0.8529 -0.3477 0.3895
vn 0.8832 -0.3868 0.2654
vn 0.9093 -0.3995 0.1165
vn 0.9185 -0.3743 0.1277
vn 0.9015 -0.4122 0.1318
vn 0.6668 -0.2787 0.6911
vn 0.8443 -0.3496 0.4061
vn 0.8769 -0.3864 0.2859
vn 0.9178 -0.3941 0.0477
vn 0.9187 -0.3945 0.0173
vn 0.9198 -0.3920 0.0183
vn 0.9181 -0.3723 0.1358
vn 0.6469 -0.2652 0.7150
vn 0.8369 -0.3424 0.4271
vn 0.8212 -0.3702 0.4342
vn 0.5831 -0.2454 0.7745
vn 0.9116 -0.3850 0.1439
vn 0.9020 -0.4073 0.1428
vn 0.9069 -0.4004 0.1313
vn 0.6494 -0.2545 0.7166
vn 0.8403 -0.3567 0.4083
vn 0.8096 -0.3500 0.4713
vn 0.5600 -0.2361 0.7942
vn 0.2775 -0.1145 0.9539
vn 0.3653 -0.1573 0.9175
vn 0.4736 -0.2098 0.8554
vn 0.3064 -0.1338 0.9424
vn 0.1106 -0.0567 0.9922
vn 0.1924 -0.0822 0.9779
vn 0.9037 -0.4024 0.1465
vn 0.9179 -0.3963 0.0184
vn 0.8840 -0.3951 0.2497
vn 0.7176 -0.3287 0.6140
vn 0.8769 -0.3864 0.2861
vn 0.8837 -0.3459 0.3153
vn 0.5834 -0.2455 0.7742
vn 0.8213 -0.3702 0.4340
vn 0.7391 -0.3369 0.5833
vn 0.5051 -0.2227 0.8338
vn 0.2194 -0.0915 0.9713
vn 0.3067 -0.1338 0.9423
vn 0.3351 -0.1420 0.9314
vn 0.2487 -0.1042 0.9630
vn 0.0664 -0.0340 0.9972
vn 0.1345 -0.0626 0.9889
vn 0.1108 -0.0567 0.9922
vn 0.0493 -0.0255 0.9985
vn 0.0025 -0.0025 1.0000
vn 0.0123 -0.0074 0.9999
vn 0.0193 -0.0095 0.9998
vn 0.0057 -0.0041 1.0000
vn 0.0000 0.0000 1.0000
vn 0.1605 -0.0735 0.9843
vn 0.0844 -0.0436 0.9955
vn 0.0090 -0.0057 0.9999
vn 0.0277 -0.0147 0.9995
vn 0.0361 -0.0198 0.9992
vn 0.0122 -0.0073 0.9999
vn 0.0016 -0.0016 1.0000
vn 0.0008 -0.0008 1.0000
vn -0.0008 0.0008 1.0000
vn -0.0008 0.0024 1.0000
vn 0.9020 -0.4074 0.1428
vn 0.6666 -0.2786 0.6914
vn 0.8442 -0.3495 0.4063
vn 0.8294 -0.3744 0.4146
vn 0.6083 -0.2519 0.7526
vn 0.5048 -0.2226 0.8340
vn 0.7389 -0.3369 0.5836
vn 0.3348 -0.1419 0.9315
vn 0.9142 -0.3822 0.1349
vn 0.9015 -0.4121 0.1319
vn 0.5358 -0.2342 0.8112
vn 0.3649 -0.1571 0.9177
vn 0.1601 -0.0733 0.9844
vn 0.2484 -0.1041 0.9631
vn 0.2192 -0.0914 0.9714
vn 0.1342 -0.0625 0.9890
vn 0.0192 -0.0095 0.9998
vn 0.0491 -0.0254 0.9985
vn 0.0662 -0.0340 0.9972
vn 0.0276 -0.0146 0.9995
vn 0.7565 -0.3420 0.5574
vn 0.2772 -0.1143 0.9540
vn 0.1922 -0.0821 0.9779
vn 0.0360 -0.0198 0.9992
vn 0.0842 -0.0435 0.9955
vn 0.1104 -0.0566 0.9923
vn 0.0489 -0.0253 0.9985
vn 0.0024 -0.0024 1.0000
vn -0.0056 0.0040 1.0000
vn -0.0122 0.0073 0.9999
vn -0.0024 0.0024 1.0000
vn -0.0057 0.0041 1.0000
vn -0.0192 0.0094 0.9998
vn -0.0199 0.0290 0.9994
vn -0.0057 0.0122 0.9999
vn -0.0490 0.0253 0.9985
vn -0.1103 0.0566 0.9923
vn -0.1076 0.1384 0.9845
vn -0.0493 0.0652 0.9967
vn -0.0016 0.0016 1.0000
vn -0.0089 0.0057 0.9999
vn -0.0838 0.0433 0.9955
vn -0.0359 0.0197 0.9992
vn -0.0274 0.0145 0.9995
vn -0.0657 0.0337 0.9973
vn -0.2475 0.1036 0.9633
vn -0.1595 0.0730 0.9845
vn -0.5595 0.2353 0.7947
vn -0.4706 0.5450 0.6939
vn -0.2556 0.5379 0.8033
vn -0.2610 0.2845 0.9225
vn -0.1920 0.0819 0.9780
vn -0.2768 0.1137 0.9542
vn -0.6925 0.2838 0.6632
vn -0.8529 0.3473 0.3899
vn -0.8402 0.3563 0.4088
vn -0.6490 0.2536 0.7173
vn -0.7563 0.3416 0.5580
vn -0.5351 0.2337 0.8118
vn -0.3643 0.1565 0.9181
vn -0.9186 0.3739 0.1280
vn -0.9193 0.3931 0.0190
vn -0.5642 0.8240 0.0525
vn -0.6106 0.7100 0.3507
vn -0.4072 0.6984 0.5886
vn -0.0051 -0.0037 1.0000
vn -0.0007 -0.0007 1.0000
vn -0.0267 -0.0137 0.9996
vn -0.0635 -0.0321 0.9975
vn -0.0016 -0.0016 1.0000
vn -0.0087 -0.0056 0.9999
vn -0.2445 -0.1006 0.9644
vn -0.1578 -0.0711 0.9849
vn -0.3631 -0.1533 0.9191
vn -0.5333 -0.2296 0.8142
vn -0.0833 -0.0425 0.9956
vn -0.0362 -0.0194 0.9992
vn -0.1937 -0.0807 0.9777
vn -0.2770 -0.1116 0.9544
vn 0.0008 0.0024 1.0000
vn 0.0008 0.0008 1.0000
vn -0.0127 -0.0073 0.9999
vn -0.0028 -0.0026 1.0000
vn -0.0514 -0.0261 0.9983
vn -0.1129 -0.0563 0.9920
vn -0.0001 -0.0001 1.0000
vn -0.0064 -0.0044 1.0000
vn -0.0207 -0.0101 0.9997
vn -0.6501 -0.2491 0.7179
vn -0.8423 -0.3511 0.4089
vn -0.8545 -0.3421 0.3908
vn -0.6930 -0.2793 0.6646
vn -0.9065 -0.3959 0.1469
vn -0.9209 -0.3894 0.0186
vn -0.9219 -0.3869 0.0189
vn -0.9206 -0.3687 0.1290
vn -0.9207 -0.3873 0.0481
vn -0.9216 -0.3877 0.0176
vn -0.4763 -0.2070 0.8546
vn -0.7205 -0.3242 0.6129
vn -0.8121 -0.3441 0.4713
vn -0.5616 -0.2317 0.7943
vn -0.6504 -0.2616 0.7132
vn -0.8397 -0.3370 0.4258
vn -0.8864 -0.3394 0.3148
vn -0.9144 -0.3785 0.1433
vn -0.9217 -0.3875 0.0189
vn -0.9226 -0.3853 0.0184
vn -0.9208 -0.3656 0.1357
vn -0.8866 -0.3891 0.2502
vn -0.5113 -0.2216 0.8304
vn -0.7441 -0.3334 0.5790
vn -0.8248 -0.3652 0.4317
vn -0.5878 -0.2424 0.7719
vn -0.3100 -0.1326 0.9415
vn -0.2239 -0.0917 0.9703
vn -0.1394 -0.0634 0.9882
vn -0.0706 -0.0357 0.9969
vn -0.2590 -0.1051 0.9601
vn -0.3427 -0.1415 0.9287
vn -0.9175 -0.3750 0.1330
vn -0.9100 -0.3938 0.1293
vn -0.5490 -0.2326 0.8028
vn -0.7643 -0.3370 0.5499
vn -0.8346 -0.3691 0.4089
vn -0.6174 -0.2484 0.7464
vn -0.7021 -0.2819 0.6538
vn -0.8575 -0.3415 0.3847
vn -0.8879 -0.3800 0.2593
vn -0.9222 -0.3658 0.1252
vn -0.9215 -0.3879 0.0179
vn -0.9129 -0.3923 0.1124
vn -0.9043 -0.4070 0.1290
vn -0.6730 -0.2764 0.6861
vn -0.8481 -0.3445 0.4024
vn -0.8805 -0.3802 0.2831
vn -0.9048 -0.4016 0.1416
vn -0.7565 -0.3368 0.5605
vn 0.0057 0.0122 0.9999
vn 0.0186 0.0303 0.9994
vn 0.0199 0.0114 0.9997
vn 0.0057 0.0041 1.0000
vn 0.0441 0.0679 0.9967
vn 0.0969 0.1422 0.9851
vn 0.1159 0.0612 0.9914
vn 0.0516 0.0292 0.9982
vn 0.0007 0.0007 1.0000
vn -0.0010 -0.0010 1.0000
vn 0.0051 0.0037 1.0000
vn 0.0176 0.0088 0.9998
vn 0.2483 0.2990 0.9214
vn 0.2347 0.5472 0.8034
vn 0.4618 0.5558 0.6913
vn 0.5515 0.2558 0.7940
vn 0.2967 0.1338 0.9456
vn 0.2031 0.0927 0.9748
vn 0.4598 0.1970 0.8659
vn 0.7116 0.3065 0.6322
vn 0.7679 0.3313 0.5482
vn 0.5440 0.2244 0.8085
vn 0.8105 0.3629 0.4597
vn 0.6340 0.2640 0.7269
vn 0.8760 0.3588 0.3224
vn 0.5989 0.7172 0.3564
vn 0.5435 0.8377 0.0542
vn 0.9105 0.4129 0.0208
vn 0.9145 0.3853 0.1237
vn 0.0457 0.0238 0.9987
vn 0.1057 0.0554 0.9929
vn 0.0114 0.0069 0.9999
vn 0.0022 0.0022 1.0000
vn 0.1867 0.0797 0.9792
vn 0.2699 0.1070 0.9569
vn 0.0785 0.0400 0.9961
vn 0.0338 0.0183 0.9993
vn 0.3735 0.7083 0.5990
vn -0.0302 -0.0159 0.9994
vn -0.0101 -0.0063 0.9999
vn -0.0923 -0.0471 0.9946
vn -0.1712 -0.0761 0.9823
vn -0.0019 -0.0019 1.0000
vn -0.0153 -0.0079 0.9999
vn -0.0407 -0.0214 0.9989
vn -0.5730 -0.2378 0.7843
vn -0.8157 -0.3499 0.4607
vn -0.8473 -0.3500 0.3995
vn -0.6585 -0.2563 0.7076
vn -0.3794 -0.1614 0.9110
vn -0.2892 -0.1210 0.9496
vn -0.2040 -0.0836 0.9754
vn -0.1226 -0.0578 0.9908
vn -0.3218 -0.1354 0.9371
vn -0.4903 -0.2115 0.8455
vn -0.7306 -0.3273 0.5992
vn -0.8896 -0.3914 0.2353
vn -0.9068 -0.3972 0.1414
vn -0.0004 -0.0004 1.0000
vn -0.0041 -0.0033 1.0000
vn 0.0014 0.0014 1.0000
vn 0.0080 0.0052 1.0000
vn -0.0586 -0.0297 0.9978
vn -0.0243 -0.0122 0.9996
vn -0.1492 -0.0676 0.9865
vn -0.2350 -0.0974 0.9671
vn -0.0078 -0.0051 1.0000
vn -0.0013 -0.0013 1.0000
vn -0.0337 -0.0180 0.9993
vn -0.0777 -0.0393 0.9962
vn -0.9196 -0.3926 0.0143
vn -0.9216 -0.3666 0.1275
vn -0.9240 -0.3820 0.0142
vn -0.9218 -0.3875 0.0110
vn -0.9211 -0.3873 0.0382
vn -0.5985 -0.2453 0.7627
vn -0.8282 -0.3671 0.4234
vn -0.8429 -0.3399 0.4170
vn -0.6593 -0.2670 0.7029
vn -0.9046 -0.4036 0.1372
vn -0.9221 -0.3866 0.0179
vn -0.9159 -0.3765 0.1394
vn -0.9110 -0.3936 0.1233
vn -0.8830 -0.3805 0.2748
vn -0.8872 -0.3451 0.3061
vn -0.6382 -0.2514 0.7276
vn -0.8426 -0.3634 0.3975
vn -0.8526 -0.3435 0.3939
vn -0.6857 -0.2791 0.6723
vn -0.5235 -0.2278 0.8210
vn -0.7517 -0.3371 0.5668
vn -0.3527 -0.1477 0.9240
vn -0.9048 -0.4063 0.1272
vn -0.9218 -0.3872 0.0187
vn -0.9193 -0.3717 0.1294
vn -0.4610 -0.1947 0.8658
vn -0.7131 -0.3023 0.6325
vn -0.7686 -0.3269 0.5500
vn -0.5438 -0.2212 0.8095
vn -0.2694 -0.1052 0.9573
vn -0.1872 -0.0788 0.9792
vn -0.9142 -0.3782 0.1456
vn -0.9244 -0.3629 0.1174
vn -0.9122 -0.3964 0.1038
vn -0.6438 -0.2576 0.7205
vn -0.8392 -0.3335 0.4297
vn -0.8837 -0.3460 0.3153
vn -0.8861 -0.3895 0.2512
vn 0.9190 -0.3938 -0.0189
vn 0.9184 -0.3744 -0.1278
vn 0.9036 -0.4024 -0.1467
vn 0.9180 -0.3962 -0.0185
vn 0.9187 -0.3945 -0.0175
vn 0.9178 -0.3941 -0.0479
vn 0.8528 -0.3478 -0.3897
vn 0.6927 -0.2843 -0.6628
vn 0.6491 -0.2543 -0.7169
vn 0.8401 -0.3568 -0.4086
vn 0.9189 -0.3940 -0.0187
vn 0.9092 -0.3995 -0.1167
vn 0.8831 -0.3867 -0.2657
vn 0.9069 -0.4003 -0.1315
vn 0.9141 -0.3823 -0.1350
vn 0.9197 -0.3921 -0.0184
vn 0.9181 -0.3723 -0.1361
vn 0.9116 -0.3850 -0.1441
vn 0.9188 -0.3942 -0.0189
vn 0.8095 -0.3498 -0.4716
vn 0.5597 -0.2359 -0.7944
vn 0.4732 -0.2097 -0.8556
vn 0.7173 -0.3286 -0.6143
vn 0.8368 -0.3423 -0.4273
vn 0.6466 -0.2650 -0.7153
vn 0.8837 -0.3458 -0.3155
vn 0.8211 -0.3701 -0.4344
vn 0.5828 -0.2453 -0.7747
vn 0.5045 -0.2224 -0.8343
vn 0.7387 -0.3368 -0.5839
vn 0.3061 -0.1337 -0.9426
vn 0.2189 -0.0913 -0.9715
vn 0.9020 -0.4073 -0.1430
vn 0.8442 -0.3495 -0.4065
vn 0.6664 -0.2784 -0.6916
vn 0.8768 -0.3863 -0.2863
vn 0.8839 -0.3951 -0.2501
vn 0.4349 -0.9001 -0.0257
vn 0.1170 -0.9929 -0.0220
vn 0.1280 -0.9795 -0.1553
vn 0.4263 -0.8920 -0.1502
vn 0.4854 -0.7654 -0.4226
vn 0.1232 -0.9142 -0.3861
vn 0.1176 -0.6603 -0.7418
vn 0.3530 -0.6086 -0.7106
vn 0.7926 -0.6093 -0.0227
vn 0.7865 -0.6045 -0.1267
vn 0.7719 -0.5650 -0.2914
vn 0.9185 -0.3742 -0.1276
vn 0.9037 -0.4024 -0.1465
vn 0.9179 -0.3964 -0.0183
vn 0.9187 -0.3945 -0.0172
vn 0.9178 -0.3942 -0.0475
vn 0.8317 -0.3799 -0.4050
vn 0.6867 -0.2889 -0.6671
vn 0.6473 -0.2576 -0.7173
vn 0.8404 -0.3567 -0.4081
vn 0.9198 -0.3919 -0.0182
vn 0.9181 -0.3724 -0.1357
vn 0.9117 -0.3849 -0.1439
vn 0.8096 -0.3501 -0.4711
vn 0.5602 -0.2362 -0.7939
vn 0.4739 -0.2099 -0.8552
vn 0.7179 -0.3288 -0.6137
vn 0.8370 -0.3424 -0.4269
vn 0.6471 -0.2653 -0.7148
vn 0.8837 -0.3461 -0.3152
vn 0.1330 -0.3032 -0.9436
vn 0.1291 -0.1374 -0.9821
vn 0.3479 -0.1806 -0.9200
vn 0.4682 -0.3316 -0.8191
vn 0.0811 -0.0497 -0.9955
vn 0.0362 -0.0199 -0.9991
vn 0.1926 -0.0822 -0.9778
vn 0.2765 -0.1161 -0.9540
vn 0.6836 -0.4501 -0.5746
vn 0.8841 -0.3952 -0.2494
vn 0.0000 -0.9998 -0.0186
vn -0.2716 -0.9623 -0.0172
vn -0.2634 -0.9488 -0.1742
vn -0.0208 -0.9857 -0.1672
vn -0.0492 -0.9084 -0.4152
vn -0.3299 -0.8143 -0.4776
vn -0.1929 -0.6331 -0.7496
vn -0.0674 -0.6617 -0.7468
vn -0.7391 -0.6734 -0.0157
vn -0.7237 -0.6733 -0.1512
vn -0.6973 -0.6363 -0.3300
vn -0.3417 -0.3529 -0.8710
vn -0.2711 -0.1657 -0.9482
vn -0.0635 -0.1341 -0.9889
vn -0.0773 -0.3217 -0.9437
vn -0.2108 -0.0880 -0.9736
vn -0.1294 -0.0600 -0.9898
vn -0.0158 -0.0103 -0.9998
vn -0.0346 -0.0328 -0.9989
vn -0.9218 -0.3872 -0.0187
vn -0.9049 -0.3998 -0.1458
vn -0.9041 -0.4028 -0.1428
vn -0.9096 -0.4151 -0.0172
vn -0.9093 -0.3937 -0.1348
vn -0.8214 -0.3634 -0.4396
vn -0.5703 -0.2458 -0.7838
vn -0.6221 -0.2645 -0.7369
vn -0.8060 -0.3916 -0.4438
vn -0.9045 -0.4050 -0.1339
vn -0.9161 -0.3768 -0.1373
vn -0.8305 -0.3682 -0.4180
vn -0.6057 -0.2467 -0.7565
vn -0.6646 -0.2710 -0.6963
vn -0.8450 -0.3425 -0.4106
vn -0.7362 -0.3297 -0.5910
vn -0.4988 -0.2155 -0.8395
vn -0.3301 -0.1378 -0.9338
vn -0.5584 -0.5099 -0.6543
vn -0.8783 -0.3796 -0.2907
vn -0.9218 -0.3872 -0.0186
vn -0.9117 -0.3933 -0.1189
vn -0.8849 -0.3804 -0.2687
vn 0.9069 -0.4003 -0.1312
vn 0.9142 -0.3822 -0.1348
vn 0.9093 -0.3995 -0.1166
vn 0.9185 -0.3743 -0.1277
vn 0.9015 -0.4122 -0.1318
vn 0.8295 -0.3744 -0.4145
vn 0.6086 -0.2519 -0.7525
vn 0.5361 -0.2343 -0.8110
vn 0.7567 -0.3420 -0.5572
vn 0.8529 -0.3477 -0.3895
vn 0.6929 -0.2843 -0.6626
vn 0.8832 -0.3867 -0.2655
vn 0.8443 -0.3496 -0.4061
vn 0.6668 -0.2787 -0.6912
vn 0.8769 -0.3864 -0.2859
vn 0.9187 -0.3945 -0.0174
vn 0.9178 -0.3942 -0.0477
vn 0.9181 -0.3723 -0.1359
vn 0.9198 -0.3920 -0.0183
vn 0.9116 -0.3850 -0.1440
vn 0.9020 -0.4073 -0.1429
vn 0.9069 -0.4003 -0.1314
vn 0.8369 -0.3423 -0.4271
vn 0.6469 -0.2652 -0.7150
vn 0.5831 -0.2454 -0.7745
vn 0.8212 -0.3702 -0.4343
vn 0.8402 -0.3567 -0.4083
vn 0.6493 -0.2545 -0.7167
vn 0.5600 -0.2361 -0.7942
vn 0.8095 -0.3500 -0.4713
vn 0.3653 -0.1573 -0.9175
vn 0.2774 -0.1145 -0.9539
vn 0.1924 -0.0821 -0.9779
vn 0.1106 -0.0567 -0.9922
vn 0.3064 -0.1337 -0.9425
vn 0.4735 -0.2098 -0.8554
vn 0.9179 -0.3963 -0.0184
vn 0.9037 -0.4024 -0.1466
vn 0.8840 -0.3951 -0.2497
vn 0.7176 -0.3287 -0.6140
vn 0.8769 -0.3863 -0.2861
vn 0.8837 -0.3459 -0.3153
vn 0.8213 -0.3702 -0.4341
vn 0.5833 -0.2454 -0.7743
vn 0.5051 -0.2227 -0.8338
vn 0.7390 -0.3370 -0.5833
vn 0.3067 -0.1338 -0.9424
vn 0.2194 -0.0915 -0.9713
vn 0.1345 -0.0626 -0.9889
vn 0.0664 -0.0341 -0.9972
vn 0.2487 -0.1042 -0.9630
vn 0.3351 -0.1420 -0.9314
vn 0.0123 -0.0074 -0.9999
vn 0.0025 -0.0025 -1.0000
vn 0.0493 -0.0255 -0.9985
vn 0.1108 -0.0567 -0.9922
vn 0.0000 -0.0000 -1.0000
vn 0.0057 -0.0041 -1.0000
vn 0.0193 -0.0095 -0.9998
vn 0.0277 -0.0147 -0.9995
vn 0.0090 -0.0057 -0.9999
vn 0.0844 -0.0436 -0.9955
vn 0.1604 -0.0735 -0.9843
vn 0.0016 -0.0016 -1.0000
vn 0.0122 -0.0073 -0.9999
vn 0.0361 -0.0198 -0.9992
vn 0.0008 -0.0008 -1.0000
vn -0.0008 0.0024 -1.0000
vn -0.0008 0.0008 -1.0000
vn 0.9020 -0.4074 -0.1428
vn 0.9142 -0.3822 -0.1349
vn 0.9015 -0.4121 -0.1319
vn 0.8442 -0.3495 -0.4063
vn 0.6666 -0.2786 -0.6914
vn 0.6083 -0.2519 -0.7527
vn 0.8294 -0.3744 -0.4147
vn 0.7389 -0.3369 -0.5836
vn 0.5048 -0.2226 -0.8341
vn 0.3348 -0.1419 -0.9316
vn 0.2483 -0.1040 -0.9631
vn 0.1601 -0.0733 -0.9844
vn 0.3649 -0.1571 -0.9177
vn 0.5358 -0.2342 -0.8112
vn 0.0491 -0.0254 -0.9985
vn 0.0192 -0.0095 -0.9998
vn 0.1342 -0.0625 -0.9890
vn 0.2191 -0.0914 -0.9714
vn 0.0276 -0.0146 -0.9995
vn 0.0662 -0.0340 -0.9972
vn 0.7565 -0.3420 -0.5574
vn 0.0842 -0.0435 -0.9955
vn 0.0360 -0.0198 -0.9992
vn 0.1922 -0.0821 -0.9779
vn 0.2772 -0.1143 -0.9540
vn 0.0024 -0.0024 -1.0000
vn 0.0489 -0.0253 -0.9985
vn 0.1104 -0.0566 -0.9923
vn -0.0056 0.0040 -1.0000
vn -0.0024 0.0024 -1.0000
vn -0.0122 0.0073 -0.9999
vn -0.0057 0.0122 -0.9999
vn -0.0199 0.0290 -0.9994
vn -0.0192 0.0094 -0.9998
vn -0.0057 0.0041 -1.0000
vn -0.0493 0.0652 -0.9967
vn -0.1076 0.1383 -0.9845
vn -0.1103 0.0565 -0.9923
vn -0.0490 0.0253 -0.9985
vn -0.0359 0.0197 -0.9992
vn -0.0838 0.0433 -0.9955
vn -0.0089 0.0057 -0.9999
vn -0.0016 0.0016 -1.0000
vn -0.1595 0.0730 -0.9845
vn -0.2475 0.1036 -0.9633
vn -0.0657 0.0337 -0.9973
vn -0.0274 0.0145 -0.9995
vn -0.4706 0.5450 -0.6939
vn -0.5595 0.2353 -0.7948
vn -0.2610 0.2844 -0.9225
vn -0.2556 0.5379 -0.8033
vn -0.2768 0.1137 -0.9542
vn -0.1920 0.0819 -0.9780
vn -0.9193 0.3931 -0.0190
vn -0.9186 0.3739 -0.1280
vn -0.6106 0.7100 -0.3507
vn -0.5642 0.8240 -0.0525
vn -0.8528 0.3473 -0.3899
vn -0.6925 0.2838 -0.6633
vn -0.6490 0.2536 -0.7173
vn -0.8402 0.3563 -0.4089
vn -0.5351 0.2337 -0.8118
vn -0.7563 0.3416 -0.5580
vn -0.3642 0.1564 -0.9181
vn -0.4072 0.6984 -0.5886
vn -0.0634 -0.0321 -0.9975
vn -0.0267 -0.0137 -0.9996
vn -0.0007 -0.0007 -1.0000
vn -0.0051 -0.0037 -1.0000
vn -0.0087 -0.0056 -0.9999
vn -0.0016 -0.0016 -1.0000
vn -0.5333 -0.2296 -0.8142
vn -0.3631 -0.1532 -0.9191
vn -0.1578 -0.0711 -0.9849
vn -0.2445 -0.1006 -0.9644
vn -0.2770 -0.1116 -0.9544
vn -0.1937 -0.0807 -0.9777
vn -0.0362 -0.0194 -0.9992
vn -0.0833 -0.0425 -0.9956
vn 0.0008 0.0008 -1.0000
vn 0.0008 0.0024 -1.0000
vn -0.1129 -0.0563 -0.9920
vn -0.0514 -0.0261 -0.9983
vn -0.0028 -0.0026 -1.0000
vn -0.0127 -0.0073 -0.9999
vn -0.0207 -0.0101 -0.9997
vn -0.0064 -0.0044 -1.0000
vn -0.0001 -0.0001 -1.0000
vn -0.9209 -0.3894 -0.0186
vn -0.9065 -0.3959 -0.1470
vn -0.9206 -0.3687 -0.1290
vn -0.9219 -0.3869 -0.0190
vn -0.9216 -0.3877 -0.0177
vn -0.9207 -0.3874 -0.0481
vn -0.8423 -0.3511 -0.4089
vn -0.6500 -0.2491 -0.7179
vn -0.6930 -0.2793 -0.6646
vn -0.8545 -0.3421 -0.3909
vn -0.9217 -0.3875 -0.0190
vn -0.9144 -0.3785 -0.1434
vn -0.9208 -0.3656 -0.1357
vn -0.9226 -0.3853 -0.0185
vn -0.7205 -0.3242 -0.6130
vn -0.4763 -0.2069 -0.8546
vn -0.5616 -0.2317 -0.7943
vn -0.8120 -0.3441 -0.4714
vn -0.8397 -0.3369 -0.4258
vn -0.6503 -0.2616 -0.7132
vn -0.8864 -0.3394 -0.3148
vn -0.8866 -0.3891 -0.2502
vn -0.7441 -0.3334 -0.5790
vn -0.5113 -0.2215 -0.8304
vn -0.5877 -0.2423 -0.7719
vn -0.8247 -0.3652 -0.4318
vn -0.2238 -0.0917 -0.9703
vn -0.3099 -0.1326 -0.9415
vn -0.3427 -0.1415 -0.9287
vn -0.2590 -0.1051 -0.9601
vn -0.0706 -0.0357 -0.9969
vn -0.1394 -0.0634 -0.9882
vn -0.9175 -0.3750 -0.1330
vn -0.9100 -0.3938 -0.1293
vn -0.9215 -0.3879 -0.0179
vn -0.9222 -0.3658 -0.1253
vn -0.9129 -0.3923 -0.1125
vn -0.9043 -0.4070 -0.1291
vn -0.7643 -0.3370 -0.5499
vn -0.5490 -0.2326 -0.8028
vn -0.6174 -0.2484 -0.7464
vn -0.8346 -0.3691 -0.4090
vn -0.8575 -0.3415 -0.3848
vn -0.7021 -0.2819 -0.6539
vn -0.8879 -0.3800 -0.2594
vn -0.9048 -0.4016 -0.1417
vn -0.8481 -0.3445 -0.4025
vn -0.6729 -0.2764 -0.6861
vn -0.8805 -0.3802 -0.2831
vn -0.7565 -0.3368 -0.5606
vn 0.0057 0.0041 -1.0000
vn 0.0199 0.0114 -0.9997
vn 0.0186 0.0303 -0.9994
vn 0.0057 0.0122 -0.9999
vn 0.0516 0.0292 -0.9982
vn 0.1159 0.0612 -0.9914
vn 0.0969 0.1422 -0.9851
vn 0.0440 0.0679 -0.9967
vn -0.0010 -0.0010 -1.0000
vn 0.0007 0.0007 -1.0000
vn 0.0176 0.0088 -0.9998
vn 0.0051 0.0037 -1.0000
vn 0.2347 0.5471 -0.8035
vn 0.2483 0.2990 -0.9214
vn 0.5515 0.2558 -0.7940
vn 0.4617 0.5557 -0.6913
vn 0.2031 0.0926 -0.9748
vn 0.2966 0.1337 -0.9456
vn 0.5435 0.8377 -0.0542
vn 0.5989 0.7172 -0.3564
vn 0.9145 0.3853 -0.1238
vn 0.9105 0.4129 -0.0209
vn 0.7116 0.3065 -0.6322
vn 0.4598 0.1970 -0.8659
vn 0.5439 0.2244 -0.8086
vn 0.7679 0.3313 -0.5482
vn 0.6339 0.2640 -0.7270
vn 0.8105 0.3629 -0.4597
vn 0.8759 0.3588 -0.3225
vn 0.0022 0.0022 -1.0000
vn 0.0114 0.0069 -0.9999
vn 0.1057 0.0554 -0.9929
vn 0.0457 0.0238 -0.9987
vn 0.0338 0.0183 -0.9993
vn 0.0785 0.0401 -0.9961
vn 0.2699 0.1070 -0.9569
vn 0.1867 0.0797 -0.9792
vn 0.3735 0.7083 -0.5990
vn -0.1712 -0.0761 -0.9823
vn -0.0923 -0.0471 -0.9946
vn -0.0101 -0.0063 -0.9999
vn -0.0302 -0.0159 -0.9994
vn -0.0407 -0.0214 -0.9989
vn -0.0153 -0.0079 -0.9999
vn -0.0019 -0.0019 -1.0000
vn -0.8157 -0.3499 -0.4607
vn -0.5730 -0.2378 -0.7843
vn -0.6585 -0.2563 -0.7076
vn -0.8472 -0.3500 -0.3996
vn -0.2892 -0.1210 -0.9496
vn -0.3794 -0.1614 -0.9111
vn -0.4902 -0.2115 -0.8455
vn -0.3217 -0.1354 -0.9371
vn -0.1226 -0.0578 -0.9908
vn -0.2040 -0.0835 -0.9754
vn -0.7306 -0.3273 -0.5992
vn -0.8896 -0.3914 -0.2353
vn -0.9068 -0.3972 -0.1414
vn -0.0041 -0.0033 -1.0000
vn -0.0004 -0.0004 -1.0000
vn 0.0080 0.0052 -1.0000
vn 0.0014 0.0014 -1.0000
vn -0.2350 -0.0974 -0.9671
vn -0.1492 -0.0676 -0.9865
vn -0.0243 -0.0122 -0.9996
vn -0.0586 -0.0297 -0.9978
vn -0.0777 -0.0393 -0.9962
vn -0.0337 -0.0180 -0.9993
vn -0.0014 -0.0013 -1.0000
vn -0.0078 -0.0051 -1.0000
vn -0.9196 -0.3926 -0.0143
vn -0.9240 -0.3820 -0.0142
vn -0.9216 -0.3666 -0.1275
vn -0.9211 -0.3873 -0.0383
vn -0.9218 -0.3875 -0.0110
vn -0.9046 -0.4035 -0.1372
vn -0.9159 -0.3765 -0.1394
vn -0.9221 -0.3866 -0.0179
vn -0.9110 -0.3936 -0.1233
vn -0.8282 -0.3671 -0.4235
vn -0.5984 -0.2453 -0.7627
vn -0.6593 -0.2670 -0.7029
vn -0.8429 -0.3399 -0.4170
vn -0.8830 -0.3804 -0.2748
vn -0.8872 -0.3451 -0.3062
vn -0.9048 -0.4063 -0.1273
vn -0.9193 -0.3717 -0.1295
vn -0.8426 -0.3634 -0.3976
vn -0.6382 -0.2514 -0.7277
vn -0.6856 -0.2791 -0.6723
vn -0.8525 -0.3435 -0.3940
vn -0.7517 -0.3371 -0.5668
vn -0.5234 -0.2278 -0.8211
vn -0.3526 -0.1477 -0.9240
vn -0.7131 -0.3023 -0.6325
vn -0.4610 -0.1947 -0.8658
vn -0.5438 -0.2212 -0.8096
vn -0.7686 -0.3269 -0.5500
vn -0.1872 -0.0788 -0.9792
vn -0.2693 -0.1052 -0.9573
vn -0.9142 -0.3782 -0.1457
vn -0.9244 -0.3629 -0.1175
vn -0.9122 -0.3964 -0.1038
vn -0.8391 -0.3335 -0.4297
vn -0.6438 -0.2576 -0.7205
vn -0.8837 -0.3460 -0.3154
vn -0.8861 -0.3895 -0.2513
vn 0.9069 -0.4003 0.1317
vn 0.9141 -0.3824 0.1351
vn 0.6075 -0.2518 0.7533
vn 0.8291 -0.3743 0.4152
vn 0.7560 -0.3421 0.5581
vn 0.5347 -0.2341 0.8120
vn 0.6921 -0.2842 0.6635
vn 0.8526 -0.3479 0.3900
vn 0.8829 -0.3868 0.2663
vn 0.9092 -0.3996 0.1171
vn 0.9190 -0.3937 0.0190
vn 0.9183 -0.3746 0.1280
vn 0.9015 -0.4120 0.1322
vn 0.6661 -0.2782 0.6921
vn 0.8440 -0.3494 0.4069
vn 0.8767 -0.3863 0.2866
vn 0.9178 -0.3941 0.0481
vn 0.9187 -0.3945 0.0176
vn 0.9197 -0.3922 0.0184
vn 0.9181 -0.3723 0.1362
vn 0.6464 -0.2649 0.7155
vn 0.8367 -0.3422 0.4275
vn 0.8211 -0.3701 0.4346
vn 0.5825 -0.2452 0.7749
vn 0.9116 -0.3851 0.1441
vn 0.9188 -0.3943 0.0189
vn 0.9021 -0.4072 0.1430
vn 0.9069 -0.4004 0.1316
vn 0.6662 -0.2783 0.6918
vn 0.8441 -0.3494 0.4067
vn 0.8292 -0.3743 0.4150
vn 0.6078 -0.2518 0.7531
vn 0.5042 -0.2223 0.8345
vn 0.7385 -0.3367 0.5842
vn 0.3342 -0.1417 0.9318
vn 0.9015 -0.4120 0.1321
vn 0.9092 -0.3996 0.1170
vn 0.8768 -0.3863 0.2864
vn 0.8830 -0.3867 0.2661
vn 0.6081 -0.2519 0.7529
vn 0.8293 -0.3744 0.4148
vn 0.7563 -0.3420 0.5577
vn 0.5354 -0.2342 0.8115
vn 0.6925 -0.2843 0.6630
vn 0.8527 -0.3478 0.3898
vn 0.8830 -0.3868 0.2659
vn 0.9092 -0.3996 0.1168
vn 0.9190 -0.3937 0.0189
vn 0.9184 -0.3744 0.1278
vn 0.9015 -0.4121 0.1320
vn 0.6490 -0.2542 0.7171
vn 0.8400 -0.3568 0.4088
vn 0.8094 -0.3497 0.4718
vn 0.5594 -0.2358 0.7947
vn 0.2769 -0.1140 0.9541
vn 0.3646 -0.1569 0.9179
vn 0.3345 -0.1418 0.9317
vn 0.2480 -0.1039 0.9632
vn 0.0660 -0.0339 0.9972
vn 0.1340 -0.0624 0.9890
vn 0.1598 -0.0732 0.9844
vn 0.0839 -0.0434 0.9955
vn 0.0089 -0.0057 0.9999
vn 0.0275 -0.0146 0.9995
vn 0.9180 -0.3961 0.0185
vn 0.9036 -0.4023 0.1468
vn 0.8839 -0.3950 0.2504
vn 0.4729 -0.2096 0.8558
vn 0.3058 -0.1336 0.9427
vn 0.1102 -0.0566 0.9923
vn 0.1920 -0.0820 0.9780
vn 0.2186 -0.0912 0.9715
vn 0.1337 -0.0624 0.9891
vn 0.0191 -0.0094 0.9998
vn 0.0488 -0.0253 0.9985
vn 0.0359 -0.0197 0.9992
vn 0.8837 -0.3456 0.3157
vn 0.7171 -0.3286 0.6147
vn 0.6923 -0.2842 0.6633
vn 0.8526 -0.3478 0.3899
vn 0.8399 -0.3569 0.4090
vn 0.6488 -0.2540 0.7174
vn 0.9184 -0.3745 0.1279
vn 0.9180 -0.3961 0.0186
vn 0.9036 -0.4023 0.1469
vn 0.9178 -0.3941 0.0483
vn 0.9187 -0.3945 0.0178
vn 0.5591 -0.2356 0.7949
vn 0.8093 -0.3495 0.4721
vn 0.7168 -0.3285 0.6150
vn 0.4725 -0.2095 0.8561
vn 0.6462 -0.2647 0.7158
vn 0.8367 -0.3421 0.4277
vn 0.8837 -0.3455 0.3159
vn 0.9181 -0.3722 0.1364
vn 0.9197 -0.3922 0.0185
vn 0.9115 -0.3851 0.1442
vn 0.5351 -0.2341 0.8117
vn 0.3642 -0.1567 0.9181
vn 0.1595 -0.0731 0.9845
vn 0.2476 -0.1038 0.9633
vn 0.2766 -0.1138 0.9542
vn 0.1917 -0.0819 0.9780
vn 0.0358 -0.0196 0.9992
vn 0.0837 -0.0433 0.9955
vn 0.7562 -0.3420 0.5579
vn 0.8838 -0.3950 0.2508
vn 0.5822 -0.2452 0.7752
vn 0.8210 -0.3701 0.4348
vn 0.7383 -0.3366 0.5845
vn 0.5039 -0.2221 0.8347
vn 0.2183 -0.0911 0.9716
vn 0.3055 -0.1335 0.9428
vn 0.3339 -0.1417 0.9319
vn 0.2473 -0.1037 0.9634
vn 0.0657 -0.0337 0.9973
vn 0.1335 -0.0623 0.9891
vn 0.1100 -0.0565 0.9923
vn 0.0486 -0.0252 0.9985
vn 0.0121 -0.0073 0.9999
vn 0.0190 -0.0094 0.9998
vn 0.0056 -0.0040 1.0000
vn 0.0658 -0.0338 0.9973
vn 0.0275 -0.0145 0.9995
vn -0.0120 0.0072 0.9999
vn -0.0087 0.0056 0.9999
vn -0.0826 0.0426 0.9957
vn -0.0354 0.0194 0.9992
vn -0.0054 0.0039 1.0000
vn -0.0007 0.0007 1.0000
vn -0.0477 0.0248 0.9986
vn -0.0185 0.0092 0.9998
vn -0.0269 0.0142 0.9995
vn -0.0647 0.0332 0.9974
vn -0.2455 0.1030 0.9639
vn -0.1577 0.0722 0.9848
vn -0.1321 0.0617 0.9893
vn -0.2165 0.0902 0.9721
vn -0.5021 0.2209 0.8361
vn -0.3322 0.1409 0.9326
vn 0.9021 -0.4072 0.1431
vn 0.9178 -0.3941 0.0485
vn 0.9187 -0.3945 0.0179
vn 0.9196 -0.3923 0.0186
vn 0.9180 -0.3722 0.1366
vn 0.6013 -0.1892 0.7763
vn 0.8351 -0.3350 0.4363
vn 0.8288 -0.1703 0.5330
vn 0.5559 0.0449 0.8300
vn 0.9115 -0.3852 0.1443
vn 0.9188 -0.3943 0.0190
vn 0.9021 -0.4071 0.1432
vn 0.9683 -0.2285 0.1013
vn 0.9789 -0.2037 0.0148
vn 0.6486 -0.2538 0.7176
vn 0.8397 -0.3569 0.4092
vn 0.8091 -0.3490 0.4728
vn 0.5563 -0.2294 0.7987
vn 0.2713 -0.0977 0.9575
vn 0.3638 -0.1565 0.9183
vn 0.4407 -0.1083 0.8911
vn 0.1846 0.2235 0.9571
vn 0.0725 0.3600 0.9301
vn 0.1720 0.0817 0.9817
vn 0.9036 -0.4023 0.1470
vn 0.9181 -0.3960 0.0187
vn 0.8837 -0.3950 0.2512
vn 0.7155 -0.3277 0.6170
vn 0.8844 -0.1263 0.4492
vn 0.8837 -0.3453 0.3161
vn 0.8419 0.5394 0.0148
vn 0.2142 0.9766 0.0171
vn 0.1961 0.9689 0.1508
vn 0.8207 0.5599 0.1141
vn 0.0208 0.9365 0.3501
vn 0.0000 0.9377 0.3475
vn 0.0109 0.7323 0.6809
vn 0.0642 0.6867 0.7241
vn 0.0000 0.9998 0.0187
vn 0.0000 0.9890 0.1476
vn 0.0088 0.9877 0.1559
vn 0.4163 0.7189 0.5567
vn 0.3835 0.5518 0.7406
vn 0.7512 0.4802 0.4529
vn 0.1592 -0.0730 0.9846
vn 0.0812 -0.0191 0.9965
vn 0.0089 0.0208 0.9997
vn 0.0274 -0.0145 0.9995
vn 0.0287 0.1576 0.9871
vn 0.0047 0.4140 0.9103
vn 0.0000 0.4180 0.9084
vn 0.0016 0.1775 0.9841
vn 0.0000 0.0264 0.9997
vn 0.0000 0.1791 0.9838
vn 0.0000 0.7431 0.6692
vn -0.0119 0.0072 0.9999
vn -0.0303 0.0377 0.9988
vn -0.1850 0.0895 0.9786
vn -0.1085 0.0562 0.9925
vn -0.0437 0.1815 0.9824
vn -0.0334 0.4030 0.9146
vn -0.1721 0.3369 0.9257
vn -0.2220 0.1828 0.9578
vn -0.6447 0.2633 0.7177
vn -0.8373 0.3414 0.4271
vn -0.8207 0.3693 0.4360
vn -0.5805 0.2443 0.7768
vn -0.7155 0.3152 0.6235
vn -0.4646 0.2031 0.8619
vn -0.3034 0.1328 0.9436
vn -0.9119 0.3841 0.1447
vn -0.9192 0.3934 0.0186
vn -0.9024 0.4063 0.1438
vn -0.5711 0.3307 0.7513
vn -0.8290 0.4169 0.3728
vn -0.7738 0.3375 0.5359
vn -0.5328 0.2452 0.8100
vn -0.8847 0.3958 0.2462
vn -0.8819 0.3542 0.3112
vn -0.9100 0.4019 0.1017
vn -0.9222 0.3690 0.1154
vn -0.8747 0.4844 0.0182
vn -0.8634 0.4902 0.1191
vn -0.0006 0.9374 0.3483
vn -0.1143 0.9413 0.3176
vn -0.1035 0.7073 0.6993
vn -0.0112 0.7339 0.6791
vn -0.1798 0.9836 0.0170
vn -0.1630 0.9775 0.1337
vn -0.5788 0.7474 0.3262
vn -0.4509 0.6185 0.6435
vn -0.6165 0.7872 0.0170
vn -0.6117 0.7808 0.1272
vn 0.0192 -0.0094 0.9998
vn -0.0485 0.0251 0.9985
vn -0.0190 0.0094 0.9998
vn -0.0121 0.0073 0.9999
vn -0.0357 0.0195 0.9992
vn -0.1914 0.0816 0.9781
vn -0.1097 0.0564 0.9924
vn -0.0272 0.0143 0.9995
vn -0.0088 0.0056 0.9999
vn -0.0055 0.0040 1.0000
vn -0.0188 0.0093 0.9998
vn -0.1328 0.0620 0.9892
vn -0.0652 0.0334 0.9973
vn -0.0832 0.0429 0.9956
vn -0.1586 0.0726 0.9847
vn -0.3631 0.1558 0.9186
vn -0.2760 0.1130 0.9545
vn -0.6070 0.2512 0.7539
vn -0.8292 0.3737 0.4157
vn -0.7558 0.3417 0.5586
vn -0.5341 0.2336 0.8125
vn -0.2465 0.1033 0.9636
vn -0.3331 0.1412 0.9323
vn -0.1335 0.0622 0.9891
vn -0.2181 0.0908 0.9717
vn -0.5039 0.2218 0.8348
vn -0.3340 0.1414 0.9319
vn -0.6460 0.2641 0.7162
vn -0.8368 0.3415 0.4280
vn -0.8212 0.3695 0.4349
vn -0.5821 0.2448 0.7754
vn -0.7166 0.3280 0.6156
vn -0.4720 0.2090 0.8564
vn -0.3052 0.1333 0.9429
vn -0.9117 0.3846 0.1443
vn -0.9190 0.3937 0.0190
vn -0.9023 0.4066 0.1432
vn -0.6662 0.2777 0.6921
vn -0.8442 0.3488 0.4069
vn -0.8294 0.3738 0.4152
vn -0.6078 0.2514 0.7533
vn -0.9143 0.3818 0.1352
vn -0.9018 0.4114 0.1322
vn -0.9094 0.3990 0.1171
vn -0.7384 0.3361 0.5846
vn -0.9071 0.3997 0.1318
vn -0.8832 0.3862 0.2662
vn -0.8769 0.3857 0.2867
vn -0.6484 0.2531 0.7180
vn -0.8398 0.3564 0.4095
vn -0.8094 0.3487 0.4726
vn -0.5587 0.2349 0.7954
vn -0.9180 0.3935 0.0488
vn -0.9190 0.3938 0.0181
vn -0.9199 0.3917 0.0187
vn -0.9183 0.3716 0.1368
vn -0.9184 0.3953 0.0189
vn -0.9039 0.4017 0.1472
vn -0.8838 0.3944 0.2516
vn -0.9094 0.3991 0.1175
vn -0.9193 0.3930 0.0190
vn -0.9185 0.3742 0.1282
vn -0.6919 0.2837 0.6639
vn -0.8526 0.3474 0.3902
vn -0.8839 0.3446 0.3163
vn -0.8830 0.3862 0.2668
vn -0.9018 0.4113 0.1325
vn -0.0481 0.0249 0.9985
vn -0.1091 0.0563 0.9924
vn -0.3043 0.1330 0.9432
vn -0.2173 0.0905 0.9719
vn -0.5535 0.2313 0.8001
vn -0.7749 0.3383 0.5338
vn -0.7163 0.3165 0.6218
vn -0.4672 0.2023 0.8607
vn -0.1907 0.0814 0.9783
vn -0.2752 0.1123 0.9548
vn -0.5813 0.2445 0.7761
vn -0.8209 0.3694 0.4355
vn -0.7378 0.3359 0.5855
vn -0.5030 0.2213 0.8355
vn -0.8440 0.3487 0.4075
vn -0.6657 0.2773 0.6928
vn -0.8768 0.3857 0.2872
vn -0.9071 0.3997 0.1322
vn -0.9142 0.3819 0.1355
vn -0.9023 0.4064 0.1435
vn -0.9223 0.3690 0.1151
vn -0.9119 0.3841 0.1445
vn -0.8374 0.3418 0.4265
vn -0.6454 0.2637 0.7169
vn -0.8820 0.3546 0.3105
vn -0.6916 0.2835 0.6643
vn -0.8530 0.3471 0.3898
vn -0.8449 0.3671 0.3890
vn -0.6466 0.2582 0.7178
vn -0.7554 0.3417 0.5591
vn -0.5330 0.2334 0.8133
vn -0.3620 0.1552 0.9192
vn -0.9183 0.3751 0.1263
vn -0.9025 0.4119 0.1258
vn -0.6651 0.2770 0.6935
vn -0.8438 0.3485 0.4080
vn -0.8289 0.3736 0.4163
vn -0.6063 0.2511 0.7546
vn -0.9141 0.3820 0.1358
vn -0.9019 0.4111 0.1329
vn -0.9093 0.3991 0.1180
vn -0.9100 0.4019 0.1014
vn -0.8828 0.3862 0.2674
vn -0.8849 0.3960 0.2453
vn 0.6389 0.2547 0.7259
vn 0.8417 0.3670 0.3962
vn 0.8517 0.3473 0.3925
vn 0.6861 0.2828 0.6703
vn 0.9029 0.4106 0.1269
vn 0.9199 0.3918 0.0187
vn 0.9179 0.3754 0.1285
vn 0.9104 0.4006 0.1036
vn 0.3542 0.1503 0.9230
vn 0.5256 0.2314 0.8186
vn 0.2379 0.1001 0.9661
vn 0.1510 0.0693 0.9861
vn 0.6007 0.2490 0.7597
vn 0.8276 0.3714 0.4208
vn 0.8426 0.3458 0.4128
vn 0.6610 0.2725 0.6992
vn 0.7330 0.3322 0.5936
vn 0.4949 0.2165 0.8416
vn 0.3253 0.1384 0.9354
vn 0.9027 0.4084 0.1357
vn 0.9199 0.3918 0.0186
vn 0.9140 0.3815 0.1383
vn 0.7522 0.3410 0.5639
vn 0.9093 0.3979 0.1216
vn 0.8844 0.3937 0.2507
vn 0.8819 0.3847 0.2725
vn 0.5734 0.2417 0.7828
vn 0.8192 0.3668 0.4408
vn 0.8367 0.3353 0.4329
vn 0.6387 0.2582 0.7248
vn 0.9031 0.4037 0.1464
vn 0.9122 0.3826 0.1469
vn 0.9072 0.3980 0.1359
vn 0.9224 0.3674 0.1190
vn 0.9101 0.4008 0.1050
vn 0.8760 0.3838 0.2923
vn 0.8815 0.3487 0.3185
vn 0.8837 0.3931 0.2542
vn 0.0251 0.0129 0.9996
vn 0.0607 0.0311 0.9977
vn 0.0046 0.0035 1.0000
vn 0.0005 0.0005 1.0000
vn 0.1263 0.0597 0.9902
vn 0.2093 0.0869 0.9740
vn 0.0438 0.0230 0.9988
vn 0.0166 0.0085 0.9998
vn -0.0023 -0.0023 1.0000
vn -0.0115 -0.0069 0.9999
vn 0.0021 0.0021 1.0000
vn 0.2954 0.1303 0.9464
vn 0.4543 0.1936 0.8696
vn 0.1838 0.0787 0.9798
vn 0.1031 0.0548 0.9932
vn 0.5365 0.2209 0.8144
vn 0.7621 0.3273 0.5586
vn 0.8386 0.3681 0.4016
vn 0.6328 0.2540 0.7315
vn 0.3503 0.1484 0.9248
vn 0.2666 0.1047 0.9581
vn 0.0110 0.0067 0.9999
vn 0.0327 0.0176 0.9993
vn 0.0013 0.0013 1.0000
vn 0.0762 0.0388 0.9963
vn 0.1477 0.0679 0.9867
vn 0.0240 0.0123 0.9996
vn 0.0076 0.0050 1.0000
vn 0.7078 0.3000 0.6396
vn 0.9028 0.4108 0.1275
vn 0.5215 0.2298 0.8217
vn 0.7498 0.3402 0.5675
vn 0.8265 0.3708 0.4235
vn 0.5974 0.2481 0.7626
vn 0.8503 0.3478 0.3949
vn 0.6822 0.2822 0.6745
vn 0.8811 0.3847 0.2752
vn 0.9173 0.3765 0.1296
vn 0.9090 0.3980 0.1235
vn 0.9027 0.4078 0.1371
vn 0.9143 0.3804 0.1390
vn 0.9203 0.3909 0.0177
vn 0.9225 0.3857 0.0131
vn 0.9200 0.3712 0.1259
vn 0.2342 0.0984 0.9672
vn 0.3217 0.1371 0.9369
vn 0.1231 0.0587 0.9907
vn 0.0585 0.0299 0.9978
vn 0.4910 0.2146 0.8443
vn 0.7304 0.3311 0.5974
vn 0.8145 0.3563 0.4578
vn 0.5698 0.2408 0.7857
vn 0.2914 0.1293 0.9478
vn 0.2055 0.0855 0.9749
vn 0.8416 0.3442 0.4162
vn 0.6585 0.2707 0.7022
vn 0.8856 0.3505 0.3048
vn 0.8877 0.3970 0.2331
vn 0.4487 0.1902 0.8732
vn 0.7040 0.2932 0.6469
vn 0.7559 0.3232 0.5694
vn 0.5288 0.2175 0.8204
vn 0.8267 0.3427 0.4462
vn 0.6357 0.2563 0.7281
vn 0.8795 0.3490 0.3237
vn 0.9058 0.3992 0.1416
vn 0.9173 0.3979 0.0132
vn 0.9195 0.3926 0.0176
vn 0.9210 0.3705 0.1206
vn 0.6264 0.2536 0.7371
vn 0.8353 0.3693 0.4072
vn 0.8489 0.3482 0.3976
vn 0.6782 0.2814 0.6789
vn 0.9026 0.4110 0.1280
vn 0.9167 0.3775 0.1308
vn 0.9099 0.4009 0.1062
vn 0.9200 0.3919 0.0092
vn 0.9194 0.3917 0.0356
vn 0.8830 0.3925 0.2575
vn -0.7373 0.3356 0.5863
vn -0.9070 0.3997 0.1325
vn -0.8766 0.3856 0.2877
vn 0.9087 0.3981 0.1255
vn 0.8802 0.3846 0.2779
vn -0.1068 -0.0552 0.9927
vn -0.0469 -0.0240 0.9986
vn -0.2159 -0.0882 0.9724
vn -0.3015 -0.1306 0.9445
vn -0.0185 -0.0090 0.9998
vn -0.0055 -0.0040 1.0000
vn -0.0657 -0.0332 0.9973
vn -0.1327 -0.0610 0.9893
vn -0.5028 -0.2174 0.8366
vn -0.7387 -0.3309 0.5872
vn -0.8225 -0.3640 0.4372
vn -0.5800 -0.2404 0.7783
vn -0.6671 -0.2728 0.6932
vn -0.8460 -0.3433 0.4080
vn -0.8790 -0.3798 0.2884
vn -0.9165 -0.3763 0.1359
vn -0.9095 -0.3938 0.1331
vn -0.9049 -0.4004 0.1445
vn -0.5380 -0.2303 0.8108
vn -0.7587 -0.3365 0.5578
vn -0.8316 -0.3687 0.4153
vn -0.6091 -0.2473 0.7535
vn -0.3342 -0.1390 0.9322
vn -0.2491 -0.1020 0.9631
vn -0.9044 -0.4057 0.1323
vn -0.0008 -0.0008 1.0000
vn -0.0092 -0.0058 0.9999
vn -0.0278 -0.0144 0.9995
vn 0.0004 0.0004 1.0000
vn -0.0017 -0.0017 1.0000
vn -0.1620 -0.0727 0.9841
vn -0.0860 -0.0440 0.9953
vn -0.2807 -0.1148 0.9529
vn -0.3682 -0.1560 0.9166
vn -0.0374 -0.0200 0.9991
vn -0.0134 -0.0074 0.9999
vn -0.1159 -0.0566 0.9916
vn -0.1968 -0.0814 0.9771
vn -0.9211 -0.3678 0.1278
vn -0.9121 -0.3930 0.1168
vn -0.8555 -0.3416 0.3891
vn -0.8858 -0.3804 0.2657
vn -0.5654 -0.2337 0.7910
vn -0.8133 -0.3460 0.4678
vn -0.8440 -0.3507 0.4058
vn -0.6527 -0.2515 0.7146
vn -0.9210 -0.3660 0.1331
vn -0.9230 -0.3844 0.0172
vn -0.9217 -0.3877 0.0157
vn -0.9208 -0.3874 0.0452
vn -0.9066 -0.3962 0.1452
vn -0.9205 -0.3903 0.0173
vn -0.8877 -0.3897 0.2453
vn -0.5912 -0.2432 0.7690
vn -0.8258 -0.3658 0.4292
vn -0.8408 -0.3379 0.4230
vn -0.6533 -0.2633 0.7098
vn -0.4809 -0.2082 0.8517
vn -0.7240 -0.3251 0.6084
vn -0.3138 -0.1333 0.9401
vn -0.9047 -0.4022 0.1403
vn -0.9149 -0.3779 0.1421
vn -0.9103 -0.3938 0.1274
vn -0.8866 -0.3413 0.3120
vn -0.8813 -0.3803 0.2806
vn -0.6958 -0.2796 0.6615
vn 0.0042 0.0033 1.0000
vn 0.0156 0.0081 0.9998
vn 0.0418 0.0222 0.9989
vn 0.1004 0.0542 0.9935
vn 0.0105 0.0065 0.9999
vn 0.0020 0.0020 1.0000
vn -0.0032 -0.0028 1.0000
vn -0.0002 -0.0002 1.0000
vn -0.0218 -0.0108 0.9997
vn -0.0536 -0.0272 0.9982
vn -0.0011 -0.0011 1.0000
vn -0.0069 -0.0046 1.0000
vn 0.1809 0.0777 0.9804
vn 0.2634 0.1027 0.9592
vn 0.0740 0.0377 0.9965
vn 0.0316 0.0170 0.9994
vn 0.3467 0.1468 0.9264
vn 0.5177 0.2278 0.8247
vn 0.2306 0.0966 0.9682
vn 0.1446 0.0665 0.9873
vn 0.0012 0.0012 1.0000
vn 0.0072 0.0048 1.0000
vn 0.0229 0.0116 0.9997
vn 0.0562 0.0288 0.9980
vn 0.0038 0.0031 1.0000
vn 0.0003 0.0003 1.0000
vn -0.2274 -0.0935 0.9693
vn -0.1425 -0.0647 0.9877
vn -0.3467 -0.1428 0.9270
vn -0.5151 -0.2235 0.8274
vn -0.0728 -0.0368 0.9967
vn -0.0313 -0.0166 0.9994
vn -0.1756 -0.0775 0.9814
vn -0.2636 -0.1066 0.9587
vn -0.6245 -0.2482 0.7405
vn -0.8380 -0.3673 0.4035
vn -0.8495 -0.3442 0.3997
vn -0.6770 -0.2773 0.6817
vn -0.9045 -0.4067 0.1285
vn -0.9180 -0.3740 0.1319
vn -0.9133 -0.3916 0.1119
vn -0.6615 -0.2591 0.7037
vn -0.8595 -0.3383 0.3832
vn -0.8589 -0.3438 0.3796
vn -0.7057 -0.2880 0.6473
vn -0.5569 -0.2362 0.7963
vn -0.7699 -0.3411 0.5394
vn -0.3848 -0.1635 0.9084
vn -0.9133 -0.3805 0.1453
vn -0.9234 -0.3629 0.1251
vn -0.7465 -0.3346 0.5751
vn -0.8886 -0.3794 0.2578
vn -0.0105 -0.0065 0.9999
vn -0.0020 -0.0020 1.0000
vn -0.0426 -0.0222 0.9988
vn -0.0957 -0.0484 0.9942
vn -0.0046 -0.0035 1.0000
vn -0.0163 -0.0082 0.9998
vn -0.4942 -0.2134 0.8427
vn -0.7332 -0.3284 0.5954
vn -0.8209 -0.3607 0.4428
vn -0.5764 -0.2394 0.7813
vn -0.2937 -0.1235 0.9479
vn -0.2078 -0.0850 0.9745
vn -0.1258 -0.0588 0.9903
vn -0.0608 -0.0308 0.9977
vn -0.2393 -0.0989 0.9659
vn -0.3256 -0.1366 0.9356
vn -0.9066 -0.3965 0.1447
vn -0.9156 -0.3773 0.1388
vn -0.9090 -0.3936 0.1367
vn -0.5279 -0.2289 0.8179
vn -0.7540 -0.3372 0.5637
vn -0.8293 -0.3676 0.4209
vn -0.6018 -0.2461 0.7598
vn -0.6895 -0.2792 0.6683
vn -0.8538 -0.3426 0.3920
vn -0.8839 -0.3805 0.2720
vn -0.9199 -0.3706 0.1283
vn -0.9113 -0.3935 0.1213
vn -0.9045 -0.4042 0.1357
vn -0.8439 -0.3417 0.4135
vn -0.6618 -0.2689 0.6998
vn -0.8775 -0.3794 0.2933
vn 0.5942 0.2470 0.7655
vn 0.8254 0.3702 0.4261
vn 0.8407 0.3432 0.4188
vn 0.6561 0.2688 0.7052
vn 0.7278 0.3300 0.6012
vn 0.4860 0.2138 0.8474
vn 0.3181 0.1357 0.9383
vn 0.9028 0.4071 0.1386
vn 0.9201 0.3912 0.0180
vn 0.9138 0.3811 0.1402
vn 0.5525 0.2544 0.7937
vn 0.8137 0.3532 0.4617
vn 0.8347 0.3995 0.3790
vn 0.5842 0.3244 0.7440
vn 0.9197 0.3710 0.1284
vn 0.9220 0.3869 0.0146
vn 0.9199 0.3921 0.0115
vn 0.9192 0.3919 0.0391
vn 0.8839 0.4675 0.0154
vn 0.8796 0.4561 0.1348
vn 0.8876 0.3952 0.2366
vn 0.1199 0.0577 0.9911
vn 0.1972 0.0913 0.9761
vn 0.0346 0.0387 0.9986
vn 0.0146 0.0078 0.9999
vn 0.2366 0.1910 0.9527
vn 0.1921 0.3422 0.9198
vn 0.0460 0.4042 0.9135
vn 0.0519 0.1842 0.9815
vn 0.8853 0.3489 0.3074
vn 0.1275 0.9355 0.3295
vn 0.0074 0.9361 0.3518
vn 0.0236 0.7320 0.6809
vn 0.1235 0.7007 0.7027
vn 0.1865 0.9823 0.0170
vn 0.0020 0.9888 0.1495
vn 0.1712 0.9754 0.1391
vn 0.5919 0.7350 0.3308
vn 0.4667 0.6055 0.6446
vn 0.6409 0.7674 0.0176
vn 0.6321 0.7637 0.1315
vn -0.0005 -0.0005 1.0000
vn -0.0254 -0.0129 0.9996
vn -0.0082 0.0211 0.9997
vn -0.0779 -0.0166 0.9968
vn -0.1530 -0.0692 0.9858
vn -0.0015 0.1777 0.9841
vn -0.0046 0.4140 0.9102
vn -0.0278 0.1585 0.9870
vn -0.5483 -0.2188 0.8072
vn -0.7738 -0.3302 0.5405
vn -0.8453 -0.3624 0.3925
vn -0.6440 -0.2526 0.7222
vn -0.3573 -0.1501 0.9219
vn -0.2678 -0.0920 0.9591
vn -0.1708 0.0838 0.9817
vn -0.0723 0.3603 0.9300
vn -0.1845 0.2243 0.9569
vn -0.4345 -0.0972 0.8954
vn -0.9246 -0.3629 0.1157
vn -0.9124 -0.3962 0.1023
vn -0.5563 0.0474 0.8296
vn -0.8304 -0.1661 0.5318
vn -0.8382 -0.3286 0.4353
vn -0.6022 -0.1850 0.7766
vn -0.9048 -0.4009 0.1432
vn -0.9144 -0.3782 0.1446
vn -0.9691 -0.2252 0.1008
vn -0.9797 -0.2001 0.0148
vn -0.8841 -0.3477 0.3121
vn -0.8868 -0.3901 0.2477
vn -0.9050 -0.4062 0.1267
vn -0.7157 -0.3076 0.6270
vn -0.8858 -0.1235 0.4473
vn -0.0210 0.9365 0.3501
vn -0.0643 0.6871 0.7237
vn -0.0108 0.7324 0.6808
vn -0.0088 0.9877 0.1560
vn -0.2152 0.9764 0.0171
vn -0.8425 0.5385 0.0147
vn -0.8211 0.5593 0.1138
vn -0.1971 0.9687 0.1510
vn -0.4173 0.7189 0.5559
vn -0.3836 0.5527 0.7398
vn -0.7523 0.4799 0.4514
vn 0.7475 0.3390 0.5713
vn 0.9189 -0.3940 -0.0186
vn 0.9069 -0.4003 -0.1317
vn 0.9141 -0.3824 -0.1352
vn 0.9092 -0.3996 -0.1172
vn 0.9183 -0.3746 -0.1280
vn 0.9190 -0.3937 -0.0190
vn 0.9015 -0.4120 -0.1323
vn 0.8291 -0.3743 -0.4153
vn 0.6075 -0.2517 -0.7534
vn 0.5347 -0.2341 -0.8120
vn 0.7560 -0.3421 -0.5581
vn 0.8526 -0.3479 -0.3901
vn 0.6921 -0.2842 -0.6635
vn 0.8829 -0.3868 -0.2663
vn 0.8440 -0.3494 -0.4069
vn 0.6660 -0.2782 -0.6921
vn 0.8767 -0.3863 -0.2866
vn 0.9187 -0.3945 -0.0177
vn 0.9178 -0.3941 -0.0482
vn 0.9181 -0.3723 -0.1363
vn 0.9197 -0.3922 -0.0185
vn 0.9188 -0.3943 -0.0190
vn 0.9116 -0.3851 -0.1442
vn 0.9020 -0.4072 -0.1431
vn 0.9069 -0.4003 -0.1316
vn 0.8367 -0.3422 -0.4275
vn 0.6464 -0.2649 -0.7156
vn 0.5825 -0.2452 -0.7750
vn 0.8211 -0.3701 -0.4346
vn 0.9141 -0.3823 -0.1351
vn 0.9015 -0.4120 -0.1322
vn 0.8441 -0.3494 -0.4067
vn 0.6662 -0.2783 -0.6919
vn 0.6078 -0.2518 -0.7531
vn 0.8292 -0.3743 -0.4151
vn 0.7385 -0.3367 -0.5842
vn 0.5042 -0.2223 -0.8345
vn 0.3341 -0.1417 -0.9318
vn 0.9092 -0.3996 -0.1170
vn 0.8768 -0.3863 -0.2864
vn 0.8830 -0.3868 -0.2661
vn 0.9092 -0.3996 -0.1169
vn 0.9184 -0.3744 -0.1279
vn 0.9015 -0.4121 -0.1321
vn 0.8293 -0.3744 -0.4149
vn 0.6080 -0.2518 -0.7529
vn 0.5354 -0.2342 -0.8115
vn 0.7563 -0.3420 -0.5577
vn 0.8527 -0.3478 -0.3898
vn 0.6925 -0.2842 -0.6630
vn 0.8830 -0.3867 -0.2659
vn 0.8400 -0.3568 -0.4088
vn 0.6489 -0.2541 -0.7171
vn 0.5594 -0.2358 -0.7947
vn 0.8094 -0.3497 -0.4718
vn 0.3645 -0.1569 -0.9179
vn 0.2769 -0.1140 -0.9541
vn 0.1340 -0.0624 -0.9890
vn 0.0660 -0.0339 -0.9972
vn 0.2480 -0.1039 -0.9632
vn 0.3345 -0.1418 -0.9317
vn 0.0275 -0.0146 -0.9995
vn 0.0089 -0.0057 -0.9999
vn 0.0839 -0.0434 -0.9955
vn 0.1598 -0.0732 -0.9844
vn 0.9036 -0.4023 -0.1468
vn 0.9180 -0.3962 -0.0186
vn 0.8839 -0.3951 -0.2505
vn 0.1919 -0.0820 -0.9780
vn 0.1102 -0.0566 -0.9923
vn 0.3058 -0.1336 -0.9427
vn 0.4728 -0.2096 -0.8559
vn 0.0488 -0.0253 -0.9985
vn 0.0191 -0.0094 -0.9998
vn 0.1337 -0.0624 -0.9891
vn 0.2186 -0.0912 -0.9716
vn 0.0359 -0.0197 -0.9992
vn 0.8837 -0.3456 -0.3157
vn 0.7171 -0.3286 -0.6147
vn 0.9183 -0.3745 -0.1280
vn 0.9036 -0.4023 -0.1470
vn 0.9180 -0.3961 -0.0187
vn 0.9187 -0.3945 -0.0178
vn 0.9178 -0.3941 -0.0484
vn 0.8526 -0.3478 -0.3899
vn 0.6923 -0.2842 -0.6633
vn 0.6487 -0.2540 -0.7174
vn 0.8399 -0.3568 -0.4090
vn 0.9181 -0.3722 -0.1365
vn 0.9115 -0.3851 -0.1442
vn 0.8093 -0.3495 -0.4721
vn 0.5591 -0.2356 -0.7949
vn 0.4725 -0.2095 -0.8561
vn 0.7168 -0.3285 -0.6150
vn 0.8367 -0.3421 -0.4277
vn 0.6461 -0.2647 -0.7158
vn 0.8836 -0.3455 -0.3159
vn 0.2476 -0.1038 -0.9633
vn 0.1595 -0.0731 -0.9845
vn 0.3641 -0.1566 -0.9181
vn 0.5350 -0.2341 -0.8117
vn 0.0837 -0.0433 -0.9955
vn 0.0358 -0.0197 -0.9992
vn 0.1917 -0.0819 -0.9780
vn 0.2766 -0.1138 -0.9542
vn 0.7562 -0.3421 -0.5579
vn 0.8838 -0.3950 -0.2509
vn 0.8210 -0.3701 -0.4348
vn 0.5822 -0.2452 -0.7752
vn 0.5038 -0.2221 -0.8347
vn 0.7383 -0.3366 -0.5845
vn 0.3055 -0.1335 -0.9428
vn 0.2183 -0.0911 -0.9716
vn 0.1335 -0.0623 -0.9891
vn 0.0657 -0.0337 -0.9973
vn 0.2473 -0.1037 -0.9634
vn 0.3338 -0.1416 -0.9319
vn 0.0121 -0.0073 -0.9999
vn 0.0486 -0.0252 -0.9985
vn 0.1100 -0.0565 -0.9923
vn 0.0056 -0.0040 -1.0000
vn 0.0190 -0.0094 -0.9998
vn 0.0275 -0.0145 -0.9995
vn 0.0658 -0.0338 -0.9973
vn -0.0120 0.0072 -0.9999
vn -0.0354 0.0194 -0.9992
vn -0.0826 0.0426 -0.9957
vn -0.0087 0.0056 -0.9999
vn -0.0007 0.0007 -1.0000
vn -0.0054 0.0039 -1.0000
vn -0.0185 0.0092 -0.9998
vn -0.0477 0.0248 -0.9986
vn -0.1577 0.0722 -0.9849
vn -0.2455 0.1030 -0.9639
vn -0.0647 0.0332 -0.9974
vn -0.0269 0.0142 -0.9995
vn -0.3322 0.1409 -0.9326
vn -0.5020 0.2209 -0.8362
vn -0.2164 0.0902 -0.9721
vn -0.1321 0.0617 -0.9893
vn 0.9021 -0.4072 -0.1432
vn 0.9187 -0.3945 -0.0179
vn 0.9178 -0.3941 -0.0485
vn 0.9180 -0.3722 -0.1366
vn 0.9196 -0.3923 -0.0186
vn 0.9115 -0.3852 -0.1443
vn 0.9789 -0.2038 -0.0148
vn 0.9682 -0.2286 -0.1013
vn 0.8351 -0.3350 -0.4364
vn 0.6012 -0.1891 -0.7764
vn 0.5558 0.0449 -0.8301
vn 0.8288 -0.1703 -0.5330
vn 0.8397 -0.3569 -0.4093
vn 0.6485 -0.2538 -0.7176
vn 0.5562 -0.2294 -0.7987
vn 0.8091 -0.3490 -0.4728
vn 0.3637 -0.1564 -0.9183
vn 0.2713 -0.0977 -0.9575
vn 0.1720 0.0817 -0.9817
vn 0.0725 0.3600 -0.9301
vn 0.1845 0.2235 -0.9571
vn 0.4407 -0.1083 -0.8911
vn 0.9181 -0.3960 -0.0187
vn 0.9036 -0.4023 -0.1471
vn 0.8837 -0.3950 -0.2512
vn 0.7155 -0.3276 -0.6170
vn 0.8844 -0.1263 -0.4493
vn 0.8836 -0.3453 -0.3162
vn 0.8207 0.5599 -0.1141
vn 0.1961 0.9689 -0.1508
vn 0.2142 0.9766 -0.0171
vn 0.8419 0.5394 -0.0148
vn 0.0088 0.9877 -0.1559
vn -0.0000 0.9890 -0.1477
vn -0.0000 0.9998 -0.0187
vn 0.0642 0.6867 -0.7241
vn 0.0109 0.7322 -0.6810
vn -0.0000 0.9377 -0.3475
vn 0.0208 0.9365 -0.3502
vn 0.3834 0.5518 -0.7406
vn 0.4163 0.7188 -0.5568
vn 0.7512 0.4802 -0.4529
vn 0.0274 -0.0145 -0.9995
vn 0.0089 0.0208 -0.9997
vn 0.0812 -0.0191 -0.9965
vn 0.1592 -0.0729 -0.9846
vn 0.0016 0.1775 -0.9841
vn 0.0000 0.4180 -0.9085
vn 0.0047 0.4139 -0.9103
vn 0.0287 0.1576 -0.9871
vn 0.0000 0.0264 -0.9997
vn 0.0000 0.1791 -0.9838
vn 0.0000 0.7430 -0.6693
vn -0.0000 0.7430 -0.6692
vn -0.1085 0.0561 -0.9925
vn -0.1850 0.0895 -0.9786
vn -0.0303 0.0377 -0.9988
vn -0.0119 0.0072 -0.9999
vn -0.2220 0.1828 -0.9578
vn -0.1721 0.3368 -0.9257
vn -0.0334 0.4030 -0.9146
vn -0.0437 0.1815 -0.9824
vn -0.9192 0.3934 -0.0186
vn -0.9119 0.3841 -0.1448
vn -0.9023 0.4063 -0.1438
vn -0.8373 0.3413 -0.4271
vn -0.6446 0.2633 -0.7177
vn -0.5804 0.2443 -0.7768
vn -0.8207 0.3693 -0.4361
vn -0.4645 0.2031 -0.8620
vn -0.7155 0.3152 -0.6235
vn -0.3034 0.1328 -0.9436
vn -0.9100 0.4019 -0.1017
vn -0.9222 0.3690 -0.1155
vn -0.8634 0.4902 -0.1191
vn -0.8747 0.4844 -0.0182
vn -0.8290 0.4169 -0.3728
vn -0.5711 0.3307 -0.7513
vn -0.5327 0.2452 -0.8100
vn -0.7738 0.3375 -0.5360
vn -0.8818 0.3542 -0.3113
vn -0.8847 0.3958 -0.2462
vn -0.1630 0.9775 -0.1337
vn -0.1798 0.9836 -0.0170
vn -0.0112 0.7339 -0.6792
vn -0.1035 0.7072 -0.6994
vn -0.1143 0.9413 -0.3177
vn -0.0006 0.9374 -0.3484
vn -0.6116 0.7808 -0.1272
vn -0.6165 0.7872 -0.0170
vn -0.4509 0.6185 -0.6436
vn -0.5787 0.7474 -0.3263
vn 0.0192 -0.0094 -0.9998
vn -0.0190 0.0094 -0.9998
vn -0.0485 0.0251 -0.9985
vn -0.1097 0.0564 -0.9924
vn -0.1913 0.0816 -0.9781
vn -0.0356 0.0195 -0.9992
vn -0.0121 0.0073 -0.9999
vn -0.0088 0.0056 -0.9999
vn -0.0272 0.0143 -0.9995
vn -0.0652 0.0334 -0.9973
vn -0.1328 0.0620 -0.9892
vn -0.0188 0.0093 -0.9998
vn -0.0055 0.0040 -1.0000
vn -0.2760 0.1130 -0.9545
vn -0.3631 0.1558 -0.9186
vn -0.1586 0.0726 -0.9847
vn -0.0832 0.0429 -0.9956
vn -0.8292 0.3737 -0.4158
vn -0.6070 0.2512 -0.7540
vn -0.5340 0.2336 -0.8126
vn -0.7558 0.3416 -0.5586
vn -0.3330 0.1412 -0.9323
vn -0.2465 0.1033 -0.9636
vn -0.3339 0.1414 -0.9319
vn -0.5038 0.2217 -0.8349
vn -0.2181 0.0908 -0.9717
vn -0.1335 0.0622 -0.9891
vn -0.9190 0.3937 -0.0190
vn -0.9117 0.3846 -0.1444
vn -0.9023 0.4066 -0.1433
vn -0.9192 0.3934 -0.0187
vn -0.8368 0.3415 -0.4280
vn -0.6460 0.2641 -0.7162
vn -0.5821 0.2447 -0.7754
vn -0.8211 0.3695 -0.4350
vn -0.4720 0.2090 -0.8565
vn -0.7165 0.3279 -0.6157
vn -0.3051 0.1332 -0.9429
vn -0.9143 0.3818 -0.1352
vn -0.9018 0.4114 -0.1322
vn -0.9094 0.3990 -0.1171
vn -0.8442 0.3488 -0.4070
vn -0.6662 0.2777 -0.6922
vn -0.6077 0.2513 -0.7533
vn -0.8294 0.3738 -0.4152
vn -0.7384 0.3361 -0.5847
vn -0.9071 0.3997 -0.1318
vn -0.8832 0.3862 -0.2662
vn -0.8769 0.3857 -0.2867
vn -0.9190 0.3938 -0.0181
vn -0.9180 0.3935 -0.0488
vn -0.9183 0.3716 -0.1368
vn -0.9199 0.3917 -0.0188
vn -0.9039 0.4017 -0.1473
vn -0.9184 0.3953 -0.0189
vn -0.8838 0.3944 -0.2517
vn -0.8398 0.3564 -0.4096
vn -0.6484 0.2531 -0.7180
vn -0.5586 0.2349 -0.7955
vn -0.8093 0.3487 -0.4727
vn -0.9094 0.3991 -0.1176
vn -0.9185 0.3741 -0.1283
vn -0.9193 0.3930 -0.0190
vn -0.8526 0.3474 -0.3903
vn -0.6919 0.2837 -0.6640
vn -0.8839 0.3446 -0.3163
vn -0.8830 0.3862 -0.2669
vn -0.9018 0.4113 -0.1326
vn -0.2173 0.0905 -0.9719
vn -0.3043 0.1330 -0.9433
vn -0.1091 0.0563 -0.9924
vn -0.0481 0.0249 -0.9985
vn -0.7749 0.3383 -0.5339
vn -0.5535 0.2313 -0.8001
vn -0.4672 0.2023 -0.8607
vn -0.7163 0.3165 -0.6219
vn -0.2752 0.1123 -0.9548
vn -0.1907 0.0814 -0.9783
vn -0.9070 0.3997 -0.1322
vn -0.9142 0.3819 -0.1355
vn -0.9023 0.4065 -0.1435
vn -0.8209 0.3694 -0.4355
vn -0.5812 0.2445 -0.7761
vn -0.5029 0.2213 -0.8355
vn -0.7378 0.3358 -0.5855
vn -0.6656 0.2773 -0.6929
vn -0.8440 0.3487 -0.4075
vn -0.8768 0.3857 -0.2872
vn -0.9223 0.3689 -0.1151
vn -0.9119 0.3841 -0.1445
vn -0.6453 0.2637 -0.7170
vn -0.8374 0.3418 -0.4265
vn -0.8820 0.3545 -0.3106
vn -0.9183 0.3751 -0.1264
vn -0.9025 0.4119 -0.1259
vn -0.8530 0.3471 -0.3898
vn -0.6915 0.2835 -0.6644
vn -0.6465 0.2582 -0.7179
vn -0.8449 0.3671 -0.3891
vn -0.5330 0.2334 -0.8133
vn -0.7553 0.3417 -0.5592
vn -0.3620 0.1552 -0.9192
vn -0.9141 0.3820 -0.1358
vn -0.9018 0.4111 -0.1329
vn -0.9093 0.3991 -0.1180
vn -0.8438 0.3485 -0.4081
vn -0.6651 0.2769 -0.6935
vn -0.6062 0.2511 -0.7546
vn -0.8289 0.3736 -0.4163
vn -0.9101 0.4019 -0.1014
vn -0.8828 0.3862 -0.2675
vn -0.8849 0.3960 -0.2454
vn 0.9199 0.3918 -0.0187
vn 0.9029 0.4106 -0.1270
vn 0.9179 0.3754 -0.1285
vn 0.9104 0.4006 -0.1037
vn 0.8416 0.3670 -0.3962
vn 0.6388 0.2547 -0.7260
vn 0.6861 0.2828 -0.6703
vn 0.8516 0.3473 -0.3925
vn 0.1510 0.0693 -0.9861
vn 0.2379 0.1000 -0.9661
vn 0.5256 0.2314 -0.8187
vn 0.3542 0.1503 -0.9230
vn 0.9027 0.4084 -0.1357
vn 0.9140 0.3815 -0.1384
vn 0.8276 0.3714 -0.4208
vn 0.6007 0.2490 -0.7597
vn 0.6610 0.2725 -0.6992
vn 0.8426 0.3458 -0.4128
vn 0.4948 0.2165 -0.8416
vn 0.7329 0.3322 -0.5937
vn 0.3253 0.1383 -0.9354
vn 0.7521 0.3410 -0.5639
vn 0.9093 0.3979 -0.1216
vn 0.8844 0.3937 -0.2508
vn 0.8819 0.3847 -0.2725
vn 0.9031 0.4037 -0.1464
vn 0.9122 0.3826 -0.1469
vn 0.9072 0.3981 -0.1359
vn 0.8192 0.3668 -0.4409
vn 0.5734 0.2416 -0.7828
vn 0.6387 0.2582 -0.7248
vn 0.8367 0.3353 -0.4329
vn 0.9224 0.3674 -0.1191
vn 0.9101 0.4008 -0.1050
vn 0.8760 0.3838 -0.2923
vn 0.8815 0.3487 -0.3185
vn 0.8837 0.3931 -0.2542
vn 0.0005 0.0005 -1.0000
vn 0.0046 0.0035 -1.0000
vn 0.0608 0.0311 -0.9977
vn 0.0251 0.0129 -0.9996
vn 0.0166 0.0085 -0.9998
vn 0.0438 0.0230 -0.9988
vn 0.2092 0.0869 -0.9740
vn 0.1262 0.0597 -0.9902
vn -0.0115 -0.0069 -0.9999
vn -0.0023 -0.0023 -1.0000
vn 0.0021 0.0021 -1.0000
vn 0.1030 0.0548 -0.9932
vn 0.1838 0.0787 -0.9798
vn 0.4542 0.1936 -0.8696
vn 0.2953 0.1303 -0.9465
vn 0.7621 0.3273 -0.5586
vn 0.5365 0.2209 -0.8145
vn 0.6328 0.2540 -0.7315
vn 0.8386 0.3681 -0.4016
vn 0.2666 0.1047 -0.9581
vn 0.3502 0.1484 -0.9248
vn 0.0013 0.0013 -1.0000
vn 0.0327 0.0176 -0.9993
vn 0.0110 0.0067 -0.9999
vn 0.0076 0.0050 -1.0000
vn 0.0240 0.0123 -0.9996
vn 0.1477 0.0678 -0.9867
vn 0.0762 0.0388 -0.9963
vn 0.7078 0.3000 -0.6396
vn 0.9028 0.4108 -0.1275
vn 0.9173 0.3765 -0.1297
vn 0.9090 0.3980 -0.1236
vn 0.9027 0.4078 -0.1372
vn 0.7498 0.3402 -0.5674
vn 0.5215 0.2298 -0.8217
vn 0.5974 0.2480 -0.7626
vn 0.8265 0.3708 -0.4235
vn 0.6822 0.2822 -0.6745
vn 0.8503 0.3478 -0.3949
vn 0.8810 0.3847 -0.2752
vn 0.9203 0.3909 -0.0177
vn 0.9143 0.3804 -0.1390
vn 0.9200 0.3712 -0.1259
vn 0.9225 0.3857 -0.0131
vn 0.0585 0.0299 -0.9978
vn 0.1231 0.0587 -0.9907
vn 0.3216 0.1370 -0.9369
vn 0.2341 0.0983 -0.9672
vn 0.7304 0.3311 -0.5975
vn 0.4909 0.2146 -0.8444
vn 0.5697 0.2408 -0.7858
vn 0.8145 0.3563 -0.4578
vn 0.2055 0.0854 -0.9749
vn 0.2914 0.1293 -0.9478
vn 0.6585 0.2706 -0.7022
vn 0.8416 0.3441 -0.4162
vn 0.8856 0.3505 -0.3048
vn 0.8877 0.3970 -0.2331
vn 0.9173 0.3979 -0.0132
vn 0.9058 0.3992 -0.1416
vn 0.9210 0.3705 -0.1206
vn 0.9195 0.3926 -0.0177
vn 0.7039 0.2932 -0.6469
vn 0.4487 0.1902 -0.8732
vn 0.5287 0.2175 -0.8204
vn 0.7559 0.3232 -0.5694
vn 0.6357 0.2562 -0.7282
vn 0.8267 0.3427 -0.4462
vn 0.8795 0.3490 -0.3237
vn 0.9026 0.4110 -0.1281
vn 0.9167 0.3775 -0.1308
vn 0.9099 0.4009 -0.1062
vn 0.8354 0.3693 -0.4072
vn 0.6264 0.2535 -0.7371
vn 0.6782 0.2814 -0.6789
vn 0.8489 0.3482 -0.3976
vn 0.9194 0.3918 -0.0357
vn 0.9200 0.3919 -0.0092
vn 0.8830 0.3925 -0.2575
vn -0.7373 0.3356 -0.5864
vn -0.9070 0.3997 -0.1326
vn -0.8766 0.3857 -0.2878
vn 0.9087 0.3981 -0.1255
vn 0.8802 0.3846 -0.2779
vn -0.3014 -0.1306 -0.9445
vn -0.2159 -0.0882 -0.9724
vn -0.0469 -0.0240 -0.9986
vn -0.1068 -0.0552 -0.9927
vn -0.1326 -0.0610 -0.9893
vn -0.0657 -0.0332 -0.9973
vn -0.0055 -0.0040 -1.0000
vn -0.0185 -0.0090 -0.9998
vn -0.9165 -0.3763 -0.1359
vn -0.9095 -0.3938 -0.1331
vn -0.9049 -0.4004 -0.1445
vn -0.7387 -0.3309 -0.5872
vn -0.5028 -0.2174 -0.8366
vn -0.5800 -0.2404 -0.7784
vn -0.8224 -0.3639 -0.4372
vn -0.8459 -0.3433 -0.4081
vn -0.6671 -0.2728 -0.6932
vn -0.8789 -0.3798 -0.2884
vn -0.7587 -0.3365 -0.5578
vn -0.5380 -0.2303 -0.8109
vn -0.6091 -0.2473 -0.7536
vn -0.8316 -0.3686 -0.4154
vn -0.2491 -0.1020 -0.9631
vn -0.3341 -0.1390 -0.9322
vn -0.9044 -0.4057 -0.1323
vn -0.0278 -0.0144 -0.9995
vn -0.0092 -0.0058 -0.9999
vn -0.0008 -0.0008 -1.0000
vn -0.0017 -0.0017 -1.0000
vn 0.0004 0.0004 -1.0000
vn -0.3682 -0.1560 -0.9166
vn -0.2807 -0.1148 -0.9529
vn -0.0860 -0.0440 -0.9953
vn -0.1620 -0.0727 -0.9841
vn -0.1968 -0.0814 -0.9771
vn -0.1159 -0.0566 -0.9917
vn -0.0134 -0.0074 -0.9999
vn -0.0374 -0.0200 -0.9991
vn -0.9211 -0.3678 -0.1278
vn -0.9121 -0.3930 -0.1168
vn -0.8555 -0.3416 -0.3891
vn -0.8858 -0.3804 -0.2657
vn -0.9230 -0.3844 -0.0172
vn -0.9210 -0.3660 -0.1331
vn -0.9208 -0.3874 -0.0452
vn -0.9217 -0.3877 -0.0157
vn -0.9205 -0.3903 -0.0173
vn -0.9066 -0.3962 -0.1452
vn -0.8877 -0.3897 -0.2453
vn -0.8132 -0.3460 -0.4679
vn -0.5653 -0.2337 -0.7911
vn -0.6527 -0.2515 -0.7147
vn -0.8440 -0.3507 -0.4059
vn -0.9047 -0.4022 -0.1403
vn -0.9149 -0.3779 -0.1422
vn -0.8258 -0.3658 -0.4292
vn -0.5912 -0.2432 -0.7690
vn -0.6533 -0.2633 -0.7098
vn -0.8408 -0.3379 -0.4230
vn -0.7240 -0.3251 -0.6084
vn -0.4809 -0.2082 -0.8517
vn -0.3137 -0.1333 -0.9401
vn -0.9103 -0.3938 -0.1275
vn -0.8866 -0.3413 -0.3121
vn -0.8813 -0.3803 -0.2806
vn -0.6958 -0.2796 -0.6616
vn 0.0156 0.0081 -0.9998
vn 0.0042 0.0033 -1.0000
vn 0.0020 0.0020 -1.0000
vn 0.0105 0.0065 -0.9999
vn 0.1004 0.0542 -0.9935
vn 0.0418 0.0222 -0.9989
vn -0.0536 -0.0272 -0.9982
vn -0.0218 -0.0108 -0.9997
vn -0.0002 -0.0002 -1.0000
vn -0.0032 -0.0028 -1.0000
vn -0.0069 -0.0046 -1.0000
vn -0.0011 -0.0011 -1.0000
vn 0.0316 0.0170 -0.9994
vn 0.0740 0.0377 -0.9965
vn 0.2634 0.1027 -0.9592
vn 0.1809 0.0777 -0.9804
vn 0.1446 0.0665 -0.9873
vn 0.2306 0.0965 -0.9682
vn 0.5177 0.2278 -0.8247
vn 0.3466 0.1468 -0.9264
vn 0.0072 0.0048 -1.0000
vn 0.0012 0.0012 -1.0000
vn 0.0003 0.0003 -1.0000
vn 0.0038 0.0031 -1.0000
vn 0.0562 0.0288 -0.9980
vn 0.0229 0.0116 -0.9997
vn -0.5151 -0.2235 -0.8275
vn -0.3467 -0.1428 -0.9271
vn -0.1425 -0.0647 -0.9877
vn -0.2274 -0.0935 -0.9693
vn -0.2636 -0.1066 -0.9587
vn -0.1755 -0.0775 -0.9814
vn -0.0313 -0.0165 -0.9994
vn -0.0728 -0.0368 -0.9967
vn -0.9045 -0.4068 -0.1285
vn -0.9180 -0.3740 -0.1319
vn -0.9133 -0.3916 -0.1120
vn -0.8380 -0.3673 -0.4035
vn -0.6245 -0.2482 -0.7406
vn -0.6770 -0.2773 -0.6818
vn -0.8495 -0.3442 -0.3998
vn -0.9133 -0.3805 -0.1453
vn -0.9234 -0.3629 -0.1251
vn -0.8594 -0.3383 -0.3833
vn -0.6615 -0.2591 -0.7038
vn -0.7057 -0.2880 -0.6474
vn -0.8589 -0.3438 -0.3796
vn -0.7699 -0.3411 -0.5394
vn -0.5568 -0.2362 -0.7963
vn -0.3848 -0.1635 -0.9084
vn -0.7465 -0.3345 -0.5751
vn -0.8886 -0.3793 -0.2578
vn -0.0957 -0.0484 -0.9942
vn -0.0426 -0.0223 -0.9988
vn -0.0020 -0.0020 -1.0000
vn -0.0105 -0.0065 -0.9999
vn -0.0163 -0.0082 -0.9998
vn -0.0046 -0.0035 -1.0000
vn -0.7332 -0.3284 -0.5954
vn -0.4942 -0.2134 -0.8428
vn -0.5763 -0.2394 -0.7814
vn -0.8208 -0.3607 -0.4429
vn -0.2078 -0.0850 -0.9745
vn -0.2936 -0.1235 -0.9479
vn -0.3256 -0.1366 -0.9356
vn -0.2393 -0.0989 -0.9659
vn -0.0608 -0.0308 -0.9977
vn -0.1258 -0.0588 -0.9903
vn -0.9065 -0.3965 -0.1448
vn -0.9156 -0.3773 -0.1388
vn -0.9090 -0.3936 -0.1368
vn -0.9199 -0.3706 -0.1283
vn -0.9113 -0.3935 -0.1213
vn -0.9045 -0.4042 -0.1357
vn -0.7540 -0.3372 -0.5637
vn -0.5279 -0.2289 -0.8179
vn -0.6018 -0.2460 -0.7598
vn -0.8293 -0.3676 -0.4209
vn -0.8538 -0.3426 -0.3920
vn -0.6895 -0.2792 -0.6684
vn -0.8839 -0.3805 -0.2721
vn -0.6617 -0.2689 -0.6999
vn -0.8439 -0.3417 -0.4136
vn -0.8775 -0.3794 -0.2934
vn 0.9028 0.4071 -0.1386
vn 0.9138 0.3811 -0.1403
vn 0.9201 0.3912 -0.0180
vn 0.8254 0.3702 -0.4262
vn 0.5942 0.2469 -0.7655
vn 0.6561 0.2688 -0.7052
vn 0.8407 0.3432 -0.4188
vn 0.4859 0.2138 -0.8475
vn 0.7278 0.3299 -0.6012
vn 0.3181 0.1357 -0.9383
vn 0.9220 0.3869 -0.0146
vn 0.9197 0.3710 -0.1285
vn 0.9192 0.3919 -0.0391
vn 0.9199 0.3921 -0.0116
vn 0.8796 0.4561 -0.1348
vn 0.8839 0.4675 -0.0154
vn 0.8876 0.3952 -0.2366
vn 0.8137 0.3532 -0.4617
vn 0.5524 0.2544 -0.7938
vn 0.5841 0.3244 -0.7440
vn 0.8347 0.3995 -0.3791
vn 0.0146 0.0078 -0.9999
vn 0.0346 0.0387 -0.9986
vn 0.1971 0.0912 -0.9761
vn 0.1199 0.0577 -0.9911
vn 0.0519 0.1842 -0.9815
vn 0.0460 0.4042 -0.9135
vn 0.1921 0.3421 -0.9198
vn 0.2365 0.1910 -0.9527
vn 0.8853 0.3489 -0.3075
vn 0.1712 0.9754 -0.1392
vn 0.0020 0.9888 -0.1495
vn 0.1865 0.9823 -0.0170
vn 0.1235 0.7006 -0.7028
vn 0.0236 0.7319 -0.6810
vn 0.0074 0.9360 -0.3518
vn 0.1275 0.9355 -0.3296
vn 0.6321 0.7637 -0.1315
vn 0.6409 0.7674 -0.0176
vn 0.4667 0.6055 -0.6447
vn 0.5919 0.7350 -0.3309
vn -0.0005 -0.0005 -1.0000
vn -0.1530 -0.0691 -0.9858
vn -0.0779 -0.0166 -0.9968
vn -0.0082 0.0211 -0.9997
vn -0.0254 -0.0129 -0.9996
vn -0.0278 0.1585 -0.9870
vn -0.0046 0.4140 -0.9103
vn -0.0015 0.1777 -0.9841
vn -0.7738 -0.3302 -0.5406
vn -0.5482 -0.2188 -0.8072
vn -0.6439 -0.2526 -0.7222
vn -0.8453 -0.3624 -0.3925
vn -0.2678 -0.0920 -0.9591
vn -0.3572 -0.1500 -0.9219
vn -0.4344 -0.0972 -0.8955
vn -0.1844 0.2243 -0.9569
vn -0.0722 0.3603 -0.9300
vn -0.1708 0.0838 -0.9817
vn -0.9246 -0.3629 -0.1158
vn -0.9124 -0.3962 -0.1023
vn -0.9048 -0.4009 -0.1432
vn -0.9144 -0.3782 -0.1447
vn -0.9797 -0.2001 -0.0148
vn -0.9691 -0.2252 -0.1008
vn -0.8304 -0.1662 -0.5319
vn -0.5562 0.0474 -0.8297
vn -0.6021 -0.1850 -0.7767
vn -0.8382 -0.3285 -0.4354
vn -0.9050 -0.4062 -0.1267
vn -0.8868 -0.3901 -0.2477
vn -0.8841 -0.3477 -0.3121
vn -0.7157 -0.3076 -0.6270
vn -0.8858 -0.1236 -0.4473
vn -0.0088 0.9877 -0.1560
vn -0.0108 0.7323 -0.6809
vn -0.0643 0.6871 -0.7238
vn -0.0210 0.9365 -0.3502
vn -0.1971 0.9687 -0.1510
vn -0.8211 0.5593 -0.1138
vn -0.8425 0.5385 -0.0148
vn -0.2152 0.9764 -0.0171
vn -0.3835 0.5527 -0.7399
vn -0.4173 0.7189 -0.5559
vn -0.7523 0.4799 -0.4514
vn 0.7474 0.3390 -0.5713
s 1
f 4//1 5//2 7//3 6//4
f 10//5 11//6 13//7 12//8
f 8//9 12//8 13//7 9//10
f 2//11 3//12 11//6 10//5
f 5//2 10//5 12//8 7//3
f 1//13 2//11 10//5 5//2
f 17//14 18//12 20//12 19//15
f 24//16 25//17 27//18 26//19
f 22//20 26//19 27//18 23//21
f 21//22 23//21 27//18 25//17
f 28//23 29//24 31//25 30//26
f 33//27 34//28 36//29 35//30
f 33//27 35//30 38//31 37//32
f 15//33 35//30 36//29 16//34
f 14//35 16//34 36//29 34//28
f 17//14 39//36 40//12 18//12
f 22//20 23//21 34//28 33//27
f 22//20 33//27 37//32 26//19
f 30//26 31//25 40//12 39//36
f 14//35 17//14 19//15 16//34
f 21//22 28//23 30//26 23//21
f 21//22 25//17 32//37 28//23
f 23//21 30//26 39//36 34//28
f 14//35 34//28 39//36 17//14
f 6//4 7//3 25//17 24//16
f 8//9 9//10 29//24 28//23
f 8//9 28//23 32//37 12//8
f 7//3 12//8 32//37 25//17
f 44//38 46//39 47//40 45//41
f 48//42 50//43 51//44 49//45
f 42//46 48//42 49//45 43//47
f 45//41 47//40 50//43 48//42
f 41//48 45//41 48//42 42//46
f 52//49 53//50 55//51 54//52
f 58//53 59//6 61//54 60//55
f 56//56 60//55 61//54 57//57
f 65//58 66//59 68//60 67//61
f 63//62 67//61 68//60 64//63
f 62//64 64//63 68//60 66//59
f 69//65 70//66 72//25 71//67
f 74//68 76//69 78//70 77//71
f 79//72 80//73 82//74 81//75
f 52//49 74//68 75//76 53//50
f 52//49 54//52 76//69 74//68
f 65//58 67//61 80//73 79//72
f 54//52 55//51 66//59 65//58
f 76//69 79//72 81//75 78//70
f 56//56 57//57 70//66 69//65
f 56//56 69//65 73//77 60//55
f 53//50 58//53 60//55 55//51
f 62//64 69//65 71//67 64//63
f 62//64 66//59 73//77 69//65
f 55//51 60//55 73//77 66//59
f 54//52 65//58 79//72 76//69
f 44//38 45//41 75//76 74//68
f 44//38 74//68 77//71 46//39
f 42//46 43//47 59//6 58//53
f 41//48 42//46 58//53 53//50
f 41//48 53//50 75//76 45//41
f 83//78 85//79 86//80 84//81
f 87//82 89//83 90//84 88//85
f 89//83 92//86 93//87 90//84
f 84//81 86//80 89//83 87//82
f 86//80 91//88 92//86 89//83
f 94//89 95//90 98//91 96//92
f 99//93 100//94 102//95 101//96
f 105//97 106//98 104//99 103//100
f 110//101 111//102 109//103 108//104
f 110//101 112//105 113//102 111//102
f 119//106 120//107 118//108 117//109
f 114//110 117//109 118//108 115//111
f 114//110 116//112 119//106 117//109
f 123//113 124//102 122//102 121//114
f 96//92 103//100 104//99 97//115
f 96//92 98//91 105//97 103//100
f 101//96 102//95 116//112 114//110
f 95//90 99//93 101//96 98//91
f 114//110 115//111 106//98 105//97
f 106//98 115//111 118//108 107//116
f 121//114 122//102 113//102 112//105
f 106//98 110//101 108//104 104//99
f 106//98 107//116 112//105 110//101
f 120//107 123//113 121//114 118//108
f 118//108 121//114 112//105 107//116
f 98//91 101//96 114//110 105//97
f 123//113 126//117 127//102 124//102
f 120//107 125//118 126//117 123//113
f 96//92 97//115 86//80 85//79
f 83//78 94//89 96//92 85//79
f 108//104 109//103 93//87 92//86
f 104//99 108//104 92//86 91//88
f 86//80 97//115 104//99 91//88
f 46//39 83//78 84//81 47//40
f 50//43 87//82 88//85 51//44
f 47//40 84//81 87//82 50//43
f 77//71 78//70 95//90 94//89
f 81//75 82//74 100//94 99//93
f 78//70 81//75 99//93 95//90
f 46//39 77//71 94//89 83//78
f 131//119 132//12 134//12 133//120
f 138//121 139//122 141//123 140//124
f 136//125 140//124 141//123 137//126
f 135//127 137//126 141//123 139//122
f 142//128 143//12 145//6 144//129
f 142//128 146//130 147//12 143//12
f 129//131 130//132 139//122 138//121
f 133//120 134//12 147//12 146//130
f 128//133 131//119 133//120 130//132
f 135//127 142//128 144//129 137//126
f 135//127 139//122 146//130 142//128
f 130//132 133//120 146//130 139//122
f 149//134 150//135 152//136 151//137
f 154//138 155//139 157//140 156//141
f 160//142 161//25 163//12 162//143
f 158//144 162//143 163//12 159//12
f 164//145 165//146 167//147 166//148
f 164//145 166//148 169//149 168//150
f 173//151 175//152 177//153 176//154
f 149//134 170//155 171//156 150//135
f 149//134 151//137 172//157 170//155
f 154//138 173//151 174//158 155//139
f 154//138 156//141 175//152 173//151
f 166//148 167//147 174//158 173//151
f 166//148 173//151 176//154 169//149
f 151//137 152//136 161//25 160//142
f 155//139 160//142 162//143 157//140
f 153//159 157//140 162//143 158//144
f 165//146 170//155 172//157 167//147
f 148//160 151//137 160//142 155//139
f 148//160 167//147 172//157 151//137
f 148//160 155//139 174//158 167//147
f 178//161 179//162 181//163 180//164
f 178//161 180//164 183//165 182//166
f 186//167 187//168 189//169 188//170
f 190//171 191//172 193//173 192//174
f 194//175 195//176 197//177 196//177
f 182//166 183//165 191//172 190//171
f 188//170 189//169 195//176 194//175
f 180//164 186//167 188//170 183//165
f 191//172 194//175 196//177 193//173
f 183//165 188//170 194//175 191//172
f 198//178 199//179 201//180 200//181
f 202//182 203//183 205//177 204//184
f 206//185 207//177 209//177 208//177
f 210//177 211//186 213//187 212//177
f 200//181 201//180 207//177 206//185
f 204//184 205//177 211//186 210//177
f 199//179 202//182 204//184 201//180
f 207//177 210//177 212//177 209//177
f 201//180 204//184 210//177 207//177
f 129//131 180//164 181//163 130//132
f 128//133 130//132 181//163 179//162
f 131//119 184//188 185//12 132//12
f 138//121 140//124 187//168 186//167
f 128//133 179//162 184//188 131//119
f 129//131 138//121 186//167 180//164
f 168//150 169//149 199//179 198//178
f 176//154 177//153 203//183 202//182
f 169//149 176//154 202//182 199//179
f 136//125 137//126 165//146 164//145
f 136//125 164//145 168//150 140//124
f 144//129 145//6 171//156 170//155
f 137//126 144//129 170//155 165//146
f 187//168 198//178 200//181 189//169
f 195//176 206//185 208//177 197//177
f 189//169 200//181 206//185 195//176
f 140//124 168//150 198//178 187//168
f 214//189 215//190 217//191 216//192
f 214//189 218//193 219//194 215//190
f 214//189 216//192 220//195 218//193
f 221//196 222//12 224//12 223//197
f 225//198 227//199 229//200 228//201
f 230//202 231//203 233//204 232//205
f 234//206 235//207 237//185 236//176
f 218//193 220//195 231//203 230//202
f 228//201 229//200 235//207 234//206
f 216//192 217//191 226//208 225//198
f 216//192 225//198 228//201 220//195
f 231//203 234//206 236//176 233//204
f 215//190 221//196 223//197 217//191
f 220//195 228//201 234//206 231//203
f 238//209 239//210 241//211 240//212
f 242//213 243//214 245//215 244//183
f 246//180 247//184 249//177 248//177
f 250//177 251//177 253//216 252//186
f 240//212 241//211 247//184 246//180
f 244//183 245//215 251//177 250//177
f 239//210 242//213 244//183 241//211
f 247//184 250//177 252//186 249//177
f 241//211 244//183 250//177 247//184
f 254//215 255//177 257//177 256//177
f 258//177 259//177 261//217 260//218
f 262//219 263//220 265//221 264//222
f 266//223 267//224 269//225 268//226
f 256//177 257//177 263//220 262//219
f 260//218 261//217 267//224 266//223
f 255//177 258//177 260//218 257//177
f 263//220 266//223 268//226 265//221
f 257//177 260//218 266//223 263//220
f 270//227 271//228 273//229 272//230
f 274//231 275//232 277//233 276//234
f 282//235 283//236 281//237 280//238
f 278//239 279//240 282//235 280//238
f 290//241 291//242 289//243 288//244
f 287//245 291//242 290//241 286//246
f 285//247 286//246 290//241 288//244
f 294//248 295//249 293//250 292//251
f 272//230 273//229 279//240 278//239
f 276//234 277//233 286//246 285//247
f 271//228 274//231 276//234 273//229
f 288//244 289//243 283//236 282//235
f 279//240 285//247 288//244 282//235
f 291//242 294//248 292//251 289//243
f 289//243 292//251 284//252 283//236
f 273//229 276//234 285//247 279//240
f 232//205 233//204 255//177 254//215
f 236//176 237//185 259//177 258//177
f 233//204 236//176 258//177 255//177
f 248//177 249//177 271//228 270//227
f 252//186 253//216 275//232 274//231
f 249//177 252//186 274//231 271//228
f 227//199 238//209 240//212 229//200
f 235//207 246//180 248//177 237//185
f 229//200 240//212 246//180 235//207
f 259//177 270//227 272//230 261//217
f 267//224 278//239 280//238 269//225
f 261//217 272//230 278//239 267//224
f 237//185 248//177 270//227 259//177
f 296//253 297//254 299//255 298//256
f 300//177 301//177 303//257 302//258
f 304//259 305//260 308//261 306//262
f 309//263 310//264 312//265 311//266
f 298//256 299//255 305//260 304//259
f 302//258 303//257 310//264 309//263
f 297//254 300//177 302//258 299//255
f 305//260 309//263 311//266 308//261
f 299//255 302//258 309//263 305//260
f 313//177 314//177 316//177 315//177
f 317//177 318//267 320//268 319//177
f 321//269 322//270 324//271 323//272
f 325//273 326//177 328//274 327//275
f 315//177 316//177 322//270 321//269
f 319//177 320//268 326//177 325//273
f 314//177 317//177 319//177 316//177
f 322//270 325//273 327//275 324//271
f 316//177 319//177 325//273 322//270
f 331//276 332//277 330//278 329//279
f 335//280 336//281 334//282 333//283
f 335//280 337//284 338//285 336//281
f 341//286 342//287 340//288 339//289
f 341//286 344//290 345//291 342//287
f 340//288 342//287 345//291 343//292
f 349//293 350//294 348//295 347//296
f 339//289 340//288 332//277 331//276
f 347//296 348//295 338//285 337//284
f 335//280 346//297 347//296 337//284
f 332//277 335//280 333//283 330//278
f 345//291 349//293 347//296 343//292
f 340//288 343//292 347//296 346//297
f 340//288 346//297 335//280 332//277
f 355//298 356//299 354//300 353//301
f 351//302 352//303 355//298 353//301
f 359//304 360//305 362//306 361//307
f 368//308 369//102 367//102 366//309
f 372//310 373//311 371//312 370//313
f 372//310 375//314 376//315 373//311
f 371//312 373//311 376//315 374//316
f 381//317 382//318 380//102 379//319
f 377//320 379//319 380//102 378//102
f 355//298 364//321 365//322 356//299
f 354//300 356//299 365//322 363//323
f 357//324 366//309 367//102 358//102
f 361//307 362//306 372//310 370//313
f 352//303 359//304 361//307 355//298
f 370//313 371//312 365//322 364//321
f 377//320 378//102 369//102 368//308
f 365//322 368//308 366//309 363//323
f 376//315 381//317 379//319 374//316
f 371//312 374//316 379//319 377//320
f 371//312 377//320 368//308 365//322
f 354//300 363//323 366//309 357//324
f 355//298 361//307 370//313 364//321
f 306//262 329//279 330//278 307//325
f 306//262 308//261 331//276 329//279
f 311//266 312//265 341//286 339//289
f 308//261 311//266 339//289 331//276
f 323//272 324//271 352//303 351//302
f 327//275 328//274 360//305 359//304
f 324//271 327//275 359//304 352//303
f 301//177 313//177 315//177 303//257
f 310//264 321//269 323//272 312//265
f 303//257 315//177 321//269 310//264
f 353//301 354//300 345//291 344//290
f 341//286 351//302 353//301 344//290
f 357//324 358//102 350//294 349//293
f 354//300 357//324 349//293 345//291
f 312//265 323//272 351//302 341//286
f 383//326 384//327 386//328 385//329
f 387//330 388//331 390//332 389//333
f 391//177 392//334 394//177 393//335
f 395//336 396//337 398//177 397//177
f 385//329 386//328 392//334 391//177
f 389//333 390//332 396//337 395//336
f 384//327 387//330 389//333 386//328
f 392//334 395//336 397//177 394//177
f 386//328 389//333 395//336 392//334
f 399//338 400//339 402//340 401//341
f 399//338 401//341 404//342 403//343
f 409//344 410//345 412//346 411//347
f 407//348 410//345 409//344 406//349
f 407//348 408//350 412//346 410//345
f 413//351 414//352 416//353 415//354
f 417//355 418//356 420//357 419//358
f 421//359 422//360 424//361 423//362
f 403//343 404//342 418//356 417//355
f 409//344 411//347 422//360 421//359
f 401//341 402//340 407//348 406//349
f 401//341 406//349 409//344 404//342
f 418//356 421//359 423//362 420//357
f 407//348 413//351 415//354 408//350
f 402//340 405//363 413//351 407//348
f 404//342 409//344 421//359 418//356
f 425//364 426//365 428//366 427//367
f 429//368 430//177 432//369 431//370
f 437//371 438//372 436//373 435//374
f 433//375 434//376 437//371 435//374
f 442//377 443//378 446//379 444//380
f 427//367 428//366 434//376 433//375
f 431//370 432//369 443//378 442//377
f 426//365 429//368 431//370 428//366
f 444//380 445//381 438//372 437//371
f 434//376 442//377 444//380 437//371
f 438//372 441//382 439//383 436//373
f 428//366 431//370 442//377 434//376
f 447//177 448//177 450//384 449//385
f 451//386 452//387 454//177 453//177
f 455//388 456//389 458//390 457//391
f 459//392 460//393 462//394 461//395
f 449//385 450//384 456//389 455//388
f 453//177 454//177 460//393 459//392
f 448//177 451//386 453//177 450//384
f 456//389 459//392 461//395 458//390
f 450//384 453//177 459//392 456//389
f 393//335 394//177 426//365 425//364
f 397//177 398//177 430//177 429//368
f 394//177 397//177 429//368 426//365
f 419//358 420//357 448//177 447//177
f 423//362 424//361 452//387 451//386
f 420//357 423//362 451//386 448//177
f 388//331 399//338 403//343 390//332
f 396//337 417//355 419//358 398//177
f 390//332 403//343 417//355 396//337
f 430//177 447//177 449//385 432//369
f 443//378 455//388 457//391 446//379
f 432//369 449//385 455//388 443//378
f 398//177 419//358 447//177 430//177
f 192//174 193//173 297//254 296//253
f 196//177 197//177 301//177 300//177
f 193//173 196//177 300//177 297//254
f 208//177 209//177 314//177 313//177
f 212//177 213//187 318//267 317//177
f 209//177 212//177 317//177 314//177
f 197//177 208//177 313//177 301//177
f 264//222 265//221 384//327 383//326
f 268//226 269//225 388//331 387//330
f 265//221 268//226 387//330 384//327
f 281//237 400//339 399//338 280//238
f 281//237 283//236 402//340 400//339
f 293//250 414//352 413//351 292//251
f 284//252 405//363 402//340 283//236
f 284//252 292//251 413//351 405//363
f 269//225 280//238 399//338 388//331
f 156//141 157//140 219//194 218//193
f 153//159 215//190 219//194 157//140
f 175//152 230//202 232//205 177//153
f 158//144 159//12 222//12 221//196
f 153//159 158//144 221//196 215//190
f 156//141 218//193 230//202 175//152
f 203//183 254//215 256//177 205//177
f 211//186 262//219 264//222 213//187
f 205//177 256//177 262//219 211//186
f 177//153 232//205 254//215 203//183
f 318//267 383//326 385//329 320//268
f 326//177 391//177 393//335 328//274
f 320//268 385//329 391//177 326//177
f 360//305 425//364 427//367 362//306
f 435//374 436//373 376//315 375//314
f 372//310 433//375 435//374 375//314
f 439//383 440//396 382//318 381//317
f 436//373 439//383 381//317 376//315
f 362//306 427//367 433//375 372//310
f 328//274 393//335 425//364 360//305
f 213//187 264//222 383//326 318//267
f 2//11 223//197 224//12 3//12
f 4//1 225//198 226//208 5//2
f 4//1 6//4 227//199 225//198
f 1//13 217//191 223//197 2//11
f 1//13 5//2 226//208 217//191
f 24//16 26//19 239//210 238//209
f 37//32 38//31 243//214 242//213
f 26//19 37//32 242//213 239//210
f 6//4 24//16 238//209 227//199
f 63//62 64//63 179//162 178//161
f 63//62 178//161 182//166 67//61
f 80//73 190//171 192//174 82//74
f 71//67 72//25 185//12 184//188
f 64//63 71//67 184//188 179//162
f 67//61 182//166 190//171 80//73
f 100//94 296//253 298//256 102//95
f 306//262 307//325 120//107 119//106
f 116//112 304//259 306//262 119//106
f 102//95 298//256 304//259 116//112
f 333//283 334//282 127//102 126//117
f 330//278 333//283 126//117 125//118
f 120//107 307//325 330//278 125//118
f 82//74 192//174 296//253 100//94
f 466//397 467//398 465//399 464//400
f 470//401 471//402 469//403 468//404
f 475//405 476//102 474//406 473//407
f 475//405 477//408 478//102 476//102
f 473//407 474//406 467//398 466//397
f 471//402 475//405 473//407 469//403
f 471//402 472//409 477//408 475//405
f 469//403 473//407 466//397 463//410
f 484//411 485//412 483//413 482//414
f 479//415 482//414 483//413 480//416
f 479//415 481//417 484//411 482//414
f 488//418 489//419 487//102 486//420
f 494//421 495//422 493//423 492//424
f 490//425 491//426 494//421 492//424
f 504//427 505//102 503//102 502//428
f 488//418 497//429 498//419 489//419
f 494//421 500//430 501//431 495//422
f 493//423 495//422 501//431 499//432
f 492//424 493//423 485//412 484//411
f 481//417 490//425 492//424 484//411
f 502//428 503//102 498//419 497//429
f 485//412 488//418 486//420 483//413
f 501//431 504//427 502//428 499//432
f 499//432 502//428 497//429 496//433
f 485//412 496//433 497//429 488//418
f 485//412 493//423 499//432 496//433
f 479//415 480//416 471//402 470//401
f 471//402 480//416 483//413 472//409
f 486//420 487//102 478//102 477//408
f 483//413 486//420 477//408 472//409
f 439//383 464//400 465//399 440//396
f 439//383 441//382 466//397 464//400
f 444//380 468//404 469//403 445//381
f 444//380 446//379 470//401 468//404
f 438//372 463//410 466//397 441//382
f 438//372 445//381 469//403 463//410
f 457//391 458//390 481//417 479//415
f 461//395 462//394 491//426 490//425
f 458//390 461//395 490//425 481//417
f 446//379 457//391 479//415 470//401
f 511//434 512//435 514//436 513//437
f 509//438 513//437 514//436 510//439
f 515//440 516//441 518//442 517//443
f 506//444 507//445 512//435 511//434
f 512//435 515//440 517//443 514//436
f 507//445 508//446 515//440 512//435
f 519//444 520//447 522//448 521//444
f 526//449 527//450 529//451 528//452
f 534//453 535//454 537//455 536//456
f 532//457 536//456 537//455 533//458
f 534//453 536//456 532//457 531//459
f 540//460 541//461 543//462 542//463
f 544//464 545//465 543//462 541//461
f 519//444 538//444 539//466 520//447
f 524//467 542//463 543//462 525//468
f 540//460 542//463 524//467 523//469
f 528//452 529//451 539//466 538//444
f 532//457 533//458 541//461 540//460
f 537//455 544//464 541//461 533//458
f 520//447 523//469 524//467 522//448
f 527//450 531//459 532//457 529//451
f 527//450 530//470 534//453 531//459
f 529//451 532//457 540//460 539//466
f 520//447 539//466 540//460 523//469
f 509//438 510//439 527//450 526//449
f 514//436 530//470 527//450 510//439
f 517//443 518//442 535//454 534//453
f 514//436 517//443 534//453 530//470
f 549//471 551//472 552//473 550//474
f 553//475 555//476 556//477 554//478
f 546//479 549//471 550//474 547//480
f 550//474 552//473 555//476 553//475
f 547//480 550//474 553//475 548//481
f 559//434 560//482 562//483 561//484
f 557//485 561//484 562//483 558//486
f 563//487 564//488 566//489 565//490
f 567//491 568//492 570//493 569//452
f 575//494 576//495 578//496 577//497
f 573//498 577//497 578//496 574//499
f 575//494 577//497 573//498 572//500
f 582//501 583//502 581//503 580//504
f 586//505 587//506 585//507 584//508
f 563//487 579//509 580//504 564//488
f 580//504 581//503 566//489 564//488
f 584//508 585//507 578//496 576//495
f 557//485 558//486 568//492 567//491
f 562//483 571//510 568//492 558//486
f 565//490 566//489 576//495 575//494
f 583//502 586//505 584//508 581//503
f 560//482 563//487 565//490 562//483
f 568//492 572//500 573//498 570//493
f 568//492 571//510 575//494 572//500
f 562//483 565//490 575//494 571//510
f 581//503 584//508 576//495 566//489
f 546//479 547//480 560//482 559//434
f 553//475 554//478 580//504 579//509
f 556//477 582//501 580//504 554//478
f 547//480 548//481 563//487 560//482
f 553//475 579//509 563//487 548//481
f 588//511 590//512 591//513 589//514
f 592//515 594//516 595//517 593//518
f 590//512 596//519 597//520 591//513
f 589//514 591//513 594//516 592//515
f 591//513 597//520 598//521 594//516
f 602//522 603//523 600//524 599//525
f 606//526 607//527 605//528 604//529
f 610//530 611//531 609//532 608//533
f 610//530 612//530 613//534 611//531
f 616//535 617//536 615//537 614//538
f 621//530 622//539 620//540 619//530
f 628//541 629//542 627//543 626//544
f 623//545 626//544 627//543 624//546
f 627//543 629//542 625//547 624//546
f 601//548 614//538 615//537 602//522
f 615//537 617//536 603//523 602//522
f 624//546 625//547 607//527 606//526
f 619//530 620//540 613//534 612//530
f 603//523 606//526 604//529 600//524
f 623//545 624//546 617//536 616//535
f 618//549 626//544 623//545 616//535
f 611//531 616//535 614//538 609//532
f 611//531 613//534 618//549 616//535
f 622//539 628//541 626//544 620//540
f 620//540 626//544 618//549 613//534
f 617//536 624//546 606//526 603//523
f 621//530 630//550 631//551 622//539
f 622//539 631//551 632//552 628//541
f 608//533 609//532 597//520 596//519
f 601//548 602//522 595//517 594//516
f 595//517 602//522 599//525 593//518
f 609//532 614//538 598//521 597//520
f 598//521 614//538 601//548 594//516
f 551//472 588//511 589//514 552//473
f 555//476 592//515 593//518 556//477
f 552//473 589//514 592//515 555//476
f 599//525 600//524 583//502 582//501
f 604//529 605//528 587//506 586//505
f 600//524 604//529 586//505 583//502
f 593//518 599//525 582//501 556//477
f 633//444 634//553 636//554 635//444
f 640//444 641//555 643//556 642//434
f 640//444 644//444 645//557 641//555
f 649//558 650//559 652//560 651//561
f 647//562 651//561 652//560 648//563
f 649//558 651//561 647//562 646//564
f 635//444 636//554 645//557 644//444
f 638//565 639//566 650//559 649//558
f 634//553 637//567 638//565 636//554
f 641//555 646//564 647//562 643//556
f 641//555 645//557 649//558 646//564
f 636//554 638//565 649//558 645//557
f 653//568 654//569 656//570 655//571
f 660//452 661//572 663//573 662//444
f 658//444 662//444 663//573 659//574
f 665//575 666//576 668//577 667//578
f 672//579 673//580 675//581 674//582
f 676//583 677//584 675//581 673//580
f 681//585 682//586 680//587 679//588
f 653//568 669//589 670//590 654//569
f 670//590 671//591 656//570 654//569
f 665//575 678//592 679//588 666//576
f 679//588 680//587 668//577 666//576
f 655//571 656//570 661//572 660//452
f 674//582 675//581 679//588 678//592
f 677//584 681//585 679//588 675//581
f 661//572 665//575 667//578 663//573
f 659//574 663//573 667//578 664//593
f 670//590 672//579 674//582 671//591
f 656//570 657//594 665//575 661//572
f 656//570 671//591 674//582 657//594
f 674//582 678//592 665//575 657//594
f 685//595 686//596 688//597 687//598
f 689//599 690//600 688//597 686//596
f 693//601 694//602 692//603 691//604
f 697//605 698//606 696//607 695//608
f 701//609 702//609 700//610 699//611
f 695//608 696//607 690//600 689//599
f 699//611 700//610 694//602 693//601
f 690//600 693//601 691//604 688//597
f 698//606 701//609 699//611 696//607
f 696//607 699//611 693//601 690//600
f 705//612 706//613 704//614 703//615
f 709//616 710//609 708//617 707//618
f 713//609 714//609 712//609 711//619
f 717//609 718//620 716//621 715//609
f 711//619 712//609 706//613 705//612
f 715//609 716//621 710//609 709//616
f 706//613 709//616 707//618 704//614
f 714//609 717//609 715//609 712//609
f 712//609 715//609 709//616 706//613
f 633//444 683//444 684//622 634//553
f 638//565 687//598 688//597 639//566
f 685//595 687//598 638//565 637//567
f 691//604 692//603 652//560 650//559
f 634//553 684//622 685//595 637//567
f 688//597 691//604 650//559 639//566
f 703//615 704//614 677//584 676//583
f 707//618 708//617 682//586 681//585
f 704//614 707//618 681//585 677//584
f 642//434 643//556 670//590 669//589
f 647//562 648//563 673//580 672//579
f 652//560 676//583 673//580 648//563
f 643//556 647//562 672//579 670//590
f 694//602 705//612 703//615 692//603
f 702//609 713//609 711//619 700//610
f 700//610 711//619 705//612 694//602
f 692//603 703//615 676//583 652//560
f 719//444 720//623 722//624 721//444
f 723//625 724//626 726//627 725//628
f 723//625 727//629 728//630 724//626
f 728//630 729//631 726//627 724//626
f 733//632 734//633 732//634 731//635
f 737//636 738//637 736//638 735//639
f 741//610 742//619 740//640 739//641
f 735//639 736//638 729//631 728//630
f 739//641 740//640 734//633 733//632
f 725//628 726//627 731//635 730//642
f 729//631 733//632 731//635 726//627
f 738//637 741//610 739//641 736//638
f 720//623 723//625 725//628 722//624
f 736//638 739//641 733//632 729//631
f 745//643 746//644 744//645 743//646
f 749//617 750//647 748//648 747//649
f 753//609 754//609 752//616 751//613
f 757//621 758//650 756//609 755//609
f 751//613 752//616 746//644 745//643
f 755//609 756//609 750//647 749//617
f 746//644 749//617 747//649 744//645
f 754//609 757//621 755//609 752//616
f 752//616 755//609 749//617 746//644
f 761//609 762//609 760//609 759//647
f 765//651 766//652 764//609 763//609
f 769//653 770//654 768//655 767//656
f 773//657 774//658 772//659 771//660
f 767//656 768//655 762//609 761//609
f 771//660 772//659 766//652 765//651
f 762//609 765//651 763//609 760//609
f 770//654 773//657 771//660 768//655
f 768//655 771//660 765//651 762//609
f 777//661 778//662 776//663 775//664
f 781//665 782//666 780//667 779//668
f 788//669 789//670 787//671 786//672
f 787//671 789//670 785//673 784//674
f 792//675 793//676 791//677 790//678
f 799//679 800//680 798//681 797//682
f 796//683 800//680 799//679 795//684
f 798//681 800//680 796//683 794//685
f 784//674 785//673 778//662 777//661
f 794//685 796//683 782//666 781//665
f 778//662 781//665 779//668 776//663
f 797//682 798//681 789//670 788//669
f 789//670 798//681 794//685 785//673
f 793//676 799//679 797//682 791//677
f 791//677 797//682 788//669 783//686
f 785//673 794//685 781//665 778//662
f 759//647 760//609 738//637 737//636
f 763//609 764//609 742//619 741//610
f 760//609 763//609 741//610 738//637
f 775//664 776//663 754//609 753//609
f 779//668 780//667 758//650 757//621
f 776//663 779//668 757//621 754//609
f 734//633 745//643 743//646 732//634
f 742//619 753//609 751//613 740//640
f 740//640 751//613 745//643 734//633
f 766//652 777//661 775//664 764//609
f 774//658 787//671 784//674 772//659
f 772//659 784//674 777//661 766//652
f 764//609 775//664 753//609 742//619
f 803//687 804//688 802//689 801//690
f 807//691 808//692 806//609 805//609
f 812//693 813//694 810//695 809//696
f 816//697 817//698 815//699 814//700
f 809//696 810//695 804//688 803//687
f 814//700 815//699 808//692 807//691
f 804//688 807//691 805//609 802//689
f 813//694 816//697 814//700 810//695
f 810//695 814//700 807//691 804//688
f 820//609 821//609 819//609 818//609
f 824//609 825//701 823//702 822//609
f 828//703 829//704 827//705 826//706
f 832//707 833//708 831//609 830//709
f 826//706 827//705 821//609 820//609
f 830//709 831//609 825//701 824//609
f 821//609 824//609 822//609 819//609
f 829//704 832//707 830//709 827//705
f 827//705 830//709 824//609 821//609
f 836//710 837//711 835//712 834//713
f 836//710 838//714 839//715 837//711
f 842//716 843//717 841//718 840//719
f 847//720 848//721 846//722 845//723
f 851//724 852//725 850//726 849//727
f 851//724 854//728 855//729 852//725
f 853//730 854//728 851//724 849//727
f 845//723 846//722 839//715 838//714
f 839//715 846//722 844//731 837//711
f 849//727 850//726 843//717 842//716
f 837//711 842//716 840//719 835//712
f 848//721 854//728 853//730 846//722
f 844//731 846//722 853//730 849//727
f 844//731 849//727 842//716 837//711
f 862//732 863//733 861//734 860//735
f 861//734 863//733 859//736 858//737
f 866//738 867//739 865//740 864//741
f 870//530 871//742 869//743 868//530
f 879//744 880//745 878//746 877//530
f 875//530 877//530 878//746 876//747
f 883//748 884//749 882//750 881//751
f 883//748 886//752 887//753 884//749
f 885//754 886//752 883//748 881//751
f 856//530 868//530 869//743 857//755
f 862//732 873//756 874//757 863//733
f 872//758 873//756 862//732 860//735
f 882//750 884//749 867//739 866//738
f 875//530 876//747 871//742 870//530
f 863//733 866//738 864//741 859//736
f 881//751 882//750 874//757 873//756
f 871//742 873//756 872//758 869//743
f 880//745 886//752 885//754 878//746
f 876//747 878//746 885//754 881//751
f 876//747 881//751 873//756 871//742
f 857//755 869//743 872//758 860//735
f 874//757 882//750 866//738 863//733
f 811//759 840//719 841//718 812//693
f 841//718 843//717 813//694 812//693
f 850//726 852//725 817//698 816//697
f 843//717 850//726 816//697 813//694
f 858//737 859//736 829//704 828//703
f 864//741 865//740 833//708 832//707
f 859//736 864//741 832//707 829//704
f 808//692 820//609 818//609 806//609
f 817//698 828//703 826//706 815//699
f 815//699 826//706 820//609 808//692
f 856//530 857//755 848//721 847//720
f 860//735 861//734 855//729 854//728
f 855//729 861//734 858//737 852//725
f 857//755 860//735 854//728 848//721
f 852//725 858//737 828//703 817//698
f 890//760 891//761 889//762 888//763
f 894//764 895//765 893//766 892//767
f 898//768 899//609 897//769 896//609
f 902//609 903//609 901//770 900//771
f 896//609 897//769 891//761 890//760
f 900//771 901//770 895//765 894//764
f 891//761 894//764 892//767 889//762
f 899//609 902//609 900//771 897//769
f 897//769 900//771 894//764 891//761
f 905//772 906//773 908//774 907//775
f 909//776 910//777 908//774 906//773
f 911//778 912//779 914//780 913//781
f 918//782 919//783 921//784 920//785
f 916//786 919//783 918//782 915//787
f 918//782 920//785 917//788 915//787
f 924//789 925//790 923//791 922//792
f 928//793 929//794 927//795 926//796
f 922//792 923//791 910//777 909//776
f 926//796 927//795 921//784 919//783
f 907//775 908//774 916//786 915//787
f 910//777 919//783 916//786 908//774
f 925//790 928//793 926//796 923//791
f 912//779 915//787 917//788 914//780
f 904//797 907//775 915//787 912//779
f 923//791 926//796 919//783 910//777
f 932//798 933//799 931//800 930//801
f 936//802 937//803 935//609 934//804
f 945//805 946//806 944//807 943//808
f 944//807 946//806 942//809 941//810
f 950//811 951//812 948//813 947//814
f 941//810 942//809 933//799 932//798
f 947//814 948//813 937//803 936//802
f 933//799 936//802 934//804 931//800
f 949//815 950//811 946//806 945//805
f 946//806 950//811 947//814 942//809
f 940//816 945//805 943//808 939//817
f 942//809 947//814 936//802 933//799
f 954//818 955//819 953//609 952//609
f 958//609 959//609 957//820 956//821
f 962//822 963//823 961//824 960//825
f 966//826 967//827 965//828 964//829
f 960//825 961//824 955//819 954//818
f 964//829 965//828 959//609 958//609
f 955//819 958//609 956//821 953//609
f 963//823 966//826 964//829 961//824
f 961//824 964//829 958//609 955//819
f 930//801 931//800 899//609 898//768
f 934//804 935//609 903//609 902//609
f 931//800 934//804 902//609 899//609
f 952//609 953//609 925//790 924//789
f 956//821 957//820 929//794 928//793
f 953//609 956//821 928//793 925//790
f 895//765 909//776 906//773 893//766
f 903//609 924//789 922//792 901//770
f 901//770 922//792 909//776 895//765
f 937//803 954//818 952//609 935//609
f 951//812 962//822 960//825 948//813
f 948//813 960//825 954//818 937//803
f 935//609 952//609 924//789 903//609
f 801//690 802//689 698//606 697//605
f 805//609 806//609 702//609 701//609
f 802//689 805//609 701//609 698//606
f 818//609 819//609 714//609 713//609
f 822//609 823//702 718//620 717//609
f 819//609 822//609 717//609 714//609
f 806//609 818//609 713//609 702//609
f 888//763 889//762 770//654 769//653
f 892//767 893//766 774//658 773//657
f 889//762 892//767 773//657 770//654
f 787//671 906//773 905//772 786//672
f 905//772 907//775 788//669 786//672
f 791//677 912//779 911//778 790//678
f 788//669 907//775 904//797 783//686
f 904//797 912//779 791//677 783//686
f 893//766 906//773 787//671 774//658
f 658//444 659//574 720//623 719//444
f 667//578 668//577 728//630 727//629
f 667//578 727//629 723//625 664//593
f 682//586 737//636 735//639 680//587
f 659//574 664//593 723//625 720//623
f 680//587 735//639 728//630 668//577
f 710//609 761//609 759//647 708//617
f 718//620 769//653 767//656 716//621
f 716//621 767//656 761//609 710//609
f 708//617 759//647 737//636 682//586
f 825//701 890//760 888//763 823//702
f 833//708 898//768 896//609 831//609
f 831//609 896//609 890//760 825//701
f 938//830 939//817 880//745 879//744
f 867//739 932//798 930//801 865//740
f 943//808 944//807 887//753 886//752
f 887//753 944//807 941//810 884//749
f 939//817 943//808 886//752 880//745
f 884//749 941//810 932//798 867//739
f 865//740 930//801 898//768 833//708
f 823//702 888//763 769//653 718//620
f 506//444 721//444 722//624 507//445
f 515//440 730//642 731//635 516//441
f 731//635 732//634 518//442 516//441
f 507//445 722//624 725//628 508//446
f 725//628 730//642 515//440 508//446
f 743//646 744//645 537//455 535//454
f 747//649 748//648 545//465 544//464
f 744//645 747//649 544//464 537//455
f 732//634 743//646 535//454 518//442
f 569//452 570//493 684//622 683//444
f 573//498 574//499 686//596 685//595
f 578//496 689//599 686//596 574//499
f 587//506 697//605 695//608 585//507
f 570//493 573//498 685//595 684//622
f 585//507 695//608 689//599 578//496
f 607//527 803//687 801//690 605//528
f 811//759 812//693 629//542 628//541
f 629//542 812//693 809//696 625//547
f 625//547 809//696 803//687 607//527
f 834//713 835//712 631//551 630//550
f 835//712 840//719 632//552 631//551
f 632//552 840//719 811//759 628//541
f 605//528 801//690 697//605 587//506
f 970//831 971//832 969//833 968//834
f 975//530 976//835 974//836 973//837
f 975//530 977//530 978//838 976//835
f 981//839 982//840 980//841 979//842
f 973//837 974//836 971//832 970//831
f 976//835 981//839 979//842 974//836
f 976//835 978//838 983//843 981//839
f 974//836 979//842 972//844 971//832
f 986//530 987//845 985//846 984//530
f 993//847 994//848 992//849 991//850
f 988//851 991//850 992//849 989//852
f 992//849 994//848 990//853 989//852
f 999//854 1000//855 998//856 997//857
f 998//856 1000//855 996//858 995//859
f 1006//530 1007//860 1005//861 1004//530
f 986//530 1001//530 1002//862 987//845
f 999//854 1009//863 1010//864 1000//855
f 1008//865 1009//863 999//854 997//857
f 1004//530 1005//861 1002//862 1001//530
f 997//857 998//856 994//848 993//847
f 994//848 998//856 995//859 990//853
f 987//845 993//847 991//850 985//846
f 1007//860 1009//863 1008//865 1005//861
f 1005//861 1008//865 1003//866 1002//862
f 987//845 1002//862 1003//866 993//847
f 1003//866 1008//865 997//857 993//847
f 984//530 985//846 978//838 977//530
f 988//851 989//852 982//840 981//839
f 983//843 991//850 988//851 981//839
f 985//846 991//850 983//843 978//838
f 938//830 968//834 969//833 939//817
f 969//833 971//832 940//816 939//817
f 949//815 979//842 980//841 950//811
f 980//841 982//840 951//812 950//811
f 940//816 971//832 972//844 945//805
f 972//844 979//842 949//815 945//805
f 989//852 990//853 963//823 962//822
f 995//859 996//858 967//827 966//826
f 990//853 995//859 966//826 963//823
f 982//840 989//852 962//822 951//812
f 1014//867 1015//12 1017//12 1016//868
f 1021//869 1022//870 1024//871 1023//872
f 1019//873 1023//872 1024//871 1020//874
f 1018//875 1020//874 1024//871 1022//870
f 1025//876 1026//12 1028//877 1027//878
f 1025//876 1029//879 1030//12 1026//12
f 1012//880 1013//881 1022//870 1021//869
f 1016//868 1017//12 1030//12 1029//879
f 1011//882 1014//867 1016//868 1013//881
f 1018//875 1025//876 1027//878 1020//874
f 1018//875 1022//870 1029//879 1025//876
f 1013//881 1016//868 1029//879 1022//870
f 1032//883 1033//884 1035//885 1034//886
f 1040//887 1041//888 1043//889 1042//890
f 1046//891 1047//892 1049//12 1048//893
f 1044//894 1048//893 1049//12 1045//12
f 1050//895 1051//896 1053//897 1052//898
f 1050//895 1054//899 1055//900 1051//896
f 1050//895 1052//898 1056//901 1054//899
f 1057//15 1058//12 1060//12 1059//902
f 1037//903 1059//902 1060//12 1038//12
f 1042//890 1043//889 1055//900 1054//899
f 1039//904 1051//896 1055//900 1043//889
f 1044//894 1045//12 1058//12 1057//15
f 1041//888 1046//891 1048//893 1043//889
f 1039//904 1043//889 1048//893 1044//894
f 1051//896 1057//15 1059//902 1053//897
f 1039//904 1044//894 1057//15 1051//896
f 1036//905 1053//897 1059//902 1037//903
f 1064//906 1065//907 1067//908 1066//909
f 1062//910 1066//909 1067//908 1063//911
f 1061//912 1063//911 1067//908 1065//907
f 1068//913 1069//12 1071//914 1070//915
f 1068//913 1072//916 1073//12 1069//12
f 1074//917 1075//918 1077//919 1076//920
f 1074//917 1076//920 1079//921 1078//922
f 1083//923 1084//924 1086//925 1085//926
f 1087//927 1088//928 1090//929 1089//930
f 1064//906 1066//909 1084//924 1083//923
f 1078//922 1079//921 1088//928 1087//927
f 1062//910 1063//911 1075//918 1074//917
f 1062//910 1074//917 1078//922 1066//909
f 1084//924 1087//927 1089//930 1086//925
f 1070//915 1071//914 1081//931 1080//932
f 1061//912 1068//913 1070//915 1063//911
f 1061//912 1065//907 1072//916 1068//913
f 1075//918 1080//932 1082//933 1077//919
f 1063//911 1070//915 1080//932 1075//918
f 1066//909 1078//922 1087//927 1084//924
f 1091//934 1093//935 1095//936 1094//937
f 1096//938 1097//939 1099//940 1098//941
f 1100//942 1101//183 1103//177 1102//184
f 1104//215 1105//177 1107//177 1106//177
f 1094//937 1095//936 1101//183 1100//942
f 1098//941 1099//940 1105//177 1104//215
f 1093//935 1096//938 1098//941 1095//936
f 1101//183 1104//215 1106//177 1103//177
f 1095//936 1098//941 1104//215 1101//183
f 1032//883 1080//932 1081//931 1033//884
f 1032//883 1034//886 1082//933 1080//932
f 1031//943 1077//919 1082//933 1034//886
f 1040//887 1091//934 1092//944 1041//888
f 1040//887 1042//890 1093//935 1091//934
f 1054//899 1056//901 1097//939 1096//938
f 1042//890 1054//899 1096//938 1093//935
f 1034//886 1035//885 1047//892 1046//891
f 1031//943 1034//886 1046//891 1041//888
f 1076//920 1077//919 1092//944 1091//934
f 1076//920 1091//934 1094//937 1079//921
f 1088//928 1100//942 1102//184 1090//929
f 1079//921 1094//937 1100//942 1088//928
f 1031//943 1041//888 1092//944 1077//919
f 1108//945 1109//946 1111//947 1110//948
f 1114//949 1115//877 1117//950 1116//951
f 1112//952 1116//951 1117//950 1113//953
f 1121//954 1122//955 1124//956 1123//957
f 1119//958 1123//957 1124//956 1120//959
f 1118//960 1120//959 1124//956 1122//955
f 1125//961 1126//962 1128//892 1127//963
f 1130//964 1132//965 1134//966 1133//967
f 1135//968 1136//969 1138//970 1137//971
f 1108//945 1130//964 1131//972 1109//946
f 1108//945 1110//948 1132//965 1130//964
f 1121//954 1123//957 1136//969 1135//968
f 1110//948 1111//947 1122//955 1121//954
f 1132//965 1135//968 1137//971 1134//966
f 1112//952 1113//953 1126//962 1125//961
f 1112//952 1125//961 1129//973 1116//951
f 1109//946 1114//949 1116//951 1111//947
f 1118//960 1125//961 1127//963 1120//959
f 1118//960 1122//955 1129//973 1125//961
f 1111//947 1116//951 1129//973 1122//955
f 1110//948 1121//954 1135//968 1132//965
f 1139//974 1140//975 1142//976 1141//977
f 1139//974 1141//977 1144//978 1143//979
f 1147//980 1148//981 1150//982 1149//983
f 1151//984 1152//985 1154//215 1153//986
f 1155//987 1156//988 1158//177 1157//177
f 1143//979 1144//978 1152//985 1151//984
f 1149//983 1150//982 1156//988 1155//987
f 1141//977 1147//980 1149//983 1144//978
f 1152//985 1155//987 1157//177 1154//215
f 1144//978 1149//983 1155//987 1152//985
f 1159//989 1160//990 1162//185 1161//988
f 1163//929 1164//184 1166//177 1165//177
f 1167//177 1168//177 1170//991 1169//218
f 1171//227 1172//992 1174//993 1173//994
f 1161//988 1162//185 1168//177 1167//177
f 1165//177 1166//177 1172//992 1171//227
f 1160//990 1163//929 1165//177 1162//185
f 1168//177 1171//227 1173//994 1170//991
f 1162//185 1165//177 1171//227 1168//177
f 1175//177 1176//177 1178//995 1177//996
f 1179//177 1180//218 1182//997 1181//998
f 1183//999 1184//1000 1186//1001 1185//1002
f 1187//1003 1188//1004 1190//1005 1189//1006
f 1177//996 1178//995 1184//1000 1183//999
f 1181//998 1182//997 1188//1004 1187//1003
f 1176//177 1179//177 1181//998 1178//995
f 1184//1000 1187//1003 1189//1006 1186//1001
f 1178//995 1181//998 1187//1003 1184//1000
f 1133//967 1134//966 1160//990 1159//989
f 1137//971 1138//970 1164//184 1163//929
f 1134//966 1137//971 1163//929 1160//990
f 1153//986 1154//215 1176//177 1175//177
f 1157//177 1158//177 1180//218 1179//177
f 1154//215 1157//177 1179//177 1176//177
f 1119//958 1120//959 1140//975 1139//974
f 1119//958 1139//974 1143//979 1123//957
f 1136//969 1151//984 1153//986 1138//970
f 1127//963 1128//892 1146//12 1145//1007
f 1120//959 1127//963 1145//1007 1140//975
f 1123//957 1143//979 1151//984 1136//969
f 1164//184 1175//177 1177//996 1166//177
f 1172//992 1183//999 1185//1002 1174//993
f 1166//177 1177//996 1183//999 1172//992
f 1138//970 1153//986 1175//177 1164//184
f 1012//880 1141//977 1142//976 1013//881
f 1011//882 1013//881 1142//976 1140//975
f 1014//867 1145//1007 1146//12 1015//12
f 1021//869 1023//872 1148//981 1147//980
f 1011//882 1140//975 1145//1007 1014//867
f 1012//880 1021//869 1147//980 1141//977
f 1052//898 1053//897 1131//972 1130//964
f 1052//898 1130//964 1133//967 1056//901
f 1037//903 1038//12 1115//877 1114//949
f 1036//905 1037//903 1114//949 1109//946
f 1036//905 1109//946 1131//972 1053//897
f 1097//939 1159//989 1161//988 1099//940
f 1105//177 1167//177 1169//218 1107//177
f 1099//940 1161//988 1167//177 1105//177
f 1056//901 1133//967 1159//989 1097//939
f 1193//1008 1194//1009 1196//1010 1195//1011
f 1198//1012 1199//1013 1201//1014 1200//1015
f 1204//1016 1205//1017 1207//12 1206//1018
f 1202//1019 1206//1018 1207//12 1203//1020
f 1208//1021 1209//1022 1211//1023 1210//1024
f 1208//1021 1210//1024 1213//1025 1212//1026
f 1217//1027 1219//1028 1221//1029 1220//1030
f 1193//1008 1214//1031 1215//1032 1194//1009
f 1193//1008 1195//1011 1216//1033 1214//1031
f 1198//1012 1217//1027 1218//1034 1199//1013
f 1198//1012 1200//1015 1219//1028 1217//1027
f 1210//1024 1211//1023 1218//1034 1217//1027
f 1210//1024 1217//1027 1220//1030 1213//1025
f 1195//1011 1196//1010 1205//1017 1204//1016
f 1199//1013 1204//1016 1206//1018 1201//1014
f 1197//1035 1201//1014 1206//1018 1202//1019
f 1209//1022 1214//1031 1216//1033 1211//1023
f 1192//1036 1195//1011 1204//1016 1199//1013
f 1192//1036 1211//1023 1216//1033 1195//1011
f 1192//1036 1199//1013 1218//1034 1211//1023
f 1226//1037 1228//1038 1227//1039 1225//1040
f 1230//1041 1232//1042 1231//1043 1229//1044
f 1234//1045 1236//1045 1235//1046 1233//1047
f 1224//1048 1230//1041 1229//1044 1223//1049
f 1228//1038 1234//1045 1233//1047 1227//1039
f 1225//1040 1227//1039 1224//1048 1222//1050
f 1233//1047 1235//1046 1232//1042 1230//1041
f 1227//1039 1233//1047 1230//1041 1224//1048
f 1200//1015 1201//1014 1224//1048 1223//1049
f 1197//1035 1222//1050 1224//1048 1201//1014
f 1219//1028 1229//1044 1231//1043 1221//1029
f 1202//1019 1203//1020 1226//1037 1225//1040
f 1197//1035 1202//1019 1225//1040 1222//1050
f 1200//1015 1223//1049 1229//1044 1219//1028
f 1237//1051 1238//1052 1240//1053 1239//1054
f 1241//1055 1242//1056 1244//1057 1243//1058
f 1245//185 1246//1059 1248//1059 1247//177
f 1249//1060 1250//1057 1252//1057 1251//1060
f 1239//1054 1240//1053 1246//1059 1245//185
f 1243//1058 1244//1057 1250//1057 1249//1060
f 1238//1052 1241//1055 1243//1058 1240//1053
f 1246//1059 1249//1060 1251//1060 1248//1059
f 1240//1053 1243//1058 1249//1060 1246//1059
f 1254//1042 1256//1042 1255//1061 1253//1061
f 1258//1045 1260//1045 1259//1046 1257//1046
f 1262//1042 1264//1042 1263//1061 1261//1061
f 1266//1045 1268//1045 1267//1046 1265//1046
f 1256//1042 1262//1042 1261//1061 1255//1061
f 1260//1045 1266//1045 1265//1046 1259//1046
f 1257//1046 1259//1046 1256//1042 1254//1042
f 1265//1046 1267//1046 1264//1042 1262//1042
f 1259//1046 1265//1046 1262//1042 1256//1042
f 1269//1062 1270//1063 1272//1064 1271//1065
f 1273//1066 1274//1067 1276//1068 1275//1069
f 1282//1070 1283//1071 1281//1072 1280//1073
f 1279//1074 1283//1071 1282//1070 1278//1075
f 1277//1076 1278//1075 1282//1070 1280//1073
f 1286//1077 1287//1078 1285//1078 1284//1079
f 1290//1080 1291//1081 1289//1082 1288//1083
f 1289//1082 1291//1081 1293//1084 1292//1085
f 1298//1086 1299//1078 1297//1078 1296//1087
f 1295//1088 1299//1078 1298//1086 1294//1089
f 1271//1065 1272//1064 1278//1075 1277//1076
f 1275//1069 1276//1068 1290//1080 1288//1083
f 1270//1063 1273//1066 1275//1069 1272//1064
f 1288//1083 1289//1082 1279//1074 1278//1075
f 1279//1074 1289//1082 1292//1085 1283//1071
f 1296//1087 1297//1078 1287//1078 1286//1077
f 1283//1071 1286//1077 1284//1079 1281//1072
f 1293//1084 1298//1086 1296//1087 1292//1085
f 1294//1089 1298//1086 1293//1084 1291//1081
f 1292//1085 1296//1087 1286//1077 1283//1071
f 1272//1064 1275//1069 1288//1083 1278//1075
f 1301//1090 1303//1091 1302//1092 1300//1093
f 1305//1045 1307//1094 1306//1095 1304//1046
f 1303//1091 1309//1096 1308//1097 1302//1092
f 1307//1094 1311//1098 1310//1099 1306//1095
f 1304//1046 1306//1095 1303//1091 1301//1090
f 1306//1095 1310//1099 1309//1096 1303//1091
f 1247//177 1248//1059 1270//1063 1269//1062
f 1251//1060 1252//1057 1274//1067 1273//1066
f 1248//1059 1251//1060 1273//1066 1270//1063
f 1264//1042 1301//1090 1300//1093 1263//1061
f 1268//1045 1305//1045 1304//1046 1267//1046
f 1267//1046 1304//1046 1301//1090 1264//1042
f 1242//1056 1253//1061 1255//1061 1244//1057
f 1250//1057 1261//1061 1263//1061 1252//1057
f 1244//1057 1255//1061 1261//1061 1250//1057
f 1274//1067 1300//1093 1302//1092 1276//1068
f 1308//1097 1309//1096 1291//1081 1290//1080
f 1310//1099 1311//1098 1295//1088 1294//1089
f 1309//1096 1310//1099 1294//1089 1291//1081
f 1276//1068 1302//1092 1308//1097 1290//1080
f 1252//1057 1263//1061 1300//1093 1274//1067
f 1212//1026 1213//1025 1238//1052 1237//1051
f 1220//1030 1221//1029 1242//1056 1241//1055
f 1213//1025 1220//1030 1241//1055 1238//1052
f 1232//1042 1254//1042 1253//1061 1231//1043
f 1236//1045 1258//1045 1257//1046 1235//1046
f 1235//1046 1257//1046 1254//1042 1232//1042
f 1221//1029 1231//1043 1253//1061 1242//1056
f 1312//1100 1313//176 1315//177 1314//177
f 1316//185 1317//177 1319//227 1318//177
f 1320//177 1321//218 1323//1101 1322//1102
f 1324//1103 1325//1104 1327//1105 1326//1106
f 1314//177 1315//177 1321//218 1320//177
f 1318//177 1319//227 1325//1104 1324//1103
f 1313//176 1316//185 1318//177 1315//177
f 1321//218 1324//1103 1326//1106 1323//1101
f 1315//177 1318//177 1324//1103 1321//218
f 1328//177 1329//186 1331//1107 1330//1108
f 1332//1109 1333//1110 1335//1111 1334//1112
f 1336//1113 1337//1114 1339//1115 1338//1116
f 1344//1117 1345//1118 1343//1119 1342//1120
f 1340//1121 1341//1122 1344//1117 1342//1120
f 1330//1108 1331//1107 1337//1114 1336//1113
f 1334//1112 1335//1111 1341//1122 1340//1121
f 1329//186 1332//1109 1334//1112 1331//1107
f 1337//1114 1340//1121 1342//1120 1339//1115
f 1331//1107 1334//1112 1340//1121 1337//1114
f 1348//1123 1349//1124 1351//1125 1350//1126
f 1358//1127 1359//1128 1357//1129 1356//1130
f 1355//1131 1359//1128 1358//1127 1354//1132
f 1353//1133 1354//1132 1358//1127 1356//1130
f 1362//1134 1363//1135 1361//1078 1360//1136
f 1366//1137 1367//1138 1365//1139 1364//1140
f 1371//1141 1372//1078 1370//1078 1369//1142
f 1370//1078 1374//1078 1373//1143 1369//1142
f 1352//1144 1367//1138 1366//1137 1351//1125
f 1350//1126 1351//1125 1366//1137 1364//1140
f 1361//1078 1377//1078 1376//1145 1360//1136
f 1356//1130 1357//1129 1352//1144 1351//1125
f 1349//1124 1353//1133 1356//1130 1351//1125
f 1376//1145 1377//1078 1372//1078 1371//1141
f 1359//1128 1362//1134 1360//1136 1357//1129
f 1367//1138 1371//1141 1369//1142 1365//1139
f 1369//1142 1373//1143 1368//1146 1365//1139
f 1375//1147 1376//1145 1371//1141 1367//1138
f 1360//1136 1376//1145 1375//1147 1357//1129
f 1352//1144 1357//1129 1375//1147 1367//1138
f 1380//1148 1381//1149 1379//1150 1378//1151
f 1388//1152 1389//1153 1387//1154 1386//1155
f 1385//1156 1389//1153 1388//1152 1384//1157
f 1383//1158 1384//1157 1388//1152 1386//1155
f 1395//1159 1396//1078 1394//1160 1393//1161
f 1390//1162 1391//1163 1381//1149 1380//1148
f 1393//1161 1394//1160 1385//1156 1384//1157
f 1381//1149 1384//1157 1383//1158 1379//1150
f 1383//1158 1386//1155 1382//1164 1379//1150
f 1392//1165 1395//1159 1393//1161 1391//1163
f 1391//1163 1393//1161 1384//1157 1381//1149
f 1322//1102 1323//1101 1349//1124 1348//1123
f 1326//1106 1327//1105 1354//1132 1353//1133
f 1323//1101 1326//1106 1353//1133 1349//1124
f 1338//1116 1339//1115 1380//1148 1378//1151
f 1343//1119 1391//1163 1390//1162 1342//1120
f 1343//1119 1345//1118 1392//1165 1391//1163
f 1347//1078 1396//1078 1395//1159 1346//1166
f 1346//1166 1395//1159 1392//1165 1345//1118
f 1339//1115 1342//1120 1390//1162 1380//1148
f 1317//177 1328//177 1330//1108 1319//227
f 1325//1104 1336//1113 1338//1116 1327//1105
f 1319//227 1330//1108 1336//1113 1325//1104
f 1378//1151 1379//1150 1355//1131 1354//1132
f 1355//1131 1379//1150 1382//1164 1359//1128
f 1386//1155 1387//1154 1363//1135 1362//1134
f 1382//1164 1386//1155 1362//1134 1359//1128
f 1327//1105 1338//1116 1378//1151 1354//1132
f 1397//1167 1398//1168 1400//1169 1399//1170
f 1405//1171 1406//1172 1404//1173 1403//1174
f 1401//1175 1402//1176 1405//1171 1403//1174
f 1409//1177 1410//1178 1408//1179 1407//1180
f 1408//1179 1412//1181 1411//1182 1407//1180
f 1408//1179 1410//1178 1413//1183 1412//1181
f 1418//1184 1419//1078 1417//1078 1416//1185
f 1415//1078 1419//1078 1418//1184 1414//1186
f 1425//1187 1426//1078 1424//1078 1423//1188
f 1399//1170 1400//1169 1409//1177 1407//1180
f 1404//1173 1421//1189 1420//1190 1403//1174
f 1404//1173 1406//1172 1422//1191 1421//1189
f 1398//1168 1401//1175 1403//1174 1400//1169
f 1420//1190 1421//1189 1410//1178 1409//1177
f 1423//1188 1424//1078 1415//1078 1414//1186
f 1413//1183 1418//1184 1416//1185 1412//1181
f 1414//1186 1418//1184 1413//1183 1410//1178
f 1422//1191 1425//1187 1423//1188 1421//1189
f 1421//1189 1423//1188 1414//1186 1410//1178
f 1400//1169 1403//1174 1420//1190 1409//1177
f 1432//1192 1433//1193 1431//1194 1430//1195
f 1429//1196 1433//1193 1432//1192 1428//1197
f 1427//1198 1428//1197 1432//1192 1430//1195
f 1436//1199 1437//1078 1435//1078 1434//1200
f 1440//1201 1441//1202 1439//1203 1438//1204
f 1445//1205 1446//1078 1444//1078 1443//1206
f 1444//1078 1448//1078 1447//1207 1443//1206
f 1435//1078 1451//1078 1450//1208 1434//1200
f 1438//1204 1439//1203 1429//1196 1428//1197
f 1429//1196 1439//1203 1442//1209 1433//1193
f 1447//1207 1448//1078 1437//1078 1436//1199
f 1433//1193 1436//1199 1434//1200 1431//1194
f 1441//1202 1445//1205 1443//1206 1439//1203
f 1443//1206 1447//1207 1442//1209 1439//1203
f 1442//1209 1447//1207 1436//1199 1433//1193
f 1434//1200 1450//1208 1449//1210 1431//1194
f 1430//1195 1431//1194 1406//1172 1405//1171
f 1402//1176 1427//1198 1430//1195 1405//1171
f 1450//1208 1451//1078 1426//1078 1425//1187
f 1449//1210 1450//1208 1425//1187 1422//1191
f 1406//1172 1431//1194 1449//1210 1422//1191
f 1453//1211 1454//1212 1456//1213 1455//1214
f 1459//1215 1460//1216 1462//1216 1461//1217
f 1458//1216 1460//1216 1459//1215 1457//1218
f 1466//1219 1467//1220 1470//1221 1469//1222
f 1471//1223 1472//1224 1474//1225 1473//1226
f 1474//1225 1477//1227 1476//1228 1473//1226
f 1471//1223 1473//1226 1476//1228 1475//1229
f 1478//1230 1479//1231 1481//1231 1480//1232
f 1456//1213 1468//1233 1467//1220 1455//1214
f 1453//1211 1455//1214 1467//1220 1466//1219
f 1465//1231 1479//1231 1478//1230 1464//1234
f 1467//1220 1468//1233 1472//1224 1471//1223
f 1467//1220 1471//1223 1475//1229 1470//1221
f 1461//1217 1462//1216 1465//1231 1464//1234
f 1454//1212 1459//1215 1461//1217 1456//1213
f 1457//1218 1459//1215 1454//1212 1452//1235
f 1472//1224 1478//1230 1480//1232 1474//1225
f 1456//1213 1461//1217 1464//1234 1463//1236
f 1464//1234 1478//1230 1472//1224 1463//1236
f 1456//1213 1463//1236 1472//1224 1468//1233
f 1483//1237 1484//1238 1486//1239 1485//1240
f 1489//1241 1490//1231 1492//1231 1491//1242
f 1488//1231 1490//1231 1489//1241 1487//1243
f 1495//1244 1496//1231 1498//1231 1497//1245
f 1491//1242 1492//1231 1496//1231 1495//1244
f 1484//1238 1489//1241 1491//1242 1486//1239
f 1487//1243 1489//1241 1484//1238 1482//1246
f 1493//1247 1495//1244 1497//1245 1494//1248
f 1486//1239 1491//1242 1495//1244 1493//1247
f 1499//1249 1500//1250 1502//1251 1501//1252
f 1503//1253 1504//1254 1506//1255 1505//1256
f 1507//177 1508//177 1510//1257 1509//1258
f 1511//177 1512//1259 1514//177 1513//177
f 1501//1252 1502//1251 1508//177 1507//177
f 1505//1256 1506//1255 1512//1259 1511//177
f 1500//1250 1503//1253 1505//1256 1502//1251
f 1508//177 1511//177 1513//177 1510//1257
f 1502//1251 1505//1256 1511//177 1508//177
f 1515//1260 1516//1261 1519//1262 1518//1263
f 1520//1264 1521//1265 1523//1266 1522//1267
f 1520//1264 1522//1267 1525//1268 1524//1269
f 1528//1270 1529//1271 1531//1272 1530//177
f 1532//1273 1533//1274 1535//1275 1534//1276
f 1518//1263 1519//1262 1529//1271 1528//1270
f 1524//1269 1525//1268 1533//1274 1532//1273
f 1516//1261 1517//1277 1521//1265 1520//1264
f 1516//1261 1520//1264 1524//1269 1519//1262
f 1529//1271 1532//1273 1534//1276 1531//1272
f 1519//1262 1524//1269 1532//1273 1529//1271
f 1469//1222 1470//1221 1500//1250 1499//1249
f 1475//1229 1476//1228 1504//1254 1503//1253
f 1470//1221 1475//1229 1503//1253 1500//1250
f 1486//1239 1517//1277 1516//1261 1485//1240
f 1483//1237 1485//1240 1516//1261 1515//1260
f 1493//1247 1494//1248 1523//1266 1521//1265
f 1498//1231 1527//1231 1526//1278 1497//1245
f 1497//1245 1526//1278 1523//1266 1494//1248
f 1486//1239 1493//1247 1521//1265 1517//1277
f 1476//1228 1477//1227 1484//1238 1483//1237
f 1474//1225 1482//1246 1484//1238 1477//1227
f 1480//1232 1481//1231 1488//1231 1487//1243
f 1474//1225 1480//1232 1487//1243 1482//1246
f 1504//1254 1515//1260 1518//1263 1506//1255
f 1512//1259 1528//1270 1530//177 1514//177
f 1506//1255 1518//1263 1528//1270 1512//1259
f 1476//1228 1483//1237 1515//1260 1504//1254
f 1539//1279 1540//1280 1542//1281 1541//1282
f 1537//1283 1540//1280 1539//1279 1536//1284
f 1537//1283 1538//1285 1542//1281 1540//1280
f 1543//1286 1544//1231 1546//1231 1545//1287
f 1546//1231 1548//1231 1547//1288 1545//1287
f 1552//1289 1553//1290 1555//1291 1554//1292
f 1556//1293 1557//1294 1559//1295 1558//1296
f 1560//1297 1561//1298 1563//1299 1562//1300
f 1560//1297 1562//1300 1565//1301 1564//1302
f 1539//1279 1541//1282 1557//1294 1556//1293
f 1550//1303 1561//1298 1560//1297 1549//1304
f 1550//1303 1551//1305 1563//1299 1561//1298
f 1541//1282 1542//1281 1550//1303 1549//1304
f 1557//1294 1560//1297 1564//1302 1559//1295
f 1547//1288 1548//1231 1553//1290 1552//1289
f 1537//1283 1543//1286 1545//1287 1538//1285
f 1545//1287 1547//1288 1542//1281 1538//1285
f 1550//1303 1552//1289 1554//1292 1551//1305
f 1542//1281 1547//1288 1552//1289 1550//1303
f 1554//1292 1566//1306 1563//1299 1551//1305
f 1541//1282 1549//1304 1560//1297 1557//1294
f 1572//1307 1573//1308 1575//1309 1574//1310
f 1570//1311 1573//1308 1572//1307 1569//1312
f 1570//1311 1571//1313 1575//1309 1573//1308
f 1576//1314 1577//1315 1579//1316 1578//1317
f 1581//1318 1582//1319 1584//1320 1583//1321
f 1587//1322 1588//1231 1590//1231 1589//1323
f 1586//1231 1588//1231 1587//1322 1585//1324
f 1568//1325 1577//1315 1576//1314 1567//1326
f 1574//1310 1575//1309 1582//1319 1581//1318
f 1571//1313 1580//1327 1582//1319 1575//1309
f 1578//1317 1579//1316 1586//1231 1585//1324
f 1570//1311 1576//1314 1578//1317 1571//1313
f 1582//1319 1587//1322 1589//1323 1584//1320
f 1585//1324 1587//1322 1582//1319 1580//1327
f 1571//1313 1578//1317 1585//1324 1580//1327
f 1562//1300 1563//1299 1570//1311 1569//1312
f 1562//1300 1569//1312 1572//1307 1565//1301
f 1554//1292 1555//1291 1568//1325 1567//1326
f 1563//1299 1566//1306 1576//1314 1570//1311
f 1554//1292 1567//1326 1576//1314 1566//1306
f 1333//1110 1397//1167 1399//1170 1335//1111
f 1411//1182 1412//1181 1345//1118 1344//1117
f 1341//1122 1407//1180 1411//1182 1344//1117
f 1416//1185 1417//1078 1347//1078 1346//1166
f 1412//1181 1416//1185 1346//1166 1345//1118
f 1335//1111 1399//1170 1407//1180 1341//1122
f 1522//1267 1523//1266 1537//1283 1536//1284
f 1522//1267 1536//1284 1539//1279 1525//1268
f 1533//1274 1556//1293 1558//1296 1535//1275
f 1526//1278 1527//1231 1544//1231 1543//1286
f 1523//1266 1526//1278 1543//1286 1537//1283
f 1525//1268 1539//1279 1556//1293 1533//1274
f 1085//926 1086//925 1313//176 1312//1100
f 1089//930 1090//929 1317//177 1316//185
f 1086//925 1089//930 1316//185 1313//176
f 1102//184 1103//177 1329//186 1328//177
f 1106//177 1107//177 1333//1110 1332//1109
f 1103//177 1106//177 1332//1109 1329//186
f 1090//929 1102//184 1328//177 1317//177
f 1169//218 1170//991 1398//1168 1397//1167
f 1173//994 1174//993 1402//1176 1401//1175
f 1170//991 1173//994 1401//1175 1398//1168
f 1185//1002 1186//1001 1428//1197 1427//1198
f 1191//1328 1441//1202 1440//1201 1190//1005
f 1189//1006 1190//1005 1440//1201 1438//1204
f 1186//1001 1189//1006 1438//1204 1428//1197
f 1174//993 1185//1002 1427//1198 1402//1176
f 1107//177 1169//218 1397//1167 1333//1110
f 1285//1078 1593//1078 1592//1329 1284//1079
f 1284//1079 1592//1329 1591//1330 1281//1072
f 1019//873 1020//874 1209//1022 1208//1021
f 1019//873 1208//1021 1212//1026 1023//872
f 1027//878 1028//877 1215//1032 1214//1031
f 1020//874 1027//878 1214//1031 1209//1022
f 1148//981 1237//1051 1239//1054 1150//982
f 1156//988 1245//185 1247//177 1158//177
f 1150//982 1239//1054 1245//185 1156//988
f 1180//218 1269//1062 1271//1065 1182//997
f 1280//1073 1281//1072 1191//1328 1190//1005
f 1188//1004 1277//1076 1280//1073 1190//1005
f 1182//997 1271//1065 1277//1076 1188//1004
f 1158//177 1247//177 1269//1062 1180//218
f 1023//872 1212//1026 1237//1051 1148//981
f 1592//1329 1593//1078 1446//1078 1445//1205
f 1591//1330 1592//1329 1445//1205 1441//1202
f 1589//1323 1590//1231 1596//1231 1595//1331
f 1584//1320 1589//1323 1595//1331 1594//1332
f 1191//1328 1281//1072 1591//1330 1441//1202
f 1597//1333 1598//1334 1600//1335 1599//1336
f 1601//1337 1602//1338 1604//1339 1603//1340
f 1607//1341 1608//1342 1606//1343 1605//1344
f 1607//1341 1610//1345 1611//1346 1608//1342
f 1606//1343 1608//1342 1611//1346 1609//1347
f 1616//1348 1617//102 1615//102 1614//1349
f 1612//1350 1614//1349 1615//102 1613//102
f 1622//1351 1623//1352 1621//1353 1620//1354
f 1618//1355 1619//1356 1622//1351 1620//1354
f 1599//1336 1600//1335 1607//1341 1605//1344
f 1603//1340 1604//1339 1619//1356 1618//1355
f 1598//1334 1601//1337 1603//1340 1600//1335
f 1620//1354 1621//1353 1611//1346 1610//1345
f 1607//1341 1618//1355 1620//1354 1610//1345
f 1624//1357 1625//102 1617//102 1616//1348
f 1611//1346 1616//1348 1614//1349 1609//1347
f 1606//1343 1609//1347 1614//1349 1612//1350
f 1621//1353 1624//1357 1616//1348 1611//1346
f 1600//1335 1603//1340 1618//1355 1607//1341
f 1626//1358 1627//177 1629//1359 1628//1360
f 1630//177 1631//1361 1633//177 1632//1362
f 1634//1363 1635//1364 1637//1365 1636//1366
f 1638//1367 1639//1368 1641//1369 1640//1370
f 1628//1360 1629//1359 1635//1364 1634//1363
f 1632//1362 1633//177 1639//1368 1638//1367
f 1627//177 1630//177 1632//1362 1629//1359
f 1635//1364 1638//1367 1640//1370 1637//1365
f 1629//1359 1632//1362 1638//1367 1635//1364
f 1647//1371 1648//102 1646//102 1645//1372
f 1644//1373 1647//1371 1645//1372 1642//1374
f 1651//1375 1652//1376 1650//1377 1649//1378
f 1659//1379 1660//1380 1658//1381 1657//1382
f 1654//1383 1657//1382 1658//1381 1655//1384
f 1654//1383 1656//1385 1659//1379 1657//1382
f 1666//1386 1667//1387 1665//1388 1664//1389
f 1661//1390 1664//1389 1665//1388 1662//1391
f 1661//1390 1663//1392 1666//1386 1664//1389
f 1670//1393 1671//102 1669//102 1668//1394
f 1670//1393 1673//1395 1674//102 1671//102
f 1661//1390 1662//1391 1652//1376 1651//1375
f 1652//1376 1662//1391 1665//1388 1653//1396
f 1668//1394 1669//102 1660//1380 1659//1379
f 1652//1376 1656//1385 1654//1383 1650//1377
f 1652//1376 1653//1396 1659//1379 1656//1385
f 1667//1387 1670//1393 1668//1394 1665//1388
f 1665//1388 1668//1394 1659//1379 1653//1396
f 1667//1387 1672//1397 1673//1395 1670//1393
f 1622//1351 1643//1398 1644//1373 1623//1352
f 1621//1353 1623//1352 1644//1373 1642//1374
f 1624//1357 1645//1372 1646//102 1625//102
f 1621//1353 1642//1374 1645//1372 1624//1357
f 1636//1366 1637//1365 1651//1375 1649//1378
f 1640//1370 1641//1369 1663//1392 1661//1390
f 1637//1365 1640//1370 1661//1390 1651//1375
f 1602//1338 1626//1358 1628//1360 1604//1339
f 1619//1356 1634//1363 1636//1366 1622//1351
f 1604//1339 1628//1360 1634//1363 1619//1356
f 1649//1378 1650//1377 1644//1373 1643//1398
f 1654//1383 1655//1384 1648//102 1647//1371
f 1650//1377 1654//1383 1647//1371 1644//1373
f 1622//1351 1636//1366 1649//1378 1643//1398
f 1675//1399 1676//1400 1678//177 1677//177
f 1679//1401 1680//1402 1682//1403 1681//1404
f 1683//1405 1684//1406 1686//1407 1685//1408
f 1687//177 1688//177 1690//1409 1689//1410
f 1677//177 1678//177 1684//1406 1683//1405
f 1681//1404 1682//1403 1688//177 1687//177
f 1676//1400 1679//1401 1681//1404 1678//177
f 1684//1406 1687//177 1689//1410 1686//1407
f 1678//177 1681//1404 1687//177 1684//1406
f 1691//1411 1692//1412 1694//1413 1693//1414
f 1695//1415 1696//1416 1699//1417 1698//1418
f 1700//1419 1701//1420 1703//177 1702//177
f 1704//1421 1705//1422 1707//1423 1706//1424
f 1693//1414 1694//1413 1701//1420 1700//1419
f 1698//1418 1699//1417 1705//1422 1704//1421
f 1692//1412 1695//1415 1698//1418 1694//1413
f 1701//1420 1704//1421 1706//1424 1703//177
f 1694//1413 1698//1418 1704//1421 1701//1420
f 1708//1425 1709//1426 1712//1427 1710//1428
f 1713//1429 1714//1430 1716//1431 1715//1432
f 1719//1433 1720//1434 1718//1435 1717//1436
f 1724//1437 1725//102 1723//102 1722//1438
f 1724//1437 1726//1439 1727//102 1725//102
f 1733//1440 1734//1441 1732//1442 1731//1443
f 1728//1444 1731//1443 1732//1442 1729//1445
f 1728//1444 1730//1446 1733//1440 1731//1443
f 1737//1447 1738//102 1736//102 1735//1448
f 1710//1428 1717//1436 1718//1435 1711//1449
f 1710//1428 1712//1427 1719//1433 1717//1436
f 1715//1432 1716//1431 1730//1446 1728//1444
f 1709//1426 1713//1429 1715//1432 1712//1427
f 1728//1444 1729//1445 1720//1434 1719//1433
f 1720//1434 1729//1445 1732//1442 1721//1450
f 1735//1448 1736//102 1727//102 1726//1439
f 1720//1434 1724//1437 1722//1438 1718//1435
f 1720//1434 1721//1450 1726//1439 1724//1437
f 1734//1441 1737//1447 1735//1448 1732//1442
f 1732//1442 1735//1448 1726//1439 1721//1450
f 1712//1427 1715//1432 1728//1444 1719//1433
f 1739//1451 1740//1452 1742//1453 1741//1454
f 1743//177 1744//177 1746//1455 1745//1456
f 1751//1457 1752//1458 1750//1459 1749//1460
f 1747//1461 1748//1462 1751//1457 1749//1460
f 1755//1463 1756//1464 1758//1465 1757//1466
f 1741//1454 1742//1453 1748//1462 1747//1461
f 1745//1456 1746//1455 1756//1464 1755//1463
f 1740//1452 1743//177 1745//1456 1742//1453
f 1748//1462 1755//1463 1757//1466 1751//1457
f 1742//1453 1745//1456 1755//1463 1748//1462
f 1685//1408 1686//1407 1709//1426 1708//1425
f 1689//1410 1690//1409 1714//1430 1713//1429
f 1686//1407 1689//1410 1713//1429 1709//1426
f 1702//177 1703//177 1740//1452 1739//1451
f 1706//1424 1707//1423 1744//177 1743//177
f 1703//177 1706//1424 1743//177 1740//1452
f 1680//1402 1691//1411 1693//1414 1682//1403
f 1688//177 1700//1419 1702//177 1690//1409
f 1682//1403 1693//1414 1700//1419 1688//177
f 1714//1430 1739//1451 1741//1454 1716//1431
f 1749//1460 1750//1459 1734//1441 1733//1440
f 1730//1446 1747//1461 1749//1460 1733//1440
f 1753//1467 1754//102 1738//102 1737//1447
f 1750//1459 1753//1467 1737//1447 1734//1441
f 1716//1431 1741//1454 1747//1461 1730//1446
f 1690//1409 1702//177 1739//1451 1714//1430
f 1764//1468 1765//102 1763//102 1762//1469
f 1768//1470 1769//1471 1767//1472 1766//1473
f 1768//1470 1771//1474 1772//1475 1769//1471
f 1767//1472 1769//1471 1772//1475 1770//1476
f 1777//1477 1778//419 1776//419 1775//1478
f 1773//1479 1775//1478 1776//419 1774//102
f 1766//1473 1767//1472 1761//1480 1760//1481
f 1773//1479 1774//102 1765//102 1764//1468
f 1761//1480 1764//1468 1762//1469 1759//1482
f 1772//1475 1777//1477 1775//1478 1770//1476
f 1767//1472 1770//1476 1775//1478 1773//1479
f 1767//1472 1773//1479 1764//1468 1761//1480
f 1751//1457 1760//1481 1761//1480 1752//1458
f 1750//1459 1752//1458 1761//1480 1759//1482
f 1753//1467 1762//1469 1763//102 1754//102
f 1757//1466 1758//1465 1768//1470 1766//1473
f 1750//1459 1759//1482 1762//1469 1753//1467
f 1751//1457 1757//1466 1766//1473 1760//1481
f 1631//1361 1675//1399 1677//177 1633//177
f 1639//1368 1683//1405 1685//1408 1641//1369
f 1633//177 1677//177 1683//1405 1639//1368
f 1710//1428 1711//1449 1667//1387 1666//1386
f 1663//1392 1708//1425 1710//1428 1666//1386
f 1722//1438 1723//102 1674//102 1673//1395
f 1718//1435 1722//1438 1673//1395 1672//1397
f 1667//1387 1711//1449 1718//1435 1672//1397
f 1641//1369 1685//1408 1708//1425 1663//1392
f 1779//1483 1780//1484 1782//1485 1781//1486
f 1782//1485 1785//1487 1784//1488 1781//1486
f 1779//1483 1781//1486 1784//1488 1783//1489
f 1786//1490 1787//1231 1789//1491 1788//1492
f 1791//1493 1792//1494 1794//1495 1793//1496
f 1795//1497 1796//1498 1798//1499 1797//1500
f 1798//1499 1801//1501 1800//1502 1797//1500
f 1795//1497 1797//1500 1800//1502 1799//1503
f 1802//1504 1803//1505 1805//1506 1804//1507
f 1806//1508 1807//1509 1809//1510 1808//1511
f 1783//1489 1784//1488 1803//1505 1802//1504
f 1791//1493 1793//1496 1807//1509 1806//1508
f 1784//1488 1785//1487 1792//1494 1791//1493
f 1782//1485 1790//1512 1792//1494 1785//1487
f 1803//1505 1806//1508 1808//1511 1805//1506
f 1788//1492 1789//1491 1796//1498 1795//1497
f 1780//1484 1786//1490 1788//1492 1782//1485
f 1792//1494 1799//1503 1800//1502 1794//1495
f 1795//1497 1799//1503 1792//1494 1790//1512
f 1782//1485 1788//1492 1795//1497 1790//1512
f 1784//1488 1791//1493 1806//1508 1803//1505
f 1815//1513 1817//1514 1816//1515 1814//1516
f 1819//1517 1821//1045 1820//1518 1818//1519
f 1811//1520 1815//1513 1814//1516 1810//1521
f 1813//1522 1819//1517 1818//1519 1812//1523
f 1818//1519 1820//1518 1817//1514 1815//1513
f 1812//1523 1818//1519 1815//1513 1811//1520
f 1822//177 1823//1059 1825//1059 1824//1524
f 1826//1060 1827//1057 1829//1057 1828//1060
f 1830//1525 1831//1526 1833//1527 1832//1528
f 1834//1529 1835//1057 1837//1530 1836//1531
f 1824//1524 1825//1059 1831//1526 1830//1525
f 1828//1060 1829//1057 1835//1057 1834//1529
f 1823//1059 1826//1060 1828//1060 1825//1059
f 1831//1526 1834//1529 1836//1531 1833//1527
f 1825//1059 1828//1060 1834//1529 1831//1526
f 1839//1042 1841//1042 1840//1061 1838//1061
f 1843//1045 1845//1045 1844//1046 1842//1046
f 1847//1042 1849//1042 1848//1061 1846//1061
f 1851//1045 1853//1045 1852//1046 1850//1046
f 1841//1042 1847//1042 1846//1061 1840//1061
f 1845//1045 1851//1045 1850//1046 1844//1046
f 1842//1046 1844//1046 1841//1042 1839//1042
f 1850//1046 1852//1046 1849//1042 1847//1042
f 1844//1046 1850//1046 1847//1042 1841//1042
f 1804//1507 1805//1506 1823//1059 1822//177
f 1808//1511 1809//1510 1827//1057 1826//1060
f 1805//1506 1808//1511 1826//1060 1823//1059
f 1817//1514 1839//1042 1838//1061 1816//1515
f 1821//1045 1843//1045 1842//1046 1820//1518
f 1820//1518 1842//1046 1839//1042 1817//1514
f 1793//1496 1794//1495 1811//1520 1810//1521
f 1807//1509 1814//1516 1816//1515 1809//1510
f 1800//1502 1801//1501 1813//1522 1812//1523
f 1794//1495 1800//1502 1812//1523 1811//1520
f 1793//1496 1810//1521 1814//1516 1807//1509
f 1827//1057 1838//1061 1840//1061 1829//1057
f 1835//1057 1846//1061 1848//1061 1837//1530
f 1829//1057 1840//1061 1846//1061 1835//1057
f 1809//1510 1816//1515 1838//1061 1827//1057
f 1858//1532 1859//1533 1857//1534 1856//1535
f 1854//1536 1855//1537 1858//1532 1856//1535
f 1862//1538 1863//1539 1866//1540 1864//1541
f 1871//1542 1872//102 1870//102 1869//1543
f 1875//1544 1876//1545 1874//1546 1873//1547
f 1880//1548 1881//102 1879//102 1878//1549
f 1880//1548 1882//1550 1883//1551 1881//102
f 1857//1534 1859//1533 1868//1552 1867//1553
f 1860//1554 1869//1543 1870//102 1861//419
f 1864//1541 1873//1547 1874//1546 1865//1555
f 1864//1541 1866//1540 1875//1544 1873//1547
f 1864//1541 1865//1555 1859//1533 1858//1532
f 1855//1537 1862//1538 1864//1541 1858//1532
f 1878//1549 1879//102 1872//102 1871//1542
f 1868//1552 1871//1542 1869//1543 1867//1553
f 1876//1545 1880//1548 1878//1549 1874//1546
f 1876//1545 1877//1556 1882//1550 1880//1548
f 1874//1546 1878//1549 1871//1542 1868//1552
f 1857//1534 1867//1553 1869//1543 1860//1554
f 1859//1533 1865//1555 1874//1546 1868//1552
f 1885//1042 1887//1557 1886//1558 1884//1559
f 1889//1045 1891//1045 1890//1560 1888//1046
f 1896//1561 1898//1562 1897//1563 1895//1564
f 1887//1557 1893//1565 1892//1566 1886//1558
f 1891//1045 1896//1561 1895//1564 1890//1560
f 1888//1046 1890//1560 1887//1557 1885//1042
f 1895//1564 1897//1563 1894//1567 1893//1565
f 1890//1560 1895//1564 1893//1565 1887//1557
f 1863//1539 1884//1559 1886//1558 1866//1540
f 1892//1566 1893//1565 1876//1545 1875//1544
f 1876//1545 1893//1565 1894//1567 1877//1556
f 1897//1563 1898//1562 1883//1551 1882//1550
f 1894//1567 1897//1563 1882//1550 1877//1556
f 1866//1540 1886//1558 1892//1566 1875//1544
f 1832//1528 1833//1527 1855//1537 1854//1536
f 1836//1531 1837//1530 1863//1539 1862//1538
f 1833//1527 1836//1531 1862//1538 1855//1537
f 1849//1042 1885//1042 1884//1559 1848//1061
f 1853//1045 1889//1045 1888//1046 1852//1046
f 1852//1046 1888//1046 1885//1042 1849//1042
f 1837//1530 1848//1061 1884//1559 1863//1539
f 1696//1416 1697//1568 1780//1484 1779//1483
f 1696//1416 1779//1483 1783//1489 1699//1417
f 1705//1422 1802//1504 1804//1507 1707//1423
f 1699//1417 1783//1489 1802//1504 1705//1422
f 1744//177 1822//177 1824//1524 1746//1455
f 1756//1464 1830//1525 1832//1528 1758//1465
f 1746//1455 1824//1524 1830//1525 1756//1464
f 1707//1423 1804//1507 1822//177 1744//177
f 1856//1535 1857//1534 1772//1475 1771//1474
f 1768//1470 1854//1536 1856//1535 1771//1474
f 1860//1554 1861//419 1778//419 1777//1477
f 1857//1534 1860//1554 1777//1477 1772//1475
f 1758//1465 1832//1528 1854//1536 1768//1470
f 1509//1258 1510//1257 1598//1334 1597//1333
f 1513//177 1514//177 1602//1338 1601//1337
f 1510//1257 1513//177 1601//1337 1598//1334
f 1530//177 1531//1272 1627//177 1626//1358
f 1534//1276 1535//1275 1631//1361 1630//177
f 1531//1272 1534//1276 1630//177 1627//177
f 1514//177 1530//177 1626//1358 1602//1338
f 1558//1296 1559//1295 1676//1400 1675//1399
f 1564//1302 1565//1301 1680//1402 1679//1401
f 1559//1295 1564//1302 1679//1401 1676//1400
f 1572//1307 1574//1310 1692//1412 1691//1411
f 1584//1320 1697//1568 1696//1416 1583//1321
f 1581//1318 1583//1321 1696//1416 1695//1415
f 1574//1310 1581//1318 1695//1415 1692//1412
f 1565//1301 1572//1307 1691//1411 1680//1402
f 1535//1275 1558//1296 1675//1399 1631//1361
f 1596//1231 1787//1231 1786//1490 1595//1331
f 1595//1331 1786//1490 1780//1484 1594//1332
f 1584//1320 1594//1332 1780//1484 1697//1568
f 1899//1569 1900//1570 1902//1571 1901//1569
f 1906//1569 1907//1572 1909//1573 1908//1574
f 1906//1569 1910//1569 1911//1575 1907//1572
f 1915//1576 1916//1577 1918//1578 1917//1579
f 1913//1580 1917//1579 1918//1578 1914//1581
f 1915//1576 1917//1579 1913//1580 1912//1582
f 1901//1569 1902//1571 1911//1575 1910//1569
f 1904//1583 1905//1584 1916//1577 1915//1576
f 1900//1570 1903//1585 1904//1583 1902//1571
f 1907//1572 1912//1582 1913//1580 1909//1573
f 1907//1572 1911//1575 1915//1576 1912//1582
f 1902//1571 1904//1583 1915//1576 1911//1575
f 1919//1586 1920//1587 1922//1588 1921//1589
f 1929//1590 1930//1591 1932//1592 1931//444
f 1927//444 1931//444 1932//1592 1928//1593
f 1934//1594 1935//1595 1937//1596 1936//1597
f 1938//444 1939//1598 1941//1599 1940//444
f 1942//1600 1943//1601 1945//1602 1944//1603
f 1942//1600 1946//1604 1947//1605 1943//1601
f 1947//1605 1948//1606 1945//1602 1943//1601
f 1924//444 1940//444 1941//1599 1925//1607
f 1927//444 1928//1593 1939//1598 1938//444
f 1936//1597 1937//1596 1947//1605 1946//1604
f 1936//1597 1946//1604 1942//1600 1933//1608
f 1930//1591 1934//1594 1936//1597 1932//1592
f 1928//1593 1932//1592 1936//1597 1933//1608
f 1939//1598 1942//1600 1944//1603 1941//1599
f 1928//1593 1933//1608 1942//1600 1939//1598
f 1925//1607 1941//1599 1944//1603 1926//1609
f 1949//444 1950//1610 1952//1611 1951//1574
f 1949//444 1953//444 1954//1612 1950//1610
f 1958//1613 1959//1614 1961//1615 1960//1616
f 1956//1617 1960//1616 1961//1615 1957//1618
f 1958//1613 1960//1616 1956//1617 1955//1619
f 1965//1620 1966//1621 1968//1622 1967//1623
f 1969//1624 1970//1625 1968//1622 1966//1621
f 1973//1626 1974//1627 1972//1628 1971//1629
f 1977//1630 1978//1631 1976//1632 1975//1633
f 1971//1629 1972//1628 1961//1615 1959//1614
f 1975//1633 1976//1632 1970//1625 1969//1624
f 1951//1574 1952//1611 1963//1634 1962//1635
f 1956//1617 1957//1618 1966//1621 1965//1620
f 1961//1615 1969//1624 1966//1621 1957//1618
f 1974//1627 1977//1630 1975//1633 1972//1628
f 1950//1610 1955//1619 1956//1617 1952//1611
f 1950//1610 1954//1612 1958//1613 1955//1619
f 1963//1634 1965//1620 1967//1623 1964//1636
f 1952//1611 1956//1617 1965//1620 1963//1634
f 1972//1628 1975//1633 1969//1624 1961//1615
f 1982//1637 1983//1638 1981//1639 1980//1640
f 1986//1641 1987//1642 1985//1643 1984//1644
f 1990//616 1991//609 1989//617 1988//1645
f 1994//609 1995//609 1993//609 1992//647
f 1988//1645 1989//617 1983//1638 1982//1637
f 1992//647 1993//609 1987//1642 1986//1641
f 1983//1638 1986//1641 1984//1644 1981//1639
f 1991//609 1994//609 1992//647 1989//617
f 1989//617 1992//647 1986//1641 1983//1638
f 1919//1586 1962//1635 1963//1634 1920//1587
f 1963//1634 1964//1636 1922//1588 1920//1587
f 1922//1588 1964//1636 1967//1623 1923//1646
f 1934//1594 1979//1647 1980//1640 1935//1595
f 1980//1640 1981//1639 1937//1596 1935//1595
f 1984//1644 1985//1643 1948//1606 1947//1605
f 1981//1639 1984//1644 1947//1605 1937//1596
f 1921//1589 1922//1588 1930//1591 1929//1590
f 1922//1588 1923//1646 1934//1594 1930//1591
f 1967//1623 1968//1622 1980//1640 1979//1647
f 1970//1625 1982//1637 1980//1640 1968//1622
f 1978//1631 1990//616 1988//1645 1976//1632
f 1976//1632 1988//1645 1982//1637 1970//1625
f 1967//1623 1979//1647 1934//1594 1923//1646
f 1998//1574 1999//1648 2001//1649 2000//1650
f 1996//1651 2000//1650 2001//1649 1997//1652
f 2002//1653 2003//1654 2005//1655 2004//1656
f 2006//1589 2007//1657 2009//1658 2008//1590
f 2014//1659 2015//1660 2017//1661 2016//1662
f 2012//1663 2016//1662 2017//1661 2013//1664
f 2014//1659 2016//1662 2012//1663 2011//1665
f 2021//1666 2022//1667 2020//1668 2019//1669
f 2025//1670 2026//1671 2024//1672 2023//1673
f 2002//1653 2018//1674 2019//1669 2003//1654
f 2019//1669 2020//1668 2005//1655 2003//1654
f 2023//1673 2024//1672 2017//1661 2015//1660
f 1996//1651 1997//1652 2007//1657 2006//1589
f 2001//1649 2010//1675 2007//1657 1997//1652
f 2004//1656 2005//1655 2015//1660 2014//1659
f 2022//1667 2025//1670 2023//1673 2020//1668
f 1999//1648 2002//1653 2004//1656 2001//1649
f 2007//1657 2011//1665 2012//1663 2009//1658
f 2007//1657 2010//1675 2014//1659 2011//1665
f 2001//1649 2004//1656 2014//1659 2010//1675
f 2020//1668 2023//1673 2015//1660 2005//1655
f 2029//1676 2030//1677 2032//1678 2031//1679
f 2033//1680 2034//1681 2032//1678 2030//1677
f 2037//1682 2038//1683 2036//1684 2035//1685
f 2041//1686 2042//647 2040//1687 2039//1688
f 2045//609 2046//609 2044//1689 2043//1690
f 2039//1688 2040//1687 2034//1681 2033//1680
f 2043//1690 2044//1689 2038//1683 2037//1682
f 2034//1681 2037//1682 2035//1685 2032//1678
f 2042//647 2045//609 2043//1690 2040//1687
f 2040//1687 2043//1690 2037//1682 2034//1681
f 2049//1689 2050//619 2048//1691 2047//1692
f 2053//609 2054//609 2052//616 2051//1631
f 2057//651 2058//1693 2056//609 2055//609
f 2061//1694 2062//1695 2060//1696 2059//664
f 2055//609 2056//609 2050//619 2049//1689
f 2059//664 2060//1696 2054//609 2053//609
f 2050//619 2053//609 2051//1631 2048//1691
f 2058//1693 2061//1694 2059//664 2056//609
f 2056//609 2059//664 2053//609 2050//619
f 2065//1697 2066//1698 2064//609 2063//609
f 2069//1699 2070//1700 2068//651 2067//609
f 2073//1701 2074//1702 2072//1703 2071//1704
f 2077//1705 2079//1706 2076//1707 2075//1708
f 2071//1704 2072//1703 2066//1698 2065//1697
f 2075//1708 2076//1707 2070//1700 2069//1699
f 2066//1698 2069//1699 2067//609 2064//609
f 2074//1702 2077//1705 2075//1708 2072//1703
f 2072//1703 2075//1708 2069//1699 2066//1698
f 2047//1692 2048//1691 2022//1667 2021//1666
f 2051//1631 2052//616 2026//1671 2025//1670
f 2048//1691 2051//1631 2025//1670 2022//1667
f 2063//609 2064//609 2042//647 2041//1686
f 2067//609 2068//651 2046//609 2045//609
f 2064//609 2067//609 2045//609 2042//647
f 2008//1590 2009//1658 2028//1709 2027//1569
f 2012//1663 2013//1664 2030//1677 2029//1676
f 2017//1661 2033//1680 2030//1677 2013//1664
f 2026//1671 2041//1686 2039//1688 2024//1672
f 2009//1658 2012//1663 2029//1676 2028//1709
f 2024//1672 2039//1688 2033//1680 2017//1661
f 2054//609 2065//1697 2063//609 2052//616
f 2062//1695 2073//1701 2071//1704 2060//1696
f 2060//1696 2071//1704 2065//1697 2054//609
f 2052//616 2063//609 2041//1686 2026//1671
f 1899//1569 2027//1569 2028//1709 1900//1570
f 1904//1583 2031//1679 2032//1678 1905//1584
f 2029//1676 2031//1679 1904//1583 1903//1585
f 2035//1685 2036//1684 1918//1578 1916//1577
f 1900//1570 2028//1709 2029//1676 1903//1585
f 2032//1678 2035//1685 1916//1577 1905//1584
f 1924//444 1925//1607 1999//1648 1998//1574
f 1944//1603 1945//1602 2019//1669 2018//1674
f 1948//1606 2021//1666 2019//1669 1945//1602
f 1925//1607 1926//1609 2002//1653 1999//1648
f 1944//1603 2018//1674 2002//1653 1926//1609
f 1987//1642 2049//1689 2047//1692 1985//1643
f 1995//609 2057//651 2055//609 1993//609
f 1993//609 2055//609 2049//1689 1987//1642
f 1985//1643 2047//1692 2021//1666 1948//1606
f 2080//1710 2081//1711 2083//1712 2082//1713
f 2087//1590 2088//1714 2090//1709 2089//1569
f 2085//1715 2089//1569 2090//1709 2086//1716
f 2092//1717 2093//1718 2095//1719 2094//1720
f 2099//1721 2100//1722 2102//1723 2101//1724
f 2103//1725 2104//1726 2102//1723 2100//1722
f 2108//1727 2109//1728 2107//1729 2106//1730
f 2080//1710 2096//1731 2097//1732 2081//1711
f 2097//1732 2098//1733 2083//1712 2081//1711
f 2092//1717 2105//1734 2106//1730 2093//1718
f 2106//1730 2107//1729 2095//1719 2093//1718
f 2082//1713 2083//1712 2088//1714 2087//1590
f 2101//1724 2102//1723 2106//1730 2105//1734
f 2104//1726 2108//1727 2106//1730 2102//1723
f 2088//1714 2092//1717 2094//1720 2090//1709
f 2086//1716 2090//1709 2094//1720 2091//1735
f 2097//1732 2099//1721 2101//1724 2098//1733
f 2083//1712 2084//1736 2092//1717 2088//1714
f 2083//1712 2098//1733 2101//1724 2084//1736
f 2101//1724 2105//1734 2092//1717 2084//1736
f 2111//1737 2113//1738 2112//1739 2110//1740
f 2118//1741 2120//1742 2119//1743 2117//1743
f 2122//1744 2124//1745 2123//1746 2121//1747
f 2113//1738 2118//1741 2117//1743 2112//1739
f 2116//1748 2122//1744 2121//1747 2115//1749
f 2114//1750 2115//1749 2113//1738 2111//1737
f 2121//1747 2123//1746 2120//1742 2118//1741
f 2115//1749 2121//1747 2118//1741 2113//1738
f 2085//1715 2086//1716 2111//1737 2110//1740
f 2094//1720 2095//1719 2116//1748 2115//1749
f 2094//1720 2115//1749 2114//1750 2091//1735
f 2109//1728 2124//1745 2122//1744 2107//1729
f 2086//1716 2091//1735 2114//1750 2111//1737
f 2107//1729 2122//1744 2116//1748 2095//1719
f 2127//1751 2128//1752 2126//1753 2125//1754
f 2131//1755 2132//1756 2130//1757 2129//1758
f 2135//609 2136//1759 2134//1759 2133//619
f 2139//1760 2140//1756 2138//1756 2137//1760
f 2133//619 2134//1759 2128//1752 2127//1751
f 2137//1760 2138//1756 2132//1756 2131//1755
f 2128//1752 2131//1755 2129//1758 2126//1753
f 2136//1759 2139//1760 2137//1760 2134//1759
f 2134//1759 2137//1760 2131//1755 2128//1752
f 2142//1742 2144//1742 2143//1743 2141//1743
f 2146//1761 2148//1761 2147//1746 2145//1746
f 2150//1742 2152//1742 2151//1743 2149//1743
f 2154//1762 2156//1762 2155//1746 2153//1746
f 2144//1742 2150//1742 2149//1743 2143//1743
f 2148//1761 2154//1762 2153//1746 2147//1746
f 2145//1746 2147//1746 2144//1742 2142//1742
f 2153//1746 2155//1746 2152//1742 2150//1742
f 2147//1746 2153//1746 2150//1742 2144//1742
f 2159//1763 2160//1764 2158//1765 2157//1766
f 2163//1767 2164//1768 2162//1769 2161//1770
f 2167//1771 2168//1772 2166//1773 2165//1771
f 2174//1774 2175//1775 2173//1776 2172//1777
f 2171//1778 2175//1775 2174//1774 2170//1779
f 2173//1776 2175//1775 2171//1778 2169//1780
f 2180//1771 2181//1781 2179//1782 2178//1771
f 2177//1783 2181//1781 2180//1771 2176//1784
f 2184//1785 2185//1786 2183//1787 2182//1788
f 2186//1789 2187//1790 2184//1785 2182//1788
f 2169//1780 2171//1778 2160//1764 2159//1763
f 2183//1787 2185//1786 2164//1768 2163//1767
f 2178//1771 2179//1782 2168//1772 2167//1771
f 2160//1764 2163//1767 2161//1770 2158//1765
f 2182//1788 2183//1787 2171//1778 2170//1779
f 2174//1774 2186//1789 2182//1788 2170//1779
f 2168//1772 2174//1774 2172//1777 2166//1773
f 2181//1781 2187//1790 2186//1789 2179//1782
f 2184//1785 2187//1790 2181//1781 2177//1783
f 2179//1782 2186//1789 2174//1774 2168//1772
f 2171//1778 2183//1787 2163//1767 2160//1764
f 2189//1742 2191//1791 2190//1792 2188//1743
f 2193//1793 2195//1794 2194//1795 2192//1796
f 2191//1791 2197//1797 2196//1798 2190//1792
f 2195//1794 2199//1799 2198//1800 2194//1795
f 2192//1796 2194//1795 2191//1791 2189//1742
f 2194//1795 2198//1800 2197//1797 2191//1791
f 2157//1766 2158//1765 2136//1759 2135//609
f 2161//1770 2162//1769 2140//1756 2139//1760
f 2158//1765 2161//1770 2139//1760 2136//1759
f 2152//1742 2189//1742 2188//1743 2151//1743
f 2156//1762 2193//1793 2192//1796 2155//1746
f 2155//1746 2192//1796 2189//1742 2152//1742
f 2132//1756 2148//1761 2146//1761 2130//1757
f 2140//1756 2156//1762 2154//1762 2138//1756
f 2138//1756 2154//1762 2148//1761 2132//1756
f 2196//1798 2197//1797 2177//1783 2176//1784
f 2164//1768 2195//1794 2193//1793 2162//1769
f 2198//1800 2199//1799 2185//1786 2184//1785
f 2197//1797 2198//1800 2184//1785 2177//1783
f 2185//1786 2199//1799 2195//1794 2164//1768
f 2162//1769 2193//1793 2156//1762 2140//1756
f 2125//1754 2126//1753 2104//1726 2103//1725
f 2129//1758 2130//1757 2109//1728 2108//1727
f 2126//1753 2129//1758 2108//1727 2104//1726
f 2120//1742 2142//1742 2141//1743 2119//1743
f 2124//1745 2146//1761 2145//1746 2123//1746
f 2123//1746 2145//1746 2142//1742 2120//1742
f 2130//1757 2146//1761 2124//1745 2109//1728
f 2202//609 2203//609 2201//610 2200//1801
f 2206//609 2207//664 2205//609 2204//619
f 2210//1802 2211//1803 2209//651 2208//609
f 2214//1804 2215//1805 2213//1806 2212//1807
f 2208//609 2209//651 2203//609 2202//609
f 2212//1807 2213//1806 2207//664 2206//609
f 2203//609 2206//609 2204//619 2201//610
f 2211//1803 2214//1804 2212//1807 2209//651
f 2209//651 2212//1807 2206//609 2203//609
f 2218//1808 2219//1809 2217//621 2216//609
f 2222//1810 2223//1811 2221//1812 2220//1813
f 2226//1814 2227//1815 2225//1816 2224//1817
f 2234//1818 2235//1819 2233//1820 2232//1821
f 2233//1820 2235//1819 2231//1822 2230//1823
f 2224//1817 2225//1816 2219//1809 2218//1808
f 2230//1823 2231//1822 2223//1811 2222//1810
f 2219//1809 2222//1810 2220//1813 2217//621
f 2227//1815 2233//1820 2230//1823 2225//1816
f 2225//1816 2230//1823 2222//1810 2219//1809
f 2238//1824 2240//1825 2237//1826 2236//1827
f 2243//1828 2244//1829 2242//1830 2241//1831
f 2250//1832 2251//1833 2249//1834 2248//1835
f 2247//1836 2251//1833 2250//1832 2246//1837
f 2249//1834 2251//1833 2247//1836 2245//1838
f 2254//1771 2255//1839 2253//1840 2252//1771
f 2253//1840 2257//1841 2256//1831 2252//1771
f 2260//1842 2261//1843 2259//1844 2258//1845
f 2240//1825 2261//1843 2260//1842 2239//1846
f 2259//1844 2261//1843 2240//1825 2238//1824
f 2242//1830 2264//1847 2263//1771 2241//1831
f 2263//1771 2264//1847 2255//1839 2254//1771
f 2248//1835 2249//1834 2240//1825 2239//1846
f 2240//1825 2249//1834 2245//1838 2237//1826
f 2244//1829 2250//1832 2248//1835 2242//1830
f 2255//1839 2260//1842 2258//1845 2253//1840
f 2258//1845 2262//1848 2257//1841 2253//1840
f 2264//1847 2265//1849 2260//1842 2255//1839
f 2248//1835 2265//1849 2264//1847 2242//1830
f 2260//1842 2265//1849 2248//1835 2239//1846
f 2271//1850 2272//1851 2270//1852 2269//1853
f 2268//1854 2272//1851 2271//1850 2267//1855
f 2270//1852 2272//1851 2268//1854 2266//1856
f 2275//1857 2276//1858 2274//1859 2273//1860
f 2280//1771 2281//1861 2279//1862 2278//1863
f 2278//1863 2279//1862 2268//1854 2267//1855
f 2282//1864 2283//1865 2276//1858 2275//1857
f 2268//1854 2275//1857 2273//1860 2266//1856
f 2273//1860 2277//1866 2270//1852 2266//1856
f 2281//1861 2284//1867 2282//1864 2279//1862
f 2279//1862 2282//1864 2275//1857 2268//1854
f 2236//1827 2237//1826 2211//1803 2210//1802
f 2245//1838 2247//1836 2215//1805 2214//1804
f 2237//1826 2245//1838 2214//1804 2211//1803
f 2274//1859 2276//1858 2227//1815 2226//1814
f 2229//1868 2281//1861 2280//1771 2228//1771
f 2233//1820 2283//1865 2282//1864 2232//1821
f 2282//1864 2284//1867 2234//1818 2232//1821
f 2234//1818 2284//1867 2281//1861 2229//1868
f 2276//1858 2283//1865 2233//1820 2227//1815
f 2207//664 2218//1808 2216//609 2205//609
f 2215//1805 2226//1814 2224//1817 2213//1806
f 2213//1806 2224//1817 2218//1808 2207//664
f 2269//1853 2270//1852 2244//1829 2243//1828
f 2273//1860 2274//1859 2247//1836 2246//1837
f 2250//1832 2277//1866 2273//1860 2246//1837
f 2270//1852 2277//1866 2250//1832 2244//1829
f 2247//1836 2274//1859 2226//1814 2215//1805
f 2287//1869 2288//1870 2286//1871 2285//1872
f 2293//1873 2294//1874 2292//1875 2291//1876
f 2292//1875 2294//1874 2290//1877 2289//1878
f 2299//1771 2300//1879 2298//1880 2297//1771
f 2296//1881 2300//1879 2299//1771 2295//1771
f 2303//1882 2304//1883 2302//1884 2301//1885
f 2302//1884 2306//1886 2305//1887 2301//1885
f 2305//1887 2307//1888 2303//1882 2301//1885
f 2310//1771 2311//1889 2309//1890 2308//1771
f 2302//1884 2304//1883 2288//1870 2287//1869
f 2292//1875 2313//1891 2312//1892 2291//1876
f 2312//1892 2314//1893 2293//1873 2291//1876
f 2308//1771 2309//1890 2296//1881 2295//1771
f 2288//1870 2292//1875 2289//1878 2286//1871
f 2312//1892 2313//1891 2304//1883 2303//1882
f 2300//1879 2307//1888 2305//1887 2298//1880
f 2303//1882 2307//1888 2300//1879 2296//1881
f 2311//1889 2314//1893 2312//1892 2309//1890
f 2309//1890 2312//1892 2303//1882 2296//1881
f 2304//1883 2313//1891 2292//1875 2288//1870
f 2317//1771 2318//1894 2316//1895 2315//1771
f 2324//1896 2325//1897 2323//1898 2322//1899
f 2321//1900 2325//1897 2324//1896 2320//1901
f 2323//1898 2325//1897 2321//1900 2319//1902
f 2328//1771 2329//1903 2327//1904 2326//1771
f 2327//1904 2331//1905 2330//1771 2326//1771
f 2334//1906 2335//1907 2333//1908 2332//1909
f 2316//1895 2338//1910 2337//1771 2315//1771
f 2330//1771 2331//1905 2318//1894 2317//1771
f 2332//1909 2333//1908 2321//1900 2320//1901
f 2324//1896 2336//1911 2332//1909 2320//1901
f 2318//1894 2324//1896 2322//1899 2316//1895
f 2329//1903 2334//1906 2332//1909 2327//1904
f 2332//1909 2336//1911 2331//1905 2327//1904
f 2331//1905 2336//1911 2324//1896 2318//1894
f 2322//1899 2339//1912 2338//1910 2316//1895
f 2337//1771 2338//1910 2311//1889 2310//1771
f 2322//1899 2323//1898 2294//1874 2293//1873
f 2294//1874 2323//1898 2319//1902 2290//1877
f 2338//1910 2339//1912 2314//1893 2311//1889
f 2314//1893 2339//1912 2322//1899 2293//1873
f 2342//1913 2343//1914 2345//1915 2344//1913
f 2341//1916 2343//1914 2342//1913 2340//1913
f 2347//1917 2348//1918 2350//1919 2349//1920
f 2357//1921 2358//1922 2356//1923 2354//1924
f 2359//1913 2360//1925 2362//1926 2361//1913
f 2363//1927 2364//1928 2366//1929 2365//1930
f 2366//1929 2369//1931 2368//1932 2365//1930
f 2367//1933 2369//1931 2366//1929 2364//1928
f 2350//1919 2356//1923 2355//1934 2349//1920
f 2354//1924 2356//1923 2350//1919 2348//1918
f 2352//1935 2360//1925 2359//1913 2351//1913
f 2344//1913 2345//1915 2352//1935 2351//1913
f 2355//1934 2356//1923 2364//1928 2363//1927
f 2358//1922 2367//1933 2364//1928 2356//1923
f 2343//1914 2347//1917 2349//1920 2345//1915
f 2346//1936 2347//1917 2343//1914 2341//1916
f 2360//1925 2363//1927 2365//1930 2362//1926
f 2345//1915 2349//1920 2353//1937 2352//1935
f 2353//1937 2363//1927 2360//1925 2352//1935
f 2355//1934 2363//1927 2353//1937 2349//1920
f 2372//1913 2373//1938 2375//1939 2374//1913
f 2371//1940 2373//1938 2372//1913 2370//1913
f 2377//1941 2378//1942 2380//1943 2379//1944
f 2381//1913 2382//1945 2384//1946 2383//1913
f 2374//1913 2375//1939 2382//1945 2381//1913
f 2373//1938 2377//1941 2379//1944 2375//1939
f 2376//1947 2377//1941 2373//1938 2371//1940
f 2382//1945 2385//1948 2386//1949 2384//1946
f 2375//1939 2379//1944 2385//1948 2382//1945
f 2389//1950 2390//1951 2388//1952 2387//1953
f 2393//1954 2394//1955 2392//1956 2391//1957
f 2397//1958 2398//1959 2396//609 2395//609
f 2401//609 2402//609 2400//1960 2399//609
f 2395//609 2396//609 2390//1951 2389//1950
f 2399//609 2400//1960 2394//1955 2393//1954
f 2390//1951 2393//1954 2391//1957 2388//1952
f 2398//1959 2401//609 2399//609 2396//609
f 2396//609 2399//609 2393//1954 2390//1951
f 2406//1961 2407//1962 2405//1963 2403//1964
f 2410//1965 2411//1966 2413//1967 2412//1968
f 2414//1969 2415//1970 2413//1967 2411//1966
f 2418//609 2419//1971 2417//1972 2416//1973
f 2422//1974 2423//1975 2421//1976 2420//1977
f 2416//1973 2417//1972 2407//1962 2406//1961
f 2420//1977 2421//1976 2415//1970 2414//1969
f 2404//1978 2405//1963 2411//1966 2410//1965
f 2407//1962 2414//1969 2411//1966 2405//1963
f 2419//1971 2422//1974 2420//1977 2417//1972
f 2417//1972 2420//1977 2414//1969 2407//1962
f 2387//1953 2388//1952 2358//1922 2357//1921
f 2391//1957 2392//1956 2369//1931 2367//1933
f 2388//1952 2391//1957 2367//1933 2358//1922
f 2380//1943 2405//1963 2404//1978 2379//1944
f 2403//1964 2405//1963 2380//1943 2378//1942
f 2384//1946 2409//1979 2408//1913 2383//1913
f 2410//1965 2412//1968 2386//1949 2385//1948
f 2386//1949 2412//1968 2409//1979 2384//1946
f 2404//1978 2410//1965 2385//1948 2379//1944
f 2361//1913 2362//1926 2371//1940 2370//1913
f 2368//1932 2369//1931 2378//1942 2377//1941
f 2368//1932 2377//1941 2376//1947 2365//1930
f 2362//1926 2365//1930 2376//1947 2371//1940
f 2394//1955 2406//1961 2403//1964 2392//1956
f 2402//609 2418//609 2416//1973 2400//1960
f 2400//1960 2416//1973 2406//1961 2394//1955
f 2392//1956 2403//1964 2378//1942 2369//1931
f 2424//1913 2425//1980 2427//1981 2426//1913
f 2427//1981 2429//1982 2428//1913 2426//1913
f 2433//1983 2434//1984 2436//1985 2435//1986
f 2431//1987 2434//1984 2433//1983 2430//1988
f 2433//1983 2435//1986 2432//1989 2430//1988
f 2437//1990 2438//1991 2440//1992 2439//1993
f 2446//1994 2447//1995 2445//1996 2444//1997
f 2449//1998 2450//1999 2452//2000 2451//2001
f 2453//2002 2454//2003 2452//2000 2450//1999
f 2444//1997 2445//1996 2436//1985 2434//1984
f 2442//2004 2450//1999 2449//1998 2441//2005
f 2449//1998 2451//2001 2443//2006 2441//2005
f 2428//1913 2429//1982 2438//1991 2437//1990
f 2435//1986 2436//1985 2442//2004 2441//2005
f 2447//1995 2453//2002 2450//1999 2445//1996
f 2425//1980 2430//1988 2432//1989 2427//1981
f 2432//1989 2435//1986 2429//1982 2427//1981
f 2438//1991 2441//2005 2443//2006 2440//1992
f 2429//1982 2435//1986 2441//2005 2438//1991
f 2443//2006 2451//2001 2448//2007 2440//1992
f 2445//1996 2450//1999 2442//2004 2436//1985
f 2457//2008 2458//2009 2460//2010 2459//2011
f 2464//2012 2465//2013 2467//2014 2466//2015
f 2462//2016 2465//2013 2464//2012 2461//2017
f 2464//2012 2466//2015 2463//2018 2461//2017
f 2470//1913 2471//2019 2473//2020 2472//1913
f 2469//2021 2471//2019 2470//1913 2468//1913
f 2475//2022 2476//2023 2478//2024 2477//2025
f 2456//2026 2458//2009 2457//2008 2455//2027
f 2459//2011 2460//2010 2469//2021 2468//1913
f 2466//2015 2467//2014 2476//2023 2475//2022
f 2466//2015 2475//2022 2474//2028 2463//2018
f 2458//2009 2461//2017 2463//2018 2460//2010
f 2471//2019 2475//2022 2477//2025 2473//2020
f 2474//2028 2475//2022 2471//2019 2469//2021
f 2460//2010 2463//2018 2474//2028 2469//2021
f 2439//1993 2440//1992 2456//2026 2455//2027
f 2451//2001 2452//2000 2462//2016 2461//2017
f 2454//2003 2465//2013 2462//2016 2452//2000
f 2448//2007 2451//2001 2461//2017 2458//2009
f 2448//2007 2458//2009 2456//2026 2440//1992
f 2297//1771 2298//1880 2229//1868 2228//1771
f 2223//1811 2287//1869 2285//1872 2221//1812
f 2305//1887 2306//1886 2235//1819 2234//1818
f 2235//1819 2306//1886 2302//1884 2231//1822
f 2298//1880 2305//1887 2234//1818 2229//1868
f 2231//1822 2302//1884 2287//1869 2223//1811
f 2408//1913 2409//1979 2425//1980 2424//1913
f 2412//1968 2413//1967 2431//1987 2430//1988
f 2415//1970 2434//1984 2431//1987 2413//1967
f 2423//1975 2446//1994 2444//1997 2421//1976
f 2409//1979 2412//1968 2430//1988 2425//1980
f 2421//1976 2444//1997 2434//1984 2415//1970
f 2200//1801 2201//610 1974//1627 1973//1626
f 2204//619 2205//609 1978//1631 1977//1630
f 2201//610 2204//619 1977//1630 1974//1627
f 2216//609 2217//621 1991//609 1990//616
f 2220//1813 2221//1812 1995//609 1994//609
f 2217//621 2220//1813 1994//609 1991//609
f 2205//609 2216//609 1990//616 1978//1631
f 2285//1872 2286//1871 2058//1693 2057//651
f 2289//1878 2290//1877 2062//1695 2061//1694
f 2286//1871 2289//1878 2061//1694 2058//1693
f 2319//1902 2321//1900 2074//1702 2073//1701
f 2079//1706 2335//1907 2334//1906 2078//2029
f 2333//1908 2335//1907 2079//1706 2077//1705
f 2321//1900 2333//1908 2077//1705 2074//1702
f 2290//1877 2319//1902 2073//1701 2062//1695
f 2221//1812 2285//1872 2057//651 1995//609
f 2166//1773 2480//2030 2479//1771 2165//1771
f 2172//1777 2481//2031 2480//2030 2166//1773
f 1908//1574 1909//1573 2097//1732 2096//1731
f 1913//1580 1914//1581 2100//1722 2099//1721
f 1918//1578 2103//1725 2100//1722 1914//1581
f 1909//1573 1913//1580 2099//1721 2097//1732
f 2038//1683 2127//1751 2125//1754 2036//1684
f 2046//609 2135//609 2133//619 2044//1689
f 2044//1689 2133//619 2127//1751 2038//1683
f 2070//1700 2159//1763 2157//1766 2068//651
f 2172//1777 2173//1776 2079//1706 2078//2029
f 2079//1706 2173//1776 2169//1780 2076//1707
f 2076//1707 2169//1780 2159//1763 2070//1700
f 2068//651 2157//1766 2135//609 2046//609
f 2036//1684 2125//1754 2103//1725 1918//1578
f 2479//1771 2480//2030 2329//1903 2328//1771
f 2480//2030 2481//2031 2334//1906 2329//1903
f 2472//1913 2473//2020 2483//2032 2482//1913
f 2473//2020 2477//2025 2484//2033 2483//2032
f 2334//1906 2481//2031 2172//1777 2078//2029
f 2487//2034 2488//2035 2486//2036 2485//2037
f 2491//2038 2492//2039 2490//2040 2489//2041
f 2497//530 2498//2042 2496//2043 2495//530
f 2493//530 2495//530 2496//2043 2494//2044
f 2501//2045 2502//2046 2500//2047 2499//2048
f 2501//2045 2504//2049 2505//2050 2502//2046
f 2503//2051 2504//2049 2501//2045 2499//2048
f 2512//2052 2513//2053 2511//2054 2510//2055
f 2511//2054 2513//2053 2509//2056 2508//2057
f 2500//2047 2502//2046 2488//2035 2487//2034
f 2508//2057 2509//2056 2492//2039 2491//2038
f 2506//530 2507//2058 2498//2042 2497//530
f 2488//2035 2491//2038 2489//2041 2486//2036
f 2510//2055 2511//2054 2505//2050 2504//2049
f 2505//2050 2511//2054 2508//2057 2502//2046
f 2498//2042 2504//2049 2503//2051 2496//2043
f 2494//2044 2496//2043 2503//2051 2499//2048
f 2507//2058 2510//2055 2504//2049 2498//2042
f 2502//2046 2508//2057 2491//2038 2488//2035
f 2516//2059 2517//2060 2515//609 2514//2061
f 2520//2062 2521//609 2519//2063 2518//609
f 2524//2064 2525//2065 2523//2066 2522//2067
f 2528//2068 2529//2069 2527//2070 2526//2071
f 2522//2067 2523//2066 2517//2060 2516//2059
f 2526//2071 2527//2070 2521//609 2520//2062
f 2517//2060 2520//2062 2518//609 2515//609
f 2525//2065 2528//2068 2526//2071 2523//2066
f 2523//2066 2526//2071 2520//2062 2517//2060
f 2532//550 2533//2072 2531//2073 2530//530
f 2533//2072 2535//2074 2534//2075 2531//2073
f 2542//2076 2543//2077 2541//2078 2540//2079
f 2537//2080 2540//2079 2541//2078 2538//2081
f 2541//2078 2543//2077 2539//2082 2538//2081
f 2546//2083 2547//2084 2545//2085 2544//2086
f 2551//530 2552//2087 2550//2088 2549//530
f 2558//2089 2559//2090 2557//2091 2556//2092
f 2553//2093 2556//2092 2557//2091 2554//2094
f 2557//2091 2559//2090 2555//2095 2554//2094
f 2551//530 2560//530 2561//2096 2552//2087
f 2549//530 2550//2088 2543//2077 2542//2076
f 2553//2093 2554//2094 2547//2084 2546//2083
f 2548//2097 2556//2092 2553//2093 2546//2083
f 2539//2082 2546//2083 2544//2086 2538//2081
f 2539//2082 2543//2077 2548//2097 2546//2083
f 2552//2087 2558//2089 2556//2092 2550//2088
f 2550//2088 2556//2092 2548//2097 2543//2077
f 2552//2087 2561//2096 2562//2098 2558//2089
f 2506//530 2530//530 2531//2073 2507//2058
f 2512//2052 2535//2074 2536//2099 2513//2053
f 2534//2075 2535//2074 2512//2052 2510//2055
f 2507//2058 2531//2073 2534//2075 2510//2055
f 2545//2085 2547//2084 2525//2065 2524//2064
f 2554//2094 2555//2095 2529//2069 2528//2068
f 2547//2084 2554//2094 2528//2068 2525//2065
f 2492//2039 2516//2059 2514//2061 2490//2040
f 2513//2053 2524//2064 2522//2067 2509//2056
f 2509//2056 2522//2067 2516//2059 2492//2039
f 2537//2080 2538//2081 2533//2072 2532//550
f 2544//2086 2545//2085 2536//2099 2535//2074
f 2538//2081 2544//2086 2535//2074 2533//2072
f 2536//2099 2545//2085 2524//2064 2513//2053
f 2565//609 2566//609 2564//2100 2563//2101
f 2569//2102 2570//2103 2568//2104 2567//2105
f 2573//2106 2574//2107 2572//2108 2571//2109
f 2577//2110 2578//2111 2576//609 2575//609
f 2571//2109 2572//2108 2566//609 2565//609
f 2575//609 2576//609 2570//2103 2569//2102
f 2566//609 2569//2102 2567//2105 2564//2100
f 2574//2107 2577//2110 2575//609 2572//2108
f 2572//2108 2575//609 2569//2102 2566//609
f 2581//2112 2582//2113 2580//2114 2579//2115
f 2586//2116 2587//2117 2585//2118 2583//2119
f 2590//609 2591//609 2589//2120 2588//2121
f 2594//2122 2595//2123 2593//2124 2592//2125
f 2588//2121 2589//2120 2582//2113 2581//2112
f 2592//2125 2593//2124 2587//2117 2586//2116
f 2582//2113 2586//2116 2583//2119 2580//2114
f 2591//609 2594//2122 2592//2125 2589//2120
f 2589//2120 2592//2125 2586//2116 2582//2113
f 2599//2126 2600//2127 2597//2128 2596//2129
f 2603//2130 2604//2131 2602//2132 2601//2133
f 2607//530 2608//2134 2606//2135 2605//530
f 2607//530 2609//530 2610//2136 2608//2134
f 2613//2137 2614//2138 2612//2139 2611//2140
f 2618//530 2619//2141 2617//2142 2616//530
f 2625//2143 2626//2144 2624//2145 2623//2146
f 2620//2147 2623//2146 2624//2145 2621//2148
f 2624//2145 2626//2144 2622//2149 2621//2148
f 2598//2150 2611//2140 2612//2139 2599//2126
f 2612//2139 2614//2138 2600//2127 2599//2126
f 2621//2148 2622//2149 2604//2131 2603//2130
f 2616//530 2617//2142 2610//2136 2609//530
f 2600//2127 2603//2130 2601//2133 2597//2128
f 2620//2147 2621//2148 2614//2138 2613//2137
f 2615//2151 2623//2146 2620//2147 2613//2137
f 2608//2134 2613//2137 2611//2140 2606//2135
f 2608//2134 2610//2136 2615//2151 2613//2137
f 2619//2141 2625//2143 2623//2146 2617//2142
f 2617//2142 2623//2146 2615//2151 2610//2136
f 2614//2138 2621//2148 2603//2130 2600//2127
f 2629//2152 2630//2153 2628//2154 2627//2155
f 2633//2156 2634//2157 2632//609 2631//609
f 2641//2158 2642//2159 2640//2160 2639//2161
f 2640//2160 2642//2159 2638//2162 2637//2163
f 2645//2164 2646//2165 2644//2166 2643//2167
f 2637//2163 2638//2162 2630//2153 2629//2152
f 2643//2167 2644//2166 2634//2157 2633//2156
f 2630//2153 2633//2156 2631//609 2628//2154
f 2642//2159 2645//2164 2643//2167 2638//2162
f 2638//2162 2643//2167 2633//2156 2630//2153
f 2596//2129 2597//2128 2574//2107 2573//2106
f 2601//2133 2602//2132 2578//2111 2577//2110
f 2597//2128 2601//2133 2577//2110 2574//2107
f 2627//2155 2628//2154 2591//609 2590//609
f 2631//609 2632//609 2595//2123 2594//2122
f 2628//2154 2631//609 2594//2122 2591//609
f 2570//2103 2581//2112 2579//2115 2568//2104
f 2578//2111 2590//609 2588//2121 2576//609
f 2576//609 2588//2121 2581//2112 2570//2103
f 2635//530 2636//2168 2619//2141 2618//530
f 2604//2131 2629//2152 2627//2155 2602//2132
f 2639//2161 2640//2160 2626//2144 2625//2143
f 2626//2144 2640//2160 2637//2163 2622//2149
f 2636//2168 2639//2161 2625//2143 2619//2141
f 2622//2149 2637//2163 2629//2152 2604//2131
f 2602//2132 2627//2155 2590//609 2578//2111
f 2649//530 2650//2169 2648//2170 2647//530
f 2658//530 2659//2171 2657//2172 2656//530
f 2654//530 2656//530 2657//2172 2655//2173
f 2662//2174 2663//2175 2661//2176 2660//2177
f 2662//2174 2665//2178 2666//2179 2663//2175
f 2664//2180 2665//2178 2662//2174 2660//2177
f 2654//530 2655//2173 2650//2169 2649//530
f 2660//2177 2661//2176 2653//2181 2652//2182
f 2650//2169 2652//2182 2651//2183 2648//2170
f 2659//2171 2665//2178 2664//2180 2657//2172
f 2655//2173 2657//2172 2664//2180 2660//2177
f 2655//2173 2660//2177 2652//2182 2650//2169
f 2635//530 2647//530 2648//2170 2636//2168
f 2641//2158 2652//2182 2653//2181 2642//2159
f 2651//2183 2652//2182 2641//2158 2639//2161
f 2661//2176 2663//2175 2646//2165 2645//2164
f 2636//2168 2648//2170 2651//2183 2639//2161
f 2653//2181 2661//2176 2645//2164 2642//2159
f 2521//609 2565//609 2563//2101 2519//2063
f 2529//2069 2573//2106 2571//2109 2527//2070
f 2527//2070 2571//2109 2565//609 2521//609
f 2605//530 2606//2135 2561//2096 2560//530
f 2598//2150 2599//2126 2559//2090 2558//2089
f 2559//2090 2599//2126 2596//2129 2555//2095
f 2606//2135 2611//2140 2562//2098 2561//2096
f 2562//2098 2611//2140 2598//2150 2558//2089
f 2555//2095 2596//2129 2573//2106 2529//2069
f 2667//1913 2668//2184 2670//2185 2669//2186
f 2671//2187 2672//2188 2674//2189 2673//2190
f 2674//2189 2677//2191 2676//2192 2673//2190
f 2675//2193 2677//2191 2674//2189 2672//2188
f 2678//2194 2679//2195 2681//2196 2680//2197
f 2681//2196 2684//2198 2683//2199 2680//2197
f 2682//2200 2684//2198 2681//2196 2679//2195
f 2686//2201 2687//2202 2689//2203 2688//2204
f 2692//2205 2693//2206 2691//2207 2690//2208
f 2696//2209 2697//2210 2695//2211 2694//2212
f 2690//2208 2691//2207 2677//2191 2675//2193
f 2694//2212 2695//2211 2689//2203 2687//2202
f 2669//2186 2670//2185 2679//2195 2678//2194
f 2676//2192 2677//2191 2687//2202 2686//2201
f 2676//2192 2686//2201 2685//2213 2673//2190
f 2693//2206 2696//2209 2694//2212 2691//2207
f 2668//2184 2671//2187 2673//2190 2670//2185
f 2682//2200 2686//2201 2688//2204 2684//2198
f 2685//2213 2686//2201 2682//2200 2679//2195
f 2670//2185 2673//2190 2685//2213 2679//2195
f 2691//2207 2694//2212 2687//2202 2677//2191
f 2703//2214 2705//2215 2704//1743 2702//2216
f 2707//2217 2709//2218 2708//2219 2706//2220
f 2699//2221 2703//2214 2702//2216 2698//2222
f 2701//2223 2707//2217 2706//2220 2700//2224
f 2706//2220 2708//2219 2705//2215 2703//2214
f 2700//2224 2706//2220 2703//2214 2699//2221
f 2712//2225 2713//1759 2711//1759 2710//609
f 2716//1760 2717//1756 2715//1756 2714//1760
f 2720//2226 2721//2227 2719//2228 2718//2229
f 2724//2230 2725//2231 2723//1756 2722//2232
f 2718//2229 2719//2228 2713//1759 2712//2225
f 2722//2232 2723//1756 2717//1756 2716//1760
f 2713//1759 2716//1760 2714//1760 2711//1759
f 2721//2227 2724//2230 2722//2232 2719//2228
f 2719//2228 2722//2232 2716//1760 2713//1759
f 2727//1742 2729//1742 2728//1743 2726//1743
f 2731//1762 2733//1762 2732//1746 2730//1746
f 2735//1742 2737//1742 2736//1743 2734//1743
f 2739//1762 2741//1762 2740//1746 2738//1746
f 2729//1742 2735//1742 2734//1743 2728//1743
f 2733//1762 2739//1762 2738//1746 2732//1746
f 2730//1746 2732//1746 2729//1742 2727//1742
f 2738//1746 2740//1746 2737//1742 2735//1742
f 2732//1746 2738//1746 2735//1742 2729//1742
f 2710//609 2711//1759 2693//2206 2692//2205
f 2714//1760 2715//1756 2697//2210 2696//2209
f 2711//1759 2714//1760 2696//2209 2693//2206
f 2705//2215 2727//1742 2726//1743 2704//1743
f 2709//2218 2731//1762 2730//1746 2708//2219
f 2708//2219 2730//1746 2727//1742 2705//2215
f 2683//2199 2684//2198 2699//2221 2698//2222
f 2688//2204 2689//2203 2701//2223 2700//2224
f 2697//2210 2709//2218 2707//2217 2695//2211
f 2684//2198 2688//2204 2700//2224 2699//2221
f 2695//2211 2707//2217 2701//2223 2689//2203
f 2717//1756 2733//1762 2731//1762 2715//1756
f 2725//2231 2741//1762 2739//1762 2723//1756
f 2723//1756 2739//1762 2733//1762 2717//1756
f 2715//1756 2731//1762 2709//2218 2697//2210
f 2748//2233 2749//2234 2747//2235 2746//2236
f 2747//2235 2749//2234 2745//2237 2744//2238
f 2753//2239 2754//2240 2751//2241 2750//2242
f 2757//530 2758//2243 2756//2244 2755//530
f 2763//530 2764//2245 2762//2246 2761//530
f 2763//530 2765//2247 2766//2248 2764//2245
f 2769//2249 2770//2250 2768//2251 2767//2252
f 2742//530 2755//530 2756//2244 2743//2253
f 2759//2254 2760//2255 2748//2233 2746//2236
f 2752//2256 2767//2252 2768//2251 2753//2239
f 2768//2251 2770//2250 2754//2240 2753//2239
f 2761//530 2762//2246 2758//2243 2757//530
f 2752//2256 2753//2239 2749//2234 2748//2233
f 2749//2234 2753//2239 2750//2242 2745//2237
f 2758//2243 2760//2255 2759//2254 2756//2244
f 2764//2245 2769//2249 2767//2252 2762//2246
f 2764//2245 2766//2248 2771//2257 2769//2249
f 2762//2246 2767//2252 2760//2255 2758//2243
f 2743//2253 2756//2244 2759//2254 2746//2236
f 2760//2255 2767//2252 2752//2256 2748//2233
f 2773//1742 2775//2258 2774//1743 2772//1743
f 2777//2259 2779//2260 2778//2261 2776//1746
f 2781//2262 2783//2263 2782//2264 2780//2265
f 2775//2258 2781//2262 2780//2265 2774//1743
f 2779//2260 2785//2266 2784//2267 2778//2261
f 2776//1746 2778//2261 2775//2258 2773//1742
f 2784//2267 2786//2268 2783//2263 2781//2262
f 2778//2261 2784//2267 2781//2262 2775//2258
f 2782//2264 2783//2263 2766//2248 2765//2247
f 2754//2240 2779//2260 2777//2259 2751//2241
f 2784//2267 2785//2266 2770//2250 2769//2249
f 2771//2257 2786//2268 2784//2267 2769//2249
f 2783//2263 2786//2268 2771//2257 2766//2248
f 2770//2250 2785//2266 2779//2260 2754//2240
f 2744//2238 2745//2237 2721//2227 2720//2226
f 2750//2242 2751//2241 2725//2231 2724//2230
f 2745//2237 2750//2242 2724//2230 2721//2227
f 2737//1742 2773//1742 2772//1743 2736//1743
f 2741//1762 2777//2259 2776//1746 2740//1746
f 2740//1746 2776//1746 2773//1742 2737//1742
f 2751//2241 2777//2259 2741//1762 2725//2231
f 2584//2269 2585//2118 2672//2188 2671//2187
f 2587//2117 2675//2193 2672//2188 2585//2118
f 2595//2123 2692//2205 2690//2208 2593//2124
f 2593//2124 2690//2208 2675//2193 2587//2117
f 2634//2157 2712//2225 2710//609 2632//609
f 2646//2165 2720//2226 2718//2229 2644//2166
f 2644//2166 2718//2229 2712//2225 2634//2157
f 2632//609 2710//609 2692//2205 2595//2123
f 2742//530 2743//2253 2659//2171 2658//530
f 2746//2236 2747//2235 2666//2179 2665//2178
f 2666//2179 2747//2235 2744//2238 2663//2175
f 2743//2253 2746//2236 2665//2178 2659//2171
f 2663//2175 2744//2238 2720//2226 2646//2165
f 2485//2037 2486//2036 2398//1959 2397//1958
f 2489//2041 2490//2040 2402//609 2401//609
f 2486//2036 2489//2041 2401//609 2398//1959
f 2514//2061 2515//609 2419//1971 2418//609
f 2518//609 2519//2063 2423//1975 2422//1974
f 2515//609 2518//609 2422//1974 2419//1971
f 2490//2040 2514//2061 2418//609 2402//609
f 2563//2101 2564//2100 2447//1995 2446//1994
f 2567//2105 2568//2104 2454//2003 2453//2002
f 2564//2100 2567//2105 2453//2002 2447//1995
f 2579//2115 2580//2114 2467//2014 2465//2013
f 2478//2024 2585//2118 2584//2269 2477//2025
f 2583//2119 2585//2118 2478//2024 2476//2023
f 2580//2114 2583//2119 2476//2023 2467//2014
f 2568//2104 2579//2115 2465//2013 2454//2003
f 2519//2063 2563//2101 2446//1994 2423//1975
f 2483//2032 2668//2184 2667//1913 2482//1913
f 2484//2033 2671//2187 2668//2184 2483//2032
f 2584//2269 2671//2187 2484//2033 2477//2025
f 15//33 16//34 1065//907 1064//906
f 35//30 1083//923 1085//926 38//31
f 19//15 20//12 1073//12 1072//916
f 16//34 19//15 1072//916 1065//907
f 15//33 1064//906 1083//923 35//30
f 243//214 1312//1100 1314//177 245//215
f 251//177 1320//177 1322//1102 253//216
f 245//215 1314//177 1320//177 251//177
f 275//232 1348//1123 1350//1126 277//233
f 1364//1140 1365//1139 287//245 286//246
f 287//245 1365//1139 1368//1146 291//242
f 1373//1143 1374//1078 295//249 294//248
f 1368//1146 1373//1143 294//248 291//242
f 277//233 1350//1126 1364//1140 286//246
f 253//216 1322//1102 1348//1123 275//232
f 411//347 412//346 1454//1212 1453//1211
f 408//350 1452//1235 1454//1212 412//346
f 422//360 1466//1219 1469//1222 424//361
f 415//354 416//353 1458//1216 1457//1218
f 408//350 415//354 1457//1218 1452//1235
f 411//347 1453//1211 1466//1219 422//360
f 452//387 1499//1249 1501//1252 454//177
f 460//393 1507//177 1509//1258 462//394
f 454//177 1501//1252 1507//177 460//393
f 424//361 1469//1222 1499//1249 452//387
f 38//31 1085//926 1312//1100 243//214
f 491//426 1597//1333 1599//1336 494//421
f 1605//1344 1606//1343 501//431 500//430
f 1612//1350 1613//102 505//102 504//427
f 1606//1343 1612//1350 504//427 501//431
f 494//421 1599//1336 1605//1344 500//430
f 462//394 1509//1258 1597//1333 491//426
f 521//444 522//448 1954//1612 1953//444
f 524//467 525//468 1959//1614 1958//1613
f 545//465 1973//1626 1971//1629 543//462
f 522//448 524//467 1958//1613 1954//1612
f 543//462 1971//1629 1959//1614 525//468
f 750//647 2202//609 2200//1801 748//648
f 758//650 2210//1802 2208//609 756//609
f 756//609 2208//609 2202//609 750//647
f 2256//1831 2257//1841 793//676 792//675
f 782//666 2238//1824 2236//1827 780//667
f 2258//1845 2259//1844 796//683 795//684
f 799//679 2262//1848 2258//1845 795//684
f 2257//1841 2262//1848 799//679 793//676
f 796//683 2259//1844 2238//1824 782//666
f 780//667 2236//1827 2210//1802 758//650
f 913//781 914//780 2341//1916 2340//1913
f 920//785 921//784 2348//1918 2347//1917
f 920//785 2347//1917 2346//1936 917//788
f 929//794 2357//1921 2354//1924 927//795
f 914//780 917//788 2346//1936 2341//1916
f 927//795 2354//1924 2348//1918 921//784
f 959//609 2389//1950 2387//1953 957//820
f 967//827 2397//1958 2395//609 965//828
f 965//828 2395//609 2389//1950 959//609
f 957//820 2387//1953 2357//1921 929//794
f 748//648 2200//1801 1973//1626 545//465
f 2493//530 2494//2044 1007//860 1006//530
f 1000//855 2487//2034 2485//2037 996//858
f 2499//2048 2500//2047 1010//864 1009//863
f 2494//2044 2499//2048 1009//863 1007//860
f 1010//864 2500//2047 2487//2034 1000//855
f 996//858 2485//2037 2397//1958 967//827
f 11//6 511//434 513//437 13//7
f 9//10 13//7 513//437 509//438
f 3//12 506//444 511//434 11//6
f 18//12 519//444 521//444 20//12
f 29//24 526//449 528//452 31//25
f 31//25 528//452 538//444 40//12
f 18//12 40//12 538//444 519//444
f 9//10 509//438 526//449 29//24
f 49//45 51//44 551//472 549//471
f 43//47 49//45 549//471 546//479
f 59//6 559//434 561//484 61//54
f 57//57 61//54 561//484 557//485
f 70//66 567//491 569//452 72//25
f 57//57 557//485 567//491 70//66
f 43//47 546//479 559//434 59//6
f 88//85 90//84 590//512 588//511
f 90//84 93//87 596//519 590//512
f 111//102 610//530 608//533 109//103
f 111//102 113//102 612//530 610//530
f 124//102 621//530 619//530 122//102
f 122//102 619//530 612//530 113//102
f 109//103 608//533 596//519 93//87
f 124//102 127//102 630//550 621//530
f 51//44 88//85 588//511 551//472
f 132//12 633//444 635//444 134//12
f 143//12 640//444 642//434 145//6
f 143//12 147//12 644//444 640//444
f 134//12 635//444 644//444 147//12
f 150//135 653//568 655//571 152//136
f 161//25 660//452 662//444 163//12
f 159//12 163//12 662//444 658//444
f 152//136 655//571 660//452 161//25
f 150//135 171//156 669//589 653//568
f 145//6 642//434 669//589 171//156
f 132//12 185//12 683//444 633//444
f 222//12 719//444 721//444 224//12
f 295//249 792//675 790//678 293//250
f 336//281 836//710 834//713 334//282
f 336//281 338//285 838//714 836//710
f 350//294 847//720 845//723 348//295
f 348//295 845//723 838//714 338//285
f 369//102 870//530 868//530 367//102
f 382//318 879//744 877//530 380//102
f 378//102 380//102 877//530 875//530
f 378//102 875//530 870//530 369//102
f 358//102 367//102 868//530 856//530
f 358//102 856//530 847//720 350//294
f 414//352 911//778 913//781 416//353
f 159//12 658//444 719//444 222//12
f 440//396 938//830 879//744 382//318
f 790//678 911//778 414//352 293//250
f 72//25 569//452 683//444 185//12
f 334//282 834//713 630//550 127//102
f 3//12 224//12 721//444 506//444
f 467//398 970//831 968//834 465//399
f 476//102 975//530 973//837 474//406
f 476//102 478//102 977//530 975//530
f 474//406 973//837 970//831 467//398
f 489//419 986//530 984//530 487//102
f 505//102 1006//530 1004//530 503//102
f 503//102 1004//530 1001//530 498//419
f 489//419 498//419 1001//530 986//530
f 487//102 984//530 977//530 478//102
f 440//396 465//399 968//834 938//830
f 1015//12 1899//1569 1901//1569 1017//12
f 1026//12 1906//1569 1908//1574 1028//877
f 1026//12 1030//12 1910//1569 1906//1569
f 1017//12 1901//1569 1910//1569 1030//12
f 1033//884 1919//1586 1921//1589 1035//885
f 1047//892 1929//1590 1931//444 1049//12
f 1045//12 1049//12 1931//444 1927//444
f 1058//12 1938//444 1940//444 1060//12
f 1045//12 1927//444 1938//444 1058//12
f 1038//12 1060//12 1940//444 1924//444
f 1069//12 1949//444 1951//1574 1071//914
f 1069//12 1073//12 1953//444 1949//444
f 1071//914 1951//1574 1962//1635 1081//931
f 1035//885 1921//1589 1929//1590 1047//892
f 1033//884 1081//931 1962//1635 1919//1586
f 1115//877 1998//1574 2000//1650 1117//950
f 1113//953 1117//950 2000//1650 1996//1651
f 1126//962 2006//1589 2008//1590 1128//892
f 1113//953 1996//1651 2006//1589 1126//962
f 1128//892 2008//1590 2027//1569 1146//12
f 1038//12 1924//444 1998//1574 1115//877
f 1015//12 1146//12 2027//1569 1899//1569
f 1194//1009 2080//1710 2082//1713 1196//1010
f 1205//1017 2087//1590 2089//1569 1207//12
f 1203//1020 1207//12 2089//1569 2085//1715
f 1196//1010 2082//1713 2087//1590 1205//1017
f 1194//1009 1215//1032 2096//1731 2080//1710
f 2110//1740 2112//1739 1228//1038 1226//1037
f 2117//1743 2119//1743 1236//1045 1234//1045
f 2112//1739 2117//1743 1234//1045 1228//1038
f 1203//1020 2085//1715 2110//1740 1226//1037
f 2141//1743 2143//1743 1260//1045 1258//1045
f 2149//1743 2151//1743 1268//1045 1266//1045
f 2143//1743 2149//1743 1266//1045 1260//1045
f 1287//1078 2167//1771 2165//1771 1285//1078
f 1299//1078 2180//1771 2178//1771 1297//1078
f 2176//1784 2180//1771 1299//1078 1295//1088
f 1297//1078 2178//1771 2167//1771 1287//1078
f 2188//1743 2190//1792 1307//1094 1305//1045
f 2190//1792 2196//1798 1311//1098 1307//1094
f 1311//1098 2196//1798 2176//1784 1295//1088
f 2151//1743 2188//1743 1305//1045 1268//1045
f 2119//1743 2141//1743 1258//1045 1236//1045
f 1363//1135 2243//1828 2241//1831 1361//1078
f 1372//1078 2254//1771 2252//1771 1370//1078
f 2252//1771 2256//1831 1374//1078 1370//1078
f 1377//1078 2263//1771 2254//1771 1372//1078
f 2241//1831 2263//1771 1377//1078 1361//1078
f 1389//1153 2271//1850 2269//1853 1387//1154
f 2267//1855 2271//1850 1389//1153 1385//1156
f 1396//1078 2280//1771 2278//1863 1394//1160
f 1394//1160 2278//1863 2267//1855 1385//1156
f 1387//1154 2269//1853 2243//1828 1363//1135
f 2228//1771 2280//1771 1396//1078 1347//1078
f 1419//1078 2299//1771 2297//1771 1417//1078
f 2295//1771 2299//1771 1419//1078 1415//1078
f 1426//1078 2310//1771 2308//1771 1424//1078
f 1424//1078 2308//1771 2295//1771 1415//1078
f 1437//1078 2317//1771 2315//1771 1435//1078
f 1446//1078 2328//1771 2326//1771 1444//1078
f 2326//1771 2330//1771 1448//1078 1444//1078
f 1448//1078 2330//1771 2317//1771 1437//1078
f 2315//1771 2337//1771 1451//1078 1435//1078
f 1451//1078 2337//1771 2310//1771 1426//1078
f 1460//1216 2342//1913 2344//1913 1462//1216
f 2340//1913 2342//1913 1460//1216 1458//1216
f 1479//1231 2359//1913 2361//1913 1481//1231
f 1462//1216 2344//1913 2351//1913 1465//1231
f 2351//1913 2359//1913 1479//1231 1465//1231
f 1490//1231 2372//1913 2374//1913 1492//1231
f 2370//1913 2372//1913 1490//1231 1488//1231
f 1496//1231 2381//1913 2383//1913 1498//1231
f 1492//1231 2374//1913 2381//1913 1496//1231
f 1481//1231 2361//1913 2370//1913 1488//1231
f 2383//1913 2408//1913 1527//1231 1498//1231
f 1544//1231 2424//1913 2426//1913 1546//1231
f 2426//1913 2428//1913 1548//1231 1546//1231
f 1553//1290 2437//1990 2439//1993 1555//1291
f 1548//1231 2428//1913 2437//1990 1553//1290
f 1577//1315 2457//2008 2459//2011 1579//1316
f 1588//1231 2470//1913 2472//1913 1590//1231
f 2468//1913 2470//1913 1588//1231 1586//1231
f 1579//1316 2459//2011 2468//1913 1586//1231
f 2455//2027 2457//2008 1577//1315 1568//1325
f 1555//1291 2439//1993 2455//2027 1568//1325
f 1417//1078 2297//1771 2228//1771 1347//1078
f 1527//1231 2408//1913 2424//1913 1544//1231
f 1028//877 1908//1574 2096//1731 1215//1032
f 1593//1078 2479//1771 2328//1771 1446//1078
f 1590//1231 2472//1913 2482//1913 1596//1231
f 2165//1771 2479//1771 1593//1078 1285//1078
f 1617//102 2497//530 2495//530 1615//102
f 1613//102 1615//102 2495//530 2493//530
f 1625//102 2506//530 2497//530 1617//102
f 1648//102 2532//550 2530//530 1646//102
f 1660//1380 2542//2076 2540//2079 1658//1381
f 1655//1384 1658//1381 2540//2079 2537//2080
f 1671//102 2551//530 2549//530 1669//102
f 1669//102 2549//530 2542//2076 1660//1380
f 1671//102 1674//102 2560//530 2551//530
f 1655//1384 2537//2080 2532//550 1648//102
f 1625//102 1646//102 2530//530 2506//530
f 1725//102 2607//530 2605//530 1723//102
f 1725//102 1727//102 2609//530 2607//530
f 1738//102 2618//530 2616//530 1736//102
f 1736//102 2616//530 2609//530 1727//102
f 1754//102 2635//530 2618//530 1738//102
f 1765//102 2649//530 2647//530 1763//102
f 1778//419 2658//530 2656//530 1776//419
f 1774//102 1776//419 2656//530 2654//530
f 1774//102 2654//530 2649//530 1765//102
f 1723//102 2605//530 2560//530 1674//102
f 1754//102 1763//102 2647//530 2635//530
f 1787//1231 2667//1913 2669//2186 1789//1491
f 1796//1498 2678//2194 2680//2197 1798//1499
f 2680//2197 2683//2199 1801//1501 1798//1499
f 1789//1491 2669//2186 2678//2194 1796//1498
f 2702//2216 2704//1743 1821//1045 1819//1517
f 2698//2222 2702//2216 1819//1517 1813//1522
f 2726//1743 2728//1743 1845//1045 1843//1045
f 2734//1743 2736//1743 1853//1045 1851//1045
f 2728//1743 2734//1743 1851//1045 1845//1045
f 1801//1501 2683//2199 2698//2222 1813//1522
f 2704//1743 2726//1743 1843//1045 1821//1045
f 1872//102 2757//530 2755//530 1870//102
f 1881//102 2763//530 2761//530 1879//102
f 1881//102 1883//1551 2765//2247 2763//530
f 1879//102 2761//530 2757//530 1872//102
f 1861//419 1870//102 2755//530 2742//530
f 2772//1743 2774//1743 1891//1045 1889//1045
f 2780//2265 2782//2264 1898//1562 1896//1561
f 2774//1743 2780//2265 1896//1561 1891//1045
f 1898//1562 2782//2264 2765//2247 1883//1551
f 2736//1743 2772//1743 1889//1045 1853//1045
f 1861//419 2742//530 2658//530 1778//419
f 2482//1913 2667//1913 1787//1231 1596//1231
f 20//12 521//444 1953//444 1073//12
f 1374//1078 2256//1831 792//675 295//249
f 416//353 913//781 2340//1913 1458//1216
f 1613//102 2493//530 1006//530 505//102
