# Supplementary material
Source: ML conference proceedings conference paper supplement (https://openaccess.thecvf.com/content/WACV2023/html/Plack_Fast_Differentiable_Transient_WACV_2023_paper.html)
Supplement: Supplementary file 2 [file Plack_Fast_Differentiable_Transient_WACV_2023_supplemental.zip › code/samples/wacv/self_supervised/w.obj]

# Blender v3.2.1 OBJ File: 'untitled.blend'
# www.blender.org
v 0.275340 -0.106813 0.336274
v 0.275723 -0.107769 0.328602
v 0.275987 -0.108425 0.315500
v 0.276774 -0.099663 0.339114
v 0.276702 -0.084005 0.349628
v 0.279503 -0.087647 0.342890
v 0.278975 -0.099663 0.328602
v 0.279502 -0.099663 0.315500
v 0.284231 -0.086561 0.328602
v 0.284758 -0.086561 0.315500
v 0.289331 -0.069722 0.338113
v 0.288941 -0.055648 0.349093
v 0.291051 -0.060152 0.342170
v 0.278818 -0.073458 0.351129
v 0.285562 -0.073837 0.342170
v 0.282353 -0.060152 0.352019
v 0.287189 -0.064382 0.346848
v 0.290159 -0.071785 0.328602
v 0.290422 -0.072442 0.315500
v 0.294744 -0.060356 0.328602
v 0.295270 -0.060356 0.315500
v 0.287531 -0.078336 0.328602
v 0.287794 -0.078993 0.315500
v 0.301570 -0.041365 0.336393
v 0.303017 -0.034151 0.339229
v 0.301966 -0.042352 0.328602
v 0.302229 -0.043009 0.315500
v 0.305256 -0.034151 0.328602
v 0.305783 -0.034151 0.315500
v 0.315561 -0.004273 0.338149
v 0.302932 -0.018556 0.349644
v 0.305754 -0.022174 0.342911
v 0.305060 -0.007947 0.351153
v 0.311812 -0.008363 0.342192
v 0.316401 -0.006368 0.328602
v 0.316665 -0.007025 0.315500
v 0.310512 -0.021049 0.328602
v 0.311039 -0.021049 0.315500
v 0.313773 -0.012919 0.328602
v 0.314037 -0.013576 0.315500
v 0.290625 -0.047254 0.350326
v 0.297110 -0.046341 0.341138
v 0.293253 -0.034151 0.351811
v 0.299804 -0.034151 0.345780
v 0.281651 -0.047254 0.355034
v 0.281651 -0.034151 0.356878
v 0.299338 -0.048903 0.328602
v 0.299601 -0.049560 0.315500
v 0.295989 -0.022174 0.352663
v 0.301180 -0.027291 0.348083
v 0.294753 -0.007947 0.356100
v 0.281651 -0.021049 0.357907
v 0.281651 -0.007947 0.358386
v 0.222879 -0.237710 0.336037
v 0.223238 -0.238602 0.328602
v 0.223501 -0.239259 0.315500
v 0.224288 -0.230686 0.338883
v 0.224242 -0.214902 0.349597
v 0.227002 -0.218595 0.342848
v 0.226413 -0.230686 0.328602
v 0.226940 -0.230686 0.315500
v 0.231669 -0.217584 0.328602
v 0.232196 -0.217584 0.315500
v 0.210641 -0.266066 0.338008
v 0.199764 -0.265319 0.349888
v 0.203694 -0.268462 0.342107
v 0.211430 -0.268035 0.328602
v 0.211693 -0.268691 0.315500
v 0.203037 -0.274076 0.328602
v 0.203037 -0.274977 0.315500
v 0.189934 -0.266257 0.350704
v 0.189934 -0.272054 0.341704
v 0.176832 -0.266257 0.350704
v 0.176832 -0.272054 0.341704
v 0.189934 -0.275525 0.328602
v 0.189934 -0.276014 0.315500
v 0.176832 -0.275525 0.328602
v 0.176832 -0.276014 0.315500
v 0.210251 -0.251993 0.349046
v 0.212300 -0.256573 0.342107
v 0.211897 -0.243789 0.350256
v 0.218359 -0.242762 0.340924
v 0.203694 -0.256573 0.351487
v 0.208499 -0.260728 0.346743
v 0.203037 -0.243789 0.354942
v 0.215901 -0.256891 0.328602
v 0.216427 -0.256891 0.315500
v 0.220609 -0.245153 0.328602
v 0.220873 -0.245810 0.315500
v 0.214525 -0.230686 0.351765
v 0.221076 -0.230686 0.345434
v 0.217329 -0.218595 0.352618
v 0.222490 -0.223637 0.347978
v 0.203037 -0.230686 0.356821
v 0.203037 -0.217584 0.357886
v 0.189934 -0.256891 0.355383
v 0.189934 -0.243789 0.357991
v 0.176832 -0.256891 0.355435
v 0.176832 -0.243789 0.358097
v 0.189934 -0.230686 0.358496
v 0.189934 -0.217584 0.358623
v 0.176832 -0.230686 0.358550
v 0.176832 -0.217584 0.358623
v 0.166636 -0.265319 0.349888
v 0.162853 -0.268993 0.342413
v 0.155757 -0.266952 0.338518
v 0.163730 -0.275259 0.328602
v 0.163730 -0.276014 0.315500
v 0.154783 -0.269217 0.328602
v 0.154519 -0.269728 0.315500
v 0.162853 -0.257130 0.351670
v 0.157901 -0.261657 0.347252
v 0.163730 -0.243789 0.355409
v 0.156133 -0.252922 0.349282
v 0.153784 -0.257130 0.342413
v 0.154283 -0.243789 0.350617
v 0.147707 -0.243356 0.341722
v 0.149733 -0.256891 0.328602
v 0.149206 -0.256891 0.315500
v 0.145578 -0.246632 0.328602
v 0.145314 -0.247282 0.315500
v 0.163730 -0.230686 0.357116
v 0.163730 -0.217584 0.358002
v 0.150249 -0.229696 0.351436
v 0.145629 -0.233404 0.346102
v 0.150627 -0.217584 0.354249
v 0.143484 -0.238699 0.337366
v 0.142925 -0.240081 0.328602
v 0.142661 -0.240731 0.315500
v 0.143860 -0.224669 0.348555
v 0.142175 -0.229696 0.341722
v 0.142425 -0.217584 0.349686
v 0.137557 -0.217584 0.341704
v 0.139120 -0.230686 0.328602
v 0.138593 -0.230686 0.315500
v 0.133313 -0.216442 0.329248
v 0.133456 -0.218005 0.315500
v 0.130860 -0.211314 0.325311
v 0.130803 -0.211454 0.315500
v 0.249110 -0.172261 0.336155
v 0.250531 -0.165175 0.338998
v 0.249480 -0.173185 0.328602
v 0.249744 -0.173842 0.315500
v 0.252694 -0.165175 0.328602
v 0.253221 -0.165175 0.315500
v 0.236871 -0.200618 0.338043
v 0.236481 -0.186545 0.349062
v 0.238551 -0.191099 0.342128
v 0.226332 -0.204482 0.351082
v 0.233061 -0.204784 0.342128
v 0.229913 -0.191099 0.351976
v 0.234729 -0.195280 0.346778
v 0.237673 -0.202618 0.328602
v 0.237936 -0.203275 0.315500
v 0.242182 -0.191379 0.328602
v 0.242708 -0.191379 0.315500
v 0.235045 -0.209170 0.328602
v 0.235308 -0.209826 0.315500
v 0.238139 -0.178277 0.350279
v 0.244609 -0.177288 0.340996
v 0.240768 -0.165175 0.351780
v 0.247319 -0.165175 0.345550
v 0.229241 -0.178277 0.354973
v 0.229241 -0.165175 0.356840
v 0.246852 -0.179737 0.328602
v 0.247116 -0.180393 0.315500
v 0.263101 -0.135170 0.338078
v 0.250472 -0.149453 0.349613
v 0.253253 -0.153121 0.342869
v 0.252575 -0.138970 0.351106
v 0.259311 -0.139310 0.342149
v 0.263916 -0.137202 0.328602
v 0.264179 -0.137858 0.315500
v 0.257950 -0.152072 0.328602
v 0.258477 -0.152072 0.315500
v 0.261288 -0.143753 0.328602
v 0.261551 -0.144409 0.315500
v 0.262711 -0.121096 0.349077
v 0.264801 -0.125625 0.342149
v 0.264382 -0.112765 0.350303
v 0.270859 -0.111814 0.341067
v 0.256133 -0.125625 0.351998
v 0.260959 -0.129831 0.346813
v 0.255446 -0.112765 0.355003
v 0.268463 -0.125868 0.328602
v 0.268989 -0.125868 0.315500
v 0.273095 -0.114320 0.328602
v 0.273358 -0.114976 0.315500
v 0.243549 -0.153121 0.352633
v 0.248720 -0.158188 0.348013
v 0.242344 -0.138970 0.356045
v 0.229241 -0.152072 0.357893
v 0.229241 -0.138970 0.358379
v 0.242344 -0.125868 0.357500
v 0.242344 -0.112765 0.358140
v 0.229241 -0.125868 0.358622
v 0.229241 -0.112765 0.358623
v 0.216139 -0.204482 0.356015
v 0.216139 -0.191379 0.357481
v 0.203037 -0.204482 0.358372
v 0.203037 -0.191379 0.358619
v 0.216139 -0.178277 0.358133
v 0.216139 -0.165175 0.358499
v 0.203037 -0.178277 0.358623
v 0.203037 -0.165175 0.358623
v 0.189934 -0.204482 0.358623
v 0.189934 -0.191379 0.358623
v 0.176832 -0.204482 0.358623
v 0.176832 -0.191379 0.358623
v 0.189934 -0.178277 0.358623
v 0.189934 -0.165175 0.358623
v 0.176832 -0.178277 0.358623
v 0.176832 -0.165175 0.358623
v 0.216139 -0.152072 0.358623
v 0.216139 -0.138970 0.358623
v 0.203037 -0.152072 0.358623
v 0.203037 -0.138970 0.358623
v 0.216139 -0.125868 0.358623
v 0.216139 -0.112765 0.358623
v 0.203037 -0.125868 0.358623
v 0.203037 -0.112765 0.358623
v 0.189934 -0.152072 0.358623
v 0.189934 -0.138970 0.358623
v 0.176832 -0.152072 0.358623
v 0.176832 -0.138970 0.358623
v 0.189934 -0.125868 0.358623
v 0.189934 -0.112765 0.358623
v 0.176832 -0.125868 0.358623
v 0.176832 -0.112765 0.358623
v 0.267010 -0.099663 0.351796
v 0.273561 -0.099663 0.345665
v 0.269769 -0.087647 0.352648
v 0.274950 -0.092739 0.348048
v 0.255446 -0.099663 0.356859
v 0.255446 -0.086561 0.357900
v 0.268548 -0.073458 0.356073
v 0.268548 -0.060356 0.357516
v 0.255446 -0.073458 0.358383
v 0.255446 -0.060356 0.358623
v 0.242344 -0.099663 0.358503
v 0.242344 -0.086561 0.358623
v 0.229241 -0.099663 0.358623
v 0.229241 -0.086561 0.358623
v 0.242344 -0.073458 0.358623
v 0.242344 -0.060356 0.358623
v 0.229241 -0.073458 0.358623
v 0.229241 -0.060356 0.358623
v 0.268548 -0.047254 0.358146
v 0.268548 -0.034151 0.358506
v 0.255446 -0.047254 0.358623
v 0.255446 -0.034151 0.358623
v 0.268548 -0.021049 0.358623
v 0.268548 -0.007947 0.358623
v 0.255446 -0.021049 0.358623
v 0.255446 -0.007947 0.358623
v 0.242344 -0.047254 0.358623
v 0.242344 -0.034151 0.358623
v 0.229241 -0.047254 0.358623
v 0.229241 -0.034151 0.358623
v 0.242344 -0.021049 0.358623
v 0.242344 -0.007947 0.358623
v 0.229241 -0.021049 0.358623
v 0.229241 -0.007947 0.358623
v 0.216139 -0.099663 0.358623
v 0.216139 -0.086561 0.358623
v 0.203037 -0.099663 0.358623
v 0.203037 -0.086561 0.358623
v 0.216139 -0.073458 0.358623
v 0.216139 -0.060356 0.358623
v 0.203037 -0.073458 0.358623
v 0.203037 -0.060356 0.358547
v 0.189934 -0.099663 0.358623
v 0.189934 -0.086561 0.358426
v 0.176832 -0.099663 0.358623
v 0.176832 -0.086561 0.358426
v 0.189934 -0.073458 0.357988
v 0.189934 -0.060356 0.357097
v 0.176832 -0.073458 0.357988
v 0.176832 -0.060356 0.357009
v 0.216139 -0.047254 0.358623
v 0.216139 -0.034151 0.358623
v 0.203037 -0.047254 0.358230
v 0.203037 -0.034151 0.357700
v 0.216139 -0.021049 0.358426
v 0.216139 -0.007947 0.357988
v 0.203037 -0.021049 0.356404
v 0.203037 -0.007947 0.354152
v 0.189934 -0.047254 0.355395
v 0.189048 -0.033901 0.352279
v 0.184090 -0.029367 0.347273
v 0.176832 -0.047254 0.355217
v 0.177326 -0.033901 0.351964
v 0.182023 -0.029367 0.347273
v 0.192305 -0.021049 0.351416
v 0.185467 -0.020208 0.342425
v 0.194925 -0.007947 0.349604
v 0.190154 -0.007947 0.341704
v 0.173474 -0.021049 0.350804
v 0.180113 -0.020208 0.342425
v 0.171532 -0.011387 0.349410
v 0.174050 -0.007390 0.342594
v 0.183696 -0.015280 0.333693
v 0.185832 -0.009199 0.329037
v 0.185946 -0.007803 0.315500
v 0.182624 -0.015085 0.330783
v 0.180323 -0.010083 0.327872
v 0.180966 -0.010035 0.315500
v 0.163730 -0.204482 0.358435
v 0.163730 -0.191379 0.358623
v 0.150627 -0.204482 0.356484
v 0.150627 -0.191379 0.357756
v 0.163730 -0.178277 0.358623
v 0.163730 -0.165175 0.358623
v 0.150627 -0.178277 0.358262
v 0.150627 -0.165175 0.358565
v 0.139772 -0.204482 0.351489
v 0.132914 -0.205440 0.342504
v 0.136583 -0.191781 0.352365
v 0.131587 -0.196416 0.347404
v 0.129442 -0.201711 0.338670
v 0.129818 -0.187681 0.349350
v 0.127382 -0.191781 0.342504
v 0.131211 -0.210446 0.334046
v 0.128857 -0.205440 0.329248
v 0.127979 -0.204482 0.315500
v 0.123199 -0.191379 0.328602
v 0.122672 -0.191379 0.315500
v 0.137525 -0.178277 0.355541
v 0.137525 -0.165175 0.357197
v 0.127914 -0.178277 0.350718
v 0.121305 -0.178006 0.341813
v 0.123978 -0.164347 0.351580
v 0.119315 -0.168162 0.346253
v 0.119209 -0.181526 0.328602
v 0.118945 -0.182177 0.315500
v 0.163730 -0.152072 0.358623
v 0.163730 -0.138970 0.358623
v 0.150627 -0.152072 0.358623
v 0.150627 -0.138970 0.358623
v 0.163730 -0.125868 0.358623
v 0.163730 -0.112765 0.358623
v 0.150627 -0.125868 0.358623
v 0.150627 -0.112765 0.358623
v 0.137525 -0.152072 0.358032
v 0.137525 -0.138970 0.358450
v 0.124423 -0.152072 0.354444
v 0.124423 -0.138970 0.356582
v 0.137525 -0.125868 0.358623
v 0.137525 -0.112765 0.358623
v 0.124423 -0.125868 0.357803
v 0.124423 -0.112765 0.358292
v 0.117170 -0.173458 0.337519
v 0.117546 -0.159427 0.348707
v 0.115773 -0.164347 0.341813
v 0.116555 -0.174975 0.328602
v 0.116292 -0.175626 0.315500
v 0.112586 -0.165175 0.328602
v 0.112059 -0.165175 0.315500
v 0.116056 -0.152072 0.349851
v 0.111024 -0.152072 0.341704
v 0.113403 -0.138970 0.351572
v 0.106512 -0.140091 0.342595
v 0.103128 -0.136470 0.338821
v 0.106911 -0.151093 0.329555
v 0.107087 -0.152900 0.315500
v 0.104897 -0.145205 0.334557
v 0.104545 -0.146073 0.325822
v 0.104434 -0.146349 0.315500
v 0.102455 -0.140091 0.329555
v 0.101445 -0.138970 0.315500
v 0.110312 -0.126431 0.352443
v 0.105273 -0.131174 0.347556
v 0.111320 -0.112765 0.355673
v 0.103504 -0.122439 0.349418
v 0.100980 -0.126431 0.342595
v 0.101545 -0.112765 0.350820
v 0.094903 -0.112657 0.341905
v 0.096665 -0.125868 0.328602
v 0.096138 -0.125868 0.315500
v 0.092839 -0.116421 0.328602
v 0.092576 -0.117072 0.315500
v 0.090855 -0.108218 0.337670
v 0.090186 -0.109870 0.328602
v 0.089922 -0.110520 0.315500
v 0.163730 -0.099663 0.358623
v 0.163730 -0.086561 0.358623
v 0.150627 -0.099663 0.358623
v 0.150627 -0.086561 0.358623
v 0.163730 -0.073458 0.358623
v 0.163730 -0.060356 0.358459
v 0.150627 -0.073458 0.358623
v 0.150627 -0.060356 0.358623
v 0.137525 -0.099663 0.358623
v 0.137525 -0.086561 0.358623
v 0.124423 -0.099663 0.358580
v 0.124423 -0.086561 0.358623
v 0.137525 -0.073458 0.358623
v 0.137525 -0.060356 0.358623
v 0.124423 -0.073458 0.358623
v 0.124423 -0.060356 0.358623
v 0.163730 -0.047254 0.358052
v 0.163730 -0.034151 0.357261
v 0.150627 -0.047254 0.358623
v 0.150627 -0.034151 0.358577
v 0.163730 -0.021049 0.355653
v 0.164737 -0.007390 0.352438
v 0.169776 -0.002652 0.347554
v 0.150627 -0.021049 0.358288
v 0.150627 -0.007947 0.357802
v 0.137525 -0.047254 0.358623
v 0.137525 -0.034151 0.358623
v 0.124423 -0.047254 0.358623
v 0.124423 -0.034151 0.358623
v 0.137525 -0.021049 0.358623
v 0.137525 -0.007947 0.358623
v 0.124423 -0.021049 0.358623
v 0.124423 -0.007947 0.358623
v 0.111320 -0.099663 0.357279
v 0.111320 -0.086561 0.358063
v 0.097708 -0.098997 0.351724
v 0.093000 -0.102921 0.346405
v 0.098218 -0.086561 0.354639
v 0.111320 -0.073458 0.358465
v 0.111320 -0.060356 0.358623
v 0.098218 -0.073458 0.356664
v 0.098218 -0.060356 0.357833
v 0.091232 -0.094186 0.348859
v 0.089371 -0.098997 0.341905
v 0.089687 -0.086561 0.350016
v 0.084490 -0.086561 0.341704
v 0.086052 -0.099663 0.328602
v 0.085525 -0.099663 0.315500
v 0.080509 -0.085744 0.329861
v 0.080718 -0.087795 0.315500
v 0.078231 -0.080832 0.326334
v 0.078065 -0.081244 0.315500
v 0.087034 -0.073458 0.351638
v 0.080110 -0.074742 0.342686
v 0.084042 -0.061082 0.352508
v 0.078959 -0.065933 0.347708
v 0.076814 -0.071230 0.338973
v 0.077190 -0.057198 0.349486
v 0.074578 -0.061082 0.342686
v 0.078583 -0.079965 0.335069
v 0.076053 -0.074742 0.329861
v 0.074911 -0.073458 0.315500
v 0.070132 -0.060356 0.328602
v 0.069604 -0.060356 0.315500
v 0.111320 -0.047254 0.358623
v 0.111320 -0.034151 0.358623
v 0.098218 -0.047254 0.358323
v 0.098218 -0.034151 0.358595
v 0.111320 -0.021049 0.358623
v 0.111320 -0.007947 0.358623
v 0.098218 -0.021049 0.358623
v 0.098218 -0.007947 0.358623
v 0.085116 -0.047254 0.355805
v 0.085116 -0.034151 0.357360
v 0.075176 -0.047254 0.350922
v 0.068501 -0.047308 0.341996
v 0.071437 -0.033648 0.351844
v 0.066686 -0.037680 0.346557
v 0.066470 -0.051316 0.328602
v 0.066207 -0.051966 0.315500
v 0.085116 -0.021049 0.358093
v 0.085116 -0.007947 0.358480
v 0.072013 -0.021049 0.354805
v 0.072013 -0.007947 0.356745
v -0.129544 -0.265319 0.349582
v -0.127173 -0.267748 0.341705
v -0.137624 -0.266257 0.350475
v -0.137624 -0.272054 0.341705
v -0.125303 -0.269484 0.328602
v -0.125039 -0.269728 0.315500
v -0.137624 -0.275525 0.328602
v -0.137624 -0.276014 0.315500
v -0.116914 -0.252974 0.338013
v -0.117303 -0.238901 0.349049
v -0.115250 -0.243476 0.342110
v -0.116122 -0.254946 0.328602
v -0.115858 -0.255603 0.315500
v -0.111642 -0.243789 0.328602
v -0.111116 -0.243789 0.315500
v -0.104672 -0.224624 0.336069
v -0.103259 -0.217584 0.338915
v -0.115654 -0.230686 0.350260
v -0.109190 -0.229670 0.340944
v -0.113024 -0.217584 0.351769
v -0.106473 -0.217584 0.345466
v -0.104311 -0.225525 0.328602
v -0.104047 -0.226180 0.315500
v -0.101123 -0.217584 0.328602
v -0.100597 -0.217584 0.315500
v -0.106941 -0.232076 0.328602
v -0.106677 -0.232732 0.315500
v -0.127465 -0.256891 0.351061
v -0.120743 -0.257161 0.342110
v -0.123863 -0.243476 0.351958
v -0.119056 -0.247636 0.346748
v -0.137624 -0.256891 0.354742
v -0.137624 -0.243789 0.357337
v -0.118751 -0.261498 0.328602
v -0.118488 -0.262154 0.315500
v -0.124522 -0.230686 0.354948
v -0.124522 -0.217584 0.356826
v -0.137624 -0.230686 0.358127
v -0.137624 -0.217584 0.358497
v 0.064541 -0.042976 0.337822
v 0.064917 -0.028945 0.348972
v 0.062969 -0.033648 0.341996
v 0.063817 -0.044764 0.328602
v 0.063553 -0.045415 0.315500
v 0.059518 -0.034151 0.328602
v 0.058991 -0.034151 0.315500
v 0.063318 -0.021049 0.350151
v 0.056892 -0.019874 0.340649
v 0.060665 -0.007947 0.351704
v 0.054114 -0.007947 0.345002
v 0.052268 -0.014723 0.335578
v 0.050896 -0.007947 0.338451
v 0.054612 -0.022038 0.328602
v 0.054349 -0.022689 0.315500
v 0.051959 -0.015487 0.328602
v 0.051695 -0.016138 0.315500
v 0.048905 -0.007947 0.328602
v 0.048377 -0.007947 0.315500
v -0.038206 -0.056672 0.338144
v -0.037367 -0.058761 0.328602
v -0.037104 -0.059417 0.315500
v -0.025964 -0.028323 0.336508
v -0.038595 -0.042601 0.349107
v -0.036466 -0.047082 0.342189
v -0.036899 -0.034151 0.350348
v -0.030407 -0.033275 0.341207
v -0.025556 -0.029339 0.328602
v -0.025293 -0.029995 0.315500
v -0.032747 -0.047254 0.328602
v -0.032221 -0.047254 0.315500
v -0.028186 -0.035891 0.328602
v -0.027923 -0.036546 0.315500
v -0.024504 -0.021049 0.339342
v -0.024600 -0.005517 0.349660
v -0.021758 -0.009109 0.342932
v -0.034269 -0.021049 0.351825
v -0.027718 -0.021049 0.345893
v -0.031555 -0.009109 0.352678
v -0.026353 -0.014251 0.348118
v -0.022228 -0.021049 0.328602
v -0.021702 -0.021049 0.315500
v -0.016969 -0.007947 0.328602
v -0.016443 -0.007947 0.315500
v -0.090677 -0.187540 0.338057
v -0.089870 -0.189552 0.328602
v -0.089607 -0.190207 0.315500
v -0.078436 -0.159191 0.336215
v -0.091067 -0.173468 0.349068
v -0.088988 -0.178012 0.342136
v -0.089402 -0.165175 0.350289
v -0.082929 -0.164205 0.341031
v -0.078059 -0.160130 0.328602
v -0.077796 -0.160785 0.315500
v -0.085344 -0.178277 0.328602
v -0.084818 -0.178277 0.315500
v -0.080689 -0.166681 0.328602
v -0.080426 -0.167336 0.315500
v -0.064441 -0.122106 0.338101
v -0.064831 -0.108034 0.349088
v -0.062727 -0.112547 0.342163
v -0.063618 -0.124157 0.328602
v -0.063355 -0.124812 0.315500
v -0.059046 -0.112765 0.328602
v -0.058520 -0.112765 0.315500
v -0.077007 -0.152072 0.339057
v -0.077072 -0.136383 0.349621
v -0.074280 -0.140038 0.342880
v -0.086773 -0.152072 0.351788
v -0.080221 -0.152072 0.345608
v -0.084002 -0.140038 0.352641
v -0.078825 -0.145118 0.348031
v -0.074825 -0.152072 0.328602
v -0.074298 -0.152072 0.315500
v -0.069565 -0.138970 0.328602
v -0.069039 -0.138970 0.315500
v -0.074961 -0.125868 0.351119
v -0.068221 -0.126231 0.342163
v -0.071416 -0.112547 0.352011
v -0.066584 -0.116769 0.346836
v -0.085215 -0.125868 0.356061
v -0.085215 -0.112765 0.357510
v -0.066248 -0.130708 0.328602
v -0.065985 -0.131363 0.315500
v -0.103308 -0.201817 0.349602
v -0.100541 -0.205503 0.342854
v -0.101213 -0.191379 0.351090
v -0.094482 -0.191696 0.342136
v -0.110225 -0.205503 0.352623
v -0.105062 -0.210552 0.347988
v -0.111420 -0.191379 0.356025
v -0.095863 -0.204482 0.328602
v -0.095337 -0.204482 0.315500
v -0.092500 -0.196103 0.328602
v -0.092237 -0.196759 0.315500
v -0.097639 -0.178012 0.351984
v -0.092820 -0.182202 0.346792
v -0.098317 -0.165175 0.354986
v -0.111420 -0.178277 0.357488
v -0.111420 -0.165175 0.358136
v -0.124522 -0.204482 0.357888
v -0.124522 -0.191379 0.358374
v -0.137624 -0.204482 0.358623
v -0.137624 -0.191379 0.358623
v -0.124522 -0.178277 0.358620
v -0.124522 -0.165175 0.358623
v -0.137624 -0.178277 0.358623
v -0.137624 -0.165175 0.358623
v -0.098317 -0.152072 0.356849
v -0.098317 -0.138970 0.357897
v -0.111420 -0.152072 0.358501
v -0.111420 -0.138970 0.358623
v -0.098317 -0.125868 0.358381
v -0.098317 -0.112765 0.358623
v -0.111420 -0.125868 0.358623
v -0.111420 -0.112765 0.358623
v -0.124522 -0.152072 0.358623
v -0.124522 -0.138970 0.358623
v -0.137624 -0.152072 0.358623
v -0.137624 -0.138970 0.358623
v -0.124522 -0.125868 0.358623
v -0.124522 -0.112765 0.358623
v -0.137624 -0.125868 0.358623
v -0.137624 -0.112765 0.358623
v -0.052200 -0.093757 0.336361
v -0.050756 -0.086561 0.339199
v -0.063151 -0.099663 0.350318
v -0.056668 -0.098740 0.341119
v -0.060521 -0.086561 0.351806
v -0.053970 -0.086561 0.345750
v -0.051808 -0.094735 0.328602
v -0.051545 -0.095390 0.315500
v -0.048526 -0.086561 0.328602
v -0.048000 -0.086561 0.315500
v -0.054437 -0.101286 0.328602
v -0.054174 -0.101941 0.315500
v -0.050836 -0.070950 0.349641
v -0.048019 -0.074574 0.342906
v -0.048710 -0.060356 0.351148
v -0.041959 -0.060766 0.342189
v -0.057778 -0.074574 0.352660
v -0.052589 -0.079685 0.348075
v -0.059010 -0.060356 0.356095
v -0.043267 -0.073458 0.328602
v -0.042741 -0.073458 0.315500
v -0.039997 -0.065313 0.328602
v -0.039734 -0.065968 0.315500
v -0.072113 -0.099663 0.355024
v -0.072113 -0.086561 0.356872
v -0.085215 -0.099663 0.358144
v -0.085215 -0.086561 0.358505
v -0.072113 -0.073458 0.357906
v -0.072113 -0.060356 0.358386
v -0.085215 -0.073458 0.358623
v -0.085215 -0.060356 0.358623
v -0.045192 -0.047082 0.352038
v -0.040348 -0.051336 0.346879
v -0.045908 -0.034151 0.355061
v -0.059010 -0.047254 0.357529
v -0.059010 -0.034151 0.358153
v -0.045908 -0.021049 0.356895
v -0.045908 -0.007947 0.357914
v -0.059010 -0.021049 0.358510
v -0.059010 -0.007947 0.358623
v -0.072113 -0.047254 0.358623
v -0.072113 -0.034151 0.358623
v -0.085215 -0.047254 0.358623
v -0.085215 -0.034151 0.358623
v -0.072113 -0.021049 0.358623
v -0.072113 -0.007947 0.358623
v -0.085215 -0.021049 0.358623
v -0.085215 -0.007947 0.358623
v -0.098317 -0.099663 0.358623
v -0.098317 -0.086561 0.358623
v -0.111420 -0.099663 0.358623
v -0.111420 -0.086561 0.358623
v -0.098317 -0.073458 0.358623
v -0.098317 -0.060356 0.358623
v -0.111420 -0.073458 0.358623
v -0.111420 -0.060356 0.358623
v -0.124522 -0.099663 0.358623
v -0.124522 -0.086561 0.358623
v -0.137624 -0.099663 0.358623
v -0.137624 -0.086561 0.358623
v -0.124522 -0.073458 0.358623
v -0.124522 -0.060356 0.358623
v -0.137624 -0.073458 0.358520
v -0.137624 -0.060356 0.358173
v -0.098317 -0.047254 0.358623
v -0.098317 -0.034151 0.358623
v -0.111420 -0.047254 0.358623
v -0.111420 -0.034151 0.358623
v -0.098317 -0.021049 0.358623
v -0.098317 -0.007947 0.358623
v -0.111420 -0.021049 0.358623
v -0.111420 -0.007947 0.358507
v -0.124522 -0.047254 0.358623
v -0.124522 -0.034151 0.358392
v -0.137624 -0.047254 0.357564
v -0.137624 -0.034151 0.356148
v -0.124522 -0.021049 0.357916
v -0.124522 -0.007947 0.356888
v -0.138877 -0.019880 0.352685
v -0.144080 -0.014733 0.348124
v -0.136157 -0.007947 0.351820
v -0.142709 -0.007947 0.345872
v -0.150727 -0.266257 0.350704
v -0.150727 -0.272054 0.341705
v -0.163829 -0.266257 0.350244
v -0.163829 -0.272054 0.341705
v -0.150727 -0.275525 0.328602
v -0.150727 -0.276014 0.315500
v -0.163829 -0.275525 0.328602
v -0.163829 -0.276014 0.315500
v -0.171413 -0.265319 0.349274
v -0.173536 -0.267748 0.341705
v -0.175407 -0.269484 0.328602
v -0.175670 -0.269728 0.315500
v -0.150727 -0.256891 0.355618
v -0.150727 -0.243789 0.358353
v -0.163829 -0.256891 0.354282
v -0.163829 -0.243789 0.357040
v -0.150727 -0.230686 0.358623
v -0.150727 -0.217584 0.358623
v -0.163829 -0.230686 0.357992
v -0.163829 -0.217584 0.358429
v -0.173248 -0.256891 0.350601
v -0.179820 -0.256425 0.341701
v -0.177296 -0.242749 0.351396
v -0.181906 -0.246424 0.346067
v -0.184049 -0.251747 0.337332
v -0.183664 -0.237689 0.348508
v -0.185326 -0.242749 0.341701
v -0.181958 -0.259655 0.328602
v -0.182221 -0.260309 0.315500
v -0.184595 -0.253104 0.328602
v -0.184859 -0.253758 0.315500
v -0.188346 -0.243789 0.328602
v -0.188872 -0.243789 0.315500
v -0.176931 -0.230686 0.354184
v -0.176931 -0.217584 0.356434
v -0.185074 -0.230686 0.349631
v -0.189880 -0.230686 0.341705
v -0.187712 -0.217584 0.351444
v -0.194557 -0.218470 0.342458
v -0.194174 -0.229476 0.329117
v -0.194047 -0.230935 0.315500
v -0.196301 -0.223429 0.333827
v -0.198059 -0.214694 0.338592
v -0.196652 -0.224301 0.325092
v -0.196685 -0.224384 0.315500
v -0.198604 -0.218470 0.329117
v -0.199423 -0.217584 0.315500
v -0.150727 -0.204482 0.358623
v -0.150727 -0.191379 0.358623
v -0.163829 -0.204482 0.358623
v -0.163829 -0.191379 0.358623
v -0.150727 -0.178277 0.358623
v -0.150727 -0.165175 0.358623
v -0.163829 -0.178277 0.358623
v -0.163829 -0.165175 0.358623
v -0.176931 -0.204482 0.357723
v -0.176931 -0.191379 0.358244
v -0.190943 -0.204795 0.352315
v -0.195916 -0.209372 0.347327
v -0.190034 -0.191379 0.355458
v -0.176931 -0.178277 0.358555
v -0.176931 -0.165175 0.358623
v -0.190034 -0.178277 0.357142
v -0.190034 -0.165175 0.358008
v -0.150727 -0.152072 0.358623
v -0.150727 -0.138970 0.358623
v -0.163829 -0.152072 0.358623
v -0.163829 -0.138970 0.358623
v -0.150727 -0.125868 0.358623
v -0.150727 -0.112765 0.358623
v -0.163829 -0.125868 0.358623
v -0.163829 -0.112765 0.358623
v -0.176931 -0.152072 0.358623
v -0.176931 -0.138970 0.358623
v -0.190034 -0.152072 0.358437
v -0.190034 -0.138970 0.358623
v -0.176931 -0.125868 0.358623
v -0.176931 -0.112765 0.358623
v -0.190034 -0.125868 0.358623
v -0.190034 -0.112765 0.358623
v -0.197674 -0.200637 0.349310
v -0.200062 -0.204795 0.342458
v -0.199538 -0.191379 0.350654
v -0.206128 -0.190998 0.341749
v -0.210311 -0.186376 0.337411
v -0.204171 -0.204482 0.328602
v -0.204698 -0.204482 0.315500
v -0.208248 -0.194356 0.328602
v -0.208511 -0.195010 0.315500
v -0.210886 -0.187805 0.328602
v -0.211149 -0.188459 0.315500
v -0.203535 -0.177323 0.351471
v -0.208168 -0.181054 0.346146
v -0.203136 -0.165175 0.354285
v -0.209926 -0.172319 0.348587
v -0.211634 -0.177323 0.341749
v -0.211364 -0.165175 0.349717
v -0.216256 -0.165175 0.341705
v -0.214722 -0.178277 0.328602
v -0.215248 -0.178277 0.315500
v -0.220481 -0.164049 0.329276
v -0.220338 -0.165636 0.315500
v -0.222913 -0.158931 0.325358
v -0.222975 -0.159085 0.315500
v -0.203136 -0.152072 0.356495
v -0.203136 -0.138970 0.357757
v -0.214002 -0.152072 0.351497
v -0.220864 -0.153044 0.342505
v -0.217182 -0.139369 0.352364
v -0.222178 -0.144002 0.347406
v -0.222562 -0.158059 0.334093
v -0.203136 -0.125868 0.358260
v -0.203136 -0.112765 0.358563
v -0.216238 -0.125868 0.355527
v -0.216238 -0.112765 0.357184
v -0.224321 -0.149324 0.338671
v -0.223936 -0.135267 0.349345
v -0.226370 -0.139369 0.342505
v -0.224912 -0.153044 0.329276
v -0.225799 -0.152072 0.315500
v -0.230547 -0.138970 0.328602
v -0.231074 -0.138970 0.315500
v -0.225828 -0.125868 0.350707
v -0.232435 -0.125571 0.341796
v -0.229774 -0.111896 0.351546
v -0.234429 -0.115684 0.346225
v -0.236572 -0.121007 0.337490
v -0.236188 -0.106949 0.348666
v -0.237941 -0.111896 0.341796
v -0.234538 -0.129057 0.328602
v -0.234802 -0.129711 0.315500
v -0.237176 -0.122506 0.328602
v -0.237439 -0.123160 0.315500
v -0.241098 -0.112765 0.328602
v -0.241624 -0.112765 0.315500
v -0.150727 -0.099663 0.358623
v -0.150727 -0.086561 0.358609
v -0.163829 -0.099663 0.358623
v -0.163829 -0.086561 0.358609
v -0.150727 -0.073458 0.358252
v -0.150727 -0.060356 0.357425
v -0.163829 -0.073458 0.358355
v -0.163829 -0.060356 0.357875
v -0.176931 -0.099663 0.358623
v -0.176931 -0.086561 0.358623
v -0.190034 -0.099663 0.358623
v -0.190034 -0.086561 0.358623
v -0.176931 -0.073458 0.358623
v -0.176931 -0.060356 0.358623
v -0.190034 -0.073458 0.358623
v -0.190034 -0.060356 0.358623
v -0.150727 -0.047254 0.355880
v -0.150419 -0.032841 0.352207
v -0.163829 -0.047254 0.356811
v -0.163829 -0.034151 0.354943
v -0.150419 -0.024104 0.349581
v -0.150403 -0.018135 0.345270
v -0.149709 -0.008765 0.339379
v -0.163153 -0.021342 0.351974
v -0.158335 -0.017170 0.346784
v -0.166711 -0.007947 0.351103
v -0.159972 -0.007618 0.342132
v -0.151227 -0.006956 0.328602
v -0.151578 -0.006513 0.315500
v -0.157986 -0.003186 0.328602
v -0.157723 -0.002521 0.315500
v -0.176931 -0.047254 0.358495
v -0.176931 -0.034151 0.358128
v -0.190034 -0.047254 0.358623
v -0.190034 -0.034151 0.358623
v -0.176931 -0.021049 0.357489
v -0.176931 -0.007947 0.356044
v -0.190034 -0.021049 0.358622
v -0.190034 -0.007947 0.358380
v -0.203136 -0.099663 0.358623
v -0.203136 -0.086561 0.358623
v -0.216238 -0.099663 0.358024
v -0.216238 -0.086561 0.358445
v -0.203136 -0.073458 0.358623
v -0.203136 -0.060356 0.358623
v -0.216238 -0.073458 0.358623
v -0.216238 -0.060356 0.358623
v -0.229341 -0.099663 0.354387
v -0.229341 -0.086561 0.356553
v -0.237655 -0.099663 0.349803
v -0.242632 -0.099663 0.341705
v -0.240292 -0.086561 0.351547
v -0.247171 -0.087617 0.342553
v -0.246788 -0.098622 0.329436
v -0.246628 -0.100337 0.315500
v -0.248824 -0.092689 0.334359
v -0.229341 -0.073458 0.357788
v -0.229341 -0.060356 0.358275
v -0.243420 -0.073942 0.352410
v -0.248439 -0.078632 0.347486
v -0.242443 -0.060356 0.355596
v -0.203136 -0.047254 0.358623
v -0.203136 -0.034151 0.358623
v -0.216238 -0.047254 0.358623
v -0.216238 -0.034151 0.358623
v -0.203136 -0.021049 0.358623
v -0.203136 -0.007947 0.358623
v -0.216238 -0.021049 0.358623
v -0.216238 -0.007947 0.358623
v -0.229341 -0.047254 0.358571
v -0.229341 -0.034151 0.358623
v -0.242443 -0.047254 0.357226
v -0.242443 -0.034151 0.358040
v -0.229341 -0.021049 0.358623
v -0.229341 -0.007947 0.358623
v -0.242443 -0.021049 0.358453
v -0.242443 -0.007947 0.358623
v -0.250582 -0.083954 0.338751
v -0.249175 -0.093561 0.325625
v -0.249266 -0.093786 0.315500
v -0.251219 -0.087617 0.329436
v -0.252174 -0.086561 0.315500
v -0.250198 -0.069897 0.349380
v -0.252677 -0.073942 0.342553
v -0.252119 -0.060356 0.350760
v -0.258743 -0.060145 0.341844
v -0.262834 -0.055637 0.337570
v -0.256923 -0.073458 0.328602
v -0.257450 -0.073458 0.315500
v -0.260829 -0.063758 0.328602
v -0.261092 -0.064412 0.315500
v -0.263466 -0.057207 0.328602
v -0.263730 -0.057861 0.315500
v -0.256012 -0.046469 0.351621
v -0.260691 -0.050314 0.346305
v -0.255545 -0.034151 0.354489
v -0.262450 -0.041579 0.348746
v -0.264248 -0.046469 0.341844
v -0.263945 -0.034151 0.349889
v -0.269008 -0.034151 0.341705
v -0.267474 -0.047254 0.328602
v -0.268000 -0.047254 0.315500
v -0.273096 -0.033196 0.329596
v -0.272918 -0.035038 0.315500
v -0.255545 -0.021049 0.356595
v -0.255545 -0.007947 0.357804
v -0.266582 -0.021049 0.351582
v -0.273479 -0.022191 0.342600
v -0.269659 -0.008515 0.352444
v -0.274701 -0.013262 0.347565
v -0.275086 -0.027319 0.334626
v -0.275437 -0.028191 0.325891
v -0.275556 -0.028487 0.315500
v -0.276844 -0.018584 0.338830
v -0.276460 -0.004527 0.349416
v -0.278985 -0.008515 0.342600
v -0.277527 -0.022191 0.329596
v -0.278551 -0.021049 0.315500
v -0.283299 -0.007947 0.328602
v -0.283826 -0.007947 0.315500
v 0.275987 -0.108425 0.302397
v 0.275723 -0.107769 0.289295
v 0.275339 -0.106813 0.281624
v 0.279502 -0.099663 0.302397
v 0.278975 -0.099663 0.289295
v 0.284758 -0.086561 0.302397
v 0.284231 -0.086561 0.289295
v 0.276774 -0.099663 0.278784
v 0.279502 -0.087647 0.275007
v 0.276702 -0.084003 0.268270
v 0.290422 -0.072442 0.302397
v 0.290158 -0.071785 0.289295
v 0.295270 -0.060356 0.302397
v 0.294743 -0.060356 0.289295
v 0.287794 -0.078993 0.302397
v 0.287530 -0.078336 0.289295
v 0.289331 -0.069721 0.279784
v 0.291051 -0.060151 0.275727
v 0.288940 -0.055646 0.268805
v 0.285561 -0.073836 0.275727
v 0.278817 -0.073458 0.266769
v 0.287188 -0.064381 0.271050
v 0.282353 -0.060151 0.265880
v 0.302229 -0.043009 0.302397
v 0.301966 -0.042352 0.289295
v 0.305783 -0.034151 0.302397
v 0.305256 -0.034151 0.289295
v 0.301570 -0.041364 0.281505
v 0.303016 -0.034151 0.278669
v 0.316665 -0.007025 0.302397
v 0.316401 -0.006368 0.289295
v 0.311039 -0.021049 0.302397
v 0.310512 -0.021049 0.289295
v 0.314037 -0.013576 0.302397
v 0.313773 -0.012919 0.289295
v 0.315561 -0.004273 0.279749
v 0.305753 -0.022173 0.274986
v 0.302932 -0.018554 0.268254
v 0.311811 -0.008363 0.275706
v 0.305059 -0.007947 0.266746
v 0.299601 -0.049560 0.302397
v 0.299338 -0.048903 0.289295
v 0.297109 -0.046340 0.276760
v 0.290624 -0.047254 0.267572
v 0.299803 -0.034151 0.272118
v 0.293252 -0.034151 0.266088
v 0.281651 -0.047254 0.262866
v 0.281651 -0.034151 0.261022
v 0.301180 -0.027289 0.269815
v 0.295988 -0.022173 0.265236
v 0.294753 -0.007947 0.261800
v 0.281651 -0.021049 0.259993
v 0.281651 -0.007947 0.259514
v 0.223501 -0.239259 0.302397
v 0.223237 -0.238602 0.289295
v 0.222879 -0.237709 0.281861
v 0.226940 -0.230686 0.302397
v 0.226413 -0.230686 0.289295
v 0.232196 -0.217584 0.302397
v 0.231669 -0.217584 0.289295
v 0.224288 -0.230686 0.279016
v 0.227002 -0.218594 0.275050
v 0.224241 -0.214900 0.268301
v 0.211693 -0.268691 0.302397
v 0.211430 -0.268035 0.289295
v 0.203037 -0.274977 0.302397
v 0.203037 -0.274076 0.289295
v 0.210640 -0.266066 0.279890
v 0.203693 -0.268461 0.275791
v 0.199763 -0.265318 0.268010
v 0.189934 -0.276014 0.302397
v 0.189934 -0.275525 0.289295
v 0.176832 -0.276014 0.302397
v 0.176832 -0.275525 0.289295
v 0.189934 -0.272053 0.276193
v 0.189934 -0.266256 0.267194
v 0.176832 -0.272053 0.276193
v 0.176832 -0.266256 0.267194
v 0.216427 -0.256891 0.302397
v 0.215900 -0.256891 0.289295
v 0.220873 -0.245810 0.302397
v 0.220609 -0.245153 0.289295
v 0.212300 -0.256572 0.275791
v 0.210250 -0.251991 0.268852
v 0.218358 -0.242761 0.276973
v 0.211896 -0.243789 0.267643
v 0.208498 -0.260726 0.271155
v 0.203693 -0.256572 0.266412
v 0.203037 -0.243789 0.262958
v 0.221075 -0.230686 0.272465
v 0.214524 -0.230686 0.266134
v 0.222489 -0.223635 0.269920
v 0.217329 -0.218594 0.265281
v 0.203037 -0.230686 0.261079
v 0.203037 -0.217584 0.260014
v 0.189934 -0.256891 0.262517
v 0.189934 -0.243789 0.259910
v 0.176832 -0.256891 0.262465
v 0.176832 -0.243789 0.259803
v 0.189934 -0.230686 0.259405
v 0.189934 -0.217584 0.259277
v 0.176832 -0.230686 0.259351
v 0.176832 -0.217584 0.259277
v 0.163730 -0.276014 0.302397
v 0.163730 -0.275258 0.289295
v 0.154519 -0.269728 0.302397
v 0.154783 -0.269217 0.289295
v 0.162854 -0.268992 0.275485
v 0.166637 -0.265318 0.268010
v 0.155757 -0.266951 0.279381
v 0.149206 -0.256891 0.302397
v 0.149734 -0.256891 0.289295
v 0.145314 -0.247282 0.302397
v 0.145578 -0.246631 0.289295
v 0.157902 -0.261655 0.270646
v 0.162854 -0.257129 0.266229
v 0.163730 -0.243789 0.262491
v 0.153785 -0.257129 0.275485
v 0.156133 -0.252920 0.268616
v 0.147708 -0.243355 0.276176
v 0.154284 -0.243789 0.267282
v 0.163730 -0.230686 0.260784
v 0.163730 -0.217584 0.259898
v 0.145630 -0.233402 0.271797
v 0.150249 -0.229695 0.266463
v 0.150627 -0.217584 0.263651
v 0.142661 -0.240731 0.302397
v 0.142925 -0.240080 0.289295
v 0.143484 -0.238698 0.280532
v 0.138593 -0.230686 0.302397
v 0.139120 -0.230686 0.289295
v 0.133456 -0.218005 0.302397
v 0.133314 -0.216442 0.288650
v 0.130803 -0.211454 0.302397
v 0.130860 -0.211314 0.292588
v 0.142176 -0.229695 0.276176
v 0.143861 -0.224667 0.269343
v 0.137559 -0.217584 0.276193
v 0.142426 -0.217584 0.268212
v 0.249744 -0.173842 0.302397
v 0.249480 -0.173185 0.289295
v 0.253221 -0.165175 0.302397
v 0.252694 -0.165175 0.289295
v 0.249109 -0.172261 0.281743
v 0.250531 -0.165175 0.278900
v 0.237936 -0.203275 0.302397
v 0.237673 -0.202618 0.289295
v 0.242708 -0.191379 0.302397
v 0.242181 -0.191379 0.289295
v 0.235308 -0.209826 0.302397
v 0.235045 -0.209169 0.289295
v 0.236870 -0.200617 0.279855
v 0.238550 -0.191098 0.275770
v 0.236480 -0.186543 0.268836
v 0.233060 -0.204784 0.275770
v 0.226331 -0.204482 0.266816
v 0.234728 -0.195278 0.271120
v 0.229913 -0.191098 0.265923
v 0.247116 -0.180393 0.302397
v 0.246852 -0.179736 0.289295
v 0.244608 -0.177288 0.276902
v 0.238138 -0.178277 0.267619
v 0.247318 -0.165175 0.272349
v 0.240767 -0.165175 0.266118
v 0.229241 -0.178277 0.262928
v 0.229241 -0.165175 0.261060
v 0.264179 -0.137858 0.302397
v 0.263916 -0.137201 0.289295
v 0.258477 -0.152072 0.302397
v 0.257950 -0.152072 0.289295
v 0.261551 -0.144409 0.302397
v 0.261288 -0.143752 0.289295
v 0.263100 -0.135169 0.279820
v 0.253252 -0.153120 0.275029
v 0.250472 -0.149452 0.268285
v 0.259310 -0.139310 0.275749
v 0.252574 -0.138970 0.266793
v 0.268989 -0.125868 0.302397
v 0.268462 -0.125868 0.289295
v 0.273358 -0.114976 0.302397
v 0.273095 -0.114320 0.289295
v 0.264800 -0.125624 0.275748
v 0.262711 -0.121095 0.268821
v 0.270859 -0.111814 0.276831
v 0.264381 -0.112765 0.267596
v 0.260958 -0.129830 0.271085
v 0.256133 -0.125624 0.265902
v 0.255446 -0.112765 0.262897
v 0.248719 -0.158186 0.269885
v 0.243549 -0.153120 0.265266
v 0.242344 -0.138970 0.261855
v 0.229241 -0.152072 0.260007
v 0.229241 -0.138970 0.259521
v 0.242344 -0.125868 0.260401
v 0.242344 -0.112765 0.259761
v 0.229241 -0.125868 0.259278
v 0.229241 -0.112765 0.259277
v 0.216139 -0.204482 0.261886
v 0.216139 -0.191379 0.260419
v 0.203037 -0.204482 0.259528
v 0.203037 -0.191379 0.259282
v 0.216139 -0.178277 0.259768
v 0.216139 -0.165175 0.259401
v 0.203037 -0.178277 0.259277
v 0.203037 -0.165175 0.259277
v 0.189934 -0.204482 0.259277
v 0.189934 -0.191379 0.259277
v 0.176832 -0.204482 0.259277
v 0.176832 -0.191379 0.259277
v 0.189934 -0.178277 0.259277
v 0.189934 -0.165175 0.259277
v 0.176832 -0.178277 0.259277
v 0.176832 -0.165175 0.259277
v 0.216139 -0.152072 0.259277
v 0.216139 -0.138970 0.259277
v 0.203037 -0.152072 0.259277
v 0.203037 -0.138970 0.259277
v 0.216139 -0.125868 0.259277
v 0.216139 -0.112765 0.259277
v 0.203037 -0.125868 0.259277
v 0.203037 -0.112765 0.259277
v 0.189934 -0.152072 0.259277
v 0.189934 -0.138970 0.259277
v 0.176832 -0.152072 0.259277
v 0.176832 -0.138970 0.259277
v 0.189934 -0.125868 0.259277
v 0.189934 -0.112765 0.259277
v 0.176832 -0.125868 0.259277
v 0.176832 -0.112765 0.259277
v 0.273560 -0.099663 0.272233
v 0.267009 -0.099663 0.266103
v 0.274949 -0.092738 0.269850
v 0.269769 -0.087647 0.265251
v 0.255446 -0.099663 0.261041
v 0.255446 -0.086561 0.260000
v 0.268548 -0.073458 0.261827
v 0.268548 -0.060356 0.260384
v 0.255446 -0.073458 0.259517
v 0.255446 -0.060356 0.259277
v 0.242344 -0.099663 0.259398
v 0.242344 -0.086561 0.259277
v 0.229241 -0.099663 0.259277
v 0.229241 -0.086561 0.259277
v 0.242344 -0.073458 0.259277
v 0.242344 -0.060356 0.259277
v 0.229241 -0.073458 0.259277
v 0.229241 -0.060356 0.259277
v 0.268548 -0.047254 0.259754
v 0.268548 -0.034151 0.259394
v 0.255446 -0.047254 0.259277
v 0.255446 -0.034151 0.259277
v 0.268548 -0.021049 0.259277
v 0.268548 -0.007947 0.259277
v 0.255446 -0.021049 0.259277
v 0.255446 -0.007947 0.259277
v 0.242344 -0.047254 0.259277
v 0.242344 -0.034151 0.259277
v 0.229241 -0.047254 0.259277
v 0.229241 -0.034151 0.259277
v 0.242344 -0.021049 0.259277
v 0.242344 -0.007947 0.259277
v 0.229241 -0.021049 0.259277
v 0.229241 -0.007947 0.259277
v 0.216139 -0.099663 0.259277
v 0.216139 -0.086561 0.259277
v 0.203037 -0.099663 0.259277
v 0.203037 -0.086561 0.259277
v 0.216139 -0.073458 0.259277
v 0.216139 -0.060356 0.259277
v 0.203037 -0.073458 0.259277
v 0.203037 -0.060356 0.259353
v 0.189934 -0.099663 0.259277
v 0.189934 -0.086561 0.259474
v 0.176832 -0.099663 0.259277
v 0.176832 -0.086561 0.259474
v 0.189934 -0.073458 0.259913
v 0.189934 -0.060356 0.260803
v 0.176832 -0.073458 0.259913
v 0.176832 -0.060356 0.260891
v 0.216139 -0.047254 0.259277
v 0.216139 -0.034151 0.259277
v 0.203037 -0.047254 0.259670
v 0.203037 -0.034151 0.260200
v 0.216139 -0.021049 0.259474
v 0.216139 -0.007947 0.259913
v 0.203037 -0.021049 0.261497
v 0.203037 -0.007947 0.263748
v 0.189934 -0.047254 0.262505
v 0.184091 -0.029369 0.270625
v 0.189048 -0.033902 0.265620
v 0.176832 -0.047254 0.262684
v 0.182022 -0.029369 0.270625
v 0.177325 -0.033902 0.265935
v 0.183696 -0.015281 0.284205
v 0.185946 -0.007803 0.302397
v 0.185832 -0.009199 0.288861
v 0.182624 -0.015085 0.287115
v 0.180966 -0.010035 0.302397
v 0.180323 -0.010083 0.290025
v 0.185468 -0.020209 0.275473
v 0.192306 -0.021049 0.266482
v 0.190155 -0.007947 0.276193
v 0.194926 -0.007947 0.268295
v 0.180112 -0.020209 0.275473
v 0.173473 -0.021049 0.267095
v 0.174050 -0.007392 0.275304
v 0.171531 -0.011389 0.268488
v 0.163730 -0.204482 0.259466
v 0.163730 -0.191379 0.259277
v 0.150627 -0.204482 0.261416
v 0.150627 -0.191379 0.260145
v 0.163730 -0.178277 0.259277
v 0.163730 -0.165175 0.259277
v 0.150627 -0.178277 0.259638
v 0.150627 -0.165175 0.259335
v 0.131212 -0.210445 0.283853
v 0.127979 -0.204482 0.302397
v 0.128857 -0.205439 0.288650
v 0.122672 -0.191379 0.302397
v 0.123200 -0.191379 0.289295
v 0.132915 -0.205439 0.275394
v 0.139773 -0.204482 0.266410
v 0.131588 -0.196414 0.270494
v 0.136583 -0.191780 0.265534
v 0.129443 -0.201710 0.279229
v 0.127383 -0.191780 0.275394
v 0.129819 -0.187679 0.268548
v 0.118945 -0.182177 0.302397
v 0.119209 -0.181525 0.289295
v 0.137525 -0.178277 0.262359
v 0.137525 -0.165175 0.260703
v 0.121306 -0.178005 0.276084
v 0.127915 -0.178277 0.267180
v 0.119315 -0.168160 0.271645
v 0.123979 -0.164346 0.266320
v 0.163730 -0.152072 0.259277
v 0.163730 -0.138970 0.259277
v 0.150627 -0.152072 0.259277
v 0.150627 -0.138970 0.259277
v 0.163730 -0.125868 0.259277
v 0.163730 -0.112765 0.259277
v 0.150627 -0.125868 0.259277
v 0.150627 -0.112765 0.259277
v 0.137525 -0.152072 0.259868
v 0.137525 -0.138970 0.259450
v 0.124423 -0.152072 0.263456
v 0.124422 -0.138970 0.261318
v 0.137525 -0.125868 0.259277
v 0.137525 -0.112765 0.259277
v 0.124422 -0.125868 0.260098
v 0.124422 -0.112765 0.259608
v 0.116292 -0.175626 0.302397
v 0.116556 -0.174974 0.289295
v 0.112059 -0.165175 0.302397
v 0.112587 -0.165175 0.289295
v 0.117170 -0.173457 0.280380
v 0.115774 -0.164346 0.276084
v 0.117547 -0.159425 0.269191
v 0.107087 -0.152900 0.302397
v 0.106912 -0.151093 0.288344
v 0.104898 -0.145204 0.283343
v 0.104434 -0.146349 0.302397
v 0.104545 -0.146073 0.292077
v 0.101445 -0.138970 0.302397
v 0.102455 -0.140090 0.288344
v 0.111026 -0.152072 0.276193
v 0.116057 -0.152072 0.268048
v 0.106513 -0.140090 0.275303
v 0.113404 -0.138970 0.266327
v 0.103129 -0.136469 0.279077
v 0.096138 -0.125868 0.302397
v 0.096667 -0.125868 0.289295
v 0.092576 -0.117072 0.302397
v 0.092840 -0.116420 0.289295
v 0.105274 -0.131172 0.270342
v 0.110313 -0.126430 0.265455
v 0.111320 -0.112765 0.262227
v 0.100981 -0.126430 0.275303
v 0.103505 -0.122437 0.268481
v 0.094904 -0.112656 0.275993
v 0.101546 -0.112765 0.267078
v 0.089922 -0.110520 0.302397
v 0.090187 -0.109868 0.289295
v 0.090856 -0.108216 0.280228
v 0.163730 -0.099663 0.259277
v 0.163730 -0.086561 0.259277
v 0.150627 -0.099663 0.259277
v 0.150627 -0.086561 0.259277
v 0.163730 -0.073458 0.259277
v 0.163730 -0.060356 0.259441
v 0.150627 -0.073458 0.259277
v 0.150627 -0.060356 0.259277
v 0.137525 -0.099663 0.259277
v 0.137525 -0.086561 0.259277
v 0.124422 -0.099663 0.259320
v 0.124422 -0.086561 0.259277
v 0.137525 -0.073458 0.259277
v 0.137525 -0.060356 0.259277
v 0.124422 -0.073458 0.259277
v 0.124422 -0.060356 0.259277
v 0.163730 -0.047254 0.259849
v 0.163730 -0.034151 0.260640
v 0.150627 -0.047254 0.259277
v 0.150627 -0.034151 0.259323
v 0.163730 -0.021049 0.262248
v 0.169775 -0.002654 0.270344
v 0.164736 -0.007392 0.265461
v 0.150627 -0.021049 0.259612
v 0.150627 -0.007947 0.260098
v 0.137525 -0.047254 0.259277
v 0.137525 -0.034151 0.259277
v 0.124422 -0.047254 0.259277
v 0.124422 -0.034151 0.259277
v 0.137525 -0.021049 0.259277
v 0.137525 -0.007947 0.259277
v 0.124422 -0.021049 0.259277
v 0.124422 -0.007947 0.259277
v 0.111320 -0.099663 0.260622
v 0.111320 -0.086561 0.259838
v 0.093001 -0.102919 0.271493
v 0.097708 -0.098996 0.266176
v 0.098218 -0.086561 0.263261
v 0.111320 -0.073458 0.259435
v 0.111320 -0.060356 0.259277
v 0.098218 -0.073458 0.261237
v 0.098218 -0.060356 0.260067
v 0.085525 -0.099663 0.302397
v 0.086053 -0.099663 0.289295
v 0.080718 -0.087795 0.302397
v 0.080510 -0.085744 0.288038
v 0.078065 -0.081244 0.302397
v 0.078231 -0.080832 0.291567
v 0.089372 -0.098996 0.275993
v 0.091232 -0.094184 0.269039
v 0.084492 -0.086561 0.276193
v 0.089689 -0.086561 0.267883
v 0.078583 -0.079963 0.282832
v 0.074911 -0.073458 0.302397
v 0.076053 -0.074741 0.288038
v 0.069604 -0.060356 0.302397
v 0.070133 -0.060356 0.289295
v 0.080111 -0.074741 0.275212
v 0.087035 -0.073458 0.266261
v 0.078960 -0.065931 0.270190
v 0.084043 -0.061081 0.265391
v 0.076814 -0.071228 0.278925
v 0.074579 -0.061081 0.275212
v 0.077191 -0.057196 0.268413
v 0.111320 -0.047254 0.259277
v 0.111320 -0.034151 0.259277
v 0.098218 -0.047254 0.259578
v 0.098218 -0.034151 0.259305
v 0.111320 -0.021049 0.259277
v 0.111320 -0.007947 0.259277
v 0.098218 -0.021049 0.259277
v 0.098218 -0.007947 0.259277
v 0.066207 -0.051966 0.302397
v 0.066471 -0.051314 0.289295
v 0.085115 -0.047254 0.262095
v 0.085115 -0.034151 0.260541
v 0.068503 -0.047307 0.275902
v 0.075177 -0.047254 0.266977
v 0.066687 -0.037678 0.271341
v 0.071438 -0.033647 0.266055
v 0.085115 -0.021049 0.259807
v 0.085115 -0.007947 0.259420
v 0.072013 -0.021049 0.263095
v 0.072013 -0.007947 0.261155
v -0.125039 -0.269728 0.302398
v -0.125303 -0.269484 0.289295
v -0.137624 -0.276014 0.302398
v -0.137624 -0.275525 0.289295
v -0.127174 -0.267748 0.276193
v -0.129545 -0.265318 0.268316
v -0.137624 -0.272053 0.276193
v -0.137624 -0.266256 0.267424
v -0.115858 -0.255603 0.302398
v -0.116122 -0.254946 0.289295
v -0.111116 -0.243789 0.302398
v -0.111643 -0.243789 0.289295
v -0.116914 -0.252973 0.279885
v -0.115250 -0.243475 0.275788
v -0.117304 -0.238899 0.268850
v -0.104047 -0.226180 0.302398
v -0.104311 -0.225524 0.289295
v -0.100597 -0.217584 0.302398
v -0.101124 -0.217584 0.289295
v -0.106677 -0.232732 0.302398
v -0.106941 -0.232075 0.289295
v -0.104673 -0.224623 0.281830
v -0.103260 -0.217584 0.278985
v -0.109192 -0.229669 0.276955
v -0.115655 -0.230686 0.267639
v -0.106474 -0.217584 0.272434
v -0.113026 -0.217584 0.266130
v -0.118488 -0.262154 0.302398
v -0.118752 -0.261497 0.289295
v -0.120744 -0.257161 0.275788
v -0.127466 -0.256891 0.266838
v -0.119057 -0.247634 0.271150
v -0.123864 -0.243475 0.265942
v -0.137624 -0.256891 0.263158
v -0.137624 -0.243789 0.260563
v -0.124522 -0.230686 0.262952
v -0.124522 -0.217584 0.261075
v -0.137624 -0.230686 0.259774
v -0.137624 -0.217584 0.259404
v 0.063553 -0.045415 0.302397
v 0.063817 -0.044763 0.289295
v 0.058991 -0.034151 0.302397
v 0.059519 -0.034151 0.289295
v 0.064542 -0.042975 0.280076
v 0.062970 -0.033647 0.275902
v 0.064918 -0.028943 0.268926
v 0.054349 -0.022689 0.302397
v 0.054613 -0.022037 0.289295
v 0.051695 -0.016138 0.302397
v 0.051959 -0.015486 0.289295
v 0.048377 -0.007947 0.302397
v 0.048906 -0.007947 0.289295
v 0.056894 -0.019873 0.277249
v 0.063320 -0.021049 0.267747
v 0.054115 -0.007947 0.272897
v 0.060666 -0.007947 0.266195
v 0.052269 -0.014722 0.282321
v 0.050897 -0.007947 0.279449
v -0.037104 -0.059417 0.302397
v -0.037367 -0.058760 0.289295
v -0.038206 -0.056671 0.279755
v -0.025293 -0.029995 0.302397
v -0.025557 -0.029338 0.289295
v -0.032221 -0.047254 0.302397
v -0.032748 -0.047254 0.289295
v -0.027923 -0.036546 0.302397
v -0.028186 -0.035889 0.289295
v -0.025965 -0.028321 0.281392
v -0.036467 -0.047081 0.275709
v -0.038596 -0.042598 0.268791
v -0.030408 -0.033274 0.276692
v -0.036900 -0.034151 0.267551
v -0.021702 -0.021049 0.302397
v -0.022229 -0.021049 0.289295
v -0.016443 -0.007947 0.302397
v -0.016969 -0.007947 0.289295
v -0.024505 -0.021049 0.278558
v -0.021759 -0.009108 0.274966
v -0.024601 -0.005514 0.268238
v -0.027719 -0.021049 0.272007
v -0.034270 -0.021049 0.266074
v -0.026354 -0.014249 0.269780
v -0.031555 -0.009108 0.265221
v -0.089607 -0.190207 0.302398
v -0.089870 -0.189551 0.289295
v -0.090678 -0.187539 0.279841
v -0.077796 -0.160785 0.302398
v -0.078060 -0.160129 0.289295
v -0.084818 -0.178277 0.302398
v -0.085345 -0.178277 0.289295
v -0.080426 -0.167336 0.302398
v -0.080689 -0.166680 0.289295
v -0.078437 -0.159189 0.281684
v -0.088989 -0.178011 0.275761
v -0.091068 -0.173465 0.268830
v -0.082930 -0.164204 0.276867
v -0.089404 -0.165175 0.267609
v -0.063355 -0.124812 0.302398
v -0.063619 -0.124155 0.289295
v -0.058520 -0.112765 0.302398
v -0.059047 -0.112765 0.289295
v -0.064442 -0.122105 0.279798
v -0.062729 -0.112546 0.275735
v -0.064832 -0.108032 0.268811
v -0.074298 -0.152072 0.302398
v -0.074826 -0.152072 0.289295
v -0.069039 -0.138970 0.302398
v -0.069566 -0.138970 0.289295
v -0.077008 -0.152072 0.278843
v -0.074281 -0.140037 0.275018
v -0.077073 -0.136381 0.268277
v -0.080223 -0.152072 0.272292
v -0.086774 -0.152072 0.266111
v -0.078826 -0.145116 0.269867
v -0.084002 -0.140037 0.265258
v -0.065985 -0.131363 0.302398
v -0.066249 -0.130707 0.289295
v -0.068222 -0.126230 0.275735
v -0.074963 -0.125868 0.266780
v -0.066585 -0.116767 0.271063
v -0.071416 -0.112546 0.265888
v -0.085215 -0.125868 0.261839
v -0.085215 -0.112765 0.260391
v -0.095337 -0.204482 0.302398
v -0.095864 -0.204482 0.289295
v -0.092237 -0.196759 0.302398
v -0.092500 -0.196102 0.289295
v -0.100542 -0.205502 0.275044
v -0.103309 -0.201815 0.268296
v -0.094483 -0.191696 0.275761
v -0.101215 -0.191379 0.266809
v -0.105062 -0.210550 0.269911
v -0.110226 -0.205502 0.265277
v -0.111420 -0.191379 0.261876
v -0.092821 -0.182200 0.271106
v -0.097640 -0.178011 0.265915
v -0.098317 -0.165175 0.262915
v -0.111420 -0.178277 0.260413
v -0.111420 -0.165175 0.259765
v -0.124522 -0.204482 0.260012
v -0.124522 -0.191379 0.259526
v -0.137624 -0.204482 0.259277
v -0.137624 -0.191379 0.259277
v -0.124522 -0.178277 0.259280
v -0.124522 -0.165175 0.259277
v -0.137624 -0.178277 0.259277
v -0.137624 -0.165175 0.259277
v -0.098317 -0.152072 0.261051
v -0.098317 -0.138970 0.260003
v -0.111420 -0.152072 0.259400
v -0.111420 -0.138970 0.259277
v -0.098317 -0.125868 0.259519
v -0.098317 -0.112765 0.259277
v -0.111420 -0.125868 0.259277
v -0.111420 -0.112765 0.259277
v -0.124522 -0.152072 0.259277
v -0.124522 -0.138970 0.259277
v -0.137624 -0.152072 0.259277
v -0.137624 -0.138970 0.259277
v -0.124522 -0.125868 0.259277
v -0.124522 -0.112765 0.259277
v -0.137624 -0.125868 0.259277
v -0.137624 -0.112765 0.259277
v -0.051545 -0.095390 0.302398
v -0.051808 -0.094733 0.289295
v -0.048000 -0.086561 0.302398
v -0.048527 -0.086561 0.289295
v -0.054174 -0.101941 0.302398
v -0.054438 -0.101285 0.289295
v -0.052201 -0.093755 0.281538
v -0.050757 -0.086561 0.278701
v -0.056669 -0.098739 0.276779
v -0.063152 -0.099663 0.267580
v -0.053971 -0.086561 0.272149
v -0.060522 -0.086561 0.266092
v -0.042741 -0.073458 0.302398
v -0.043268 -0.073458 0.289295
v -0.039734 -0.065968 0.302397
v -0.039997 -0.065311 0.289295
v -0.048020 -0.074572 0.274992
v -0.050837 -0.070948 0.268257
v -0.041961 -0.060765 0.275709
v -0.048711 -0.060356 0.266750
v -0.052590 -0.079683 0.269824
v -0.057779 -0.074572 0.265239
v -0.059010 -0.060356 0.261806
v -0.072113 -0.099663 0.262877
v -0.072113 -0.086561 0.261028
v -0.085215 -0.099663 0.259756
v -0.085215 -0.086561 0.259395
v -0.072113 -0.073458 0.259995
v -0.072113 -0.060356 0.259515
v -0.085215 -0.073458 0.259277
v -0.085215 -0.060356 0.259277
v -0.040349 -0.051333 0.271019
v -0.045193 -0.047081 0.265861
v -0.045908 -0.034151 0.262839
v -0.059010 -0.047254 0.260372
v -0.059010 -0.034151 0.259747
v -0.045908 -0.021049 0.261005
v -0.045908 -0.007947 0.259986
v -0.059010 -0.021049 0.259391
v -0.059010 -0.007947 0.259277
v -0.072113 -0.047254 0.259277
v -0.072113 -0.034151 0.259277
v -0.085215 -0.047254 0.259277
v -0.085215 -0.034151 0.259277
v -0.072113 -0.021049 0.259277
v -0.072113 -0.007947 0.259277
v -0.085215 -0.021049 0.259277
v -0.085215 -0.007947 0.259277
v -0.098317 -0.099663 0.259277
v -0.098317 -0.086561 0.259277
v -0.111420 -0.099663 0.259277
v -0.111420 -0.086561 0.259277
v -0.098317 -0.073458 0.259277
v -0.098317 -0.060356 0.259277
v -0.111420 -0.073458 0.259277
v -0.111420 -0.060356 0.259277
v -0.124522 -0.099663 0.259277
v -0.124522 -0.086561 0.259277
v -0.137624 -0.099663 0.259277
v -0.137624 -0.086561 0.259277
v -0.124522 -0.073458 0.259277
v -0.124522 -0.060356 0.259277
v -0.137624 -0.073458 0.259380
v -0.137624 -0.060356 0.259727
v -0.098317 -0.047254 0.259277
v -0.098317 -0.034151 0.259277
v -0.111420 -0.047254 0.259277
v -0.111420 -0.034151 0.259277
v -0.098317 -0.021049 0.259277
v -0.098317 -0.007947 0.259277
v -0.111420 -0.021049 0.259277
v -0.111420 -0.007947 0.259393
v -0.124522 -0.047254 0.259277
v -0.124522 -0.034151 0.259509
v -0.137624 -0.047254 0.260337
v -0.137624 -0.034151 0.261753
v -0.124522 -0.021049 0.259985
v -0.124522 -0.007947 0.261012
v -0.144080 -0.014735 0.269775
v -0.138877 -0.019881 0.265214
v -0.142708 -0.007947 0.272027
v -0.136156 -0.007947 0.266079
v -0.150727 -0.276014 0.302398
v -0.150727 -0.275525 0.289295
v -0.163829 -0.276014 0.302398
v -0.163829 -0.275525 0.289295
v -0.150727 -0.272053 0.276193
v -0.150727 -0.266256 0.267195
v -0.163829 -0.272053 0.276193
v -0.163829 -0.266256 0.267655
v -0.175670 -0.269728 0.302398
v -0.175406 -0.269484 0.289295
v -0.173535 -0.267748 0.276193
v -0.171412 -0.265318 0.268624
v -0.150727 -0.256891 0.262282
v -0.150727 -0.243789 0.259547
v -0.163829 -0.256891 0.263619
v -0.163829 -0.243789 0.260860
v -0.150727 -0.230686 0.259277
v -0.150727 -0.217584 0.259277
v -0.163829 -0.230686 0.259909
v -0.163829 -0.217584 0.259471
v -0.182221 -0.260309 0.302398
v -0.181957 -0.259655 0.289295
v -0.184859 -0.253758 0.302398
v -0.184595 -0.253103 0.289295
v -0.188872 -0.243789 0.302398
v -0.188345 -0.243789 0.289295
v -0.179819 -0.256424 0.276197
v -0.173247 -0.256891 0.267298
v -0.181905 -0.246422 0.271832
v -0.177295 -0.242748 0.266504
v -0.184049 -0.251746 0.280567
v -0.185325 -0.242748 0.276197
v -0.183663 -0.237687 0.269390
v -0.194047 -0.230935 0.302398
v -0.194173 -0.229476 0.288781
v -0.196300 -0.223428 0.284071
v -0.176931 -0.230686 0.263717
v -0.176931 -0.217584 0.261466
v -0.189878 -0.230686 0.276193
v -0.185073 -0.230686 0.268268
v -0.194555 -0.218470 0.275441
v -0.187710 -0.217584 0.266455
v -0.196685 -0.224384 0.302398
v -0.196652 -0.224301 0.292806
v -0.199423 -0.217584 0.302398
v -0.198604 -0.218470 0.288781
v -0.198059 -0.214694 0.279306
v -0.150727 -0.204482 0.259277
v -0.150727 -0.191379 0.259277
v -0.163829 -0.204482 0.259277
v -0.163829 -0.191379 0.259277
v -0.150727 -0.178277 0.259277
v -0.150727 -0.165175 0.259277
v -0.163829 -0.178277 0.259277
v -0.163829 -0.165175 0.259277
v -0.176931 -0.204482 0.260178
v -0.176931 -0.191379 0.259657
v -0.195915 -0.209369 0.270571
v -0.190942 -0.204794 0.265585
v -0.190034 -0.191379 0.262442
v -0.176931 -0.178277 0.259346
v -0.176931 -0.165175 0.259277
v -0.190034 -0.178277 0.260759
v -0.190034 -0.165175 0.259892
v -0.150727 -0.152072 0.259277
v -0.150727 -0.138970 0.259277
v -0.163829 -0.152072 0.259277
v -0.163829 -0.138970 0.259277
v -0.150727 -0.125868 0.259277
v -0.150727 -0.112765 0.259277
v -0.163829 -0.125868 0.259277
v -0.163829 -0.112765 0.259277
v -0.176931 -0.152072 0.259277
v -0.176931 -0.138970 0.259277
v -0.190034 -0.152072 0.259463
v -0.190034 -0.138970 0.259277
v -0.176931 -0.125868 0.259277
v -0.176931 -0.112765 0.259277
v -0.190034 -0.125868 0.259277
v -0.190034 -0.112765 0.259277
v -0.204698 -0.204482 0.302398
v -0.204171 -0.204482 0.289295
v -0.208511 -0.195010 0.302398
v -0.208248 -0.194355 0.289295
v -0.211149 -0.188459 0.302398
v -0.210885 -0.187804 0.289295
v -0.200062 -0.204794 0.275441
v -0.197674 -0.200635 0.268589
v -0.206127 -0.190998 0.276149
v -0.199537 -0.191379 0.267245
v -0.210310 -0.186376 0.280487
v -0.215248 -0.178277 0.302398
v -0.214721 -0.178277 0.289295
v -0.220338 -0.165636 0.302398
v -0.220481 -0.164049 0.288622
v -0.208167 -0.181052 0.271752
v -0.203534 -0.177322 0.266429
v -0.203136 -0.165175 0.263615
v -0.211633 -0.177322 0.276149
v -0.209925 -0.172317 0.269311
v -0.216254 -0.165175 0.276193
v -0.211363 -0.165175 0.268182
v -0.222975 -0.159085 0.302398
v -0.222913 -0.158931 0.292540
v -0.222562 -0.158059 0.283805
v -0.203136 -0.152072 0.261405
v -0.203136 -0.138970 0.260143
v -0.220863 -0.153043 0.275393
v -0.214001 -0.152072 0.266401
v -0.222177 -0.144000 0.270492
v -0.217181 -0.139367 0.265536
v -0.203136 -0.125868 0.259641
v -0.203136 -0.112765 0.259338
v -0.216238 -0.125868 0.262373
v -0.216238 -0.112765 0.260717
v -0.225799 -0.152072 0.302398
v -0.224912 -0.153043 0.288622
v -0.231074 -0.138970 0.302398
v -0.230547 -0.138970 0.289295
v -0.224320 -0.149324 0.279227
v -0.226369 -0.139367 0.275393
v -0.223935 -0.135265 0.268553
v -0.234802 -0.129711 0.302398
v -0.234538 -0.129057 0.289295
v -0.237439 -0.123160 0.302398
v -0.237176 -0.122505 0.289295
v -0.241624 -0.112765 0.302398
v -0.241097 -0.112765 0.289295
v -0.232434 -0.125571 0.276101
v -0.225827 -0.125868 0.267192
v -0.234429 -0.115682 0.271673
v -0.229773 -0.111895 0.266353
v -0.236572 -0.121006 0.280408
v -0.237940 -0.111895 0.276101
v -0.236187 -0.106947 0.269232
v -0.150727 -0.099663 0.259277
v -0.150727 -0.086561 0.259292
v -0.163829 -0.099663 0.259277
v -0.163829 -0.086561 0.259292
v -0.150727 -0.073458 0.259649
v -0.150727 -0.060356 0.260476
v -0.163829 -0.073458 0.259546
v -0.163829 -0.060356 0.260026
v -0.176931 -0.099663 0.259277
v -0.176931 -0.086561 0.259277
v -0.190034 -0.099663 0.259277
v -0.190034 -0.086561 0.259277
v -0.176931 -0.073458 0.259277
v -0.176931 -0.060356 0.259277
v -0.190034 -0.073458 0.259277
v -0.190034 -0.060356 0.259277
v -0.150727 -0.047254 0.262020
v -0.150418 -0.032841 0.265693
v -0.163829 -0.047254 0.261089
v -0.163829 -0.034151 0.262958
v -0.151578 -0.006513 0.302398
v -0.151226 -0.006956 0.289295
v -0.157723 -0.002521 0.302398
v -0.157986 -0.003186 0.289295
v -0.150402 -0.018137 0.272628
v -0.150418 -0.024106 0.268317
v -0.149709 -0.008765 0.278520
v -0.158336 -0.017172 0.271115
v -0.163154 -0.021343 0.265926
v -0.159973 -0.007618 0.275766
v -0.166713 -0.007947 0.266796
v -0.176931 -0.047254 0.259405
v -0.176931 -0.034151 0.259773
v -0.190034 -0.047254 0.259277
v -0.190034 -0.034151 0.259277
v -0.176931 -0.021049 0.260412
v -0.176931 -0.007947 0.261856
v -0.190034 -0.021049 0.259279
v -0.190034 -0.007947 0.259520
v -0.203136 -0.099663 0.259277
v -0.203136 -0.086561 0.259277
v -0.216238 -0.099663 0.259877
v -0.216238 -0.086561 0.259455
v -0.203136 -0.073458 0.259277
v -0.203136 -0.060356 0.259277
v -0.216238 -0.073458 0.259277
v -0.216238 -0.060356 0.259277
v -0.246628 -0.100337 0.302398
v -0.246788 -0.098622 0.288462
v -0.248824 -0.092688 0.283539
v -0.229341 -0.099663 0.263513
v -0.229341 -0.086561 0.261347
v -0.242630 -0.099663 0.276193
v -0.237653 -0.099663 0.268096
v -0.247170 -0.087617 0.275345
v -0.240291 -0.086561 0.266352
v -0.229341 -0.073458 0.260112
v -0.229341 -0.060356 0.259625
v -0.248439 -0.078630 0.270413
v -0.243420 -0.073941 0.265490
v -0.242443 -0.060356 0.262304
v -0.203136 -0.047254 0.259277
v -0.203136 -0.034151 0.259277
v -0.216238 -0.047254 0.259277
v -0.216238 -0.034151 0.259277
v -0.203136 -0.021049 0.259277
v -0.203136 -0.007947 0.259277
v -0.216238 -0.021049 0.259277
v -0.216238 -0.007947 0.259277
v -0.229341 -0.047254 0.259329
v -0.229341 -0.034151 0.259277
v -0.242443 -0.047254 0.260674
v -0.242443 -0.034151 0.259861
v -0.229341 -0.021049 0.259277
v -0.229341 -0.007947 0.259277
v -0.242443 -0.021049 0.259447
v -0.242443 -0.007947 0.259277
v -0.249266 -0.093786 0.302398
v -0.249175 -0.093561 0.292274
v -0.252174 -0.086561 0.302398
v -0.251219 -0.087617 0.288462
v -0.250582 -0.083954 0.279148
v -0.257450 -0.073458 0.302398
v -0.256923 -0.073458 0.289295
v -0.261092 -0.064412 0.302398
v -0.260828 -0.063758 0.289295
v -0.263730 -0.057861 0.302398
v -0.263466 -0.057206 0.289295
v -0.252676 -0.073941 0.275345
v -0.250197 -0.069895 0.268518
v -0.258741 -0.060144 0.276054
v -0.252117 -0.060356 0.267139
v -0.262834 -0.055636 0.280329
v -0.268000 -0.047254 0.302398
v -0.267473 -0.047254 0.289295
v -0.272918 -0.035038 0.302398
v -0.273096 -0.033196 0.288302
v -0.260690 -0.050312 0.271594
v -0.256012 -0.046468 0.266278
v -0.255545 -0.034151 0.263411
v -0.264248 -0.046468 0.276054
v -0.262449 -0.041577 0.269153
v -0.269006 -0.034151 0.276193
v -0.263944 -0.034151 0.268010
v -0.275086 -0.027318 0.283273
v -0.255545 -0.021049 0.261305
v -0.255545 -0.007947 0.260096
v -0.273478 -0.022190 0.275298
v -0.266581 -0.021049 0.266317
v -0.274700 -0.013260 0.270334
v -0.269659 -0.008514 0.265456
v -0.275556 -0.028487 0.302398
v -0.275437 -0.028191 0.292008
v -0.278551 -0.021049 0.302398
v -0.277527 -0.022190 0.288302
v -0.283826 -0.007947 0.302398
v -0.283299 -0.007947 0.289295
v -0.276844 -0.018584 0.279069
v -0.278984 -0.008514 0.275298
v -0.276459 -0.004525 0.268482
v 0.380260 0.154980 0.336748
v 0.380695 0.153898 0.328602
v 0.380958 0.153241 0.315500
v 0.381745 0.162384 0.339575
v 0.381622 0.177790 0.349691
v 0.384505 0.174248 0.342975
v 0.384099 0.162384 0.328602
v 0.384626 0.162384 0.315500
v 0.389355 0.175486 0.328602
v 0.389882 0.175486 0.315500
v 0.394251 0.192072 0.338255
v 0.393861 0.206146 0.349156
v 0.396053 0.201744 0.342255
v 0.383788 0.188589 0.351223
v 0.390563 0.188058 0.342255
v 0.387233 0.201744 0.352106
v 0.392109 0.197412 0.346989
v 0.395130 0.189882 0.328602
v 0.395393 0.189225 0.315500
v 0.399868 0.201691 0.328602
v 0.400394 0.201691 0.315500
v 0.392502 0.183330 0.328602
v 0.392765 0.182674 0.315500
v 0.327800 0.024084 0.336511
v 0.328209 0.023064 0.328602
v 0.328472 0.022408 0.315500
v 0.329260 0.031361 0.339344
v 0.329162 0.046893 0.349660
v 0.332004 0.043300 0.342932
v 0.331537 0.031361 0.328602
v 0.332064 0.031361 0.315500
v 0.336793 0.044463 0.328602
v 0.337320 0.044463 0.315500
v 0.354030 0.089532 0.336630
v 0.355502 0.096872 0.339460
v 0.354452 0.088481 0.328602
v 0.354715 0.087825 0.315500
v 0.357818 0.096872 0.328602
v 0.358345 0.096872 0.315500
v 0.341791 0.061175 0.338184
v 0.341401 0.075249 0.349124
v 0.343552 0.070796 0.342213
v 0.331303 0.057565 0.351176
v 0.338062 0.057111 0.342213
v 0.334793 0.070796 0.352062
v 0.339649 0.066514 0.346919
v 0.342644 0.059048 0.328602
v 0.342908 0.058392 0.315500
v 0.347306 0.070668 0.328602
v 0.347832 0.070668 0.315500
v 0.340016 0.052497 0.328602
v 0.340280 0.051841 0.315500
v 0.343110 0.083770 0.350373
v 0.349610 0.084607 0.341280
v 0.345738 0.096872 0.351841
v 0.352289 0.096872 0.346011
v 0.334060 0.083770 0.355095
v 0.334060 0.096872 0.356915
v 0.351824 0.081930 0.328602
v 0.352087 0.081273 0.315500
v 0.315171 0.009801 0.349109
v 0.317302 0.005323 0.342192
v 0.316868 0.018258 0.350350
v 0.323360 0.019133 0.341209
v 0.308573 0.005323 0.352041
v 0.313419 0.001066 0.346884
v 0.307855 0.018258 0.355064
v 0.321025 0.005156 0.328602
v 0.321551 0.005156 0.315500
v 0.325581 0.016513 0.328602
v 0.325844 0.015857 0.315500
v 0.319496 0.031361 0.351826
v 0.326047 0.031361 0.345896
v 0.322209 0.043300 0.352678
v 0.327410 0.038158 0.348118
v 0.307855 0.031361 0.356897
v 0.307855 0.044463 0.357914
v 0.294753 0.005156 0.357531
v 0.294753 0.018258 0.358154
v 0.281651 0.005156 0.358623
v 0.281651 0.018258 0.358623
v 0.294753 0.031361 0.358510
v 0.294753 0.044463 0.358623
v 0.281651 0.031361 0.358623
v 0.281651 0.044463 0.358623
v 0.320958 0.057565 0.356127
v 0.320958 0.070668 0.357546
v 0.307855 0.057565 0.358390
v 0.307855 0.070668 0.358623
v 0.320958 0.083770 0.358161
v 0.320958 0.096872 0.358513
v 0.307855 0.083770 0.358623
v 0.307855 0.096872 0.358623
v 0.294753 0.057565 0.358623
v 0.294753 0.070668 0.358623
v 0.281651 0.057565 0.358623
v 0.281651 0.070668 0.358623
v 0.294753 0.083770 0.358623
v 0.294753 0.096872 0.358623
v 0.281651 0.083770 0.358623
v 0.281651 0.096872 0.358623
v 0.368021 0.126624 0.338219
v 0.355392 0.112341 0.349675
v 0.358254 0.108774 0.342953
v 0.357546 0.123077 0.351200
v 0.364312 0.122584 0.342234
v 0.368887 0.124465 0.328602
v 0.369150 0.123809 0.315500
v 0.363074 0.109975 0.328602
v 0.363601 0.109975 0.315500
v 0.366259 0.117914 0.328602
v 0.366522 0.117257 0.315500
v 0.367631 0.140698 0.349140
v 0.369803 0.136270 0.342234
v 0.369353 0.149282 0.350397
v 0.375861 0.150080 0.341351
v 0.361013 0.136270 0.352084
v 0.365879 0.131963 0.346954
v 0.360265 0.149282 0.355125
v 0.373587 0.136179 0.328602
v 0.374113 0.136179 0.315500
v 0.378066 0.147346 0.328602
v 0.378330 0.146690 0.315500
v 0.348429 0.108774 0.352693
v 0.353640 0.103606 0.348153
v 0.347162 0.123077 0.356154
v 0.334060 0.109975 0.357921
v 0.334060 0.123077 0.358393
v 0.347162 0.136179 0.357561
v 0.347162 0.149282 0.358168
v 0.334060 0.136179 0.358623
v 0.334060 0.149282 0.358623
v 0.371981 0.162384 0.351857
v 0.378532 0.162384 0.346126
v 0.374648 0.174248 0.352708
v 0.379870 0.169055 0.348189
v 0.360265 0.162384 0.356934
v 0.360265 0.175486 0.357928
v 0.373367 0.188589 0.356181
v 0.373367 0.201691 0.357577
v 0.360265 0.188589 0.358397
v 0.360265 0.201691 0.358623
v 0.347162 0.162384 0.358517
v 0.347162 0.175486 0.358623
v 0.334060 0.162384 0.358623
v 0.334060 0.175486 0.358623
v 0.347162 0.188589 0.358623
v 0.347162 0.201691 0.358623
v 0.334060 0.188589 0.358623
v 0.334060 0.201691 0.358623
v 0.320958 0.109975 0.358623
v 0.320958 0.123077 0.358623
v 0.307855 0.109975 0.358623
v 0.307855 0.123077 0.358623
v 0.320958 0.136179 0.358623
v 0.320958 0.149282 0.358623
v 0.307855 0.136179 0.358623
v 0.307855 0.149282 0.358623
v 0.294753 0.109975 0.358623
v 0.294753 0.123077 0.358623
v 0.281651 0.109975 0.358623
v 0.281651 0.123077 0.358623
v 0.294753 0.136179 0.358623
v 0.294753 0.149282 0.358623
v 0.281651 0.136179 0.358547
v 0.281651 0.149282 0.358230
v 0.320958 0.162384 0.358623
v 0.320958 0.175486 0.358623
v 0.307855 0.162384 0.358623
v 0.307855 0.175486 0.358623
v 0.320958 0.188589 0.358623
v 0.320958 0.201691 0.358623
v 0.307855 0.188589 0.358623
v 0.307855 0.201691 0.358547
v 0.294753 0.162384 0.358623
v 0.294753 0.175486 0.358426
v 0.281651 0.162384 0.357700
v 0.281651 0.175486 0.356404
v 0.294753 0.188589 0.357988
v 0.294753 0.201691 0.357097
v 0.281651 0.188589 0.354152
v 0.281289 0.200631 0.351381
v 0.276680 0.204291 0.346060
v 0.406490 0.220429 0.336867
v 0.407988 0.227896 0.339691
v 0.406937 0.219314 0.328602
v 0.407201 0.218658 0.315500
v 0.410380 0.227896 0.328602
v 0.410907 0.227896 0.315500
v 0.420481 0.257520 0.338290
v 0.407852 0.243238 0.349707
v 0.410755 0.239721 0.342996
v 0.410031 0.254100 0.349857
v 0.416813 0.253532 0.342276
v 0.421373 0.255298 0.328602
v 0.421636 0.254642 0.315500
v 0.415636 0.240998 0.328602
v 0.416163 0.240998 0.315500
v 0.418745 0.248747 0.328602
v 0.419008 0.248091 0.315500
v 0.395596 0.214793 0.350421
v 0.402111 0.215554 0.341422
v 0.398224 0.227896 0.351872
v 0.404775 0.227896 0.346242
v 0.386469 0.214793 0.355156
v 0.386469 0.227896 0.356953
v 0.404309 0.212763 0.328602
v 0.404573 0.212107 0.315500
v 0.400868 0.239721 0.352623
v 0.406100 0.234503 0.348224
v 0.399572 0.254100 0.352616
v 0.386469 0.240998 0.357464
v 0.386469 0.254100 0.353772
v 0.420481 0.263097 0.338290
v 0.409604 0.261109 0.348940
v 0.413453 0.263860 0.342276
v 0.421373 0.264564 0.328602
v 0.421636 0.264808 0.315500
v 0.412674 0.268476 0.328602
v 0.412674 0.268965 0.315500
v 0.399572 0.261337 0.349282
v 0.399572 0.265005 0.341704
v 0.386469 0.261337 0.349282
v 0.386469 0.265005 0.341704
v 0.399572 0.268476 0.328602
v 0.399572 0.268965 0.315500
v 0.386469 0.268476 0.328602
v 0.386469 0.268965 0.315500
v 0.373367 0.214793 0.358175
v 0.373367 0.227896 0.358520
v 0.360265 0.214793 0.358623
v 0.360265 0.227896 0.358623
v 0.373367 0.240998 0.357929
v 0.373367 0.254100 0.353772
v 0.360265 0.240998 0.357929
v 0.360265 0.254100 0.353772
v 0.347162 0.214793 0.358623
v 0.347162 0.227896 0.358623
v 0.334060 0.214793 0.358623
v 0.334060 0.227896 0.358623
v 0.347162 0.240998 0.357929
v 0.347162 0.254100 0.353772
v 0.334060 0.240998 0.357929
v 0.334060 0.254100 0.353772
v 0.373367 0.261337 0.349282
v 0.373367 0.265005 0.341704
v 0.360265 0.261337 0.349282
v 0.360265 0.265005 0.341704
v 0.373367 0.268476 0.328602
v 0.373367 0.268965 0.315500
v 0.360265 0.268476 0.328602
v 0.360265 0.268965 0.315500
v 0.347162 0.261337 0.349282
v 0.347162 0.265005 0.341704
v 0.334060 0.261337 0.349282
v 0.334060 0.265005 0.341704
v 0.347162 0.268476 0.328602
v 0.347162 0.268965 0.315500
v 0.334060 0.268476 0.328602
v 0.334060 0.268965 0.315500
v 0.320958 0.214793 0.358623
v 0.320958 0.227896 0.358623
v 0.307855 0.214793 0.358230
v 0.307855 0.227896 0.357700
v 0.320958 0.240998 0.357929
v 0.320958 0.254100 0.353772
v 0.307855 0.240998 0.356253
v 0.307855 0.254100 0.352362
v 0.294753 0.214793 0.355395
v 0.293867 0.228146 0.352279
v 0.288909 0.232679 0.347273
v 0.285332 0.214793 0.350604
v 0.278756 0.214324 0.341697
v 0.287162 0.223945 0.349279
v 0.284808 0.228146 0.342425
v 0.276615 0.217554 0.328602
v 0.276352 0.218213 0.315500
v 0.280752 0.227896 0.328602
v 0.280225 0.227896 0.315500
v 0.297124 0.240998 0.351417
v 0.290286 0.241839 0.342425
v 0.299744 0.254100 0.349603
v 0.294972 0.254100 0.341704
v 0.286767 0.238033 0.338538
v 0.288514 0.246768 0.333694
v 0.290650 0.252847 0.329037
v 0.290765 0.254244 0.315500
v 0.286247 0.241839 0.329037
v 0.285466 0.240998 0.315500
v 0.288163 0.247645 0.324959
v 0.288144 0.247693 0.315500
v 0.320958 0.261337 0.349282
v 0.320958 0.265005 0.341704
v 0.307855 0.261306 0.348942
v 0.307855 0.264974 0.341704
v 0.320958 0.268476 0.328602
v 0.320958 0.268965 0.315500
v 0.307855 0.268476 0.328602
v 0.307855 0.268965 0.315500
v 0.301138 0.261068 0.348487
v 0.299448 0.262797 0.341704
v 0.297579 0.264564 0.328602
v 0.297316 0.264808 0.315500
v 0.268548 0.005156 0.358623
v 0.268548 0.018258 0.358623
v 0.255446 0.005156 0.358623
v 0.255446 0.018258 0.358623
v 0.268548 0.031361 0.358623
v 0.268548 0.044463 0.358623
v 0.255446 0.031361 0.358623
v 0.255446 0.044463 0.358623
v 0.242344 0.005156 0.358623
v 0.242344 0.018258 0.358623
v 0.229241 0.005156 0.358547
v 0.229241 0.018258 0.358230
v 0.242344 0.031361 0.358623
v 0.242344 0.044463 0.358426
v 0.229241 0.031361 0.357700
v 0.229241 0.044463 0.356404
v 0.268548 0.057565 0.358623
v 0.268548 0.070668 0.358623
v 0.255446 0.057565 0.358623
v 0.255446 0.070668 0.358547
v 0.268548 0.083770 0.358623
v 0.268548 0.096872 0.358623
v 0.255446 0.083770 0.358230
v 0.255446 0.096872 0.357700
v 0.242344 0.057565 0.357988
v 0.242344 0.070668 0.357097
v 0.229241 0.057565 0.354152
v 0.228879 0.069607 0.351381
v 0.224270 0.073268 0.346059
v 0.242344 0.083770 0.355395
v 0.241457 0.097122 0.352279
v 0.236499 0.101657 0.347273
v 0.232922 0.083770 0.350604
v 0.226346 0.083300 0.341697
v 0.234752 0.092922 0.349280
v 0.232399 0.097122 0.342425
v 0.224206 0.086530 0.328602
v 0.223943 0.087189 0.315500
v 0.228343 0.096872 0.328602
v 0.227816 0.096872 0.315500
v 0.216139 0.005156 0.357097
v 0.216139 0.018258 0.355395
v 0.202674 0.004096 0.351382
v 0.198065 0.007757 0.346059
v 0.206717 0.018258 0.350604
v 0.200142 0.017788 0.341697
v 0.198002 0.021019 0.328602
v 0.197738 0.021677 0.315500
v 0.215253 0.031611 0.352279
v 0.210294 0.036145 0.347273
v 0.218509 0.044463 0.351417
v 0.211672 0.045304 0.342425
v 0.208547 0.027410 0.349280
v 0.206195 0.031611 0.342425
v 0.208154 0.041497 0.338538
v 0.209901 0.050232 0.333694
v 0.202139 0.031361 0.328602
v 0.201612 0.031361 0.315500
v 0.207633 0.045304 0.329037
v 0.206853 0.044463 0.315500
v 0.196319 -0.000978 0.348487
v 0.194665 0.004096 0.341697
v 0.195925 0.013108 0.337324
v 0.171918 0.002677 0.338819
v 0.191657 0.005156 0.328602
v 0.191130 0.005156 0.315500
v 0.195381 0.014467 0.328602
v 0.195118 0.015126 0.315500
v 0.172596 0.006289 0.329581
v 0.173613 0.005156 0.315500
v 0.170513 0.012285 0.325866
v 0.170630 0.012575 0.315500
v 0.221130 0.057565 0.349604
v 0.216358 0.057565 0.341704
v 0.222523 0.064534 0.348487
v 0.220869 0.069607 0.341697
v 0.212037 0.056312 0.329037
v 0.212151 0.057708 0.315500
v 0.217861 0.070668 0.328602
v 0.217334 0.070668 0.315500
v 0.209550 0.051110 0.324959
v 0.209530 0.051157 0.315500
v 0.222130 0.078620 0.337324
v 0.221586 0.079979 0.328602
v 0.221322 0.080638 0.315500
v 0.268548 0.109975 0.358426
v 0.268548 0.123077 0.357988
v 0.255446 0.109975 0.356404
v 0.255446 0.123077 0.354152
v 0.268548 0.136179 0.357097
v 0.268548 0.149282 0.355395
v 0.255084 0.135119 0.351381
v 0.250475 0.138780 0.346059
v 0.259127 0.149282 0.350604
v 0.252551 0.148812 0.341697
v 0.250411 0.152042 0.328602
v 0.250148 0.152701 0.315500
v 0.244714 0.109975 0.351416
v 0.237876 0.110815 0.342425
v 0.247334 0.123077 0.349603
v 0.242563 0.123077 0.341704
v 0.234358 0.107008 0.338539
v 0.236105 0.115743 0.333694
v 0.238241 0.121824 0.329037
v 0.238355 0.123220 0.315500
v 0.233838 0.110815 0.329037
v 0.233057 0.109975 0.315500
v 0.235754 0.116621 0.324959
v 0.235735 0.116669 0.315500
v 0.248728 0.130045 0.348487
v 0.247074 0.135119 0.341697
v 0.248334 0.144132 0.337324
v 0.244066 0.136179 0.328602
v 0.243539 0.136179 0.315500
v 0.247791 0.145491 0.328602
v 0.247527 0.146149 0.315500
v 0.267662 0.162634 0.352279
v 0.262704 0.167168 0.347273
v 0.270919 0.175486 0.351417
v 0.264081 0.176327 0.342425
v 0.260957 0.158433 0.349279
v 0.258604 0.162634 0.342425
v 0.260563 0.172521 0.338539
v 0.262310 0.181256 0.333694
v 0.254548 0.162384 0.328602
v 0.254021 0.162384 0.315500
v 0.260042 0.176327 0.329037
v 0.259262 0.175486 0.315500
v 0.273539 0.188589 0.349603
v 0.268768 0.188589 0.341704
v 0.274933 0.195556 0.348487
v 0.273278 0.200631 0.341697
v 0.264446 0.187336 0.329037
v 0.264560 0.188732 0.315500
v 0.270270 0.201691 0.328602
v 0.269744 0.201691 0.315500
v 0.261959 0.182133 0.324959
v 0.261940 0.182181 0.315500
v 0.161654 0.005156 0.351579
v 0.168549 0.006289 0.342594
v 0.159020 0.018258 0.349883
v 0.164076 0.018258 0.341704
v 0.150627 0.005156 0.356592
v 0.150627 0.018258 0.354483
v 0.170162 0.011412 0.334600
v 0.168171 0.017295 0.329581
v 0.167995 0.019126 0.315500
v 0.157528 0.025679 0.348741
v 0.159326 0.030572 0.341843
v 0.157915 0.039743 0.337568
v 0.151094 0.030572 0.351618
v 0.155772 0.034414 0.346303
v 0.147200 0.044463 0.350760
v 0.153825 0.044251 0.341843
v 0.162549 0.031361 0.328602
v 0.163075 0.031361 0.315500
v 0.158546 0.041313 0.328602
v 0.158810 0.041968 0.315500
v 0.155912 0.047865 0.328602
v 0.156175 0.048519 0.315500
v 0.137525 0.005156 0.358452
v 0.137525 0.018258 0.358039
v 0.124423 0.005156 0.358623
v 0.124423 0.018258 0.358623
v 0.137525 0.031361 0.357226
v 0.137525 0.044463 0.355597
v 0.124423 0.031361 0.358571
v 0.124423 0.044463 0.358276
v 0.145281 0.054010 0.349381
v 0.147762 0.058052 0.342555
v 0.145667 0.068073 0.338755
v 0.152011 0.057565 0.328602
v 0.152538 0.057565 0.315500
v 0.146308 0.071732 0.329451
v 0.147269 0.070668 0.315500
v 0.144262 0.077682 0.325649
v 0.144355 0.077913 0.315500
v 0.138504 0.058052 0.352411
v 0.143524 0.062745 0.347490
v 0.135380 0.070668 0.351551
v 0.142261 0.071732 0.342555
v 0.124423 0.057565 0.357789
v 0.124423 0.070668 0.356557
v 0.143911 0.076808 0.334384
v 0.132746 0.083770 0.349813
v 0.137733 0.083770 0.341704
v 0.131277 0.091075 0.348677
v 0.133037 0.096014 0.341804
v 0.124423 0.083770 0.354400
v 0.124861 0.096014 0.351557
v 0.129521 0.099810 0.346238
v 0.141882 0.082737 0.329451
v 0.141721 0.084464 0.315500
v 0.136205 0.096872 0.328602
v 0.136731 0.096872 0.315500
v 0.111320 0.005156 0.358623
v 0.111320 0.018258 0.358623
v 0.098218 0.005156 0.358623
v 0.098218 0.018258 0.358623
v 0.111320 0.031361 0.358623
v 0.111320 0.044463 0.358623
v 0.098218 0.031361 0.358623
v 0.098218 0.044463 0.358623
v 0.085116 0.005156 0.358623
v 0.085116 0.018258 0.358623
v 0.072013 0.005156 0.357863
v 0.072013 0.018258 0.358353
v 0.085116 0.031361 0.358623
v 0.085116 0.044463 0.358623
v 0.072013 0.031361 0.358610
v 0.072013 0.044463 0.358623
v 0.111320 0.057565 0.358623
v 0.111320 0.070668 0.358446
v 0.098218 0.057565 0.358623
v 0.098218 0.070668 0.358623
v 0.111320 0.083770 0.358026
v 0.111320 0.096872 0.357192
v 0.098218 0.083770 0.358623
v 0.098218 0.096872 0.358564
v 0.085116 0.057565 0.358623
v 0.085116 0.070668 0.358623
v 0.072013 0.057565 0.358623
v 0.072013 0.070668 0.358623
v 0.085116 0.083770 0.358623
v 0.085116 0.096872 0.358623
v 0.072013 0.083770 0.358623
v 0.072013 0.096872 0.358623
v 0.131664 0.105139 0.337503
v 0.120926 0.109975 0.350717
v 0.127537 0.109694 0.341804
v 0.119030 0.119406 0.349352
v 0.121474 0.123495 0.342517
v 0.132272 0.106652 0.328602
v 0.132535 0.107307 0.315500
v 0.129638 0.113203 0.328602
v 0.129901 0.113858 0.315500
v 0.125667 0.123077 0.328602
v 0.126194 0.123077 0.315500
v 0.119416 0.133470 0.338691
v 0.120020 0.137174 0.329321
v 0.120925 0.136179 0.315500
v 0.118011 0.143078 0.325432
v 0.118081 0.143252 0.315500
v 0.111320 0.109975 0.355541
v 0.112272 0.123495 0.352375
v 0.117273 0.128141 0.347426
v 0.098218 0.109975 0.358263
v 0.098218 0.123077 0.357766
v 0.109106 0.136179 0.351512
v 0.115973 0.137174 0.342517
v 0.106472 0.149282 0.349743
v 0.111389 0.149282 0.341704
v 0.098218 0.136179 0.356513
v 0.098218 0.149282 0.354317
v 0.117660 0.142205 0.334167
v 0.115594 0.148180 0.329321
v 0.115447 0.149803 0.315500
v 0.085116 0.109975 0.358623
v 0.085116 0.123077 0.358623
v 0.072013 0.109975 0.358623
v 0.072013 0.123077 0.358623
v 0.085116 0.136179 0.358440
v 0.085116 0.149282 0.358013
v 0.072013 0.136179 0.358623
v 0.072013 0.149282 0.358623
v 0.105026 0.156472 0.348613
v 0.106749 0.161457 0.341766
v 0.105413 0.170535 0.337439
v 0.098629 0.161457 0.351496
v 0.103270 0.165207 0.346174
v 0.094652 0.175486 0.350674
v 0.101249 0.175136 0.341766
v 0.109861 0.162384 0.328602
v 0.110387 0.162384 0.315500
v 0.105998 0.171991 0.328602
v 0.106261 0.172645 0.315500
v 0.103363 0.178542 0.328602
v 0.103627 0.179196 0.315500
v 0.092779 0.184803 0.349324
v 0.095186 0.188938 0.342478
v 0.093165 0.198866 0.338626
v 0.099323 0.188589 0.328602
v 0.099850 0.188589 0.315500
v 0.093732 0.202617 0.329191
v 0.094581 0.201691 0.315500
v 0.085116 0.162384 0.357157
v 0.085116 0.175486 0.355485
v 0.072013 0.162384 0.358558
v 0.072013 0.175486 0.358250
v 0.086039 0.188938 0.352335
v 0.091022 0.193538 0.347361
v 0.082832 0.201691 0.351469
v 0.089685 0.202617 0.342478
v 0.072013 0.188589 0.357738
v 0.072013 0.201691 0.356463
v 0.091409 0.207601 0.333951
v 0.274539 0.209644 0.337325
v 0.273995 0.211003 0.328602
v 0.273732 0.211661 0.315500
v 0.091760 0.208474 0.325216
v 0.091807 0.208590 0.315500
v 0.080198 0.214793 0.349674
v 0.085045 0.214793 0.341704
v 0.078775 0.221868 0.348548
v 0.080461 0.226900 0.341727
v 0.072013 0.214793 0.354235
v 0.072396 0.226900 0.351435
v 0.077019 0.230603 0.346110
v 0.089306 0.213622 0.329191
v 0.089172 0.215142 0.315500
v 0.083517 0.227896 0.328602
v 0.084044 0.227896 0.315500
v 0.079162 0.235932 0.337375
v 0.068378 0.240998 0.350631
v 0.074961 0.240579 0.341727
v 0.066528 0.250199 0.349295
v 0.068898 0.254380 0.342439
v 0.079723 0.237329 0.328602
v 0.079987 0.237984 0.315500
v 0.077089 0.243880 0.328602
v 0.077352 0.244535 0.315500
v 0.072979 0.254100 0.328602
v 0.073506 0.254100 0.315500
v 0.066914 0.263097 0.338562
v 0.067903 0.264564 0.328602
v 0.068167 0.264808 0.315500
v 0.057772 0.004268 0.352574
v 0.052645 -0.000691 0.347860
v 0.058911 0.018258 0.355937
v 0.050876 0.008043 0.349553
v 0.048176 0.004268 0.342777
v 0.048807 0.018258 0.351024
v 0.042099 0.018042 0.342087
v 0.043598 0.005156 0.328602
v 0.043071 0.005156 0.315500
v 0.040101 0.013790 0.328602
v 0.039837 0.013139 0.315500
v 0.058911 0.031361 0.357441
v 0.058911 0.044463 0.358123
v 0.045167 0.031702 0.351937
v 0.040372 0.027562 0.346709
v 0.045809 0.044463 0.354937
v 0.038227 0.022265 0.337974
v 0.037448 0.020341 0.328602
v 0.037184 0.019690 0.315500
v 0.038603 0.036297 0.349040
v 0.036567 0.031702 0.342087
v 0.036950 0.044463 0.350253
v 0.030490 0.045476 0.340955
v 0.025954 0.050518 0.336088
v 0.032985 0.031361 0.328602
v 0.032457 0.031361 0.315500
v 0.028243 0.043067 0.328602
v 0.027979 0.042416 0.315500
v 0.025590 0.049618 0.328602
v 0.025326 0.048967 0.315500
v 0.058911 0.057565 0.358496
v 0.058911 0.070668 0.358623
v 0.045809 0.057565 0.356826
v 0.045809 0.070668 0.357894
v 0.058911 0.083770 0.358623
v 0.058911 0.096872 0.358623
v 0.045809 0.083770 0.358381
v 0.045809 0.096872 0.358623
v 0.034296 0.057565 0.351770
v 0.027745 0.057565 0.345498
v 0.031501 0.069617 0.352638
v 0.026331 0.064550 0.348012
v 0.024527 0.057565 0.338947
v 0.024562 0.073285 0.349621
v 0.020006 0.069373 0.343122
v 0.022371 0.057565 0.328602
v 0.021843 0.057565 0.315500
v 0.016385 0.065478 0.328602
v 0.016121 0.064823 0.315500
v 0.032706 0.083770 0.356067
v 0.032706 0.096872 0.357520
v 0.019220 0.084926 0.350614
v 0.015752 0.082229 0.347288
v 0.018788 0.095562 0.353240
v -0.011970 0.008762 0.338188
v -0.012359 0.022833 0.349126
v -0.010205 0.018382 0.342215
v -0.011116 0.006634 0.328602
v -0.010853 0.005979 0.315500
v -0.006449 0.018258 0.328602
v -0.005923 0.018258 0.315500
v 0.000272 0.037111 0.336654
v 0.001747 0.044463 0.339484
v -0.010647 0.031361 0.350377
v -0.004146 0.032191 0.341294
v -0.008017 0.044463 0.351844
v -0.001466 0.044463 0.346035
v 0.000695 0.036056 0.328602
v 0.000958 0.035401 0.315500
v 0.004070 0.044463 0.328602
v 0.004596 0.044463 0.315500
v -0.001935 0.029505 0.328602
v -0.001672 0.028849 0.315500
v -0.022458 0.005156 0.351177
v -0.015698 0.004699 0.342215
v -0.018969 0.018382 0.352065
v -0.014112 0.014098 0.346923
v -0.032806 0.005156 0.356128
v -0.032806 0.018258 0.357548
v -0.013745 0.000083 0.328602
v -0.013482 -0.000572 0.315500
v -0.019703 0.031361 0.355099
v -0.019703 0.044463 0.356919
v -0.032806 0.031361 0.358162
v -0.032806 0.044463 0.358514
v 0.001636 0.059917 0.349679
v 0.004503 0.056356 0.342958
v 0.003794 0.070668 0.351207
v 0.010563 0.070164 0.342241
v -0.005331 0.056356 0.352697
v -0.000117 0.051182 0.348162
v -0.006601 0.070668 0.356162
v 0.009330 0.057565 0.328602
v 0.009856 0.057565 0.315500
v 0.012506 0.065478 0.328602
v 0.012769 0.064823 0.315500
v 0.007255 0.083847 0.352092
v 0.012124 0.079532 0.346966
v 0.006501 0.096872 0.355137
v -0.006601 0.083770 0.357566
v -0.006601 0.096872 0.358170
v -0.019703 0.057565 0.357923
v -0.019703 0.070668 0.358394
v -0.032806 0.057565 0.358623
v -0.032806 0.070668 0.358623
v -0.019703 0.083770 0.358623
v -0.019703 0.096872 0.358623
v -0.032806 0.083770 0.358623
v -0.032806 0.096872 0.358623
v 0.058911 0.109975 0.358623
v 0.058911 0.123077 0.358623
v 0.045809 0.109975 0.358623
v 0.045809 0.123077 0.358623
v 0.058911 0.136179 0.358623
v 0.058911 0.149282 0.358623
v 0.045809 0.136179 0.358623
v 0.045809 0.149282 0.358623
v 0.032706 0.109975 0.358154
v 0.032706 0.123077 0.358511
v 0.019604 0.109975 0.356578
v 0.019604 0.123077 0.357820
v 0.032706 0.136179 0.358623
v 0.032706 0.149282 0.358623
v 0.019604 0.136179 0.358399
v 0.019604 0.149282 0.358623
v 0.058911 0.162384 0.358623
v 0.058911 0.175486 0.358623
v 0.045809 0.162384 0.358623
v 0.045809 0.175486 0.358623
v 0.058911 0.188589 0.358623
v 0.058911 0.201691 0.358433
v 0.045809 0.188589 0.358623
v 0.045809 0.201691 0.358623
v 0.032706 0.162384 0.358623
v 0.032706 0.175486 0.358623
v 0.019604 0.162384 0.358623
v 0.019604 0.175486 0.358623
v 0.032706 0.188589 0.358623
v 0.032706 0.201691 0.358623
v 0.019604 0.188589 0.358623
v 0.019604 0.201691 0.358623
v 0.006501 0.109975 0.356942
v 0.006501 0.123077 0.357932
v -0.006601 0.109975 0.358518
v -0.006601 0.123077 0.358623
v 0.006501 0.136179 0.358399
v 0.006501 0.149282 0.358623
v -0.006601 0.136179 0.358623
v -0.006601 0.149282 0.358623
v -0.019703 0.109975 0.358623
v -0.019703 0.123077 0.358623
v -0.032806 0.109975 0.358623
v -0.032806 0.123077 0.358623
v -0.019703 0.136179 0.358623
v -0.019703 0.149282 0.358623
v -0.032806 0.136179 0.358623
v -0.032806 0.149282 0.358623
v 0.006501 0.162384 0.358623
v 0.006501 0.175486 0.358623
v -0.006601 0.162384 0.358623
v -0.006601 0.175486 0.358623
v 0.006501 0.188589 0.358623
v 0.006501 0.201691 0.358623
v -0.006601 0.188589 0.358623
v -0.006601 0.201691 0.358623
v -0.019703 0.162384 0.358623
v -0.019703 0.175486 0.358623
v -0.032806 0.162384 0.358623
v -0.032806 0.175486 0.358623
v -0.019703 0.188589 0.358623
v -0.019703 0.201691 0.358623
v -0.032806 0.188589 0.358469
v -0.032806 0.201691 0.358070
v -0.045908 0.005156 0.358390
v -0.045908 0.018258 0.358623
v -0.059010 0.005156 0.358623
v -0.059010 0.018258 0.358623
v -0.045908 0.031361 0.358623
v -0.045908 0.044463 0.358623
v -0.059010 0.031361 0.358623
v -0.059010 0.044463 0.358623
v -0.072113 0.005156 0.358623
v -0.072113 0.018258 0.358623
v -0.085215 0.005156 0.358623
v -0.085215 0.018258 0.358623
v -0.072113 0.031361 0.358623
v -0.072113 0.044463 0.358623
v -0.085215 0.031361 0.358623
v -0.085215 0.044463 0.358623
v -0.045908 0.057565 0.358623
v -0.045908 0.070668 0.358623
v -0.059010 0.057565 0.358623
v -0.059010 0.070668 0.358623
v -0.045908 0.083770 0.358623
v -0.045908 0.096872 0.358623
v -0.059010 0.083770 0.358623
v -0.059010 0.096872 0.358623
v -0.072113 0.057565 0.358623
v -0.072113 0.070668 0.358623
v -0.085215 0.057565 0.358494
v -0.085215 0.070668 0.358122
v -0.072113 0.083770 0.358610
v -0.072113 0.096872 0.358353
v -0.085215 0.083770 0.357439
v -0.085215 0.096872 0.355937
v -0.098317 0.005156 0.358623
v -0.098317 0.018258 0.358623
v -0.111420 0.005156 0.358147
v -0.111420 0.018258 0.357508
v -0.098317 0.031361 0.358379
v -0.098317 0.044463 0.357890
v -0.111420 0.031361 0.356049
v -0.112617 0.045494 0.352630
v -0.117783 0.050549 0.347995
v -0.124522 0.005156 0.355041
v -0.125218 0.018048 0.352013
v -0.130049 0.022275 0.346834
v -0.133509 0.005156 0.350333
v -0.139994 0.004266 0.341187
v -0.131814 0.013540 0.349094
v -0.133921 0.018048 0.342162
v -0.142216 0.006859 0.328602
v -0.142479 0.007511 0.315500
v -0.137608 0.018258 0.328602
v -0.138135 0.018258 0.315500
v -0.121661 0.031361 0.351109
v -0.128397 0.031712 0.342162
v -0.119548 0.041814 0.349611
v -0.122324 0.045494 0.342858
v -0.132193 0.027579 0.338099
v -0.130368 0.036167 0.328602
v -0.130631 0.036819 0.315500
v -0.127014 0.044463 0.328602
v -0.127541 0.044463 0.315500
v -0.133016 0.029616 0.328602
v -0.133280 0.030268 0.315500
v -0.098317 0.057565 0.356819
v -0.098317 0.070668 0.354929
v -0.109813 0.057565 0.351764
v -0.116365 0.057565 0.345450
v -0.107165 0.070668 0.350246
v -0.113622 0.069640 0.340927
v -0.115872 0.072026 0.328602
v -0.116135 0.072678 0.315500
v -0.098957 0.083422 0.351934
v -0.103751 0.087557 0.346705
v -0.095317 0.096872 0.351023
v -0.102025 0.097086 0.342085
v -0.105517 0.078822 0.349036
v -0.107549 0.083422 0.342085
v -0.105895 0.092861 0.337970
v -0.104024 0.101334 0.328602
v -0.104287 0.101986 0.315500
v -0.111124 0.083770 0.328602
v -0.111651 0.083770 0.315500
v -0.106672 0.094783 0.328602
v -0.106936 0.095435 0.315500
v -0.119581 0.057565 0.338899
v -0.118161 0.064587 0.336041
v -0.121718 0.057565 0.328602
v -0.122245 0.057565 0.315500
v -0.118520 0.065475 0.328602
v -0.118784 0.066127 0.315500
v -0.045908 0.109975 0.358623
v -0.045908 0.123077 0.358623
v -0.059010 0.109975 0.358623
v -0.059010 0.123077 0.358482
v -0.045908 0.136179 0.358623
v -0.045908 0.149282 0.358597
v -0.059010 0.136179 0.358096
v -0.059010 0.149282 0.357370
v -0.072113 0.109975 0.357864
v -0.072113 0.123077 0.356750
v -0.086357 0.110868 0.352575
v -0.091485 0.115831 0.347866
v -0.083469 0.123077 0.351708
v -0.090021 0.123077 0.345029
v -0.072113 0.136179 0.354817
v -0.072697 0.148796 0.351855
v -0.077454 0.152839 0.346576
v -0.080821 0.136179 0.350160
v -0.087250 0.135014 0.340667
v -0.079219 0.144104 0.348979
v -0.081177 0.148796 0.342007
v -0.089527 0.137193 0.328602
v -0.089791 0.137845 0.315500
v -0.084641 0.149282 0.328602
v -0.085168 0.149282 0.315500
v -0.045908 0.162384 0.358327
v -0.045908 0.175486 0.357839
v -0.059010 0.162384 0.355825
v -0.060096 0.176242 0.352519
v -0.065188 0.181113 0.347737
v -0.045908 0.188589 0.356681
v -0.045908 0.201691 0.354687
v -0.057125 0.188589 0.351652
v -0.063677 0.188589 0.344607
v -0.054477 0.201691 0.350056
v -0.060878 0.200388 0.340407
v -0.063183 0.202360 0.328602
v -0.063447 0.203012 0.315500
v -0.068973 0.162384 0.350937
v -0.075653 0.162460 0.342007
v -0.066953 0.172378 0.349496
v -0.069580 0.176242 0.342704
v -0.079598 0.158143 0.337841
v -0.077680 0.166501 0.328602
v -0.077943 0.167153 0.315500
v -0.074047 0.175486 0.328602
v -0.074574 0.175486 0.315500
v -0.080328 0.159950 0.328602
v -0.080592 0.160601 0.315500
v -0.066892 0.188589 0.338056
v -0.065566 0.195151 0.335175
v -0.068751 0.188589 0.328602
v -0.069278 0.188589 0.315500
v -0.065832 0.195809 0.328602
v -0.066095 0.196460 0.315500
v -0.093251 0.107096 0.349554
v -0.095952 0.110868 0.342781
v -0.093237 0.123077 0.338478
v -0.100531 0.109975 0.328602
v -0.101058 0.109975 0.315500
v -0.095234 0.123077 0.328602
v -0.095761 0.123077 0.315500
v -0.091864 0.129869 0.335608
v -0.092176 0.130642 0.328602
v -0.092439 0.131294 0.315500
v 0.058911 0.214793 0.358000
v 0.058911 0.227896 0.357123
v 0.045809 0.214793 0.358623
v 0.045809 0.227896 0.358552
v 0.058911 0.240998 0.355397
v 0.059807 0.254380 0.351086
v 0.064771 0.258934 0.347297
v 0.045809 0.240998 0.357858
v 0.045808 0.254100 0.353772
v 0.032706 0.214793 0.358623
v 0.032706 0.227896 0.358623
v 0.019604 0.214793 0.358623
v 0.019604 0.227896 0.358623
v 0.032706 0.240998 0.357929
v 0.032706 0.254100 0.353772
v 0.019604 0.240998 0.357929
v 0.019604 0.254100 0.353772
v 0.056037 0.261109 0.348940
v 0.059807 0.263860 0.342439
v 0.045808 0.261337 0.349282
v 0.045808 0.265005 0.341704
v 0.058911 0.268476 0.328602
v 0.058911 0.268965 0.315500
v 0.045808 0.268476 0.328602
v 0.045808 0.268965 0.315500
v 0.032706 0.261337 0.349282
v 0.032706 0.265005 0.341704
v 0.019604 0.261337 0.349282
v 0.019604 0.265005 0.341704
v 0.032706 0.268476 0.328602
v 0.032706 0.268965 0.315500
v 0.019604 0.268476 0.328602
v 0.019604 0.268965 0.315500
v 0.006501 0.214793 0.358623
v 0.006501 0.227896 0.358623
v -0.006601 0.214793 0.358623
v -0.006601 0.227896 0.358623
v 0.006501 0.240998 0.357929
v 0.006501 0.254100 0.353772
v -0.006601 0.240998 0.357929
v -0.006601 0.254100 0.353772
v -0.019703 0.214793 0.358584
v -0.019703 0.227896 0.358302
v -0.032806 0.214793 0.357301
v -0.032806 0.227896 0.355713
v -0.019703 0.240998 0.357466
v -0.019703 0.254100 0.353592
v -0.033836 0.241616 0.352464
v -0.038890 0.246395 0.347608
v -0.030781 0.254100 0.350834
v -0.037684 0.255279 0.342626
v -0.039268 0.260433 0.334742
v 0.006501 0.261337 0.349282
v 0.006501 0.265005 0.341704
v -0.006601 0.261337 0.349282
v -0.006601 0.265005 0.341704
v 0.006501 0.268476 0.328602
v 0.006501 0.268965 0.315500
v -0.006601 0.268476 0.328602
v -0.006601 0.268965 0.315500
v -0.019703 0.261337 0.349282
v -0.019703 0.265005 0.341704
v -0.028390 0.261109 0.348940
v -0.031065 0.262828 0.341705
v -0.019703 0.268476 0.328602
v -0.019703 0.268965 0.315500
v -0.034063 0.264172 0.329665
v -0.032806 0.265784 0.315500
v -0.046436 0.214170 0.351761
v -0.051156 0.218121 0.346447
v -0.042629 0.227896 0.350851
v -0.049281 0.227834 0.341930
v -0.052922 0.209386 0.348898
v -0.054805 0.214170 0.341930
v -0.053300 0.223425 0.337712
v -0.051336 0.231668 0.328602
v -0.051599 0.232320 0.315500
v -0.058157 0.214793 0.328602
v -0.058684 0.214793 0.315500
v -0.053984 0.225116 0.328602
v -0.054247 0.225768 0.315500
v -0.040656 0.237660 0.349439
v -0.043208 0.241616 0.342626
v -0.041034 0.251698 0.338873
v -0.047564 0.240998 0.328602
v -0.048091 0.240998 0.315500
v -0.041738 0.255279 0.329665
v -0.042794 0.254100 0.315500
v -0.039620 0.261302 0.326007
v -0.039751 0.261628 0.315500
v -0.144459 -0.000694 0.336474
v -0.168798 0.002601 0.349617
v -0.166004 0.006244 0.342892
v -0.168689 0.018258 0.339197
v -0.144864 0.000308 0.328602
v -0.145128 0.000960 0.315500
v -0.161287 0.005156 0.328602
v -0.160761 0.005156 0.315500
v -0.166473 0.018258 0.328602
v -0.165947 0.018258 0.315500
v -0.170117 0.025474 0.336382
v -0.169723 0.026471 0.328602
v -0.169460 0.027135 0.315500
v -0.175709 0.006244 0.352642
v -0.170527 0.011336 0.348051
v -0.178448 0.018258 0.351812
v -0.171896 0.018258 0.345748
v -0.190034 0.005156 0.357901
v -0.190034 0.018258 0.356880
v -0.181040 0.031361 0.350341
v -0.174546 0.030449 0.341131
v -0.182718 0.039842 0.349109
v -0.180579 0.044311 0.342209
v -0.190034 0.031361 0.355055
v -0.189302 0.044311 0.352053
v -0.184447 0.048577 0.346914
v -0.172315 0.033022 0.328602
v -0.172052 0.033686 0.315500
v -0.176843 0.044463 0.328602
v -0.176317 0.044463 0.315500
v -0.182309 0.053980 0.338179
v -0.192777 0.057565 0.351190
v -0.186010 0.058034 0.342209
v -0.194910 0.068348 0.349675
v -0.192042 0.071896 0.342970
v -0.181459 0.056127 0.328602
v -0.181196 0.056791 0.315500
v -0.184052 0.062678 0.328602
v -0.183789 0.063342 0.315500
v -0.187213 0.070668 0.328602
v -0.186688 0.070668 0.315500
v -0.194755 0.083770 0.339620
v -0.196229 0.091220 0.336816
v -0.192399 0.083770 0.328602
v -0.191873 0.083770 0.315500
v -0.195788 0.092334 0.328602
v -0.195525 0.092998 0.315500
v -0.203136 0.005156 0.358623
v -0.203136 0.018258 0.358508
v -0.216238 0.005156 0.358623
v -0.216238 0.018258 0.358623
v -0.203136 0.031361 0.358153
v -0.203136 0.044463 0.357546
v -0.216238 0.031361 0.358623
v -0.216238 0.044463 0.358623
v -0.229341 0.005156 0.358623
v -0.229341 0.018258 0.358623
v -0.242443 0.005156 0.358623
v -0.242443 0.018258 0.358623
v -0.229341 0.031361 0.358623
v -0.229341 0.044463 0.358623
v -0.242443 0.031361 0.358623
v -0.242443 0.044463 0.358623
v -0.203136 0.057565 0.356145
v -0.201858 0.071896 0.352697
v -0.196639 0.077083 0.348181
v -0.216238 0.057565 0.358395
v -0.216238 0.070668 0.357926
v -0.204513 0.083770 0.351868
v -0.197962 0.083770 0.346171
v -0.207105 0.096872 0.350428
v -0.200584 0.096102 0.341392
v -0.216238 0.083770 0.356950
v -0.216238 0.096872 0.355168
v -0.198381 0.098885 0.328602
v -0.198118 0.099550 0.315500
v -0.229341 0.057565 0.358623
v -0.229341 0.070668 0.358623
v -0.242443 0.057565 0.358623
v -0.242443 0.070668 0.358623
v -0.229341 0.083770 0.358521
v -0.229341 0.096872 0.358179
v -0.242443 0.083770 0.358623
v -0.242443 0.096872 0.358623
v -0.208830 0.105589 0.349167
v -0.206616 0.109964 0.342287
v -0.208421 0.119726 0.338308
v -0.215451 0.109964 0.352133
v -0.210559 0.114324 0.347043
v -0.218842 0.123077 0.351276
v -0.212047 0.123687 0.342287
v -0.202769 0.109975 0.328602
v -0.202244 0.109975 0.315500
v -0.207525 0.121990 0.328602
v -0.207262 0.122655 0.315500
v -0.210117 0.128542 0.328602
v -0.209854 0.129206 0.315500
v -0.221434 0.136179 0.349404
v -0.216872 0.136179 0.341705
v -0.222750 0.142830 0.348310
v -0.221190 0.148031 0.341604
v -0.213140 0.136179 0.328602
v -0.212614 0.136179 0.315500
v -0.218325 0.149282 0.328602
v -0.217799 0.149282 0.315500
v -0.229341 0.109975 0.357602
v -0.229341 0.123077 0.356245
v -0.242443 0.109975 0.358623
v -0.242443 0.123077 0.358408
v -0.229341 0.136179 0.353917
v -0.229044 0.148031 0.351223
v -0.224479 0.151565 0.345904
v -0.242443 0.136179 0.357952
v -0.242443 0.149282 0.357019
v -0.222341 0.156967 0.337169
v -0.221854 0.158198 0.328602
v -0.221591 0.158862 0.315500
v -0.233171 0.162384 0.350514
v -0.226621 0.161754 0.341604
v -0.234942 0.171336 0.349225
v -0.232654 0.175616 0.342365
v -0.242443 0.162384 0.355280
v -0.241600 0.175616 0.352212
v -0.236670 0.180071 0.347172
v -0.224446 0.164749 0.328602
v -0.224183 0.165413 0.315500
v -0.228696 0.175486 0.328602
v -0.228170 0.175486 0.315500
v -0.234532 0.185472 0.338437
v -0.244907 0.188589 0.351363
v -0.238084 0.189339 0.342365
v -0.247499 0.201691 0.349545
v -0.242798 0.201691 0.341705
v -0.233590 0.187854 0.328602
v -0.233327 0.188518 0.315500
v -0.236183 0.194405 0.328602
v -0.235920 0.195069 0.315500
v -0.239066 0.201691 0.328602
v -0.238540 0.201691 0.315500
v -0.255545 0.005156 0.358291
v -0.255545 0.018258 0.358579
v -0.268648 0.005156 0.355665
v -0.268648 0.018258 0.357269
v -0.255545 0.031361 0.358623
v -0.255545 0.044463 0.358623
v -0.268648 0.031361 0.358056
v -0.268648 0.044463 0.358461
v -0.278409 0.005156 0.350813
v -0.285050 0.005282 0.341892
v -0.282251 0.018957 0.351696
v -0.286953 0.015056 0.346384
v -0.289096 0.009733 0.337649
v -0.288711 0.023791 0.348825
v -0.290556 0.018957 0.341892
v -0.287119 0.001541 0.328602
v -0.287382 0.000887 0.315500
v -0.289757 0.008092 0.328602
v -0.290020 0.007438 0.315500
v -0.293849 0.018258 0.328602
v -0.294376 0.018258 0.315500
v -0.281750 0.031361 0.354591
v -0.281750 0.044463 0.356638
v -0.290235 0.031361 0.349974
v -0.295384 0.031361 0.341705
v -0.292873 0.044463 0.351616
v -0.299786 0.043236 0.342648
v -0.299403 0.032231 0.329756
v -0.299209 0.030261 0.315500
v -0.301348 0.038051 0.334892
v -0.255545 0.057565 0.358623
v -0.255545 0.070668 0.358623
v -0.268648 0.057565 0.358623
v -0.268648 0.070668 0.358623
v -0.255545 0.083770 0.358623
v -0.255545 0.096872 0.358623
v -0.268648 0.083770 0.358623
v -0.268648 0.096872 0.358623
v -0.281750 0.057565 0.357820
v -0.281750 0.070668 0.358307
v -0.295898 0.056911 0.352478
v -0.300963 0.052108 0.347644
v -0.294852 0.070668 0.355734
v -0.281750 0.083770 0.358587
v -0.281750 0.096872 0.358623
v -0.294852 0.083770 0.357311
v -0.294852 0.096872 0.358072
v -0.303106 0.046785 0.338909
v -0.301699 0.037179 0.326157
v -0.301846 0.036812 0.315500
v -0.303834 0.043236 0.329756
v -0.304926 0.044463 0.315500
v -0.302721 0.060843 0.349451
v -0.305292 0.056911 0.342648
v -0.304699 0.070668 0.350866
v -0.311357 0.070708 0.341939
v -0.315358 0.075103 0.337728
v -0.309675 0.057565 0.328602
v -0.310202 0.057565 0.315500
v -0.313409 0.066840 0.328602
v -0.313673 0.066186 0.315500
v -0.316047 0.073391 0.328602
v -0.316310 0.072737 0.315500
v -0.308490 0.084384 0.351771
v -0.313215 0.080426 0.346463
v -0.307955 0.096872 0.354693
v -0.314973 0.089161 0.348904
v -0.316863 0.084384 0.341939
v -0.316525 0.096872 0.350061
v -0.322929 0.098181 0.340397
v -0.320225 0.083770 0.328602
v -0.320752 0.083770 0.315500
v -0.325236 0.096214 0.328602
v -0.325499 0.095560 0.315500
v -0.327609 0.103421 0.335158
v -0.327873 0.102765 0.328602
v -0.328137 0.102111 0.315500
v -0.255545 0.109975 0.358623
v -0.255545 0.123077 0.358623
v -0.268648 0.109975 0.358623
v -0.268648 0.123077 0.358623
v -0.255545 0.136179 0.358623
v -0.255545 0.149282 0.358534
v -0.268648 0.136179 0.358623
v -0.268648 0.149282 0.358623
v -0.281750 0.109975 0.358623
v -0.281750 0.123077 0.358623
v -0.294852 0.109975 0.358469
v -0.294852 0.123077 0.358623
v -0.281750 0.136179 0.358623
v -0.281750 0.149282 0.358623
v -0.294852 0.136179 0.358623
v -0.294852 0.149282 0.358623
v -0.255545 0.162384 0.358205
v -0.255545 0.175486 0.357658
v -0.268648 0.162384 0.358623
v -0.268648 0.175486 0.358623
v -0.255545 0.188589 0.356344
v -0.255545 0.201691 0.354083
v -0.268648 0.188589 0.358421
v -0.268648 0.201691 0.357978
v -0.281750 0.162384 0.358623
v -0.281750 0.175486 0.358623
v -0.294852 0.162384 0.358623
v -0.294852 0.175486 0.358623
v -0.281750 0.188589 0.358623
v -0.281750 0.201691 0.358623
v -0.294852 0.188589 0.358623
v -0.294852 0.201691 0.358623
v -0.307955 0.109975 0.356680
v -0.307955 0.123077 0.357836
v -0.319163 0.109975 0.351651
v -0.325714 0.109975 0.344585
v -0.322137 0.122338 0.352512
v -0.327225 0.117478 0.347723
v -0.307955 0.136179 0.358323
v -0.307955 0.149282 0.358595
v -0.321057 0.136179 0.355803
v -0.321057 0.149282 0.357354
v -0.328929 0.109975 0.338033
v -0.328983 0.126213 0.349487
v -0.331600 0.122338 0.342695
v -0.330776 0.109975 0.328602
v -0.331302 0.109975 0.315500
v -0.336051 0.123077 0.328602
v -0.336578 0.123077 0.315500
v -0.330989 0.136179 0.350919
v -0.337665 0.136135 0.341987
v -0.334729 0.149811 0.351832
v -0.339476 0.145796 0.346542
v -0.341619 0.140473 0.337807
v -0.341235 0.154531 0.348960
v -0.343171 0.149811 0.341987
v -0.339700 0.132139 0.328602
v -0.339963 0.131485 0.315500
v -0.342337 0.138690 0.328602
v -0.342601 0.138036 0.315500
v -0.346601 0.149282 0.328602
v -0.347128 0.149282 0.315500
v -0.307955 0.162384 0.358623
v -0.307955 0.175486 0.358623
v -0.321057 0.162384 0.358087
v -0.321057 0.175486 0.358477
v -0.307955 0.188589 0.358623
v -0.307955 0.201691 0.358623
v -0.321057 0.188589 0.358623
v -0.321057 0.201691 0.358623
v -0.334159 0.162384 0.354777
v -0.334159 0.175486 0.356723
v -0.342816 0.162384 0.350129
v -0.349236 0.163607 0.340557
v -0.345453 0.175486 0.351685
v -0.352004 0.175486 0.344844
v -0.351526 0.161513 0.328602
v -0.351789 0.160859 0.315500
v -0.334159 0.188589 0.357852
v -0.334159 0.201691 0.358339
v -0.348376 0.187765 0.352545
v -0.353486 0.182848 0.347803
v -0.347262 0.201691 0.355872
v -0.248862 0.208576 0.348440
v -0.247228 0.213684 0.341682
v -0.248453 0.222713 0.337299
v -0.244251 0.214793 0.328602
v -0.243726 0.214793 0.315500
v -0.247919 0.224061 0.328602
v -0.247656 0.224725 0.315500
v -0.255193 0.213684 0.351346
v -0.250590 0.217311 0.346034
v -0.259236 0.227896 0.350601
v -0.252659 0.227406 0.341682
v -0.268648 0.214793 0.357088
v -0.268648 0.227896 0.355393
v -0.250512 0.230612 0.328602
v -0.250249 0.231276 0.315500
v -0.261054 0.237082 0.349282
v -0.258691 0.241269 0.342442
v -0.260644 0.251218 0.338567
v -0.267749 0.241269 0.352292
v -0.262782 0.245817 0.347301
v -0.270972 0.254100 0.350769
v -0.264122 0.254992 0.342442
v -0.254622 0.240998 0.328602
v -0.254096 0.240998 0.315500
v -0.260099 0.254992 0.329138
v -0.259281 0.254100 0.315500
v -0.262373 0.259953 0.333862
v -0.281750 0.214793 0.358547
v -0.281750 0.227896 0.358231
v -0.294852 0.214793 0.358623
v -0.294852 0.227896 0.358623
v -0.281750 0.240998 0.357368
v -0.281750 0.254100 0.353527
v -0.294852 0.240998 0.357929
v -0.294852 0.254100 0.353772
v -0.273245 0.261109 0.348940
v -0.270665 0.262828 0.341705
v -0.262022 0.260839 0.325127
v -0.261985 0.260933 0.315500
v -0.267503 0.263894 0.329138
v -0.268648 0.265089 0.315500
v -0.281750 0.261337 0.349282
v -0.281750 0.265005 0.341705
v -0.294852 0.261337 0.349282
v -0.294852 0.265005 0.341705
v -0.281750 0.268476 0.328602
v -0.281750 0.268965 0.315500
v -0.294852 0.268476 0.328602
v -0.294852 0.268965 0.315500
v -0.307955 0.214793 0.358623
v -0.307955 0.227896 0.358623
v -0.321057 0.214793 0.358623
v -0.321057 0.227896 0.358623
v -0.307955 0.240998 0.357929
v -0.307955 0.254100 0.353772
v -0.321057 0.240998 0.357929
v -0.321057 0.254100 0.353772
v -0.334159 0.214793 0.358603
v -0.334159 0.227896 0.358623
v -0.347262 0.214793 0.357396
v -0.347262 0.227896 0.358103
v -0.334159 0.240998 0.357929
v -0.334159 0.254100 0.353772
v -0.347262 0.240998 0.357791
v -0.347262 0.254100 0.353772
v -0.307955 0.261337 0.349283
v -0.307955 0.265005 0.341705
v -0.321057 0.261337 0.349283
v -0.321057 0.265005 0.341705
v -0.307955 0.268476 0.328602
v -0.307955 0.268965 0.315500
v -0.321057 0.268476 0.328602
v -0.321057 0.268965 0.315500
v -0.334159 0.261337 0.349283
v -0.334159 0.265005 0.341705
v -0.347262 0.261337 0.349283
v -0.347262 0.265005 0.341705
v -0.334159 0.268476 0.328602
v -0.334159 0.268965 0.315500
v -0.347262 0.268476 0.328602
v -0.347262 0.268965 0.315500
v -0.353871 0.168790 0.335425
v -0.355219 0.175486 0.338293
v -0.354164 0.168064 0.328602
v -0.354427 0.167410 0.315500
v -0.357152 0.175486 0.328602
v -0.357678 0.175486 0.315500
v -0.355245 0.191583 0.349522
v -0.357907 0.187765 0.342743
v -0.357280 0.201691 0.350972
v -0.363972 0.201562 0.342034
v -0.367881 0.205843 0.337887
v -0.362427 0.188589 0.328602
v -0.362953 0.188589 0.315500
v -0.365990 0.197438 0.328602
v -0.366253 0.196784 0.315500
v -0.368627 0.203989 0.328602
v -0.368891 0.203335 0.315500
v -0.360968 0.215237 0.351881
v -0.365738 0.211166 0.346622
v -0.360364 0.227896 0.354846
v -0.367497 0.219901 0.348995
v -0.369478 0.215237 0.342034
v -0.369106 0.227896 0.350182
v -0.375543 0.229034 0.340717
v -0.372977 0.214793 0.328602
v -0.373504 0.214793 0.315500
v -0.377816 0.226812 0.328602
v -0.378079 0.226158 0.315500
v -0.360364 0.240998 0.356418
v -0.360364 0.254100 0.353620
v -0.371744 0.240998 0.351720
v -0.378295 0.240998 0.345103
v -0.374615 0.253191 0.350751
v -0.379748 0.248218 0.347882
v -0.380133 0.234160 0.335691
v -0.380454 0.233363 0.328602
v -0.380717 0.232709 0.315500
v -0.381509 0.240998 0.338552
v -0.381507 0.256953 0.348940
v -0.384214 0.253191 0.342790
v -0.383528 0.240998 0.328602
v -0.384054 0.240998 0.315500
v -0.388803 0.254100 0.328602
v -0.389329 0.254100 0.315500
v -0.360364 0.261337 0.349283
v -0.360364 0.265005 0.341705
v -0.373467 0.261337 0.349283
v -0.373467 0.265005 0.341705
v -0.360364 0.268476 0.328602
v -0.360364 0.268965 0.315500
v -0.373467 0.268476 0.328602
v -0.373467 0.268965 0.315500
v -0.381507 0.261109 0.348940
v -0.385711 0.263860 0.340394
v -0.388193 0.265868 0.328602
v -0.388368 0.266194 0.315500
v 0.380958 0.153241 0.302397
v 0.380694 0.153898 0.289295
v 0.380260 0.154981 0.281150
v 0.384626 0.162384 0.302397
v 0.384099 0.162384 0.289295
v 0.389882 0.175486 0.302397
v 0.389355 0.175486 0.289295
v 0.381745 0.162384 0.278323
v 0.384504 0.174249 0.274923
v 0.381622 0.177791 0.268207
v 0.395393 0.189225 0.302397
v 0.395130 0.189882 0.289295
v 0.400394 0.201691 0.302397
v 0.399867 0.201691 0.289295
v 0.392765 0.182674 0.302397
v 0.392502 0.183331 0.289295
v 0.394251 0.192072 0.279643
v 0.396052 0.201745 0.275642
v 0.393861 0.206148 0.268742
v 0.390562 0.188058 0.275642
v 0.383787 0.188589 0.266675
v 0.392109 0.197413 0.270908
v 0.387232 0.201745 0.265793
v 0.328472 0.022408 0.302397
v 0.328209 0.023065 0.289295
v 0.327800 0.024084 0.281387
v 0.332064 0.031361 0.302397
v 0.331537 0.031361 0.289295
v 0.337320 0.044463 0.302397
v 0.336793 0.044463 0.289295
v 0.329259 0.031361 0.278554
v 0.332003 0.043301 0.274965
v 0.329162 0.046894 0.268238
v 0.354715 0.087825 0.302397
v 0.354452 0.088481 0.289295
v 0.358345 0.096872 0.302397
v 0.357818 0.096872 0.289295
v 0.354030 0.089532 0.281268
v 0.355502 0.096872 0.278439
v 0.342908 0.058392 0.302397
v 0.342644 0.059049 0.289295
v 0.347832 0.070668 0.302397
v 0.347305 0.070668 0.289295
v 0.340280 0.051841 0.302397
v 0.340016 0.052497 0.289295
v 0.341791 0.061176 0.279713
v 0.343552 0.070797 0.275685
v 0.341401 0.075251 0.268774
v 0.338061 0.057111 0.275685
v 0.331302 0.057565 0.266722
v 0.339649 0.066516 0.270979
v 0.334793 0.070797 0.265837
v 0.352087 0.081273 0.302397
v 0.351823 0.081930 0.289295
v 0.349610 0.084607 0.276617
v 0.343109 0.083770 0.267525
v 0.352289 0.096872 0.271887
v 0.345737 0.096872 0.266057
v 0.334060 0.083770 0.262805
v 0.334060 0.096872 0.260985
v 0.321551 0.005156 0.302397
v 0.321024 0.005156 0.289295
v 0.325844 0.015857 0.302397
v 0.325581 0.016513 0.289295
v 0.317301 0.005323 0.275706
v 0.315170 0.009802 0.268789
v 0.323359 0.019133 0.276689
v 0.316867 0.018258 0.267549
v 0.313419 0.001068 0.271014
v 0.308573 0.005323 0.265858
v 0.307855 0.018258 0.262836
v 0.326046 0.031361 0.272003
v 0.319495 0.031361 0.266072
v 0.327410 0.038159 0.269779
v 0.322208 0.043301 0.265221
v 0.307855 0.031361 0.261003
v 0.307855 0.044463 0.259986
v 0.294753 0.005156 0.260369
v 0.294753 0.018258 0.259747
v 0.281651 0.005156 0.259277
v 0.281651 0.018258 0.259277
v 0.294753 0.031361 0.259391
v 0.294753 0.044463 0.259277
v 0.281651 0.031361 0.259277
v 0.281651 0.044463 0.259277
v 0.320958 0.057565 0.261773
v 0.320958 0.070668 0.260354
v 0.307855 0.057565 0.259510
v 0.307855 0.070668 0.259277
v 0.320958 0.083770 0.259740
v 0.320958 0.096872 0.259387
v 0.307855 0.083770 0.259277
v 0.307855 0.096872 0.259277
v 0.294753 0.057565 0.259277
v 0.294753 0.070668 0.259277
v 0.281651 0.057565 0.259277
v 0.281651 0.070668 0.259277
v 0.294753 0.083770 0.259277
v 0.294753 0.096872 0.259277
v 0.281651 0.083770 0.259277
v 0.281651 0.096872 0.259277
v 0.369150 0.123809 0.302397
v 0.368887 0.124465 0.289295
v 0.363601 0.109975 0.302397
v 0.363074 0.109975 0.289295
v 0.366522 0.117257 0.302397
v 0.366259 0.117914 0.289295
v 0.368021 0.126624 0.279678
v 0.358254 0.108775 0.274944
v 0.355392 0.112343 0.268223
v 0.364312 0.122585 0.275664
v 0.357545 0.123077 0.266699
v 0.374113 0.136179 0.302397
v 0.373586 0.136179 0.289295
v 0.378330 0.146690 0.302397
v 0.378066 0.147347 0.289295
v 0.369802 0.136271 0.275664
v 0.367631 0.140699 0.268758
v 0.375860 0.150081 0.276547
v 0.369352 0.149282 0.267501
v 0.365879 0.131965 0.270943
v 0.361013 0.136271 0.265815
v 0.360265 0.149282 0.262775
v 0.353640 0.103608 0.269744
v 0.348428 0.108775 0.265206
v 0.347162 0.123077 0.261746
v 0.334060 0.109975 0.259979
v 0.334060 0.123077 0.259507
v 0.347162 0.136179 0.260339
v 0.347162 0.149282 0.259733
v 0.334060 0.136179 0.259277
v 0.334060 0.149282 0.259277
v 0.378531 0.162384 0.271772
v 0.371980 0.162384 0.266042
v 0.379870 0.169056 0.269709
v 0.374648 0.174249 0.265191
v 0.360265 0.162384 0.260966
v 0.360265 0.175486 0.259972
v 0.373367 0.188589 0.261719
v 0.373367 0.201691 0.260324
v 0.360265 0.188589 0.259503
v 0.360265 0.201691 0.259277
v 0.347162 0.162384 0.259384
v 0.347162 0.175486 0.259277
v 0.334060 0.162384 0.259277
v 0.334060 0.175486 0.259277
v 0.347162 0.188589 0.259277
v 0.347162 0.201691 0.259277
v 0.334060 0.188589 0.259277
v 0.334060 0.201691 0.259277
v 0.320958 0.109975 0.259277
v 0.320958 0.123077 0.259277
v 0.307855 0.109975 0.259277
v 0.307855 0.123077 0.259277
v 0.320958 0.136179 0.259277
v 0.320958 0.149282 0.259277
v 0.307855 0.136179 0.259277
v 0.307855 0.149282 0.259277
v 0.294753 0.109975 0.259277
v 0.294753 0.123077 0.259277
v 0.281651 0.109975 0.259277
v 0.281651 0.123077 0.259277
v 0.294753 0.136179 0.259277
v 0.294753 0.149282 0.259277
v 0.281651 0.136179 0.259353
v 0.281651 0.149282 0.259670
v 0.320958 0.162384 0.259277
v 0.320958 0.175486 0.259277
v 0.307855 0.162384 0.259277
v 0.307855 0.175486 0.259277
v 0.320958 0.188589 0.259277
v 0.320958 0.201691 0.259277
v 0.307855 0.188589 0.259277
v 0.307855 0.201691 0.259353
v 0.294753 0.162384 0.259277
v 0.294753 0.175486 0.259474
v 0.281651 0.162384 0.260200
v 0.281651 0.175486 0.261496
v 0.294753 0.188589 0.259912
v 0.294753 0.201691 0.260803
v 0.281651 0.188589 0.263748
v 0.276681 0.204288 0.271839
v 0.281289 0.200629 0.266518
v 0.407201 0.218658 0.302397
v 0.406937 0.219315 0.289295
v 0.410907 0.227896 0.302397
v 0.410380 0.227896 0.289295
v 0.406490 0.220429 0.281031
v 0.407988 0.227896 0.278208
v 0.421636 0.254642 0.302397
v 0.421373 0.255299 0.289295
v 0.416163 0.240998 0.302397
v 0.415636 0.240998 0.289295
v 0.419008 0.248091 0.302397
v 0.418745 0.248747 0.289295
v 0.420481 0.257521 0.279608
v 0.410754 0.239723 0.274902
v 0.407852 0.243240 0.268191
v 0.416812 0.253532 0.275621
v 0.410030 0.254100 0.268041
v 0.404573 0.212107 0.302397
v 0.404309 0.212763 0.289295
v 0.402110 0.215554 0.276475
v 0.395595 0.214793 0.267478
v 0.404774 0.227896 0.271657
v 0.398223 0.227896 0.266026
v 0.386469 0.214793 0.262744
v 0.386469 0.227896 0.260947
v 0.406100 0.234505 0.269674
v 0.400868 0.239723 0.265275
v 0.399572 0.254100 0.265284
v 0.386469 0.240998 0.260436
v 0.386469 0.254100 0.264128
v 0.421636 0.264808 0.302397
v 0.421373 0.264564 0.289295
v 0.412674 0.268965 0.302397
v 0.412674 0.268476 0.289295
v 0.420481 0.263096 0.279608
v 0.413452 0.263859 0.275621
v 0.409604 0.261108 0.268958
v 0.399572 0.268965 0.302397
v 0.399572 0.268476 0.289295
v 0.386469 0.268965 0.302397
v 0.386469 0.268476 0.289295
v 0.399572 0.265003 0.276193
v 0.399572 0.261336 0.268616
v 0.386469 0.265003 0.276193
v 0.386469 0.261336 0.268616
v 0.373367 0.214793 0.259725
v 0.373367 0.227896 0.259380
v 0.360265 0.214793 0.259277
v 0.360265 0.227896 0.259277
v 0.373367 0.240998 0.259971
v 0.373367 0.254100 0.264128
v 0.360265 0.240998 0.259971
v 0.360265 0.254100 0.264128
v 0.347162 0.214793 0.259277
v 0.347162 0.227896 0.259277
v 0.334060 0.214793 0.259277
v 0.334060 0.227896 0.259277
v 0.347162 0.240998 0.259971
v 0.347162 0.254100 0.264128
v 0.334060 0.240998 0.259971
v 0.334060 0.254100 0.264128
v 0.373367 0.268965 0.302397
v 0.373367 0.268476 0.289295
v 0.360265 0.268965 0.302397
v 0.360265 0.268476 0.289295
v 0.373367 0.265003 0.276193
v 0.373367 0.261336 0.268616
v 0.360265 0.265003 0.276193
v 0.360265 0.261336 0.268616
v 0.347162 0.268965 0.302397
v 0.347162 0.268476 0.289295
v 0.334060 0.268965 0.302397
v 0.334060 0.268476 0.289295
v 0.347162 0.265003 0.276193
v 0.347162 0.261336 0.268616
v 0.334060 0.265003 0.276193
v 0.334060 0.261336 0.268616
v 0.320958 0.214793 0.259277
v 0.320958 0.227896 0.259277
v 0.307855 0.214793 0.259670
v 0.307855 0.227896 0.260200
v 0.320958 0.240998 0.259971
v 0.320958 0.254100 0.264128
v 0.307855 0.240998 0.261647
v 0.307855 0.254100 0.265539
v 0.276352 0.218213 0.302397
v 0.276616 0.217554 0.289295
v 0.280225 0.227896 0.302397
v 0.280752 0.227896 0.289295
v 0.294753 0.214793 0.262506
v 0.288910 0.232677 0.270625
v 0.293867 0.228144 0.265620
v 0.278757 0.214324 0.276201
v 0.285333 0.214793 0.267295
v 0.284809 0.228144 0.275473
v 0.287163 0.223942 0.268619
v 0.288515 0.246767 0.284203
v 0.290765 0.254244 0.302397
v 0.290650 0.252847 0.288861
v 0.285466 0.240998 0.302397
v 0.286247 0.241839 0.288861
v 0.288144 0.247693 0.302397
v 0.288163 0.247645 0.292939
v 0.290287 0.241839 0.275473
v 0.297125 0.240998 0.266482
v 0.294974 0.254100 0.276193
v 0.299745 0.254100 0.268295
v 0.286768 0.238032 0.279360
v 0.320958 0.268965 0.302397
v 0.320958 0.268476 0.289295
v 0.307855 0.268965 0.302397
v 0.307855 0.268476 0.289295
v 0.320958 0.265003 0.276193
v 0.320958 0.261336 0.268616
v 0.307855 0.264972 0.276193
v 0.307855 0.261304 0.268956
v 0.297316 0.264808 0.302397
v 0.297579 0.264564 0.289295
v 0.299449 0.262796 0.276193
v 0.301138 0.261066 0.269411
v 0.268548 0.005156 0.259277
v 0.268548 0.018258 0.259277
v 0.255446 0.005156 0.259277
v 0.255446 0.018258 0.259277
v 0.268548 0.031361 0.259277
v 0.268548 0.044463 0.259277
v 0.255446 0.031361 0.259277
v 0.255446 0.044463 0.259277
v 0.242344 0.005156 0.259277
v 0.242344 0.018258 0.259277
v 0.229241 0.005156 0.259353
v 0.229241 0.018258 0.259670
v 0.242344 0.031361 0.259277
v 0.242344 0.044463 0.259474
v 0.229241 0.031361 0.260200
v 0.229241 0.044463 0.261496
v 0.268548 0.057565 0.259277
v 0.268548 0.070668 0.259277
v 0.255446 0.057565 0.259277
v 0.255446 0.070668 0.259353
v 0.268548 0.083770 0.259277
v 0.268548 0.096872 0.259277
v 0.255446 0.083770 0.259670
v 0.255446 0.096872 0.260200
v 0.242344 0.057565 0.259913
v 0.242344 0.070668 0.260803
v 0.229241 0.057565 0.263748
v 0.224271 0.073266 0.271839
v 0.228880 0.069606 0.266518
v 0.223943 0.087189 0.302397
v 0.224206 0.086530 0.289295
v 0.227816 0.096872 0.302397
v 0.228343 0.096872 0.289295
v 0.242344 0.083770 0.262505
v 0.236500 0.101654 0.270625
v 0.241458 0.097121 0.265620
v 0.226348 0.083300 0.276201
v 0.232923 0.083770 0.267294
v 0.232400 0.097121 0.275473
v 0.234753 0.092919 0.268618
v 0.197738 0.021677 0.302397
v 0.198002 0.021018 0.289295
v 0.216139 0.005156 0.260803
v 0.216139 0.018258 0.262505
v 0.198067 0.007754 0.271840
v 0.202675 0.004094 0.266518
v 0.200143 0.017788 0.276201
v 0.206718 0.018258 0.267294
v 0.209901 0.050231 0.284204
v 0.201612 0.031361 0.302397
v 0.202139 0.031361 0.289295
v 0.206853 0.044463 0.302397
v 0.207633 0.045303 0.288861
v 0.210295 0.036142 0.270625
v 0.215253 0.031609 0.265620
v 0.211673 0.045303 0.275473
v 0.218511 0.044463 0.266482
v 0.206195 0.031609 0.275473
v 0.208548 0.027408 0.268618
v 0.208154 0.041496 0.279360
v 0.191130 0.005156 0.302397
v 0.191657 0.005156 0.289295
v 0.195118 0.015126 0.302397
v 0.195381 0.014467 0.289295
v 0.173613 0.005156 0.302397
v 0.172596 0.006289 0.288317
v 0.170630 0.012575 0.302397
v 0.170513 0.012285 0.292033
v 0.194665 0.004094 0.276201
v 0.196320 -0.000981 0.269411
v 0.195925 0.013108 0.280574
v 0.171918 0.002677 0.279079
v 0.212151 0.057708 0.302397
v 0.212037 0.056312 0.288861
v 0.217334 0.070668 0.302397
v 0.217861 0.070668 0.289295
v 0.209530 0.051157 0.302397
v 0.209550 0.051110 0.292939
v 0.216360 0.057565 0.276193
v 0.221131 0.057565 0.268295
v 0.220870 0.069606 0.276201
v 0.222524 0.064531 0.269411
v 0.221322 0.080638 0.302397
v 0.221586 0.079979 0.289295
v 0.222130 0.078620 0.280574
v 0.268548 0.109975 0.259474
v 0.268548 0.123077 0.259913
v 0.255446 0.109975 0.261496
v 0.255446 0.123077 0.263748
v 0.250148 0.152701 0.302397
v 0.250411 0.152042 0.289295
v 0.268548 0.136179 0.260803
v 0.268548 0.149282 0.262505
v 0.250476 0.138777 0.271839
v 0.255085 0.135117 0.266518
v 0.252552 0.148812 0.276201
v 0.259128 0.149282 0.267294
v 0.236105 0.115744 0.284204
v 0.238355 0.123220 0.302397
v 0.238241 0.121824 0.288861
v 0.233057 0.109975 0.302397
v 0.233838 0.110815 0.288861
v 0.235735 0.116669 0.302397
v 0.235754 0.116621 0.292939
v 0.237878 0.110815 0.275473
v 0.244716 0.109975 0.266482
v 0.242564 0.123077 0.276193
v 0.247336 0.123077 0.268295
v 0.234358 0.107009 0.279361
v 0.243539 0.136179 0.302397
v 0.244066 0.136179 0.289295
v 0.247527 0.146149 0.302397
v 0.247791 0.145491 0.289295
v 0.247074 0.135117 0.276201
v 0.248729 0.130042 0.269411
v 0.248334 0.144132 0.280574
v 0.262310 0.181255 0.284204
v 0.254021 0.162384 0.302397
v 0.254548 0.162384 0.289295
v 0.259262 0.175486 0.302397
v 0.260042 0.176327 0.288861
v 0.262705 0.167165 0.270625
v 0.267663 0.162632 0.265620
v 0.264083 0.176327 0.275473
v 0.270920 0.175486 0.266482
v 0.258604 0.162632 0.275473
v 0.260958 0.158430 0.268618
v 0.260563 0.172520 0.279360
v 0.264560 0.188732 0.302397
v 0.264446 0.187336 0.288861
v 0.269744 0.201691 0.302397
v 0.270270 0.201691 0.289295
v 0.261940 0.182181 0.302397
v 0.261959 0.182133 0.292939
v 0.268769 0.188589 0.276193
v 0.273541 0.188589 0.268295
v 0.273279 0.200629 0.276201
v 0.274934 0.195553 0.269411
v 0.170162 0.011412 0.283298
v 0.167995 0.019126 0.302397
v 0.168170 0.017295 0.288317
v 0.168548 0.006289 0.275304
v 0.161653 0.005156 0.266320
v 0.164075 0.018258 0.276193
v 0.159019 0.018258 0.268016
v 0.150627 0.005156 0.261308
v 0.150627 0.018258 0.263418
v 0.163075 0.031361 0.302397
v 0.162548 0.031361 0.289295
v 0.158810 0.041968 0.302397
v 0.158546 0.041313 0.289295
v 0.156175 0.048519 0.302397
v 0.155912 0.047864 0.289295
v 0.159325 0.030571 0.276055
v 0.157527 0.025677 0.269157
v 0.157915 0.039742 0.280330
v 0.155771 0.034412 0.271595
v 0.151093 0.030571 0.266281
v 0.153824 0.044251 0.276055
v 0.147199 0.044463 0.267138
v 0.137525 0.005156 0.259448
v 0.137525 0.018258 0.259862
v 0.124422 0.005156 0.259277
v 0.124422 0.018258 0.259277
v 0.137525 0.031361 0.260674
v 0.137525 0.044463 0.262303
v 0.124422 0.031361 0.259329
v 0.124422 0.044463 0.259625
v 0.152538 0.057565 0.302397
v 0.152011 0.057565 0.289295
v 0.147269 0.070668 0.302397
v 0.146308 0.071731 0.288447
v 0.147761 0.058051 0.275343
v 0.145280 0.054007 0.268517
v 0.145667 0.068073 0.279144
v 0.144355 0.077913 0.302397
v 0.144262 0.077682 0.292249
v 0.143911 0.076808 0.283514
v 0.143524 0.062743 0.270409
v 0.138504 0.058051 0.265488
v 0.142260 0.071731 0.275343
v 0.135379 0.070668 0.266348
v 0.124422 0.057565 0.260111
v 0.124422 0.070668 0.261343
v 0.141721 0.084464 0.302397
v 0.141882 0.082737 0.288447
v 0.136731 0.096872 0.302397
v 0.136204 0.096872 0.289295
v 0.137731 0.083770 0.276193
v 0.132745 0.083770 0.268086
v 0.133037 0.096013 0.276094
v 0.131276 0.091073 0.269221
v 0.124423 0.083770 0.263500
v 0.129520 0.099808 0.271660
v 0.124860 0.096013 0.266342
v 0.111320 0.005156 0.259277
v 0.111320 0.018258 0.259277
v 0.098218 0.005156 0.259277
v 0.098218 0.018258 0.259277
v 0.111320 0.031361 0.259277
v 0.111320 0.044463 0.259277
v 0.098218 0.031361 0.259277
v 0.098218 0.044463 0.259277
v 0.085115 0.005156 0.259277
v 0.085115 0.018258 0.259277
v 0.072013 0.005156 0.260037
v 0.072013 0.018258 0.259548
v 0.085115 0.031361 0.259277
v 0.085115 0.044463 0.259277
v 0.072013 0.031361 0.259290
v 0.072013 0.044463 0.259277
v 0.111320 0.057565 0.259277
v 0.111320 0.070668 0.259454
v 0.098218 0.057565 0.259277
v 0.098218 0.070668 0.259277
v 0.111320 0.083770 0.259874
v 0.111320 0.096872 0.260709
v 0.098218 0.083770 0.259277
v 0.098218 0.096872 0.259336
v 0.085115 0.057565 0.259277
v 0.085115 0.070668 0.259277
v 0.072013 0.057565 0.259277
v 0.072013 0.070668 0.259277
v 0.085115 0.083770 0.259277
v 0.085115 0.096872 0.259277
v 0.072013 0.083770 0.259277
v 0.072013 0.096872 0.259277
v 0.132535 0.107307 0.302397
v 0.132272 0.106651 0.289295
v 0.129901 0.113858 0.302397
v 0.129637 0.113203 0.289295
v 0.126194 0.123077 0.302397
v 0.125667 0.123077 0.289295
v 0.131663 0.105138 0.280395
v 0.127536 0.109693 0.276094
v 0.120925 0.109975 0.267181
v 0.121473 0.123494 0.275381
v 0.119029 0.119404 0.268546
v 0.120925 0.136179 0.302397
v 0.120020 0.137174 0.288577
v 0.118081 0.143252 0.302397
v 0.118011 0.143078 0.292466
v 0.119416 0.133469 0.279208
v 0.111320 0.109975 0.262359
v 0.117273 0.128139 0.270473
v 0.112271 0.123494 0.265524
v 0.098218 0.109975 0.259638
v 0.098218 0.123077 0.260134
v 0.117660 0.142204 0.283731
v 0.115447 0.149803 0.302397
v 0.115594 0.148180 0.288577
v 0.115972 0.137174 0.275381
v 0.109105 0.136179 0.266386
v 0.111387 0.149282 0.276193
v 0.106470 0.149282 0.268155
v 0.098218 0.136179 0.261388
v 0.098218 0.149282 0.263583
v 0.085115 0.109975 0.259277
v 0.085115 0.123077 0.259277
v 0.072013 0.109975 0.259277
v 0.072013 0.123077 0.259277
v 0.085115 0.136179 0.259461
v 0.085115 0.149282 0.259887
v 0.072013 0.136179 0.259277
v 0.072013 0.149282 0.259277
v 0.110387 0.162384 0.302397
v 0.109860 0.162384 0.289295
v 0.106261 0.172645 0.302397
v 0.105998 0.171990 0.289295
v 0.103627 0.179196 0.302397
v 0.103363 0.178541 0.289295
v 0.106749 0.161456 0.276132
v 0.105025 0.156470 0.269286
v 0.105412 0.170535 0.280459
v 0.103269 0.165205 0.271724
v 0.098628 0.161456 0.266403
v 0.101247 0.175136 0.276132
v 0.094651 0.175486 0.267224
v 0.099850 0.188589 0.302397
v 0.099323 0.188589 0.289295
v 0.094581 0.201691 0.302397
v 0.093731 0.202616 0.288707
v 0.095185 0.188936 0.275420
v 0.092778 0.184801 0.268574
v 0.093165 0.198865 0.279272
v 0.085115 0.162384 0.260743
v 0.085115 0.175486 0.262415
v 0.072013 0.162384 0.259342
v 0.072013 0.175486 0.259650
v 0.091409 0.207601 0.283947
v 0.091022 0.193536 0.270537
v 0.086039 0.188936 0.265563
v 0.089684 0.202616 0.275420
v 0.082831 0.201691 0.266430
v 0.072013 0.188589 0.260162
v 0.072013 0.201691 0.261437
v 0.273732 0.211661 0.302397
v 0.273995 0.211003 0.289295
v 0.274539 0.209644 0.280574
v 0.091807 0.208590 0.302397
v 0.091760 0.208474 0.292682
v 0.089172 0.215142 0.302397
v 0.089306 0.213622 0.288707
v 0.084044 0.227896 0.302397
v 0.083517 0.227896 0.289295
v 0.085043 0.214793 0.276193
v 0.080196 0.214793 0.268225
v 0.080460 0.226899 0.276171
v 0.078774 0.221866 0.269350
v 0.072013 0.214793 0.263666
v 0.077018 0.230601 0.271789
v 0.072396 0.226899 0.266464
v 0.079987 0.237984 0.302397
v 0.079723 0.237329 0.289295
v 0.077352 0.244535 0.302397
v 0.077089 0.243880 0.289295
v 0.073506 0.254100 0.302397
v 0.072979 0.254100 0.289295
v 0.079161 0.235931 0.280524
v 0.074959 0.240578 0.276171
v 0.068377 0.240998 0.267268
v 0.068897 0.254379 0.275459
v 0.066527 0.250197 0.268603
v 0.068167 0.264808 0.302397
v 0.067903 0.264564 0.289295
v 0.066914 0.263096 0.279337
v 0.043071 0.005156 0.302397
v 0.043599 0.005156 0.289295
v 0.039837 0.013139 0.302397
v 0.040101 0.013791 0.289295
v 0.052646 -0.000689 0.270038
v 0.057772 0.004269 0.265326
v 0.058911 0.018258 0.261963
v 0.048177 0.004269 0.275121
v 0.050877 0.008045 0.268345
v 0.042101 0.018042 0.275811
v 0.048809 0.018258 0.266875
v 0.058911 0.031361 0.260459
v 0.058911 0.044463 0.259777
v 0.040373 0.027564 0.271189
v 0.045168 0.031703 0.265962
v 0.045808 0.044463 0.262963
v 0.037184 0.019690 0.302397
v 0.037448 0.020342 0.289295
v 0.038227 0.022266 0.279924
v 0.032457 0.031361 0.302397
v 0.032985 0.031361 0.289295
v 0.027979 0.042416 0.302397
v 0.028243 0.043068 0.289295
v 0.025326 0.048967 0.302397
v 0.025590 0.049619 0.289295
v 0.036568 0.031703 0.275811
v 0.038604 0.036299 0.268859
v 0.030492 0.045476 0.276943
v 0.036951 0.044463 0.267646
v 0.025954 0.050519 0.281810
v 0.058911 0.057565 0.259405
v 0.058911 0.070668 0.259277
v 0.045808 0.057565 0.261074
v 0.045808 0.070668 0.260007
v 0.058911 0.083770 0.259277
v 0.058911 0.096872 0.259277
v 0.045808 0.083770 0.259520
v 0.045808 0.096872 0.259277
v 0.021843 0.057565 0.302397
v 0.022372 0.057565 0.289295
v 0.016121 0.064823 0.302397
v 0.016385 0.065479 0.289295
v 0.027746 0.057565 0.272401
v 0.034297 0.057565 0.266129
v 0.026331 0.064552 0.269886
v 0.031502 0.069619 0.265261
v 0.024527 0.057565 0.278952
v 0.020007 0.069374 0.274777
v 0.024563 0.073287 0.268277
v 0.032706 0.083770 0.261834
v 0.032706 0.096872 0.260381
v 0.015752 0.082230 0.270610
v 0.019220 0.084927 0.267285
v 0.018788 0.095562 0.264659
v -0.010853 0.005979 0.302397
v -0.011116 0.006635 0.289295
v -0.005923 0.018258 0.302397
v -0.006450 0.018258 0.289295
v -0.011970 0.008763 0.279711
v -0.010206 0.018384 0.275683
v -0.012359 0.022835 0.268772
v 0.000958 0.035401 0.302397
v 0.000695 0.036057 0.289295
v 0.004596 0.044463 0.302397
v 0.004069 0.044463 0.289295
v -0.001672 0.028849 0.302397
v -0.001935 0.029505 0.289295
v 0.000271 0.037112 0.281245
v 0.001747 0.044463 0.278416
v -0.004147 0.032191 0.276604
v -0.010648 0.031361 0.267522
v -0.001467 0.044463 0.271864
v -0.008018 0.044463 0.266055
v -0.013482 -0.000572 0.302397
v -0.013746 0.000084 0.289295
v -0.015700 0.004700 0.275683
v -0.022459 0.005156 0.266721
v -0.014113 0.014100 0.270976
v -0.018969 0.018384 0.265834
v -0.032806 0.005156 0.261772
v -0.032806 0.018258 0.260353
v -0.019703 0.031361 0.262801
v -0.019703 0.044463 0.260982
v -0.032806 0.031361 0.259739
v -0.032806 0.044463 0.259387
v 0.009856 0.057565 0.302397
v 0.009329 0.057565 0.289295
v 0.012769 0.064823 0.302397
v 0.012506 0.065479 0.289295
v 0.004502 0.056357 0.274939
v 0.001635 0.059919 0.268219
v 0.010562 0.070164 0.275657
v 0.003793 0.070668 0.266692
v -0.000118 0.051184 0.269736
v -0.005332 0.056357 0.265202
v -0.006601 0.070668 0.261739
v 0.012123 0.079534 0.270932
v 0.007254 0.083849 0.265807
v 0.006501 0.096872 0.262763
v -0.006601 0.083770 0.260334
v -0.006601 0.096872 0.259730
v -0.019703 0.057565 0.259977
v -0.019703 0.070668 0.259506
v -0.032806 0.057565 0.259277
v -0.032806 0.070668 0.259277
v -0.019703 0.083770 0.259277
v -0.019703 0.096872 0.259277
v -0.032806 0.083770 0.259277
v -0.032806 0.096872 0.259277
v 0.058911 0.109975 0.259277
v 0.058911 0.123077 0.259277
v 0.045808 0.109975 0.259277
v 0.045808 0.123077 0.259277
v 0.058911 0.136179 0.259277
v 0.058911 0.149282 0.259277
v 0.045808 0.136179 0.259277
v 0.045808 0.149282 0.259277
v 0.032706 0.109975 0.259747
v 0.032706 0.123077 0.259390
v 0.019604 0.109975 0.261323
v 0.019604 0.123077 0.260081
v 0.032706 0.136179 0.259277
v 0.032706 0.149282 0.259277
v 0.019604 0.136179 0.259502
v 0.019604 0.149282 0.259277
v 0.058911 0.162384 0.259277
v 0.058911 0.175486 0.259277
v 0.045808 0.162384 0.259277
v 0.045808 0.175486 0.259277
v 0.058911 0.188589 0.259277
v 0.058911 0.201691 0.259467
v 0.045808 0.188589 0.259277
v 0.045808 0.201691 0.259277
v 0.032706 0.162384 0.259277
v 0.032706 0.175486 0.259277
v 0.019604 0.162384 0.259277
v 0.019604 0.175486 0.259277
v 0.032706 0.188589 0.259277
v 0.032706 0.201691 0.259277
v 0.019604 0.188589 0.259277
v 0.019604 0.201691 0.259277
v 0.006501 0.109975 0.260958
v 0.006501 0.123077 0.259969
v -0.006601 0.109975 0.259382
v -0.006601 0.123077 0.259277
v 0.006501 0.136179 0.259502
v 0.006501 0.149282 0.259277
v -0.006601 0.136179 0.259277
v -0.006601 0.149282 0.259277
v -0.019703 0.109975 0.259277
v -0.019703 0.123077 0.259277
v -0.032806 0.109975 0.259277
v -0.032806 0.123077 0.259277
v -0.019703 0.136179 0.259277
v -0.019703 0.149282 0.259277
v -0.032806 0.136179 0.259277
v -0.032806 0.149282 0.259277
v 0.006501 0.162384 0.259277
v 0.006501 0.175486 0.259277
v -0.006601 0.162384 0.259277
v -0.006601 0.175486 0.259277
v 0.006501 0.188589 0.259277
v 0.006501 0.201691 0.259277
v -0.006601 0.188589 0.259277
v -0.006601 0.201691 0.259277
v -0.019703 0.162384 0.259277
v -0.019703 0.175486 0.259277
v -0.032806 0.162384 0.259277
v -0.032806 0.175486 0.259277
v -0.019703 0.188589 0.259277
v -0.019703 0.201691 0.259277
v -0.032806 0.188589 0.259432
v -0.032806 0.201691 0.259830
v -0.045908 0.005156 0.259510
v -0.045908 0.018258 0.259277
v -0.059010 0.005156 0.259277
v -0.059010 0.018258 0.259277
v -0.045908 0.031361 0.259277
v -0.045908 0.044463 0.259277
v -0.059010 0.031361 0.259277
v -0.059010 0.044463 0.259277
v -0.072113 0.005156 0.259277
v -0.072113 0.018258 0.259277
v -0.085215 0.005156 0.259277
v -0.085215 0.018258 0.259277
v -0.072113 0.031361 0.259277
v -0.072113 0.044463 0.259277
v -0.085215 0.031361 0.259277
v -0.085215 0.044463 0.259277
v -0.045908 0.057565 0.259277
v -0.045908 0.070668 0.259277
v -0.059010 0.057565 0.259277
v -0.059010 0.070668 0.259277
v -0.045908 0.083770 0.259277
v -0.045908 0.096872 0.259277
v -0.059010 0.083770 0.259277
v -0.059010 0.096872 0.259277
v -0.072113 0.057565 0.259277
v -0.072113 0.070668 0.259277
v -0.085215 0.057565 0.259406
v -0.085215 0.070668 0.259779
v -0.072113 0.083770 0.259290
v -0.072113 0.096872 0.259547
v -0.085215 0.083770 0.260461
v -0.085215 0.096872 0.261964
v -0.098317 0.005156 0.259277
v -0.098317 0.018258 0.259277
v -0.111420 0.005156 0.259753
v -0.111420 0.018258 0.260393
v -0.098317 0.031361 0.259522
v -0.098317 0.044463 0.260011
v -0.111420 0.031361 0.261852
v -0.117782 0.050547 0.269904
v -0.112617 0.045493 0.265269
v -0.142479 0.007511 0.302398
v -0.142216 0.006859 0.289295
v -0.138135 0.018258 0.302398
v -0.137607 0.018258 0.289295
v -0.124522 0.005156 0.262860
v -0.130048 0.022274 0.271064
v -0.125217 0.018047 0.265886
v -0.139993 0.004266 0.276711
v -0.133508 0.005156 0.267566
v -0.133920 0.018047 0.275736
v -0.131814 0.013539 0.268804
v -0.130631 0.036819 0.302398
v -0.130368 0.036167 0.289295
v -0.127541 0.044463 0.302398
v -0.127014 0.044463 0.289295
v -0.133280 0.030268 0.302398
v -0.133016 0.029616 0.289295
v -0.128396 0.031712 0.275736
v -0.121660 0.031361 0.266790
v -0.122323 0.045493 0.275040
v -0.119548 0.041812 0.268287
v -0.132193 0.027578 0.279799
v -0.116135 0.072678 0.302398
v -0.115871 0.072026 0.289295
v -0.098317 0.057565 0.261081
v -0.098317 0.070668 0.262972
v -0.116364 0.057565 0.272449
v -0.109812 0.057565 0.266135
v -0.113621 0.069640 0.276971
v -0.107164 0.070668 0.267653
v -0.104287 0.101986 0.302398
v -0.104024 0.101334 0.289295
v -0.111651 0.083770 0.302398
v -0.111124 0.083770 0.289295
v -0.106936 0.095435 0.302398
v -0.106672 0.094782 0.289295
v -0.103750 0.087556 0.271193
v -0.098957 0.083421 0.265965
v -0.102024 0.097086 0.275813
v -0.095316 0.096872 0.266876
v -0.107548 0.083421 0.275813
v -0.105516 0.078821 0.268862
v -0.105895 0.092860 0.279928
v -0.122245 0.057565 0.302398
v -0.121717 0.057565 0.289295
v -0.118784 0.066127 0.302398
v -0.118520 0.065475 0.289295
v -0.119580 0.057565 0.279000
v -0.118161 0.064587 0.281857
v -0.045908 0.109975 0.259277
v -0.045908 0.123077 0.259277
v -0.059010 0.109975 0.259277
v -0.059010 0.123077 0.259419
v -0.045908 0.136179 0.259277
v -0.045908 0.149282 0.259303
v -0.059010 0.136179 0.259805
v -0.059010 0.149282 0.260530
v -0.072113 0.109975 0.260036
v -0.072113 0.123077 0.261150
v -0.091484 0.115829 0.270032
v -0.086356 0.110867 0.265325
v -0.090020 0.123077 0.272870
v -0.083468 0.123077 0.266191
v -0.089791 0.137845 0.302398
v -0.089527 0.137192 0.289295
v -0.085168 0.149282 0.302398
v -0.084640 0.149282 0.289295
v -0.072113 0.136179 0.263084
v -0.077453 0.152838 0.271322
v -0.072696 0.148795 0.266045
v -0.087249 0.135013 0.277231
v -0.080820 0.136179 0.267739
v -0.081176 0.148795 0.275891
v -0.079218 0.144103 0.268920
v -0.045908 0.162384 0.259573
v -0.045908 0.175486 0.260062
v -0.059010 0.162384 0.262076
v -0.065187 0.181111 0.270161
v -0.060096 0.176241 0.265380
v -0.063447 0.203012 0.302397
v -0.063183 0.202359 0.289295
v -0.045908 0.188589 0.261219
v -0.045908 0.201691 0.263214
v -0.063676 0.188589 0.273292
v -0.057124 0.188589 0.266247
v -0.060877 0.200387 0.277491
v -0.054476 0.201691 0.267843
v -0.077943 0.167153 0.302398
v -0.077680 0.166500 0.289295
v -0.074574 0.175486 0.302398
v -0.074047 0.175486 0.289295
v -0.080592 0.160601 0.302398
v -0.080328 0.159949 0.289295
v -0.075652 0.162459 0.275891
v -0.068972 0.162384 0.266962
v -0.069579 0.176241 0.275194
v -0.066953 0.172376 0.268402
v -0.079597 0.158142 0.280057
v -0.069278 0.188589 0.302397
v -0.068750 0.188589 0.289295
v -0.066095 0.196460 0.302397
v -0.065832 0.195808 0.289295
v -0.066892 0.188589 0.279843
v -0.065566 0.195151 0.282723
v -0.101058 0.109975 0.302398
v -0.100530 0.109975 0.289295
v -0.095761 0.123077 0.302398
v -0.095234 0.123077 0.289295
v -0.095951 0.110867 0.275117
v -0.093250 0.107094 0.268344
v -0.093236 0.123077 0.279421
v -0.092439 0.131294 0.302398
v -0.092176 0.130641 0.289295
v -0.091863 0.129869 0.282290
v 0.058911 0.214793 0.259900
v 0.058911 0.227896 0.260778
v 0.045808 0.214793 0.259277
v 0.045808 0.227896 0.259349
v 0.058911 0.240998 0.262504
v 0.064771 0.258932 0.270602
v 0.059806 0.254379 0.266813
v 0.045808 0.240998 0.260042
v 0.045808 0.254100 0.264128
v 0.032706 0.214793 0.259277
v 0.032706 0.227896 0.259277
v 0.019604 0.214793 0.259277
v 0.019604 0.227896 0.259277
v 0.032706 0.240998 0.259971
v 0.032706 0.254100 0.264128
v 0.019604 0.240998 0.259971
v 0.019604 0.254100 0.264128
v 0.058911 0.268965 0.302397
v 0.058911 0.268476 0.289295
v 0.045808 0.268965 0.302397
v 0.045808 0.268476 0.289295
v 0.059806 0.263859 0.275459
v 0.056036 0.261108 0.268958
v 0.045808 0.265003 0.276193
v 0.045808 0.261336 0.268616
v 0.032706 0.268965 0.302397
v 0.032706 0.268476 0.289295
v 0.019604 0.268965 0.302397
v 0.019604 0.268476 0.289295
v 0.032706 0.265003 0.276193
v 0.032706 0.261336 0.268616
v 0.019604 0.265003 0.276193
v 0.019604 0.261336 0.268616
v 0.006501 0.214793 0.259277
v 0.006501 0.227896 0.259277
v -0.006601 0.214793 0.259277
v -0.006601 0.227896 0.259277
v 0.006501 0.240998 0.259971
v 0.006501 0.254100 0.264128
v -0.006601 0.240998 0.259971
v -0.006601 0.254100 0.264128
v -0.019703 0.214793 0.259316
v -0.019703 0.227896 0.259599
v -0.032806 0.214793 0.260599
v -0.032806 0.227896 0.262188
v -0.039268 0.260432 0.283157
v -0.019703 0.240998 0.260435
v -0.019703 0.254100 0.264308
v -0.038889 0.246393 0.270290
v -0.033835 0.241615 0.265435
v -0.037683 0.255279 0.275272
v -0.030780 0.254100 0.267065
v 0.006501 0.268965 0.302397
v 0.006501 0.268476 0.289295
v -0.006601 0.268965 0.302397
v -0.006601 0.268476 0.289295
v 0.006501 0.265003 0.276193
v 0.006501 0.261336 0.268616
v -0.006601 0.265003 0.276193
v -0.006601 0.261336 0.268616
v -0.019703 0.268965 0.302397
v -0.019703 0.268476 0.289295
v -0.032806 0.265784 0.302397
v -0.034063 0.264172 0.288232
v -0.019703 0.265003 0.276193
v -0.019703 0.261336 0.268616
v -0.031064 0.262827 0.276193
v -0.028389 0.261108 0.268958
v -0.051599 0.232320 0.302397
v -0.051335 0.231667 0.289295
v -0.058684 0.214793 0.302397
v -0.058157 0.214793 0.289295
v -0.054247 0.225768 0.302397
v -0.053984 0.225116 0.289295
v -0.051155 0.218119 0.271451
v -0.046436 0.214168 0.266138
v -0.049280 0.227833 0.275968
v -0.042628 0.227896 0.267048
v -0.054804 0.214168 0.275968
v -0.052921 0.209385 0.269001
v -0.053300 0.223424 0.280186
v -0.048091 0.240998 0.302397
v -0.047563 0.240998 0.289295
v -0.042794 0.254100 0.302397
v -0.041738 0.255279 0.288232
v -0.043207 0.241615 0.275272
v -0.040655 0.237658 0.268459
v -0.041034 0.251697 0.279025
v -0.039751 0.261628 0.302397
v -0.039620 0.261302 0.291892
v -0.145128 0.000960 0.302398
v -0.144864 0.000308 0.289295
v -0.160761 0.005156 0.302398
v -0.161288 0.005156 0.289295
v -0.165947 0.018258 0.302398
v -0.166473 0.018258 0.289295
v -0.144459 -0.000695 0.281424
v -0.166005 0.006242 0.275006
v -0.168799 0.002599 0.268281
v -0.168690 0.018258 0.278702
v -0.169460 0.027135 0.302398
v -0.169723 0.026470 0.289295
v -0.170117 0.025473 0.281517
v -0.170528 0.011334 0.269847
v -0.175710 0.006242 0.265258
v -0.171898 0.018258 0.272151
v -0.178449 0.018258 0.266087
v -0.190034 0.005156 0.260000
v -0.190034 0.018258 0.261020
v -0.172052 0.033686 0.302398
v -0.172316 0.033021 0.289295
v -0.176317 0.044463 0.302398
v -0.176844 0.044463 0.289295
v -0.174548 0.030448 0.276767
v -0.181042 0.031361 0.267558
v -0.180580 0.044310 0.275689
v -0.182719 0.039840 0.268789
v -0.190034 0.031361 0.262845
v -0.184448 0.048575 0.270985
v -0.189303 0.044310 0.265846
v -0.181196 0.056791 0.302398
v -0.181459 0.056126 0.289295
v -0.183789 0.063342 0.302398
v -0.184052 0.062678 0.289295
v -0.186688 0.070668 0.302398
v -0.187214 0.070668 0.289295
v -0.182309 0.053979 0.279720
v -0.186011 0.058034 0.275689
v -0.192778 0.057565 0.266709
v -0.192043 0.071895 0.274928
v -0.194911 0.068346 0.268224
v -0.191873 0.083770 0.302398
v -0.192399 0.083770 0.289295
v -0.195525 0.092998 0.302398
v -0.195788 0.092333 0.289295
v -0.194755 0.083770 0.278280
v -0.196229 0.091219 0.281083
v -0.203136 0.005156 0.259277
v -0.203136 0.018258 0.259392
v -0.216238 0.005156 0.259277
v -0.216238 0.018258 0.259277
v -0.203136 0.031361 0.259747
v -0.203136 0.044463 0.260354
v -0.216238 0.031361 0.259277
v -0.216238 0.044463 0.259277
v -0.229341 0.005156 0.259277
v -0.229341 0.018258 0.259277
v -0.242443 0.005156 0.259277
v -0.242443 0.018258 0.259277
v -0.229341 0.031361 0.259277
v -0.229341 0.044463 0.259277
v -0.242443 0.031361 0.259277
v -0.242443 0.044463 0.259277
v -0.203136 0.057565 0.261755
v -0.196639 0.077081 0.269718
v -0.201859 0.071895 0.265202
v -0.216238 0.057565 0.259506
v -0.216238 0.070668 0.259974
v -0.198118 0.099550 0.302398
v -0.198381 0.098885 0.289295
v -0.197963 0.083770 0.271729
v -0.204514 0.083770 0.266031
v -0.200585 0.096101 0.276506
v -0.207107 0.096872 0.267471
v -0.216238 0.083770 0.260951
v -0.216238 0.096872 0.262733
v -0.229341 0.057565 0.259277
v -0.229341 0.070668 0.259277
v -0.242443 0.057565 0.259277
v -0.242443 0.070668 0.259277
v -0.229341 0.083770 0.259380
v -0.229341 0.096872 0.259721
v -0.242443 0.083770 0.259277
v -0.242443 0.096872 0.259277
v -0.202244 0.109975 0.302398
v -0.202770 0.109975 0.289295
v -0.207262 0.122655 0.302398
v -0.207525 0.121990 0.289295
v -0.209854 0.129206 0.302398
v -0.210117 0.128541 0.289295
v -0.206617 0.109962 0.275611
v -0.208831 0.105587 0.268731
v -0.208421 0.119725 0.279591
v -0.210559 0.114322 0.270856
v -0.215451 0.109962 0.265767
v -0.212048 0.123686 0.275611
v -0.218843 0.123077 0.266623
v -0.212614 0.136179 0.302398
v -0.213140 0.136179 0.289295
v -0.217799 0.149282 0.302398
v -0.218326 0.149282 0.289295
v -0.216874 0.136179 0.276193
v -0.221436 0.136179 0.268494
v -0.221191 0.148030 0.276294
v -0.222751 0.142827 0.269588
v -0.229341 0.109975 0.260298
v -0.229341 0.123077 0.261656
v -0.242443 0.109975 0.259277
v -0.242443 0.123077 0.259493
v -0.229341 0.136179 0.263983
v -0.224479 0.151562 0.271994
v -0.229044 0.148030 0.266676
v -0.242443 0.136179 0.259948
v -0.242443 0.149282 0.260882
v -0.221591 0.158862 0.302398
v -0.221854 0.158197 0.289295
v -0.222341 0.156966 0.280729
v -0.224183 0.165413 0.302398
v -0.224446 0.164748 0.289295
v -0.228170 0.175486 0.302398
v -0.228696 0.175486 0.289295
v -0.226623 0.161753 0.276294
v -0.233172 0.162384 0.267384
v -0.232655 0.175615 0.275533
v -0.234943 0.171333 0.268673
v -0.242443 0.162384 0.262620
v -0.236671 0.180068 0.270727
v -0.241600 0.175615 0.265687
v -0.233327 0.188518 0.302398
v -0.233590 0.187853 0.289295
v -0.235920 0.195069 0.302398
v -0.236183 0.194404 0.289295
v -0.238540 0.201691 0.302398
v -0.239066 0.201691 0.289295
v -0.234533 0.185471 0.279461
v -0.238086 0.189339 0.275533
v -0.244908 0.188589 0.266536
v -0.242800 0.201691 0.276193
v -0.247501 0.201691 0.268354
v -0.255545 0.005156 0.259609
v -0.255545 0.018258 0.259322
v -0.268648 0.005156 0.262235
v -0.268648 0.018258 0.260632
v -0.255545 0.031361 0.259277
v -0.255545 0.044463 0.259277
v -0.268648 0.031361 0.259845
v -0.268648 0.044463 0.259439
v -0.287382 0.000887 0.302398
v -0.287119 0.001541 0.289295
v -0.290020 0.007438 0.302398
v -0.289756 0.008093 0.289295
v -0.294376 0.018258 0.302398
v -0.293849 0.018258 0.289295
v -0.285049 0.005282 0.276006
v -0.278408 0.005156 0.267086
v -0.286952 0.015058 0.271515
v -0.282251 0.018958 0.266203
v -0.289096 0.009734 0.280249
v -0.290555 0.018958 0.276006
v -0.288711 0.023793 0.269073
v -0.299209 0.030261 0.302398
v -0.299403 0.032231 0.288142
v -0.301347 0.038051 0.283006
v -0.281750 0.031361 0.263310
v -0.281750 0.044463 0.261262
v -0.295382 0.031361 0.276193
v -0.290234 0.031361 0.267924
v -0.299785 0.043236 0.275250
v -0.292872 0.044463 0.266283
v -0.255545 0.057565 0.259277
v -0.255545 0.070668 0.259277
v -0.268648 0.057565 0.259277
v -0.268648 0.070668 0.259277
v -0.255545 0.083770 0.259277
v -0.255545 0.096872 0.259277
v -0.268648 0.083770 0.259277
v -0.268648 0.096872 0.259277
v -0.281750 0.057565 0.260081
v -0.281750 0.070668 0.259594
v -0.300962 0.052110 0.270254
v -0.295898 0.056913 0.265422
v -0.294852 0.070668 0.262166
v -0.281750 0.083770 0.259314
v -0.281750 0.096872 0.259277
v -0.294852 0.083770 0.260589
v -0.294852 0.096872 0.259829
v -0.301846 0.036812 0.302398
v -0.301699 0.037179 0.291741
v -0.304926 0.044463 0.302398
v -0.303834 0.043236 0.288142
v -0.303106 0.046786 0.278989
v -0.310202 0.057565 0.302398
v -0.309675 0.057565 0.289295
v -0.313673 0.066186 0.302398
v -0.313409 0.066840 0.289295
v -0.316310 0.072737 0.302398
v -0.316047 0.073392 0.289295
v -0.305291 0.056913 0.275250
v -0.302721 0.060845 0.268447
v -0.311356 0.070709 0.275959
v -0.304698 0.070668 0.267032
v -0.315357 0.075104 0.280170
v -0.320752 0.083770 0.302398
v -0.320225 0.083770 0.289295
v -0.325499 0.095560 0.302398
v -0.325235 0.096214 0.289295
v -0.313214 0.080428 0.271435
v -0.308490 0.084385 0.266128
v -0.307955 0.096872 0.263208
v -0.316863 0.084385 0.275959
v -0.314972 0.089163 0.268994
v -0.322927 0.098181 0.277501
v -0.316524 0.096872 0.267838
v -0.328137 0.102111 0.302398
v -0.327873 0.102766 0.289295
v -0.327609 0.103421 0.282740
v -0.255545 0.109975 0.259277
v -0.255545 0.123077 0.259277
v -0.268648 0.109975 0.259277
v -0.268648 0.123077 0.259277
v -0.255545 0.136179 0.259277
v -0.255545 0.149282 0.259367
v -0.268648 0.136179 0.259277
v -0.268648 0.149282 0.259277
v -0.281750 0.109975 0.259277
v -0.281750 0.123077 0.259277
v -0.294852 0.109975 0.259431
v -0.294852 0.123077 0.259277
v -0.281750 0.136179 0.259277
v -0.281750 0.149282 0.259277
v -0.294852 0.136179 0.259277
v -0.294852 0.149282 0.259277
v -0.255545 0.162384 0.259696
v -0.255545 0.175486 0.260242
v -0.268648 0.162384 0.259277
v -0.268648 0.175486 0.259277
v -0.255545 0.188589 0.261556
v -0.255545 0.201691 0.263817
v -0.268648 0.188589 0.259480
v -0.268648 0.201691 0.259923
v -0.281750 0.162384 0.259277
v -0.281750 0.175486 0.259277
v -0.294852 0.162384 0.259277
v -0.294852 0.175486 0.259277
v -0.281750 0.188589 0.259277
v -0.281750 0.201691 0.259277
v -0.294852 0.188589 0.259277
v -0.294852 0.201691 0.259277
v -0.307955 0.109975 0.261220
v -0.307955 0.123077 0.260065
v -0.325713 0.109975 0.273314
v -0.319162 0.109975 0.266248
v -0.327224 0.117480 0.270175
v -0.322137 0.122339 0.265388
v -0.307955 0.136179 0.259578
v -0.307955 0.149282 0.259306
v -0.321057 0.136179 0.262097
v -0.321057 0.149282 0.260547
v -0.331302 0.109975 0.302398
v -0.330775 0.109975 0.289295
v -0.336578 0.123077 0.302398
v -0.336051 0.123077 0.289295
v -0.328928 0.109975 0.279866
v -0.331599 0.122339 0.275203
v -0.328982 0.126215 0.268412
v -0.339963 0.131485 0.302398
v -0.339699 0.132139 0.289295
v -0.342601 0.138036 0.302398
v -0.342337 0.138691 0.289295
v -0.347128 0.149282 0.302398
v -0.346601 0.149282 0.289295
v -0.337664 0.136135 0.275911
v -0.330988 0.136179 0.266979
v -0.339476 0.145798 0.271356
v -0.334729 0.149812 0.266067
v -0.341619 0.140474 0.280091
v -0.343170 0.149812 0.275911
v -0.341234 0.154533 0.268939
v -0.307955 0.162384 0.259278
v -0.307955 0.175486 0.259278
v -0.321057 0.162384 0.259813
v -0.321057 0.175486 0.259424
v -0.307955 0.188589 0.259278
v -0.307955 0.201691 0.259277
v -0.321057 0.188589 0.259278
v -0.321057 0.201691 0.259278
v -0.351789 0.160859 0.302398
v -0.351526 0.161514 0.289295
v -0.334159 0.162384 0.263124
v -0.334159 0.175486 0.261178
v -0.349235 0.163608 0.277341
v -0.342815 0.162384 0.267770
v -0.352003 0.175486 0.273055
v -0.345452 0.175486 0.266214
v -0.334159 0.188589 0.260049
v -0.334159 0.201691 0.259562
v -0.353486 0.182850 0.270096
v -0.348376 0.187766 0.265354
v -0.347262 0.201691 0.262028
v -0.243726 0.214793 0.302398
v -0.244252 0.214793 0.289295
v -0.247656 0.224725 0.302398
v -0.247919 0.224060 0.289295
v -0.247229 0.213682 0.276216
v -0.248863 0.208574 0.269459
v -0.248453 0.222712 0.280600
v -0.250249 0.231276 0.302398
v -0.250512 0.230612 0.289295
v -0.250591 0.217309 0.271865
v -0.255193 0.213682 0.266554
v -0.252660 0.227406 0.276216
v -0.259237 0.227896 0.267298
v -0.268648 0.214793 0.260813
v -0.268648 0.227896 0.262508
v -0.254096 0.240998 0.302398
v -0.254622 0.240998 0.289295
v -0.259281 0.254100 0.302398
v -0.260099 0.254991 0.288760
v -0.262373 0.259953 0.284036
v -0.258692 0.241268 0.275456
v -0.261054 0.237080 0.268616
v -0.260645 0.251218 0.279332
v -0.262783 0.245815 0.270597
v -0.267749 0.241268 0.265607
v -0.264123 0.254991 0.275456
v -0.270973 0.254100 0.267130
v -0.281750 0.214793 0.259354
v -0.281750 0.227896 0.259670
v -0.294852 0.214793 0.259277
v -0.294852 0.227896 0.259277
v -0.281750 0.240998 0.260533
v -0.281750 0.254100 0.264374
v -0.294852 0.240998 0.259971
v -0.294852 0.254100 0.264128
v -0.261985 0.260933 0.302398
v -0.262022 0.260839 0.292771
v -0.268648 0.265089 0.302398
v -0.267503 0.263894 0.288760
v -0.270666 0.262827 0.276193
v -0.273246 0.261108 0.268958
v -0.281750 0.268965 0.302398
v -0.281750 0.268476 0.289295
v -0.294852 0.268965 0.302398
v -0.294852 0.268476 0.289295
v -0.281750 0.265003 0.276193
v -0.281750 0.261336 0.268616
v -0.294852 0.265003 0.276193
v -0.294852 0.261336 0.268616
v -0.307955 0.214793 0.259277
v -0.307955 0.227896 0.259277
v -0.321057 0.214793 0.259278
v -0.321057 0.227896 0.259278
v -0.307955 0.240998 0.259971
v -0.307955 0.254100 0.264128
v -0.321057 0.240998 0.259971
v -0.321057 0.254100 0.264128
v -0.334159 0.214793 0.259298
v -0.334159 0.227896 0.259278
v -0.347262 0.214793 0.260504
v -0.347262 0.227896 0.259798
v -0.334159 0.240998 0.259971
v -0.334159 0.254100 0.264128
v -0.347262 0.240998 0.260109
v -0.347262 0.254100 0.264128
v -0.307955 0.268965 0.302398
v -0.307955 0.268476 0.289295
v -0.321057 0.268965 0.302398
v -0.321057 0.268476 0.289295
v -0.307955 0.265003 0.276193
v -0.307955 0.261336 0.268616
v -0.321057 0.265003 0.276193
v -0.321057 0.261336 0.268616
v -0.334159 0.268965 0.302398
v -0.334159 0.268476 0.289295
v -0.347262 0.268965 0.302398
v -0.347262 0.268476 0.289295
v -0.334159 0.265003 0.276193
v -0.334159 0.261336 0.268616
v -0.347262 0.265003 0.276193
v -0.347262 0.261336 0.268616
v -0.354427 0.167410 0.302398
v -0.354163 0.168065 0.289295
v -0.357678 0.175486 0.302398
v -0.357151 0.175486 0.289295
v -0.353871 0.168791 0.282474
v -0.355219 0.175486 0.279606
v -0.362953 0.188589 0.302398
v -0.362426 0.188589 0.289295
v -0.366253 0.196784 0.302398
v -0.365990 0.197439 0.289295
v -0.368891 0.203335 0.302398
v -0.368627 0.203990 0.289295
v -0.357906 0.187766 0.275155
v -0.355244 0.191585 0.268376
v -0.363971 0.201562 0.275864
v -0.357278 0.201691 0.266926
v -0.367881 0.205844 0.280012
v -0.373504 0.214793 0.302398
v -0.372977 0.214793 0.289295
v -0.378079 0.226158 0.302398
v -0.377816 0.226813 0.289295
v -0.365737 0.211168 0.271277
v -0.360968 0.215238 0.266018
v -0.360364 0.227896 0.263055
v -0.369477 0.215238 0.275864
v -0.367496 0.219903 0.268904
v -0.375542 0.229034 0.277181
v -0.369105 0.227896 0.267717
v -0.360364 0.240998 0.261482
v -0.360364 0.254100 0.264281
v -0.378294 0.240998 0.272796
v -0.371742 0.240998 0.266179
v -0.379747 0.248220 0.270017
v -0.374615 0.253193 0.267148
v -0.380717 0.232709 0.302398
v -0.380454 0.233364 0.289295
v -0.380133 0.234161 0.282207
v -0.384054 0.240998 0.302398
v -0.383527 0.240998 0.289295
v -0.389329 0.254100 0.302398
v -0.388802 0.254100 0.289295
v -0.381509 0.240998 0.279347
v -0.384214 0.253193 0.275108
v -0.381506 0.256955 0.268958
v -0.360364 0.268965 0.302398
v -0.360364 0.268476 0.289295
v -0.373467 0.268965 0.302398
v -0.373467 0.268476 0.289295
v -0.360364 0.265003 0.276193
v -0.360364 0.261336 0.268616
v -0.373467 0.265003 0.276193
v -0.373467 0.261336 0.268616
v -0.388368 0.266194 0.302398
v -0.388193 0.265868 0.289295
v -0.385710 0.263859 0.277503
v -0.381506 0.261108 0.268958
vn 0.9300 -0.3482 0.1179
vn 0.9279 -0.3723 0.0186
vn 0.9201 -0.3638 0.1453
vn 0.5876 -0.2331 0.7748
vn 0.8291 -0.3525 0.4340
vn 0.7480 -0.3222 0.5802
vn 0.5140 -0.2135 0.8308
vn 0.6808 -0.2654 0.6827
vn 0.8542 -0.3304 0.4016
vn 0.8861 -0.3662 0.2841
vn 0.9160 -0.3795 0.1302
vn 0.9233 -0.3602 0.1334
vn 0.9108 -0.3873 0.1429
vn 0.6490 -0.2484 0.7191
vn 0.8449 -0.3194 0.4291
vn 0.8890 -0.3302 0.3173
vn 0.9179 -0.3826 0.1054
vn 0.9299 -0.3482 0.1184
vn 0.6481 -0.2478 0.7201
vn 0.8447 -0.3187 0.4300
vn 0.8288 -0.3523 0.4348
vn 0.5864 -0.2328 0.7758
vn 0.9200 -0.3638 0.1456
vn 0.9108 -0.3871 0.1434
vn 0.9159 -0.3795 0.1307
vn 0.6308 -0.2411 0.7376
vn 0.8426 -0.3527 0.4069
vn 0.7655 -0.3097 0.5641
vn 0.5367 -0.2089 0.8175
vn 0.2653 -0.0984 0.9591
vn 0.3459 -0.1390 0.9279
vn 0.4604 -0.1846 0.8683
vn 0.3051 -0.1274 0.9437
vn 0.1082 -0.0542 0.9927
vn 0.1865 -0.0750 0.9796
vn 0.8908 -0.3756 0.2557
vn 0.8889 -0.3296 0.3183
vn 0.9107 -0.3924 0.1289
vn 0.7149 -0.2834 0.6392
vn 0.8859 -0.3661 0.2848
vn 0.9180 -0.3825 0.1050
vn 0.8910 -0.3758 0.2547
vn 0.9301 -0.3482 0.1170
vn 0.9202 -0.3638 0.1446
vn 0.9181 -0.3824 0.1041
vn 0.8893 -0.3314 0.3152
vn 0.8452 -0.3208 0.4274
vn 0.8915 -0.3761 0.2525
vn 0.7737 -0.6157 0.1495
vn 0.3457 -0.9216 0.1763
vn 0.3473 -0.9373 0.0275
vn 0.7867 -0.6169 0.0237
vn 0.0976 -0.6590 0.7458
vn -0.0836 -0.6583 0.7481
vn -0.0614 -0.9086 0.4131
vn 0.0858 -0.9112 0.4029
vn 0.0664 -0.9839 0.1661
vn -0.0293 -0.9849 0.1705
vn -0.0025 -0.9998 0.0212
vn 0.0433 -0.9988 0.0225
vn 0.3052 -0.6118 0.7298
vn 0.4266 -0.7780 0.4613
vn 0.7537 -0.5703 0.3268
vn 0.6730 -0.2736 0.6872
vn 0.8306 -0.3665 0.4191
vn 0.8456 -0.3516 0.4016
vn 0.6328 -0.2463 0.7341
vn 0.4323 -0.3335 0.8378
vn 0.6507 -0.4557 0.6074
vn 0.3278 -0.1703 0.9293
vn 0.9238 -0.3593 0.1324
vn 0.9109 -0.3922 0.1283
vn 0.5439 -0.2120 0.8119
vn 0.7712 -0.3134 0.5542
vn 0.7185 -0.2897 0.6323
vn 0.4656 -0.1876 0.8648
vn 0.1893 -0.0758 0.9790
vn 0.2671 -0.1016 0.9583
vn 0.1146 -0.3076 0.9446
vn 0.1089 -0.1350 0.9848
vn -0.0917 -0.1347 0.9866
vn -0.1007 -0.3124 0.9446
vn 0.0692 -0.0448 0.9966
vn 0.0328 -0.0179 0.9993
vn -0.0267 -0.0152 0.9995
vn -0.0563 -0.0405 0.9976
vn 0.6509 -0.2495 0.7170
vn -0.2935 -0.9380 0.1846
vn -0.7583 -0.6325 0.1576
vn -0.7749 -0.6317 0.0211
vn -0.2952 -0.9551 0.0242
vn -0.3817 -0.7883 0.4826
vn -0.7342 -0.5855 0.3436
vn -0.6050 -0.2451 0.7576
vn -0.8353 -0.3586 0.4168
vn -0.8221 -0.3704 0.4324
vn -0.6525 -0.2712 0.7076
vn -0.3999 -0.3388 0.8517
vn -0.6172 -0.4675 0.6328
vn -0.3088 -0.1675 0.9363
vn -0.9092 -0.3944 0.1331
vn -0.9267 -0.3753 0.0186
vn -0.9255 -0.3784 0.0181
vn -0.9199 -0.3676 0.1368
vn -0.2489 -0.0997 0.9634
vn -0.1651 -0.0714 0.9837
vn -0.3736 -0.1535 0.9148
vn -0.5415 -0.2234 0.8105
vn -0.6585 -0.2460 0.7112
vn -0.8503 -0.3401 0.4017
vn -0.8601 -0.3309 0.3883
vn -0.7009 -0.2714 0.6596
vn -0.9116 -0.3856 0.1426
vn -0.9248 -0.3801 0.0152
vn -0.9265 -0.3758 0.0181
vn -0.9256 -0.3563 0.1278
vn -0.9259 -0.3755 0.0404
vn -0.9266 -0.3757 0.0124
vn -0.9168 -0.3817 0.1171
vn -0.7622 -0.3268 0.5587
vn -0.8904 -0.3693 0.2660
vn -0.2637 -0.6152 0.7430
vn 0.9180 -0.3825 0.1046
vn 0.9300 -0.3482 0.1174
vn 0.5898 -0.2337 0.7730
vn 0.8298 -0.3528 0.4324
vn 0.7496 -0.3230 0.5778
vn 0.5165 -0.2147 0.8289
vn 0.6833 -0.2660 0.6800
vn 0.8550 -0.3302 0.3999
vn 0.8866 -0.3663 0.2825
vn 0.9161 -0.3795 0.1290
vn 0.9236 -0.3596 0.1327
vn 0.9108 -0.3876 0.1421
vn 0.6347 -0.2413 0.7341
vn 0.8446 -0.3520 0.4034
vn 0.7693 -0.3121 0.5574
vn 0.5415 -0.2110 0.8138
vn 0.2673 -0.0996 0.9584
vn 0.3482 -0.1399 0.9269
vn 0.8913 -0.3760 0.2536
vn 0.8892 -0.3308 0.3162
vn 0.9108 -0.3923 0.1285
vn 0.6500 -0.2490 0.7180
vn 0.8451 -0.3201 0.4283
vn 0.8295 -0.3527 0.4332
vn 0.5887 -0.2334 0.7739
vn 0.9201 -0.3638 0.1450
vn 0.9108 -0.3874 0.1425
vn 0.9161 -0.3795 0.1296
vn 0.6820 -0.2657 0.6814
vn 0.8546 -0.3303 0.4007
vn 0.8436 -0.3523 0.4051
vn 0.6327 -0.2412 0.7358
vn 0.5153 -0.2140 0.8299
vn 0.7488 -0.3226 0.5790
vn 0.3471 -0.1394 0.9274
vn 0.9234 -0.3599 0.1331
vn 0.9108 -0.3924 0.1287
vn 0.4639 -0.1867 0.8660
vn 0.3076 -0.1281 0.9429
vn 0.1099 -0.0546 0.9924
vn 0.1883 -0.0756 0.9792
vn 0.2248 -0.0875 0.9705
vn 0.1427 -0.0618 0.9878
vn 0.0211 -0.0096 0.9997
vn 0.0503 -0.0245 0.9984
vn 0.7173 -0.2876 0.6346
vn 0.8864 -0.3662 0.2833
vn 0.3088 -0.1283 0.9424
vn 0.2259 -0.0881 0.9702
vn 0.0510 -0.0248 0.9984
vn 0.1108 -0.0547 0.9923
vn 0.1436 -0.0622 0.9877
vn 0.0749 -0.0368 0.9965
vn 0.0070 -0.0047 1.0000
vn 0.0214 -0.0098 0.9997
vn 0.0119 -0.0070 0.9999
vn 0.0025 -0.0024 1.0000
vn -0.0018 -0.0018 1.0000
vn -0.0095 -0.0059 0.9999
vn 0.0000 -0.0000 1.0000
vn 0.0332 -0.0170 0.9993
vn 0.0116 -0.0070 0.9999
vn 0.0012 -0.0012 1.0000
vn 0.0023 -0.0023 1.0000
vn 0.5391 -0.2100 0.8156
vn 0.7674 -0.3109 0.5607
vn 0.7161 -0.2855 0.6369
vn 0.4622 -0.1856 0.8671
vn 0.1874 -0.0753 0.9794
vn 0.2663 -0.0990 0.9588
vn 0.3064 -0.1278 0.9433
vn 0.2236 -0.0870 0.9708
vn 0.0497 -0.0242 0.9985
vn 0.1090 -0.0544 0.9926
vn 0.0742 -0.0365 0.9966
vn 0.0328 -0.0168 0.9993
vn 0.0011 -0.0011 1.0000
vn 0.0069 -0.0046 1.0000
vn 0.0115 -0.0069 0.9999
vn 0.1417 -0.0615 0.9880
vn 0.0735 -0.0361 0.9966
vn 0.0068 -0.0045 1.0000
vn 0.0207 -0.0094 0.9997
vn 0.0325 -0.0166 0.9993
vn 0.0113 -0.0068 0.9999
vn -0.0019 0.0019 1.0000
vn -0.0007 0.0007 1.0000
vn -0.0285 0.0141 0.9995
vn -0.0098 0.0061 0.9999
vn -0.0052 0.0037 1.0000
vn -0.0654 0.0319 0.9974
vn -0.0019 0.0056 1.0000
vn -0.0098 0.0182 0.9998
vn 0.0098 0.0182 0.9998
vn 0.0019 0.0056 1.0000
vn -0.0286 0.0395 0.9988
vn -0.0638 0.0792 0.9948
vn 0.0570 0.0826 0.9949
vn 0.0270 0.0412 0.9988
vn -0.0170 0.0081 0.9998
vn -0.0423 0.0211 0.9989
vn -0.2096 0.0813 0.9744
vn -0.1300 0.0577 0.9898
vn -0.0922 0.0453 0.9947
vn -0.1680 0.0714 0.9832
vn -0.3777 0.1532 0.9132
vn -0.2913 0.1159 0.9496
vn -0.2712 0.5437 0.7943
vn 0.2413 0.5554 0.7958
vn 0.2636 0.3088 0.9139
vn -0.2840 0.2863 0.9151
vn -0.1246 0.1404 0.9822
vn 0.1086 0.1477 0.9830
vn -0.6615 0.2445 0.7090
vn -0.8530 0.3363 0.3992
vn -0.5332 0.5364 0.6541
vn -0.5788 0.2285 0.7828
vn 0.5701 0.2536 0.7814
vn 0.4687 0.5737 0.6717
vn 0.8244 0.3504 0.4444
vn 0.6509 0.2619 0.7125
vn -0.7062 0.7077 0.0216
vn 0.3658 0.9303 0.0286
vn 0.5140 0.7822 0.3520
vn -0.7651 0.5737 0.2924
vn -0.5510 0.6870 0.4737
vn 0.1858 0.7011 0.6884
vn -0.0894 -0.0446 0.9950
vn -0.0402 -0.0205 0.9990
vn -0.2050 -0.0806 0.9754
vn -0.2870 -0.1151 0.9510
vn -0.0157 -0.0077 0.9998
vn -0.0046 -0.0034 1.0000
vn -0.0617 -0.0304 0.9976
vn -0.1254 -0.0569 0.9905
vn -0.4936 -0.2058 0.8450
vn -0.7345 -0.3190 0.5989
vn -0.8195 -0.3391 0.4620
vn -0.5745 -0.2295 0.7857
vn -0.6644 -0.2600 0.7007
vn -0.8474 -0.3302 0.4157
vn -0.8918 -0.3331 0.3062
vn -0.9205 -0.3653 0.1388
vn -0.9269 -0.3749 0.0181
vn -0.9286 -0.3709 0.0151
vn -0.9261 -0.3549 0.1282
vn -0.5352 -0.2225 0.8149
vn -0.7593 -0.3273 0.5624
vn -0.8338 -0.3579 0.4203
vn -0.6055 -0.2385 0.7592
vn -0.3274 -0.1323 0.9356
vn -0.2440 -0.0964 0.9650
vn -0.9093 -0.3935 0.1352
vn -0.8938 -0.3804 0.2377
vn -0.0006 -0.0006 1.0000
vn -0.0089 -0.0056 0.9999
vn -0.0265 -0.0130 0.9996
vn -0.0016 -0.0016 1.0000
vn -0.1594 -0.0693 0.9848
vn -0.0854 -0.0427 0.9954
vn -0.2816 -0.1112 0.9531
vn -0.3666 -0.1502 0.9182
vn -0.0381 -0.0195 0.9991
vn -0.0145 -0.0074 0.9999
vn -0.1213 -0.0560 0.9910
vn -0.2004 -0.0791 0.9765
vn -0.9249 -0.3576 0.1295
vn -0.9267 -0.3754 0.0186
vn -0.9163 -0.3820 0.1199
vn -0.8587 -0.3316 0.3907
vn -0.8892 -0.3694 0.2700
vn -0.5698 -0.2270 0.7898
vn -0.8180 -0.3367 0.4664
vn -0.8482 -0.3407 0.4055
vn -0.6550 -0.2432 0.7154
vn -0.9257 -0.3545 0.1317
vn -0.9280 -0.3723 0.0169
vn -0.9266 -0.3758 0.0153
vn -0.9257 -0.3756 0.0446
vn -0.9114 -0.3850 0.1451
vn -0.9254 -0.3787 0.0171
vn -0.8925 -0.3794 0.2439
vn -0.6009 -0.2379 0.7631
vn -0.8324 -0.3573 0.4237
vn -0.8461 -0.3289 0.4195
vn -0.6607 -0.2577 0.7051
vn -0.4879 -0.2037 0.8488
vn -0.7305 -0.3176 0.6046
vn -0.3220 -0.1314 0.9376
vn -0.9094 -0.3926 0.1373
vn -0.9199 -0.3662 0.1406
vn -0.9159 -0.3822 0.1227
vn -0.8914 -0.3308 0.3099
vn -0.8880 -0.3694 0.2738
vn -0.6971 -0.2710 0.6638
vn 0.0019 0.0019 1.0000
vn 0.0098 0.0061 0.9999
vn 0.0293 0.0166 0.9994
vn 0.0687 0.0370 0.9970
vn 0.0086 0.0054 0.9999
vn 0.0016 0.0016 1.0000
vn -0.0040 -0.0032 1.0000
vn -0.0004 -0.0004 1.0000
vn -0.0250 -0.0121 0.9996
vn -0.0587 -0.0289 0.9979
vn -0.0015 -0.0015 1.0000
vn -0.0084 -0.0053 1.0000
vn 0.1376 0.0676 0.9882
vn 0.2260 0.1001 0.9690
vn 0.0593 0.0290 0.9978
vn 0.0254 0.0123 0.9996
vn 0.3191 0.1342 0.9382
vn 0.4885 0.2027 0.8487
vn 0.2007 0.0786 0.9765
vn 0.1219 0.0559 0.9910
vn 0.0004 0.0004 1.0000
vn 0.0041 0.0032 1.0000
vn 0.0146 0.0074 0.9999
vn 0.0381 0.0194 0.9991
vn -0.2379 -0.0945 0.9667
vn -0.1538 -0.0671 0.9858
vn -0.3599 -0.1466 0.9214
vn -0.5289 -0.2217 0.8192
vn -0.0818 -0.0406 0.9958
vn -0.0365 -0.0188 0.9992
vn -0.1963 -0.0782 0.9774
vn -0.2768 -0.1070 0.9550
vn -0.6515 -0.2400 0.7197
vn -0.8460 -0.3413 0.4097
vn -0.8574 -0.3323 0.3931
vn -0.6935 -0.2706 0.6677
vn -0.9112 -0.3846 0.1475
vn -0.9259 -0.3774 0.0188
vn -0.9268 -0.3750 0.0190
vn -0.9242 -0.3587 0.1311
vn -0.9255 -0.3755 0.0485
vn -0.9265 -0.3758 0.0179
vn -0.4817 -0.2020 0.8527
vn -0.7259 -0.3164 0.6107
vn -0.8163 -0.3341 0.4712
vn -0.5649 -0.2242 0.7941
vn -0.6567 -0.2555 0.7096
vn -0.8447 -0.3276 0.4233
vn -0.8910 -0.3282 0.3137
vn -0.9193 -0.3670 0.1422
vn -0.9266 -0.3756 0.0190
vn -0.9274 -0.3736 0.0186
vn -0.9254 -0.3540 0.1352
vn -0.7564 -0.3278 0.5661
vn -0.8909 -0.3787 0.2506
vn -0.0135 -0.0073 0.9999
vn -0.0034 -0.0029 1.0000
vn -0.0556 -0.0274 0.9981
vn -0.1172 -0.0556 0.9915
vn -0.0003 -0.0003 1.0000
vn -0.0078 -0.0051 1.0000
vn -0.0235 -0.0112 0.9997
vn -0.5231 -0.2200 0.8234
vn -0.7533 -0.3274 0.5704
vn -0.8309 -0.3566 0.4271
vn -0.5962 -0.2372 0.7670
vn -0.3166 -0.1306 0.9395
vn -0.2325 -0.0924 0.9682
vn -0.1489 -0.0651 0.9867
vn -0.0785 -0.0388 0.9962
vn -0.2721 -0.1035 0.9567
vn -0.3540 -0.1436 0.9242
vn -0.9095 -0.3917 0.1392
vn 0.7313 0.3160 0.6045
vn 0.4700 -0.5710 0.6731
vn 0.1441 -0.6521 0.7443
vn 0.1733 -0.9124 0.3709
vn 0.5966 -0.7176 0.3593
vn 0.6229 -0.7711 0.1319
vn 0.2154 -0.9672 0.1345
vn 0.2280 -0.9735 0.0171
vn 0.6155 -0.7880 0.0171
vn 0.9161 -0.3797 0.1286
vn 0.9279 -0.3725 0.0186
vn 0.9237 -0.3596 0.1325
vn 0.6361 -0.2416 0.7328
vn 0.8453 -0.3519 0.4022
vn 0.7705 -0.3132 0.5551
vn 0.5432 -0.2118 0.8124
vn 0.8913 -0.3763 0.2529
vn 0.8892 -0.3314 0.3156
vn 0.9180 -0.3826 0.1043
vn 0.9300 -0.3484 0.1171
vn 0.9108 -0.3925 0.1284
vn 0.5384 -0.3099 0.7836
vn 0.8066 -0.4193 0.4166
vn 0.7501 -0.3234 0.5769
vn 0.5070 -0.2240 0.8323
vn 0.1961 -0.1360 0.9711
vn 0.1789 -0.2858 0.9414
vn 0.3479 -0.1417 0.9267
vn 0.2681 -0.1002 0.9582
vn 0.0755 -0.0371 0.9965
vn 0.1420 -0.0675 0.9876
vn 0.6841 -0.2663 0.6790
vn 0.8552 -0.3303 0.3993
vn 0.8867 -0.3665 0.2819
vn 0.8481 -0.5120 0.1366
vn 0.8546 -0.5190 0.0189
vn -0.9235 -0.3608 0.1306
vn -0.9155 -0.3824 0.1253
vn -0.5520 -0.2173 0.8050
vn -0.7769 -0.3202 0.5422
vn -0.8483 -0.3528 0.3948
vn -0.6437 -0.2440 0.7254
vn -0.8887 -0.3363 0.3117
vn -0.8912 -0.3796 0.2484
vn -0.9292 -0.3512 0.1153
vn -0.9172 -0.3851 0.1025
vn -0.9098 -0.3950 0.1275
vn -0.8563 -0.3325 0.3951
vn -0.6891 -0.2698 0.6726
vn -0.8869 -0.3693 0.2775
vn 0.6796 -0.2653 0.6840
vn 0.8537 -0.3306 0.4024
vn 0.8416 -0.3533 0.4086
vn 0.6288 -0.2411 0.7392
vn 0.9231 -0.3607 0.1337
vn 0.9106 -0.3927 0.1290
vn 0.9178 -0.3828 0.1057
vn 0.5343 -0.2080 0.8193
vn 0.7635 -0.3086 0.5674
vn 0.7136 -0.2815 0.6415
vn 0.4586 -0.1836 0.8695
vn 0.6470 -0.2473 0.7213
vn 0.8445 -0.3182 0.4309
vn 0.8886 -0.3292 0.3193
vn 0.9298 -0.3484 0.1188
vn 0.9199 -0.3640 0.1459
vn 0.8905 -0.3756 0.2567
vn 0.9158 -0.3797 0.1306
vn 0.8858 -0.3664 0.2847
vn 0.6826 -0.2660 0.6806
vn 0.8547 -0.3304 0.4003
vn 0.8441 -0.3523 0.4043
vn 0.6337 -0.2414 0.7350
vn 0.9235 -0.3599 0.1329
vn 0.9107 -0.3926 0.1286
vn 0.9179 -0.3827 0.1048
vn 0.9160 -0.3797 0.1293
vn 0.8910 -0.3761 0.2542
vn 0.8864 -0.3665 0.2829
vn 0.9159 -0.3797 0.1299
vn 0.9233 -0.3603 0.1333
vn 0.5403 -0.2106 0.8147
vn 0.7682 -0.3117 0.5592
vn 0.7166 -0.2867 0.6359
vn 0.4630 -0.1862 0.8666
vn 0.6494 -0.2488 0.7186
vn 0.8449 -0.3199 0.4288
vn 0.8890 -0.3307 0.3168
vn 0.9299 -0.3484 0.1177
vn 0.9200 -0.3640 0.1451
vn 0.5880 -0.2334 0.7745
vn 0.8291 -0.3527 0.4337
vn 0.7482 -0.3225 0.5798
vn 0.5145 -0.2138 0.8304
vn 0.2241 -0.0872 0.9707
vn 0.3069 -0.1280 0.9431
vn 0.6811 -0.2656 0.6823
vn 0.8542 -0.3305 0.4014
vn 0.8861 -0.3664 0.2838
vn 0.9107 -0.3875 0.1428
vn 0.6505 -0.2495 0.7173
vn 0.8451 -0.3207 0.4278
vn 0.8295 -0.3530 0.4327
vn 0.5894 -0.2337 0.7733
vn 0.4651 -0.1875 0.8652
vn 0.7181 -0.2892 0.6330
vn 0.3084 -0.1283 0.9426
vn 0.9201 -0.3640 0.1448
vn 0.9107 -0.3878 0.1423
vn 0.5160 -0.2145 0.8293
vn 0.3477 -0.1398 0.9271
vn 0.1432 -0.0621 0.9877
vn 0.2254 -0.0879 0.9703
vn 0.1890 -0.0758 0.9790
vn 0.1105 -0.0547 0.9924
vn 0.0118 -0.0070 0.9999
vn 0.0334 -0.0171 0.9993
vn 0.0508 -0.0247 0.9984
vn 0.0213 -0.0097 0.9997
vn 0.0024 -0.0024 1.0000
vn 0.7492 -0.3230 0.5783
vn 0.2668 -0.0994 0.9586
vn 0.1879 -0.0755 0.9793
vn 0.0330 -0.0169 0.9993
vn 0.0746 -0.0367 0.9965
vn 0.1094 -0.0545 0.9925
vn 0.0499 -0.0243 0.9985
vn 0.0070 -0.0046 1.0000
vn 0.6313 -0.2413 0.7371
vn 0.8428 -0.3528 0.4064
vn 0.7659 -0.3101 0.5633
vn 0.5373 -0.2093 0.8170
vn 0.8908 -0.3759 0.2555
vn 0.8888 -0.3299 0.3181
vn 0.9178 -0.3828 0.1052
vn 0.9299 -0.3484 0.1183
vn 0.9106 -0.3926 0.1288
vn 0.6482 -0.2481 0.7199
vn 0.8447 -0.3191 0.4298
vn 0.8287 -0.3525 0.4347
vn 0.5866 -0.2330 0.7756
vn 0.4608 -0.1849 0.8680
vn 0.7151 -0.2841 0.6387
vn 0.3054 -0.1276 0.9437
vn 0.9200 -0.3640 0.1455
vn 0.9107 -0.3873 0.1433
vn 0.3463 -0.1392 0.9277
vn 0.2656 -0.0986 0.9590
vn 0.0737 -0.0362 0.9966
vn 0.1420 -0.0616 0.9879
vn 0.1867 -0.0751 0.9795
vn 0.1083 -0.0543 0.9926
vn 0.0114 -0.0068 0.9999
vn 0.0326 -0.0166 0.9993
vn 0.5129 -0.2131 0.8316
vn 0.3449 -0.1386 0.9284
vn 0.1408 -0.0612 0.9881
vn 0.2226 -0.0867 0.9710
vn 0.2644 -0.0978 0.9594
vn 0.1856 -0.0747 0.9798
vn 0.0321 -0.0164 0.9993
vn 0.0729 -0.0358 0.9967
vn 0.0492 -0.0240 0.9985
vn 0.0205 -0.0093 0.9997
vn 0.0066 -0.0045 1.0000
vn 0.0209 -0.0095 0.9997
vn 0.0068 -0.0046 1.0000
vn -0.0010 0.0010 1.0000
vn -0.0038 0.0055 1.0000
vn -0.0001 0.0001 1.0000
vn -0.0063 0.0043 1.0000
vn -0.0197 0.0091 0.9998
vn -0.0524 0.0407 0.9978
vn -0.0186 0.0199 0.9996
vn -0.0112 0.0067 0.9999
vn -0.0022 0.0022 1.0000
vn -0.0011 0.0011 1.0000
vn -0.0067 0.0045 1.0000
vn -0.0732 0.0361 0.9967
vn -0.0322 0.0165 0.9993
vn -0.0478 0.0236 0.9986
vn -0.1067 0.0541 0.9928
vn -0.2175 0.1474 0.9649
vn -0.1188 0.0869 0.9891
vn -0.5343 0.2094 0.8189
vn -0.6697 0.3666 0.6458
vn -0.5488 0.3647 0.7522
vn -0.3814 0.2203 0.8978
vn -0.1853 0.0752 0.9798
vn -0.2645 0.0986 0.9593
vn 0.7473 -0.3221 0.5813
vn -0.0076 -0.6574 0.7535
vn -0.1618 -0.6419 0.7495
vn -0.1855 -0.9085 0.3744
vn -0.0012 -0.9131 0.4078
vn 0.0000 -0.9891 0.1476
vn -0.2274 -0.9644 0.1347
vn -0.2401 -0.9706 0.0171
vn 0.0000 -0.9998 0.0186
vn -0.4973 -0.5491 0.6716
vn -0.6264 -0.6940 0.3549
vn -0.6650 -0.7360 0.1269
vn -0.6648 -0.7468 0.0168
vn -0.0131 -0.3194 0.9475
vn -0.0110 -0.1227 0.9924
vn -0.2233 -0.1417 0.9644
vn -0.2043 -0.2815 0.9375
vn -0.0060 -0.0294 0.9995
vn -0.0026 -0.0107 0.9999
vn -0.0912 -0.0451 0.9948
vn -0.1653 -0.0746 0.9834
vn -0.5355 -0.2296 0.8128
vn -0.7635 -0.3252 0.5580
vn -0.8229 -0.4031 0.4005
vn -0.5642 -0.2980 0.7699
vn -0.7026 -0.2703 0.6583
vn -0.8611 -0.3290 0.3876
vn -0.8915 -0.3675 0.2651
vn -0.9265 -0.3542 0.1274
vn -0.9272 -0.3740 0.0179
vn -0.9275 -0.3734 0.0186
vn -0.9177 -0.3798 0.1164
vn -0.8700 -0.4770 0.1251
vn -0.8803 -0.4740 0.0184
vn -0.5770 -0.2292 0.7839
vn -0.8208 -0.3385 0.4601
vn -0.8518 -0.3382 0.4001
vn -0.6603 -0.2455 0.7098
vn -0.3758 -0.1542 0.9138
vn -0.2896 -0.1158 0.9501
vn -0.9124 -0.3840 0.1417
vn -0.9254 -0.3788 0.0144
vn -0.8950 -0.3792 0.2350
vn -0.9270 -0.3531 0.1265
vn -0.9296 -0.3683 0.0143
vn -0.9275 -0.3737 0.0111
vn -0.9268 -0.3736 0.0384
vn -0.8927 -0.3323 0.3044
vn -0.0006 -0.0031 1.0000
vn -0.0165 -0.0079 0.9998
vn -0.0415 -0.0209 0.9989
vn -0.0049 -0.0036 1.0000
vn -0.2077 -0.0811 0.9748
vn -0.1280 -0.0574 0.9901
vn -0.3310 -0.1326 0.9343
vn -0.4968 -0.2061 0.8430
vn -0.0637 -0.0313 0.9975
vn -0.0276 -0.0136 0.9995
vn -0.1640 -0.0706 0.9839
vn -0.2486 -0.0972 0.9637
vn -0.0094 -0.0059 0.9999
vn -0.0401 -0.0203 0.9990
vn -0.0888 -0.0442 0.9951
vn -0.0046 -0.0035 1.0000
vn -0.0158 -0.0077 0.9998
vn -0.6090 -0.2377 0.7568
vn -0.8354 -0.3568 0.4180
vn -0.8488 -0.3292 0.4137
vn -0.6668 -0.2601 0.6983
vn -0.9100 -0.3923 0.1338
vn -0.9277 -0.3728 0.0179
vn -0.9215 -0.3630 0.1378
vn -0.9175 -0.3800 0.1180
vn -0.6585 -0.2443 0.7119
vn -0.8507 -0.3385 0.4020
vn -0.8604 -0.3294 0.3888
vn -0.7006 -0.2700 0.6605
vn -0.5402 -0.2221 0.8117
vn -0.7620 -0.3254 0.5599
vn -0.3725 -0.1522 0.9155
vn -0.9123 -0.3837 0.1429
vn -0.9257 -0.3780 0.0154
vn -0.9273 -0.3738 0.0182
vn -0.9261 -0.3548 0.1283
vn -0.9267 -0.3736 0.0408
vn -0.9274 -0.3738 0.0127
vn -0.8908 -0.3675 0.2672
vn -0.4940 -0.2048 0.8450
vn -0.7351 -0.3176 0.5990
vn -0.8201 -0.3373 0.4623
vn -0.5747 -0.2281 0.7860
vn -0.2865 -0.1140 0.9513
vn -0.2051 -0.0801 0.9755
vn -0.1258 -0.0567 0.9904
vn -0.0622 -0.0305 0.9976
vn -0.2454 -0.0963 0.9646
vn -0.3282 -0.1318 0.9354
vn -0.9212 -0.3635 0.1387
vn -0.9276 -0.3730 0.0182
vn -0.9293 -0.3691 0.0153
vn -0.9268 -0.3530 0.1284
vn -0.5370 -0.2216 0.8140
vn -0.7605 -0.3257 0.5618
vn -0.8347 -0.3564 0.4198
vn -0.6066 -0.2373 0.7588
vn -0.6987 -0.2698 0.6626
vn -0.8597 -0.3297 0.3901
vn -0.8902 -0.3676 0.2693
vn -0.9257 -0.3555 0.1292
vn -0.9274 -0.3736 0.0184
vn -0.9172 -0.3801 0.1194
vn -0.9101 -0.3918 0.1349
vn -0.6651 -0.2588 0.7005
vn -0.8481 -0.3286 0.4156
vn -0.8925 -0.3311 0.3063
vn -0.8944 -0.3786 0.2381
vn -0.7369 -0.3184 0.5963
vn -0.0001 0.0004 1.0000
vn -0.0019 0.0106 0.9999
vn 0.0038 0.0087 1.0000
vn 0.0001 0.0004 1.0000
vn -0.0061 0.0339 0.9994
vn -0.0144 0.0689 0.9975
vn 0.0512 0.0531 0.9973
vn 0.0186 0.0253 0.9995
vn 0.0001 0.0001 1.0000
vn 0.0028 0.0026 1.0000
vn 0.0124 0.0070 0.9999
vn 0.0340 0.0171 0.9993
vn 0.0012 0.0012 1.0000
vn -0.0283 0.1408 0.9896
vn -0.0460 0.2187 0.9747
vn 0.2046 0.1592 0.9658
vn 0.1134 0.1057 0.9879
vn 0.3754 0.2671 0.8876
vn 0.4217 0.4767 0.7713
vn 0.6443 0.5121 0.5681
vn 0.5900 0.2310 0.7737
vn -0.1348 0.5233 0.8414
vn -0.0748 0.3836 0.9205
vn -0.3202 0.7344 0.5984
vn -0.1441 0.9892 0.0263
vn 0.7700 0.6378 0.0190
vn 0.7247 0.6702 0.1600
vn -0.2107 0.9642 0.1612
vn 0.0759 0.0370 0.9964
vn 0.1445 0.0617 0.9876
vn 0.0215 0.0096 0.9997
vn 0.0072 0.0047 1.0000
vn 0.2260 0.0868 0.9702
vn 0.3080 0.1270 0.9429
vn 0.1098 0.0542 0.9925
vn 0.0507 0.0244 0.9984
vn -0.0268 -0.0132 0.9996
vn -0.0091 -0.0057 0.9999
vn -0.0865 -0.0433 0.9953
vn -0.1610 -0.0696 0.9845
vn -0.0017 -0.0017 1.0000
vn -0.0151 -0.0075 0.9999
vn -0.0388 -0.0197 0.9991
vn -0.5723 -0.2269 0.7880
vn -0.8194 -0.3361 0.4644
vn -0.8497 -0.3389 0.4040
vn -0.6567 -0.2430 0.7139
vn -0.3688 -0.1507 0.9172
vn -0.2836 -0.1122 0.9524
vn -0.2025 -0.0791 0.9761
vn -0.1236 -0.0561 0.9907
vn -0.3255 -0.1311 0.9364
vn -0.4912 -0.2036 0.8469
vn -0.7332 -0.3169 0.6017
vn -0.8937 -0.3781 0.2414
vn -0.9123 -0.3834 0.1442
vn -0.0005 -0.0005 1.0000
vn -0.0043 -0.0033 1.0000
vn 0.0023 0.0023 1.0000
vn 0.0115 0.0069 0.9999
vn -0.0606 -0.0297 0.9977
vn -0.0260 -0.0127 0.9996
vn -0.1581 -0.0685 0.9851
vn -0.2423 -0.0952 0.9655
vn -0.0088 -0.0056 0.9999
vn -0.0380 -0.0193 0.9991
vn -0.0847 -0.0422 0.9955
vn -0.9266 -0.3528 0.1302
vn -0.9290 -0.3698 0.0162
vn -0.9274 -0.3739 0.0142
vn -0.9266 -0.3737 0.0430
vn -0.6042 -0.2370 0.7608
vn -0.8339 -0.3561 0.4216
vn -0.8475 -0.3279 0.4175
vn -0.6633 -0.2576 0.7026
vn -0.9101 -0.3914 0.1360
vn -0.9276 -0.3732 0.0184
vn -0.9209 -0.3640 0.1397
vn -0.9169 -0.3803 0.1209
vn -0.8895 -0.3676 0.2713
vn -0.8923 -0.3299 0.3082
vn -0.6548 -0.2414 0.7162
vn -0.8486 -0.3392 0.4061
vn -0.8590 -0.3301 0.3913
vn -0.6968 -0.2695 0.6647
vn -0.5337 -0.2211 0.8163
vn -0.7589 -0.3259 0.5637
vn -0.3653 -0.1487 0.9189
vn -0.9122 -0.3831 0.1454
vn -0.9262 -0.3766 0.0173
vn -0.9254 -0.3561 0.1300
vn -0.4880 -0.2027 0.8490
vn -0.7308 -0.3162 0.6049
vn -0.8185 -0.3348 0.4669
vn -0.5697 -0.2255 0.7903
vn -0.2810 -0.1100 0.9534
vn -0.2004 -0.0786 0.9766
vn -0.9206 -0.3645 0.1405
vn -0.9286 -0.3706 0.0172
vn -0.9264 -0.3526 0.1320
vn -0.9265 -0.3737 0.0452
vn -0.9273 -0.3739 0.0157
vn -0.6612 -0.2564 0.7050
vn -0.8467 -0.3273 0.4195
vn -0.8921 -0.3287 0.3101
vn -0.8930 -0.3777 0.2447
vn -0.9259 -0.3773 0.0164
vn 0.9279 -0.3723 -0.0187
vn 0.9300 -0.3482 -0.1180
vn 0.9201 -0.3638 -0.1453
vn 0.9160 -0.3795 -0.1302
vn 0.9233 -0.3602 -0.1335
vn 0.9108 -0.3873 -0.1430
vn 0.8291 -0.3525 -0.4340
vn 0.5876 -0.2331 -0.7749
vn 0.5140 -0.2134 -0.8308
vn 0.7480 -0.3222 -0.5802
vn 0.8541 -0.3304 -0.4016
vn 0.6807 -0.2654 -0.6828
vn 0.8861 -0.3662 -0.2841
vn 0.8449 -0.3194 -0.4292
vn 0.6490 -0.2484 -0.7191
vn 0.8890 -0.3302 -0.3173
vn 0.9179 -0.3826 -0.1054
vn 0.9299 -0.3482 -0.1184
vn 0.9200 -0.3638 -0.1456
vn 0.9108 -0.3871 -0.1434
vn 0.9159 -0.3795 -0.1308
vn 0.8447 -0.3187 -0.4300
vn 0.6480 -0.2478 -0.7202
vn 0.5864 -0.2328 -0.7758
vn 0.8288 -0.3523 -0.4348
vn 0.8426 -0.3527 -0.4069
vn 0.6307 -0.2411 -0.7376
vn 0.5367 -0.2089 -0.8175
vn 0.7654 -0.3096 -0.5641
vn 0.3459 -0.1390 -0.9279
vn 0.2653 -0.0984 -0.9591
vn 0.1865 -0.0750 -0.9796
vn 0.1082 -0.0542 -0.9927
vn 0.3051 -0.1274 -0.9438
vn 0.4604 -0.1846 -0.8683
vn 0.9107 -0.3924 -0.1289
vn 0.8888 -0.3296 -0.3183
vn 0.8908 -0.3756 -0.2558
vn 0.7149 -0.2834 -0.6392
vn 0.8859 -0.3661 -0.2849
vn 0.9180 -0.3825 -0.1050
vn 0.8910 -0.3758 -0.2547
vn 0.9301 -0.3482 -0.1170
vn 0.9202 -0.3638 -0.1447
vn 0.9181 -0.3824 -0.1042
vn 0.8893 -0.3313 -0.3152
vn 0.8452 -0.3207 -0.4275
vn 0.8915 -0.3761 -0.2526
vn 0.7867 -0.6169 -0.0237
vn 0.3473 -0.9373 -0.0275
vn 0.3457 -0.9216 -0.1764
vn 0.7737 -0.6157 -0.1495
vn 0.0433 -0.9988 -0.0225
vn -0.0025 -0.9998 -0.0212
vn -0.0293 -0.9849 -0.1705
vn 0.0664 -0.9839 -0.1662
vn 0.0858 -0.9112 -0.4029
vn -0.0614 -0.9086 -0.4132
vn -0.0836 -0.6583 -0.7481
vn 0.0975 -0.6589 -0.7459
vn 0.4266 -0.7779 -0.4614
vn 0.3052 -0.6117 -0.7298
vn 0.7537 -0.5703 -0.3268
vn 0.9238 -0.3593 -0.1324
vn 0.9109 -0.3922 -0.1284
vn 0.8306 -0.3665 -0.4192
vn 0.6730 -0.2736 -0.6872
vn 0.6327 -0.2463 -0.7342
vn 0.8456 -0.3516 -0.4017
vn 0.6507 -0.4557 -0.6074
vn 0.4323 -0.3335 -0.8378
vn 0.3277 -0.1703 -0.9293
vn 0.7711 -0.3134 -0.5542
vn 0.5438 -0.2120 -0.8120
vn 0.4656 -0.1876 -0.8649
vn 0.7185 -0.2897 -0.6324
vn 0.2670 -0.1016 -0.9583
vn 0.1893 -0.0758 -0.9790
vn -0.1006 -0.3124 -0.9446
vn -0.0917 -0.1347 -0.9866
vn 0.1089 -0.1350 -0.9848
vn 0.1145 -0.3076 -0.9446
vn -0.0563 -0.0405 -0.9976
vn -0.0267 -0.0152 -0.9995
vn 0.0328 -0.0179 -0.9993
vn 0.0692 -0.0448 -0.9966
vn 0.6508 -0.2495 -0.7170
vn -0.2952 -0.9551 -0.0242
vn -0.7749 -0.6317 -0.0211
vn -0.7583 -0.6325 -0.1576
vn -0.2935 -0.9380 -0.1847
vn -0.7342 -0.5855 -0.3437
vn -0.3817 -0.7883 -0.4827
vn -0.9267 -0.3753 -0.0187
vn -0.9092 -0.3944 -0.1332
vn -0.9199 -0.3676 -0.1368
vn -0.9255 -0.3784 -0.0182
vn -0.8353 -0.3585 -0.4169
vn -0.6050 -0.2451 -0.7576
vn -0.6524 -0.2712 -0.7077
vn -0.8221 -0.3704 -0.4325
vn -0.6172 -0.4675 -0.6328
vn -0.3999 -0.3387 -0.8517
vn -0.3088 -0.1675 -0.9363
vn -0.5414 -0.2234 -0.8105
vn -0.3735 -0.1535 -0.9148
vn -0.1651 -0.0714 -0.9837
vn -0.2489 -0.0997 -0.9634
vn -0.9248 -0.3801 -0.0153
vn -0.9116 -0.3855 -0.1427
vn -0.9256 -0.3563 -0.1279
vn -0.9265 -0.3758 -0.0181
vn -0.9266 -0.3757 -0.0124
vn -0.9259 -0.3755 -0.0404
vn -0.8503 -0.3401 -0.4017
vn -0.6585 -0.2459 -0.7113
vn -0.7008 -0.2714 -0.6596
vn -0.8601 -0.3309 -0.3884
vn -0.9168 -0.3817 -0.1171
vn -0.7622 -0.3268 -0.5588
vn -0.8904 -0.3693 -0.2661
vn -0.2637 -0.6152 -0.7430
vn 0.9180 -0.3825 -0.1046
vn 0.9300 -0.3482 -0.1175
vn 0.9161 -0.3795 -0.1291
vn 0.9236 -0.3596 -0.1328
vn 0.9108 -0.3876 -0.1421
vn 0.8298 -0.3528 -0.4324
vn 0.5898 -0.2336 -0.7730
vn 0.5165 -0.2146 -0.8290
vn 0.7495 -0.3229 -0.5778
vn 0.8550 -0.3302 -0.4000
vn 0.6832 -0.2659 -0.6801
vn 0.8866 -0.3663 -0.2825
vn 0.8446 -0.3519 -0.4034
vn 0.6347 -0.2413 -0.7341
vn 0.5415 -0.2110 -0.8138
vn 0.7693 -0.3121 -0.5575
vn 0.3481 -0.1399 -0.9270
vn 0.2673 -0.0996 -0.9585
vn 0.9108 -0.3923 -0.1285
vn 0.8891 -0.3308 -0.3163
vn 0.8913 -0.3760 -0.2536
vn 0.9201 -0.3638 -0.1450
vn 0.9108 -0.3874 -0.1426
vn 0.9161 -0.3795 -0.1296
vn 0.8450 -0.3201 -0.4283
vn 0.6499 -0.2490 -0.7181
vn 0.5887 -0.2334 -0.7739
vn 0.8294 -0.3527 -0.4332
vn 0.9234 -0.3599 -0.1331
vn 0.9108 -0.3924 -0.1287
vn 0.8546 -0.3303 -0.4008
vn 0.6820 -0.2657 -0.6814
vn 0.6327 -0.2412 -0.7359
vn 0.8436 -0.3523 -0.4052
vn 0.7488 -0.3226 -0.5790
vn 0.5153 -0.2140 -0.8299
vn 0.3470 -0.1394 -0.9274
vn 0.1883 -0.0756 -0.9792
vn 0.1098 -0.0546 -0.9924
vn 0.3076 -0.1280 -0.9429
vn 0.4639 -0.1867 -0.8660
vn 0.0503 -0.0245 -0.9984
vn 0.0211 -0.0096 -0.9997
vn 0.1426 -0.0618 -0.9878
vn 0.2247 -0.0875 -0.9705
vn 0.7173 -0.2876 -0.6347
vn 0.8863 -0.3662 -0.2833
vn 0.1108 -0.0547 -0.9923
vn 0.0510 -0.0248 -0.9984
vn 0.2258 -0.0880 -0.9702
vn 0.3087 -0.1283 -0.9425
vn 0.0214 -0.0098 -0.9997
vn 0.0070 -0.0047 -1.0000
vn 0.0749 -0.0368 -0.9965
vn 0.1436 -0.0622 -0.9877
vn -0.0095 -0.0059 -0.9999
vn -0.0018 -0.0018 -1.0000
vn 0.0025 -0.0024 -1.0000
vn 0.0119 -0.0070 -0.9999
vn -0.0000 0.0000 -1.0000
vn 0.0012 -0.0012 -1.0000
vn 0.0116 -0.0070 -0.9999
vn 0.0332 -0.0170 -0.9993
vn 0.0023 -0.0023 -1.0000
vn 0.7674 -0.3109 -0.5608
vn 0.5391 -0.2099 -0.8157
vn 0.4621 -0.1856 -0.8672
vn 0.7161 -0.2855 -0.6370
vn 0.2663 -0.0990 -0.9588
vn 0.1874 -0.0753 -0.9794
vn 0.1090 -0.0544 -0.9926
vn 0.0497 -0.0242 -0.9985
vn 0.2236 -0.0870 -0.9708
vn 0.3063 -0.1277 -0.9433
vn 0.0069 -0.0046 -1.0000
vn 0.0011 -0.0011 -1.0000
vn 0.0328 -0.0168 -0.9993
vn 0.0742 -0.0365 -0.9966
vn 0.0115 -0.0069 -0.9999
vn 0.0207 -0.0094 -0.9997
vn 0.0068 -0.0045 -1.0000
vn 0.0735 -0.0361 -0.9966
vn 0.1417 -0.0615 -0.9880
vn 0.0113 -0.0068 -0.9999
vn 0.0325 -0.0166 -0.9993
vn -0.0019 0.0019 -1.0000
vn -0.0098 0.0061 -0.9999
vn -0.0285 0.0141 -0.9995
vn -0.0007 0.0007 -1.0000
vn -0.0654 0.0319 -0.9974
vn -0.0052 0.0037 -1.0000
vn 0.0019 0.0056 -1.0000
vn 0.0098 0.0182 -0.9998
vn -0.0098 0.0182 -0.9998
vn -0.0019 0.0056 -1.0000
vn 0.0270 0.0412 -0.9988
vn 0.0570 0.0826 -0.9949
vn -0.0638 0.0792 -0.9948
vn -0.0286 0.0395 -0.9988
vn -0.1300 0.0577 -0.9898
vn -0.2096 0.0812 -0.9744
vn -0.0423 0.0211 -0.9989
vn -0.0170 0.0081 -0.9998
vn -0.2912 0.1159 -0.9496
vn -0.3777 0.1531 -0.9132
vn -0.1680 0.0714 -0.9832
vn -0.0922 0.0453 -0.9947
vn -0.2840 0.2863 -0.9151
vn 0.2636 0.3087 -0.9139
vn 0.2413 0.5554 -0.7958
vn -0.2712 0.5436 -0.7943
vn 0.1086 0.1477 -0.9831
vn -0.1246 0.1404 -0.9822
vn -0.7651 0.5737 -0.2924
vn 0.5141 0.7822 -0.3521
vn 0.3658 0.9303 -0.0286
vn -0.7062 0.7077 -0.0216
vn 0.1858 0.7011 -0.6885
vn -0.5509 0.6870 -0.4738
vn -0.8529 0.3363 -0.3993
vn -0.6615 0.2445 -0.7090
vn -0.5787 0.2285 -0.7828
vn -0.5332 0.5364 -0.6542
vn 0.4687 0.5737 -0.6717
vn 0.5701 0.2536 -0.7815
vn 0.6509 0.2619 -0.7126
vn 0.8244 0.3504 -0.4445
vn -0.2870 -0.1151 -0.9510
vn -0.2050 -0.0806 -0.9754
vn -0.0402 -0.0205 -0.9990
vn -0.0894 -0.0446 -0.9950
vn -0.1254 -0.0569 -0.9905
vn -0.0617 -0.0304 -0.9976
vn -0.0046 -0.0034 -1.0000
vn -0.0157 -0.0077 -0.9998
vn -0.9269 -0.3749 -0.0181
vn -0.9205 -0.3653 -0.1389
vn -0.9261 -0.3549 -0.1282
vn -0.9286 -0.3709 -0.0151
vn -0.7345 -0.3190 -0.5989
vn -0.4936 -0.2058 -0.8450
vn -0.5745 -0.2294 -0.7857
vn -0.8195 -0.3391 -0.4620
vn -0.8474 -0.3302 -0.4158
vn -0.6643 -0.2600 -0.7008
vn -0.8918 -0.3331 -0.3063
vn -0.7593 -0.3273 -0.5624
vn -0.5351 -0.2225 -0.8149
vn -0.6055 -0.2385 -0.7593
vn -0.8338 -0.3579 -0.4203
vn -0.2440 -0.0964 -0.9650
vn -0.3274 -0.1323 -0.9356
vn -0.9093 -0.3935 -0.1353
vn -0.8937 -0.3804 -0.2377
vn -0.0265 -0.0130 -0.9996
vn -0.0089 -0.0056 -0.9999
vn -0.0006 -0.0006 -1.0000
vn -0.0016 -0.0016 -1.0000
vn -0.3666 -0.1502 -0.9182
vn -0.2816 -0.1112 -0.9531
vn -0.0854 -0.0427 -0.9954
vn -0.1594 -0.0693 -0.9848
vn -0.2004 -0.0791 -0.9765
vn -0.1213 -0.0560 -0.9910
vn -0.0145 -0.0074 -0.9999
vn -0.0381 -0.0195 -0.9991
vn -0.9267 -0.3754 -0.0186
vn -0.9249 -0.3575 -0.1296
vn -0.9163 -0.3820 -0.1200
vn -0.8587 -0.3316 -0.3908
vn -0.8892 -0.3693 -0.2701
vn -0.9280 -0.3723 -0.0169
vn -0.9257 -0.3545 -0.1318
vn -0.9257 -0.3756 -0.0447
vn -0.9266 -0.3758 -0.0153
vn -0.9254 -0.3787 -0.0171
vn -0.9114 -0.3850 -0.1451
vn -0.8925 -0.3794 -0.2440
vn -0.8180 -0.3367 -0.4664
vn -0.5698 -0.2270 -0.7898
vn -0.6550 -0.2432 -0.7154
vn -0.8482 -0.3407 -0.4056
vn -0.9094 -0.3926 -0.1373
vn -0.9199 -0.3662 -0.1406
vn -0.9267 -0.3753 -0.0186
vn -0.8324 -0.3573 -0.4237
vn -0.6009 -0.2379 -0.7631
vn -0.6607 -0.2577 -0.7051
vn -0.8461 -0.3289 -0.4195
vn -0.7305 -0.3176 -0.6046
vn -0.4878 -0.2037 -0.8488
vn -0.3219 -0.1313 -0.9376
vn -0.9159 -0.3822 -0.1228
vn -0.8913 -0.3308 -0.3100
vn -0.8880 -0.3694 -0.2739
vn -0.6971 -0.2710 -0.6638
vn 0.0098 0.0061 -0.9999
vn 0.0019 0.0019 -1.0000
vn 0.0016 0.0016 -1.0000
vn 0.0086 0.0054 -0.9999
vn 0.0687 0.0370 -0.9970
vn 0.0293 0.0166 -0.9994
vn -0.0587 -0.0289 -0.9979
vn -0.0250 -0.0121 -0.9996
vn -0.0004 -0.0004 -1.0000
vn -0.0040 -0.0032 -1.0000
vn -0.0084 -0.0053 -1.0000
vn -0.0015 -0.0015 -1.0000
vn 0.0254 0.0123 -0.9996
vn 0.0593 0.0290 -0.9978
vn 0.2259 0.1001 -0.9690
vn 0.1376 0.0676 -0.9882
vn 0.1219 0.0559 -0.9910
vn 0.2007 0.0786 -0.9765
vn 0.4885 0.2026 -0.8487
vn 0.3190 0.1342 -0.9382
vn 0.0041 0.0032 -1.0000
vn 0.0004 0.0004 -1.0000
vn 0.0381 0.0194 -0.9991
vn 0.0146 0.0074 -0.9999
vn -0.5289 -0.2216 -0.8193
vn -0.3598 -0.1466 -0.9214
vn -0.1538 -0.0671 -0.9858
vn -0.2379 -0.0945 -0.9667
vn -0.2767 -0.1070 -0.9550
vn -0.1963 -0.0782 -0.9774
vn -0.0365 -0.0188 -0.9992
vn -0.0818 -0.0406 -0.9958
vn -0.9259 -0.3774 -0.0188
vn -0.9112 -0.3846 -0.1475
vn -0.9242 -0.3587 -0.1312
vn -0.9268 -0.3750 -0.0190
vn -0.9265 -0.3758 -0.0180
vn -0.9255 -0.3755 -0.0486
vn -0.8460 -0.3413 -0.4097
vn -0.6515 -0.2400 -0.7197
vn -0.6935 -0.2705 -0.6678
vn -0.8574 -0.3323 -0.3931
vn -0.9266 -0.3756 -0.0190
vn -0.9193 -0.3670 -0.1423
vn -0.9254 -0.3540 -0.1353
vn -0.9274 -0.3736 -0.0186
vn -0.7259 -0.3164 -0.6107
vn -0.4817 -0.2020 -0.8528
vn -0.5648 -0.2242 -0.7942
vn -0.8163 -0.3341 -0.4712
vn -0.8447 -0.3276 -0.4233
vn -0.6567 -0.2555 -0.7096
vn -0.8910 -0.3282 -0.3137
vn -0.7564 -0.3278 -0.5661
vn -0.8909 -0.3787 -0.2506
vn -0.1172 -0.0556 -0.9915
vn -0.0556 -0.0274 -0.9981
vn -0.0034 -0.0029 -1.0000
vn -0.0135 -0.0073 -0.9999
vn -0.0235 -0.0112 -0.9997
vn -0.0078 -0.0051 -1.0000
vn -0.0003 -0.0003 -1.0000
vn -0.7533 -0.3274 -0.5705
vn -0.5231 -0.2200 -0.8234
vn -0.5962 -0.2372 -0.7670
vn -0.8309 -0.3566 -0.4271
vn -0.2325 -0.0924 -0.9682
vn -0.3166 -0.1306 -0.9395
vn -0.3539 -0.1436 -0.9242
vn -0.2721 -0.1035 -0.9567
vn -0.0785 -0.0388 -0.9962
vn -0.1489 -0.0651 -0.9867
vn -0.9095 -0.3917 -0.1393
vn 0.7312 0.3160 -0.6045
vn 0.6155 -0.7880 -0.0171
vn 0.2280 -0.9735 -0.0171
vn 0.2154 -0.9672 -0.1345
vn 0.6229 -0.7711 -0.1319
vn 0.5966 -0.7176 -0.3594
vn 0.1732 -0.9124 -0.3709
vn 0.1441 -0.6520 -0.7444
vn 0.4700 -0.5709 -0.6732
vn 0.9279 -0.3725 -0.0187
vn 0.9161 -0.3797 -0.1286
vn 0.9237 -0.3596 -0.1325
vn 0.9180 -0.3826 -0.1043
vn 0.9300 -0.3484 -0.1172
vn 0.9108 -0.3925 -0.1285
vn 0.8452 -0.3518 -0.4022
vn 0.6361 -0.2416 -0.7328
vn 0.5432 -0.2118 -0.8125
vn 0.7705 -0.3132 -0.5552
vn 0.8891 -0.3314 -0.3156
vn 0.8913 -0.3763 -0.2529
vn 0.8066 -0.4193 -0.4167
vn 0.5384 -0.3099 -0.7836
vn 0.5069 -0.2240 -0.8324
vn 0.7501 -0.3234 -0.5769
vn 0.1788 -0.2858 -0.9415
vn 0.1961 -0.1360 -0.9711
vn 0.1419 -0.0675 -0.9876
vn 0.0755 -0.0371 -0.9965
vn 0.2681 -0.1002 -0.9582
vn 0.3479 -0.1417 -0.9268
vn 0.8546 -0.5190 -0.0189
vn 0.8481 -0.5120 -0.1366
vn 0.8552 -0.3303 -0.3994
vn 0.6841 -0.2663 -0.6790
vn 0.8867 -0.3665 -0.2820
vn -0.9235 -0.3607 -0.1307
vn -0.9155 -0.3824 -0.1254
vn -0.9292 -0.3512 -0.1153
vn -0.9172 -0.3851 -0.1026
vn -0.9098 -0.3949 -0.1275
vn -0.7769 -0.3202 -0.5422
vn -0.5520 -0.2173 -0.8050
vn -0.6437 -0.2440 -0.7254
vn -0.8483 -0.3527 -0.3948
vn -0.8912 -0.3796 -0.2485
vn -0.8887 -0.3363 -0.3118
vn -0.6890 -0.2698 -0.6726
vn -0.8563 -0.3325 -0.3952
vn -0.8869 -0.3693 -0.2776
vn 0.9231 -0.3607 -0.1337
vn 0.9106 -0.3927 -0.1291
vn 0.9279 -0.3725 -0.0186
vn 0.9177 -0.3828 -0.1058
vn 0.8537 -0.3306 -0.4024
vn 0.6795 -0.2653 -0.6840
vn 0.6288 -0.2411 -0.7393
vn 0.8416 -0.3533 -0.4086
vn 0.9298 -0.3484 -0.1189
vn 0.9199 -0.3640 -0.1459
vn 0.7635 -0.3086 -0.5674
vn 0.5343 -0.2080 -0.8193
vn 0.4586 -0.1836 -0.8695
vn 0.7136 -0.2815 -0.6415
vn 0.8444 -0.3182 -0.4309
vn 0.6470 -0.2473 -0.7213
vn 0.8886 -0.3292 -0.3194
vn 0.8905 -0.3756 -0.2568
vn 0.9158 -0.3797 -0.1307
vn 0.8858 -0.3663 -0.2848
vn 0.9235 -0.3599 -0.1329
vn 0.9107 -0.3925 -0.1287
vn 0.9179 -0.3827 -0.1048
vn 0.8547 -0.3304 -0.4004
vn 0.6826 -0.2660 -0.6807
vn 0.6337 -0.2414 -0.7350
vn 0.8440 -0.3523 -0.4043
vn 0.9160 -0.3797 -0.1293
vn 0.8910 -0.3761 -0.2542
vn 0.8864 -0.3664 -0.2829
vn 0.9159 -0.3797 -0.1300
vn 0.9233 -0.3603 -0.1333
vn 0.9299 -0.3484 -0.1177
vn 0.9200 -0.3640 -0.1452
vn 0.7682 -0.3117 -0.5592
vn 0.5403 -0.2106 -0.8147
vn 0.4629 -0.1862 -0.8666
vn 0.7166 -0.2867 -0.6359
vn 0.8448 -0.3199 -0.4288
vn 0.6493 -0.2488 -0.7187
vn 0.8890 -0.3307 -0.3169
vn 0.8291 -0.3527 -0.4337
vn 0.5880 -0.2334 -0.7745
vn 0.5144 -0.2138 -0.8305
vn 0.7482 -0.3225 -0.5798
vn 0.3069 -0.1279 -0.9431
vn 0.2240 -0.0872 -0.9707
vn 0.9107 -0.3875 -0.1428
vn 0.8542 -0.3305 -0.4014
vn 0.6811 -0.2656 -0.6823
vn 0.8861 -0.3664 -0.2839
vn 0.9201 -0.3640 -0.1448
vn 0.9107 -0.3878 -0.1423
vn 0.8451 -0.3207 -0.4278
vn 0.6505 -0.2495 -0.7174
vn 0.5893 -0.2337 -0.7734
vn 0.8295 -0.3529 -0.4328
vn 0.7180 -0.2892 -0.6331
vn 0.4651 -0.1875 -0.8652
vn 0.3084 -0.1282 -0.9426
vn 0.2254 -0.0879 -0.9703
vn 0.1432 -0.0621 -0.9877
vn 0.3476 -0.1398 -0.9272
vn 0.5159 -0.2145 -0.8293
vn 0.0334 -0.0171 -0.9993
vn 0.0118 -0.0070 -0.9999
vn 0.1105 -0.0547 -0.9924
vn 0.1890 -0.0758 -0.9790
vn 0.0024 -0.0024 -1.0000
vn 0.0213 -0.0097 -0.9997
vn 0.0508 -0.0247 -0.9984
vn 0.7491 -0.3229 -0.5784
vn 0.0746 -0.0367 -0.9965
vn 0.0330 -0.0169 -0.9993
vn 0.1878 -0.0755 -0.9793
vn 0.2668 -0.0994 -0.9586
vn 0.0499 -0.0243 -0.9985
vn 0.1094 -0.0545 -0.9925
vn 0.0070 -0.0046 -1.0000
vn 0.9178 -0.3828 -0.1053
vn 0.9299 -0.3484 -0.1183
vn 0.9106 -0.3926 -0.1289
vn 0.8428 -0.3528 -0.4065
vn 0.6312 -0.2412 -0.7371
vn 0.5373 -0.2093 -0.8170
vn 0.7659 -0.3101 -0.5632
vn 0.8888 -0.3299 -0.3181
vn 0.8908 -0.3758 -0.2555
vn 0.9200 -0.3640 -0.1456
vn 0.9107 -0.3873 -0.1433
vn 0.8446 -0.3191 -0.4299
vn 0.6482 -0.2480 -0.7200
vn 0.5866 -0.2330 -0.7757
vn 0.8287 -0.3525 -0.4347
vn 0.7151 -0.2841 -0.6387
vn 0.4608 -0.1849 -0.8680
vn 0.3053 -0.1275 -0.9437
vn 0.1420 -0.0616 -0.9879
vn 0.0737 -0.0362 -0.9966
vn 0.2656 -0.0986 -0.9590
vn 0.3462 -0.1392 -0.9278
vn 0.0326 -0.0166 -0.9993
vn 0.0114 -0.0068 -0.9999
vn 0.1083 -0.0543 -0.9926
vn 0.1867 -0.0751 -0.9795
vn 0.2226 -0.0867 -0.9711
vn 0.1408 -0.0612 -0.9881
vn 0.3448 -0.1386 -0.9284
vn 0.5129 -0.2131 -0.8316
vn 0.0729 -0.0358 -0.9967
vn 0.0321 -0.0164 -0.9993
vn 0.1856 -0.0747 -0.9798
vn 0.2643 -0.0978 -0.9595
vn 0.0205 -0.0093 -0.9997
vn 0.0492 -0.0240 -0.9985
vn 0.0066 -0.0045 -1.0000
vn 0.0068 -0.0046 -1.0000
vn 0.0209 -0.0095 -0.9997
vn -0.0001 0.0001 -1.0000
vn -0.0038 0.0055 -1.0000
vn -0.0010 0.0010 -1.0000
vn -0.0186 0.0199 -0.9996
vn -0.0524 0.0407 -0.9978
vn -0.0196 0.0091 -0.9998
vn -0.0063 0.0043 -1.0000
vn -0.0022 0.0022 -1.0000
vn -0.0112 0.0067 -0.9999
vn -0.0322 0.0165 -0.9993
vn -0.0732 0.0361 -0.9967
vn -0.0067 0.0045 -1.0000
vn -0.0011 0.0011 -1.0000
vn -0.1188 0.0869 -0.9891
vn -0.2175 0.1474 -0.9649
vn -0.1067 0.0541 -0.9928
vn -0.0478 0.0236 -0.9986
vn -0.6697 0.3665 -0.6459
vn -0.5343 0.2094 -0.8189
vn -0.3814 0.2203 -0.8978
vn -0.5488 0.3647 -0.7523
vn -0.2645 0.0986 -0.9593
vn -0.1853 0.0752 -0.9798
vn 0.7473 -0.3221 -0.5813
vn 0.0000 -0.9998 -0.0186
vn -0.2401 -0.9706 -0.0172
vn -0.2274 -0.9644 -0.1347
vn -0.0000 -0.9890 -0.1476
vn -0.0012 -0.9131 -0.4078
vn -0.1855 -0.9085 -0.3744
vn -0.1618 -0.6419 -0.7496
vn -0.0076 -0.6573 -0.7536
vn -0.6648 -0.7468 -0.0168
vn -0.6650 -0.7360 -0.1269
vn -0.6264 -0.6940 -0.3550
vn -0.4973 -0.5491 -0.6717
vn -0.2043 -0.2815 -0.9376
vn -0.2232 -0.1417 -0.9644
vn -0.0110 -0.1227 -0.9924
vn -0.0131 -0.3194 -0.9475
vn -0.1653 -0.0746 -0.9834
vn -0.0912 -0.0451 -0.9948
vn -0.0026 -0.0108 -0.9999
vn -0.0060 -0.0294 -0.9995
vn -0.9272 -0.3740 -0.0179
vn -0.9265 -0.3542 -0.1274
vn -0.9177 -0.3798 -0.1165
vn -0.9275 -0.3734 -0.0186
vn -0.8803 -0.4740 -0.0184
vn -0.8700 -0.4769 -0.1252
vn -0.7635 -0.3252 -0.5580
vn -0.5354 -0.2296 -0.8128
vn -0.5642 -0.2980 -0.7700
vn -0.8229 -0.4030 -0.4005
vn -0.8611 -0.3290 -0.3877
vn -0.7026 -0.2702 -0.6583
vn -0.8914 -0.3675 -0.2652
vn -0.8208 -0.3385 -0.4602
vn -0.5769 -0.2292 -0.7840
vn -0.6602 -0.2455 -0.7098
vn -0.8517 -0.3382 -0.4002
vn -0.2896 -0.1158 -0.9501
vn -0.3757 -0.1542 -0.9138
vn -0.9254 -0.3788 -0.0144
vn -0.9124 -0.3840 -0.1417
vn -0.8950 -0.3792 -0.2351
vn -0.9296 -0.3683 -0.0143
vn -0.9270 -0.3531 -0.1266
vn -0.9268 -0.3736 -0.0384
vn -0.9275 -0.3737 -0.0111
vn -0.8927 -0.3323 -0.3045
vn -0.0415 -0.0209 -0.9989
vn -0.0165 -0.0079 -0.9998
vn -0.0006 -0.0031 -1.0000
vn -0.0049 -0.0036 -1.0000
vn -0.4968 -0.2061 -0.8430
vn -0.3309 -0.1325 -0.9343
vn -0.1280 -0.0574 -0.9901
vn -0.2077 -0.0811 -0.9748
vn -0.2486 -0.0972 -0.9637
vn -0.1640 -0.0706 -0.9839
vn -0.0276 -0.0136 -0.9995
vn -0.0638 -0.0313 -0.9975
vn -0.0888 -0.0442 -0.9951
vn -0.0401 -0.0203 -0.9990
vn -0.0094 -0.0059 -0.9999
vn -0.0158 -0.0077 -0.9998
vn -0.0046 -0.0035 -1.0000
vn -0.9100 -0.3923 -0.1339
vn -0.9215 -0.3630 -0.1379
vn -0.9277 -0.3728 -0.0179
vn -0.9174 -0.3800 -0.1180
vn -0.8354 -0.3567 -0.4181
vn -0.6089 -0.2377 -0.7568
vn -0.6668 -0.2601 -0.6984
vn -0.8488 -0.3292 -0.4137
vn -0.9257 -0.3780 -0.0154
vn -0.9123 -0.3837 -0.1430
vn -0.9261 -0.3548 -0.1283
vn -0.9273 -0.3738 -0.0182
vn -0.8507 -0.3385 -0.4021
vn -0.6584 -0.2443 -0.7119
vn -0.7006 -0.2700 -0.6605
vn -0.8604 -0.3293 -0.3889
vn -0.7620 -0.3254 -0.5599
vn -0.5402 -0.2220 -0.8117
vn -0.3725 -0.1522 -0.9155
vn -0.9274 -0.3738 -0.0127
vn -0.9267 -0.3736 -0.0408
vn -0.8908 -0.3675 -0.2673
vn -0.7351 -0.3176 -0.5990
vn -0.4940 -0.2048 -0.8450
vn -0.5746 -0.2281 -0.7860
vn -0.8201 -0.3373 -0.4623
vn -0.2050 -0.0801 -0.9755
vn -0.2865 -0.1140 -0.9513
vn -0.3282 -0.1318 -0.9354
vn -0.2454 -0.0962 -0.9646
vn -0.0622 -0.0305 -0.9976
vn -0.1258 -0.0567 -0.9904
vn -0.9276 -0.3730 -0.0182
vn -0.9212 -0.3635 -0.1388
vn -0.9268 -0.3530 -0.1284
vn -0.9293 -0.3691 -0.0153
vn -0.9274 -0.3736 -0.0184
vn -0.9257 -0.3555 -0.1292
vn -0.9172 -0.3801 -0.1195
vn -0.9101 -0.3918 -0.1350
vn -0.7605 -0.3256 -0.5619
vn -0.5369 -0.2216 -0.8140
vn -0.6066 -0.2373 -0.7588
vn -0.8347 -0.3564 -0.4199
vn -0.8597 -0.3297 -0.3902
vn -0.6986 -0.2697 -0.6627
vn -0.8902 -0.3675 -0.2693
vn -0.8481 -0.3286 -0.4156
vn -0.6651 -0.2588 -0.7005
vn -0.8925 -0.3311 -0.3064
vn -0.8944 -0.3786 -0.2382
vn -0.7369 -0.3183 -0.5963
vn 0.0001 0.0004 -1.0000
vn 0.0038 0.0087 -1.0000
vn -0.0019 0.0106 -0.9999
vn -0.0001 0.0004 -1.0000
vn 0.0186 0.0253 -0.9995
vn 0.0512 0.0531 -0.9973
vn -0.0144 0.0689 -0.9975
vn -0.0061 0.0339 -0.9994
vn 0.0028 0.0026 -1.0000
vn 0.0001 0.0001 -1.0000
vn 0.0012 0.0012 -1.0000
vn 0.0340 0.0171 -0.9993
vn 0.0124 0.0070 -0.9999
vn 0.1134 0.1057 -0.9879
vn 0.2046 0.1592 -0.9658
vn -0.0460 0.2186 -0.9747
vn -0.0283 0.1408 -0.9896
vn -0.2107 0.9642 -0.1613
vn 0.7247 0.6702 -0.1600
vn 0.7700 0.6378 -0.0190
vn -0.1441 0.9892 -0.0264
vn 0.4217 0.4766 -0.7714
vn 0.3753 0.2670 -0.8876
vn 0.5899 0.2310 -0.7737
vn 0.6443 0.5120 -0.5681
vn -0.0748 0.3836 -0.9205
vn -0.1348 0.5233 -0.8415
vn -0.3201 0.7344 -0.5984
vn 0.0072 0.0047 -1.0000
vn 0.0215 0.0096 -0.9997
vn 0.1445 0.0617 -0.9876
vn 0.0759 0.0370 -0.9964
vn 0.0507 0.0244 -0.9984
vn 0.1098 0.0542 -0.9925
vn 0.3080 0.1269 -0.9429
vn 0.2260 0.0868 -0.9703
vn -0.1610 -0.0696 -0.9845
vn -0.0865 -0.0433 -0.9953
vn -0.0091 -0.0057 -0.9999
vn -0.0268 -0.0132 -0.9996
vn -0.0388 -0.0197 -0.9991
vn -0.0151 -0.0075 -0.9999
vn -0.0017 -0.0017 -1.0000
vn -0.8193 -0.3361 -0.4645
vn -0.5723 -0.2269 -0.7881
vn -0.6566 -0.2430 -0.7140
vn -0.8497 -0.3389 -0.4041
vn -0.2835 -0.1122 -0.9524
vn -0.3688 -0.1506 -0.9172
vn -0.4912 -0.2036 -0.8469
vn -0.3254 -0.1311 -0.9364
vn -0.1236 -0.0561 -0.9907
vn -0.2025 -0.0791 -0.9761
vn -0.7332 -0.3169 -0.6017
vn -0.8937 -0.3781 -0.2414
vn -0.9123 -0.3834 -0.1442
vn -0.0043 -0.0033 -1.0000
vn -0.0005 -0.0005 -1.0000
vn 0.0115 0.0069 -0.9999
vn 0.0023 0.0023 -1.0000
vn -0.2422 -0.0952 -0.9655
vn -0.1580 -0.0684 -0.9851
vn -0.0260 -0.0127 -0.9996
vn -0.0606 -0.0297 -0.9977
vn -0.0847 -0.0422 -0.9955
vn -0.0380 -0.0193 -0.9991
vn -0.0088 -0.0056 -0.9999
vn -0.9290 -0.3698 -0.0162
vn -0.9266 -0.3528 -0.1302
vn -0.9266 -0.3737 -0.0430
vn -0.9274 -0.3739 -0.0142
vn -0.9101 -0.3914 -0.1361
vn -0.9209 -0.3640 -0.1397
vn -0.9276 -0.3732 -0.0184
vn -0.9169 -0.3802 -0.1209
vn -0.8339 -0.3561 -0.4216
vn -0.6042 -0.2370 -0.7608
vn -0.6633 -0.2575 -0.7027
vn -0.8474 -0.3279 -0.4175
vn -0.8895 -0.3676 -0.2713
vn -0.8922 -0.3299 -0.3083
vn -0.9262 -0.3766 -0.0173
vn -0.9122 -0.3831 -0.1455
vn -0.9254 -0.3561 -0.1301
vn -0.8485 -0.3392 -0.4062
vn -0.6548 -0.2414 -0.7162
vn -0.6967 -0.2695 -0.6648
vn -0.8590 -0.3301 -0.3914
vn -0.7589 -0.3259 -0.5638
vn -0.5337 -0.2211 -0.8163
vn -0.3652 -0.1487 -0.9190
vn -0.7308 -0.3162 -0.6049
vn -0.4879 -0.2027 -0.8490
vn -0.5697 -0.2254 -0.7903
vn -0.8185 -0.3348 -0.4670
vn -0.2003 -0.0786 -0.9766
vn -0.2810 -0.1100 -0.9534
vn -0.9206 -0.3644 -0.1406
vn -0.9264 -0.3526 -0.1321
vn -0.9286 -0.3706 -0.0172
vn -0.9273 -0.3739 -0.0157
vn -0.9265 -0.3737 -0.0452
vn -0.8467 -0.3273 -0.4195
vn -0.6612 -0.2564 -0.7050
vn -0.8920 -0.3287 -0.3102
vn -0.8930 -0.3777 -0.2448
vn -0.9259 -0.3773 -0.0164
vn 0.9298 -0.3481 0.1198
vn 0.9199 -0.3638 0.1465
vn 0.5830 -0.2320 0.7787
vn 0.8278 -0.3518 0.4371
vn 0.7449 -0.3208 0.5850
vn 0.5090 -0.2111 0.8345
vn 0.6758 -0.2642 0.6881
vn 0.8524 -0.3307 0.4050
vn 0.8852 -0.3660 0.2871
vn 0.9157 -0.3795 0.1324
vn 0.9226 -0.3614 0.1347
vn 0.9109 -0.3866 0.1446
vn 0.6452 -0.2460 0.7234
vn 0.8442 -0.3167 0.4325
vn 0.8884 -0.3277 0.3214
vn 0.9177 -0.3827 0.1066
vn 0.8901 -0.3751 0.2588
vn 0.9299 -0.3482 0.1189
vn 0.9200 -0.3638 0.1459
vn 0.9178 -0.3826 0.1058
vn 0.8887 -0.3290 0.3193
vn 0.8445 -0.3180 0.4308
vn 0.8906 -0.3754 0.2568
vn 0.9178 -0.3827 0.1062
vn 0.9298 -0.3481 0.1193
vn 0.5853 -0.2326 0.7768
vn 0.8284 -0.3521 0.4356
vn 0.7465 -0.3215 0.5826
vn 0.5115 -0.2123 0.8326
vn 0.6783 -0.2648 0.6854
vn 0.8533 -0.3305 0.4033
vn 0.8857 -0.3661 0.2856
vn 0.9158 -0.3795 0.1313
vn 0.9229 -0.3608 0.1341
vn 0.9108 -0.3869 0.1438
vn 0.6267 -0.2408 0.7411
vn 0.8406 -0.3535 0.4104
vn 0.7615 -0.3070 0.5709
vn 0.5318 -0.2068 0.8212
vn 0.2633 -0.0971 0.9598
vn 0.3437 -0.1381 0.9289
vn 0.8903 -0.3753 0.2578
vn 0.8886 -0.3283 0.3204
vn 0.9106 -0.3926 0.1292
vn 0.6795 -0.2651 0.6841
vn 0.8537 -0.3305 0.4024
vn 0.8416 -0.3531 0.4086
vn 0.6288 -0.2410 0.7393
vn 0.5128 -0.2129 0.8317
vn 0.7472 -0.3219 0.5814
vn 0.3448 -0.1385 0.9284
vn 0.9231 -0.3605 0.1337
vn 0.9106 -0.3925 0.1291
vn 0.5343 -0.2079 0.8194
vn 0.7635 -0.3084 0.5674
vn 0.7137 -0.2813 0.6415
vn 0.4587 -0.1835 0.8695
vn 0.2643 -0.0977 0.9595
vn 0.2224 -0.0865 0.9711
vn 0.1407 -0.0612 0.9882
vn 0.0204 -0.0093 0.9997
vn 0.0491 -0.0240 0.9985
vn 0.0728 -0.0358 0.9967
vn 0.0321 -0.0164 0.9994
vn 0.3039 -0.1271 0.9442
vn 0.2213 -0.0861 0.9714
vn 0.0485 -0.0237 0.9985
vn 0.1073 -0.0540 0.9928
vn 0.1397 -0.0609 0.9883
vn 0.0721 -0.0354 0.9968
vn 0.0065 -0.0044 1.0000
vn 0.0201 -0.0092 0.9998
vn 0.0112 -0.0068 0.9999
vn 0.0022 -0.0022 1.0000
vn 0.6471 -0.2472 0.7212
vn 0.6461 -0.2466 0.7223
vn 0.8444 -0.3173 0.4317
vn 0.8281 -0.3519 0.4363
vn 0.5841 -0.2323 0.7777
vn 0.9199 -0.3638 0.1462
vn 0.9108 -0.3867 0.1442
vn 0.9157 -0.3795 0.1318
vn 0.6771 -0.2645 0.6867
vn 0.8529 -0.3306 0.4041
vn 0.8396 -0.3539 0.4122
vn 0.6247 -0.2407 0.7428
vn 0.5103 -0.2117 0.8335
vn 0.7457 -0.3212 0.5838
vn 0.3425 -0.1376 0.9294
vn 0.9228 -0.3611 0.1344
vn 0.9105 -0.3927 0.1294
vn 0.4569 -0.1824 0.8706
vn 0.3026 -0.1268 0.9446
vn 0.1065 -0.0539 0.9929
vn 0.1847 -0.0744 0.9800
vn 0.2201 -0.0856 0.9717
vn 0.1387 -0.0605 0.9885
vn 0.0198 -0.0091 0.9998
vn 0.0479 -0.0234 0.9986
vn 0.7125 -0.2791 0.6438
vn 0.8854 -0.3661 0.2864
vn 0.5293 -0.2058 0.8231
vn 0.7594 -0.3057 0.5743
vn 0.7113 -0.2769 0.6461
vn 0.4551 -0.1813 0.8718
vn 0.1838 -0.0741 0.9802
vn 0.2623 -0.0965 0.9601
vn 0.3014 -0.1265 0.9451
vn 0.2189 -0.0852 0.9720
vn 0.0473 -0.0232 0.9986
vn 0.1057 -0.0537 0.9930
vn 0.0714 -0.0351 0.9968
vn 0.0314 -0.0159 0.9994
vn 0.0010 -0.0010 1.0000
vn 0.0064 -0.0043 1.0000
vn 0.0109 -0.0066 0.9999
vn 0.0318 -0.0162 0.9994
vn 0.0111 -0.0067 0.9999
vn -0.0654 0.0320 0.9974
vn -0.2096 0.0812 0.9744
vn -0.2524 0.0977 0.9627
vn -0.5445 0.2214 0.8090
vn 0.9176 -0.3828 0.1069
vn 0.9297 -0.3481 0.1202
vn 0.5987 -0.1721 0.7823
vn 0.8421 -0.3085 0.4425
vn 0.8309 -0.1547 0.5344
vn 0.5533 0.0597 0.8308
vn 0.9198 -0.3638 0.1468
vn 0.9109 -0.3864 0.1450
vn 0.9707 -0.2176 0.1024
vn 0.9812 -0.1922 0.0147
vn 0.6227 -0.2406 0.7446
vn 0.8385 -0.3543 0.4140
vn 0.7571 -0.3033 0.5787
vn 0.5240 -0.1976 0.8285
vn 0.2566 -0.0790 0.9633
vn 0.3414 -0.1372 0.9299
vn 0.4204 -0.0796 0.9038
vn 0.1811 0.2291 0.9564
vn 0.0702 0.3619 0.9296
vn 0.1652 0.0910 0.9820
vn 0.8899 -0.3749 0.2599
vn 0.8883 -0.3271 0.3225
vn 0.9105 -0.3928 0.1296
vn 0.7085 -0.2731 0.6507
vn 0.8872 -0.1158 0.4466
vn 0.8415 0.5400 0.0147
vn 0.2135 0.9768 0.0171
vn 0.1954 0.9691 0.1505
vn 0.8204 0.5603 0.1139
vn 0.0205 0.9365 0.3501
vn 0.0000 0.9377 0.3475
vn 0.0101 0.7331 0.6801
vn 0.0626 0.6895 0.7215
vn 0.0000 0.9998 0.0187
vn 0.0000 0.9890 0.1476
vn 0.0087 0.9877 0.1558
vn 0.4150 0.7222 0.5534
vn 0.3798 0.5583 0.7376
vn 0.7515 0.4815 0.4510
vn 0.1377 -0.0602 0.9886
vn 0.0687 -0.0104 0.9976
vn 0.0062 0.0222 0.9997
vn 0.0195 -0.0090 0.9998
vn 0.0248 0.1617 0.9865
vn 0.0043 0.4143 0.9101
vn 0.0000 0.4180 0.9084
vn 0.0010 0.1781 0.9840
vn 0.0000 0.0264 0.9997
vn 0.0000 0.1791 0.9838
vn 0.0000 0.7431 0.6692
vn -0.0371 0.0385 0.9986
vn -0.2049 0.0886 0.9748
vn -0.0527 0.1828 0.9817
vn -0.0433 0.4020 0.9146
vn -0.1889 0.3342 0.9234
vn -0.2396 0.1856 0.9530
vn -0.6689 0.2598 0.6965
vn -0.8500 0.3279 0.4122
vn -0.8369 0.3553 0.4163
vn -0.6118 0.2368 0.7548
vn -0.7388 0.3174 0.5945
vn -0.4982 0.2071 0.8420
vn -0.3338 0.1325 0.9333
vn -0.9225 0.3607 0.1371
vn -0.9286 0.3706 0.0178
vn -0.9283 0.3713 0.0186
vn -0.9108 0.3909 0.1328
vn -0.5885 0.3114 0.7461
vn -0.8424 0.3860 0.3758
vn -0.8219 0.3374 0.4590
vn -0.5602 0.2432 0.7919
vn -0.9277 0.3714 0.0372
vn -0.9283 0.3716 0.0103
vn -0.9306 0.3657 0.0138
vn -0.9279 0.3512 0.1255
vn -0.8901 0.4555 0.0147
vn -0.8866 0.4430 0.1326
vn -0.8960 0.3776 0.2335
vn -0.8936 0.3309 0.3032
vn -0.0023 0.9368 0.3498
vn -0.1201 0.9390 0.3222
vn -0.1149 0.7004 0.7044
vn -0.0176 0.7313 0.6818
vn -0.1849 0.9826 0.0170
vn -0.1681 0.9766 0.1345
vn -0.0003 0.9890 0.1479
vn -0.5958 0.7348 0.3243
vn -0.4679 0.6036 0.6456
vn -0.6419 0.7666 0.0175
vn -0.6346 0.7623 0.1273
vn -0.7643 0.3234 0.5579
vn -0.6689 0.2597 0.6965
vn -0.4992 0.2060 0.8416
vn -0.9283 0.3713 0.0187
vn -0.7643 0.3235 0.5579
vn -0.6118 0.2367 0.7548
vn -0.8369 0.3553 0.4162
vn -0.8219 0.3374 0.4589
vn -0.8936 0.3309 0.3031
vn -0.9186 0.3778 0.1164
vn -0.9280 0.3721 0.0178
vn -0.9273 0.3521 0.1273
vn 0.9177 0.3713 0.1410
vn 0.9159 0.4010 0.0176
vn 0.9275 0.3735 0.0155
vn 0.9266 0.3733 0.0450
vn -0.8620 0.3271 0.3873
vn -0.7037 0.2689 0.6576
vn -0.8923 0.3655 0.2649
vn -0.8961 0.3776 0.2334
vn -0.9261 0.3771 0.0139
vn -0.9133 0.3822 0.1411
vn -0.8529 0.3363 0.3993
vn -0.8960 0.3776 0.2334
vn -0.7037 0.2688 0.6576
vn -0.8620 0.3270 0.3873
vn 0.5701 0.2254 0.7900
vn 0.8187 0.3346 0.4667
vn 0.8488 0.3388 0.4059
vn 0.6551 0.2412 0.7160
vn 0.3656 0.1487 0.9188
vn 0.2813 0.1101 0.9533
vn 0.5339 0.2209 0.8162
vn 0.7591 0.3256 0.5637
vn 0.8341 0.3558 0.4216
vn 0.6043 0.2367 0.7608
vn 0.8592 0.3297 0.3913
vn 0.6970 0.2693 0.6646
vn 0.8897 0.3672 0.2713
vn 0.9255 0.3557 0.1300
vn 0.9276 0.3731 0.0186
vn 0.9276 0.3730 0.0186
vn 0.9171 0.3799 0.1209
vn 0.9103 0.3910 0.1360
vn 0.0848 0.0422 0.9955
vn 0.1582 0.0684 0.9850
vn 0.0260 0.0127 0.9996
vn 0.0088 0.0056 0.9999
vn 0.2424 0.0952 0.9655
vn 0.3255 0.1310 0.9364
vn 0.1236 0.0560 0.9908
vn 0.0606 0.0297 0.9977
vn 0.9123 0.3828 0.1453
vn 0.9264 0.3763 0.0172
vn 0.8932 0.3774 0.2444
vn 0.9210 0.3636 0.1397
vn 0.9277 0.3728 0.0184
vn 0.9291 0.3695 0.0163
vn 0.9267 0.3524 0.1303
vn 0.4911 0.2034 0.8470
vn 0.7332 0.3165 0.6019
vn 0.8194 0.3356 0.4647
vn 0.5722 0.2265 0.7882
vn 0.2833 0.1119 0.9525
vn 0.2024 0.0790 0.9761
vn 0.6566 0.2426 0.7142
vn 0.8497 0.3386 0.4042
vn 0.8597 0.3294 0.3903
vn 0.6985 0.2695 0.6629
vn 0.7603 0.3254 0.5622
vn 0.5366 0.2213 0.8143
vn 0.3685 0.1503 0.9174
vn 0.9124 0.3830 0.1443
vn 0.9261 0.3768 0.0165
vn 0.9276 0.3732 0.0184
vn 0.9258 0.3552 0.1293
vn 0.8475 0.3276 0.4176
vn 0.6634 0.2573 0.7027
vn 0.8924 0.3295 0.3084
vn 0.9275 0.3735 0.0143
vn 0.9267 0.3733 0.0432
vn 0.8938 0.3777 0.2417
vn 0.0005 0.0005 1.0000
vn -0.0014 -0.0014 1.0000
vn 0.0043 0.0033 1.0000
vn 0.0151 0.0075 0.9999
vn -0.0349 -0.0180 0.9992
vn -0.0125 -0.0071 0.9999
vn -0.1132 -0.0552 0.9920
vn -0.1922 -0.0773 0.9783
vn -0.0028 -0.0026 1.0000
vn -0.0001 -0.0001 1.0000
vn -0.0220 -0.0103 0.9997
vn -0.0526 -0.0258 0.9983
vn 0.0388 0.0197 0.9991
vn 0.0863 0.0431 0.9953
vn 0.0091 0.0057 0.9999
vn 0.0017 0.0017 1.0000
vn 0.1606 0.0694 0.9846
vn 0.2450 0.0960 0.9648
vn 0.0619 0.0303 0.9976
vn 0.0267 0.0131 0.9996
vn -0.0012 -0.0012 1.0000
vn -0.0072 -0.0048 1.0000
vn 0.0006 0.0006 1.0000
vn 0.0046 0.0034 1.0000
vn 0.6063 0.2370 0.7591
vn 0.8347 0.3560 0.4202
vn 0.8481 0.3281 0.4160
vn 0.6649 0.2583 0.7009
vn 0.9102 0.3914 0.1352
vn 0.9278 0.3727 0.0182
vn 0.9213 0.3633 0.1390
vn 0.9173 0.3798 0.1197
vn 0.9269 0.3526 0.1289
vn 0.9293 0.3689 0.0155
vn 0.9276 0.3735 0.0131
vn 0.9268 0.3733 0.0414
vn 0.8902 0.3672 0.2696
vn 0.8926 0.3305 0.3068
vn 0.3278 0.1315 0.9356
vn 0.4935 0.2043 0.8454
vn 0.2044 0.0797 0.9756
vn 0.1254 0.0565 0.9905
vn 0.5742 0.2275 0.7865
vn 0.8200 0.3366 0.4628
vn 0.8506 0.3383 0.4026
vn 0.6580 0.2437 0.7125
vn 0.3714 0.1516 0.9160
vn 0.2857 0.1134 0.9516
vn 0.0156 0.0076 0.9998
vn 0.0398 0.0201 0.9990
vn 0.0881 0.0439 0.9951
vn 0.1630 0.0702 0.9841
vn 0.0273 0.0134 0.9995
vn 0.0093 0.0058 0.9999
vn 0.7348 0.3171 0.5996
vn 0.8944 0.3781 0.2390
vn 0.9125 0.3832 0.1433
vn 0.5392 0.2217 0.8125
vn 0.7616 0.3252 0.5606
vn 0.8353 0.3563 0.4187
vn 0.6082 0.2373 0.7575
vn 0.8603 0.3291 0.3893
vn 0.7001 0.2696 0.6612
vn 0.8907 0.3672 0.2680
vn 0.9261 0.3547 0.1286
vn 0.9275 0.3734 0.0182
vn 0.9175 0.3796 0.1185
vn 0.9102 0.3918 0.1343
vn 0.9215 0.3629 0.1382
vn 0.9279 0.3725 0.0180
vn 0.9296 0.3683 0.0147
vn 0.9270 0.3527 0.1274
vn 0.2475 0.0968 0.9640
vn 0.3300 0.1321 0.9347
vn 0.1272 0.0570 0.9902
vn 0.0632 0.0310 0.9975
vn 0.4957 0.2054 0.8438
vn 0.7363 0.3177 0.5974
vn 0.8206 0.3376 0.4611
vn 0.5760 0.2285 0.7849
vn 0.2882 0.1148 0.9507
vn 0.2066 0.0805 0.9751
vn 0.8487 0.3286 0.4145
vn 0.6663 0.2593 0.6992
vn 0.8927 0.3314 0.3052
vn 0.8949 0.3786 0.2365
vn 0.9259 0.3774 0.0157
vn 0.8839 0.3391 0.3221
vn 0.6595 0.2446 0.7108
vn 0.8514 0.3380 0.4010
vn 0.8609 0.3288 0.3883
vn 0.7017 0.2698 0.6594
vn 0.7628 0.3250 0.5590
vn 0.5417 0.2223 0.8107
vn 0.3744 0.1527 0.9146
vn 0.9125 0.3835 0.1423
vn 0.9257 0.3780 0.0149
vn 0.9274 0.3736 0.0180
vn 0.9264 0.3541 0.1279
vn 0.5992 0.2495 0.7607
vn 0.8359 0.3566 0.4173
vn 0.8094 0.3983 0.4315
vn 0.6359 0.2778 0.7201
vn 0.9102 0.3922 0.1334
vn 0.9126 0.4085 0.0171
vn 0.9101 0.3924 0.1330
vn 0.9177 0.3795 0.1173
vn 0.9276 0.3734 0.0119
vn 0.9269 0.3732 0.0395
vn 0.8912 0.3671 0.2663
vn 0.6926 0.7211 0.0161
vn 0.6813 0.7195 0.1351
vn 0.6617 0.6840 0.3071
vn -0.5916 -0.2360 0.7709
vn -0.8294 -0.3558 0.4306
vn -0.8446 -0.3257 0.4249
vn -0.6527 -0.2532 0.7140
vn -0.4708 -0.1925 0.8610
vn -0.7216 -0.2991 0.6244
vn -0.3115 -0.1296 0.9414
vn -0.9095 -0.3909 0.1412
vn -0.9267 -0.3753 0.0187
vn -0.9192 -0.3667 0.1437
vn -0.2278 -0.0900 0.9695
vn -0.1448 -0.0633 0.9874
vn -0.3491 -0.1415 0.9263
vn -0.5179 -0.2174 0.8273
vn -0.6355 -0.2434 0.7328
vn -0.8442 -0.3543 0.4022
vn -0.8545 -0.3329 0.3987
vn -0.6838 -0.2687 0.6784
vn -0.9096 -0.3952 0.1283
vn -0.9227 -0.3621 0.1321
vn -0.9168 -0.3853 0.1045
vn -0.9151 -0.3825 0.1279
vn -0.7500 -0.3258 0.5756
vn -0.8902 -0.3788 0.2532
vn -0.8858 -0.3692 0.2810
vn -0.0755 -0.0373 0.9964
vn -0.0333 -0.0172 0.9993
vn -0.1881 -0.0763 0.9792
vn -0.2678 -0.1008 0.9582
vn -0.0116 -0.0070 0.9999
vn -0.0023 -0.0023 1.0000
vn -0.0496 -0.0244 0.9985
vn -0.1092 -0.0547 0.9925
vn -0.4426 -0.1927 0.8758
vn -0.6683 -0.3173 0.6728
vn -0.7479 -0.3397 0.5703
vn -0.5420 -0.2131 0.8129
vn -0.5328 -0.2814 0.7981
vn -0.5218 -0.5573 0.6458
vn -0.8499 -0.4035 0.3390
vn -0.4653 -0.8643 0.1910
vn -0.4391 -0.8981 0.0250
vn -0.8654 -0.5007 0.0193
vn -0.8798 -0.4578 0.1279
vn -0.2839 -0.1433 0.9481
vn -0.1791 -0.0969 0.9790
vn -0.0791 -0.1836 0.9798
vn -0.2207 -0.3374 0.9151
vn -0.1174 -0.5842 0.8031
vn 0.9157 -0.3797 0.1313
vn 0.9229 -0.3611 0.1340
vn 0.6263 -0.2410 0.7414
vn 0.8403 -0.3538 0.4107
vn 0.7610 -0.3069 0.5715
vn 0.5313 -0.2067 0.8216
vn 0.8902 -0.3754 0.2580
vn 0.8885 -0.3284 0.3206
vn 0.9177 -0.3829 0.1062
vn 0.9297 -0.3483 0.1194
vn 0.9105 -0.3928 0.1292
vn 0.5852 -0.2327 0.7768
vn 0.8283 -0.3523 0.4356
vn 0.7463 -0.3216 0.5827
vn 0.5114 -0.2123 0.8327
vn 0.2212 -0.0861 0.9714
vn 0.3038 -0.1272 0.9442
vn 0.3435 -0.1381 0.9290
vn 0.2631 -0.0971 0.9599
vn 0.0720 -0.0354 0.9968
vn 0.1396 -0.0608 0.9883
vn 0.6780 -0.2649 0.6856
vn 0.8532 -0.3308 0.4034
vn 0.8856 -0.3663 0.2856
vn 0.9108 -0.3871 0.1438
vn 0.6458 -0.2466 0.7226
vn 0.8443 -0.3174 0.4319
vn 0.5133 -0.5643 0.6466
vn 0.5837 -0.2323 0.7780
vn 0.4565 -0.1823 0.8709
vn 0.7122 -0.2788 0.6443
vn 0.3023 -0.1268 0.9448
vn 0.9199 -0.3640 0.1462
vn 0.5617 -0.8269 0.0265
vn 0.5390 -0.8168 0.2059
vn 0.3521 -0.2843 0.8917
vn 0.1728 -0.1527 0.9731
vn 0.1384 -0.0605 0.9885
vn 0.2197 -0.0855 0.9718
vn 0.1845 -0.0744 0.9800
vn 0.1063 -0.0538 0.9929
vn 0.0110 -0.0067 0.9999
vn 0.0317 -0.0161 0.9994
vn 0.0477 -0.0234 0.9986
vn 0.0197 -0.0091 0.9998
vn 0.3172 -0.4844 0.8153
vn -0.0066 -0.0045 1.0000
vn -0.0205 -0.0094 0.9997
vn -0.0011 -0.0011 1.0000
vn -0.0932 -0.0582 0.9939
vn -0.0369 -0.0263 0.9990
vn -0.0247 -0.0530 0.9983
vn -0.0518 -0.1168 0.9918
vn -0.0119 -0.0098 0.9999
vn -0.0021 -0.0021 1.0000
vn -0.0021 -0.0064 1.0000
vn -0.0098 -0.0230 0.9997
vn 0.0048 0.0036 1.0000
vn 0.0162 0.0078 0.9998
vn 0.0409 0.0206 0.9990
vn 0.0901 0.0446 0.9949
vn 0.0096 0.0059 0.9999
vn 0.0018 0.0018 1.0000
vn 0.0891 -0.0984 0.9912
vn 0.0359 -0.0461 0.9983
vn 0.0313 -0.0159 0.9994
vn 0.0712 -0.0349 0.9969
vn 0.0119 -0.0208 0.9997
vn 0.0021 -0.0064 1.0000
vn 0.0021 -0.0021 1.0000
vn 0.0063 -0.0043 1.0000
vn -0.0033 0.0028 1.0000
vn -0.0002 0.0002 1.0000
vn -0.0004 0.0004 1.0000
vn -0.0015 0.0015 1.0000
vn -0.0362 0.0186 0.9992
vn -0.0134 0.0072 0.9999
vn -0.0082 0.0053 1.0000
vn -0.0246 0.0119 0.9996
vn -0.1524 0.0665 0.9861
vn -0.0810 0.0401 0.9959
vn 0.1073 -0.0541 0.9928
vn 0.0484 -0.0237 0.9985
vn -0.0023 0.0023 1.0000
vn -0.0012 0.0012 1.0000
vn -0.0334 0.0173 0.9993
vn -0.0116 0.0070 0.9999
vn -0.0125 0.0071 0.9999
vn -0.0028 0.0026 1.0000
vn -0.0072 0.0048 1.0000
vn -0.0221 0.0103 0.9997
vn -0.1450 0.0633 0.9874
vn -0.0758 0.0374 0.9964
vn -0.0526 0.0258 0.9983
vn -0.1132 0.0551 0.9920
vn -0.3116 0.1295 0.9414
vn -0.2279 0.0899 0.9695
vn -0.0208 0.0095 0.9997
vn -0.0501 0.0245 0.9984
vn -0.2240 0.0878 0.9706
vn -0.1415 0.0618 0.9880
vn -0.1098 0.0548 0.9924
vn -0.1886 0.0763 0.9791
vn -0.4644 0.1885 0.8653
vn -0.3073 0.1287 0.9429
vn -0.6798 0.2673 0.6830
vn -0.8533 0.3327 0.4016
vn -0.8234 0.3786 0.4227
vn -0.6291 0.2426 0.7385
vn -0.7475 0.3242 0.5797
vn -0.5139 0.2149 0.8305
vn -0.3454 0.1397 0.9280
vn -0.9224 0.3626 0.1333
vn -0.9269 0.3747 0.0186
vn -0.9270 0.3747 0.0186
vn -0.9097 0.3948 0.1289
vn -0.6495 0.2507 0.7179
vn -0.8442 0.3226 0.4281
vn -0.8285 0.3546 0.4334
vn -0.5879 0.2347 0.7741
vn -0.9192 0.3661 0.1449
vn -0.9098 0.3897 0.1426
vn -0.9150 0.3819 0.1299
vn -0.7172 0.2911 0.6331
vn -0.8853 0.3685 0.2837
vn -0.6363 0.2431 0.7321
vn -0.8448 0.3536 0.4015
vn -0.7702 0.3152 0.5545
vn -0.5431 0.2132 0.8121
vn -0.2682 0.1009 0.9581
vn -0.3495 0.1414 0.9262
vn -0.5918 0.2357 0.7709
vn -0.8297 0.3553 0.4305
vn -0.7503 0.3255 0.5754
vn -0.5183 0.2171 0.8272
vn -0.8548 0.3323 0.3985
vn -0.6843 0.2683 0.6781
vn -0.8861 0.3686 0.2808
vn -0.9153 0.3819 0.1278
vn -0.9230 0.3615 0.1320
vn -0.9098 0.3904 0.1411
vn -0.9171 0.3847 0.1042
vn -0.9292 0.3506 0.1172
vn -0.8905 0.3783 0.2526
vn -0.8883 0.3336 0.3155
vn -0.9099 0.3946 0.1282
vn -0.0013 0.0013 1.0000
vn -0.0077 0.0050 1.0000
vn -0.0783 0.0387 0.9962
vn -0.0348 0.0179 0.9992
vn -0.0233 0.0111 0.9997
vn -0.0552 0.0271 0.9981
vn -0.2319 0.0919 0.9684
vn -0.1485 0.0648 0.9868
vn -0.5516 0.2168 0.8054
vn -0.7767 0.3195 0.5429
vn -0.7216 0.2983 0.6248
vn -0.4707 0.1920 0.8612
vn -0.1921 0.0771 0.9783
vn -0.2719 0.1031 0.9568
vn -0.6888 0.2693 0.6731
vn -0.8564 0.3320 0.3954
vn -0.8483 0.3523 0.3952
vn -0.6433 0.2435 0.7259
vn -0.7531 0.3268 0.5710
vn -0.5226 0.2194 0.8238
vn -0.3536 0.1432 0.9244
vn -0.9236 0.3603 0.1308
vn -0.9101 0.3944 0.1275
vn -0.1166 0.0555 0.9916
vn -0.1956 0.0779 0.9776
vn -0.4770 0.1954 0.8569
vn -0.3159 0.1303 0.9398
vn -0.6498 0.2445 0.7197
vn -0.8515 0.3512 0.3893
vn -0.7827 0.3235 0.5317
vn -0.5597 0.2206 0.7988
vn -0.2757 0.1059 0.9554
vn -0.3583 0.1455 0.9222
vn -0.6562 0.2547 0.7103
vn -0.8455 0.3275 0.4217
vn -0.8310 0.3560 0.4275
vn -0.5957 0.2367 0.7675
vn -0.9196 0.3661 0.1425
vn -0.9097 0.3910 0.1395
vn -0.9157 0.3818 0.1256
vn -0.9177 0.3843 0.1007
vn -0.9296 0.3506 0.1133
vn -0.7259 0.3050 0.6165
vn -0.8923 0.3797 0.2443
vn -0.8895 0.3375 0.3081
vn -0.9102 0.3942 0.1268
vn -0.8870 0.3687 0.2779
vn -0.9294 0.3506 0.1153
vn -0.9194 0.3661 0.1437
vn -0.9174 0.3845 0.1026
vn -0.8889 0.3356 0.3118
vn -0.8449 0.3251 0.4249
vn -0.8914 0.3790 0.2486
vn -0.6528 0.2527 0.7141
vn 0.1655 0.0710 0.9836
vn 0.2466 0.1018 0.9638
vn 0.0582 0.0457 0.9973
vn 0.0279 0.0138 0.9995
vn 0.2875 0.1941 0.9379
vn 0.3396 0.3948 0.8537
vn 0.0732 0.3937 0.9163
vn 0.0825 0.1847 0.9793
vn 0.0007 0.0007 1.0000
vn 0.0020 0.0271 0.9996
vn 0.0020 0.1784 0.9839
vn 0.0007 0.4174 0.9087
vn 0.2785 0.8550 0.4375
vn 0.0192 0.9365 0.3502
vn 0.0405 0.7300 0.6823
vn 0.1503 0.6976 0.7006
vn 0.2076 0.9781 0.0171
vn 0.0082 0.9878 0.1554
vn 0.1894 0.9705 0.1492
vn -0.0109 0.0305 0.9995
vn -0.0038 0.0031 1.0000
vn -0.0074 0.4135 0.9105
vn -0.0134 0.1777 0.9840
vn -0.0578 0.0284 0.9979
vn -0.1136 0.0690 0.9911
vn -0.3171 0.1346 0.9388
vn -0.2363 0.0938 0.9671
vn -0.4528 0.3864 0.8036
vn -0.7454 0.4695 0.4733
vn -0.7172 0.3268 0.6155
vn -0.4544 0.2361 0.8590
vn -0.1492 0.1808 0.9721
vn -0.1166 0.3681 0.9224
vn -0.0015 0.7416 0.6709
vn -0.0885 0.9445 0.3163
vn -0.4167 0.8276 0.3760
vn -0.3416 0.6826 0.6460
vn -0.0711 0.7324 0.6771
vn -0.1249 0.9919 0.0250
vn -0.3764 0.9260 0.0274
vn -0.4552 0.8766 0.1564
vn -0.1236 0.9823 0.1404
vn 0.5534 0.5346 0.6387
vn -0.7427 0.6112 0.2734
vn -0.5996 0.2374 0.7642
vn -0.8322 0.3566 0.4246
vn -0.7558 0.3275 0.5671
vn -0.5274 0.2211 0.8204
vn -0.8579 0.3314 0.3928
vn -0.6932 0.2698 0.6684
vn -0.8880 0.3688 0.2748
vn -0.9160 0.3817 0.1234
vn -0.9243 0.3591 0.1294
vn -0.9097 0.3918 0.1378
vn -0.9002 0.4130 0.1383
vn -0.9280 0.3722 0.0175
vn -0.9269 0.3748 0.0187
vn -0.9199 0.3659 0.1411
vn -0.6596 0.2566 0.7065
vn -0.8459 0.3280 0.4207
vn -0.8915 0.3293 0.3111
vn -0.7575 0.6502 0.0583
vn -0.7580 0.6519 0.0204
vn -0.8923 0.3655 0.2650
vn 0.9218 0.3596 0.1451
vn 0.9297 0.3679 0.0187
vn 0.9315 0.3439 0.1180
vn 0.4628 0.1832 0.8673
vn 0.7171 0.2810 0.6378
vn 0.7673 0.3065 0.5634
vn 0.5381 0.2069 0.8171
vn 0.2656 0.0973 0.9591
vn 0.1877 0.0743 0.9794
vn 0.6314 0.2383 0.7379
vn 0.8441 0.3491 0.4071
vn 0.8552 0.3264 0.4026
vn 0.6812 0.2618 0.6837
vn 0.7480 0.3185 0.5823
vn 0.5129 0.2103 0.8323
vn 0.3456 0.1373 0.9283
vn 0.9124 0.3883 0.1291
vn 0.9297 0.3679 0.0186
vn 0.9247 0.3564 0.1341
vn 0.8465 0.3154 0.4289
vn 0.6506 0.2458 0.7185
vn 0.8905 0.3257 0.3177
vn 0.9196 0.3785 0.1053
vn 0.8924 0.3718 0.2555
vn 0.5858 0.2300 0.7772
vn 0.8298 0.3485 0.4358
vn 0.8459 0.3129 0.4320
vn 0.6472 0.2436 0.7224
vn 0.9125 0.3828 0.1440
vn 0.9216 0.3596 0.1463
vn 0.9175 0.3754 0.1313
vn 0.9314 0.3439 0.1197
vn 0.9194 0.3787 0.1067
vn 0.8874 0.3621 0.2855
vn 0.8900 0.3234 0.3215
vn 0.8916 0.3712 0.2593
vn 0.0326 0.0165 0.9993
vn 0.0734 0.0357 0.9967
vn 0.0067 0.0045 1.0000
vn 0.0011 0.0011 1.0000
vn 0.1409 0.0605 0.9882
vn 0.2217 0.0851 0.9714
vn 0.0484 0.0234 0.9986
vn 0.0203 0.0092 0.9998
vn -0.0146 -0.0074 0.9999
vn 0.0022 0.0022 1.0000
vn 0.3034 0.1258 0.9445
vn 0.4563 0.1792 0.8716
vn 0.1843 0.0732 0.9801
vn 0.1067 0.0535 0.9928
vn 0.5291 0.2030 0.8239
vn 0.7599 0.3016 0.5758
vn 0.8403 0.3505 0.4135
vn 0.6241 0.2379 0.7443
vn 0.3414 0.1356 0.9301
vn 0.2620 0.0950 0.9604
vn 0.0110 0.0066 0.9999
vn 0.0314 0.0157 0.9994
vn 0.0010 0.0010 1.0000
vn 0.0708 0.0344 0.9969
vn 0.1372 0.0594 0.9888
vn 0.0192 0.0088 0.9998
vn 0.0062 0.0042 1.0000
vn 0.7127 0.2730 0.6461
vn 0.9122 0.3886 0.1297
vn 0.5083 0.2081 0.8356
vn 0.7451 0.3172 0.5867
vn 0.8293 0.3457 0.4391
vn 0.5859 0.2295 0.7772
vn 0.8536 0.3267 0.4057
vn 0.6766 0.2607 0.6886
vn 0.8866 0.3619 0.2882
vn 0.9241 0.3575 0.1352
vn 0.9173 0.3753 0.1333
vn 0.9141 0.3795 0.1429
vn 0.6669 0.2451 0.7037
vn 0.8666 0.3210 0.3819
vn 0.8658 0.3219 0.3831
vn 0.7093 0.2670 0.6524
vn 0.9209 0.3620 0.1447
vn 0.9303 0.3446 0.1254
vn 0.2174 0.0834 0.9725
vn 0.2996 0.1192 0.9466
vn 0.0982 0.0471 0.9941
vn 0.0462 0.0224 0.9987
vn 0.3869 0.1551 0.9090
vn 0.5521 0.2204 0.8041
vn 0.2590 0.0987 0.9608
vn 0.1751 0.0729 0.9818
vn 0.7683 0.3202 0.5543
vn 0.6168 0.2353 0.7511
vn 0.8395 0.3531 0.4130
vn 0.8522 0.3267 0.4087
vn 0.6725 0.2593 0.6931
vn 0.7422 0.3160 0.5910
vn 0.5037 0.2060 0.8389
vn 0.3390 0.1326 0.9314
vn 0.9121 0.3886 0.1307
vn 0.9235 0.3584 0.1364
vn 0.5821 0.2276 0.7806
vn 0.8282 0.3446 0.4419
vn 0.8660 0.3206 0.3838
vn 0.6638 0.2431 0.7073
vn 0.9143 0.3785 0.1440
vn 0.9208 0.3619 0.1452
vn 0.9170 0.3753 0.1352
vn 0.9205 0.3741 0.1133
vn 0.8858 0.3617 0.2909
vn 0.8949 0.3621 0.2607
vn -0.1215 -0.0559 0.9910
vn -0.0590 -0.0289 0.9978
vn -0.2391 -0.0943 0.9664
vn -0.3225 -0.1308 0.9375
vn -0.0252 -0.0122 0.9996
vn -0.0085 -0.0054 0.9999
vn -0.0829 -0.0411 0.9957
vn -0.1551 -0.0673 0.9856
vn -0.5304 -0.2207 0.8185
vn -0.7574 -0.3262 0.5656
vn -0.8332 -0.3558 0.4233
vn -0.6017 -0.2368 0.7628
vn -0.6949 -0.2693 0.6668
vn -0.8583 -0.3304 0.3926
vn -0.8889 -0.3676 0.2733
vn -0.9250 -0.3566 0.1308
vn -0.9275 -0.3732 0.0188
vn -0.9167 -0.3804 0.1223
vn -0.9102 -0.3909 0.1371
vn -0.5672 -0.2240 0.7926
vn -0.8176 -0.3334 0.4694
vn -0.8474 -0.3395 0.4082
vn -0.6530 -0.2397 0.7184
vn -0.3618 -0.1468 0.9206
vn -0.2785 -0.1078 0.9544
vn -0.9121 -0.3829 0.1467
vn -0.9265 -0.3759 0.0182
vn -0.8922 -0.3773 0.2481
vn -0.0140 -0.0073 0.9999
vn -0.0371 -0.0189 0.9991
vn -0.0037 -0.0030 1.0000
vn -0.1982 -0.0781 0.9770
vn -0.1194 -0.0557 0.9913
vn -0.3196 -0.1305 0.9385
vn -0.4848 -0.2018 0.8510
vn -0.0574 -0.0281 0.9980
vn -0.0245 -0.0117 0.9996
vn -0.1522 -0.0661 0.9861
vn -0.2359 -0.0933 0.9673
vn -0.9263 -0.3523 0.1338
vn -0.9284 -0.3713 0.0180
vn -0.9273 -0.3739 0.0170
vn -0.9264 -0.3736 0.0472
vn -0.5993 -0.2366 0.7648
vn -0.8324 -0.3555 0.4251
vn -0.8460 -0.3266 0.4215
vn -0.6591 -0.2553 0.7074
vn -0.9102 -0.3904 0.1381
vn -0.9274 -0.3736 0.0188
vn -0.9202 -0.3649 0.1414
vn -0.9165 -0.3805 0.1237
vn -0.6503 -0.2436 0.7196
vn -0.8521 -0.3501 0.3892
vn -0.8582 -0.3302 0.3929
vn -0.6935 -0.2688 0.6685
vn -0.5272 -0.2203 0.8207
vn -0.7559 -0.3265 0.5675
vn -0.3582 -0.1449 0.9223
vn -0.9108 -0.3930 0.1268
vn -0.9247 -0.3579 0.1296
vn -0.9182 -0.3831 0.1006
vn -0.8884 -0.3676 0.2752
vn -0.8928 -0.3786 0.2441
vn -0.8919 -0.3274 0.3121
vn -0.7285 -0.3156 0.6081
vn 0.0021 0.0021 1.0000
vn 0.0105 0.0064 0.9999
vn 0.0301 0.0149 0.9994
vn 0.0682 0.0332 0.9971
vn 0.0057 0.0040 1.0000
vn 0.0009 0.0009 1.0000
vn -0.0082 -0.0053 1.0000
vn -0.0363 -0.0185 0.9992
vn -0.0810 -0.0400 0.9959
vn -0.0135 -0.0072 0.9999
vn 0.1336 0.0583 0.9893
vn 0.2132 0.0817 0.9736
vn 0.0439 0.0215 0.9988
vn 0.0180 0.0083 0.9998
vn 0.2945 0.1164 0.9485
vn 0.3807 0.1527 0.9120
vn 0.1701 0.0713 0.9828
vn 0.0944 0.0457 0.9945
vn 0.0100 0.0062 0.9999
vn 0.0288 0.0141 0.9995
vn -0.4779 -0.1950 0.8565
vn -0.7267 -0.3044 0.6158
vn -0.7834 -0.3226 0.5312
vn -0.5604 -0.2200 0.7985
vn -0.2759 -0.1056 0.9554
vn -0.1961 -0.0776 0.9775
vn -0.1173 -0.0554 0.9915
vn -0.0558 -0.0273 0.9981
vn -0.2331 -0.0921 0.9681
vn -0.3169 -0.1301 0.9395
vn -0.9202 -0.3648 0.1423
vn -0.9302 -0.3493 0.1131
vn -0.5242 -0.2193 0.8229
vn -0.7542 -0.3262 0.5698
vn -0.8317 -0.3551 0.4269
vn -0.5969 -0.2362 0.7668
vn -0.6908 -0.2686 0.6713
vn -0.8573 -0.3307 0.3945
vn -0.8878 -0.3675 0.2771
vn -0.9243 -0.3587 0.1304
vn -0.9163 -0.3805 0.1251
vn -0.9102 -0.3900 0.1391
vn -0.6571 -0.2541 0.7097
vn -0.8461 -0.3265 0.4213
vn -0.8900 -0.3364 0.3078
vn -0.0237 -0.0112 0.9997
vn -0.0079 -0.0051 1.0000
vn -0.0793 -0.0391 0.9961
vn -0.1497 -0.0651 0.9866
vn -0.0130 -0.0072 0.9999
vn -0.0354 -0.0181 0.9992
vn -0.5555 -0.2176 0.8025
vn -0.7798 -0.3201 0.5380
vn -0.8502 -0.3507 0.3927
vn -0.6463 -0.2429 0.7234
vn -0.3553 -0.1434 0.9237
vn -0.2735 -0.1038 0.9562
vn -0.1939 -0.0772 0.9780
vn -0.1152 -0.0552 0.9918
vn -0.3142 -0.1296 0.9405
vn -0.4740 -0.1929 0.8591
vn -0.7240 -0.3004 0.6209
vn -0.9107 -0.3931 0.1273
vn 0.9296 0.3460 0.1270
vn 0.9200 0.3744 0.1159
vn 0.8647 0.3225 0.3851
vn 0.8938 0.3623 0.2642
vn 0.5467 0.2196 0.8080
vn 0.7659 0.3206 0.5574
vn 0.8382 0.3526 0.4160
vn 0.6129 0.2346 0.7545
vn 0.3313 0.1349 0.9338
vn 0.2538 0.0971 0.9624
vn 0.4696 0.2343 0.8512
vn 0.7295 0.3229 0.6030
vn 0.7576 0.4616 0.4614
vn 0.4682 0.3778 0.7988
vn 0.8510 0.3249 0.4125
vn 0.6697 0.2573 0.6967
vn 0.8948 0.3271 0.3039
vn 0.9237 0.3577 0.1373
vn 0.9299 0.3673 0.0180
vn 0.9317 0.3628 0.0144
vn 0.9037 0.4073 0.1319
vn 0.0657 0.0319 0.9973
vn 0.1235 0.0703 0.9898
vn 0.0135 0.0311 0.9994
vn 0.0052 0.0037 1.0000
vn 0.1585 0.1794 0.9709
vn 0.1225 0.3640 0.9233
vn 0.0095 0.4124 0.9109
vn 0.0166 0.1777 0.9840
vn 0.9122 0.3878 0.1326
vn 0.7617 0.5951 0.2563
vn 0.7685 0.6397 0.0120
vn 0.4053 0.9140 0.0182
vn 0.4814 0.8647 0.1431
vn 0.7693 0.6373 0.0459
vn 0.0940 0.9449 0.3135
vn 0.0021 0.7410 0.6715
vn 0.0736 0.7304 0.6790
vn 0.1458 0.9891 0.0214
vn 0.1369 0.9814 0.1349
vn 0.4404 0.8206 0.3642
vn 0.3543 0.6764 0.6457
vn -0.0002 0.0263 0.9997
vn -0.0031 -0.0027 1.0000
vn -0.0542 -0.0265 0.9982
vn -0.0229 0.0157 0.9996
vn -0.1445 -0.0411 0.9887
vn -0.2306 -0.0909 0.9688
vn -0.0076 0.1743 0.9847
vn -0.0013 0.4169 0.9089
vn -0.0168 0.4030 0.9151
vn -0.0659 0.1362 0.9885
vn -0.0013 0.7418 0.6706
vn 0.7059 0.2666 0.6562
vn -0.9300 -0.3493 0.1143
vn -0.9180 -0.3832 0.1018
vn -0.5945 -0.2355 0.7689
vn -0.8309 -0.3547 0.4287
vn -0.8457 -0.3251 0.4233
vn -0.6550 -0.2529 0.7120
vn -0.9103 -0.3896 0.1401
vn -0.9200 -0.3648 0.1431
vn -0.9161 -0.3806 0.1264
vn -0.8897 -0.3352 0.3101
vn -0.8923 -0.3781 0.2467
vn -0.8872 -0.3675 0.2789
vn -0.6397 -0.2396 0.7303
vn -0.8481 -0.3515 0.3965
vn -0.8564 -0.3309 0.3964
vn -0.6880 -0.2680 0.6744
vn -0.5215 -0.2179 0.8250
vn -0.7525 -0.3254 0.5725
vn -0.3466 -0.1296 0.9290
vn -0.9105 -0.3932 0.1277
vn -0.9239 -0.3594 0.1312
vn -0.3454 0.0543 0.9369
vn -0.6934 -0.2555 0.6737
vn -0.7708 -0.3020 0.5609
vn -0.5192 -0.1295 0.8448
vn -0.2353 0.0433 0.9709
vn -0.1153 0.3161 0.9417
vn -0.9767 -0.1602 0.1425
vn -0.9879 -0.1540 0.0166
vn -0.9298 -0.3494 0.1156
vn -0.9179 -0.3834 0.1028
vn -0.6037 -0.0331 0.7965
vn -0.8857 -0.1851 0.4257
vn -0.8893 -0.3340 0.3124
vn -0.8917 -0.3777 0.2493
vn -0.0593 0.9419 0.3307
vn -0.0871 0.6451 0.7591
vn -0.0303 0.7103 0.7032
vn -0.0906 0.9957 0.0173
vn -0.0813 0.9870 0.1384
vn -0.7015 0.5954 0.3917
vn -0.4779 0.4752 0.7388
vn -0.7433 0.6687 0.0187
vn -0.7441 0.6464 0.1689
vn -0.8537 0.5203 0.0209
vn -0.8395 0.5314 0.1138
vn -0.8002 0.5197 0.2994
vn 0.9298 -0.3481 -0.1198
vn 0.9199 -0.3638 -0.1466
vn 0.9157 -0.3795 -0.1324
vn 0.9226 -0.3614 -0.1348
vn 0.9108 -0.3866 -0.1446
vn 0.8277 -0.3517 -0.4372
vn 0.5829 -0.2320 -0.7787
vn 0.5090 -0.2111 -0.8345
vn 0.7449 -0.3208 -0.5850
vn 0.8524 -0.3307 -0.4050
vn 0.6758 -0.2642 -0.6881
vn 0.8852 -0.3660 -0.2872
vn 0.8442 -0.3166 -0.4326
vn 0.6451 -0.2459 -0.7234
vn 0.8884 -0.3277 -0.3215
vn 0.9177 -0.3827 -0.1066
vn 0.8901 -0.3751 -0.2589
vn 0.9299 -0.3482 -0.1189
vn 0.9200 -0.3638 -0.1459
vn 0.9178 -0.3826 -0.1058
vn 0.8887 -0.3290 -0.3194
vn 0.8445 -0.3180 -0.4309
vn 0.8906 -0.3754 -0.2568
vn 0.9178 -0.3827 -0.1062
vn 0.9298 -0.3481 -0.1193
vn 0.9158 -0.3795 -0.1313
vn 0.9229 -0.3608 -0.1341
vn 0.9108 -0.3869 -0.1438
vn 0.8284 -0.3521 -0.4356
vn 0.5852 -0.2325 -0.7768
vn 0.5115 -0.2123 -0.8327
vn 0.7464 -0.3215 -0.5826
vn 0.8533 -0.3305 -0.4033
vn 0.6782 -0.2648 -0.6855
vn 0.8857 -0.3661 -0.2857
vn 0.8406 -0.3535 -0.4105
vn 0.6267 -0.2408 -0.7411
vn 0.5318 -0.2068 -0.8213
vn 0.7615 -0.3070 -0.5709
vn 0.3436 -0.1381 -0.9289
vn 0.2633 -0.0971 -0.9598
vn 0.9106 -0.3926 -0.1293
vn 0.8886 -0.3283 -0.3204
vn 0.8903 -0.3753 -0.2579
vn 0.9231 -0.3605 -0.1338
vn 0.9106 -0.3925 -0.1291
vn 0.8537 -0.3304 -0.4025
vn 0.6795 -0.2651 -0.6841
vn 0.6287 -0.2409 -0.7394
vn 0.8416 -0.3531 -0.4087
vn 0.7472 -0.3219 -0.5814
vn 0.5127 -0.2128 -0.8317
vn 0.3447 -0.1385 -0.9284
vn 0.7635 -0.3084 -0.5675
vn 0.5342 -0.2079 -0.8194
vn 0.4586 -0.1835 -0.8695
vn 0.7137 -0.2813 -0.6415
vn 0.2643 -0.0977 -0.9595
vn 0.0491 -0.0240 -0.9985
vn 0.0204 -0.0093 -0.9997
vn 0.1407 -0.0612 -0.9882
vn 0.2224 -0.0865 -0.9711
vn 0.0321 -0.0164 -0.9994
vn 0.0728 -0.0358 -0.9967
vn 0.1073 -0.0540 -0.9928
vn 0.0485 -0.0237 -0.9985
vn 0.2212 -0.0861 -0.9714
vn 0.3038 -0.1271 -0.9442
vn 0.0201 -0.0092 -0.9998
vn 0.0065 -0.0044 -1.0000
vn 0.0721 -0.0354 -0.9968
vn 0.1397 -0.0608 -0.9883
vn 0.0022 -0.0022 -1.0000
vn 0.0112 -0.0068 -0.9999
vn 0.6471 -0.2472 -0.7213
vn 0.9199 -0.3638 -0.1463
vn 0.9108 -0.3867 -0.1442
vn 0.9157 -0.3795 -0.1319
vn 0.8443 -0.3173 -0.4317
vn 0.6461 -0.2466 -0.7223
vn 0.5841 -0.2323 -0.7777
vn 0.8281 -0.3519 -0.4364
vn 0.9228 -0.3611 -0.1344
vn 0.9105 -0.3927 -0.1294
vn 0.8528 -0.3306 -0.4042
vn 0.6770 -0.2645 -0.6868
vn 0.6247 -0.2407 -0.7429
vn 0.8395 -0.3539 -0.4122
vn 0.7457 -0.3212 -0.5838
vn 0.5102 -0.2117 -0.8336
vn 0.3425 -0.1376 -0.9294
vn 0.1847 -0.0744 -0.9800
vn 0.1065 -0.0538 -0.9929
vn 0.3026 -0.1268 -0.9447
vn 0.4569 -0.1824 -0.8706
vn 0.0479 -0.0234 -0.9986
vn 0.0198 -0.0091 -0.9998
vn 0.1387 -0.0605 -0.9885
vn 0.2201 -0.0856 -0.9717
vn 0.7125 -0.2791 -0.6438
vn 0.8854 -0.3660 -0.2864
vn 0.7594 -0.3057 -0.5743
vn 0.5293 -0.2058 -0.8231
vn 0.4551 -0.1813 -0.8718
vn 0.7113 -0.2769 -0.6461
vn 0.2623 -0.0965 -0.9602
vn 0.1838 -0.0741 -0.9802
vn 0.1057 -0.0537 -0.9930
vn 0.0473 -0.0232 -0.9986
vn 0.2189 -0.0852 -0.9720
vn 0.3013 -0.1265 -0.9451
vn 0.0064 -0.0043 -1.0000
vn 0.0010 -0.0010 -1.0000
vn 0.0314 -0.0159 -0.9994
vn 0.0714 -0.0351 -0.9968
vn 0.0109 -0.0066 -0.9999
vn 0.0111 -0.0067 -0.9999
vn 0.0318 -0.0162 -0.9994
vn -0.0654 0.0320 -0.9974
vn -0.3777 0.1532 -0.9132
vn -0.5445 0.2214 -0.8090
vn -0.2523 0.0977 -0.9627
vn 0.9176 -0.3828 -0.1070
vn 0.9297 -0.3481 -0.1202
vn 0.9198 -0.3638 -0.1469
vn 0.9109 -0.3864 -0.1450
vn 0.9812 -0.1922 -0.0147
vn 0.9706 -0.2176 -0.1024
vn 0.8420 -0.3085 -0.4425
vn 0.5986 -0.1721 -0.7823
vn 0.5533 0.0596 -0.8309
vn 0.8309 -0.1547 -0.5345
vn 0.8385 -0.3543 -0.4140
vn 0.6226 -0.2406 -0.7446
vn 0.5240 -0.1976 -0.8285
vn 0.7570 -0.3033 -0.5787
vn 0.3413 -0.1372 -0.9299
vn 0.2565 -0.0790 -0.9633
vn 0.1652 0.0911 -0.9821
vn 0.0702 0.3619 -0.9296
vn 0.1811 0.2291 -0.9564
vn 0.4204 -0.0796 -0.9039
vn 0.9105 -0.3928 -0.1296
vn 0.8883 -0.3270 -0.3225
vn 0.8899 -0.3749 -0.2599
vn 0.7085 -0.2731 -0.6508
vn 0.8872 -0.1158 -0.4467
vn 0.8204 0.5603 -0.1139
vn 0.1953 0.9691 -0.1505
vn 0.2135 0.9768 -0.0171
vn 0.8415 0.5400 -0.0147
vn 0.0087 0.9877 -0.1559
vn 0.0000 0.9890 -0.1477
vn 0.0000 0.9998 -0.0187
vn 0.0626 0.6895 -0.7216
vn 0.0101 0.7330 -0.6801
vn 0.0000 0.9377 -0.3475
vn 0.0205 0.9365 -0.3502
vn 0.3797 0.5582 -0.7377
vn 0.4150 0.7222 -0.5534
vn 0.7515 0.4815 -0.4510
vn 0.0195 -0.0090 -0.9998
vn 0.0062 0.0222 -0.9997
vn 0.0687 -0.0104 -0.9976
vn 0.1377 -0.0602 -0.9886
vn 0.0010 0.1781 -0.9840
vn 0.0000 0.4180 -0.9085
vn 0.0043 0.4143 -0.9101
vn 0.0248 0.1617 -0.9865
vn 0.0000 0.0264 -0.9997
vn 0.0000 0.1791 -0.9838
vn 0.0000 0.7430 -0.6693
vn 0.0000 0.7430 -0.6692
vn -0.2049 0.0886 -0.9748
vn -0.0371 0.0385 -0.9986
vn -0.2395 0.1856 -0.9530
vn -0.1889 0.3342 -0.9234
vn -0.0433 0.4020 -0.9146
vn -0.0527 0.1828 -0.9817
vn -0.9286 0.3706 -0.0178
vn -0.9225 0.3607 -0.1372
vn -0.9108 0.3909 -0.1328
vn -0.9283 0.3713 -0.0187
vn -0.8500 0.3279 -0.4123
vn -0.6688 0.2597 -0.6966
vn -0.6117 0.2367 -0.7548
vn -0.8369 0.3553 -0.4164
vn -0.4981 0.2071 -0.8420
vn -0.7388 0.3174 -0.5945
vn -0.3338 0.1325 -0.9333
vn -0.9283 0.3716 -0.0103
vn -0.9277 0.3714 -0.0372
vn -0.9279 0.3512 -0.1256
vn -0.9306 0.3657 -0.0138
vn -0.8866 0.4430 -0.1327
vn -0.8901 0.4555 -0.0147
vn -0.8960 0.3776 -0.2335
vn -0.8424 0.3860 -0.3759
vn -0.5884 0.3114 -0.7462
vn -0.5601 0.2431 -0.7919
vn -0.8219 0.3373 -0.4591
vn -0.8936 0.3309 -0.3033
vn -0.0003 0.9890 -0.1479
vn -0.1681 0.9765 -0.1346
vn -0.1849 0.9826 -0.0170
vn -0.0176 0.7312 -0.6819
vn -0.1149 0.7004 -0.7045
vn -0.1201 0.9390 -0.3223
vn -0.0023 0.9368 -0.3499
vn -0.6346 0.7623 -0.1274
vn -0.6419 0.7666 -0.0175
vn -0.4678 0.6036 -0.6456
vn -0.5957 0.7348 -0.3244
vn -0.7642 0.3234 -0.5580
vn -0.6688 0.2598 -0.6966
vn -0.8369 0.3553 -0.4163
vn -0.4992 0.2060 -0.8416
vn -0.7643 0.3234 -0.5579
vn -0.7643 0.3235 -0.5579
vn -0.8219 0.3373 -0.4590
vn -0.8936 0.3309 -0.3032
vn -0.9186 0.3778 -0.1164
vn -0.9273 0.3521 -0.1274
vn -0.9280 0.3721 -0.0178
vn 0.9159 0.4010 -0.0176
vn 0.9177 0.3713 -0.1411
vn 0.9266 0.3733 -0.0450
vn 0.9275 0.3735 -0.0155
vn -0.7037 0.2689 -0.6577
vn -0.8620 0.3271 -0.3874
vn -0.8923 0.3655 -0.2650
vn -0.9133 0.3822 -0.1411
vn -0.9261 0.3771 -0.0139
vn -0.8620 0.3270 -0.3874
vn -0.7037 0.2688 -0.6577
vn -0.7643 0.3234 -0.5580
vn -0.8619 0.3270 -0.3874
vn -0.9273 0.3520 -0.1274
vn -0.9133 0.3822 -0.1412
vn -0.9284 0.3716 -0.0103
vn -0.8529 0.3363 -0.3994
vn 0.8187 0.3346 -0.4667
vn 0.5701 0.2253 -0.7901
vn 0.6550 0.2412 -0.7161
vn 0.8487 0.3388 -0.4060
vn 0.2812 0.1101 -0.9533
vn 0.3655 0.1487 -0.9188
vn 0.9276 0.3731 -0.0186
vn 0.9255 0.3557 -0.1301
vn 0.9171 0.3799 -0.1209
vn 0.9276 0.3730 -0.0187
vn 0.9103 0.3910 -0.1361
vn 0.7591 0.3256 -0.5638
vn 0.5339 0.2209 -0.8162
vn 0.6043 0.2367 -0.7608
vn 0.8340 0.3558 -0.4217
vn 0.6969 0.2692 -0.6647
vn 0.8591 0.3297 -0.3914
vn 0.8897 0.3672 -0.2713
vn 0.0088 0.0056 -0.9999
vn 0.0260 0.0127 -0.9996
vn 0.1582 0.0684 -0.9850
vn 0.0848 0.0422 -0.9955
vn 0.0606 0.0297 -0.9977
vn 0.1236 0.0560 -0.9908
vn 0.3254 0.1310 -0.9364
vn 0.2424 0.0951 -0.9655
vn 0.9264 0.3763 -0.0172
vn 0.9123 0.3828 -0.1454
vn 0.8932 0.3774 -0.2445
vn 0.9277 0.3728 -0.0184
vn 0.9210 0.3636 -0.1398
vn 0.9267 0.3524 -0.1304
vn 0.9291 0.3695 -0.0163
vn 0.7331 0.3165 -0.6019
vn 0.4911 0.2034 -0.8470
vn 0.5722 0.2265 -0.7882
vn 0.8194 0.3356 -0.4647
vn 0.2024 0.0790 -0.9761
vn 0.2833 0.1119 -0.9525
vn 0.9261 0.3769 -0.0165
vn 0.9124 0.3830 -0.1444
vn 0.9258 0.3552 -0.1294
vn 0.9276 0.3732 -0.0184
vn 0.8497 0.3386 -0.4043
vn 0.6565 0.2426 -0.7142
vn 0.6985 0.2694 -0.6630
vn 0.8597 0.3294 -0.3904
vn 0.5365 0.2213 -0.8143
vn 0.7603 0.3254 -0.5622
vn 0.3684 0.1503 -0.9174
vn 0.6633 0.2573 -0.7027
vn 0.8475 0.3275 -0.4176
vn 0.8924 0.3295 -0.3084
vn 0.9267 0.3733 -0.0432
vn 0.9275 0.3735 -0.0144
vn 0.8938 0.3777 -0.2418
vn -0.0014 -0.0014 -1.0000
vn 0.0005 0.0005 -1.0000
vn 0.0151 0.0075 -0.9999
vn 0.0043 0.0033 -1.0000
vn -0.1922 -0.0772 -0.9783
vn -0.1132 -0.0552 -0.9920
vn -0.0125 -0.0071 -0.9999
vn -0.0349 -0.0180 -0.9992
vn -0.0526 -0.0258 -0.9983
vn -0.0220 -0.0103 -0.9997
vn -0.0001 -0.0001 -1.0000
vn -0.0028 -0.0026 -1.0000
vn 0.0017 0.0017 -1.0000
vn 0.0091 0.0057 -0.9999
vn 0.0863 0.0431 -0.9953
vn 0.0388 0.0197 -0.9991
vn 0.0267 0.0131 -0.9996
vn 0.0619 0.0303 -0.9976
vn 0.2449 0.0959 -0.9648
vn 0.1606 0.0694 -0.9846
vn -0.0072 -0.0048 -1.0000
vn -0.0012 -0.0012 -1.0000
vn 0.0045 0.0034 -1.0000
vn 0.0006 0.0006 -1.0000
vn 0.9102 0.3914 -0.1352
vn 0.9213 0.3633 -0.1390
vn 0.9278 0.3727 -0.0182
vn 0.9173 0.3798 -0.1197
vn 0.8347 0.3560 -0.4202
vn 0.6062 0.2370 -0.7592
vn 0.6648 0.2583 -0.7009
vn 0.8481 0.3281 -0.4161
vn 0.9293 0.3689 -0.0156
vn 0.9269 0.3526 -0.1289
vn 0.9268 0.3733 -0.0414
vn 0.9276 0.3735 -0.0131
vn 0.8902 0.3672 -0.2697
vn 0.8925 0.3304 -0.3069
vn 0.1253 0.0565 -0.9905
vn 0.2044 0.0797 -0.9756
vn 0.4935 0.2043 -0.8454
vn 0.3277 0.1315 -0.9356
vn 0.8200 0.3366 -0.4629
vn 0.5741 0.2275 -0.7865
vn 0.6580 0.2437 -0.7125
vn 0.8505 0.3383 -0.4027
vn 0.2857 0.1134 -0.9516
vn 0.3714 0.1516 -0.9160
vn 0.0397 0.0201 -0.9990
vn 0.0156 0.0076 -0.9998
vn 0.0093 0.0058 -0.9999
vn 0.0273 0.0134 -0.9995
vn 0.1630 0.0702 -0.9841
vn 0.0881 0.0439 -0.9951
vn 0.7348 0.3171 -0.5996
vn 0.8943 0.3781 -0.2391
vn 0.9125 0.3832 -0.1433
vn 0.9275 0.3734 -0.0182
vn 0.9261 0.3547 -0.1287
vn 0.9175 0.3796 -0.1185
vn 0.9102 0.3918 -0.1343
vn 0.7615 0.3252 -0.5606
vn 0.5392 0.2217 -0.8125
vn 0.6081 0.2373 -0.7575
vn 0.8353 0.3563 -0.4188
vn 0.7001 0.2696 -0.6612
vn 0.8603 0.3291 -0.3893
vn 0.8907 0.3672 -0.2680
vn 0.9279 0.3725 -0.0181
vn 0.9215 0.3629 -0.1383
vn 0.9270 0.3527 -0.1274
vn 0.9296 0.3683 -0.0148
vn 0.0632 0.0310 -0.9975
vn 0.1271 0.0570 -0.9902
vn 0.3300 0.1321 -0.9347
vn 0.2475 0.0968 -0.9640
vn 0.7363 0.3177 -0.5975
vn 0.4957 0.2054 -0.8439
vn 0.5760 0.2284 -0.7849
vn 0.8206 0.3376 -0.4612
vn 0.2065 0.0805 -0.9751
vn 0.2882 0.1148 -0.9507
vn 0.6662 0.2593 -0.6992
vn 0.8486 0.3286 -0.4145
vn 0.8927 0.3314 -0.3053
vn 0.8948 0.3786 -0.2365
vn 0.9259 0.3774 -0.0157
vn 0.8839 0.3391 -0.3221
vn 0.9257 0.3780 -0.0149
vn 0.9125 0.3835 -0.1423
vn 0.9264 0.3541 -0.1279
vn 0.9274 0.3736 -0.0180
vn 0.8514 0.3380 -0.4011
vn 0.6595 0.2446 -0.7108
vn 0.7017 0.2698 -0.6594
vn 0.8609 0.3288 -0.3883
vn 0.5417 0.2222 -0.8107
vn 0.7628 0.3250 -0.5591
vn 0.3744 0.1527 -0.9146
vn 0.9276 0.3730 -0.0186
vn 0.9102 0.3922 -0.1334
vn 0.9101 0.3924 -0.1330
vn 0.9126 0.4085 -0.0171
vn 0.9177 0.3795 -0.1173
vn 0.8359 0.3566 -0.4173
vn 0.5992 0.2495 -0.7607
vn 0.6358 0.2778 -0.7201
vn 0.8094 0.3983 -0.4316
vn 0.9269 0.3732 -0.0396
vn 0.9276 0.3734 -0.0119
vn 0.8912 0.3671 -0.2663
vn 0.6813 0.7195 -0.1351
vn 0.6926 0.7211 -0.0161
vn 0.6617 0.6839 -0.3072
vn -0.9095 -0.3909 -0.1412
vn -0.9192 -0.3667 -0.1438
vn -0.8294 -0.3558 -0.4307
vn -0.5916 -0.2360 -0.7709
vn -0.6527 -0.2532 -0.7141
vn -0.8446 -0.3257 -0.4250
vn -0.7215 -0.2991 -0.6244
vn -0.4708 -0.1925 -0.8610
vn -0.3115 -0.1296 -0.9414
vn -0.5179 -0.2173 -0.8274
vn -0.3491 -0.1415 -0.9263
vn -0.1448 -0.0633 -0.9874
vn -0.2277 -0.0900 -0.9696
vn -0.9096 -0.3952 -0.1284
vn -0.9227 -0.3621 -0.1322
vn -0.9168 -0.3853 -0.1045
vn -0.8442 -0.3543 -0.4023
vn -0.6354 -0.2434 -0.7328
vn -0.6837 -0.2687 -0.6785
vn -0.8545 -0.3329 -0.3988
vn -0.9151 -0.3825 -0.1280
vn -0.7500 -0.3258 -0.5756
vn -0.8902 -0.3788 -0.2533
vn -0.8858 -0.3692 -0.2811
vn -0.2677 -0.1008 -0.9582
vn -0.1881 -0.0763 -0.9792
vn -0.0333 -0.0172 -0.9993
vn -0.0755 -0.0373 -0.9964
vn -0.1092 -0.0547 -0.9925
vn -0.0496 -0.0244 -0.9985
vn -0.0023 -0.0023 -1.0000
vn -0.0116 -0.0070 -0.9999
vn -0.4391 -0.8981 -0.0250
vn -0.4652 -0.8643 -0.1911
vn -0.8798 -0.4578 -0.1279
vn -0.8654 -0.5007 -0.0194
vn -0.6683 -0.3173 -0.6728
vn -0.4426 -0.1927 -0.8758
vn -0.5420 -0.2131 -0.8129
vn -0.7479 -0.3397 -0.5703
vn -0.5218 -0.5573 -0.6459
vn -0.5328 -0.2814 -0.7981
vn -0.8499 -0.4035 -0.3390
vn -0.2207 -0.3374 -0.9152
vn -0.0791 -0.1836 -0.9798
vn -0.1791 -0.0969 -0.9790
vn -0.2838 -0.1433 -0.9481
vn -0.1174 -0.5842 -0.8031
vn 0.9157 -0.3797 -0.1313
vn 0.9229 -0.3611 -0.1341
vn 0.9177 -0.3829 -0.1062
vn 0.9297 -0.3483 -0.1194
vn 0.9105 -0.3928 -0.1293
vn 0.8403 -0.3538 -0.4108
vn 0.6263 -0.2410 -0.7414
vn 0.5312 -0.2067 -0.8216
vn 0.7610 -0.3069 -0.5716
vn 0.8885 -0.3284 -0.3206
vn 0.8902 -0.3754 -0.2580
vn 0.8283 -0.3523 -0.4356
vn 0.5851 -0.2327 -0.7768
vn 0.5113 -0.2123 -0.8327
vn 0.7463 -0.3216 -0.5827
vn 0.2211 -0.0861 -0.9714
vn 0.1396 -0.0608 -0.9883
vn 0.0720 -0.0354 -0.9968
vn 0.2631 -0.0970 -0.9599
vn 0.3434 -0.1381 -0.9290
vn 0.9107 -0.3871 -0.1438
vn 0.8531 -0.3308 -0.4034
vn 0.6780 -0.2649 -0.6857
vn 0.8856 -0.3663 -0.2857
vn 0.9198 -0.3640 -0.1463
vn 0.5390 -0.8167 -0.2059
vn 0.5617 -0.8269 -0.0266
vn 0.8442 -0.3174 -0.4319
vn 0.6458 -0.2465 -0.7226
vn 0.5837 -0.2323 -0.7780
vn 0.5133 -0.5643 -0.6466
vn 0.7121 -0.2788 -0.6443
vn 0.4564 -0.1823 -0.8709
vn 0.3022 -0.1268 -0.9448
vn 0.2197 -0.0855 -0.9718
vn 0.1383 -0.0605 -0.9885
vn 0.1727 -0.1526 -0.9731
vn 0.3521 -0.2843 -0.8918
vn 0.0317 -0.0161 -0.9994
vn 0.0110 -0.0067 -0.9999
vn 0.1063 -0.0538 -0.9929
vn 0.1844 -0.0743 -0.9800
vn 0.0197 -0.0091 -0.9998
vn 0.0477 -0.0234 -0.9986
vn 0.3172 -0.4844 -0.8153
vn -0.0205 -0.0094 -0.9997
vn -0.0066 -0.0045 -1.0000
vn -0.0011 -0.0011 -1.0000
vn -0.0518 -0.1168 -0.9918
vn -0.0247 -0.0530 -0.9983
vn -0.0369 -0.0263 -0.9990
vn -0.0932 -0.0582 -0.9939
vn -0.0098 -0.0230 -0.9997
vn -0.0021 -0.0064 -1.0000
vn -0.0021 -0.0021 -1.0000
vn -0.0119 -0.0098 -0.9999
vn 0.0162 0.0078 -0.9998
vn 0.0048 0.0036 -1.0000
vn 0.0018 0.0018 -1.0000
vn 0.0096 0.0059 -0.9999
vn 0.0900 0.0446 -0.9949
vn 0.0409 0.0206 -0.9990
vn 0.0712 -0.0349 -0.9969
vn 0.0313 -0.0159 -0.9994
vn 0.0359 -0.0461 -0.9983
vn 0.0891 -0.0984 -0.9912
vn 0.0021 -0.0021 -1.0000
vn 0.0021 -0.0064 -1.0000
vn 0.0119 -0.0208 -0.9997
vn 0.0063 -0.0043 -1.0000
vn -0.0002 0.0002 -1.0000
vn -0.0033 0.0028 -1.0000
vn -0.0004 0.0004 -1.0000
vn -0.0134 0.0072 -0.9999
vn -0.0362 0.0186 -0.9992
vn -0.0015 0.0015 -1.0000
vn -0.0810 0.0401 -0.9959
vn -0.1524 0.0665 -0.9861
vn -0.0246 0.0119 -0.9996
vn -0.0082 0.0053 -1.0000
vn 0.0484 -0.0237 -0.9985
vn -0.0023 0.0023 -1.0000
vn -0.0116 0.0070 -0.9999
vn -0.0334 0.0173 -0.9993
vn -0.0012 0.0012 -1.0000
vn -0.0028 0.0026 -1.0000
vn -0.0125 0.0071 -0.9999
vn -0.0758 0.0374 -0.9964
vn -0.1450 0.0633 -0.9874
vn -0.0221 0.0103 -0.9997
vn -0.0072 0.0048 -1.0000
vn -0.2279 0.0899 -0.9695
vn -0.3115 0.1295 -0.9414
vn -0.1132 0.0551 -0.9920
vn -0.0526 0.0258 -0.9983
vn -0.1415 0.0618 -0.9880
vn -0.2239 0.0878 -0.9706
vn -0.0501 0.0245 -0.9984
vn -0.0208 0.0095 -0.9997
vn -0.3072 0.1286 -0.9429
vn -0.4643 0.1885 -0.8654
vn -0.1886 0.0763 -0.9791
vn -0.1098 0.0548 -0.9924
vn -0.9269 0.3747 -0.0186
vn -0.9224 0.3626 -0.1333
vn -0.9097 0.3948 -0.1289
vn -0.9270 0.3747 -0.0186
vn -0.8533 0.3327 -0.4016
vn -0.6797 0.2672 -0.6831
vn -0.6291 0.2426 -0.7385
vn -0.8234 0.3786 -0.4228
vn -0.5138 0.2149 -0.8305
vn -0.7475 0.3241 -0.5798
vn -0.3454 0.1396 -0.9280
vn -0.9192 0.3661 -0.1449
vn -0.9098 0.3897 -0.1427
vn -0.9150 0.3819 -0.1299
vn -0.8442 0.3226 -0.4281
vn -0.6494 0.2507 -0.7179
vn -0.5879 0.2347 -0.7742
vn -0.8284 0.3546 -0.4335
vn -0.7172 0.2911 -0.6332
vn -0.8853 0.3685 -0.2838
vn -0.8448 0.3536 -0.4016
vn -0.6363 0.2430 -0.7322
vn -0.5431 0.2132 -0.8122
vn -0.7701 0.3152 -0.5546
vn -0.3494 0.1414 -0.9262
vn -0.2682 0.1009 -0.9581
vn -0.9153 0.3819 -0.1278
vn -0.9230 0.3615 -0.1321
vn -0.9098 0.3904 -0.1411
vn -0.8297 0.3553 -0.4306
vn -0.5918 0.2357 -0.7709
vn -0.5182 0.2171 -0.8272
vn -0.7503 0.3254 -0.5754
vn -0.6842 0.2683 -0.6781
vn -0.8548 0.3323 -0.3986
vn -0.8861 0.3686 -0.2809
vn -0.9171 0.3847 -0.1042
vn -0.9291 0.3506 -0.1172
vn -0.9099 0.3946 -0.1282
vn -0.8883 0.3336 -0.3156
vn -0.8905 0.3783 -0.2527
vn -0.0348 0.0179 -0.9992
vn -0.0783 0.0387 -0.9962
vn -0.0077 0.0050 -1.0000
vn -0.0014 0.0014 -1.0000
vn -0.1485 0.0648 -0.9868
vn -0.2319 0.0919 -0.9684
vn -0.0552 0.0271 -0.9981
vn -0.0233 0.0111 -0.9997
vn -0.7767 0.3194 -0.5429
vn -0.5516 0.2168 -0.8055
vn -0.4706 0.1920 -0.8612
vn -0.7215 0.2983 -0.6248
vn -0.2718 0.1031 -0.9568
vn -0.1921 0.0771 -0.9783
vn -0.9236 0.3603 -0.1308
vn -0.9100 0.3944 -0.1275
vn -0.8564 0.3320 -0.3955
vn -0.6888 0.2692 -0.6731
vn -0.6432 0.2435 -0.7259
vn -0.8483 0.3523 -0.3953
vn -0.5226 0.2193 -0.8239
vn -0.7531 0.3268 -0.5711
vn -0.3536 0.1432 -0.9244
vn -0.3158 0.1303 -0.9398
vn -0.4769 0.1953 -0.8570
vn -0.1956 0.0779 -0.9776
vn -0.1166 0.0555 -0.9916
vn -0.8515 0.3512 -0.3894
vn -0.6498 0.2445 -0.7197
vn -0.5596 0.2206 -0.7989
vn -0.7827 0.3235 -0.5318
vn -0.3582 0.1454 -0.9222
vn -0.2757 0.1059 -0.9554
vn -0.9196 0.3661 -0.1425
vn -0.9097 0.3910 -0.1395
vn -0.9157 0.3818 -0.1257
vn -0.8455 0.3274 -0.4218
vn -0.6561 0.2547 -0.7104
vn -0.5957 0.2366 -0.7676
vn -0.8309 0.3560 -0.4276
vn -0.9177 0.3843 -0.1008
vn -0.9296 0.3506 -0.1133
vn -0.7258 0.3050 -0.6166
vn -0.9102 0.3942 -0.1268
vn -0.8895 0.3375 -0.3081
vn -0.8923 0.3797 -0.2443
vn -0.8870 0.3687 -0.2779
vn -0.9269 0.3747 -0.0187
vn -0.9294 0.3506 -0.1153
vn -0.9194 0.3661 -0.1437
vn -0.9174 0.3845 -0.1026
vn -0.8889 0.3356 -0.3118
vn -0.8448 0.3251 -0.4250
vn -0.8914 0.3790 -0.2486
vn -0.6528 0.2527 -0.7142
vn 0.0279 0.0138 -0.9995
vn 0.0581 0.0457 -0.9973
vn 0.2465 0.1018 -0.9638
vn 0.1655 0.0710 -0.9836
vn 0.0825 0.1847 -0.9793
vn 0.0732 0.3936 -0.9164
vn 0.3396 0.3947 -0.8537
vn 0.2875 0.1940 -0.9379
vn 0.0020 0.0271 -0.9996
vn 0.0007 0.0007 -1.0000
vn 0.0007 0.4174 -0.9087
vn 0.0020 0.1784 -0.9839
vn 0.1894 0.9705 -0.1492
vn 0.0082 0.9878 -0.1554
vn 0.2076 0.9781 -0.0171
vn 0.1503 0.6975 -0.7006
vn 0.0404 0.7299 -0.6823
vn 0.0192 0.9364 -0.3503
vn 0.2785 0.8550 -0.4376
vn -0.0038 0.0031 -1.0000
vn -0.0109 0.0305 -0.9995
vn -0.0134 0.1777 -0.9840
vn -0.0074 0.4135 -0.9105
vn -0.2363 0.0938 -0.9671
vn -0.3171 0.1345 -0.9388
vn -0.1135 0.0690 -0.9911
vn -0.0578 0.0284 -0.9979
vn -0.7453 0.4695 -0.4733
vn -0.4527 0.3864 -0.8036
vn -0.4543 0.2361 -0.8590
vn -0.7172 0.3268 -0.6156
vn -0.1166 0.3680 -0.9225
vn -0.1492 0.1808 -0.9721
vn -0.0015 0.7415 -0.6709
vn -0.1236 0.9823 -0.1405
vn -0.4552 0.8766 -0.1565
vn -0.3764 0.9260 -0.0274
vn -0.1249 0.9919 -0.0251
vn -0.0711 0.7324 -0.6772
vn -0.3416 0.6826 -0.6461
vn -0.4167 0.8276 -0.3761
vn -0.0885 0.9445 -0.3163
vn 0.5534 0.5345 -0.6387
vn -0.7427 0.6112 -0.2734
vn -0.9160 0.3817 -0.1234
vn -0.9243 0.3591 -0.1295
vn -0.9097 0.3918 -0.1379
vn -0.8322 0.3566 -0.4246
vn -0.5996 0.2374 -0.7643
vn -0.5273 0.2211 -0.8204
vn -0.7557 0.3275 -0.5671
vn -0.6931 0.2698 -0.6684
vn -0.8578 0.3314 -0.3928
vn -0.8880 0.3688 -0.2748
vn -0.9280 0.3722 -0.0176
vn -0.9002 0.4130 -0.1384
vn -0.9199 0.3659 -0.1411
vn -0.9269 0.3748 -0.0187
vn -0.8458 0.3280 -0.4207
vn -0.6595 0.2566 -0.7065
vn -0.8915 0.3293 -0.3112
vn -0.7580 0.6519 -0.0204
vn -0.7575 0.6502 -0.0583
vn -0.8923 0.3655 -0.2651
vn 0.9297 0.3679 -0.0187
vn 0.9217 0.3596 -0.1452
vn 0.9315 0.3439 -0.1181
vn 0.7171 0.2810 -0.6378
vn 0.4628 0.1831 -0.8674
vn 0.5381 0.2069 -0.8171
vn 0.7672 0.3064 -0.5634
vn 0.1876 0.0743 -0.9794
vn 0.2656 0.0973 -0.9592
vn 0.9124 0.3883 -0.1292
vn 0.9247 0.3564 -0.1341
vn 0.8440 0.3491 -0.4071
vn 0.6314 0.2383 -0.7379
vn 0.6811 0.2618 -0.6838
vn 0.8552 0.3264 -0.4027
vn 0.5129 0.2103 -0.8323
vn 0.7479 0.3185 -0.5824
vn 0.3455 0.1373 -0.9283
vn 0.6506 0.2458 -0.7185
vn 0.8465 0.3154 -0.4289
vn 0.8905 0.3257 -0.3178
vn 0.9196 0.3785 -0.1053
vn 0.8924 0.3718 -0.2556
vn 0.9125 0.3828 -0.1440
vn 0.9216 0.3596 -0.1463
vn 0.9175 0.3754 -0.1313
vn 0.8298 0.3485 -0.4359
vn 0.5857 0.2300 -0.7772
vn 0.6471 0.2436 -0.7224
vn 0.8458 0.3129 -0.4320
vn 0.9314 0.3439 -0.1197
vn 0.9194 0.3787 -0.1068
vn 0.8873 0.3620 -0.2856
vn 0.8900 0.3234 -0.3215
vn 0.8916 0.3712 -0.2594
vn 0.0011 0.0011 -1.0000
vn 0.0067 0.0045 -1.0000
vn 0.0734 0.0357 -0.9967
vn 0.0326 0.0165 -0.9993
vn 0.0203 0.0092 -0.9998
vn 0.0484 0.0234 -0.9986
vn 0.2217 0.0850 -0.9714
vn 0.1408 0.0605 -0.9882
vn -0.0146 -0.0074 -0.9999
vn 0.0022 0.0022 -1.0000
vn 0.1067 0.0535 -0.9928
vn 0.1843 0.0732 -0.9801
vn 0.4563 0.1792 -0.8716
vn 0.3034 0.1258 -0.9445
vn 0.7599 0.3016 -0.5758
vn 0.5291 0.2030 -0.8239
vn 0.6240 0.2379 -0.7443
vn 0.8403 0.3505 -0.4136
vn 0.2619 0.0950 -0.9604
vn 0.3414 0.1356 -0.9301
vn 0.0010 0.0010 -1.0000
vn 0.0313 0.0157 -0.9994
vn 0.0110 0.0066 -0.9999
vn 0.0062 0.0042 -1.0000
vn 0.0192 0.0088 -0.9998
vn 0.1372 0.0594 -0.9888
vn 0.0708 0.0344 -0.9969
vn 0.7127 0.2730 -0.6462
vn 0.9122 0.3886 -0.1298
vn 0.9241 0.3575 -0.1353
vn 0.9172 0.3753 -0.1333
vn 0.9141 0.3795 -0.1429
vn 0.7451 0.3172 -0.5867
vn 0.5083 0.2081 -0.8357
vn 0.5859 0.2295 -0.7772
vn 0.8293 0.3457 -0.4391
vn 0.6766 0.2607 -0.6887
vn 0.8536 0.3267 -0.4057
vn 0.8865 0.3619 -0.2883
vn 0.9209 0.3620 -0.1447
vn 0.9303 0.3446 -0.1254
vn 0.8666 0.3210 -0.3820
vn 0.6669 0.2450 -0.7037
vn 0.7092 0.2670 -0.6524
vn 0.8658 0.3219 -0.3832
vn 0.0462 0.0224 -0.9987
vn 0.0982 0.0471 -0.9941
vn 0.2995 0.1192 -0.9466
vn 0.2174 0.0834 -0.9725
vn 0.1751 0.0729 -0.9818
vn 0.2590 0.0987 -0.9608
vn 0.5521 0.2204 -0.8041
vn 0.3868 0.1550 -0.9090
vn 0.7683 0.3202 -0.5543
vn 0.9121 0.3886 -0.1307
vn 0.9235 0.3584 -0.1365
vn 0.8395 0.3531 -0.4130
vn 0.6167 0.2353 -0.7512
vn 0.6725 0.2593 -0.6932
vn 0.8522 0.3267 -0.4087
vn 0.5037 0.2060 -0.8390
vn 0.7422 0.3159 -0.5910
vn 0.3389 0.1326 -0.9314
vn 0.9143 0.3785 -0.1440
vn 0.9208 0.3619 -0.1453
vn 0.9170 0.3753 -0.1353
vn 0.8282 0.3446 -0.4419
vn 0.5821 0.2276 -0.7806
vn 0.6638 0.2431 -0.7073
vn 0.8659 0.3206 -0.3839
vn 0.9205 0.3741 -0.1134
vn 0.8858 0.3617 -0.2909
vn 0.8949 0.3621 -0.2607
vn -0.3225 -0.1308 -0.9375
vn -0.2391 -0.0942 -0.9664
vn -0.0590 -0.0289 -0.9978
vn -0.1215 -0.0559 -0.9910
vn -0.1551 -0.0673 -0.9856
vn -0.0828 -0.0411 -0.9957
vn -0.0085 -0.0054 -0.9999
vn -0.0252 -0.0122 -0.9996
vn -0.9275 -0.3732 -0.0188
vn -0.9250 -0.3566 -0.1309
vn -0.9167 -0.3804 -0.1223
vn -0.9102 -0.3909 -0.1371
vn -0.7574 -0.3262 -0.5657
vn -0.5304 -0.2207 -0.8185
vn -0.6017 -0.2367 -0.7628
vn -0.8332 -0.3558 -0.4234
vn -0.8583 -0.3304 -0.3926
vn -0.6948 -0.2693 -0.6669
vn -0.8889 -0.3676 -0.2733
vn -0.8176 -0.3334 -0.4694
vn -0.5671 -0.2240 -0.7926
vn -0.6530 -0.2397 -0.7185
vn -0.8474 -0.3395 -0.4083
vn -0.2784 -0.1078 -0.9544
vn -0.3617 -0.1468 -0.9207
vn -0.9265 -0.3759 -0.0182
vn -0.9121 -0.3829 -0.1467
vn -0.8922 -0.3773 -0.2482
vn -0.0371 -0.0189 -0.9991
vn -0.0140 -0.0073 -0.9999
vn -0.0037 -0.0030 -1.0000
vn -0.4847 -0.2018 -0.8511
vn -0.3196 -0.1305 -0.9385
vn -0.1194 -0.0556 -0.9913
vn -0.1982 -0.0781 -0.9770
vn -0.2359 -0.0933 -0.9673
vn -0.1522 -0.0661 -0.9861
vn -0.0245 -0.0117 -0.9996
vn -0.0574 -0.0281 -0.9980
vn -0.9284 -0.3713 -0.0181
vn -0.9263 -0.3523 -0.1339
vn -0.9264 -0.3736 -0.0472
vn -0.9273 -0.3739 -0.0171
vn -0.9102 -0.3904 -0.1382
vn -0.9202 -0.3649 -0.1415
vn -0.9274 -0.3736 -0.0188
vn -0.9165 -0.3804 -0.1237
vn -0.8324 -0.3554 -0.4251
vn -0.5992 -0.2366 -0.7648
vn -0.6591 -0.2553 -0.7074
vn -0.8460 -0.3266 -0.4215
vn -0.9107 -0.3930 -0.1269
vn -0.9247 -0.3579 -0.1297
vn -0.8520 -0.3501 -0.3892
vn -0.6502 -0.2436 -0.7196
vn -0.6934 -0.2688 -0.6685
vn -0.8582 -0.3302 -0.3930
vn -0.7558 -0.3265 -0.5676
vn -0.5271 -0.2202 -0.8207
vn -0.3582 -0.1449 -0.9223
vn -0.9182 -0.3831 -0.1007
vn -0.8883 -0.3675 -0.2753
vn -0.8928 -0.3786 -0.2441
vn -0.8919 -0.3274 -0.3121
vn -0.7284 -0.3156 -0.6081
vn 0.0105 0.0064 -0.9999
vn 0.0021 0.0021 -1.0000
vn 0.0009 0.0009 -1.0000
vn 0.0057 0.0040 -1.0000
vn 0.0682 0.0332 -0.9971
vn 0.0301 0.0149 -0.9994
vn -0.0810 -0.0400 -0.9959
vn -0.0363 -0.0185 -0.9992
vn -0.0082 -0.0053 -1.0000
vn -0.0135 -0.0072 -0.9999
vn 0.0180 0.0083 -0.9998
vn 0.0439 0.0215 -0.9988
vn 0.2131 0.0817 -0.9736
vn 0.1336 0.0583 -0.9893
vn 0.0943 0.0457 -0.9945
vn 0.1701 0.0713 -0.9828
vn 0.3807 0.1527 -0.9120
vn 0.2945 0.1164 -0.9486
vn 0.0288 0.0141 -0.9995
vn 0.0100 0.0062 -0.9999
vn -0.7266 -0.3044 -0.6159
vn -0.4778 -0.1950 -0.8565
vn -0.5603 -0.2200 -0.7985
vn -0.7834 -0.3226 -0.5313
vn -0.1961 -0.0776 -0.9775
vn -0.2759 -0.1056 -0.9554
vn -0.3168 -0.1301 -0.9395
vn -0.2331 -0.0921 -0.9681
vn -0.0558 -0.0273 -0.9981
vn -0.1173 -0.0554 -0.9916
vn -0.9201 -0.3648 -0.1424
vn -0.9302 -0.3493 -0.1131
vn -0.9243 -0.3587 -0.1305
vn -0.9163 -0.3805 -0.1251
vn -0.9102 -0.3900 -0.1392
vn -0.7542 -0.3262 -0.5699
vn -0.5242 -0.2193 -0.8229
vn -0.5968 -0.2361 -0.7668
vn -0.8317 -0.3551 -0.4269
vn -0.8573 -0.3307 -0.3945
vn -0.6907 -0.2686 -0.6714
vn -0.8878 -0.3675 -0.2771
vn -0.8461 -0.3265 -0.4214
vn -0.6570 -0.2541 -0.7098
vn -0.8900 -0.3364 -0.3078
vn -0.1497 -0.0651 -0.9866
vn -0.0793 -0.0391 -0.9961
vn -0.0079 -0.0051 -1.0000
vn -0.0237 -0.0112 -0.9997
vn -0.0354 -0.0181 -0.9992
vn -0.0130 -0.0072 -0.9999
vn -0.7798 -0.3201 -0.5380
vn -0.5555 -0.2176 -0.8026
vn -0.6463 -0.2429 -0.7234
vn -0.8501 -0.3507 -0.3928
vn -0.2735 -0.1038 -0.9563
vn -0.3552 -0.1434 -0.9237
vn -0.4740 -0.1929 -0.8591
vn -0.3142 -0.1296 -0.9405
vn -0.1152 -0.0552 -0.9918
vn -0.1939 -0.0771 -0.9780
vn -0.7240 -0.3004 -0.6210
vn -0.9106 -0.3931 -0.1273
vn 0.9296 0.3460 -0.1271
vn 0.9200 0.3744 -0.1159
vn 0.8647 0.3225 -0.3852
vn 0.8938 0.3623 -0.2643
vn 0.7658 0.3206 -0.5574
vn 0.5467 0.2196 -0.8080
vn 0.6129 0.2346 -0.7546
vn 0.8382 0.3525 -0.4161
vn 0.2538 0.0971 -0.9624
vn 0.3313 0.1349 -0.9338
vn 0.9299 0.3673 -0.0180
vn 0.9237 0.3577 -0.1373
vn 0.9037 0.4073 -0.1319
vn 0.9317 0.3628 -0.0144
vn 0.7294 0.3229 -0.6030
vn 0.4696 0.2343 -0.8512
vn 0.4681 0.3778 -0.7988
vn 0.7576 0.4616 -0.4615
vn 0.6696 0.2573 -0.6967
vn 0.8510 0.3249 -0.4126
vn 0.8948 0.3271 -0.3039
vn 0.0052 0.0037 -1.0000
vn 0.0135 0.0311 -0.9994
vn 0.1235 0.0703 -0.9898
vn 0.0656 0.0319 -0.9973
vn 0.0165 0.1777 -0.9840
vn 0.0095 0.4124 -0.9110
vn 0.1224 0.3639 -0.9233
vn 0.1584 0.1794 -0.9709
vn 0.9122 0.3878 -0.1326
vn 0.7617 0.5951 -0.2563
vn 0.7693 0.6373 -0.0460
vn 0.4814 0.8647 -0.1432
vn 0.4053 0.9140 -0.0182
vn 0.7685 0.6397 -0.0120
vn 0.1369 0.9814 -0.1349
vn 0.1458 0.9891 -0.0214
vn 0.0735 0.7304 -0.6791
vn 0.0021 0.7410 -0.6715
vn 0.0940 0.9449 -0.3136
vn 0.3543 0.6764 -0.6457
vn 0.4404 0.8206 -0.3643
vn -0.0031 -0.0027 -1.0000
vn -0.0002 0.0263 -0.9997
vn -0.2306 -0.0908 -0.9688
vn -0.1445 -0.0410 -0.9887
vn -0.0229 0.0157 -0.9996
vn -0.0542 -0.0265 -0.9982
vn -0.0659 0.1362 -0.9885
vn -0.0168 0.4029 -0.9151
vn -0.0013 0.4169 -0.9090
vn -0.0076 0.1743 -0.9847
vn -0.0013 0.7418 -0.6707
vn 0.7059 0.2666 -0.6562
vn -0.9300 -0.3493 -0.1144
vn -0.9180 -0.3832 -0.1018
vn -0.9103 -0.3896 -0.1402
vn -0.9200 -0.3648 -0.1431
vn -0.9161 -0.3806 -0.1265
vn -0.8309 -0.3546 -0.4288
vn -0.5944 -0.2355 -0.7689
vn -0.6550 -0.2529 -0.7121
vn -0.8457 -0.3251 -0.4233
vn -0.8896 -0.3352 -0.3101
vn -0.8922 -0.3781 -0.2468
vn -0.8872 -0.3675 -0.2790
vn -0.9105 -0.3932 -0.1278
vn -0.9239 -0.3594 -0.1313
vn -0.8480 -0.3515 -0.3966
vn -0.6397 -0.2396 -0.7304
vn -0.6880 -0.2680 -0.6744
vn -0.8564 -0.3309 -0.3964
vn -0.7525 -0.3253 -0.5726
vn -0.5215 -0.2179 -0.8250
vn -0.3466 -0.1296 -0.9290
vn -0.6933 -0.2555 -0.6738
vn -0.3454 0.0543 -0.9369
vn -0.5191 -0.1295 -0.8448
vn -0.7708 -0.3020 -0.5610
vn -0.1153 0.3161 -0.9417
vn -0.2353 0.0433 -0.9710
vn -0.9879 -0.1540 -0.0166
vn -0.9767 -0.1602 -0.1426
vn -0.9298 -0.3494 -0.1156
vn -0.9178 -0.3834 -0.1029
vn -0.8857 -0.1851 -0.4257
vn -0.6037 -0.0331 -0.7965
vn -0.8893 -0.3340 -0.3124
vn -0.8917 -0.3777 -0.2494
vn -0.0813 0.9870 -0.1384
vn -0.0906 0.9957 -0.0173
vn -0.0302 0.7103 -0.7033
vn -0.0871 0.6451 -0.7591
vn -0.0593 0.9419 -0.3308
vn -0.7441 0.6464 -0.1689
vn -0.7433 0.6687 -0.0187
vn -0.4778 0.4752 -0.7388
vn -0.7015 0.5954 -0.3918
vn -0.8394 0.5314 -0.1138
vn -0.8537 0.5203 -0.0209
vn -0.8001 0.5197 -0.2994
s 1
f 7//1 8//2 10//2 9//3
f 14//4 15//5 17//6 16//7
f 12//8 16//7 17//6 13//9
f 11//10 13//9 17//6 15//5
f 18//11 19//2 21//2 20//12
f 18//11 22//13 23//2 19//2
f 5//14 6//15 15//5 14//4
f 9//3 10//2 23//2 22//13
f 4//16 7//1 9//3 6//15
f 11//10 18//11 20//12 13//9
f 11//10 15//5 22//13 18//11
f 6//15 9//3 22//13 15//5
f 26//17 27//2 29//2 28//18
f 31//19 32//20 34//21 33//22
f 37//23 38//2 40//2 39//24
f 35//25 39//24 40//2 36//2
f 41//26 42//27 44//28 43//29
f 41//26 43//29 46//30 45//31
f 49//32 51//33 53//34 52//35
f 24//36 25//37 44//28 42//27
f 26//17 47//38 48//2 27//2
f 31//19 49//32 50//39 32//20
f 31//19 33//22 51//33 49//32
f 43//29 44//28 50//39 49//32
f 43//29 49//32 52//35 46//30
f 28//18 29//2 38//2 37//23
f 24//36 26//17 28//18 25//37
f 32//20 37//23 39//24 34//21
f 30//40 34//21 39//24 35//25
f 25//37 28//18 37//23 32//20
f 24//36 42//27 47//38 26//17
f 25//37 32//20 50//39 44//28
f 12//8 13//9 42//27 41//26
f 12//8 41//26 45//31 16//7
f 20//12 21//2 48//2 47//38
f 13//9 20//12 47//38 42//27
f 2//41 3//2 8//2 7//1
f 1//42 2//41 7//1 4//16
f 60//43 61//2 63//2 62//44
f 55//45 56//2 61//2 60//43
f 57//46 60//43 62//44 59//47
f 54//48 55//45 60//43 57//46
f 67//49 69//50 70//51 68//52
f 71//53 73//54 74//55 72//56
f 75//57 77//58 78//59 76//60
f 65//61 71//53 72//56 66//62
f 69//50 75//57 76//60 70//51
f 64//63 66//62 69//50 67//49
f 72//56 74//55 77//58 75//57
f 66//62 72//56 75//57 69//50
f 79//64 80//65 82//66 81//67
f 79//64 83//68 84//69 80//65
f 79//64 81//67 85//70 83//68
f 86//71 87//2 89//2 88//72
f 90//73 91//74 93//75 92//76
f 90//73 92//76 95//77 94//78
f 96//79 97//80 99//81 98//82
f 100//83 101//84 103//85 102//86
f 83//68 85//70 97//80 96//79
f 94//78 95//77 101//84 100//83
f 81//67 82//66 91//74 90//73
f 81//67 90//73 94//78 85//70
f 97//80 100//83 102//86 99//81
f 80//65 86//71 88//72 82//66
f 85//70 94//78 100//83 97//80
f 55//45 88//72 89//2 56//2
f 58//87 92//76 93//75 59//47
f 57//46 59//47 93//75 91//74
f 54//48 82//66 88//72 55//45
f 54//48 57//46 91//74 82//66
f 65//61 66//62 84//69 83//68
f 64//63 80//65 84//69 66//62
f 71//53 96//79 98//82 73//54
f 67//49 68//52 87//2 86//71
f 64//63 67//49 86//71 80//65
f 65//61 83//68 96//79 71//53
f 107//88 109//89 110//90 108//91
f 105//92 106//93 109//89 107//88
f 116//94 117//95 115//96 114//97
f 111//98 114//97 115//96 112//99
f 111//98 113//100 116//94 114//97
f 120//101 121//102 119//103 118//104
f 122//105 123//106 126//107 124//108
f 132//109 133//110 131//111 130//112
f 136//113 137//114 135//115 134//116
f 136//113 138//117 139//118 137//114
f 120//101 128//119 129//102 121//102
f 124//108 130//112 131//111 125//120
f 124//108 126//107 132//109 130//112
f 124//108 125//120 117//95 116//94
f 113//100 122//105 124//108 116//94
f 134//116 135//115 129//102 128//119
f 117//95 120//101 118//104 115//96
f 133//110 136//113 134//116 131//111
f 131//111 134//116 128//119 127//121
f 117//95 127//121 128//119 120//101
f 117//95 125//120 131//111 127//121
f 111//98 112//99 105//92 104//122
f 105//92 112//99 115//96 106//93
f 118//104 119//103 110//90 109//89
f 115//96 118//104 109//89 106//93
f 73//54 104//122 105//92 74//55
f 77//58 107//88 108//91 78//59
f 74//55 105//92 107//88 77//58
f 98//82 99//81 113//100 111//98
f 102//86 103//85 123//106 122//105
f 99//81 102//86 122//105 113//100
f 73//54 98//82 111//98 104//122
f 142//123 143//2 145//2 144//124
f 149//125 150//126 152//127 151//128
f 147//129 151//128 152//127 148//130
f 146//131 148//130 152//127 150//126
f 153//132 154//2 156//2 155//133
f 153//132 157//134 158//2 154//2
f 159//135 160//136 162//137 161//138
f 159//135 161//138 164//139 163//140
f 140//141 141//142 162//137 160//136
f 142//123 165//143 166//2 143//2
f 147//129 148//130 160//136 159//135
f 147//129 159//135 163//140 151//128
f 155//133 156//2 166//2 165//143
f 140//141 142//123 144//124 141//142
f 146//131 153//132 155//133 148//130
f 146//131 150//126 157//134 153//132
f 148//130 155//133 165//143 160//136
f 140//141 160//136 165//143 142//123
f 168//144 169//145 171//146 170//147
f 174//148 175//2 177//2 176//149
f 172//150 176//149 177//2 173//2
f 178//151 179//152 181//153 180//154
f 178//151 182//155 183//156 179//152
f 178//151 180//154 184//157 182//155
f 185//158 186//2 188//2 187//159
f 189//160 191//161 193//162 192//163
f 194//164 195//165 197//166 196//167
f 168//144 189//160 190//168 169//145
f 168//144 170//147 191//161 189//160
f 182//155 184//157 195//165 194//164
f 170//147 171//146 183//156 182//155
f 167//169 179//152 183//156 171//146
f 191//161 194//164 196//167 193//162
f 172//150 173//2 186//2 185//158
f 169//145 174//148 176//149 171//146
f 167//169 171//146 176//149 172//150
f 179//152 185//158 187//159 181//153
f 167//169 172//150 185//158 179//152
f 170//147 182//155 194//164 191//161
f 198//170 199//171 201//172 200//173
f 202//174 203//175 205//176 204//177
f 206//178 207//179 209//180 208//181
f 210//182 211//182 213//182 212//182
f 200//173 201//172 207//179 206//178
f 204//177 205//176 211//182 210//182
f 199//171 202//174 204//177 201//172
f 207//179 210//182 212//182 209//180
f 201//172 204//177 210//182 207//179
f 214//183 215//184 217//182 216//185
f 218//186 219//182 221//182 220//182
f 222//182 223//182 225//182 224//182
f 226//182 227//182 229//182 228//182
f 216//185 217//182 223//182 222//182
f 220//182 221//182 227//182 226//182
f 215//184 218//186 220//182 217//182
f 223//182 226//182 228//182 225//182
f 217//182 220//182 226//182 223//182
f 149//125 151//128 199//171 198//170
f 163//140 164//139 203//175 202//174
f 151//128 163//140 202//174 199//171
f 192//163 193//162 215//184 214//183
f 196//167 197//166 219//182 218//186
f 193//162 196//167 218//186 215//184
f 161//138 162//137 190//168 189//160
f 161//138 189//160 192//163 164//139
f 144//124 145//2 175//2 174//148
f 141//142 144//124 174//148 169//145
f 141//142 169//145 190//168 162//137
f 203//175 214//183 216//185 205//176
f 211//182 222//182 224//182 213//182
f 205//176 216//185 222//182 211//182
f 164//139 192//163 214//183 203//175
f 230//187 231//188 233//189 232//190
f 230//187 232//190 235//191 234//192
f 236//193 237//194 239//195 238//196
f 240//197 241//198 243//199 242//200
f 244//201 245//186 247//182 246//182
f 234//192 235//191 241//198 240//197
f 238//196 239//195 245//186 244//201
f 232//190 236//193 238//196 235//191
f 241//198 244//201 246//182 243//199
f 235//191 238//196 244//201 241//198
f 248//202 249//203 251//204 250//205
f 252//206 253//207 255//182 254//199
f 256//182 257//182 259//208 258//182
f 260//182 261//209 263//210 262//211
f 250//205 251//204 257//182 256//182
f 254//199 255//182 261//209 260//182
f 249//203 252//206 254//199 251//204
f 257//182 260//182 262//211 259//208
f 251//204 254//199 260//182 257//182
f 264//182 265//182 267//211 266//208
f 268//209 269//212 271//213 270//210
f 272//214 273//215 275//216 274//217
f 276//218 277//219 279//220 278//221
f 266//208 267//211 273//215 272//214
f 270//210 271//213 277//219 276//218
f 265//182 268//209 270//210 267//211
f 273//215 276//218 278//221 275//216
f 267//211 270//210 276//218 273//215
f 280//222 281//223 283//224 282//225
f 284//226 285//227 287//228 286//229
f 290//230 293//231 292//232 289//233
f 288//234 289//233 292//232 291//235
f 296//236 297//237 295//238 294//239
f 298//240 299//241 301//242 300//243
f 304//244 307//245 306//246 303//247
f 302//248 303//247 306//246 305//249
f 282//225 283//224 289//233 288//234
f 286//229 287//228 296//236 294//239
f 281//223 284//226 286//229 283//224
f 294//239 295//238 290//230 289//233
f 292//232 293//231 299//241 298//240
f 290//230 295//238 299//241 293//231
f 297//237 303//247 302//248 295//238
f 299//241 305//249 306//246 301//242
f 302//248 305//249 299//241 295//238
f 283//224 286//229 294//239 289//233
f 242//200 243//199 265//182 264//182
f 246//182 247//182 269//212 268//209
f 243//199 246//182 268//209 265//182
f 258//182 259//208 281//223 280//222
f 262//211 263//210 285//227 284//226
f 259//208 262//211 284//226 281//223
f 237//194 248//202 250//205 239//195
f 245//186 256//182 258//182 247//182
f 239//195 250//205 256//182 245//186
f 269//212 280//222 282//225 271//213
f 277//219 288//234 291//235 279//220
f 271//213 282//225 288//234 277//219
f 247//182 258//182 280//222 269//212
f 308//250 309//251 311//252 310//253
f 312//254 313//255 315//256 314//257
f 318//258 319//259 317//260 316//261
f 318//258 321//262 322//263 319//259
f 317//260 319//259 322//263 320//264
f 326//265 327//266 325//267 324//268
f 332//269 333//270 331//271 330//272
f 328//273 329//274 332//269 330//272
f 310//253 311//252 318//258 316//261
f 314//257 315//256 329//274 328//273
f 309//251 312//254 314//257 311//252
f 330//272 331//271 322//263 321//262
f 318//258 328//273 330//272 321//262
f 334//275 335//102 327//266 326//265
f 322//263 326//265 324//268 320//264
f 317//260 320//264 324//268 323//276
f 331//271 334//275 326//265 322//263
f 311//252 314//257 328//273 318//258
f 336//277 337//182 339//278 338//279
f 340//182 341//182 343//182 342//280
f 344//281 345//282 347//283 346//284
f 348//285 349//286 351//287 350//288
f 338//279 339//278 345//282 344//281
f 342//280 343//182 349//286 348//285
f 337//182 340//182 342//280 339//278
f 345//282 348//285 350//288 347//283
f 339//278 342//280 348//285 345//282
f 357//289 358//290 356//102 355//291
f 354//292 357//289 355//291 352//293
f 361//294 362//295 360//296 359//297
f 369//298 370//299 368//300 367//301
f 364//302 367//301 368//300 365//303
f 364//302 366//304 369//298 367//301
f 376//305 377//306 375//307 374//308
f 371//309 374//308 375//307 372//310
f 371//309 373//311 376//305 374//308
f 380//312 381//102 379//102 378//313
f 380//312 383//314 384//102 381//102
f 371//309 372//310 362//295 361//294
f 362//295 372//310 375//307 363//315
f 378//313 379//102 370//299 369//298
f 362//295 366//304 364//302 360//296
f 362//295 363//315 369//298 366//304
f 377//306 380//312 378//313 375//307
f 375//307 378//313 369//298 363//315
f 377//306 382//316 383//314 380//312
f 332//269 353//317 354//292 333//270
f 331//271 333//270 354//292 352//293
f 334//275 355//291 356//102 335//102
f 331//271 352//293 355//291 334//275
f 346//284 347//283 361//294 359//297
f 350//288 351//287 373//311 371//309
f 347//283 350//288 371//309 361//294
f 313//255 336//277 338//279 315//256
f 329//274 344//281 346//284 332//269
f 315//256 338//279 344//281 329//274
f 359//297 360//296 354//292 353//317
f 364//302 365//303 358//290 357//289
f 360//296 364//302 357//289 354//292
f 332//269 346//284 359//297 353//317
f 385//318 386//319 388//182 387//182
f 389//320 390//321 392//322 391//323
f 393//324 394//325 396//326 395//327
f 397//182 398//182 400//328 399//329
f 387//182 388//182 394//325 393//324
f 391//323 392//322 398//182 397//182
f 386//319 389//320 391//323 388//182
f 394//325 397//182 399//329 396//326
f 388//182 391//323 397//182 394//325
f 401//330 402//331 404//332 403//333
f 405//334 406//335 409//336 408//337
f 410//338 411//339 413//182 412//182
f 414//340 415//341 417//323 416//182
f 403//333 404//332 411//339 410//338
f 408//337 409//336 415//341 414//340
f 402//331 405//334 408//337 404//332
f 411//339 414//340 416//182 413//182
f 404//332 408//337 414//340 411//339
f 418//342 419//343 422//344 420//345
f 423//346 424//347 426//348 425//349
f 429//350 430//351 428//352 427//353
f 433//354 434//355 432//356 431//357
f 433//354 435//358 436//359 434//355
f 439//360 440//361 438//362 437//363
f 439//360 442//364 443//365 440//361
f 438//362 440//361 443//365 441//366
f 447//367 448//368 446//369 445//370
f 420//345 427//353 428//352 421//371
f 420//345 422//344 429//350 427//353
f 425//349 426//348 439//360 437//363
f 419//343 423//346 425//349 422//344
f 437//363 438//362 430//351 429//350
f 445//370 446//369 436//359 435//358
f 433//354 444//372 445//370 435//358
f 430//351 433//354 431//357 428//352
f 443//365 447//367 445//370 441//366
f 438//362 441//366 445//370 444//372
f 438//362 444//372 433//354 430//351
f 422//344 425//349 437//363 429//350
f 449//373 450//374 452//375 451//376
f 453//377 454//182 456//378 455//379
f 461//380 462//381 460//382 459//383
f 457//384 458//385 461//380 459//383
f 465//386 466//387 468//388 467//389
f 451//376 452//375 458//385 457//384
f 455//379 456//378 466//387 465//386
f 450//374 453//377 455//379 452//375
f 458//385 465//386 467//389 461//380
f 452//375 455//379 465//386 458//385
f 395//327 396//326 419//343 418//342
f 399//329 400//328 424//347 423//346
f 396//326 399//329 423//346 419//343
f 412//182 413//182 450//374 449//373
f 416//182 417//323 454//182 453//377
f 413//182 416//182 453//377 450//374
f 390//321 401//330 403//333 392//322
f 398//182 410//338 412//182 400//328
f 392//322 403//333 410//338 398//182
f 424//347 449//373 451//376 426//348
f 459//383 460//382 443//365 442//364
f 439//360 457//384 459//383 442//364
f 463//390 464//102 448//368 447//367
f 460//382 463//390 447//367 443//365
f 426//348 451//376 457//384 439//360
f 400//328 412//182 449//373 424//347
f 208//181 209//180 309//251 308//250
f 212//182 213//182 313//255 312//254
f 209//180 212//182 312//254 309//251
f 224//182 225//182 337//182 336//277
f 228//182 229//182 341//182 340//182
f 225//182 228//182 340//182 337//182
f 213//182 224//182 336//277 313//255
f 274//217 275//216 386//319 385//318
f 278//221 279//220 390//321 389//320
f 275//216 278//221 389//320 386//319
f 291//235 292//232 402//331 401//330
f 301//242 407//391 406//335 300//243
f 298//240 300//243 406//335 405//334
f 292//232 298//240 405//334 402//331
f 279//220 291//235 401//330 390//321
f 180//154 181//153 231//188 230//187
f 180//154 230//187 234//192 184//157
f 195//165 240//197 242//200 197//166
f 184//157 234//192 240//197 195//165
f 219//182 264//182 266//208 221//182
f 227//182 272//214 274//217 229//182
f 221//182 266//208 272//214 227//182
f 197//166 242//200 264//182 219//182
f 341//182 385//318 387//182 343//182
f 349//286 393//324 395//327 351//287
f 343//182 387//182 393//324 349//286
f 420//345 421//371 377//306 376//305
f 373//311 418//342 420//345 376//305
f 431//357 432//356 384//102 383//314
f 428//352 431//357 383//314 382//316
f 377//306 421//371 428//352 382//316
f 351//287 395//327 418//342 373//311
f 229//182 274//217 385//318 341//182
f 469//392 471//393 472//394 470//395
f 473//396 475//397 476//398 474//399
f 470//395 472//394 475//397 473//396
f 480//400 481//401 483//401 482//402
f 486//403 487//404 489//405 488//406
f 484//407 485//408 489//405 487//404
f 490//409 491//401 493//401 492//410
f 490//409 494//411 495//401 491//401
f 496//412 497//413 499//414 498//415
f 496//412 498//415 501//416 500//417
f 504//418 505//419 507//420 506//421
f 478//422 498//415 499//414 479//423
f 477//424 479//423 499//414 497//413
f 480//400 502//425 503//426 481//401
f 486//403 488//406 505//419 504//418
f 478//422 479//423 487//404 486//403
f 498//415 504//418 506//421 501//416
f 482//402 483//401 495//401 494//411
f 477//424 480//400 482//402 479//423
f 484//407 490//409 492//410 485//408
f 484//407 487//404 494//411 490//409
f 479//423 482//402 494//411 487//404
f 477//424 497//413 502//425 480//400
f 478//422 486//403 504//418 498//415
f 469//392 470//395 497//413 496//412
f 469//392 496//412 500//417 471//393
f 473//396 474//399 503//426 502//425
f 470//395 473//396 502//425 497//413
f 513//427 514//102 512//102 511//428
f 517//429 518//430 516//431 515//432
f 516//431 518//430 520//433 519//434
f 525//435 526//102 524//102 523//436
f 521//437 523//436 524//102 522//102
f 515//432 516//431 510//438 509//439
f 521//437 522//102 514//102 513//427
f 510//438 513//427 511//428 508//440
f 520//433 525//435 523//436 519//434
f 516//431 519//434 523//436 521//437
f 516//431 521//437 513//427 510//438
f 531//441 532//442 534//443 533//444
f 537//445 538//401 540//401 539//446
f 535//447 539//446 540//401 536//401
f 544//448 545//449 547//450 546//451
f 542//452 546//451 547//450 543//453
f 541//454 543//453 547//450 545//449
f 548//455 549//401 551//401 550//456
f 533//444 534//443 545//449 544//448
f 530//457 541//454 545//449 534//443
f 535//447 536//401 549//401 548//455
f 532//442 537//445 539//446 534//443
f 530//457 534//443 539//446 535//447
f 541//454 548//455 550//456 543//453
f 530//457 535//447 548//455 541//454
f 528//458 529//401 538//401 537//445
f 527//459 528//458 537//445 532//442
f 556//460 557//461 559//462 558//463
f 562//464 563//401 565//401 564//465
f 560//466 564//465 565//401 561//401
f 553//467 554//401 563//401 562//464
f 557//461 562//464 564//465 559//462
f 555//468 559//462 564//465 560//466
f 552//469 553//467 562//464 557//461
f 569//470 570//401 572//401 571//471
f 576//472 577//473 579//474 578//475
f 574//476 578//475 579//474 575//477
f 573//478 575//477 579//474 577//473
f 580//479 581//401 583//401 582//480
f 584//481 585//482 587//483 586//484
f 584//481 586//484 589//485 588//486
f 567//487 586//484 587//483 568//488
f 566//489 568//488 587//483 585//482
f 569//470 590//490 591//401 570//401
f 574//476 575//477 585//482 584//481
f 574//476 584//481 588//486 578//475
f 582//480 583//401 591//401 590//490
f 566//489 569//470 571//471 568//488
f 573//478 580//479 582//480 575//477
f 575//477 582//480 590//490 585//482
f 566//489 585//482 590//490 569//470
f 592//491 593//492 595//493 594//494
f 592//491 596//495 597//496 593//492
f 592//491 594//494 598//497 596//495
f 599//498 600//401 602//401 601//499
f 603//500 605//501 607//502 606//503
f 608//504 609//505 611//506 610//507
f 612//508 613//509 615//182 614//510
f 596//495 598//497 609//505 608//504
f 606//503 607//502 613//509 612//508
f 594//494 595//493 604//511 603//500
f 594//494 603//500 606//503 598//497
f 609//505 612//508 614//510 611//506
f 593//492 599//498 601//499 595//493
f 598//497 606//503 612//508 609//505
f 616//512 617//513 619//514 618//515
f 620//516 621//517 623//186 622//201
f 624//518 625//185 627//182 626//182
f 628//182 629//182 631//182 630//182
f 618//515 619//514 625//185 624//518
f 622//201 623//186 629//182 628//182
f 617//513 620//516 622//201 619//514
f 625//185 628//182 630//182 627//182
f 619//514 622//201 628//182 625//185
f 553//467 601//499 602//401 554//401
f 556//460 603//500 604//511 557//461
f 556//460 558//463 605//501 603//500
f 552//469 595//493 601//499 553//467
f 552//469 557//461 604//511 595//493
f 576//472 578//475 617//513 616//512
f 588//486 589//485 621//517 620//516
f 578//475 588//486 620//516 617//513
f 558//463 559//462 577//473 576//472
f 555//468 573//478 577//473 559//462
f 560//466 561//401 581//401 580//479
f 555//468 560//466 580//479 573//478
f 605//501 616//512 618//515 607//502
f 613//509 624//518 626//182 615//182
f 607//502 618//515 624//518 613//509
f 558//463 576//472 616//512 605//501
f 634//519 635//520 637//521 636//522
f 632//523 633//524 637//521 635//520
f 638//525 639//401 641//401 640//526
f 638//525 642//527 643//401 639//401
f 644//528 645//529 647//530 646//531
f 644//528 648//532 649//533 645//529
f 644//528 646//531 650//534 648//532
f 651//535 652//401 654//401 653//536
f 655//537 656//538 658//539 657//540
f 659//541 660//542 662//543 661//544
f 634//519 636//522 656//538 655//537
f 648//532 650//534 660//542 659//541
f 636//522 637//521 649//533 648//532
f 633//524 645//529 649//533 637//521
f 656//538 659//541 661//544 658//539
f 640//526 641//401 652//401 651//535
f 632//523 638//525 640//526 633//524
f 632//523 635//520 642//527 638//525
f 645//529 651//535 653//536 647//530
f 633//524 640//526 651//535 645//529
f 636//522 648//532 659//541 656//538
f 663//545 665//546 667//547 666//548
f 668//549 669//550 671//551 670//552
f 672//553 673//554 675//182 674//186
f 676//555 677//199 679//182 678//182
f 666//548 667//547 673//554 672//553
f 670//552 671//551 677//199 676//555
f 665//546 668//549 670//552 667//547
f 673//554 676//555 678//182 675//182
f 667//547 670//552 676//555 673//554
f 680//556 681//557 683//182 682//182
f 684//199 685//182 687//182 686//182
f 688//182 689//558 691//559 690//560
f 692//561 693//562 695//563 694//564
f 682//182 683//182 689//558 688//182
f 686//182 687//182 693//562 692//561
f 681//557 684//199 686//182 683//182
f 689//558 692//561 694//564 691//559
f 683//182 686//182 692//561 689//558
f 696//182 697//182 699//565 698//566
f 700//567 701//568 703//569 702//570
f 704//571 705//572 707//573 706//574
f 712//575 713//576 711//577 710//578
f 708//579 709//580 712//575 710//578
f 698//566 699//565 705//572 704//571
f 702//570 703//569 709//580 708//579
f 697//182 700//567 702//570 699//565
f 705//572 708//579 710//578 707//573
f 699//565 702//570 708//579 705//572
f 657//540 658//539 681//557 680//556
f 661//544 662//543 685//182 684//199
f 658//539 661//544 684//199 681//557
f 674//186 675//182 697//182 696//182
f 678//182 679//182 701//568 700//567
f 675//182 678//182 700//567 697//182
f 646//531 647//530 664//581 663//545
f 646//531 663//545 666//548 650//534
f 660//542 672//553 674//186 662//543
f 650//534 666//548 672//553 660//542
f 685//182 696//182 698//566 687//182
f 693//562 704//571 706//574 695//563
f 687//182 698//566 704//571 693//562
f 662//543 674//186 696//182 685//182
f 528//458 653//536 654//401 529//401
f 527//459 647//530 653//536 528//458
f 531//441 663//545 664//581 532//442
f 531//441 533//444 665//546 663//545
f 544//448 546//451 669//550 668//549
f 533//444 544//448 668//549 665//546
f 527//459 532//442 664//581 647//530
f 567//487 568//488 635//520 634//519
f 586//484 655//537 657//540 589//485
f 571//471 572//401 643//401 642//527
f 568//488 571//471 642//527 635//520
f 567//487 634//519 655//537 586//484
f 621//517 680//556 682//182 623//186
f 629//182 688//182 690//560 631//182
f 623//186 682//182 688//182 629//182
f 589//485 657//540 680//556 621//517
f 461//380 509//439 510//438 462//381
f 460//382 462//381 510//438 508//440
f 463//390 511//428 512//102 464//102
f 467//389 468//388 517//429 515//432
f 460//382 508//440 511//428 463//390
f 461//380 467//389 515//432 509//439
f 58//87 59//47 150//126 149//125
f 62//44 63//2 158//2 157//134
f 59//47 62//44 157//134 150//126
f 92//76 198//170 200//173 95//77
f 101//84 206//178 208//181 103//85
f 95//77 200//173 206//178 101//84
f 58//87 149//125 198//170 92//76
f 123//106 308//250 310//253 126//107
f 316//261 317//260 133//110 132//109
f 324//268 325//267 139//118 138//117
f 136//113 323//276 324//268 138//117
f 317//260 323//276 136//113 133//110
f 126//107 310//253 316//261 132//109
f 103//85 208//181 308//250 123//106
f 488//406 489//405 597//496 596//495
f 485//408 593//492 597//496 489//405
f 505//419 608//504 610//507 507//420
f 492//410 493//401 600//401 599//498
f 485//408 492//410 599//498 593//492
f 488//406 596//495 608//504 505//419
f 2//41 187//159 188//2 3//2
f 1//42 181//153 187//159 2//41
f 5//14 232//190 233//189 6//15
f 4//16 6//15 233//189 231//188
f 14//4 16//7 237//194 236//193
f 5//14 14//4 236//193 232//190
f 45//31 46//30 249//203 248//202
f 52//35 53//34 253//207 252//206
f 46//30 52//35 252//206 249//203
f 16//7 45//31 248//202 237//194
f 1//42 4//16 231//188 181//153
f 714//582 716//583 717//584 715//585
f 718//586 720//587 721//588 719//589
f 716//583 722//590 723//591 717//584
f 720//587 724//592 725//593 721//588
f 715//585 717//584 720//587 718//586
f 717//584 723//591 724//592 720//587
f 726//594 727//595 729//596 728//597
f 730//598 731//599 733//600 732//601
f 736//602 737//603 735//604 734//605
f 736//602 739//606 740//607 737//603
f 735//604 737//603 740//607 738//608
f 745//609 746//610 744//611 743//612
f 741//613 743//612 744//611 742//614
f 751//615 752//616 750//617 749//618
f 747//619 748//620 751//615 749//618
f 728//597 729//596 736//602 734//605
f 732//601 733//600 748//620 747//619
f 727//595 730//598 732//601 729//596
f 749//618 750//617 740//607 739//606
f 736//602 747//619 749//618 739//606
f 753//621 754//622 746//610 745//609
f 740//607 745//609 743//612 738//608
f 735//604 738//608 743//612 741//613
f 752//616 755//623 753//621 750//617
f 750//617 753//621 745//609 740//607
f 729//596 732//601 747//619 736//602
f 759//624 760//625 758//626 757//627
f 753//621 757//627 758//626 754//622
f 753//621 755//623 759//624 757//627
f 752//616 756//628 759//624 755//623
f 714//582 726//594 728//597 716//583
f 734//605 735//604 723//591 722//590
f 741//613 742//614 725//593 724//592
f 735//604 741//613 724//592 723//591
f 716//583 728//597 734//605 722//590
f 761//629 762//182 764//630 763//631
f 765//182 766//182 768//277 767//632
f 769//633 770//634 773//635 771//636
f 774//637 775//638 777//639 776//640
f 763//631 764//630 770//634 769//633
f 767//632 768//277 775//638 774//637
f 762//182 765//182 767//632 764//630
f 770//634 774//637 776//640 773//635
f 764//630 767//632 774//637 770//634
f 778//182 779//182 781//182 780//182
f 782//182 783//182 785//182 784//182
f 786//641 787//180 789//642 788//643
f 790//182 791//182 793//644 792//645
f 780//182 781//182 787//180 786//641
f 784//182 785//182 791//182 790//182
f 779//182 782//182 784//182 781//182
f 787//180 790//182 792//645 789//642
f 781//182 784//182 790//182 787//180
f 796//646 797//647 795//648 794//649
f 801//650 802//611 800//651 799//652
f 801//650 803//653 804//611 802//611
f 810//654 811//655 809//656 808//657
f 805//658 808//657 809//656 806//659
f 805//658 807//660 810//654 808//657
f 814//661 815//662 813//663 812//664
f 814//661 816//665 817//666 815//662
f 805//658 806//659 797//647 796//646
f 797//647 806//659 809//656 798//667
f 812//664 813//663 804//611 803//653
f 797//647 801//650 799//652 795//648
f 797//647 798//667 803//653 801//650
f 811//655 814//661 812//664 809//656
f 809//656 812//664 803//653 798//667
f 822//668 823//669 821//670 820//671
f 818//672 819//673 822//668 820//671
f 825//674 826//675 828//676 827//677
f 834//678 835//679 833//680 832//681
f 838//682 839//683 837//684 836//685
f 838//682 841//686 842//687 839//683
f 837//684 839//683 842//687 840//688
f 847//689 848//690 846//611 845//691
f 843//692 845//691 846//611 844//611
f 822//668 830//693 831//694 823//669
f 821//670 823//669 831//694 829//695
f 827//677 828//676 838//682 836//685
f 819//673 825//674 827//677 822//668
f 836//685 837//684 831//694 830//693
f 843//692 844//611 835//679 834//678
f 831//694 834//678 832//681 829//695
f 842//687 847//689 845//691 840//688
f 837//684 840//688 845//691 843//692
f 837//684 843//692 834//678 831//694
f 821//670 829//695 832//681 824//696
f 822//668 827//677 836//685 830//693
f 771//636 794//649 795//648 772//697
f 771//636 773//635 796//646 794//649
f 776//640 777//639 807//660 805//658
f 773//635 776//640 805//658 796//646
f 788//643 789//642 819//673 818//672
f 792//645 793//644 826//675 825//674
f 789//642 792//645 825//674 819//673
f 766//182 778//182 780//182 768//277
f 775//638 786//641 788//643 777//639
f 768//277 780//182 786//641 775//638
f 820//671 821//670 811//655 810//654
f 807//660 818//672 820//671 810//654
f 832//681 833//680 817//666 816//665
f 821//670 824//696 814//661 811//655
f 814//661 824//696 832//681 816//665
f 777//639 788//643 818//672 807//660
f 849//698 850//699 852//700 851//701
f 853//702 854//703 856//704 855//705
f 857//706 858//707 860//182 859//277
f 861//708 862//709 864//710 863//182
f 851//701 852//700 858//707 857//706
f 855//705 856//704 862//709 861//708
f 850//699 853//702 855//705 852//700
f 858//707 861//708 863//182 860//182
f 852//700 855//705 861//708 858//707
f 865//711 866//712 868//713 867//714
f 872//715 873//716 875//717 874//718
f 870//719 873//716 872//715 869//720
f 870//719 871//721 875//717 873//716
f 877//722 879//723 878//724 876//725
f 880//726 881//727 883//728 882//729
f 884//730 885//731 887//732 886//733
f 867//714 868//713 881//727 880//726
f 872//715 874//718 885//731 884//730
f 866//712 869//720 872//715 868//713
f 881//727 884//730 886//733 883//728
f 876//725 878//724 875//717 871//721
f 868//713 872//715 884//730 881//727
f 888//734 889//735 891//736 890//737
f 892//738 893//182 895//739 894//740
f 900//741 901//742 899//743 898//744
f 896//745 897//746 900//741 898//744
f 905//747 906//748 909//749 907//750
f 890//737 891//736 897//746 896//745
f 894//740 895//739 906//748 905//747
f 889//735 892//738 894//740 891//736
f 907//750 908//751 901//742 900//741
f 897//746 905//747 907//750 900//741
f 901//742 904//752 902//753 899//743
f 891//736 894//740 905//747 897//746
f 910//182 911//182 913//754 912//755
f 914//756 915//757 917//182 916//182
f 918//758 919//759 921//760 920//761
f 922//762 923//280 925//763 924//764
f 912//755 913//754 919//759 918//758
f 916//182 917//182 923//280 922//762
f 911//182 914//756 916//182 913//754
f 919//759 922//762 924//764 921//760
f 913//754 916//182 922//762 919//759
f 859//277 860//182 889//735 888//734
f 863//182 864//710 893//182 892//738
f 860//182 863//182 892//738 889//735
f 882//729 883//728 911//182 910//182
f 886//733 887//732 915//757 914//756
f 883//728 886//733 914//756 911//182
f 854//703 865//711 867//714 856//704
f 862//709 880//726 882//729 864//710
f 856//704 867//714 880//726 862//709
f 893//182 910//182 912//755 895//739
f 906//748 918//758 920//761 909//749
f 895//739 912//755 918//758 906//748
f 864//710 882//729 910//182 893//182
f 929//765 930//766 928//767 927//768
f 933//769 934//770 932//771 931//772
f 938//773 939//611 937//774 936//775
f 938//773 940//776 941//611 939//611
f 936//775 937//774 930//766 929//765
f 934//770 938//773 936//775 932//771
f 934//770 935//777 940//776 938//773
f 932//771 936//775 929//765 926//778
f 947//779 948//780 946//781 945//782
f 942//783 945//782 946//781 943//784
f 942//783 944//785 947//779 945//782
f 951//786 952//787 950//611 949//788
f 957//789 958//790 956//791 955//792
f 953//793 954//794 957//789 955//792
f 967//795 968//611 966//796 965//797
f 951//786 960//798 961//799 952//787
f 957//789 963//800 964//801 958//790
f 956//791 958//790 964//801 962//802
f 955//792 956//791 948//780 947//779
f 944//785 953//793 955//792 947//779
f 965//797 966//796 961//799 960//798
f 948//780 951//786 949//788 946//781
f 964//801 967//795 965//797 962//802
f 956//791 959//803 951//786 948//780
f 956//791 962//802 965//797 959//803
f 951//786 959//803 965//797 960//798
f 942//783 943//784 934//770 933//769
f 934//770 943//784 946//781 935//777
f 949//788 950//611 941//611 940//776
f 946//781 949//788 940//776 935//777
f 902//753 927//768 928//767 903//804
f 902//753 904//752 929//765 927//768
f 907//750 931//772 932//771 908//751
f 907//750 909//749 933//769 931//772
f 901//742 926//778 929//765 904//752
f 901//742 908//751 932//771 926//778
f 920//761 921//760 944//785 942//783
f 924//764 925//763 954//794 953//793
f 921//760 924//764 953//793 944//785
f 909//749 920//761 942//783 933//769
f 783//182 849//698 851//701 785//182
f 791//182 857//706 859//277 793//644
f 785//182 851//701 857//706 791//182
f 826//675 888//734 890//737 828//676
f 898//744 899//743 842//687 841//686
f 838//682 896//745 898//744 841//686
f 902//753 903//804 848//690 847//689
f 899//743 902//753 847//689 842//687
f 828//676 890//737 896//745 838//682
f 793//644 859//277 888//734 826//675
f 731//599 761//629 763//631 733//600
f 771//636 772//697 752//616 751//615
f 748//620 769//633 771//636 751//615
f 733//600 763//631 769//633 748//620
f 799//652 800//651 760//625 759//624
f 795//648 799//652 759//624 756//628
f 752//616 772//697 795//648 756//628
f 471//393 714//582 715//585 472//394
f 475//397 718//586 719//589 476//398
f 472//394 715//585 718//586 475//397
f 500//417 501//416 727//595 726//594
f 506//421 507//420 731//599 730//598
f 501//416 506//421 730//598 727//595
f 471//393 500//417 726//594 714//582
f 610//507 611//506 762//182 761//629
f 614//510 615//182 766//182 765//182
f 611//506 614//510 765//182 762//182
f 626//182 627//182 779//182 778//182
f 630//182 631//182 783//182 782//182
f 627//182 630//182 782//182 779//182
f 615//182 626//182 778//182 766//182
f 690//560 691//559 850//699 849//698
f 694//564 695//563 854//703 853//702
f 691//559 694//564 853//702 850//699
f 706//574 707//573 866//712 865//711
f 711//577 870//719 869//720 710//578
f 711//577 713//576 871//721 870//719
f 707//573 710//578 869//720 866//712
f 695//563 706//574 865//711 854//703
f 631//182 690//560 849//698 783//182
f 507//420 610//507 761//629 731//599
f 972//805 973//806 975//807 974//805
f 979//805 980//808 982//809 981//805
f 979//805 983//805 984//810 980//808
f 988//811 989//812 991//813 990//814
f 986//815 990//814 991//813 987//816
f 988//811 990//814 986//815 985//817
f 974//805 975//807 984//810 983//805
f 977//818 978//819 989//812 988//811
f 973//806 976//820 977//818 975//807
f 980//808 985//817 986//815 982//809
f 980//808 984//810 988//811 985//817
f 975//807 977//818 988//811 984//810
f 992//805 993//821 995//822 994//805
f 1000//805 1001//823 1003//824 1002//805
f 998//805 1002//805 1003//824 999//825
f 1005//826 1006//827 1008//828 1007//829
f 1011//830 1012//831 1014//832 1013//833
f 1015//834 1016//835 1014//832 1012//831
f 1020//836 1021//837 1019//838 1018//839
f 992//805 1009//805 1010//840 993//821
f 1011//830 1013//833 997//841 996//842
f 1005//826 1017//843 1018//839 1006//827
f 1018//839 1019//838 1008//828 1006//827
f 994//805 995//822 1001//823 1000//805
f 1013//833 1014//832 1018//839 1017//843
f 1016//835 1020//836 1018//839 1014//832
f 993//821 996//842 997//841 995//822
f 1001//823 1005//826 1007//829 1003//824
f 999//825 1003//824 1007//829 1004//844
f 995//822 997//841 1005//826 1001//823
f 993//821 1010//840 1011//830 996//842
f 1013//833 1017//843 1005//826 997//841
f 981//805 982//809 1010//840 1009//805
f 986//815 987//816 1012//831 1011//830
f 991//813 1015//834 1012//831 987//816
f 982//809 986//815 1011//830 1010//840
f 969//805 970//845 973//806 972//805
f 970//845 971//846 976//820 973//806
f 1025//805 1026//847 1028//848 1027//805
f 1022//805 1023//849 1026//847 1025//805
f 1026//847 1029//850 1030//851 1028//848
f 1023//849 1024//852 1029//850 1026//847
f 1032//853 1034//854 1035//855 1033//856
f 1039//857 1041//858 1042//859 1040//860
f 1043//861 1045//862 1046//863 1044//864
f 1034//854 1039//857 1040//860 1035//855
f 1037//865 1043//861 1044//864 1038//866
f 1033//856 1035//855 1037//865 1036//867
f 1040//860 1042//859 1045//862 1043//861
f 1035//855 1040//860 1043//861 1037//865
f 1047//805 1048//868 1050//869 1049//805
f 1051//870 1052//871 1054//872 1053//873
f 1051//870 1055//874 1056//875 1052//871
f 1056//875 1057//876 1054//872 1052//871
f 1058//877 1059//878 1061//879 1060//880
f 1062//881 1063//882 1061//879 1059//878
f 1066//883 1067//884 1065//885 1064//886
f 1070//887 1071//888 1069//889 1068//890
f 1064//886 1065//885 1057//876 1056//875
f 1068//890 1069//889 1063//882 1062//881
f 1053//873 1054//872 1059//878 1058//877
f 1057//876 1062//881 1059//878 1054//872
f 1067//884 1070//887 1068//890 1065//885
f 1048//868 1051//870 1053//873 1050//869
f 1065//885 1068//890 1062//881 1057//876
f 1022//805 1049//805 1050//869 1023//849
f 1030//851 1060//880 1061//879 1031//891
f 1058//877 1060//880 1030//851 1029//850
f 1023//849 1050//869 1053//873 1024//852
f 1053//873 1058//877 1029//850 1024//852
f 1032//853 1033//856 1048//868 1047//805
f 1037//865 1038//866 1056//875 1055//874
f 1037//865 1055//874 1051//870 1036//867
f 1046//863 1066//883 1064//886 1044//864
f 1033//856 1036//867 1051//870 1048//868
f 1044//864 1064//886 1056//875 1038//866
f 1072//892 1074//893 1075//894 1073//895
f 1073//895 1075//894 1078//896 1076//897
f 1081//898 1082//899 1080//900 1079//901
f 1088//902 1089//903 1087//904 1086//905
f 1083//906 1086//905 1087//904 1084//907
f 1087//904 1089//903 1085//908 1084//907
f 1093//909 1094//910 1091//911 1090//912
f 1100//913 1101//914 1099//915 1098//916
f 1100//913 1102//917 1103//918 1101//914
f 1106//919 1107//920 1105//921 1104//922
f 1081//898 1095//898 1096//923 1082//899
f 1092//924 1104//922 1105//921 1093//909
f 1105//921 1107//920 1094//910 1093//909
f 1098//916 1099//915 1096//923 1095//898
f 1092//924 1093//909 1089//903 1088//902
f 1089//903 1093//909 1090//912 1085//908
f 1082//899 1088//902 1086//905 1080//900
f 1101//914 1106//919 1104//922 1099//915
f 1099//915 1104//922 1097//925 1096//923
f 1082//899 1096//923 1097//925 1088//902
f 1097//925 1104//922 1092//924 1088//902
f 1079//901 1080//900 1075//894 1074//893
f 1083//906 1084//907 1077//926 1076//897
f 1078//896 1086//905 1083//906 1076//897
f 1080//900 1086//905 1078//896 1075//894
f 1041//858 1072//892 1073//895 1042//859
f 1045//862 1076//897 1077//926 1046//863
f 1042//859 1073//895 1076//897 1045//862
f 1084//907 1085//908 1067//884 1066//883
f 1090//912 1091//911 1071//888 1070//887
f 1085//908 1090//912 1070//887 1067//884
f 1077//926 1084//907 1066//883 1046//863
f 1108//805 1109//927 1111//928 1110//805
f 1114//805 1115//929 1117//930 1116//805
f 1114//805 1118//805 1119//931 1115//929
f 1123//932 1124//933 1126//934 1125//935
f 1121//936 1125//935 1126//934 1122//937
f 1123//932 1125//935 1121//936 1120//938
f 1129//939 1130//940 1132//941 1131//942
f 1133//943 1134//944 1132//941 1130//940
f 1108//805 1127//805 1128//945 1109//927
f 1129//939 1131//942 1113//946 1112//947
f 1116//805 1117//930 1128//945 1127//805
f 1121//936 1122//937 1130//940 1129//939
f 1126//934 1133//943 1130//940 1122//937
f 1109//927 1112//947 1113//946 1111//928
f 1115//929 1120//938 1121//936 1117//930
f 1115//929 1119//931 1123//932 1120//938
f 1117//930 1121//936 1129//939 1128//945
f 1109//927 1128//945 1129//939 1112//947
f 1137//805 1138//948 1140//949 1139//805
f 1135//805 1139//805 1140//949 1136//950
f 1142//951 1143//952 1145//953 1144//954
f 1146//805 1147//955 1149//956 1148//805
f 1150//957 1151//958 1153//959 1152//960
f 1150//957 1154//961 1155//962 1151//958
f 1155//962 1156//963 1153//959 1151//958
f 1160//964 1161//965 1159//966 1158//967
f 1164//968 1165//969 1163//970 1162//971
f 1142//951 1157//972 1158//967 1143//952
f 1158//967 1159//966 1145//953 1143//952
f 1162//971 1163//970 1156//963 1155//962
f 1135//805 1136//950 1147//955 1146//805
f 1144//954 1145//953 1155//962 1154//961
f 1144//954 1154//961 1150//957 1141//973
f 1161//965 1164//968 1162//971 1159//966
f 1138//948 1142//951 1144//954 1140//949
f 1136//950 1140//949 1144//954 1141//973
f 1147//955 1150//957 1152//960 1149//956
f 1136//950 1141//973 1150//957 1147//955
f 1159//966 1162//971 1155//962 1145//953
f 1168//974 1169//975 1167//976 1166//977
f 1172//978 1173//979 1171//980 1170//981
f 1176//982 1177//983 1175//984 1174//985
f 1180//986 1181//986 1179//986 1178//986
f 1174//985 1175//984 1169//975 1168//974
f 1178//986 1179//986 1173//979 1172//978
f 1169//975 1172//978 1170//981 1167//976
f 1177//983 1180//986 1178//986 1175//984
f 1175//984 1178//986 1172//978 1169//975
f 1184//987 1185//986 1183//988 1182//989
f 1188//986 1189//986 1187//986 1186//990
f 1192//986 1193//986 1191//986 1190//986
f 1196//986 1197//986 1195//986 1194//986
f 1190//986 1191//986 1185//986 1184//987
f 1194//986 1195//986 1189//986 1188//986
f 1185//986 1188//986 1186//990 1183//988
f 1193//986 1196//986 1194//986 1191//986
f 1191//986 1194//986 1188//986 1185//986
f 1166//977 1167//976 1126//934 1124//933
f 1170//981 1171//980 1134//944 1133//943
f 1167//976 1170//981 1133//943 1126//934
f 1182//989 1183//988 1161//965 1160//964
f 1186//990 1187//986 1165//969 1164//968
f 1183//988 1186//990 1164//968 1161//965
f 1110//805 1111//928 1138//948 1137//805
f 1131//942 1132//941 1158//967 1157//972
f 1134//944 1160//964 1158//967 1132//941
f 1111//928 1113//946 1142//951 1138//948
f 1131//942 1157//972 1142//951 1113//946
f 1173//979 1184//987 1182//989 1171//980
f 1181//986 1192//986 1190//986 1179//986
f 1179//986 1190//986 1184//987 1173//979
f 1171//980 1182//989 1160//964 1134//944
f 1198//991 1199//992 1201//993 1200//994
f 1202//995 1203//996 1201//993 1199//992
f 1206//997 1207//998 1205//999 1204//1000
f 1210//1001 1211//1002 1209//1003 1208//1004
f 1214//986 1215//986 1213//990 1212//1005
f 1208//1004 1209//1003 1203//996 1202//995
f 1212//1005 1213//990 1207//998 1206//997
f 1203//996 1206//997 1204//1000 1201//993
f 1211//1002 1214//986 1212//1005 1209//1003
f 1209//1003 1212//1005 1206//997 1203//996
f 1218//1006 1219//1007 1217//1008 1216//1009
f 1222//1002 1223//986 1221//1010 1220//1011
f 1226//986 1227//1012 1225//986 1224//986
f 1230//1013 1231//1014 1229//1015 1228//986
f 1224//986 1225//986 1219//1007 1218//1006
f 1228//986 1229//1015 1223//986 1222//1002
f 1219//1007 1222//1002 1220//1011 1217//1008
f 1227//1012 1230//1013 1228//986 1225//986
f 1225//986 1228//986 1222//1002 1219//1007
f 1234//1012 1235//1013 1233//986 1232//986
f 1238//1014 1239//1016 1237//1017 1236//1015
f 1242//1018 1243//1019 1241//1020 1240//1021
f 1246//1022 1247//1023 1245//1024 1244//1025
f 1240//1021 1241//1020 1235//1013 1234//1012
f 1244//1025 1245//1024 1239//1016 1238//1014
f 1235//1013 1238//1014 1236//1015 1233//986
f 1243//1019 1246//1022 1244//1025 1241//1020
f 1241//1020 1244//1025 1238//1014 1235//1013
f 1250//1026 1251//1027 1249//1028 1248//1029
f 1254//1030 1255//1031 1253//1032 1252//1033
f 1258//1034 1261//1035 1260//1036 1257//1037
f 1259//1038 1261//1035 1258//1034 1256//1039
f 1264//1040 1267//1041 1266//1042 1263//1043
f 1265//1044 1267//1041 1264//1040 1262//1045
f 1270//1046 1271//1047 1269//1048 1268//1049
f 1272//1050 1273//1051 1275//1052 1274//1053
f 1256//1039 1258//1034 1251//1027 1250//1026
f 1269//1048 1271//1047 1255//1031 1254//1030
f 1251//1027 1254//1030 1252//1033 1249//1028
f 1268//1049 1269//1048 1258//1034 1257//1037
f 1260//1036 1261//1035 1273//1051 1272//1050
f 1260//1036 1272//1050 1268//1049 1257//1037
f 1264//1040 1270//1046 1268//1049 1262//1045
f 1265//1044 1272//1050 1274//1053 1267//1041
f 1268//1049 1272//1050 1265//1044 1262//1045
f 1258//1034 1269//1048 1254//1030 1251//1027
f 1232//986 1233//986 1211//1002 1210//1001
f 1236//1015 1237//1017 1215//986 1214//986
f 1233//986 1236//1015 1214//986 1211//1002
f 1248//1029 1249//1028 1227//1012 1226//986
f 1252//1033 1253//1032 1231//1014 1230//1013
f 1249//1028 1252//1033 1230//1013 1227//1012
f 1207//998 1218//1006 1216//1009 1205//999
f 1215//986 1226//986 1224//986 1213//990
f 1213//990 1224//986 1218//1006 1207//998
f 1239//1016 1250//1026 1248//1029 1237//1017
f 1247//1023 1259//1038 1256//1039 1245//1024
f 1245//1024 1256//1039 1250//1026 1239//1016
f 1237//1017 1248//1029 1226//986 1215//986
f 1278//1054 1279//1055 1277//1056 1276//1057
f 1282//1058 1283//1059 1281//1060 1280//1061
f 1287//1062 1288//1063 1286//1064 1285//1065
f 1291//1066 1292//1067 1290//1068 1289//1069
f 1291//1066 1294//1070 1295//1071 1292//1067
f 1293//1072 1294//1070 1291//1066 1289//1069
f 1302//1073 1303//1074 1301//1075 1300//1076
f 1301//1075 1303//1074 1299//1077 1298//1078
f 1290//1068 1292//1067 1279//1055 1278//1054
f 1298//1078 1299//1077 1283//1059 1282//1058
f 1296//898 1297//1079 1288//1063 1287//1062
f 1279//1055 1282//1058 1280//1061 1277//1056
f 1300//1076 1301//1075 1295//1071 1294//1070
f 1295//1071 1301//1075 1298//1078 1292//1067
f 1288//1063 1294//1070 1293//1072 1286//1064
f 1284//1080 1286//1064 1293//1072 1289//1069
f 1297//1079 1300//1076 1294//1070 1288//1063
f 1292//1067 1298//1078 1282//1058 1279//1055
f 1306//1081 1307//1082 1305//986 1304//1083
f 1310//1084 1311//986 1309//986 1308//986
f 1314//1085 1315//1086 1313//1087 1312//1088
f 1318//1089 1319//1090 1317//1091 1316//1092
f 1312//1088 1313//1087 1307//1082 1306//1081
f 1316//1092 1317//1091 1311//986 1310//1084
f 1307//1082 1310//1084 1308//986 1305//986
f 1315//1086 1318//1089 1316//1092 1313//1087
f 1313//1087 1316//1092 1310//1084 1307//1082
f 1322//1093 1323//1094 1321//1095 1320//898
f 1323//1094 1325//1096 1324//1097 1321//1095
f 1332//1098 1333//1099 1331//1100 1330//1101
f 1327//1102 1330//1101 1331//1100 1328//1103
f 1331//1100 1333//1099 1329//1104 1328//1103
f 1336//1105 1337//1106 1335//1107 1334//1108
f 1341//898 1342//1109 1340//1110 1339//1111
f 1348//1112 1349//1113 1347//1114 1346//1115
f 1343//1116 1346//1115 1347//1114 1344//1117
f 1347//1114 1349//1113 1345//1118 1344//1117
f 1341//898 1350//898 1351//1119 1342//1109
f 1339//1111 1340//1110 1333//1099 1332//1098
f 1343//1116 1344//1117 1337//1106 1336//1105
f 1338//1120 1346//1115 1343//1116 1336//1105
f 1329//1104 1336//1105 1334//1108 1328//1103
f 1329//1104 1333//1099 1338//1120 1336//1105
f 1342//1109 1348//1112 1346//1115 1340//1110
f 1340//1110 1346//1115 1338//1120 1333//1099
f 1342//1109 1351//1119 1352//1121 1348//1112
f 1296//898 1320//898 1321//1095 1297//1079
f 1302//1073 1325//1096 1326//1122 1303//1074
f 1324//1097 1325//1096 1302//1073 1300//1076
f 1297//1079 1321//1095 1324//1097 1300//1076
f 1335//1107 1337//1106 1315//1086 1314//1085
f 1344//1117 1345//1118 1319//1090 1318//1089
f 1337//1106 1344//1117 1318//1089 1315//1086
f 1283//1059 1306//1081 1304//1083 1281//1060
f 1303//1074 1314//1085 1312//1088 1299//1077
f 1299//1077 1312//1088 1306//1081 1283//1059
f 1327//1102 1328//1103 1323//1094 1322//1093
f 1334//1108 1335//1107 1326//1122 1325//1096
f 1328//1103 1334//1108 1325//1096 1323//1094
f 1326//1122 1335//1107 1314//1085 1303//1074
f 1355//986 1356//986 1354//1123 1353//1124
f 1359//1125 1360//1126 1358//1127 1357//1128
f 1363//1129 1364//1130 1362//1131 1361//1132
f 1367//1133 1368//1134 1366//986 1365//986
f 1361//1132 1362//1131 1356//986 1355//986
f 1365//986 1366//986 1360//1126 1359//1125
f 1356//986 1359//1125 1357//1128 1354//1123
f 1364//1130 1367//1133 1365//986 1362//1131
f 1362//1131 1365//986 1359//1125 1356//986
f 1371//1135 1372//1136 1370//1137 1369//1138
f 1376//1139 1377//1140 1375//1141 1373//1142
f 1380//986 1381//986 1379//1143 1378//1144
f 1384//986 1385//1125 1383//1145 1382//1146
f 1378//1144 1379//1143 1372//1136 1371//1135
f 1382//1146 1383//1145 1377//1140 1376//1139
f 1372//1136 1376//1139 1373//1142 1370//1137
f 1381//986 1384//986 1382//1146 1379//1143
f 1379//1143 1382//1146 1376//1139 1372//1136
f 1389//1147 1390//1148 1387//1149 1386//1150
f 1393//1151 1394//1152 1392//1153 1391//1154
f 1397//1155 1398//1156 1396//1157 1395//1158
f 1397//1155 1399//1159 1400//1160 1398//1156
f 1403//1161 1404//1162 1402//1163 1401//1164
f 1408//1165 1409//1166 1407//1167 1406//1168
f 1412//1169 1413//1170 1411//1171 1410//1172
f 1412//1169 1415//1173 1416//1174 1413//1170
f 1414//1175 1415//1173 1412//1169 1410//1172
f 1388//1176 1401//1164 1402//1163 1389//1147
f 1402//1163 1404//1162 1390//1148 1389//1147
f 1411//1171 1413//1170 1394//1152 1393//1151
f 1406//1168 1407//1167 1400//1160 1399//1159
f 1400//1160 1407//1167 1405//1177 1398//1156
f 1390//1148 1393//1151 1391//1154 1387//1149
f 1410//1172 1411//1171 1404//1162 1403//1161
f 1398//1156 1403//1161 1401//1164 1396//1157
f 1409//1166 1415//1173 1414//1175 1407//1167
f 1405//1177 1407//1167 1414//1175 1410//1172
f 1405//1177 1410//1172 1403//1161 1398//1156
f 1404//1162 1411//1171 1393//1151 1390//1148
f 1419//1178 1420//1179 1418//1180 1417//1181
f 1423//1182 1424//1183 1422//986 1421//1184
f 1431//1185 1432//1186 1430//1187 1429//1188
f 1430//1187 1432//1186 1428//1189 1427//1190
f 1435//1191 1436//1192 1434//1193 1433//1194
f 1427//1190 1428//1189 1420//1179 1419//1178
f 1433//1194 1434//1193 1424//1183 1423//1182
f 1420//1179 1423//1182 1421//1184 1418//1180
f 1432//1186 1435//1191 1433//1194 1428//1189
f 1428//1189 1433//1194 1423//1182 1420//1179
f 1386//1150 1387//1149 1364//1130 1363//1129
f 1391//1154 1392//1153 1368//1134 1367//1133
f 1387//1149 1391//1154 1367//1133 1364//1130
f 1417//1181 1418//1180 1381//986 1380//986
f 1421//1184 1422//986 1385//1125 1384//986
f 1418//1180 1421//1184 1384//986 1381//986
f 1360//1126 1371//1135 1369//1138 1358//1127
f 1368//1134 1380//986 1378//1144 1366//986
f 1366//986 1378//1144 1371//1135 1360//1126
f 1425//898 1426//1195 1409//1166 1408//1165
f 1394//1152 1419//1178 1417//1181 1392//1153
f 1429//1188 1430//1187 1416//1174 1415//1173
f 1416//1174 1430//1187 1427//1190 1413//1170
f 1426//1195 1429//1188 1415//1173 1409//1166
f 1413//1170 1427//1190 1419//1178 1394//1152
f 1392//1153 1417//1181 1380//986 1368//1134
f 1276//1057 1277//1056 1177//983 1176//982
f 1280//1061 1281//1060 1181//986 1180//986
f 1277//1056 1280//1061 1180//986 1177//983
f 1304//1083 1305//986 1193//986 1192//986
f 1308//986 1309//986 1197//986 1196//986
f 1305//986 1308//986 1196//986 1193//986
f 1281//1060 1304//1083 1192//986 1181//986
f 1353//1124 1354//1123 1243//1019 1242//1018
f 1357//1128 1358//1127 1247//1023 1246//1022
f 1354//1123 1357//1128 1246//1022 1243//1019
f 1369//1138 1370//1137 1261//1035 1259//1038
f 1275//1052 1375//1141 1374//1196 1274//1053
f 1373//1142 1375//1141 1275//1052 1273//1051
f 1370//1137 1373//1142 1273//1051 1261//1035
f 1358//1127 1369//1138 1259//1038 1247//1023
f 1152//960 1153//959 1199//992 1198//991
f 1156//963 1202//995 1199//992 1153//959
f 1165//969 1210//1001 1208//1004 1163//970
f 1163//970 1208//1004 1202//995 1156//963
f 1189//986 1234//1012 1232//986 1187//986
f 1197//986 1242//1018 1240//1021 1195//986
f 1195//986 1240//1021 1234//1012 1189//986
f 1187//986 1232//986 1210//1001 1165//969
f 1311//986 1355//986 1353//1124 1309//986
f 1319//1090 1363//1129 1361//1132 1317//1091
f 1317//1091 1361//1132 1355//986 1311//986
f 1395//1158 1396//1157 1351//1119 1350//898
f 1388//1176 1389//1147 1349//1113 1348//1112
f 1349//1113 1389//1147 1386//1150 1345//1118
f 1396//1157 1401//1164 1352//1121 1351//1119
f 1352//1121 1401//1164 1388//1176 1348//1112
f 1345//1118 1386//1150 1363//1129 1319//1090
f 1309//986 1353//1124 1242//1018 1197//986
f 1437//1197 1439//1198 1440//1199 1438//1200
f 1441//1201 1443//1202 1444//1203 1442//1204
f 1438//1200 1440//1199 1443//1202 1441//1201
f 1445//1205 1446//1206 1448//1207 1447//1205
f 1452//1205 1453//1208 1455//1209 1454//1205
f 1452//1205 1456//1205 1457//1210 1453//1208
f 1460//1211 1461//1212 1463//1213 1462//1214
f 1460//1211 1462//1214 1459//1215 1458//1216
f 1466//1217 1467//1218 1469//1219 1468//1220
f 1470//1221 1471//1222 1469//1219 1467//1218
f 1474//1223 1475//1224 1473//1225 1472//1226
f 1445//1205 1464//1227 1465//1228 1446//1206
f 1450//1229 1468//1220 1469//1219 1451//1230
f 1466//1217 1468//1220 1450//1229 1449//1231
f 1472//1226 1473//1225 1463//1213 1461//1212
f 1447//1205 1448//1207 1457//1210 1456//1205
f 1450//1229 1451//1230 1461//1212 1460//1211
f 1471//1222 1474//1223 1472//1226 1469//1219
f 1446//1206 1449//1231 1450//1229 1448//1207
f 1453//1208 1458//1216 1459//1215 1455//1209
f 1453//1208 1457//1210 1460//1211 1458//1216
f 1448//1207 1450//1229 1460//1211 1457//1210
f 1446//1206 1465//1228 1466//1217 1449//1231
f 1469//1219 1472//1226 1461//1212 1451//1230
f 1437//1197 1438//1200 1465//1228 1464//1227
f 1441//1201 1442//1204 1467//1218 1466//1217
f 1444//1203 1470//1221 1467//1218 1442//1204
f 1438//1200 1441//1201 1466//1217 1465//1228
f 1478//898 1479//1232 1477//1233 1476//898
f 1487//898 1488//1234 1486//1235 1485//898
f 1483//898 1485//898 1486//1235 1484//1236
f 1491//1237 1492//1238 1490//1239 1489//1240
f 1493//1241 1494//1242 1491//1237 1489//1240
f 1483//898 1484//1236 1479//1232 1478//898
f 1489//1240 1490//1239 1482//1243 1481//1244
f 1479//1232 1481//1244 1480//1245 1477//1233
f 1488//1234 1494//1242 1493//1241 1486//1235
f 1484//1236 1486//1235 1493//1241 1489//1240
f 1484//1236 1489//1240 1481//1244 1479//1232
f 1500//1205 1501//1246 1503//1247 1502//1248
f 1498//1248 1502//1248 1503//1247 1499//1249
f 1505//1250 1506//1251 1508//1252 1507//1253
f 1509//1248 1510//1254 1512//1255 1511//1248
f 1516//1256 1517//1257 1519//1258 1518//1259
f 1514//1260 1518//1259 1519//1258 1515//1261
f 1516//1256 1518//1259 1514//1260 1513//1262
f 1498//1248 1499//1249 1510//1254 1509//1248
f 1507//1253 1508//1252 1517//1257 1516//1256
f 1507//1253 1516//1256 1513//1262 1504//1263
f 1501//1246 1505//1250 1507//1253 1503//1247
f 1499//1249 1503//1247 1507//1253 1504//1263
f 1510//1254 1513//1262 1514//1260 1512//1255
f 1499//1249 1504//1263 1513//1262 1510//1254
f 1495//1205 1496//1264 1501//1246 1500//1205
f 1496//1264 1497//1265 1505//1250 1501//1246
f 1525//1205 1526//1266 1528//1267 1527//1205
f 1523//1205 1527//1205 1528//1267 1524//1268
f 1530//1269 1531//1270 1533//1271 1532//1272
f 1520//1205 1521//1273 1526//1266 1525//1205
f 1526//1266 1530//1269 1532//1272 1528//1267
f 1524//1268 1528//1267 1532//1272 1529//1274
f 1521//1273 1522//1275 1530//1269 1526//1266
f 1534//1205 1535//1276 1537//1277 1536//1205
f 1541//1205 1542//1278 1544//1279 1543//1205
f 1548//1280 1549//1281 1551//1282 1550//1283
f 1546//1284 1550//1283 1551//1282 1547//1285
f 1548//1280 1550//1283 1546//1284 1545//1286
f 1554//1287 1555//1288 1557//1289 1556//1290
f 1558//1291 1559//1292 1557//1289 1555//1288
f 1534//1205 1552//1205 1553//1293 1535//1276
f 1539//1294 1556//1290 1557//1289 1540//1295
f 1554//1287 1556//1290 1539//1294 1538//1296
f 1543//1205 1544//1279 1553//1293 1552//1205
f 1546//1284 1547//1285 1555//1288 1554//1287
f 1551//1282 1558//1291 1555//1288 1547//1285
f 1535//1276 1538//1296 1539//1294 1537//1277
f 1542//1278 1545//1286 1546//1284 1544//1279
f 1544//1279 1546//1284 1554//1287 1553//1293
f 1535//1276 1553//1293 1554//1287 1538//1296
f 1560//1205 1561//1297 1563//1298 1562//1205
f 1564//1299 1565//1300 1567//1301 1566//1302
f 1564//1299 1568//1303 1569//1304 1565//1300
f 1569//1304 1570//1305 1567//1301 1565//1300
f 1574//1306 1575//1307 1573//1308 1572//1309
f 1578//1310 1579//1311 1577//1312 1576//1313
f 1582//1314 1583//986 1581//1315 1580//1316
f 1576//1313 1577//1312 1570//1305 1569//1304
f 1580//1316 1581//1315 1575//1307 1574//1306
f 1566//1302 1567//1301 1572//1309 1571//1317
f 1570//1305 1574//1306 1572//1309 1567//1301
f 1579//1311 1582//1314 1580//1316 1577//1312
f 1561//1297 1564//1299 1566//1302 1563//1298
f 1577//1312 1580//1316 1574//1306 1570//1305
f 1586//1318 1587//1319 1585//1320 1584//1321
f 1590//1005 1591//990 1589//1322 1588//1323
f 1594//986 1595//986 1593//987 1592//1324
f 1598//986 1599//986 1597//986 1596//986
f 1592//1324 1593//987 1587//1319 1586//1318
f 1596//986 1597//986 1591//990 1590//1005
f 1587//1319 1590//1005 1588//1323 1585//1320
f 1595//986 1598//986 1596//986 1593//987
f 1593//987 1596//986 1590//1005 1587//1319
f 1520//1205 1562//1205 1563//1298 1521//1273
f 1530//1269 1571//1317 1572//1309 1531//1270
f 1572//1309 1573//1308 1533//1271 1531//1270
f 1521//1273 1563//1298 1566//1302 1522//1275
f 1566//1302 1571//1317 1530//1269 1522//1275
f 1584//1321 1585//1320 1551//1282 1549//1281
f 1588//1323 1589//1322 1559//1292 1558//1291
f 1585//1320 1588//1323 1558//1291 1551//1282
f 1523//1205 1524//1268 1542//1278 1541//1205
f 1532//1272 1533//1271 1549//1281 1548//1280
f 1532//1272 1548//1280 1545//1286 1529//1274
f 1524//1268 1529//1274 1545//1286 1542//1278
f 1575//1307 1586//1318 1584//1321 1573//1308
f 1583//986 1594//986 1592//1324 1581//1315
f 1581//1315 1592//1324 1586//1318 1575//1307
f 1573//1308 1584//1321 1549//1281 1533//1271
f 1600//1205 1601//1325 1603//1326 1602//1205
f 1600//1205 1604//1205 1605//1327 1601//1325
f 1608//1328 1609//1329 1611//1330 1610//1331
f 1608//1328 1610//1331 1607//1332 1606//1333
f 1612//1205 1613//1334 1615//1335 1614//1205
f 1616//1336 1617//1337 1619//1338 1618//1339
f 1616//1336 1620//1340 1621//1341 1617//1337
f 1621//1341 1622//1342 1619//1338 1617//1337
f 1625//1343 1626//1344 1624//1345 1623//1346
f 1629//1347 1630//1348 1628//1349 1627//1350
f 1623//1346 1624//1345 1611//1330 1609//1329
f 1627//1350 1628//1349 1622//1342 1621//1341
f 1602//1205 1603//1326 1613//1334 1612//1205
f 1610//1331 1611//1330 1621//1341 1620//1340
f 1610//1331 1620//1340 1616//1336 1607//1332
f 1626//1344 1629//1347 1627//1350 1624//1345
f 1601//1325 1606//1333 1607//1332 1603//1326
f 1601//1325 1605//1327 1608//1328 1606//1333
f 1613//1334 1616//1336 1618//1339 1615//1335
f 1603//1326 1607//1332 1616//1336 1613//1334
f 1624//1345 1627//1350 1621//1341 1611//1330
f 1634//1351 1635//1352 1633//1353 1632//1354
f 1638//1355 1639//1356 1637//1357 1636//1358
f 1642//990 1643//986 1641//1359 1640//1360
f 1646//986 1647//986 1645//1002 1644//1361
f 1640//1360 1641//1359 1635//1352 1634//1351
f 1644//1361 1645//1002 1639//1356 1638//1355
f 1635//1352 1638//1355 1636//1358 1633//1353
f 1643//986 1646//986 1644//1361 1641//1359
f 1641//1359 1644//1361 1638//1355 1635//1352
f 1650//986 1651//986 1649//1362 1648//1363
f 1654//986 1655//986 1653//986 1652//1002
f 1658//1364 1659//1365 1657//1366 1656//986
f 1662//1367 1663//1368 1661//1369 1660//1370
f 1656//986 1657//1366 1651//986 1650//986
f 1660//1370 1661//1369 1655//986 1654//986
f 1651//986 1654//986 1652//1002 1649//1362
f 1659//1365 1662//1367 1660//1370 1657//1366
f 1657//1366 1660//1370 1654//986 1651//986
f 1666//1371 1667//1372 1665//986 1664//986
f 1670//1373 1671//1374 1669//1375 1668//1376
f 1674//1377 1675//1378 1673//1379 1672//1380
f 1680//1381 1681//1382 1679//1383 1678//1384
f 1679//1383 1681//1382 1677//1385 1676//1386
f 1672//1380 1673//1379 1667//1372 1666//1371
f 1676//1386 1677//1385 1671//1374 1670//1373
f 1667//1372 1670//1373 1668//1376 1665//986
f 1675//1378 1679//1383 1676//1386 1673//1379
f 1673//1379 1676//1386 1670//1373 1667//1372
f 1648//1363 1649//1362 1626//1344 1625//1343
f 1652//1002 1653//986 1630//1348 1629//1347
f 1649//1362 1652//1002 1629//1347 1626//1344
f 1664//986 1665//986 1643//986 1642//990
f 1668//1376 1669//1375 1647//986 1646//986
f 1665//986 1668//1376 1646//986 1643//986
f 1618//1339 1619//1338 1632//1354 1631//1387
f 1622//1342 1634//1351 1632//1354 1619//1338
f 1630//1348 1642//990 1640//1360 1628//1349
f 1628//1349 1640//1360 1634//1351 1622//1342
f 1655//986 1666//1371 1664//986 1653//986
f 1663//1368 1674//1377 1672//1380 1661//1369
f 1661//1369 1672//1380 1666//1371 1655//986
f 1653//986 1664//986 1642//990 1630//1348
f 1495//1205 1614//1205 1615//1335 1496//1264
f 1496//1264 1615//1335 1618//1339 1497//1265
f 1505//1250 1631//1387 1632//1354 1506//1251
f 1632//1354 1633//1353 1508//1252 1506//1251
f 1636//1358 1637//1357 1519//1258 1517//1257
f 1633//1353 1636//1358 1517//1257 1508//1252
f 1618//1339 1631//1387 1505//1250 1497//1265
f 1536//1205 1537//1277 1605//1327 1604//1205
f 1539//1294 1540//1295 1609//1329 1608//1328
f 1559//1292 1625//1343 1623//1346 1557//1289
f 1537//1277 1539//1294 1608//1328 1605//1327
f 1557//1289 1623//1346 1609//1329 1540//1295
f 1591//990 1650//986 1648//1363 1589//1322
f 1599//986 1658//1364 1656//986 1597//986
f 1597//986 1656//986 1650//986 1591//990
f 1589//1322 1648//1363 1625//1343 1559//1292
f 1425//898 1476//898 1477//1233 1426//1195
f 1431//1185 1481//1244 1482//1243 1432//1186
f 1480//1245 1481//1244 1431//1185 1429//1188
f 1490//1239 1492//1238 1436//1192 1435//1191
f 1426//1195 1477//1233 1480//1245 1429//1188
f 1482//1243 1490//1239 1435//1191 1432//1186
f 1027//805 1028//848 1119//931 1118//805
f 1030//851 1031//891 1124//933 1123//932
f 1028//848 1030//851 1123//932 1119//931
f 1063//882 1168//974 1166//977 1061//879
f 1071//888 1176//982 1174//985 1069//889
f 1069//889 1174//985 1168//974 1063//882
f 1061//879 1166//977 1124//933 1031//891
f 1285//1065 1286//1064 1103//918 1102//917
f 1103//918 1286//1064 1284//1080 1101//914
f 1094//910 1278//1054 1276//1057 1091//911
f 1289//1069 1290//1068 1107//920 1106//919
f 1284//1080 1289//1069 1106//919 1101//914
f 1107//920 1290//1068 1278//1054 1094//910
f 1091//911 1276//1057 1176//982 1071//888
f 1454//1205 1455//1209 1561//1297 1560//1205
f 1462//1214 1463//1213 1569//1304 1568//1303
f 1462//1214 1568//1303 1564//1299 1459//1215
f 1475//1224 1578//1310 1576//1313 1473//1225
f 1455//1209 1459//1215 1564//1299 1561//1297
f 1473//1225 1576//1313 1569//1304 1463//1213
f 969//805 1148//805 1149//956 970//845
f 970//845 1149//956 1152//960 971//846
f 977//818 1200//994 1201//993 978//819
f 1198//991 1200//994 977//818 976//820
f 1204//1000 1205//999 991//813 989//812
f 1201//993 1204//1000 989//812 978//819
f 1216//1009 1217//1008 1016//835 1015//834
f 1220//1011 1221//1010 1021//837 1020//836
f 1217//1008 1220//1011 1020//836 1016//835
f 1205//999 1216//1009 1015//834 991//813
f 1152//960 1198//991 976//820 971//846
f 1682//1388 1684//1389 1685//1390 1683//1391
f 1686//1392 1688//1393 1689//1394 1687//1395
f 1684//1389 1690//1396 1691//1397 1685//1390
f 1688//1393 1692//1398 1693//1399 1689//1394
f 1683//1391 1685//1390 1688//1393 1686//1392
f 1685//1390 1691//1397 1692//1398 1688//1393
f 1696//1400 1697//1401 1695//1402 1694//1403
f 1700//1404 1701//1405 1699//1406 1698//1407
f 1706//1408 1707//1409 1705//1410 1704//1411
f 1702//1412 1704//1411 1705//1410 1703//1413
f 1710//1414 1711//1415 1709//1416 1708//1417
f 1710//1414 1713//1418 1714//1419 1711//1415
f 1712//1420 1713//1418 1710//1414 1708//1417
f 1722//1421 1723//1422 1721//1423 1720//1424
f 1721//1423 1723//1422 1719//1425 1718//1426
f 1709//1416 1711//1415 1697//1401 1696//1400
f 1718//1426 1719//1425 1701//1405 1700//1404
f 1715//1427 1716//1428 1707//1409 1706//1408
f 1697//1401 1700//1404 1698//1407 1695//1402
f 1720//1424 1721//1423 1714//1419 1713//1418
f 1714//1419 1721//1423 1718//1426 1711//1415
f 1707//1409 1713//1418 1712//1420 1705//1410
f 1703//1413 1705//1410 1712//1420 1708//1417
f 1717//1429 1722//1421 1720//1424 1716//1428
f 1716//1428 1720//1424 1713//1418 1707//1409
f 1711//1415 1718//1426 1700//1404 1697//1401
f 1726//1430 1727//1431 1725//1432 1724//1433
f 1715//1427 1724//1433 1725//1432 1716//1428
f 1725//1432 1727//1431 1717//1429 1716//1428
f 1717//1429 1727//1431 1728//1434 1722//1421
f 1702//1412 1703//1413 1691//1397 1690//1396
f 1689//1394 1696//1400 1694//1403 1687//1395
f 1708//1417 1709//1416 1693//1399 1692//1398
f 1703//1413 1708//1417 1692//1398 1691//1397
f 1693//1399 1709//1416 1696//1400 1689//1394
f 1731//1435 1732//1436 1730//986 1729//1437
f 1735//1438 1736//1083 1734//986 1733//986
f 1740//1439 1741//1440 1738//1441 1737//1442
f 1744//1443 1745//1444 1743//1445 1742//1446
f 1737//1442 1738//1441 1732//1436 1731//1435
f 1742//1446 1743//1445 1736//1083 1735//1438
f 1732//1436 1735//1438 1733//986 1730//986
f 1741//1440 1744//1443 1742//1446 1738//1441
f 1738//1441 1742//1446 1735//1438 1732//1436
f 1748//986 1749//986 1747//986 1746//986
f 1752//986 1753//986 1751//986 1750//986
f 1756//1447 1757//1448 1755//983 1754//1449
f 1760//1450 1761//1451 1759//986 1758//986
f 1754//1449 1755//983 1749//986 1748//986
f 1758//986 1759//986 1753//986 1752//986
f 1749//986 1752//986 1750//986 1747//986
f 1757//1448 1760//1450 1758//986 1755//983
f 1755//983 1758//986 1752//986 1749//986
f 1764//1411 1765//1452 1763//1453 1762//1454
f 1764//1411 1766//1411 1767//1455 1765//1452
f 1770//1456 1771//1457 1769//1458 1768//1459
f 1775//1460 1776//1461 1774//1462 1773//1463
f 1782//1464 1783//1465 1781//1466 1780//1467
f 1777//1468 1780//1467 1781//1466 1778//1469
f 1781//1466 1783//1465 1779//1470 1778//1469
f 1775//1460 1784//1471 1785//1472 1776//1461
f 1773//1463 1774//1462 1767//1455 1766//1411
f 1777//1468 1778//1469 1771//1457 1770//1456
f 1772//1473 1780//1467 1777//1468 1770//1456
f 1765//1452 1770//1456 1768//1459 1763//1453
f 1765//1452 1767//1455 1772//1473 1770//1456
f 1776//1461 1782//1464 1780//1467 1774//1462
f 1774//1462 1780//1467 1772//1473 1767//1455
f 1791//1474 1792//1475 1790//1476 1789//1477
f 1790//1476 1792//1475 1788//1478 1787//1479
f 1795//1480 1796//1481 1794//1482 1793//1483
f 1799//1484 1800//1485 1798//1486 1797//1487
f 1808//1488 1809//1489 1807//1490 1806//1411
f 1804//1411 1806//1411 1807//1490 1805//1491
f 1812//1492 1813//1493 1811//1494 1810//1495
f 1812//1492 1815//1496 1816//1497 1813//1493
f 1814//1498 1815//1496 1812//1492 1810//1495
f 1791//1474 1802//1499 1803//1500 1792//1475
f 1801//1501 1802//1499 1791//1474 1789//1477
f 1811//1494 1813//1493 1796//1481 1795//1480
f 1804//1411 1805//1491 1800//1485 1799//1484
f 1792//1475 1795//1480 1793//1483 1788//1478
f 1810//1495 1811//1494 1803//1500 1802//1499
f 1800//1485 1802//1499 1801//1501 1798//1486
f 1809//1489 1815//1496 1814//1498 1807//1490
f 1805//1491 1807//1490 1814//1498 1810//1495
f 1805//1491 1810//1495 1802//1499 1800//1485
f 1786//1502 1798//1486 1801//1501 1789//1477
f 1803//1500 1811//1494 1795//1480 1792//1475
f 1739//1503 1768//1459 1769//1458 1740//1439
f 1769//1458 1771//1457 1741//1440 1740//1439
f 1778//1469 1779//1470 1745//1444 1744//1443
f 1771//1457 1778//1469 1744//1443 1741//1440
f 1787//1479 1788//1478 1757//1448 1756//1447
f 1793//1483 1794//1482 1761//1451 1760//1450
f 1788//1478 1793//1483 1760//1450 1757//1448
f 1736//1083 1748//986 1746//986 1734//986
f 1745//1444 1756//1447 1754//1449 1743//1445
f 1743//1445 1754//1449 1748//986 1736//1083
f 1797//1487 1798//1486 1785//1472 1784//1471
f 1789//1477 1790//1476 1783//1465 1782//1464
f 1783//1465 1790//1476 1787//1479 1779//1470
f 1786//1502 1789//1477 1782//1464 1776//1461
f 1785//1472 1798//1486 1786//1502 1776//1461
f 1779//1470 1787//1479 1756//1447 1745//1444
f 1819//1504 1820//1505 1818//1506 1817//1507
f 1823//1508 1824//1509 1822//1510 1821//1511
f 1827//1083 1828//986 1826//1512 1825//1513
f 1831//986 1832//1514 1830//1515 1829//1516
f 1825//1513 1826//1512 1820//1505 1819//1504
f 1829//1516 1830//1515 1824//1509 1823//1508
f 1820//1505 1823//1508 1821//1511 1818//1506
f 1828//986 1831//986 1829//1516 1826//1512
f 1826//1512 1829//1516 1823//1508 1820//1505
f 1835//1517 1836//1518 1834//1519 1833//1520
f 1838//1521 1840//1522 1839//1523 1837//1524
f 1844//1525 1845//1526 1847//1527 1846//1528
f 1842//1529 1845//1526 1844//1525 1841//1530
f 1844//1525 1846//1528 1843//1531 1841//1530
f 1850//1532 1851//1533 1849//1534 1848//1535
f 1854//1536 1855//1537 1853//1538 1852//1539
f 1848//1535 1849//1534 1836//1518 1835//1517
f 1852//1539 1853//1538 1847//1527 1845//1526
f 1836//1518 1845//1526 1842//1529 1834//1519
f 1851//1533 1854//1536 1852//1539 1849//1534
f 1843//1531 1846//1528 1840//1522 1838//1521
f 1849//1534 1852//1539 1845//1526 1836//1518
f 1858//1540 1859//1541 1857//1542 1856//1543
f 1862//1544 1863//1545 1861//986 1860//1546
f 1871//1547 1872//1548 1870//1549 1869//1550
f 1870//1549 1872//1548 1868//1551 1867//1552
f 1876//1553 1877//1554 1874//1555 1873//1556
f 1867//1552 1868//1551 1859//1541 1858//1540
f 1873//1556 1874//1555 1863//1545 1862//1544
f 1859//1541 1862//1544 1860//1546 1857//1542
f 1875//1557 1876//1553 1872//1548 1871//1547
f 1872//1548 1876//1553 1873//1556 1868//1551
f 1866//1558 1871//1547 1869//1550 1865//1559
f 1868//1551 1873//1556 1862//1544 1859//1541
f 1880//1560 1881//1561 1879//986 1878//986
f 1884//986 1885//986 1883//1562 1882//1563
f 1888//1564 1889//1565 1887//1566 1886//1567
f 1892//1568 1893//1569 1891//1084 1890//1570
f 1886//1567 1887//1566 1881//1561 1880//1560
f 1890//1570 1891//1084 1885//986 1884//986
f 1881//1561 1884//986 1882//1563 1879//986
f 1889//1565 1892//1568 1890//1570 1887//1566
f 1887//1566 1890//1570 1884//986 1881//1561
f 1856//1543 1857//1542 1828//986 1827//1083
f 1860//1546 1861//986 1832//1514 1831//986
f 1857//1542 1860//1546 1831//986 1828//986
f 1878//986 1879//986 1851//1533 1850//1532
f 1882//1563 1883//1562 1855//1537 1854//1536
f 1879//986 1882//1563 1854//1536 1851//1533
f 1824//1509 1835//1517 1833//1520 1822//1510
f 1832//1514 1850//1532 1848//1535 1830//1515
f 1830//1515 1848//1535 1835//1517 1824//1509
f 1863//1545 1880//1560 1878//986 1861//986
f 1877//1554 1888//1564 1886//1567 1874//1555
f 1874//1555 1886//1567 1880//1560 1863//1545
f 1861//986 1878//986 1850//1532 1832//1514
f 1896//1571 1897//1572 1895//1573 1894//1574
f 1901//1411 1902//1575 1900//1576 1899//1577
f 1901//1411 1903//1411 1904//1578 1902//1575
f 1907//1579 1908//1580 1906//1581 1905//1582
f 1899//1577 1900//1576 1897//1572 1896//1571
f 1902//1575 1907//1579 1905//1582 1900//1576
f 1902//1575 1904//1578 1909//1583 1907//1579
f 1900//1576 1905//1582 1898//1584 1897//1572
f 1912//1585 1913//1586 1911//1587 1910//1411
f 1919//1588 1920//1589 1918//1590 1917//1591
f 1914//1592 1917//1591 1918//1590 1915//1593
f 1918//1590 1920//1589 1916//1594 1915//1593
f 1926//1595 1927//1596 1925//1597 1924//1598
f 1925//1597 1927//1596 1923//1599 1922//1600
f 1932//1411 1933//1601 1931//1602 1930//1603
f 1912//1585 1928//1604 1929//1605 1913//1586
f 1926//1595 1935//1606 1936//1607 1927//1596
f 1934//1608 1935//1606 1926//1595 1924//1598
f 1930//1603 1931//1602 1929//1605 1928//1604
f 1924//1598 1925//1597 1920//1589 1919//1588
f 1920//1589 1925//1597 1922//1600 1916//1594
f 1913//1586 1919//1588 1917//1591 1911//1587
f 1933//1601 1935//1606 1934//1608 1931//1602
f 1921//1609 1924//1598 1919//1588 1913//1586
f 1921//1609 1931//1602 1934//1608 1924//1598
f 1929//1605 1931//1602 1921//1609 1913//1586
f 1910//1411 1911//1587 1904//1578 1903//1411
f 1914//1592 1915//1593 1908//1580 1907//1579
f 1909//1583 1917//1591 1914//1592 1907//1579
f 1911//1587 1917//1591 1909//1583 1904//1578
f 1864//1610 1894//1574 1895//1573 1865//1559
f 1895//1573 1897//1572 1866//1558 1865//1559
f 1875//1557 1905//1582 1906//1581 1876//1553
f 1906//1581 1908//1580 1877//1554 1876//1553
f 1866//1558 1897//1572 1898//1584 1871//1547
f 1898//1584 1905//1582 1875//1557 1871//1547
f 1915//1593 1916//1594 1889//1565 1888//1564
f 1922//1600 1923//1599 1893//1569 1892//1568
f 1916//1594 1922//1600 1892//1568 1889//1565
f 1908//1580 1915//1593 1888//1564 1877//1554
f 1753//986 1819//1504 1817//1507 1751//986
f 1761//1451 1827//1083 1825//1513 1759//986
f 1759//986 1825//1513 1819//1504 1753//986
f 1864//1610 1865//1559 1809//1489 1808//1488
f 1796//1481 1858//1540 1856//1543 1794//1482
f 1869//1550 1870//1549 1816//1497 1815//1496
f 1816//1497 1870//1549 1867//1552 1813//1493
f 1865//1559 1869//1550 1815//1496 1809//1489
f 1813//1493 1867//1552 1858//1540 1796//1481
f 1794//1482 1856//1543 1827//1083 1761//1451
f 1701//1405 1731//1435 1729//1437 1699//1406
f 1739//1503 1740//1439 1723//1422 1722//1421
f 1723//1422 1740//1439 1737//1442 1719//1425
f 1719//1425 1737//1442 1731//1435 1701//1405
f 1762//1454 1763//1453 1727//1431 1726//1430
f 1763//1453 1768//1459 1728//1434 1727//1431
f 1728//1434 1768//1459 1739//1503 1722//1421
f 1439//1198 1682//1388 1683//1391 1440//1199
f 1443//1202 1686//1392 1687//1395 1444//1203
f 1440//1199 1683//1391 1686//1392 1443//1202
f 1694//1403 1695//1402 1471//1222 1470//1221
f 1698//1407 1699//1406 1475//1224 1474//1223
f 1695//1402 1698//1407 1474//1223 1471//1222
f 1687//1395 1694//1403 1470//1221 1444//1203
f 1729//1437 1730//986 1579//1311 1578//1310
f 1733//986 1734//986 1583//986 1582//1314
f 1730//986 1733//986 1582//1314 1579//1311
f 1746//986 1747//986 1595//986 1594//986
f 1750//986 1751//986 1599//986 1598//986
f 1747//986 1750//986 1598//986 1595//986
f 1734//986 1746//986 1594//986 1583//986
f 1817//1507 1818//1506 1659//1365 1658//1364
f 1821//1511 1822//1510 1663//1368 1662//1367
f 1818//1506 1821//1511 1662//1367 1659//1365
f 1833//1520 1834//1519 1675//1378 1674//1377
f 1679//1383 1842//1529 1841//1530 1678//1384
f 1841//1530 1843//1531 1680//1381 1678//1384
f 1834//1519 1842//1529 1679//1383 1675//1378
f 1822//1510 1833//1520 1674//1377 1663//1368
f 1751//986 1817//1507 1658//1364 1599//986
f 1699//1406 1729//1437 1578//1310 1475//1224
f 1943//1611 1944//2 1946//2 1945//1612
f 1950//1613 1951//1614 1953//1615 1952//1616
f 1948//1617 1952//1616 1953//1615 1949//1618
f 1947//1619 1949//1618 1953//1615 1951//1614
f 1954//1620 1955//2 1957//2 1956//1621
f 1954//1620 1958//1622 1959//2 1955//2
f 1941//1623 1942//1624 1951//1614 1950//1613
f 1945//1612 1946//2 1959//2 1958//1622
f 1940//1625 1943//1611 1945//1612 1942//1624
f 1947//1619 1954//1620 1956//1621 1949//1618
f 1947//1619 1951//1614 1958//1622 1954//1620
f 1942//1624 1945//1612 1958//1622 1951//1614
f 1938//1626 1939//2 1944//2 1943//1611
f 1937//1627 1938//1626 1943//1611 1940//1625
f 1966//1628 1967//2 1969//2 1968//1629
f 1961//1630 1962//2 1967//2 1966//1628
f 1963//1631 1966//1628 1968//1629 1965//1632
f 1960//1633 1961//1630 1966//1628 1963//1631
f 1972//1634 1973//2 1975//2 1974//1635
f 1979//1636 1980//1637 1982//1638 1981//1639
f 1977//1640 1981//1639 1982//1638 1978//1641
f 1976//1642 1978//1641 1982//1638 1980//1637
f 1983//1643 1984//2 1986//2 1985//1644
f 1983//1643 1987//1645 1988//2 1984//2
f 1989//1646 1990//1647 1992//1648 1991//1649
f 1989//1646 1991//1649 1994//1650 1993//1651
f 1970//1652 1971//1653 1992//1648 1990//1647
f 1972//1634 1995//1654 1996//2 1973//2
f 1977//1640 1978//1641 1990//1647 1989//1646
f 1977//1640 1989//1646 1993//1651 1981//1639
f 1985//1644 1986//2 1996//2 1995//1654
f 1970//1652 1972//1634 1974//1635 1971//1653
f 1976//1642 1983//1643 1985//1644 1978//1641
f 1976//1642 1980//1637 1987//1645 1983//1643
f 1978//1641 1985//1644 1995//1654 1990//1647
f 1970//1652 1990//1647 1995//1654 1972//1634
f 1997//1655 1998//1656 2000//1657 1999//1658
f 1997//1655 2001//1659 2002//1660 1998//1656
f 1997//1655 1999//1658 2003//1661 2001//1659
f 2004//1662 2005//2 2007//2 2006//1663
f 2008//1664 2009//1665 2011//1666 2010//1667
f 2008//1664 2010//1667 2013//550 2012//1668
f 2014//1669 2015//1670 2017//1671 2016//1672
f 2018//1673 2019//1674 2021//199 2020//555
f 2001//1659 2003//1661 2015//1670 2014//1669
f 2012//1668 2013//550 2019//1674 2018//1673
f 1999//1658 2000//1657 2009//1665 2008//1664
f 1999//1658 2008//1664 2012//1668 2003//1661
f 2015//1670 2018//1673 2020//555 2017//1671
f 1998//1656 2004//1662 2006//1663 2000//1657
f 2003//1661 2012//1668 2018//1673 2015//1670
f 2022//1675 2023//1676 2025//1677 2024//1678
f 2026//1679 2027//1680 2029//1681 2028//1682
f 2030//1683 2031//1684 2033//182 2032//182
f 2034//182 2035//182 2037//208 2036//182
f 2024//1678 2025//1677 2031//1684 2030//1683
f 2028//1682 2029//1681 2035//182 2034//182
f 2023//1676 2026//1679 2028//1682 2025//1677
f 2031//1684 2034//182 2036//182 2033//182
f 2025//1677 2028//1682 2034//182 2031//1684
f 1961//1630 2006//1663 2007//2 1962//2
f 1964//1685 2010//1667 2011//1666 1965//1632
f 1963//1631 1965//1632 2011//1666 2009//1665
f 1960//1633 2000//1657 2006//1663 1961//1630
f 1960//1633 1963//1631 2009//1665 2000//1657
f 1979//1636 1981//1639 2023//1676 2022//1675
f 1993//1651 1994//1650 2027//1680 2026//1679
f 1981//1639 1993//1651 2026//1679 2023//1676
f 1964//1685 1965//1632 1980//1637 1979//1636
f 1968//1629 1969//2 1988//2 1987//1645
f 1965//1632 1968//1629 1987//1645 1980//1637
f 2010//1667 2022//1675 2024//1678 2013//550
f 2019//1674 2030//1683 2032//182 2021//199
f 2013//550 2024//1678 2030//1683 2019//1674
f 1964//1685 1979//1636 2022//1675 2010//1667
f 2039//1686 2040//1687 2042//1688 2041//1689
f 2045//1690 2046//2 2048//2 2047//1691
f 2043//1692 2047//1691 2048//2 2044//2
f 2049//1693 2050//1694 2052//1695 2051//1696
f 2049//1693 2053//1697 2054//1698 2050//1694
f 2049//1693 2051//1696 2055//1699 2053//1697
f 2056//1700 2057//2 2059//2 2058//1701
f 2060//1702 2062//1703 2064//1704 2063//1705
f 2065//1706 2066//1707 2068//1708 2067//1709
f 2039//1686 2060//1702 2061//1710 2040//1687
f 2039//1686 2041//1689 2062//1703 2060//1702
f 2053//1697 2055//1699 2066//1707 2065//1706
f 2041//1689 2042//1688 2054//1698 2053//1697
f 2038//1711 2050//1694 2054//1698 2042//1688
f 2062//1703 2065//1706 2067//1709 2064//1704
f 2043//1692 2044//2 2057//2 2056//1700
f 2040//1687 2045//1690 2047//1691 2042//1688
f 2038//1711 2042//1688 2047//1691 2043//1692
f 2050//1694 2056//1700 2058//1701 2052//1695
f 2038//1711 2043//1692 2056//1700 2050//1694
f 2041//1689 2053//1697 2065//1706 2062//1703
f 2069//1712 2070//1713 2072//1714 2071//1715
f 2069//1712 2071//1715 2074//1716 2073//1717
f 2075//1718 2076//1719 2078//1720 2077//1721
f 2079//1722 2080//1723 2082//1724 2081//1725
f 2083//1726 2084//1684 2086//182 2085//182
f 2073//1717 2074//1716 2080//1723 2079//1722
f 2077//1721 2078//1720 2084//1684 2083//1726
f 2071//1715 2075//1718 2077//1721 2074//1716
f 2080//1723 2083//1726 2085//182 2082//1724
f 2074//1716 2077//1721 2083//1726 2080//1723
f 2087//1727 2088//1728 2090//182 2089//1724
f 2091//1684 2092//182 2094//182 2093//182
f 2095//182 2096//209 2098//210 2097//211
f 2099//212 2100//222 2102//225 2101//213
f 2089//1724 2090//182 2096//209 2095//182
f 2093//182 2094//182 2100//222 2099//212
f 2088//1728 2091//1684 2093//182 2090//182
f 2096//209 2099//212 2101//213 2098//210
f 2090//182 2093//182 2099//212 2096//209
f 2103//182 2104//182 2106//211 2105//208
f 2107//209 2108//212 2110//1729 2109//210
f 2111//223 2112//226 2114//229 2113//1730
f 2115//227 2116//1731 2118//1732 2117//228
f 2105//208 2106//211 2112//226 2111//223
f 2109//210 2110//1729 2116//1731 2115//227
f 2104//182 2107//209 2109//210 2106//211
f 2112//226 2115//227 2117//228 2114//229
f 2106//211 2109//210 2115//227 2112//226
f 2063//1705 2064//1704 2088//1728 2087//1727
f 2067//1709 2068//1708 2092//182 2091//1684
f 2064//1704 2067//1709 2091//1684 2088//1728
f 2081//1725 2082//1724 2104//182 2103//182
f 2085//182 2086//182 2108//212 2107//209
f 2082//1724 2085//182 2107//209 2104//182
f 2051//1696 2052//1695 2070//1713 2069//1712
f 2051//1696 2069//1712 2073//1717 2055//1699
f 2066//1707 2079//1722 2081//1725 2068//1708
f 2055//1699 2073//1717 2079//1722 2066//1707
f 2092//182 2103//182 2105//208 2094//182
f 2100//222 2111//223 2113//1730 2102//225
f 2094//182 2105//208 2111//223 2100//222
f 2068//1708 2081//1725 2103//182 2092//182
f 1938//1626 2058//1701 2059//2 1939//2
f 1937//1627 2052//1695 2058//1701 1938//1626
f 1941//1623 2071//1715 2072//1714 1942//1624
f 1940//1625 1942//1624 2072//1714 2070//1713
f 1950//1613 1952//1616 2076//1719 2075//1718
f 1941//1623 1950//1613 2075//1718 2071//1715
f 1937//1627 1940//1625 2070//1713 2052//1695
f 1991//1649 1992//1648 2061//1710 2060//1702
f 1991//1649 2060//1702 2063//1705 1994//1650
f 1974//1635 1975//2 2046//2 2045//1690
f 1971//1653 1974//1635 2045//1690 2040//1687
f 1971//1653 2040//1687 2061//1710 1992//1648
f 2027//1680 2087//1727 2089//1724 2029//1681
f 2035//182 2095//182 2097//211 2037//208
f 2029//1681 2089//1724 2095//182 2035//182
f 1994//1650 2063//1705 2087//1727 2027//1680
f 2122//1733 2123//2 2125//2 2124//1734
f 2127//1735 2128//1736 2130//1737 2129//1738
f 2133//1739 2134//2 2136//2 2135//1740
f 2131//1741 2135//1740 2136//2 2132//1742
f 2137//1743 2138//1744 2140//1745 2139//1746
f 2137//1743 2139//1746 2142//1747 2141//1748
f 2145//1749 2147//1750 2149//1751 2148//1752
f 2120//1753 2121//1754 2140//1745 2138//1744
f 2122//1733 2143//1755 2144//2 2123//2
f 2127//1735 2145//1749 2146//1756 2128//1736
f 2127//1735 2129//1738 2147//1750 2145//1749
f 2139//1746 2140//1745 2146//1756 2145//1749
f 2139//1746 2145//1749 2148//1752 2142//1747
f 2124//1734 2125//2 2134//2 2133//1739
f 2120//1753 2122//1733 2124//1734 2121//1754
f 2128//1736 2133//1739 2135//1740 2130//1737
f 2126//1757 2130//1737 2135//1740 2131//1741
f 2121//1754 2124//1734 2133//1739 2128//1736
f 2120//1753 2138//1744 2143//1755 2122//1733
f 2121//1754 2128//1736 2146//1756 2140//1745
f 2154//1758 2156//1759 2155//1760 2153//1761
f 2158//1762 2160//1763 2159//1764 2157//1765
f 2162//1766 2164//1766 2163//1767 2161//1768
f 2152//1769 2158//1762 2157//1765 2151//1770
f 2156//1759 2162//1766 2161//1768 2155//1760
f 2153//1761 2155//1760 2152//1769 2150//1771
f 2161//1768 2163//1767 2160//1763 2158//1762
f 2155//1760 2161//1768 2158//1762 2152//1769
f 2129//1738 2130//1737 2152//1769 2151//1770
f 2126//1757 2150//1771 2152//1769 2130//1737
f 2147//1750 2157//1765 2159//1764 2149//1751
f 2131//1741 2132//1742 2154//1758 2153//1761
f 2126//1757 2131//1741 2153//1761 2150//1771
f 2129//1738 2151//1770 2157//1765 2147//1750
f 2165//1772 2166//1773 2168//1774 2167//1775
f 2169//1776 2170//1777 2172//1778 2171//1779
f 2173//182 2174//1780 2176//1780 2175//182
f 2177//1781 2178//1778 2180//1778 2179//1781
f 2167//1775 2168//1774 2174//1780 2173//182
f 2171//1779 2172//1778 2178//1778 2177//1781
f 2166//1773 2169//1776 2171//1779 2168//1774
f 2174//1780 2177//1781 2179//1781 2176//1780
f 2168//1774 2171//1779 2177//1781 2174//1780
f 2182//1763 2184//1763 2183//1782 2181//1782
f 2186//1766 2188//1766 2187//1767 2185//1767
f 2190//1763 2192//1763 2191//1782 2189//1782
f 2194//1766 2196//1766 2195//1767 2193//1767
f 2184//1763 2190//1763 2189//1782 2183//1782
f 2188//1766 2194//1766 2193//1767 2187//1767
f 2185//1767 2187//1767 2184//1763 2182//1763
f 2193//1767 2195//1767 2192//1763 2190//1763
f 2187//1767 2193//1767 2190//1763 2184//1763
f 2197//222 2198//1783 2200//1784 2199//225
f 2201//1785 2202//1786 2204//1787 2203//1788
f 2210//1789 2211//1790 2209//1791 2208//1792
f 2207//1793 2211//1790 2210//1789 2206//1794
f 2205//1795 2206//1794 2210//1789 2208//1792
f 2214//1796 2215//1797 2213//1798 2212//1799
f 2218//1800 2219//1801 2217//1802 2216//1803
f 2226//1804 2227//1805 2225//1806 2224//1807
f 2223//1808 2227//1805 2226//1804 2222//1809
f 2221//1810 2222//1809 2226//1804 2224//1807
f 2199//225 2200//1784 2206//1794 2205//1795
f 2203//1788 2204//1787 2218//1800 2216//1803
f 2198//1783 2201//1785 2203//1788 2200//1784
f 2216//1803 2217//1802 2207//1793 2206//1794
f 2207//1793 2217//1802 2220//1811 2211//1790
f 2224//1807 2225//1806 2215//1797 2214//1796
f 2211//1790 2214//1796 2212//1799 2209//1791
f 2219//1801 2222//1809 2221//1810 2217//1802
f 2221//1810 2224//1807 2220//1811 2217//1802
f 2220//1811 2224//1807 2214//1796 2211//1790
f 2200//1784 2203//1788 2216//1803 2206//1794
f 2229//1812 2231//1813 2230//1814 2228//1815
f 2233//1766 2235//1816 2234//1817 2232//1818
f 2231//1813 2237//1819 2236//1820 2230//1814
f 2235//1816 2239//1821 2238//1822 2234//1817
f 2232//1818 2234//1817 2231//1813 2229//1812
f 2234//1817 2238//1822 2237//1819 2231//1813
f 2175//182 2176//1780 2198//1783 2197//222
f 2179//1781 2180//1778 2202//1786 2201//1785
f 2176//1780 2179//1781 2201//1785 2198//1783
f 2192//1763 2229//1812 2228//1815 2191//1782
f 2196//1766 2233//1766 2232//1818 2195//1767
f 2195//1767 2232//1818 2229//1812 2192//1763
f 2170//1777 2181//1782 2183//1782 2172//1778
f 2178//1778 2189//1782 2191//1782 2180//1778
f 2172//1778 2183//1782 2189//1782 2178//1778
f 2202//1786 2228//1815 2230//1814 2204//1787
f 2236//1820 2237//1819 2219//1801 2218//1800
f 2238//1822 2239//1821 2223//1808 2222//1809
f 2237//1819 2238//1822 2222//1809 2219//1801
f 2204//1787 2230//1814 2236//1820 2218//1800
f 2180//1778 2191//1782 2228//1815 2202//1786
f 2141//1748 2142//1747 2166//1773 2165//1772
f 2148//1752 2149//1751 2170//1777 2169//1776
f 2142//1747 2148//1752 2169//1776 2166//1773
f 2160//1763 2182//1763 2181//1782 2159//1764
f 2164//1766 2186//1766 2185//1767 2163//1767
f 2163//1767 2185//1767 2182//1763 2160//1763
f 2149//1751 2159//1764 2181//1782 2170//1777
f 1948//1617 1949//1618 2138//1744 2137//1743
f 1948//1617 2137//1743 2141//1748 1952//1616
f 1956//1621 1957//2 2144//2 2143//1755
f 1949//1618 1956//1621 2143//1755 2138//1744
f 2076//1719 2165//1772 2167//1775 2078//1720
f 2084//1684 2173//182 2175//182 2086//182
f 2078//1720 2167//1775 2173//182 2084//1684
f 2108//212 2197//222 2199//225 2110//1729
f 2208//1792 2209//1791 2119//1823 2118//1732
f 2116//1731 2205//1795 2208//1792 2118//1732
f 2110//1729 2199//225 2205//1795 2116//1731
f 2086//182 2175//182 2197//222 2108//212
f 1952//1616 2141//1748 2165//1772 2076//1719
f 2240//186 2241//182 2243//182 2242//182
f 2244//182 2245//182 2247//211 2246//208
f 2248//212 2249//222 2251//225 2250//213
f 2252//223 2253//226 2255//229 2254//1730
f 2242//182 2243//182 2249//222 2248//212
f 2246//208 2247//211 2253//226 2252//223
f 2241//182 2244//182 2246//208 2243//182
f 2249//222 2252//223 2254//1730 2251//225
f 2243//182 2246//208 2252//223 2249//222
f 2256//209 2257//212 2259//1729 2258//210
f 2260//222 2261//223 2263//1730 2262//225
f 2264//227 2265//1731 2267//1732 2266//228
f 2274//1824 2275//1790 2273//1791 2272//1792
f 2271//1793 2275//1790 2274//1824 2270//1825
f 2269//1795 2270//1825 2274//1824 2272//1792
f 2278//1796 2279//1797 2277//1826 2276//1799
f 2258//210 2259//1729 2265//1731 2264//227
f 2262//225 2263//1730 2270//1825 2269//1795
f 2257//212 2260//222 2262//225 2259//1729
f 2272//1792 2273//1791 2268//1827 2267//1732
f 2265//1731 2269//1795 2272//1792 2267//1732
f 2275//1790 2278//1796 2276//1799 2273//1791
f 2259//1729 2262//225 2269//1795 2265//1731
f 2284//1828 2285//1829 2283//1827 2282//1732
f 2280//1731 2281//1795 2284//1828 2282//1732
f 2290//239 2291//1830 2289//1793 2288//1825
f 2289//1793 2293//1790 2292//1824 2288//1825
f 2289//1793 2291//1830 2294//1831 2293//1790
f 2298//1807 2299//1806 2297//1797 2296//1796
f 2306//1832 2307//1826 2305//1833 2304//1834
f 2308//1835 2309//1836 2311//1837 2310//1838
f 2283//1827 2301//1839 2300//1840 2282//1732
f 2283//1827 2285//1829 2302//1841 2301//1839
f 2287//1826 2307//1826 2306//1832 2286//1799
f 2292//1824 2293//1790 2285//1829 2284//1828
f 2281//1795 2288//1825 2292//1824 2284//1828
f 2296//1796 2297//1797 2287//1826 2286//1799
f 2294//1831 2298//1807 2296//1796 2293//1790
f 2295//1842 2298//1807 2294//1831 2291//1830
f 2302//1841 2306//1832 2304//1834 2301//1839
f 2293//1790 2296//1796 2286//1799 2285//1829
f 2286//1799 2306//1832 2302//1841 2285//1829
f 2314//1840 2315//1839 2313//237 2312//236
f 2318//1834 2319//1833 2317//1843 2316//1844
f 2317//1843 2321//1805 2320//1804 2316//1844
f 2323//1832 2324//1826 2319//1833 2318//1834
f 2315//1839 2318//1834 2316//1844 2313//237
f 2322//1841 2323//1832 2318//1834 2315//1839
f 2250//213 2251//225 2281//1795 2280//1731
f 2254//1730 2255//229 2290//239 2288//1825
f 2251//225 2254//1730 2288//1825 2281//1795
f 2268//1827 2315//1839 2314//1840 2267//1732
f 2266//228 2267//1732 2314//1840 2312//236
f 2277//1826 2324//1826 2323//1832 2276//1799
f 2276//1799 2323//1832 2322//1841 2273//1791
f 2268//1827 2273//1791 2322//1841 2315//1839
f 2245//182 2256//209 2258//210 2247//211
f 2253//226 2264//227 2266//228 2255//229
f 2247//211 2258//210 2264//227 2253//226
f 2312//236 2313//237 2291//1830 2290//239
f 2320//1804 2321//1805 2299//1806 2298//1807
f 2295//1842 2316//1844 2320//1804 2298//1807
f 2313//237 2316//1844 2295//1842 2291//1830
f 2255//229 2266//228 2312//236 2290//239
f 2325//226 2326//227 2328//228 2327//229
f 2333//1792 2334//1791 2332//1827 2331//1732
f 2329//1731 2330//1795 2333//1792 2331//1732
f 2339//236 2340//1845 2338//1802 2337//239
f 2347//1804 2348//1805 2346//1806 2345//1807
f 2344//1843 2348//1805 2347//1804 2343//1844
f 2342//1846 2343//1844 2347//1804 2345//1807
f 2354//1832 2355//1826 2353//1833 2352//1834
f 2327//229 2328//228 2339//236 2337//239
f 2332//1827 2350//1839 2349//1847 2331//1732
f 2332//1827 2334//1791 2351//1841 2350//1839
f 2336//1826 2355//1826 2354//1832 2335//1799
f 2326//227 2329//1731 2331//1732 2328//228
f 2349//1847 2350//1839 2340//1845 2339//236
f 2352//1834 2353//1833 2344//1843 2343//1844
f 2340//1845 2343//1844 2342//1846 2338//1802
f 2342//1846 2345//1807 2341//1811 2338//1802
f 2351//1841 2354//1832 2352//1834 2350//1839
f 2350//1839 2352//1834 2343//1844 2340//1845
f 2335//1799 2354//1832 2351//1841 2334//1791
f 2328//228 2331//1732 2349//1847 2339//236
f 2358//239 2359//1802 2357//1793 2356//1825
f 2357//1793 2361//1790 2360//1789 2356//1825
f 2357//1793 2359//1802 2362//1811 2361//1790
f 2366//1807 2367//1806 2365//1797 2364//1796
f 2370//1847 2371//1848 2369//1845 2368//236
f 2374//1834 2375//1833 2373//1843 2372//1844
f 2373//1843 2377//1805 2376//1804 2372//1844
f 2368//236 2369//1845 2359//1802 2358//239
f 2376//1804 2377//1805 2367//1806 2366//1807
f 2363//1846 2372//1844 2376//1804 2366//1807
f 2362//1811 2366//1807 2364//1796 2361//1790
f 2363//1846 2366//1807 2362//1811 2359//1802
f 2371//1848 2374//1834 2372//1844 2369//1845
f 2369//1845 2372//1844 2363//1846 2359//1802
f 2360//1789 2361//1790 2334//1791 2333//1792
f 2330//1795 2356//1825 2360//1789 2333//1792
f 2364//1796 2365//1797 2336//1826 2335//1799
f 2361//1790 2364//1796 2335//1799 2334//1791
f 2378//1849 2379//1850 2381//1851 2380//1852
f 2378//1849 2380//1852 2383//1853 2382//1854
f 2390//1855 2391//1856 2393//1857 2392//1858
f 2388//1859 2391//1856 2390//1855 2387//1860
f 2388//1859 2389//1861 2393//1857 2391//1856
f 2394//1862 2395//1863 2397//1864 2396//1865
f 2397//1864 2399//1864 2398//1866 2396//1865
f 2400//1867 2401//1868 2403//1869 2402//1870
f 2404//1871 2405//1872 2407//1873 2406//1874
f 2382//1854 2383//1853 2401//1868 2400//1867
f 2390//1855 2392//1858 2405//1872 2404//1871
f 2380//1852 2381//1851 2388//1859 2387//1860
f 2380//1852 2387//1860 2390//1855 2383//1853
f 2401//1868 2404//1871 2406//1874 2403//1869
f 2385//1875 2386//1876 2395//1863 2394//1862
f 2379//1850 2384//1877 2385//1875 2381//1851
f 2388//1859 2394//1862 2396//1865 2389//1861
f 2396//1865 2398//1866 2393//1857 2389//1861
f 2381//1851 2385//1875 2394//1862 2388//1859
f 2383//1853 2390//1855 2404//1871 2401//1868
f 2411//1878 2412//1879 2414//1880 2413//1881
f 2417//1882 2418//1883 2420//1884 2419//1885
f 2417//1882 2419//1885 2422//1886 2421//1887
f 2424//1888 2425//1889 2427//1890 2426//1891
f 2427//1890 2430//1892 2429//1893 2426//1891
f 2424//1888 2426//1891 2429//1893 2428//1894
f 2431//1895 2432//1896 2434//1897 2433//1898
f 2409//1899 2418//1883 2417//1882 2408//1900
f 2409//1899 2410//1901 2420//1884 2418//1883
f 2416//1902 2432//1896 2431//1895 2415//1903
f 2419//1885 2420//1884 2425//1889 2424//1888
f 2419//1885 2424//1888 2428//1894 2422//1886
f 2413//1881 2414//1880 2416//1902 2415//1903
f 2409//1899 2411//1878 2413//1881 2410//1901
f 2425//1889 2431//1895 2433//1898 2427//1890
f 2420//1884 2423//1904 2431//1895 2425//1889
f 2413//1881 2423//1904 2420//1884 2410//1901
f 2413//1881 2415//1903 2431//1895 2423//1904
f 2435//182 2436//1905 2438//182 2437//1906
f 2439//1907 2440//1908 2442//182 2441//182
f 2443//1909 2444//1910 2446//1911 2445//1912
f 2447//1913 2448//1914 2450//1915 2449//1916
f 2437//1906 2438//182 2444//1910 2443//1909
f 2441//182 2442//182 2448//1914 2447//1913
f 2436//1905 2439//1907 2441//182 2438//182
f 2444//1910 2447//1913 2449//1916 2446//1911
f 2438//182 2441//182 2447//1913 2444//1910
f 2451//1917 2452//1918 2454//1919 2453//1920
f 2455//1921 2456//1922 2458//1923 2457//1924
f 2459//182 2460//182 2462//1925 2461//1926
f 2463//1927 2464//1928 2466//182 2465//182
f 2453//1920 2454//1919 2460//182 2459//182
f 2457//1924 2458//1923 2464//1928 2463//1927
f 2452//1918 2455//1921 2457//1924 2454//1919
f 2460//182 2463//1927 2465//182 2462//1925
f 2454//1919 2457//1924 2463//1927 2460//182
f 2402//1870 2403//1869 2436//1905 2435//182
f 2406//1874 2407//1873 2440//1908 2439//1907
f 2403//1869 2406//1874 2439//1907 2436//1905
f 2421//1887 2422//1886 2452//1918 2451//1917
f 2428//1894 2429//1893 2456//1922 2455//1921
f 2422//1886 2428//1894 2455//1921 2452//1918
f 2392//1858 2393//1857 2409//1899 2408//1900
f 2405//1872 2417//1882 2421//1887 2407//1873
f 2398//1866 2399//1864 2412//1879 2411//1878
f 2393//1857 2398//1866 2411//1878 2409//1899
f 2392//1858 2408//1900 2417//1882 2405//1872
f 2440//1908 2451//1917 2453//1920 2442//182
f 2448//1914 2459//182 2461//1926 2450//1915
f 2442//182 2453//1920 2459//182 2448//1914
f 2407//1873 2421//1887 2451//1917 2440//1908
f 2468//1929 2469//1930 2471//1931 2470//1932
f 2474//1933 2475//1864 2477//1934 2476//1935
f 2473//1864 2475//1864 2474//1933 2472//1936
f 2479//1937 2480//1938 2482//1939 2481//1940
f 2476//1935 2477//1934 2480//1938 2479//1937
f 2469//1930 2474//1933 2476//1935 2471//1931
f 2472//1936 2474//1933 2469//1930 2467//1941
f 2471//1931 2476//1935 2479//1937 2478//1942
f 2483//1943 2484//1944 2487//1945 2486//1946
f 2488//1947 2489//1948 2491//1949 2490//1950
f 2488//1947 2490//1950 2493//1951 2492//1952
f 2497//1953 2498//1954 2500//1920 2499//182
f 2501//1955 2502//1956 2504//1957 2503//1958
f 2486//1946 2487//1945 2498//1954 2497//1953
f 2492//1952 2493//1951 2502//1956 2501//1955
f 2484//1944 2485//1959 2489//1948 2488//1947
f 2484//1944 2488//1947 2492//1952 2487//1945
f 2498//1954 2501//1955 2503//1958 2500//1920
f 2489//1948 2494//1960 2495//1961 2491//1949
f 2487//1945 2492//1952 2501//1955 2498//1954
f 2508//1962 2509//1963 2511//1964 2510//1965
f 2506//1966 2509//1963 2508//1962 2505//1967
f 2506//1966 2507//1968 2511//1964 2509//1963
f 2512//1969 2513//1970 2515//1864 2514//1971
f 2515//1864 2517//1864 2516//1972 2514//1971
f 2521//1973 2522//1974 2524//1975 2523//1976
f 2525//1977 2526//1978 2528//1979 2527//1980
f 2529//1981 2530//1982 2532//1983 2531//1984
f 2529//1981 2531//1984 2534//1985 2533//1986
f 2508//1962 2510//1965 2526//1978 2525//1977
f 2519//1987 2530//1982 2529//1981 2518//1988
f 2519//1987 2520//1989 2532//1983 2530//1982
f 2510//1965 2511//1964 2519//1987 2518//1988
f 2526//1978 2529//1981 2533//1986 2528//1979
f 2516//1972 2517//1864 2522//1974 2521//1973
f 2506//1966 2512//1969 2514//1971 2507//1968
f 2514//1971 2516//1972 2511//1964 2507//1968
f 2519//1987 2521//1973 2523//1976 2520//1989
f 2511//1964 2516//1972 2521//1973 2519//1987
f 2523//1976 2535//1990 2532//1983 2520//1989
f 2510//1965 2518//1988 2529//1981 2526//1978
f 2471//1931 2485//1959 2484//1944 2470//1932
f 2468//1929 2470//1932 2484//1944 2483//1943
f 2482//1939 2496//1991 2495//1961 2481//1940
f 2479//1937 2481//1940 2495//1961 2494//1960
f 2479//1937 2494//1960 2489//1948 2478//1942
f 2471//1931 2478//1942 2489//1948 2485//1959
f 2490//1950 2491//1949 2506//1966 2505//1967
f 2490//1950 2505//1967 2508//1962 2493//1951
f 2502//1956 2525//1977 2527//1980 2504//1957
f 2495//1961 2496//1991 2513//1970 2512//1969
f 2491//1949 2495//1961 2512//1969 2506//1966
f 2493//1951 2508//1962 2525//1977 2502//1956
f 2311//1837 2386//1876 2385//1875 2310//1838
f 2308//1835 2310//1838 2385//1875 2384//1877
f 2308//1835 2384//1877 2379//1850 2303//1992
f 2261//223 2325//226 2327//229 2263//1730
f 2337//239 2338//1802 2271//1793 2270//1825
f 2271//1793 2338//1802 2341//1811 2275//1790
f 2345//1807 2346//1806 2279//1797 2278//1796
f 2341//1811 2345//1807 2278//1796 2275//1790
f 2263//1730 2327//229 2337//239 2270//1825
f 2429//1893 2430//1892 2469//1930 2468//1929
f 2427//1890 2467//1941 2469//1930 2430//1892
f 2433//1898 2434//1897 2473//1864 2472//1936
f 2427//1890 2433//1898 2472//1936 2467//1941
f 2456//1922 2483//1943 2486//1946 2458//1923
f 2464//1928 2497//1953 2499//182 2466//182
f 2458//1923 2486//1946 2497//1953 2464//1928
f 2429//1893 2468//1929 2483//1943 2456//1922
f 2541//1993 2542//1994 2544//1995 2543//1996
f 2544//1995 2547//1997 2546//1998 2543//1996
f 2541//1993 2543//1996 2546//1998 2545//1999
f 2548//2000 2549//2001 2551//2002 2550//2003
f 2553//2004 2554//2005 2556//2006 2555//2007
f 2559//2008 2560//1864 2562//2009 2561//2010
f 2558//1864 2560//1864 2559//2008 2557//2011
f 2540//2012 2549//2001 2548//2000 2539//2013
f 2546//1998 2547//1997 2554//2005 2553//2004
f 2544//1995 2552//2014 2554//2005 2547//1997
f 2550//2003 2551//2002 2558//1864 2557//2011
f 2542//1994 2548//2000 2550//2003 2544//1995
f 2554//2005 2559//2008 2561//2010 2556//2006
f 2557//2011 2559//2008 2554//2005 2552//2014
f 2544//1995 2550//2003 2557//2011 2552//2014
f 2561//2010 2562//2009 2565//2015 2564//2016
f 2556//2006 2561//2010 2564//2016 2563//2017
f 2571//2018 2572//2019 2570//2020 2569//2021
f 2566//2022 2569//2021 2570//2020 2567//2023
f 2566//2022 2568//2024 2571//2018 2569//2021
f 2575//2025 2576//2026 2574//102 2573//2027
f 2577//2028 2578//2029 2581//2030 2579//2031
f 2587//2032 2588//2033 2586//2034 2585//2035
f 2592//2036 2593//2026 2591//2026 2590//2037
f 2592//2036 2594//2038 2595//2026 2593//2026
f 2575//2025 2583//2039 2584//2026 2576//2026
f 2579//2031 2585//2035 2586//2034 2580//2040
f 2579//2031 2581//2030 2587//2032 2585//2035
f 2579//2031 2580//2040 2572//2019 2571//2018
f 2568//2024 2577//2028 2579//2031 2571//2018
f 2590//2037 2591//2026 2584//2026 2583//2039
f 2572//2019 2575//2025 2573//2027 2570//2020
f 2588//2033 2592//2036 2590//2037 2586//2034
f 2588//2033 2589//2041 2594//2038 2592//2036
f 2586//2034 2590//2037 2583//2039 2582//2042
f 2572//2019 2582//2042 2583//2039 2575//2025
f 2572//2019 2580//2040 2586//2034 2582//2042
f 2596//2043 2597//2044 2599//2045 2598//2046
f 2600//2047 2601//2048 2603//2049 2602//2050
f 2606//2051 2607//2052 2605//2053 2604//2054
f 2606//2051 2609//2055 2610//2056 2607//2052
f 2605//2053 2607//2052 2610//2056 2608//2057
f 2613//2058 2614//2059 2612//2060 2611//2061
f 2615//2062 2616//2063 2619//2064 2617//2065
f 2598//2046 2599//2045 2606//2051 2604//2054
f 2602//2050 2603//2049 2616//2063 2615//2062
f 2597//2044 2600//2047 2602//2050 2599//2045
f 2617//2065 2618//2066 2610//2056 2609//2055
f 2606//2051 2615//2062 2617//2065 2609//2055
f 2610//2056 2613//2058 2611//2061 2608//2057
f 2599//2045 2602//2050 2615//2062 2606//2051
f 2623//2067 2624//401 2626//401 2625//2068
f 2629//2069 2630//2070 2632//2071 2631//2072
f 2627//2073 2628//2074 2632//2071 2630//2070
f 2633//2075 2634//401 2636//401 2635//2076
f 2633//2075 2637//2077 2638//401 2634//401
f 2639//2078 2640//2079 2642//2080 2641//2081
f 2639//2078 2641//2081 2644//2082 2643//2083
f 2647//2084 2648//2085 2650//2086 2649//2087
f 2621//2088 2641//2081 2642//2080 2622//2089
f 2620//2090 2622//2089 2642//2080 2640//2079
f 2623//2067 2645//2091 2646//401 2624//401
f 2629//2069 2631//2072 2648//2085 2647//2084
f 2621//2088 2622//2089 2630//2070 2629//2069
f 2641//2081 2647//2084 2649//2087 2644//2082
f 2625//2068 2626//401 2638//401 2637//2077
f 2620//2090 2623//2067 2625//2068 2622//2089
f 2627//2073 2633//2075 2635//2076 2628//2074
f 2627//2073 2630//2070 2637//2077 2633//2075
f 2622//2089 2625//2068 2637//2077 2630//2070
f 2620//2090 2640//2079 2645//2091 2623//2067
f 2621//2088 2629//2069 2647//2084 2641//2081
f 2651//2092 2652//2093 2654//2094 2653//2095
f 2651//2092 2655//2096 2656//2097 2652//2093
f 2651//2092 2653//2095 2657//2098 2655//2096
f 2658//2099 2659//401 2661//2100 2660//2101
f 2662//2102 2664//2103 2666//2104 2665//2105
f 2667//2106 2668//2107 2670//2108 2669//2109
f 2671//2110 2672//2111 2674//182 2673//1684
f 2655//2096 2657//2098 2668//2107 2667//2106
f 2665//2105 2666//2104 2672//2111 2671//2110
f 2653//2095 2654//2094 2663//2112 2662//2102
f 2653//2095 2662//2102 2665//2105 2657//2098
f 2668//2107 2671//2110 2673//1684 2670//2108
f 2652//2093 2658//2099 2660//2101 2654//2094
f 2657//2098 2665//2105 2671//2110 2668//2107
f 2613//2058 2660//2101 2661//2100 2614//2059
f 2617//2065 2662//2102 2663//2112 2618//2066
f 2617//2065 2619//2064 2664//2103 2662//2102
f 2610//2056 2654//2094 2660//2101 2613//2058
f 2610//2056 2618//2066 2663//2112 2654//2094
f 2578//2029 2596//2043 2598//2046 2581//2030
f 2604//2054 2605//2053 2588//2033 2587//2032
f 2588//2033 2605//2053 2608//2057 2589//2041
f 2611//2061 2612//2060 2595//2026 2594//2038
f 2608//2057 2611//2061 2594//2038 2589//2041
f 2581//2030 2598//2046 2604//2054 2587//2032
f 2631//2072 2632//2071 2656//2097 2655//2096
f 2628//2074 2652//2093 2656//2097 2632//2071
f 2648//2085 2667//2106 2669//2109 2650//2086
f 2635//2076 2636//401 2659//401 2658//2099
f 2628//2074 2635//2076 2658//2099 2652//2093
f 2631//2072 2655//2096 2667//2106 2648//2085
f 2675//182 2676//182 2678//2113 2677//2114
f 2679//182 2680//1927 2682//182 2681//2115
f 2683//2116 2684//2117 2686//2118 2685//2119
f 2687//2120 2688//2121 2690//2122 2689//2123
f 2677//2114 2678//2113 2684//2117 2683//2116
f 2681//2115 2682//182 2688//2121 2687//2120
f 2676//182 2679//182 2681//2115 2678//2113
f 2684//2117 2687//2120 2689//2123 2686//2118
f 2678//2113 2681//2115 2687//2120 2684//2117
f 2691//2124 2692//2125 2694//182 2693//182
f 2695//2126 2696//2127 2698//2128 2697//2129
f 2699//182 2700//182 2702//182 2701//182
f 2703//182 2704//182 2706//182 2705//182
f 2693//182 2694//182 2700//182 2699//182
f 2697//2129 2698//2128 2704//182 2703//182
f 2692//2125 2695//2126 2697//2129 2694//182
f 2700//182 2703//182 2705//182 2702//182
f 2694//182 2697//2129 2703//182 2700//182
f 2707//2130 2708//2131 2710//2132 2709//2133
f 2711//2134 2712//2135 2714//2136 2713//1726
f 2715//2137 2716//1724 2718//182 2717//182
f 2719//182 2720//182 2722//2138 2721//2139
f 2709//2133 2710//2132 2716//1724 2715//2137
f 2713//1726 2714//2136 2720//182 2719//182
f 2708//2131 2711//2134 2713//1726 2710//2132
f 2716//1724 2719//182 2721//2139 2718//182
f 2710//2132 2713//1726 2719//182 2716//1724
f 2723//182 2724//182 2726//182 2725//182
f 2727//182 2728//182 2730//2140 2729//182
f 2731//182 2732//2141 2734//2142 2733//2143
f 2735//2144 2736//2145 2738//2146 2737//2147
f 2725//182 2726//182 2732//2141 2731//182
f 2729//182 2730//2140 2736//2145 2735//2144
f 2724//182 2727//182 2729//182 2726//182
f 2732//2141 2735//2144 2737//2147 2734//2142
f 2726//182 2729//182 2735//2144 2732//2141
f 2685//2119 2686//2118 2708//2131 2707//2130
f 2689//2123 2690//2122 2712//2135 2711//2134
f 2686//2118 2689//2123 2711//2134 2708//2131
f 2701//182 2702//182 2724//182 2723//182
f 2705//182 2706//182 2728//182 2727//182
f 2702//182 2705//182 2727//182 2724//182
f 2680//1927 2691//2124 2693//182 2682//182
f 2688//2121 2699//182 2701//182 2690//2122
f 2682//182 2693//182 2699//182 2688//2121
f 2712//2135 2723//182 2725//182 2714//2136
f 2720//182 2731//182 2733//2143 2722//2138
f 2714//2136 2725//182 2731//182 2720//182
f 2690//2122 2701//182 2723//182 2712//2135
f 2739//2148 2740//2149 2742//1684 2741//1683
f 2743//1682 2744//1681 2746//182 2745//182
f 2747//182 2748//182 2750//2150 2749//182
f 2751//182 2752//2151 2754//2152 2753//2153
f 2741//1683 2742//1684 2748//182 2747//182
f 2745//182 2746//182 2752//2151 2751//182
f 2740//2149 2743//1682 2745//182 2742//1684
f 2748//182 2751//182 2753//2153 2750//2150
f 2742//1684 2745//182 2751//182 2748//182
f 2755//1724 2756//182 2758//560 2757//182
f 2759//182 2760//182 2762//2154 2761//2155
f 2763//2156 2764//2157 2766//2158 2765//2159
f 2767//2160 2768//2161 2770//2162 2769//2163
f 2757//182 2758//560 2764//2157 2763//2156
f 2761//2155 2762//2154 2768//2161 2767//2160
f 2756//182 2759//182 2761//2155 2758//560
f 2764//2157 2767//2160 2769//2163 2766//2158
f 2758//560 2761//2155 2767//2160 2764//2157
f 2771//2164 2772//2165 2774//2166 2773//2167
f 2775//2168 2776//2169 2778//2170 2777//2171
f 2785//2172 2786//2173 2784//2174 2783//2175
f 2782//2176 2786//2173 2785//2172 2781//2177
f 2780//2178 2781//2177 2785//2172 2783//2175
f 2789//2179 2790//2180 2788//2181 2787//2182
f 2793//2183 2794//2184 2792//2185 2791//2186
f 2798//2187 2799//2180 2797//2180 2796//2188
f 2797//2180 2801//2180 2800//2189 2796//2188
f 2773//2167 2774//2166 2781//2177 2780//2178
f 2779//2190 2794//2184 2793//2183 2778//2170
f 2777//2171 2778//2170 2793//2183 2791//2186
f 2772//2165 2775//2168 2777//2171 2774//2166
f 2791//2186 2792//2185 2782//2176 2781//2177
f 2782//2176 2792//2185 2795//2191 2786//2173
f 2800//2189 2801//2180 2790//2180 2789//2179
f 2786//2173 2789//2179 2787//2182 2784//2174
f 2794//2184 2798//2187 2796//2188 2792//2185
f 2796//2188 2800//2189 2795//2191 2792//2185
f 2795//2191 2800//2189 2789//2179 2786//2173
f 2774//2166 2777//2171 2791//2186 2781//2177
f 2806//2192 2807//2193 2805//2194 2804//2195
f 2802//2196 2803//2197 2806//2192 2804//2195
f 2812//2198 2813//2199 2811//2200 2810//2201
f 2811//2200 2815//2202 2814//2203 2810//2201
f 2811//2200 2813//2199 2816//2204 2815//2202
f 2821//2205 2822//2180 2820//2180 2819//2206
f 2818//2180 2822//2180 2821//2205 2817//2207
f 2827//2208 2828//2180 2826//2181 2825//2209
f 2805//2194 2807//2193 2824//2210 2823//2211
f 2809//2180 2828//2180 2827//2208 2808//2212
f 2814//2203 2815//2202 2807//2193 2806//2192
f 2803//2197 2810//2201 2814//2203 2806//2192
f 2819//2206 2820//2180 2809//2180 2808//2212
f 2816//2204 2821//2205 2819//2206 2815//2202
f 2817//2207 2821//2205 2816//2204 2813//2199
f 2824//2210 2827//2208 2825//2209 2823//2211
f 2815//2202 2819//2206 2808//2212 2807//2193
f 2808//2212 2827//2208 2824//2210 2807//2193
f 2749//182 2750//2150 2772//2165 2771//2164
f 2753//2153 2754//2152 2776//2169 2775//2168
f 2750//2150 2753//2153 2775//2168 2772//2165
f 2765//2159 2766//2158 2803//2197 2802//2196
f 2769//2163 2770//2162 2812//2198 2810//2201
f 2766//2158 2769//2163 2810//2201 2803//2197
f 2744//1681 2755//1724 2757//182 2746//182
f 2752//2151 2763//2156 2765//2159 2754//2152
f 2746//182 2757//182 2763//2156 2752//2151
f 2804//2195 2805//2194 2779//2190 2778//2170
f 2776//2169 2802//2196 2804//2195 2778//2170
f 2825//2209 2826//2181 2799//2180 2798//2187
f 2823//2211 2825//2209 2798//2187 2794//2184
f 2779//2190 2805//2194 2823//2211 2794//2184
f 2754//2152 2765//2159 2802//2196 2776//2169
f 2829//2213 2830//2214 2832//2215 2831//2216
f 2833//2217 2834//2218 2836//2219 2835//2220
f 2841//2221 2842//2222 2840//2223 2839//2224
f 2837//2225 2838//2226 2841//2221 2839//2224
f 2848//2227 2849//2228 2847//2229 2846//2230
f 2845//2231 2849//2228 2848//2227 2844//2232
f 2843//2233 2844//2232 2848//2227 2846//2230
f 2852//2234 2853//2180 2851//2180 2850//2235
f 2831//2216 2832//2215 2838//2226 2837//2225
f 2835//2220 2836//2219 2844//2232 2843//2233
f 2830//2214 2833//2217 2835//2220 2832//2215
f 2846//2230 2847//2229 2842//2222 2841//2221
f 2838//2226 2843//2233 2846//2230 2841//2221
f 2849//2228 2852//2234 2850//2235 2847//2229
f 2832//2215 2835//2220 2843//2233 2838//2226
f 2854//2236 2855//2237 2857//2238 2856//2239
f 2863//2240 2864//2241 2862//2242 2861//2243
f 2859//2244 2860//2245 2863//2240 2861//2243
f 2869//2246 2870//2247 2868//2248 2867//2249
f 2874//2250 2875//2180 2873//2180 2872//2251
f 2873//2180 2877//2180 2876//2252 2872//2251
f 2882//2253 2883//2180 2881//2180 2880//2254
f 2858//2255 2870//2247 2869//2246 2857//2238
f 2856//2239 2857//2238 2869//2246 2867//2249
f 2862//2242 2864//2241 2879//2256 2878//2257
f 2866//2181 2883//2180 2882//2253 2865//2258
f 2861//2243 2862//2242 2858//2255 2857//2238
f 2855//2237 2859//2244 2861//2243 2857//2238
f 2880//2254 2881//2180 2875//2180 2874//2250
f 2870//2247 2874//2250 2872//2251 2868//2248
f 2872//2251 2876//2252 2871//2259 2868//2248
f 2879//2256 2882//2253 2880//2254 2878//2257
f 2878//2257 2880//2254 2874//2250 2870//2247
f 2865//2258 2882//2253 2879//2256 2864//2241
f 2858//2255 2862//2242 2878//2257 2870//2247
f 2889//2260 2890//2180 2888//2180 2887//2261
f 2892//2262 2893//2180 2890//2180 2889//2260
f 2886//2263 2889//2260 2887//2261 2885//2264
f 2891//2265 2892//2262 2889//2260 2886//2263
f 2840//2223 2885//2264 2884//2266 2839//2224
f 2840//2223 2842//2222 2886//2263 2885//2264
f 2851//2180 2893//2180 2892//2262 2850//2235
f 2850//2235 2892//2262 2891//2265 2847//2229
f 2842//2222 2847//2229 2891//2265 2886//2263
f 2834//2218 2854//2236 2856//2239 2836//2219
f 2867//2249 2868//2248 2845//2231 2844//2232
f 2845//2231 2868//2248 2871//2259 2849//2228
f 2876//2252 2877//2180 2853//2180 2852//2234
f 2871//2259 2876//2252 2852//2234 2849//2228
f 2836//2219 2856//2239 2867//2249 2844//2232
f 2643//2083 2644//2082 2740//2149 2739//2148
f 2649//2087 2650//2086 2744//1681 2743//1682
f 2644//2082 2649//2087 2743//1682 2740//2149
f 2669//2109 2670//2108 2756//182 2755//1724
f 2673//1684 2674//182 2760//182 2759//182
f 2670//2108 2673//1684 2759//182 2756//182
f 2650//2086 2669//2109 2755//1724 2744//1681
f 2717//182 2718//182 2830//2214 2829//2213
f 2721//2139 2722//2138 2834//2218 2833//2217
f 2718//182 2721//2139 2833//2217 2830//2214
f 2733//2143 2734//2142 2855//2237 2854//2236
f 2737//2147 2738//2146 2860//2245 2859//2244
f 2734//2142 2737//2147 2859//2244 2855//2237
f 2722//2138 2733//2143 2854//2236 2834//2218
f 2601//2048 2675//182 2677//2114 2603//2049
f 2616//2063 2683//2116 2685//2119 2619//2064
f 2603//2049 2677//2114 2683//2116 2616//2063
f 2664//2103 2707//2130 2709//2133 2666//2104
f 2672//2111 2715//2137 2717//182 2674//182
f 2666//2104 2709//2133 2715//2137 2672//2111
f 2619//2064 2685//2119 2707//2130 2664//2103
f 2760//182 2829//2213 2831//2216 2762//2154
f 2768//2161 2837//2225 2839//2224 2770//2162
f 2762//2154 2831//2216 2837//2225 2768//2161
f 2884//2266 2885//2264 2813//2199 2812//2198
f 2887//2261 2888//2180 2818//2180 2817//2207
f 2885//2264 2887//2261 2817//2207 2813//2199
f 2770//2162 2839//2224 2884//2266 2812//2198
f 2674//182 2717//182 2829//2213 2760//182
f 2894//2267 2895//2268 2897//2269 2896//2270
f 2898//2271 2899//2272 2902//2273 2901//2274
f 2903//2275 2904//2276 2906//1780 2905//182
f 2907//2277 2908//2278 2910//1778 2909//1781
f 2896//2270 2897//2269 2904//2276 2903//2275
f 2901//2274 2902//2273 2908//2278 2907//2277
f 2895//2268 2898//2271 2901//2274 2897//2269
f 2904//2276 2907//2277 2909//1781 2906//1780
f 2897//2269 2901//2274 2907//2277 2904//2276
f 2912//2279 2914//2280 2913//2281 2911//2282
f 2916//2283 2918//1766 2917//2284 2915//2285
f 2920//1763 2922//1763 2921//1782 2919//1782
f 2924//1766 2926//1766 2925//1767 2923//1767
f 2914//2280 2920//1763 2919//1782 2913//2281
f 2918//1766 2924//1766 2923//1767 2917//2284
f 2915//2285 2917//2284 2914//2280 2912//2279
f 2923//1767 2925//1767 2922//1763 2920//1763
f 2917//2284 2923//1767 2920//1763 2914//2280
f 2927//182 2928//1780 2930//2286 2929//2287
f 2931//1781 2932//1778 2934//2288 2933//2289
f 2935//2290 2936//2291 2938//2292 2937//2293
f 2943//2294 2944//2295 2942//2296 2941//2297
f 2939//2298 2940//2299 2943//2294 2941//2297
f 2929//2287 2930//2286 2936//2291 2935//2290
f 2933//2289 2934//2288 2940//2299 2939//2298
f 2928//1780 2931//1781 2933//2289 2930//2286
f 2936//2291 2939//2298 2941//2297 2938//2292
f 2930//2286 2933//2289 2939//2298 2936//2291
f 2947//1763 2949//1763 2948//2300 2946//1782
f 2951//1766 2953//1766 2952//1767 2950//1767
f 2955//2301 2957//2302 2956//2303 2954//2304
f 2959//2305 2961//2306 2960//2307 2958//2308
f 2949//1763 2955//2301 2954//2304 2948//2300
f 2953//1766 2959//2305 2958//2308 2952//1767
f 2950//1767 2952//1767 2949//1763 2947//1763
f 2958//2308 2960//2307 2957//2302 2955//2301
f 2952//1767 2958//2308 2955//2301 2949//1763
f 2905//182 2906//1780 2928//1780 2927//182
f 2909//1781 2910//1778 2932//1778 2931//1781
f 2906//1780 2909//1781 2931//1781 2928//1780
f 2922//1763 2947//1763 2946//1782 2921//1782
f 2926//1766 2951//1766 2950//1767 2925//1767
f 2925//1767 2950//1767 2947//1763 2922//1763
f 2899//2272 2900//2309 2912//2279 2911//2282
f 2899//2272 2911//2282 2913//2281 2902//2273
f 2908//2278 2919//1782 2921//1782 2910//1778
f 2902//2273 2913//2281 2919//1782 2908//2278
f 2932//1778 2946//1782 2948//2300 2934//2288
f 2956//2303 2957//2302 2944//2295 2943//2294
f 2940//2299 2954//2304 2956//2303 2943//2294
f 2957//2302 2960//2307 2945//2310 2944//2295
f 2934//2288 2948//2300 2954//2304 2940//2299
f 2910//1778 2921//1782 2946//1782 2932//1778
f 2964//2311 2965//2312 2963//2313 2962//2314
f 2963//2313 2967//2315 2966//2316 2962//2314
f 2963//2313 2965//2312 2968//2317 2967//2315
f 2973//2318 2974//2180 2972//2180 2971//2319
f 2970//2180 2974//2180 2973//2318 2969//2320
f 2980//2321 2981//2322 2979//2323 2978//2324
f 2975//2325 2976//2326 2965//2312 2964//2311
f 2978//2324 2979//2323 2970//2180 2969//2320
f 2968//2317 2973//2318 2971//2319 2967//2315
f 2969//2320 2973//2318 2968//2317 2965//2312
f 2977//2327 2980//2321 2978//2324 2976//2326
f 2976//2326 2978//2324 2969//2320 2965//2312
f 2982//2328 2983//2329 2981//2322 2980//2321
f 2937//2293 2938//2292 2964//2311 2962//2314
f 2942//2296 2976//2326 2975//2325 2941//2297
f 2942//2296 2944//2295 2977//2327 2976//2326
f 2945//2310 2980//2321 2977//2327 2944//2295
f 2938//2292 2941//2297 2975//2325 2964//2311
f 2961//2306 2983//2329 2982//2328 2960//2307
f 2945//2310 2960//2307 2982//2328 2980//2321
f 2445//1912 2446//1911 2568//2024 2566//2022
f 2449//1916 2450//1915 2578//2029 2577//2028
f 2446//1911 2449//1916 2577//2028 2568//2024
f 2461//1926 2462//1925 2597//2044 2596//2043
f 2465//182 2466//182 2601//2048 2600//2047
f 2462//1925 2465//182 2600//2047 2597//2044
f 2450//1915 2461//1926 2596//2043 2578//2029
f 2499//182 2500//1920 2676//182 2675//182
f 2503//1958 2504//1957 2680//1927 2679//182
f 2500//1920 2503//1958 2679//182 2676//182
f 2527//1980 2528//1979 2692//2125 2691//2124
f 2533//1986 2534//1985 2696//2127 2695//2126
f 2528//1979 2533//1986 2695//2126 2692//2125
f 2504//1957 2527//1980 2691//2124 2680//1927
f 2466//182 2499//182 2675//182 2601//2048
f 2545//1999 2546//1998 2895//2268 2894//2267
f 2556//2006 2900//2309 2899//2272 2555//2007
f 2553//2004 2555//2007 2899//2272 2898//2271
f 2546//1998 2553//2004 2898//2271 2895//2268
f 2565//2015 2916//2283 2915//2285 2564//2016
f 2564//2016 2915//2285 2912//2279 2563//2017
f 2556//2006 2563//2017 2912//2279 2900//2309
f 2537//1832 2538//1798 2375//1833 2374//1834
f 2536//2330 2537//1832 2374//1834 2371//1848
f 2531//1984 2532//1983 2542//1994 2541//1993
f 2531//1984 2541//1993 2545//1999 2534//1985
f 2523//1976 2524//1975 2540//2012 2539//2013
f 2532//1983 2535//1990 2548//2000 2542//1994
f 2523//1976 2539//2013 2548//2000 2535//1990
f 2696//2127 2894//2267 2896//2270 2698//2128
f 2704//182 2903//2275 2905//182 2706//182
f 2698//2128 2896//2270 2903//2275 2704//182
f 2728//182 2927//182 2929//2287 2730//2140
f 2736//2145 2935//2290 2937//2293 2738//2146
f 2730//2140 2929//2287 2935//2290 2736//2145
f 2706//182 2905//182 2927//182 2728//182
f 2966//2316 2967//2315 2864//2241 2863//2240
f 2860//2245 2962//2314 2966//2316 2863//2240
f 2971//2319 2972//2180 2866//2181 2865//2258
f 2967//2315 2971//2319 2865//2258 2864//2241
f 2738//2146 2937//2293 2962//2314 2860//2245
f 2534//1985 2545//1999 2894//2267 2696//2127
f 2016//1672 2017//1671 2241//182 2240//186
f 2020//555 2021//199 2245//182 2244//182
f 2017//1671 2020//555 2244//182 2241//182
f 2032//182 2033//182 2257//212 2256//209
f 2036//182 2037//208 2261//223 2260//222
f 2033//182 2036//182 2260//222 2257//212
f 2021//199 2032//182 2256//209 2245//182
f 2097//211 2098//210 2326//227 2325//226
f 2101//213 2102//225 2330//1795 2329//1731
f 2098//210 2101//213 2329//1731 2326//227
f 2113//1730 2114//229 2358//239 2356//1825
f 2119//1823 2371//1848 2370//1847 2118//1732
f 2117//228 2118//1732 2370//1847 2368//236
f 2114//229 2117//228 2368//236 2358//239
f 2102//225 2113//1730 2356//1825 2330//1795
f 2037//208 2097//211 2325//226 2261//223
f 2213//1798 2538//1798 2537//1832 2212//1799
f 2212//1799 2537//1832 2536//2330 2209//1791
f 2119//1823 2209//1791 2536//2330 2371//1848
f 2990//2331 2991//2332 2993//2332 2992//2333
f 2997//2334 2998//2335 3000//2336 2999//2337
f 2997//2334 2999//2337 3002//2338 3001//2339
f 3003//2340 3004//2341 3006//2342 3005//2343
f 3006//2342 3009//2344 3008//2345 3005//2343
f 3003//2340 3005//2343 3008//2345 3007//2346
f 3010//2347 3011//2348 3013//2348 3012//2349
f 2986//2350 2998//2335 2997//2334 2985//2351
f 2986//2350 2987//2352 3000//2336 2998//2335
f 2996//2332 3011//2348 3010//2347 2995//2353
f 2999//2337 3000//2336 3004//2341 3003//2340
f 2999//2337 3003//2340 3007//2346 3002//2338
f 2992//2333 2993//2332 2996//2332 2995//2353
f 2986//2350 2990//2331 2992//2333 2987//2352
f 3004//2341 3010//2347 3012//2349 3006//2342
f 2987//2352 2992//2333 2995//2353 2994//2354
f 2995//2353 3010//2347 3004//2341 2994//2354
f 2987//2352 2994//2354 3004//2341 3000//2336
f 3015//2355 3016//2356 3018//2357 3017//2358
f 3021//2359 3022//2348 3024//2348 3023//2360
f 3020//2348 3022//2348 3021//2359 3019//2361
f 3027//2362 3028//2348 3030//2348 3029//2363
f 3023//2360 3024//2348 3028//2348 3027//2362
f 3016//2356 3021//2359 3023//2360 3018//2357
f 3019//2361 3021//2359 3016//2356 3014//2364
f 3025//2365 3027//2362 3029//2363 3026//2366
f 3018//2357 3023//2360 3027//2362 3025//2365
f 3031//2367 3032//2368 3034//2369 3033//2370
f 3035//2371 3036//2372 3038//2373 3037//2374
f 3039//182 3040//182 3042//324 3041//2375
f 3043//182 3044//2376 3046//182 3045//325
f 3033//2370 3034//2369 3040//182 3039//182
f 3037//2374 3038//2373 3044//2376 3043//182
f 3032//2368 3035//2371 3037//2374 3034//2369
f 3040//182 3043//182 3045//325 3042//324
f 3034//2369 3037//2374 3043//182 3040//182
f 3047//2377 3048//2378 3051//2379 3050//2380
f 3052//2381 3053//2382 3055//2383 3054//2384
f 3052//2381 3054//2384 3057//2385 3056//2386
f 3060//2387 3061//2388 3063//2389 3062//182
f 3064//2390 3065//2391 3067//2392 3066//2393
f 3050//2380 3051//2379 3061//2388 3060//2387
f 3056//2386 3057//2385 3065//2391 3064//2390
f 3048//2378 3049//2394 3053//2382 3052//2381
f 3048//2378 3052//2381 3056//2386 3051//2379
f 3061//2388 3064//2390 3066//2393 3063//2389
f 3051//2379 3056//2386 3064//2390 3061//2388
f 3001//2339 3002//2338 3032//2368 3031//2367
f 3007//2346 3008//2345 3036//2372 3035//2371
f 3002//2338 3007//2346 3035//2371 3032//2368
f 3018//2357 3049//2394 3048//2378 3017//2358
f 3015//2355 3017//2358 3048//2378 3047//2377
f 3025//2365 3026//2366 3055//2383 3053//2382
f 3030//2348 3059//2348 3058//2395 3029//2363
f 3029//2363 3058//2395 3055//2383 3026//2366
f 3018//2357 3025//2365 3053//2382 3049//2394
f 3008//2345 3009//2344 3016//2356 3015//2355
f 3006//2342 3014//2364 3016//2356 3009//2344
f 3012//2349 3013//2348 3020//2348 3019//2361
f 3006//2342 3012//2349 3019//2361 3014//2364
f 3036//2372 3047//2377 3050//2380 3038//2373
f 3044//2376 3060//2387 3062//182 3046//182
f 3038//2373 3050//2380 3060//2387 3044//2376
f 3008//2345 3015//2355 3047//2377 3036//2372
f 3071//2396 3072//2397 3074//2398 3073//2399
f 3069//2400 3072//2397 3071//2396 3068//2401
f 3069//2400 3070//2402 3074//2398 3072//2397
f 3075//2403 3076//2348 3078//2348 3077//2404
f 3078//2348 3080//2348 3079//2405 3077//2404
f 3081//2406 3082//2407 3084//2408 3083//2409
f 3085//2410 3086//2348 3088//2348 3087//2411
f 3089//2412 3090//2413 3092//2414 3091//2415
f 3093//2416 3094//2417 3097//2418 3096//2419
f 3071//2396 3073//2399 3090//2413 3089//2412
f 3084//2408 3095//2420 3094//2417 3083//2409
f 3081//2406 3083//2409 3094//2417 3093//2416
f 3073//2399 3074//2398 3082//2407 3081//2406
f 3090//2413 3093//2416 3096//2419 3092//2414
f 3079//2405 3080//2348 3086//2348 3085//2410
f 3069//2400 3075//2403 3077//2404 3070//2402
f 3077//2404 3079//2405 3074//2398 3070//2402
f 3082//2407 3085//2410 3087//2411 3084//2408
f 3074//2398 3079//2405 3085//2410 3082//2407
f 3073//2399 3081//2406 3093//2416 3090//2413
f 3101//2421 3102//2422 3104//2423 3103//2424
f 3104//2423 3107//2425 3106//2426 3103//2424
f 3101//2421 3103//2424 3106//2426 3105//2427
f 3108//2428 3109//2348 3111//2348 3110//2429
f 3113//2430 3114//2431 3116//2432 3115//2433
f 3119//2434 3120//2348 3122//2348 3121//2435
f 3118//2348 3120//2348 3119//2434 3117//2436
f 3100//2348 3109//2348 3108//2428 3099//2437
f 3106//2426 3107//2425 3114//2431 3113//2430
f 3104//2423 3112//2438 3114//2431 3107//2425
f 3110//2429 3111//2348 3118//2348 3117//2436
f 3102//2422 3108//2428 3110//2429 3104//2423
f 3114//2431 3119//2434 3121//2435 3116//2432
f 3117//2436 3119//2434 3114//2431 3112//2438
f 3104//2423 3110//2429 3117//2436 3112//2438
f 3099//2437 3108//2428 3102//2422 3098//2439
f 3094//2417 3095//2420 3102//2422 3101//2421
f 3094//2417 3101//2421 3105//2427 3097//2418
f 3087//2411 3088//2348 3100//2348 3099//2437
f 3084//2408 3087//2411 3099//2437 3098//2439
f 3084//2408 3098//2439 3102//2422 3095//2420
f 3123//2440 3124//2441 3126//2442 3125//2443
f 3127//2444 3128//2445 3130//2446 3129//2447
f 3133//2448 3134//2449 3132//2450 3131//2451
f 3133//2448 3136//2452 3137//2453 3134//2449
f 3132//2450 3134//2449 3137//2453 3135//2454
f 3142//2455 3143//2456 3141//611 3140//2457
f 3138//2458 3140//2457 3141//611 3139//611
f 3148//2459 3149//2460 3147//2461 3146//2462
f 3144//2463 3145//2464 3148//2459 3146//2462
f 3125//2443 3126//2442 3133//2448 3131//2451
f 3129//2447 3130//2446 3145//2464 3144//2463
f 3124//2441 3127//2444 3129//2447 3126//2442
f 3146//2462 3147//2461 3137//2453 3136//2452
f 3133//2448 3144//2463 3146//2462 3136//2452
f 3150//2465 3151//2466 3143//2456 3142//2455
f 3137//2453 3142//2455 3140//2457 3135//2454
f 3132//2450 3135//2454 3140//2457 3138//2458
f 3149//2460 3152//2467 3150//2465 3147//2461
f 3147//2461 3150//2465 3142//2455 3137//2453
f 3126//2442 3129//2447 3144//2463 3133//2448
f 3153//328 3154//182 3156//2468 3155//2469
f 3157//182 3158//182 3160//377 3159//2470
f 3161//2471 3162//2472 3165//2473 3163//2474
f 3166//2475 3167//2476 3169//2477 3168//2478
f 3155//2469 3156//2468 3162//2472 3161//2471
f 3159//2470 3160//377 3167//2476 3166//2475
f 3154//182 3157//182 3159//2470 3156//2468
f 3162//2472 3166//2475 3168//2478 3165//2473
f 3156//2468 3159//2470 3166//2475 3162//2472
f 3173//2479 3174//2480 3172//2481 3171//2482
f 3177//2483 3178//2484 3176//2485 3175//2486
f 3182//2487 3183//611 3181//2488 3180//2489
f 3182//2487 3184//2490 3185//611 3183//611
f 3191//2491 3192//2492 3190//2493 3189//2494
f 3186//2495 3189//2494 3190//2493 3187//2496
f 3186//2495 3188//2497 3191//2491 3189//2494
f 3195//2498 3196//611 3194//611 3193//2499
f 3195//2498 3198//2500 3199//611 3196//611
f 3186//2495 3187//2496 3178//2484 3177//2483
f 3178//2484 3187//2496 3190//2493 3179//2501
f 3193//2499 3194//611 3185//611 3184//2490
f 3178//2484 3182//2487 3180//2489 3176//2485
f 3178//2484 3179//2501 3184//2490 3182//2487
f 3192//2492 3195//2498 3193//2499 3190//2493
f 3190//2493 3193//2499 3184//2490 3179//2501
f 3192//2492 3197//2502 3198//2500 3195//2498
f 3150//2465 3171//2482 3172//2481 3151//2466
f 3150//2465 3152//2467 3173//2479 3171//2482
f 3149//2460 3170//2503 3173//2479 3152//2467
f 3163//2474 3175//2486 3176//2485 3164//2504
f 3163//2474 3165//2473 3177//2483 3175//2486
f 3168//2478 3169//2477 3188//2497 3186//2495
f 3165//2473 3168//2478 3186//2495 3177//2483
f 3128//2445 3153//328 3155//2469 3130//2446
f 3163//2474 3164//2504 3149//2460 3148//2459
f 3145//2464 3161//2471 3163//2474 3148//2459
f 3130//2446 3155//2469 3161//2471 3145//2464
f 3180//2489 3181//2488 3174//2480 3173//2479
f 3176//2485 3180//2489 3173//2479 3170//2503
f 3149//2460 3164//2504 3176//2485 3170//2503
f 3200//2505 3201//2506 3203//182 3202//182
f 3204//2507 3205//2508 3207//2509 3206//2510
f 3208//2511 3209//328 3211//2512 3210//2513
f 3212//182 3213//182 3215//374 3214//2514
f 3202//182 3203//182 3209//328 3208//2511
f 3206//2510 3207//2509 3213//182 3212//182
f 3201//2506 3204//2507 3206//2510 3203//182
f 3209//328 3212//182 3214//2514 3211//2512
f 3203//182 3206//2510 3212//182 3209//328
f 3216//2515 3217//2516 3219//2517 3218//2518
f 3220//2519 3221//2520 3223//2521 3222//2522
f 3224//182 3225//318 3227//182 3226//377
f 3228//2523 3229//2524 3231//2275 3230//182
f 3218//2518 3219//2517 3225//318 3224//182
f 3222//2522 3223//2521 3229//2524 3228//2523
f 3217//2516 3220//2519 3222//2522 3219//2517
f 3225//318 3228//2523 3230//182 3227//182
f 3219//2517 3222//2522 3228//2523 3225//318
f 3236//2525 3237//2526 3235//2527 3234//2528
f 3232//2529 3233//2530 3236//2525 3234//2528
f 3238//2531 3239//2532 3241//2533 3240//2534
f 3247//2535 3248//611 3246//611 3245//2536
f 3251//2537 3252//2538 3250//2539 3249//2540
f 3251//2537 3254//2541 3255//2542 3252//2538
f 3250//2539 3252//2538 3255//2542 3253//2543
f 3260//2544 3261//611 3259//611 3258//2545
f 3256//2546 3258//2545 3259//611 3257//611
f 3236//2525 3243//2547 3244//2548 3237//2526
f 3235//2527 3237//2526 3244//2548 3242//2549
f 3240//2534 3241//2533 3251//2537 3249//2540
f 3233//2530 3238//2531 3240//2534 3236//2525
f 3249//2540 3250//2539 3244//2548 3243//2547
f 3256//2546 3257//611 3248//611 3247//2535
f 3244//2548 3247//2535 3245//2536 3242//2549
f 3255//2542 3260//2544 3258//2545 3253//2543
f 3250//2539 3253//2543 3258//2545 3256//2546
f 3250//2539 3256//2546 3247//2535 3244//2548
f 3236//2525 3240//2534 3249//2540 3243//2547
f 3262//2550 3263//2551 3265//2552 3264//2553
f 3266//1906 3267//182 3269//2554 3268//2555
f 3274//2556 3275//2557 3273//2558 3272//2559
f 3270//2560 3271//2561 3274//2556 3272//2559
f 3278//2562 3279//2563 3282//2564 3280//2565
f 3264//2553 3265//2552 3271//2561 3270//2560
f 3268//2555 3269//2554 3279//2563 3278//2562
f 3263//2551 3266//1906 3268//2555 3265//2552
f 3280//2565 3281//2566 3275//2557 3274//2556
f 3271//2561 3278//2562 3280//2565 3274//2556
f 3265//2552 3268//2555 3278//2562 3271//2561
f 3210//2513 3211//2512 3233//2530 3232//2529
f 3214//2514 3215//374 3239//2532 3238//2531
f 3211//2512 3214//2514 3238//2531 3233//2530
f 3226//377 3227//182 3263//2551 3262//2550
f 3230//182 3231//2275 3267//182 3266//1906
f 3227//182 3230//182 3266//1906 3263//2551
f 3205//2508 3216//2515 3218//2518 3207//2509
f 3213//182 3224//182 3226//377 3215//374
f 3207//2509 3218//2518 3224//182 3213//182
f 3239//2532 3262//2550 3264//2553 3241//2533
f 3272//2559 3273//2558 3255//2542 3254//2541
f 3251//2537 3270//2560 3272//2559 3254//2541
f 3276//2567 3277//611 3261//611 3260//2544
f 3273//2558 3276//2567 3260//2544 3255//2542
f 3241//2533 3264//2553 3270//2560 3251//2537
f 3215//374 3226//377 3262//2550 3239//2532
f 3041//2375 3042//324 3124//2441 3123//2440
f 3045//325 3046//182 3128//2445 3127//2444
f 3042//324 3045//325 3127//2444 3124//2441
f 3062//182 3063//2389 3154//182 3153//328
f 3066//2393 3067//2392 3158//182 3157//182
f 3063//2389 3066//2393 3157//182 3154//182
f 3046//182 3062//182 3153//328 3128//2445
f 3091//2415 3092//2414 3201//2506 3200//2505
f 3096//2419 3097//2418 3205//2508 3204//2507
f 3092//2414 3096//2419 3204//2507 3201//2506
f 3105//2427 3106//2426 3217//2516 3216//2515
f 3113//2430 3115//2433 3221//2520 3220//2519
f 3106//2426 3113//2430 3220//2519 3217//2516
f 3097//2418 3105//2427 3216//2515 3205//2508
f 3054//2384 3055//2383 3069//2400 3068//2401
f 3054//2384 3068//2401 3071//2396 3057//2385
f 3065//2391 3089//2412 3091//2415 3067//2392
f 3058//2395 3059//2348 3076//2348 3075//2403
f 3055//2383 3058//2395 3075//2403 3069//2400
f 3057//2385 3071//2396 3089//2412 3065//2391
f 3158//182 3200//2505 3202//182 3160//377
f 3167//2476 3208//2511 3210//2513 3169//2477
f 3160//377 3202//182 3208//2511 3167//2476
f 3234//2528 3235//2527 3192//2492 3191//2491
f 3188//2497 3232//2529 3234//2528 3191//2491
f 3245//2536 3246//611 3199//611 3198//2500
f 3242//2549 3245//2536 3198//2500 3197//2502
f 3192//2492 3235//2527 3242//2549 3197//2502
f 3169//2477 3210//2513 3232//2529 3188//2497
f 3067//2392 3091//2415 3200//2505 3158//182
f 3286//2568 3287//2348 3289//2348 3288//2569
f 3284//2570 3286//2568 3288//2569 3285//2571
f 3290//2572 3291//2573 3293//2574 3292//2575
f 3290//2572 3292//2575 3295//2576 3294//2577
f 3301//2578 3302//2579 3304//2580 3303//2581
f 3299//2582 3302//2579 3301//2578 3298//2583
f 3299//2582 3300//2584 3304//2580 3302//2579
f 3305//2585 3306//2586 3308//2587 3307//2588
f 3310//2589 3311//2590 3313//2591 3312//2592
f 3314//2593 3315//2594 3317//2595 3316//2596
f 3294//2577 3295//2576 3311//2590 3310//2589
f 3301//2578 3303//2581 3315//2594 3314//2593
f 3292//2575 3293//2574 3299//2582 3298//2583
f 3292//2575 3298//2583 3301//2578 3295//2576
f 3311//2590 3314//2593 3316//2596 3313//2591
f 3296//2597 3297//2348 3306//2586 3305//2585
f 3299//2582 3305//2585 3307//2588 3300//2584
f 3307//2588 3309//2598 3304//2580 3300//2584
f 3293//2574 3296//2597 3305//2585 3299//2582
f 3295//2576 3301//2578 3314//2593 3311//2590
f 3321//2599 3323//2600 3322//2601 3320//2602
f 3325//2603 3327//1763 3326//2604 3324//2605
f 3329//2606 3331//1766 3330//1767 3328//2607
f 3319//2608 3325//2603 3324//2605 3318//2609
f 3323//2600 3329//2606 3328//2607 3322//2601
f 3328//2607 3330//1767 3327//1763 3325//2603
f 3322//2601 3328//2607 3325//2603 3319//2608
f 3332//182 3333//1780 3335//2610 3334//2611
f 3336//1781 3337//1778 3339//1778 3338//1781
f 3340//2612 3341//2613 3343//2614 3342//2615
f 3344//2616 3345//2617 3347//2618 3346//2619
f 3334//2611 3335//2610 3341//2613 3340//2612
f 3338//1781 3339//1778 3345//2617 3344//2616
f 3333//1780 3336//1781 3338//1781 3335//2610
f 3341//2613 3344//2616 3346//2619 3343//2614
f 3335//2610 3338//1781 3344//2616 3341//2613
f 3349//1763 3351//1763 3350//1782 3348//1782
f 3353//1766 3355//1766 3354//1767 3352//1767
f 3357//1763 3359//1763 3358//2620 3356//1782
f 3361//1766 3363//1766 3362//1767 3360//1767
f 3351//1763 3357//1763 3356//1782 3350//1782
f 3355//1766 3361//1766 3360//1767 3354//1767
f 3352//1767 3354//1767 3351//1763 3349//1763
f 3360//1767 3362//1767 3359//1763 3357//1763
f 3354//1767 3360//1767 3357//1763 3351//1763
f 3312//2592 3313//2591 3333//1780 3332//182
f 3316//2596 3317//2595 3337//1778 3336//1781
f 3313//2591 3316//2596 3336//1781 3333//1780
f 3327//1763 3349//1763 3348//1782 3326//2604
f 3331//1766 3353//1766 3352//1767 3330//1767
f 3330//1767 3352//1767 3349//1763 3327//1763
f 3303//2581 3304//2580 3319//2608 3318//2609
f 3315//2594 3324//2605 3326//2604 3317//2595
f 3307//2588 3308//2587 3321//2599 3320//2602
f 3307//2588 3320//2602 3322//2601 3309//2598
f 3304//2580 3309//2598 3322//2601 3319//2608
f 3303//2581 3318//2609 3324//2605 3315//2594
f 3337//1778 3348//1782 3350//1782 3339//1778
f 3345//2617 3356//1782 3358//2620 3347//2618
f 3339//1778 3350//1782 3356//1782 3345//2617
f 3317//2595 3326//2604 3348//1782 3337//1778
f 3284//2570 3291//2573 3290//2572 3283//2621
f 3284//2570 3285//2571 3293//2574 3291//2573
f 3289//2348 3297//2348 3296//2597 3288//2569
f 3288//2569 3296//2597 3293//2574 3285//2571
f 3368//2622 3369//611 3367//611 3366//2623
f 3372//2624 3373//2625 3371//2626 3370//2627
f 3377//2628 3378//611 3376//611 3375//2629
f 3377//2628 3379//2630 3380//611 3378//611
f 3375//2629 3376//611 3369//611 3368//2622
f 3365//2631 3368//2622 3366//2623 3364//2632
f 3373//2625 3377//2628 3375//2629 3371//2626
f 3373//2625 3374//2633 3379//2630 3377//2628
f 3371//2626 3375//2629 3368//2622 3365//2631
f 3386//2634 3387//2635 3385//2636 3384//2637
f 3381//2638 3384//2637 3385//2636 3382//2639
f 3381//2638 3383//2640 3386//2634 3384//2637
f 3390//2641 3391//611 3389//611 3388//2642
f 3396//2643 3397//2644 3395//2645 3394//2646
f 3392//2647 3393//2648 3396//2643 3394//2646
f 3406//2649 3407//2650 3405//611 3404//2651
f 3390//2641 3399//2652 3400//611 3391//611
f 3396//2643 3402//2653 3403//2654 3397//2644
f 3395//2645 3397//2644 3403//2654 3401//2655
f 3394//2646 3395//2645 3387//2635 3386//2634
f 3383//2640 3392//2647 3394//2646 3386//2634
f 3404//2651 3405//611 3400//611 3399//2652
f 3387//2635 3390//2641 3388//2642 3385//2636
f 3403//2654 3406//2649 3404//2651 3401//2655
f 3401//2655 3404//2651 3399//2652 3398//2656
f 3387//2635 3398//2656 3399//2652 3390//2641
f 3387//2635 3395//2645 3401//2655 3398//2656
f 3409//1763 3411//2657 3410//2658 3408//2659
f 3413//1766 3415//2660 3414//2661 3412//1767
f 3411//2657 3417//2662 3416//2663 3410//2658
f 3415//2660 3419//2664 3418//2665 3414//2661
f 3412//1767 3414//2661 3411//2657 3409//1763
f 3414//2661 3418//2665 3417//2662 3411//2657
f 3393//2648 3408//2659 3410//2658 3396//2643
f 3416//2663 3417//2662 3403//2654 3402//2653
f 3418//2665 3419//2664 3407//2650 3406//2649
f 3417//2662 3418//2665 3406//2649 3403//2654
f 3396//2643 3410//2658 3416//2663 3402//2653
f 3273//2558 3275//2557 3365//2631 3364//2632
f 3276//2567 3366//2623 3367//611 3277//611
f 3280//2565 3370//2627 3371//2626 3281//2566
f 3280//2565 3282//2564 3372//2624 3370//2627
f 3273//2558 3364//2632 3366//2623 3276//2567
f 3275//2557 3281//2566 3371//2626 3365//2631
f 3342//2615 3343//2614 3383//2640 3381//2638
f 3346//2619 3347//2618 3393//2648 3392//2647
f 3343//2614 3346//2619 3392//2647 3383//2640
f 3359//1763 3409//1763 3408//2659 3358//2620
f 3363//1766 3413//1766 3412//1767 3362//1767
f 3362//1767 3412//1767 3409//1763 3359//1763
f 3347//2618 3358//2620 3408//2659 3393//2648
f 3115//2433 3116//2432 3284//2570 3283//2621
f 3121//2435 3122//2348 3287//2348 3286//2568
f 3116//2432 3121//2435 3286//2568 3284//2570
f 3221//2520 3290//2572 3294//2577 3223//2521
f 3229//2524 3310//2589 3312//2592 3231//2275
f 3223//2521 3294//2577 3310//2589 3229//2524
f 3267//182 3332//182 3334//2611 3269//2554
f 3279//2563 3340//2612 3342//2615 3282//2564
f 3269//2554 3334//2611 3340//2612 3279//2563
f 3231//2275 3312//2592 3332//182 3267//182
f 3115//2433 3283//2621 3290//2572 3221//2520
f 3381//2638 3382//2639 3373//2625 3372//2624
f 3373//2625 3382//2639 3385//2636 3374//2633
f 3388//2642 3389//611 3380//611 3379//2630
f 3385//2636 3388//2642 3379//2630 3374//2633
f 3282//2564 3342//2615 3381//2638 3372//2624
f 2788//2181 2989//2666 2988//2667 2787//2182
f 2787//2182 2988//2667 2984//2668 2784//2174
f 3423//805 3424//2669 3426//2670 3425//805
f 3430//805 3431//2671 3433//2672 3432//805
f 3430//805 3434//805 3435//2673 3431//2671
f 3439//2674 3440//2675 3442//2676 3441//2677
f 3437//2678 3441//2677 3442//2676 3438//2679
f 3439//2674 3441//2677 3437//2678 3436//2680
f 3425//805 3426//2670 3435//2673 3434//805
f 3428//2681 3429//2682 3440//2675 3439//2674
f 3424//2669 3427//2683 3428//2681 3426//2670
f 3431//2671 3436//2680 3437//2678 3433//2672
f 3431//2671 3435//2673 3439//2674 3436//2680
f 3426//2670 3428//2681 3439//2674 3435//2673
f 3420//805 3421//2684 3424//2669 3423//805
f 3421//2684 3422//2685 3427//2683 3424//2669
f 3446//805 3447//2686 3449//2687 3448//805
f 3443//805 3444//2688 3447//2686 3446//805
f 3447//2686 3450//2689 3451//2690 3449//2687
f 3444//2688 3445//2691 3450//2689 3447//2686
f 3453//805 3454//2692 3456//2693 3455//805
f 3459//805 3460//2694 3462//2695 3461//805
f 3459//805 3463//805 3464//2696 3460//2694
f 3468//2697 3469//2698 3471//2699 3470//2700
f 3466//2701 3470//2700 3471//2699 3467//2702
f 3468//2697 3470//2700 3466//2701 3465//2703
f 3474//2704 3475//2705 3477//2706 3476//2707
f 3478//2708 3479//2709 3477//2706 3475//2705
f 3453//805 3472//805 3473//2710 3454//2692
f 3474//2704 3476//2707 3458//2711 3457//2712
f 3461//805 3462//2695 3473//2710 3472//805
f 3466//2701 3467//2702 3475//2705 3474//2704
f 3471//2699 3478//2708 3475//2705 3467//2702
f 3454//2692 3457//2712 3458//2711 3456//2693
f 3460//2694 3465//2703 3466//2701 3462//2695
f 3460//2694 3464//2696 3468//2697 3465//2703
f 3462//2695 3466//2701 3474//2704 3473//2710
f 3454//2692 3473//2710 3474//2704 3457//2712
f 3480//805 3481//2713 3483//2714 3482//805
f 3484//2715 3485//2716 3487//2717 3486//2718
f 3484//2715 3488//2719 3489//2720 3485//2716
f 3489//2720 3490//2721 3487//2717 3485//2716
f 3491//2722 3492//2723 3494//2724 3493//2725
f 3495//2726 3496//1357 3494//2724 3492//2723
f 3499//2727 3500//2728 3498//2729 3497//2730
f 3503//1361 3504//1002 3502//2731 3501//2732
f 3497//2730 3498//2729 3490//2721 3489//2720
f 3501//2732 3502//2731 3496//1357 3495//2726
f 3486//2718 3487//2717 3492//2723 3491//2722
f 3490//2721 3495//2726 3492//2723 3487//2717
f 3500//2728 3503//1361 3501//2732 3498//2729
f 3481//2713 3484//2715 3486//2718 3483//2714
f 3498//2729 3501//2732 3495//2726 3490//2721
f 3507//2733 3508//2734 3506//2735 3505//2736
f 3511//2737 3512//2738 3510//2739 3509//2740
f 3515//986 3516//986 3514//2741 3513//2742
f 3519//986 3520//1012 3518//986 3517//986
f 3513//2742 3514//2741 3508//2734 3507//2733
f 3517//986 3518//986 3512//2738 3511//2737
f 3508//2734 3511//2737 3509//2740 3506//2735
f 3516//986 3519//986 3517//986 3514//2741
f 3514//2741 3517//986 3511//2737 3508//2734
f 3443//805 3482//805 3483//2714 3444//2688
f 3451//2690 3493//2725 3494//2724 3452//2743
f 3491//2722 3493//2725 3451//2690 3450//2689
f 3444//2688 3483//2714 3486//2718 3445//2691
f 3486//2718 3491//2722 3450//2689 3445//2691
f 3505//2736 3506//2735 3471//2699 3469//2698
f 3509//2740 3510//2739 3479//2709 3478//2708
f 3506//2735 3509//2740 3478//2708 3471//2699
f 3448//805 3449//2687 3464//2696 3463//805
f 3451//2690 3452//2743 3469//2698 3468//2697
f 3449//2687 3451//2690 3468//2697 3464//2696
f 3496//1357 3507//2733 3505//2736 3494//2724
f 3504//1002 3515//986 3513//2742 3502//2731
f 3502//2731 3513//2742 3507//2733 3496//1357
f 3494//2724 3505//2736 3469//2698 3452//2743
f 3523//805 3524//2744 3526//2745 3525//805
f 3521//805 3525//805 3526//2745 3522//2746
f 3528//2747 3529//2748 3531//2749 3530//2750
f 3532//805 3533//2751 3535//2752 3534//805
f 3536//2753 3537//2754 3539//2755 3538//2756
f 3536//2753 3540//2757 3541//2758 3537//2754
f 3541//2758 3542//2759 3539//2755 3537//2754
f 3546//2760 3547//2761 3545//2762 3544//2763
f 3550//2764 3551//2765 3549//2766 3548//2767
f 3528//2747 3543//2768 3544//2763 3529//2748
f 3544//2763 3545//2762 3531//2749 3529//2748
f 3548//2767 3549//2766 3542//2759 3541//2758
f 3521//805 3522//2746 3533//2751 3532//805
f 3530//2750 3531//2749 3541//2758 3540//2757
f 3530//2750 3540//2757 3536//2753 3527//2769
f 3547//2761 3550//2764 3548//2767 3545//2762
f 3524//2744 3528//2747 3530//2750 3526//2745
f 3522//2746 3526//2745 3530//2750 3527//2769
f 3533//2751 3536//2753 3538//2756 3535//2752
f 3522//2746 3527//2769 3536//2753 3533//2751
f 3545//2762 3548//2767 3541//2758 3531//2749
f 3552//2770 3553//2771 3555//2772 3554//2773
f 3556//2774 3557//2775 3555//2772 3553//2771
f 3560//2776 3561//2777 3559//2778 3558//2779
f 3564//2780 3565//2781 3563//2782 3562//2783
f 3568//986 3569//986 3567//2741 3566//2784
f 3562//2783 3563//2782 3557//2775 3556//2774
f 3566//2784 3567//2741 3561//2777 3560//2776
f 3557//2775 3560//2776 3558//2779 3555//2772
f 3565//2781 3568//986 3566//2784 3563//2782
f 3563//2782 3566//2784 3560//2776 3557//2775
f 3572//2781 3573//986 3571//2785 3570//2786
f 3576//986 3577//986 3575//986 3574//2741
f 3580//1013 3581//1014 3579//1015 3578//986
f 3584//1016 3585//1026 3583//1029 3582//1017
f 3578//986 3579//1015 3573//986 3572//2781
f 3582//1017 3583//1029 3577//986 3576//986
f 3573//986 3576//986 3574//2741 3571//2785
f 3581//1014 3584//1016 3582//1017 3579//1015
f 3579//1015 3582//1017 3576//986 3573//986
f 3588//1012 3589//1013 3587//986 3586//986
f 3592//1014 3593//2787 3591//1017 3590//1015
f 3596//1027 3597//1030 3595//1033 3594//1028
f 3600//2788 3602//2789 3599//2790 3598//1032
f 3594//1028 3595//1033 3589//1013 3588//1012
f 3598//1032 3599//2790 3593//2787 3592//1014
f 3589//1013 3592//1014 3590//1015 3587//986
f 3597//1030 3600//2788 3598//1032 3595//1033
f 3595//1033 3598//1032 3592//1014 3589//1013
f 3570//2786 3571//2785 3547//2761 3546//2760
f 3574//2741 3575//986 3551//2765 3550//2764
f 3571//2785 3574//2741 3550//2764 3547//2761
f 3586//986 3587//986 3565//2781 3564//2780
f 3590//1015 3591//1017 3569//986 3568//986
f 3587//986 3590//1015 3568//986 3565//2781
f 3538//2756 3539//2755 3553//2771 3552//2770
f 3542//2759 3556//2774 3553//2771 3539//2755
f 3551//2765 3564//2780 3562//2783 3549//2766
f 3549//2766 3562//2783 3556//2774 3542//2759
f 3577//986 3588//1012 3586//986 3575//986
f 3585//1026 3596//1027 3594//1028 3583//1029
f 3583//1029 3594//1028 3588//1012 3577//986
f 3575//986 3586//986 3564//2780 3551//2765
f 3420//805 3534//805 3535//2752 3421//2684
f 3421//2684 3535//2752 3538//2756 3422//2685
f 3428//2681 3554//2773 3555//2772 3429//2682
f 3552//2770 3554//2773 3428//2681 3427//2683
f 3558//2779 3559//2778 3442//2676 3440//2675
f 3555//2772 3558//2779 3440//2675 3429//2682
f 3538//2756 3552//2770 3427//2683 3422//2685
f 3455//805 3456//2693 3524//2744 3523//805
f 3476//2707 3477//2706 3544//2763 3543//2768
f 3479//2709 3546//2760 3544//2763 3477//2706
f 3456//2693 3458//2711 3528//2747 3524//2744
f 3476//2707 3543//2768 3528//2747 3458//2711
f 3512//2738 3572//2781 3570//2786 3510//2739
f 3520//1012 3580//1013 3578//986 3518//986
f 3518//986 3578//986 3572//2781 3512//2738
f 3510//2739 3570//2786 3546//2760 3479//2709
f 3603//805 3604//2791 3606//2792 3605//805
f 3611//805 3612//2793 3614//2794 3613//805
f 3609//2795 3613//805 3614//2794 3610//2796
f 3616//2797 3617//2798 3619//2799 3618//2800
f 3622//2801 3623//2802 3625//2803 3624//2804
f 3626//2805 3627//2806 3625//2803 3623//2802
f 3631//2807 3632//2808 3630//2809 3629//2810
f 3603//805 3620//805 3621//2811 3604//2791
f 3622//2801 3624//2804 3608//2812 3607//2813
f 3616//2797 3628//2814 3629//2810 3617//2798
f 3629//2810 3630//2809 3619//2799 3617//2798
f 3605//805 3606//2792 3612//2793 3611//805
f 3624//2804 3625//2803 3629//2810 3628//2814
f 3627//2806 3631//2807 3629//2810 3625//2803
f 3604//2791 3607//2813 3608//2812 3606//2792
f 3612//2793 3616//2797 3618//2800 3614//2794
f 3610//2796 3614//2794 3618//2800 3615//2815
f 3606//2792 3608//2812 3616//2797 3612//2793
f 3604//2791 3621//2811 3622//2801 3607//2813
f 3624//2804 3628//2814 3616//2797 3608//2812
f 3634//2816 3636//2817 3635//2818 3633//2819
f 3641//2820 3643//2821 3642//2822 3640//2822
f 3645//2823 3647//2824 3646//2825 3644//2826
f 3636//2817 3641//2820 3640//2822 3635//2818
f 3639//2827 3645//2823 3644//2826 3638//2828
f 3637//2829 3638//2828 3636//2817 3634//2816
f 3644//2826 3646//2825 3643//2821 3641//2820
f 3638//2828 3644//2826 3641//2820 3636//2817
f 3609//2795 3610//2796 3634//2816 3633//2819
f 3618//2800 3619//2799 3639//2827 3638//2828
f 3618//2800 3638//2828 3637//2829 3615//2815
f 3632//2808 3647//2824 3645//2823 3630//2809
f 3610//2796 3615//2815 3637//2829 3634//2816
f 3630//2809 3645//2823 3639//2827 3619//2799
f 3650//2830 3651//2831 3649//2832 3648//2833
f 3654//2834 3655//2835 3653//2836 3652//2837
f 3658//986 3659//2838 3657//2838 3656//986
f 3662//2839 3663//2835 3661//2835 3660//2839
f 3656//986 3657//2838 3651//2831 3650//2830
f 3660//2839 3661//2835 3655//2835 3654//2834
f 3651//2831 3654//2834 3652//2837 3649//2832
f 3659//2838 3662//2839 3660//2839 3657//2838
f 3657//2838 3660//2839 3654//2834 3651//2831
f 3665//2821 3667//2821 3666//2822 3664//2822
f 3669//2840 3671//2840 3670//2825 3668//2825
f 3673//2821 3675//2821 3674//2822 3672//2822
f 3677//2841 3679//2841 3678//2825 3676//2825
f 3667//2821 3673//2821 3672//2822 3666//2822
f 3671//2840 3677//2841 3676//2825 3670//2825
f 3668//2825 3670//2825 3667//2821 3665//2821
f 3676//2825 3678//2825 3675//2821 3673//2821
f 3670//2825 3676//2825 3673//2821 3667//2821
f 3682//1026 3683//2842 3681//2843 3680//1029
f 3686//2844 3687//2845 3685//2846 3684//2847
f 3690//2848 3691//2849 3689//2850 3688//2851
f 3697//2852 3698//2853 3696//2854 3695//2855
f 3694//2856 3698//2853 3697//2852 3693//2857
f 3696//2854 3698//2853 3694//2856 3692//2858
f 3704//2859 3705//2860 3703//2861 3702//2862
f 3701//2863 3705//2860 3704//2859 3700//2864
f 3703//2861 3705//2860 3701//2863 3699//2865
f 3708//2866 3709//2867 3707//2868 3706//2869
f 3692//2858 3694//2856 3683//2842 3682//1026
f 3707//2868 3709//2867 3687//2845 3686//2844
f 3702//2862 3703//2861 3691//2849 3690//2848
f 3683//2842 3686//2844 3684//2847 3681//2843
f 3706//2869 3707//2868 3694//2856 3693//2857
f 3697//2852 3710//2870 3706//2869 3693//2857
f 3691//2849 3697//2852 3695//2855 3689//2850
f 3701//2863 3708//2866 3706//2869 3699//2865
f 3706//2869 3710//2870 3703//2861 3699//2865
f 3703//2861 3710//2870 3697//2852 3691//2849
f 3694//2856 3707//2868 3686//2844 3683//2842
f 3712//2871 3714//2872 3713//2873 3711//2822
f 3716//2874 3718//2875 3717//2876 3715//2877
f 3714//2872 3720//2878 3719//2879 3713//2873
f 3718//2875 3722//2880 3721//2881 3717//2876
f 3715//2877 3717//2876 3714//2872 3712//2871
f 3717//2876 3721//2881 3720//2878 3714//2872
f 3680//1029 3681//2843 3659//2838 3658//986
f 3684//2847 3685//2846 3663//2835 3662//2839
f 3681//2843 3684//2847 3662//2839 3659//2838
f 3675//2821 3712//2871 3711//2822 3674//2822
f 3679//2841 3716//2874 3715//2877 3678//2825
f 3678//2825 3715//2877 3712//2871 3675//2821
f 3655//2835 3671//2840 3669//2840 3653//2836
f 3663//2835 3679//2841 3677//2841 3661//2835
f 3661//2835 3677//2841 3671//2840 3655//2835
f 3719//2879 3720//2878 3701//2863 3700//2864
f 3687//2845 3718//2875 3716//2874 3685//2846
f 3721//2881 3722//2880 3709//2867 3708//2866
f 3720//2878 3721//2881 3708//2866 3701//2863
f 3709//2867 3722//2880 3718//2875 3687//2845
f 3685//2846 3716//2874 3679//2841 3663//2835
f 3648//2833 3649//2832 3627//2806 3626//2805
f 3652//2837 3653//2836 3632//2808 3631//2807
f 3649//2832 3652//2837 3631//2807 3627//2806
f 3643//2821 3665//2821 3664//2822 3642//2822
f 3647//2824 3669//2840 3668//2825 3646//2825
f 3646//2825 3668//2825 3665//2821 3643//2821
f 3653//2836 3669//2840 3647//2824 3632//2808
f 3432//805 3433//2672 3621//2811 3620//805
f 3437//2678 3438//2679 3623//2802 3622//2801
f 3442//2676 3626//2805 3623//2802 3438//2679
f 3433//2672 3437//2678 3622//2801 3621//2811
f 3561//2777 3650//2830 3648//2833 3559//2778
f 3569//986 3658//986 3656//986 3567//2741
f 3567//2741 3656//986 3650//2830 3561//2777
f 3593//2787 3682//1026 3680//1029 3591//1017
f 3695//2855 3696//2854 3602//2789 3601//2882
f 3602//2789 3696//2854 3692//2858 3599//2790
f 3599//2790 3692//2858 3682//1026 3593//2787
f 3591//1017 3680//1029 3658//986 3569//986
f 3559//2778 3648//2833 3626//2805 3442//2676
f 3725//986 3726//986 3724//986 3723//990
f 3729//1012 3730//1013 3728//986 3727//986
f 3733//1016 3734//1026 3732//1029 3731//1017
f 3737//1027 3738//1030 3736//1033 3735//1028
f 3731//1017 3732//1029 3726//986 3725//986
f 3735//1028 3736//1033 3730//1013 3729//1012
f 3726//986 3729//1012 3727//986 3724//986
f 3734//1026 3737//1027 3735//1028 3732//1029
f 3732//1029 3735//1028 3729//1012 3726//986
f 3741//1014 3742//1016 3740//1017 3739//1015
f 3745//1026 3746//1027 3744//1028 3743//1029
f 3749//2788 3751//2789 3748//2790 3747//1032
f 3754//2848 3755//2849 3753//2850 3752//2851
f 3761//2852 3762//2883 3760//2854 3759//2884
f 3758//2885 3762//2883 3761//2852 3757//2857
f 3760//2854 3762//2883 3758//2885 3756//2858
f 3747//1032 3748//2790 3742//1016 3741//1014
f 3756//2858 3758//2885 3746//1027 3745//1026
f 3742//1016 3745//1026 3743//1029 3740//1017
f 3759//2884 3760//2854 3751//2789 3750//2886
f 3751//2789 3760//2854 3756//2858 3748//2790
f 3755//2849 3761//2852 3759//2884 3753//2850
f 3748//2790 3756//2858 3745//1026 3742//1016
f 3769//2884 3770//2854 3768//2789 3767//2887
f 3768//2789 3770//2854 3766//2858 3765//2790
f 3774//2862 3775//2861 3773//2849 3772//2848
f 3778//2888 3779//1048 3777//2885 3776//2857
f 3777//2885 3781//2883 3780//2852 3776//2857
f 3780//2852 3782//2889 3778//2888 3776//2857
f 3785//2851 3786//2890 3784//2891 3783//2892
f 3787//2893 3788//2894 3790//2895 3789//2896
f 3764//2850 3786//2890 3785//2851 3763//2851
f 3768//2789 3792//2897 3791//2898 3767//2887
f 3791//2898 3793//2899 3769//2884 3767//2887
f 3772//2848 3773//2849 3764//2850 3763//2851
f 3780//2852 3781//2883 3770//2854 3769//2884
f 3770//2854 3781//2883 3777//2885 3766//2858
f 3775//2861 3782//2889 3780//2852 3773//2849
f 3778//2888 3782//2889 3775//2861 3771//2865
f 3786//2890 3793//2899 3791//2898 3784//2891
f 3773//2849 3780//2852 3769//2884 3764//2850
f 3769//2884 3793//2899 3786//2890 3764//2850
f 3797//2892 3798//2891 3796//2900 3795//2901
f 3796//2900 3800//2860 3799//2859 3795//2901
f 3803//2902 3804//2903 3802//1047 3801//1046
f 3805//2851 3806//2890 3798//2891 3797//2892
f 3798//2891 3803//2902 3801//1046 3796//2900
f 3806//2890 3807//2899 3803//2902 3798//2891
f 3765//2790 3766//2858 3734//1026 3733//1016
f 3777//2885 3779//1048 3738//1030 3737//1027
f 3766//2858 3777//2885 3737//1027 3734//1026
f 3751//2789 3804//2903 3803//2902 3750//2886
f 3802//1047 3804//2903 3751//2789 3749//2788
f 3753//2850 3806//2890 3805//2851 3752//2851
f 3759//2884 3807//2899 3806//2890 3753//2850
f 3803//2902 3807//2899 3759//2884 3750//2886
f 3730//1013 3741//1014 3739//1015 3728//986
f 3738//1030 3749//2788 3747//1032 3736//1033
f 3736//1033 3747//1032 3741//1014 3730//1013
f 3799//2859 3800//2860 3775//2861 3774//2862
f 3775//2861 3800//2860 3796//2900 3771//2865
f 3801//1046 3802//1047 3779//1048 3778//2888
f 3796//2900 3801//1046 3778//2888 3771//2865
f 3779//1048 3802//1047 3749//2788 3738//1030
f 3810//1030 3811//2788 3809//1032 3808//1033
f 3818//2855 3819//2854 3817//2789 3816//2904
f 3817//2789 3819//2854 3815//2858 3814//2790
f 3825//2859 3826//2860 3824//2861 3823//2862
f 3822//2900 3826//2860 3825//2859 3821//2901
f 3824//2861 3826//2860 3822//2900 3820//2865
f 3829//1046 3830//1047 3828//1048 3827//2888
f 3834//2851 3835//2890 3833//2891 3832//2892
f 3828//1048 3830//1047 3811//2788 3810//1030
f 3813//2850 3835//2890 3834//2851 3812//2851
f 3817//2789 3837//2903 3836//2905 3816//2904
f 3836//2905 3838//2899 3818//2855 3816//2904
f 3832//2892 3833//2891 3822//2900 3821//2901
f 3811//2788 3817//2789 3814//2790 3809//1032
f 3836//2905 3837//2903 3830//1047 3829//1046
f 3822//2900 3829//1046 3827//2888 3820//2865
f 3827//2888 3831//2870 3824//2861 3820//2865
f 3835//2890 3838//2899 3836//2905 3833//2891
f 3833//2891 3836//2905 3829//1046 3822//2900
f 3818//2855 3838//2899 3835//2890 3813//2850
f 3830//1047 3837//2903 3817//2789 3811//2788
f 3842//2862 3843//2861 3841//2849 3840//2848
f 3846//2869 3847//1048 3845//2885 3844//2857
f 3845//2885 3849//2883 3848//2852 3844//2857
f 3848//2852 3850//2870 3846//2869 3844//2857
f 3853//2892 3854//2906 3852//2907 3851//2901
f 3852//2907 3856//2860 3855//2908 3851//2901
f 3859//2905 3860//2903 3858//1047 3857//2909
f 3855//2908 3856//2860 3843//2861 3842//2862
f 3843//2861 3856//2860 3852//2907 3839//2865
f 3857//2909 3858//1047 3847//1048 3846//2869
f 3843//2861 3850//2870 3848//2852 3841//2849
f 3846//2869 3850//2870 3843//2861 3839//2865
f 3854//2906 3859//2905 3857//2909 3852//2907
f 3852//2907 3857//2909 3846//2869 3839//2865
f 3840//2848 3841//2849 3813//2850 3812//2851
f 3848//2852 3849//2883 3819//2854 3818//2855
f 3819//2854 3849//2883 3845//2885 3815//2858
f 3841//2849 3848//2852 3818//2855 3813//2850
f 3864//2910 3865//2911 3867//2912 3866//2913
f 3868//2914 3869//2915 3867//2912 3865//2911
f 3870//2916 3871//2917 3873//2918 3872//2919
f 3873//2918 3875//2920 3874//2919 3872//2919
f 3879//2921 3880//2922 3882//2923 3881//2924
f 3877//2925 3880//2922 3879//2921 3876//2926
f 3879//2921 3881//2924 3878//2927 3876//2926
f 3885//2928 3886//2929 3884//2930 3883//2931
f 3889//2932 3890//2933 3888//2934 3887//2935
f 3883//2931 3884//2930 3869//2915 3868//2914
f 3887//2935 3888//2934 3882//2923 3880//2922
f 3862//2936 3863//2937 3871//2917 3870//2916
f 3866//2913 3867//2912 3877//2925 3876//2926
f 3869//2915 3880//2922 3877//2925 3867//2912
f 3886//2929 3889//2932 3887//2935 3884//2930
f 3861//2938 3864//2910 3866//2913 3863//2937
f 3871//2917 3876//2926 3878//2927 3873//2918
f 3878//2927 3881//2924 3875//2920 3873//2918
f 3863//2937 3866//2913 3876//2926 3871//2917
f 3884//2930 3887//2935 3880//2922 3869//2915
f 3891//2939 3892//2940 3894//2941 3893//2942
f 3901//2943 3902//2944 3904//2945 3903//2946
f 3905//2947 3906//2948 3904//2945 3902//2944
f 3907//2949 3908//2950 3910//2951 3909//2952
f 3911//2953 3912//2954 3914//2955 3913//2956
f 3914//2955 3917//2957 3916//2958 3913//2956
f 3915//2959 3917//2957 3914//2955 3912//2954
f 3896//2960 3902//2944 3901//2943 3895//2961
f 3901//2943 3903//2946 3897//2962 3895//2961
f 3899//2963 3908//2950 3907//2949 3898//2964
f 3893//2942 3894//2941 3899//2963 3898//2964
f 3903//2946 3904//2945 3912//2954 3911//2953
f 3906//2948 3915//2959 3912//2954 3904//2945
f 3892//2940 3895//2961 3897//2962 3894//2941
f 3908//2950 3911//2953 3913//2956 3910//2951
f 3900//2965 3903//2946 3911//2953 3908//2950
f 3897//2962 3903//2946 3900//2965 3894//2941
f 3900//2965 3908//2950 3899//2963 3894//2941
f 3920//2966 3921//986 3919//2967 3918//986
f 3924//986 3925//986 3923//2968 3922//2969
f 3928//2970 3929//2971 3927//2972 3926//2973
f 3932//2974 3933//2975 3931//2976 3930//2977
f 3926//2973 3927//2972 3921//986 3920//2966
f 3930//2977 3931//2976 3925//986 3924//986
f 3921//986 3924//986 3922//2969 3919//2967
f 3929//2971 3932//2974 3930//2977 3927//2972
f 3927//2972 3930//2977 3924//986 3921//986
f 3936//2978 3937//2979 3935//2980 3934//2981
f 3940//2982 3941//2983 3939//2984 3938//2985
f 3944//2986 3945//2987 3943//986 3942//986
f 3948//986 3949//986 3947//2988 3946//2989
f 3942//986 3943//986 3937//2979 3936//2978
f 3946//2989 3947//2988 3941//2983 3940//2982
f 3937//2979 3940//2982 3938//2985 3935//2980
f 3945//2987 3948//986 3946//2989 3943//986
f 3943//986 3946//2989 3940//2982 3937//2979
f 3918//986 3919//2967 3886//2929 3885//2928
f 3922//2969 3923//2968 3890//2933 3889//2932
f 3919//2967 3922//2969 3889//2932 3886//2929
f 3934//2981 3935//2980 3906//2948 3905//2947
f 3938//2985 3939//2984 3917//2957 3915//2959
f 3935//2980 3938//2985 3915//2959 3906//2948
f 3874//2919 3875//2920 3892//2940 3891//2939
f 3881//2924 3882//2923 3896//2960 3895//2961
f 3890//2933 3905//2947 3902//2944 3888//2934
f 3875//2920 3881//2924 3895//2961 3892//2940
f 3888//2934 3902//2944 3896//2960 3882//2923
f 3925//986 3936//2978 3934//2981 3923//2968
f 3933//2975 3944//2986 3942//986 3931//2976
f 3931//2976 3942//986 3936//2978 3925//986
f 3923//2968 3934//2981 3905//2947 3890//2933
f 3952//2919 3953//2990 3955//2991 3954//2992
f 3951//2993 3953//2990 3952//2919 3950//2919
f 3957//2994 3958//2995 3960//2996 3959//2997
f 3961//2998 3962//2999 3964//3000 3963//3001
f 3954//2992 3955//2991 3962//2999 3961//2998
f 3953//2990 3957//2994 3959//2997 3955//2991
f 3956//3002 3957//2994 3953//2990 3951//2993
f 3955//2991 3959//2997 3965//3003 3962//2999
f 3969//3004 3970//3005 3968//3006 3966//3007
f 3974//3008 3975//3009 3977//3010 3976//3011
f 3978//3012 3979//3013 3977//3010 3975//3009
f 3982//986 3983//2978 3981//3014 3980//3015
f 3986//3016 3987//3017 3985//3018 3984//3019
f 3980//3015 3981//3014 3970//3005 3969//3004
f 3984//3019 3985//3018 3979//3013 3978//3012
f 3967//3020 3968//3006 3975//3009 3974//3008
f 3970//3005 3978//3012 3975//3009 3968//3006
f 3983//2978 3986//3016 3984//3019 3981//3014
f 3971//3021 3974//3008 3976//3011 3973//3022
f 3981//3014 3984//3019 3978//3012 3970//3005
f 3988//3023 3989//3024 3991//3025 3990//2919
f 3991//3025 3993//3026 3992//2919 3990//2919
f 3997//3027 3998//3028 4000//3029 3999//3030
f 3995//3031 3998//3028 3997//3027 3994//3032
f 3997//3027 3999//3030 3996//3033 3994//3032
f 4001//3034 4002//3035 4004//3036 4003//3037
f 4010//3038 4011//3039 4009//3040 4008//3041
f 4013//3042 4014//3043 4016//3044 4015//3045
f 4017//3046 4018//3047 4016//3044 4014//3043
f 4008//3041 4009//3040 4000//3029 3998//3028
f 4006//3048 4014//3043 4013//3042 4005//3049
f 4013//3042 4015//3045 4007//3050 4005//3049
f 3992//2919 3993//3026 4002//3035 4001//3034
f 3999//3030 4000//3029 4006//3048 4005//3049
f 4011//3039 4017//3046 4014//3043 4009//3040
f 3989//3024 3994//3032 3996//3033 3991//3025
f 3996//3033 3999//3030 3993//3026 3991//3025
f 4002//3035 4005//3049 4007//3050 4004//3036
f 3993//3026 3999//3030 4005//3049 4002//3035
f 4007//3050 4015//3045 4012//3051 4004//3036
f 4009//3040 4014//3043 4006//3048 4000//3029
f 3960//2996 3968//3006 3967//3020 3959//2997
f 3966//3007 3968//3006 3960//2996 3958//2995
f 3964//3000 3973//3022 3972//3052 3963//3001
f 3971//3021 3973//3022 3964//3000 3962//2999
f 3965//3003 3974//3008 3971//3021 3962//2999
f 3967//3020 3974//3008 3965//3003 3959//2997
f 3972//3052 3973//3022 3989//3024 3988//3023
f 3976//3011 3977//3010 3995//3031 3994//3032
f 3979//3013 3998//3028 3995//3031 3977//3010
f 3987//3017 4010//3038 4008//3041 3985//3018
f 3973//3022 3976//3011 3994//3032 3989//3024
f 3985//3018 4008//3041 3998//3028 3979//3013
f 3790//2895 3863//2937 3862//2936 3789//2896
f 3861//2938 3863//2937 3790//2895 3788//2894
f 3794//3053 3864//2910 3861//2938 3788//2894
f 3823//2862 3824//2861 3755//2849 3754//2848
f 3746//1027 3810//1030 3808//1033 3744//1028
f 3827//2888 3828//1048 3758//2885 3757//2857
f 3761//2852 3831//2870 3827//2888 3757//2857
f 3824//2861 3831//2870 3761//2852 3755//2849
f 3758//2885 3828//1048 3810//1030 3746//1027
f 3909//2952 3910//2951 3951//2993 3950//2919
f 3916//2958 3917//2957 3958//2995 3957//2994
f 3916//2958 3957//2994 3956//3002 3913//2956
f 3910//2951 3913//2956 3956//3002 3951//2993
f 3941//2983 3969//3004 3966//3007 3939//2984
f 3949//986 3982//986 3980//3015 3947//2988
f 3947//2988 3980//3015 3969//3004 3941//2983
f 3939//2984 3966//3007 3958//2995 3917//2957
f 4024//3054 4025//3055 4027//3056 4026//3057
f 4028//3058 4029//3059 4031//3060 4030//3061
f 4031//3060 4034//3062 4033//3063 4030//3061
f 4032//3064 4034//3062 4031//3060 4029//3059
f 4037//3065 4038//3066 4040//3067 4039//3068
f 4036//3069 4038//3066 4037//3065 4035//3065
f 4042//3070 4043//3071 4045//3072 4044//3073
f 4023//3074 4025//3055 4024//3054 4022//3075
f 4026//3057 4027//3056 4036//3069 4035//3065
f 4033//3063 4034//3062 4043//3071 4042//3070
f 4033//3063 4042//3070 4041//3076 4030//3061
f 4025//3055 4028//3058 4030//3061 4027//3056
f 4038//3066 4042//3070 4044//3073 4040//3067
f 4041//3076 4042//3070 4038//3066 4036//3069
f 4027//3056 4030//3061 4041//3076 4036//3069
f 4039//3068 4040//3067 4047//3077 4046//3078
f 4040//3067 4044//3073 4048//3079 4047//3077
f 4051//898 4052//3080 4050//3081 4049//898
f 4058//3082 4059//3083 4057//3084 4056//3085
f 4053//3086 4056//3085 4057//3084 4054//3087
f 4057//3084 4059//3083 4055//3088 4054//3087
f 4063//3089 4064//3090 4061//3091 4060//3092
f 4070//898 4071//3093 4069//3094 4068//898
f 4070//898 4072//898 4073//3095 4071//3093
f 4076//3096 4077//3097 4075//3098 4074//3099
f 4051//898 4065//898 4066//3100 4052//3080
f 4062//3101 4074//3099 4075//3098 4063//3089
f 4075//3098 4077//3097 4064//3090 4063//3089
f 4068//898 4069//3094 4066//3100 4065//898
f 4062//3101 4063//3089 4059//3083 4058//3082
f 4059//3083 4063//3089 4060//3092 4055//3088
f 4052//3080 4058//3082 4056//3085 4050//3081
f 4071//3093 4076//3096 4074//3099 4069//3094
f 4071//3093 4073//3095 4078//3102 4076//3096
f 4069//3094 4074//3099 4067//3103 4066//3100
f 4052//3080 4066//3100 4067//3103 4058//3082
f 4067//3103 4074//3099 4062//3101 4058//3082
f 4081//3104 4082//3105 4080//3106 4079//3107
f 4085//3108 4086//3109 4084//3110 4083//3111
f 4089//3112 4090//3113 4088//3114 4087//3115
f 4093//3116 4094//3117 4092//3118 4091//3119
f 4093//3116 4096//3120 4097//3121 4094//3117
f 4095//3122 4096//3120 4093//3116 4091//3119
f 4101//3123 4102//3124 4099//3125 4098//3126
f 4092//3118 4094//3117 4082//3105 4081//3104
f 4098//3126 4099//3125 4086//3109 4085//3108
f 4082//3105 4085//3108 4083//3111 4080//3106
f 4100//3127 4101//3123 4097//3121 4096//3120
f 4097//3121 4101//3123 4098//3126 4094//3117
f 4090//3113 4096//3120 4095//3122 4088//3114
f 4094//3117 4098//3126 4085//3108 4082//3105
f 4103//1248 4104//3128 4106//3129 4105//1248
f 4110//1248 4111//3130 4113//3131 4112//1248
f 4110//1248 4114//1248 4115//3132 4111//3130
f 4118//3133 4119//3134 4121//3135 4120//3136
[truncated: 55,562 more chars]
