# Supplementary material
Source: ML conference proceedings conference paper supplement (https://openaccess.thecvf.com/content/WACV2023/html/Plack_Fast_Differentiable_Transient_WACV_2023_paper.html)
Supplement: Supplementary file 2 [file Plack_Fast_Differentiable_Transient_WACV_2023_supplemental.zip › code/src/common/const.h]

#ifndef TOTRI_COMMON_CONST
#define TOTRI_COMMON_CONST

namespace totri {

const double C0 = 299792458.0;
const unsigned int MAX_UINT = 4294967295;

} // namespace totri

#endif //TOTRI_COMMON_CONST
