# Supplementary material
Source: ML conference proceedings conference paper supplement (https://openaccess.thecvf.com/content/WACV2023/html/Plack_Fast_Differentiable_Transient_WACV_2023_paper.html)
Supplement: Supplementary file 2 [file Plack_Fast_Differentiable_Transient_WACV_2023_supplemental.zip › code/src/render/volume.h]

#ifndef TOTRI_RENDER_VOLUME
#define TOTRI_RENDER_VOLUME

#include <array>
#include <torch/extension.h>

namespace totri {
namespace render {

void volume_confocal_forward(
  const at::Tensor volume, // X x Y x Z
  const at::Tensor measurement_points, // 3 x N
  at::Tensor transient, // N x T
  const std::array<float, 3> volume_origin,
  const std::array<float, 3> volume_size,
  const float bin_width, const float bin_offset);

void volume_confocal_grad_volume(
  at::Tensor volume, // X x Y x Z
  at::Tensor measurement_points, // 3 x N
  at::Tensor transient, // N x T
  std::array<float, 3> volume_origin,
  std::array<float, 3> volume_size,
  float bin_width, float bin_offset);

void volume_confocal_grad_measurement_points(
  at::Tensor measurement_points_grad, // 3 x N
  const at::Tensor volume, // X x Y x Z
  const at::Tensor measurement_points, // 3 x N
  const at::Tensor transient_grad, // N x T
  std::array<float, 3> volume_origin,
  std::array<float, 3> volume_size,
  float bin_width, float bin_offset);

void volume_render_exhaustive_forward(
  const at::Tensor volume, // [B, D, H, W]
  const at::Tensor scan_points, // [B, 3, S]
  const at::Tensor laser_points, // [B, 3, L]
  const at::Tensor scan_origin, // [B, 3, S]
  const at::Tensor laser_origin, // [B, 3, L]
  at::Tensor transient, // [B, N, S, L]
  const std::array<float, 3>& volume_start,
  const std::array<float, 3>& volume_end,
  const float bin_width, const float bin_offset);

void volume_render_exhaustive_grad_volume(
  const at::Tensor transient_grad, // [B, N, S, L]
  const at::Tensor scan_points, // [B, 3, S]
  const at::Tensor laser_points, // [B, 3, L]
  const at::Tensor scan_origin, // [B, 3, S]
  const at::Tensor laser_origin, // [B, 3, L]
  at::Tensor volume_grad, // [B, D, H, W]
  const std::array<float, 3>& volume_start,
  const std::array<float, 3>& volume_end,
  const float bin_width, const float bin_offset);

} // namespace render
} // namespace totri

#endif // TOTRI_RENDER_VOLUME
