# Supplementary material
Source: ML conference proceedings conference paper supplement (https://openaccess.thecvf.com/content/WACV2023/html/Plack_Fast_Differentiable_Transient_WACV_2023_paper.html)
Supplement: Supplementary file 2 [file Plack_Fast_Differentiable_Transient_WACV_2023_supplemental.zip › code/totri/data/__init__.py]

"""totri.data"""

from totri.data.lindellfk2019 import LindellFk2019
from totri.data.mesh import load_sample_mesh
from totri.data.otooleconfocal2018 import OTooleConfocal2018
from totri.data.pfm import PfmTransient
from totri.data.util import make_wall_grid, repo_path, transient_noise
from totri.data.veltennc2012 import VeltenNc2012
from totri.data.zaragoza import Zaragoza
