# Supplementary material
Source: ML conference proceedings conference paper supplement (https://openaccess.thecvf.com/content/WACV2023/html/Plack_Fast_Differentiable_Transient_WACV_2023_paper.html)
Supplement: Supplementary file 2 [file Plack_Fast_Differentiable_Transient_WACV_2023_supplemental.zip › code/totri/reconstruct/__init__.py]

"""totri.reconstruct"""

from totri.reconstruct.backprojection import (
    BackprojectionExhaustiveArellano,
    BackprojectionConfocalVelten,
    BackprojectionExhaustiveVelten,
    second_derivative_filter,
)

from totri.reconstruct.fk_migration import (
    FkMigration
)
