# Supplementary material
Source: ML conference proceedings conference paper supplement (https://openaccess.thecvf.com/content/WACV2023/html/Plack_Fast_Differentiable_Transient_WACV_2023_paper.html)
Supplement: Supplementary file 2 [file Plack_Fast_Differentiable_Transient_WACV_2023_supplemental.zip › code/totri/render/__init__.py]

"""totri.render"""

from totri.render.mesh import MeshRenderConfocal, MeshRenderExhaustive
from totri.render.volume import VolumeRenderConfocal
