# Supplementary material
Source: ML conference proceedings conference paper supplement (https://openaccess.thecvf.com/content/WACV2023/html/Plack_Fast_Differentiable_Transient_WACV_2023_paper.html)
Supplement: Supplementary file 2 [file Plack_Fast_Differentiable_Transient_WACV_2023_supplemental.zip › code/totri/util/__init__.py]

"""totri.util"""
from totri.util.depthmap import UnitDepthMapRender
from totri.util.format import (
    origin_of_wallpoints,
    verts_transform,
    faces_of_verts,
    colors_of_verts,
    tensor_to_chw,
)
from totri.util.log import datetime_str
from totri.util.optim import (
    Interpolator,
    ConstantInterpolator,
    LinearInterpolator,
    MultiplicativeInterpolator,
    TotriOptimizer,
)
from totri.util.rbf2volume import Rbf2VolumeGaussian
from totri.util.video import VideoWriter, RealTimeVideoWriter, VideoSummaryWriter
